# Supplementary material for: p63 Directs Subtype-Specific Gene Expression in HPV+ Head and Neck Squamous Cell Carcinoma
Source: Front Oncol. 2022 May 31;12:879054. doi: 10.3389/fonc.2022.879054 (PMC9192977; doi:10.3389/fonc.2022.879054)
Supplement: Supplementary file 2 [file Table_1.xlsx]

## Sheet: TCGA_DESeq2-resultsFile_pvalue
	baseMean	log2FoldChange	lfcSE	stat	pvalue	padj
DLK1	16.1915	-6.74976	1.39197	-4.84908	1.24e-06	7.76e-05
CHGB	402.461	-5.73039	0.778534	-7.3605	1.83e-13	6.72e-10
NR0B1	4.56106	-5.54109	1.48694	-3.7265	0.000194157	0.00254408
MAGEB2	5.72251	-5.44996	1.52485	-3.57409	0.000351448	0.00392675
MYH1	263.331	-5.37699	1.34646	-3.99344	6.51e-05	0.00117867
HCN4	13.303	-5.1315	0.757092	-6.77791	1.22e-11	1.49e-08
KRT36	117.85	-5.10804	0.813463	-6.27938	3.4e-10	2.08e-07
MYH2	828.174	-4.95569	1.45045	-3.41666	0.00063394	0.00586178
MYH7	514.33	-4.90545	0.954908	-5.13709	2.79e-07	2.78e-05
C1QL2	11.0922	-4.77307	1.12594	-4.23918	2.24e-05	0.00055673
MYH4	5.24135	-4.73029	1.82102	-2.59761	0.00938752	0.0385229
MYL1	393.608	-4.72716	1.42039	-3.32807	0.000874486	0.00737152
SPAG6	17.1684	-4.47538	0.782578	-5.71877	1.07e-08	2.81e-06
KCNH6	2.17014	-4.37663	1.38752	-3.15429	0.0016089	0.0111613
CSRP3	142.534	-4.3105	1.43459	-3.00469	0.00265849	0.0159325
INSM1	101.938	-4.30199	0.639119	-6.73113	1.68e-11	1.82e-08
LMOD2	50.2271	-4.19462	1.38481	-3.02903	0.00245338	0.0150202
TCAP	247.113	-4.17874	0.660489	-6.32673	2.5e-10	1.58e-07
FAM163A	20.9459	-4.11907	0.630088	-6.53729	6.26e-11	5.47e-08
PPP1R3A	3.53812	-4.04917	1.62839	-2.48661	0.0128966	0.0484005
NRAP	188.999	-4.01219	1.29389	-3.10087	0.00192953	0.0126703
ZP4	1.78967	-4.00193	1.26112	-3.17331	0.00150713	0.0106669
ABRA	2.71525	-3.99692	1.00949	-3.95933	7.52e-05	0.00130275
MYH6	27.8238	-3.989	0.924873	-4.31303	1.61e-05	0.000449402
MMP23A	2.26052	-3.98684	1.53058	-2.60479	0.00919305	0.0380055
GNG8	1.7617	-3.97919	1.26367	-3.1489	0.00163884	0.0113303
ACTN2	315.356	-3.97677	0.824244	-4.82475	1.4e-06	8.48e-05
CKM	484.086	-3.97608	0.795002	-5.00135	5.69e-07	4.68e-05
C10orf71	11.6935	-3.95318	1.69491	-2.33239	0.0196803	0.0656429
XIRP2	187.534	-3.90661	1.27304	-3.06873	0.00214971	0.0137298
C21orf29	13.5723	-3.90439	1.00359	-3.89041	0.000100075	0.00159139
MYOZ2	28.599	-3.89356	0.789511	-4.93162	8.16e-07	5.73e-05
NOL4	7.67462	-3.83632	0.875674	-4.381	1.18e-05	0.000371536
DNAI2	2.69705	-3.81435	0.794114	-4.80327	1.56e-06	9.03e-05
VGLL2	3.57516	-3.80156	1.47864	-2.57098	0.010141	0.0406943
PEBP4	2.48111	-3.7768	0.793632	-4.75889	1.95e-06	0.000106926
CACNA1S	30.3283	-3.77051	1.23439	-3.05455	0.002254	0.0141774
TRIM63	10.6915	-3.72616	0.916417	-4.06601	4.78e-05	0.000939833
SLN	62.6362	-3.7106	0.748912	-4.95466	7.25e-07	5.38e-05
CALN1	10.0432	-3.70037	0.983034	-3.76424	0.000167058	0.00230475
HHATL	10.0652	-3.66906	1.37957	-2.65957	0.00782411	0.0339137
KRT72	3.06569	-3.66515	0.813359	-4.50619	6.6e-06	0.000241664
CNTN2	25.718	-3.58305	0.709046	-5.05334	4.34e-07	3.89e-05
TSIX	4.63121	-3.5794	1.09205	-3.27769	0.00104662	0.00830727
SMPX	30.0573	-3.56416	1.30384	-2.73358	0.00626494	0.0289704
DES	1577.19	-3.5392	0.765378	-4.62412	3.76e-06	0.000167012
C6orf127	1.67414	-3.53371	1.42329	-2.48278	0.0130361	0.0486795
CNPY1	1.86193	-3.51548	1.65411	-2.1253	0.033562	0.0966179
ITGB1BP3	13.6898	-3.49836	1.51622	-2.30729	0.0210384	0.0689683
LRP2	12.6745	-3.49001	0.704091	-4.95677	7.17e-07	5.36e-05
MYL2	173.054	-3.48538	1.27324	-2.73741	0.00619243	0.0287293
TRDN	52.0948	-3.48456	1.15141	-3.02633	0.00247543	0.015124
MYPN	35.7258	-3.46375	1.15482	-2.99937	0.00270538	0.0161679
MYH8	8.60497	-3.40935	1.59624	-2.13587	0.0326903	0.0946882
ACTA1	548.231	-3.39435	0.749769	-4.5272	5.98e-06	0.000226893
FXYD2	151.979	-3.39205	0.627045	-5.40958	6.32e-08	9.9e-06
TTLL6	2.97838	-3.37687	0.711754	-4.74443	2.09e-06	0.000111768
FBXO40	3.24823	-3.3559	0.977278	-3.43393	0.000594905	0.00561378
FEZF2	8.21698	-3.32939	1.48775	-2.23787	0.0252292	0.0786563
MYBPH	105.48	-3.32673	0.967771	-3.43751	0.000587081	0.00556573
AGXT2L1	1.63021	-3.30698	1.03148	-3.20606	0.00134568	0.00985342
PRAMEF8	1.53554	-3.30462	1.559	-2.1197	0.0340315	0.0974948
MB	395.479	-3.29085	0.504618	-6.52147	6.96e-11	5.8e-08
SFTPA2	12.0644	-3.28818	0.828974	-3.96657	7.29e-05	0.00127575
MYOT	57.1201	-3.28733	0.771351	-4.26178	2.03e-05	0.000519567
C8G	113.377	-3.27688	0.551943	-5.937	2.9e-09	1.13e-06
PAH	2.50965	-3.27079	1.26293	-2.58983	0.0096022	0.0391497
HFE2	7.86038	-3.26727	1.52521	-2.14218	0.032179	0.0937403
HSPB7	191.515	-3.26101	0.60576	-5.38333	7.31e-08	1.1e-05
MAGEA3	6.99992	-3.25673	1.10922	-2.93606	0.00332406	0.0185643
ASB5	31.0873	-3.2425	1.41176	-2.29677	0.0216318	0.0702977
ASB10	1.30571	-3.24068	1.52742	-2.12167	0.0338653	0.0971401
TMOD4	14.1245	-3.22794	0.613932	-5.25781	1.46e-07	1.76e-05
KBTBD10	217.035	-3.21265	0.695182	-4.62131	3.81e-06	0.000167666
MYH13	2.18408	-3.21261	1.31777	-2.43792	0.014772	0.0533159
NPY6R	2.18127	-3.20517	1.20433	-2.66137	0.00778244	0.0337571
NEB	707.534	-3.15225	0.633593	-4.9752	6.52e-07	5.04e-05
LDB3	67.0326	-3.14469	0.491914	-6.39277	1.63e-10	1.15e-07
C10orf90	2.34037	-3.14376	0.775309	-4.05485	5.02e-05	0.000968225
MYBPC2	205.118	-3.13306	0.665223	-4.70979	2.48e-06	0.000125867
CASQ1	15.636	-3.12478	0.528666	-5.91068	3.41e-09	1.25e-06
SMYD1	18.8362	-3.11368	1.47805	-2.1066	0.0351518	0.0998774
APOBEC2	25.1615	-3.08643	0.705088	-4.37737	1.2e-05	0.000372653
DPYSL5	30.5744	-3.02247	0.889556	-3.39773	0.000679472	0.00616738
CCDC108	2.01269	-2.9969	1.23791	-2.42093	0.0154807	0.0552429
ANKRD1	103.754	-2.97447	0.966117	-3.07879	0.00207844	0.0133749
GP2	1.98205	-2.97432	1.20124	-2.47604	0.013285	0.0493978
SH3GL2	11.9092	-2.96692	0.600213	-4.94311	7.69e-07	5.6e-05
DUSP27	21.1008	-2.95994	1.13125	-2.61652	0.00888322	0.0370589
RTP3	31.7767	-2.94794	0.638995	-4.61341	3.96e-06	0.000172019
KIF1A	71.4454	-2.94498	0.889869	-3.30945	0.000934798	0.00772051
TRIM43	2.99297	-2.93781	1.14511	-2.56552	0.0103021	0.0411524
C21orf90	2.17426	-2.92537	1.09207	-2.67873	0.00739027	0.0324786
GPC5	1.52215	-2.91926	1.0602	-2.7535	0.00589614	0.0278479
MUC13	82.5962	-2.91059	0.696046	-4.18161	2.89e-05	0.000668131
TTN	1030.27	-2.89039	0.520848	-5.54941	2.87e-08	5.77e-06
GRM7	4.43087	-2.88822	0.668937	-4.31762	1.58e-05	0.000444384
CXCL6	231.11	-2.88453	0.55025	-5.24221	1.59e-07	1.86e-05
AMY1A	93.7057	-2.87458	0.645913	-4.45041	8.57e-06	0.000293183
IHH	1.65722	-2.8661	0.688951	-4.16009	3.18e-05	0.000713043
FOXI1	8.03194	-2.86565	0.750552	-3.81806	0.000134505	0.00197607
COX6A2	22.8544	-2.85946	0.683463	-4.18379	2.87e-05	0.000666226
WDR69	11.2948	-2.85649	0.853823	-3.34553	0.000821267	0.00707278
MYOZ1	48.733	-2.85286	0.618179	-4.61494	3.93e-06	0.000171655
KCNQ3	12.3062	-2.82241	0.588682	-4.79446	1.63e-06	9.3e-05
PEX5L	1.51249	-2.81505	0.829975	-3.39173	0.000694535	0.00627306
CST2	3.5481	-2.81463	0.660776	-4.25958	2.05e-05	0.000523003
PCSK2	5.54346	-2.8133	1.11614	-2.52056	0.0117168	0.0451699
FRMD1	30.7637	-2.79125	0.891599	-3.13061	0.00174446	0.0118505
LMOD3	31.4022	-2.78957	0.702308	-3.972	7.13e-05	0.00125721
HGC6.3	0.908643	-2.78394	1.2664	-2.19831	0.0279268	0.0848587
LSAMP	128.098	-2.7816	0.418522	-6.64624	3.01e-11	2.9e-08
SEZ6	1.23049	-2.77129	0.958499	-2.89129	0.00383667	0.0204453
CYP4F8	1.31139	-2.76497	1.06749	-2.59017	0.00959277	0.0391287
SLC22A16	6.96191	-2.75075	0.540457	-5.08968	3.59e-07	3.39e-05
ELAVL3	2.73564	-2.73521	0.985453	-2.77559	0.00551019	0.0264868
NOG	14.9291	-2.72954	0.752296	-3.62827	0.000285323	0.00338821
EDN3	3.30457	-2.72873	1.03347	-2.64036	0.00828187	0.0353464
C5orf49	6.16255	-2.72248	0.68605	-3.96833	7.24e-05	0.00127111
C2orf62	1.4364	-2.72027	0.717898	-3.78921	0.000151125	0.00213803
HNF1B	0.990305	-2.71477	1.02496	-2.64865	0.00808139	0.0347703
MAPK4	43.2752	-2.71244	0.666692	-4.06851	4.73e-05	0.00093282
GPR64	45.3957	-2.70097	0.447715	-6.0328	1.61e-09	7.58e-07
SCGB3A2	1.67647	-2.6959	1.26107	-2.13779	0.032534	0.0944391
CCL1	0.913273	-2.6916	1.18829	-2.26509	0.0235071	0.074758
CACNG1	12.6167	-2.67956	1.18222	-2.26656	0.0234171	0.0746051
SOX8	89.1381	-2.67603	0.513567	-5.21068	1.88e-07	2.09e-05
SRRM4	1.90088	-2.66732	0.953547	-2.79726	0.00515388	0.0252597
TNNC2	81.3547	-2.64397	0.59893	-4.41449	1.01e-05	0.000332097
RBP4	15.3126	-2.64112	0.690522	-3.82482	0.000130867	0.00194287
NKX2.4	24.8133	-2.63346	0.960816	-2.74086	0.00612795	0.0285385
GFI1B	4.10106	-2.63009	0.716421	-3.67116	0.000241456	0.00298536
MS4A8B	3.64292	-2.62718	0.907494	-2.89498	0.0037918	0.0202808
SLC16A12	7.14662	-2.62093	0.588356	-4.45467	8.4e-06	0.000290666
FRMPD2	1.79182	-2.6153	0.689765	-3.79159	0.000149688	0.0021259
ADCYAP1R1	4.56706	-2.615	0.841176	-3.10875	0.00187884	0.0124477
CLUL1	10.0111	-2.61186	0.603227	-4.32981	1.49e-05	0.000424896
FAM196A	16.7282	-2.61073	0.499556	-5.22611	1.73e-07	1.96e-05
C2orf58	3.3983	-2.6023	0.529906	-4.91087	9.07e-07	6.18e-05
ASCL1	1.84286	-2.59836	0.727239	-3.57291	0.00035304	0.00393017
KCNH3	65.0584	-2.59608	0.432867	-5.99739	2.01e-09	8.52e-07
MYL3	7.57276	-2.59581	0.910976	-2.84949	0.00437901	0.0225444
C6orf176	4.6807	-2.59387	0.876625	-2.95893	0.00308708	0.0176714
SNAP25	58.8758	-2.59086	0.525667	-4.92871	8.28e-07	5.75e-05
SHISA3	6.67327	-2.58453	0.726301	-3.55848	0.000373007	0.00409434
MYLPF	31.0359	-2.57914	0.745447	-3.45986	0.000540458	0.0052653
DCX	3.16638	-2.56286	0.854683	-2.99861	0.00271217	0.0161821
SCN4A	16.9198	-2.55115	0.714	-3.57304	0.000352866	0.00393017
CAPSL	0.776338	-2.53822	1.16242	-2.18356	0.0289943	0.0871636
ZBBX	1.13699	-2.53455	1.02025	-2.48425	0.0129825	0.0485594
HMX1	33.621	-2.51985	0.719835	-3.5006	0.000464214	0.00471687
ENPP6	106.253	-2.51495	0.584999	-4.29906	1.72e-05	0.000468684
LOC440896	3.33867	-2.51298	0.71535	-3.51294	0.000443182	0.00456259
CHRNA4	13.0825	-2.50335	1.12118	-2.23278	0.0255637	0.079487
FCER2	71.2008	-2.49701	0.652213	-3.82852	0.000128915	0.0019248
ANKRD23	114.433	-2.49251	0.373597	-6.67165	2.53e-11	2.58e-08
AMY2A	3.01611	-2.49202	0.580487	-4.29298	1.76e-05	0.000476733
TEKT2	17.4009	-2.47175	0.547452	-4.51501	6.33e-06	0.000235946
FAM150B	24.4519	-2.46503	0.455186	-5.41544	6.11e-08	9.84e-06
DUSP13	15.4271	-2.4618	0.537766	-4.57782	4.7e-06	0.000191865
TDRG1	4.66592	-2.46114	1.02848	-2.39299	0.0167116	0.058419
TCERG1L	46.7948	-2.44598	0.631513	-3.87321	0.00010741	0.00167463
LOC400891	1.004	-2.43826	1.03284	-2.36072	0.0182394	0.0620906
HFM1	3.17867	-2.42214	0.811781	-2.98373	0.00284758	0.016702
C1orf168	9.84405	-2.41379	0.611002	-3.95054	7.8e-05	0.00134114
PCDP1	2.88577	-2.39281	0.886525	-2.69909	0.00695295	0.0310781
CKMT2	22.5579	-2.3928	0.754383	-3.17187	0.00151462	0.0107098
TNNC1	98.7094	-2.38242	0.699115	-3.40776	0.000654983	0.00600756
CLDND2	2.73795	-2.37576	0.597693	-3.97489	7.04e-05	0.00124856
FLJ42875	2.75328	-2.371	0.525342	-4.51324	6.38e-06	0.000237145
C4orf7	7608.83	-2.36582	0.705275	-3.35446	0.000795198	0.00691454
MYOZ3	12.3247	-2.36276	0.486978	-4.85189	1.22e-06	7.73e-05
WNT8B	0.897922	-2.35129	1.02671	-2.29012	0.0220145	0.071188
REM1	69.2555	-2.3469	0.441967	-5.31012	1.1e-07	1.42e-05
LOC100129066	5.83531	-2.34114	0.481736	-4.85979	1.18e-06	7.61e-05
ZDHHC8P1	25.5065	-2.33019	0.532147	-4.37884	1.19e-05	0.000372042
TNNI2	140.8	-2.30877	0.509182	-4.53426	5.78e-06	0.000221263
SP5	57.2085	-2.30738	0.459152	-5.0253	5.03e-07	4.23e-05
KRT38	3.75701	-2.30615	0.955674	-2.41312	0.0158167	0.0560099
SLC6A13	1.63448	-2.30411	0.764189	-3.0151	0.00256894	0.0155348
BCORL2	6.11324	-2.29459	0.504612	-4.54724	5.44e-06	0.000211142
KIR2DS4	6.97162	-2.29449	0.661286	-3.46974	0.000520965	0.00514096
C6orf105	252.523	-2.28966	0.419549	-5.45742	4.83e-08	8.34e-06
HRC	38.4378	-2.28382	0.529638	-4.31204	1.62e-05	0.000450734
DEFA1B	1.24134	-2.27994	0.78697	-2.89711	0.00376616	0.0201849
PNMA2	81.3121	-2.27531	0.469144	-4.84993	1.24e-06	7.76e-05
PZP	1.03623	-2.27104	0.82147	-2.76461	0.00569909	0.0271692
SCT	5.78055	-2.25854	0.534266	-4.22737	2.36e-05	0.000576489
OCM	0.795398	-2.25629	0.702371	-3.21239	0.00131637	0.00973996
LOC100240735	3.54249	-2.24925	0.417161	-5.39179	6.98e-08	1.06e-05
ERAS	0.69278	-2.24549	0.792679	-2.83278	0.00461448	0.0233461
DYSFIP1	17.7769	-2.23823	0.830411	-2.69532	0.007032	0.0313321
HGD	1.98663	-2.23801	0.639781	-3.49808	0.000468613	0.00474435
ERBB4	17.1199	-2.23784	0.761819	-2.9375	0.00330868	0.0185235
ASCL4	37.8159	-2.22648	0.74046	-3.00689	0.00263938	0.0158458
APOA1	2.19658	-2.22556	0.646078	-3.44473	0.000571633	0.00547591
ROPN1L	4.21586	-2.21891	0.508108	-4.367	1.26e-05	0.000381742
KRT73	2.19208	-2.21832	0.850957	-2.60685	0.00913795	0.0378534
CELF4	28.7978	-2.21609	0.462246	-4.79418	1.63e-06	9.3e-05
TMEM190	2.09269	-2.21387	0.785779	-2.81742	0.00484107	0.0241002
RBM46	0.725622	-2.21085	0.912524	-2.42279	0.015402	0.0550909
C17orf88	0.881671	-2.21058	0.876886	-2.52095	0.0117039	0.0451464
RASD2	216.524	-2.20815	0.426987	-5.17148	2.32e-07	2.43e-05
KRT84	22.7667	-2.19617	0.6853	-3.20469	0.00135208	0.00988058
DUSP15	13.715	-2.19307	0.431068	-5.08752	3.63e-07	3.41e-05
SFTPA1	3.70232	-2.18212	0.971173	-2.24689	0.0246471	0.0773476
LOC643763	1.84252	-2.18099	0.739839	-2.94792	0.00319915	0.0181187
ZBTB8B	12.0694	-2.17353	0.760877	-2.85661	0.00428188	0.0222151
ACTC1	228.009	-2.17279	0.961379	-2.26008	0.0238165	0.0754712
FAM71E2	34.7656	-2.16682	0.714547	-3.03243	0.00242593	0.0149059
UPK3A	4.3857	-2.16409	0.49949	-4.3326	1.47e-05	0.000422751
C9orf50	0.914419	-2.16365	0.757642	-2.85578	0.00429319	0.0222549
FAM129C	26.2723	-2.15953	0.55198	-3.91232	9.14e-05	0.00148454
LRRC2	17.0251	-2.1564	0.408616	-5.27733	1.31e-07	1.62e-05
MYLK2	26.2488	-2.15052	0.376638	-5.70979	1.13e-08	2.88e-06
MYCNOS	0.693801	-2.14451	0.830773	-2.58135	0.00984154	0.0398684
SRD5A2	1.51387	-2.13974	0.674246	-3.17354	0.00150595	0.0106669
PVALB	7.74274	-2.13939	0.700602	-3.05365	0.00226076	0.0142053
NPHS1	15.4177	-2.13886	0.68404	-3.12681	0.00176713	0.0119603
CXorf65	3.47283	-2.13679	0.479799	-4.45351	8.45e-06	0.000290733
HAO2	1.02151	-2.13537	0.881432	-2.42262	0.0154092	0.0550961
C10orf107	2.53742	-2.13381	0.772442	-2.76242	0.00573739	0.0272809
MYO18B	58.6595	-2.12951	0.760507	-2.80012	0.00510842	0.0250838
MIA	17.8298	-2.12671	0.593006	-3.58631	0.000335386	0.00379426
LRRC10B	15.6769	-2.12264	0.485836	-4.36905	1.25e-05	0.00038069
SLC24A5	1.6747	-2.11724	0.737758	-2.86982	0.004107	0.0215394
GBA3	2.48985	-2.11509	0.627116	-3.37272	0.000744301	0.0066022
KIF25	12.5297	-2.10853	0.63781	-3.30589	0.000946767	0.00778778
GAS2L2	7.24324	-2.10751	0.608551	-3.46316	0.000533864	0.00523164
FAM92B	8.65034	-2.10154	0.49823	-4.21802	2.46e-05	0.000594582
DDN	91.9739	-2.1007	0.514813	-4.08051	4.49e-05	0.00090343
MEGF11	2.46769	-2.09976	0.508222	-4.13158	3.6e-05	0.000773486
SGCA	16.934	-2.09895	0.560533	-3.74456	0.000180709	0.00241494
REEP2	107.569	-2.09681	0.386416	-5.42629	5.75e-08	9.5e-06
MT1DP	1.69572	-2.09647	0.660668	-3.17326	0.00150739	0.0106669
BCL2A1	214.295	-2.0941	0.326544	-6.41292	1.43e-10	1.09e-07
CTRC	1.32611	-2.09312	0.674092	-3.1051	0.00190215	0.0125453
CPNE4	3.77553	-2.09223	0.942706	-2.21939	0.0264603	0.0816201
INSL3	7.03064	-2.08967	0.348612	-5.99426	2.04e-09	8.52e-07
CSAG3	67.3782	-2.08657	0.690643	-3.0212	0.00251776	0.0153366
CPLX3	6.37323	-2.08546	0.867551	-2.40384	0.0162238	0.0571717
PRR18	10.8035	-2.07811	0.906606	-2.29218	0.0218952	0.0708897
CCDC135	0.716259	-2.07454	0.942369	-2.20141	0.0277072	0.0843734
TNNT3	358.568	-2.05388	0.585911	-3.50545	0.000455844	0.00465881
C6orf81	3.24144	-2.0529	0.519304	-3.95318	7.71e-05	0.00133138
NEURL3	76.2465	-2.0503	0.442714	-4.6312	3.64e-06	0.000163642
KLKB1	5.88696	-2.04098	0.493721	-4.13387	3.57e-05	0.000768544
C1orf95	11.3002	-2.04088	0.552203	-3.69588	0.000219123	0.00277077
MAEL	0.746872	-2.04064	0.895772	-2.27808	0.0227219	0.072919
DUSP26	44.1343	-2.03996	0.592375	-3.44369	0.000573834	0.00549126
LOC284276	11.3427	-2.03963	0.519922	-3.92296	8.75e-05	0.00144091
STAC3	159.861	-2.03947	0.36843	-5.53555	3.1e-08	5.96e-06
VIL1	1.60868	-2.03626	0.924458	-2.20265	0.0276194	0.0841618
RUFY4	48.7995	-2.03603	0.39188	-5.19555	2.04e-07	2.23e-05
BEND5	57.684	-2.03425	0.410572	-4.95468	7.25e-07	5.38e-05
SNORA63	0.567055	-2.03198	0.954967	-2.1278	0.0333535	0.096199
ITIH1	2.71879	-2.02979	0.628002	-3.23213	0.0012287	0.00926328
SPIB	661.742	-2.02011	0.573051	-3.52519	0.000423179	0.00443625
CCDC60	20.799	-2.01941	0.643586	-3.13775	0.00170249	0.0116388
PYDC1	41.5071	-2.01831	0.927666	-2.17569	0.0295788	0.0883412
P2RX2	2.17532	-2.00524	0.61328	-3.2697	0.00107663	0.00848664
CHRNA1	38.6846	-2.00502	0.557426	-3.59693	0.000321991	0.0036852
LRRC50	6.41985	-2.00417	0.511423	-3.91881	8.9e-05	0.0014529
FAM19A3	5.71077	-2.00407	0.535384	-3.74324	0.000181663	0.00242011
FATE1	11.4007	-2.00382	0.531489	-3.7702	0.000163119	0.00226404
C14orf73	171.588	-2.00369	0.432166	-4.63639	3.55e-06	0.000161709
MATN4	7.83642	-2.00209	0.460969	-4.34322	1.4e-05	0.000409936
DPY19L2P4	2.08314	-1.99806	0.88528	-2.25698	0.0240092	0.075911
FAM134B	226.338	-1.99263	0.385488	-5.16911	2.35e-07	2.44e-05
LOC606724	92.8595	-1.98571	0.331134	-5.99668	2.01e-09	8.52e-07
ANKRD2	19.6931	-1.98552	0.518281	-3.83097	0.000127638	0.00191197
TMEM35	18.579	-1.98453	0.565541	-3.50908	0.000449664	0.00461107
NCRNA00158	1.61584	-1.98085	0.688278	-2.87798	0.00400225	0.0211291
PDLIM3	1882.85	-1.97695	0.480599	-4.11351	3.9e-05	0.000820319
TG	188.829	-1.96471	0.517688	-3.79517	0.000147543	0.00211344
HSPB6	208.416	-1.9522	0.433235	-4.50609	6.6e-06	0.000241664
MCF2	2.11127	-1.94266	0.535336	-3.62886	0.000284681	0.00338278
ADCY10	2.9266	-1.93343	0.63377	-3.05068	0.0022832	0.0143071
OR52N4	1.12394	-1.93132	0.681728	-2.83297	0.00461173	0.0233387
SYPL2	21.9161	-1.92916	0.509715	-3.78478	0.000153847	0.00216816
PHF21B	12.0136	-1.92723	0.693913	-2.77734	0.00548055	0.0263876
PPP1R14D	2.53254	-1.92409	0.569424	-3.37901	0.000727473	0.0064839
SLC5A2	1.36159	-1.92038	0.852271	-2.25325	0.0242436	0.0764412
UNC45B	25.8947	-1.91969	0.744812	-2.57741	0.00995435	0.0402118
LOC374491	0.886622	-1.91939	0.683236	-2.80926	0.00496559	0.0245534
UTS2R	1.44963	-1.91829	0.702076	-2.73232	0.00628907	0.0290454
ESRRB	15.238	-1.917	0.747122	-2.56584	0.0102926	0.0411232
LCNL1	1.67005	-1.91553	0.701938	-2.72891	0.00635438	0.0292659
ZCCHC18	13.1086	-1.91057	0.341414	-5.59606	2.19e-08	4.84e-06
TMEM90A	2.56654	-1.90976	0.654067	-2.91982	0.00350237	0.0191852
LOC283663	48.1479	-1.90972	0.378483	-5.04573	4.52e-07	3.98e-05
LCN10	15.0717	-1.90933	0.402706	-4.74126	2.12e-06	0.000112878
NME5	1.97856	-1.90902	0.786111	-2.42844	0.0151639	0.0544414
HABP2	7.4629	-1.90735	0.61758	-3.08842	0.00201223	0.0130645
S100A1	68.9169	-1.90732	0.39283	-4.85532	1.2e-06	7.73e-05
TTC16	6.80107	-1.90559	0.386071	-4.93585	7.98e-07	5.67e-05
SLC22A1	14.8081	-1.90455	0.507968	-3.74936	0.000177289	0.00238789
TMEM200C	22.5489	-1.90248	0.497479	-3.82424	0.000131177	0.00194432
LTF	4901.92	-1.90116	0.647622	-2.93561	0.00332896	0.0185747
SYCE1	3.40032	-1.89961	0.570198	-3.33149	0.000863825	0.00732203
PTGIR	79.1162	-1.89597	0.319885	-5.92702	3.08e-09	1.15e-06
OTP	2.77558	-1.89378	0.668211	-2.83411	0.00459539	0.0232772
HAS1	12.2999	-1.8883	0.526734	-3.58492	0.000337178	0.00381144
PAK3	14.9354	-1.88086	0.620054	-3.03338	0.00241827	0.0148739
KIRREL2	19.6705	-1.87846	0.552729	-3.39851	0.000677533	0.00615893
DCHS2	45.8749	-1.86998	0.486834	-3.84111	0.000122477	0.00185129
NPTX1	27.7448	-1.86867	0.538817	-3.46809	0.000524169	0.00516146
TCL6	3.91316	-1.86834	0.801546	-2.33092	0.0197574	0.0658399
FSD1	28.3424	-1.86358	0.388802	-4.79314	1.64e-06	9.32e-05
PENK	104.016	-1.8628	0.649718	-2.86709	0.00414261	0.0217014
PKDCC	650.478	-1.85855	0.520827	-3.56845	0.000359096	0.00398549
KCNIP3	157.665	-1.85203	0.35692	-5.18892	2.12e-07	2.28e-05
C14orf68	0.808123	-1.84889	0.740199	-2.49783	0.0124955	0.0473454
HRNBP3	2.68921	-1.84692	0.672583	-2.74601	0.00603252	0.028237
RS1	0.863862	-1.84679	0.560655	-3.29398	0.000987802	0.00801451
PCDH8	6.84662	-1.84372	0.710247	-2.59589	0.00943468	0.0386645
GOLT1A	33.0135	-1.84224	0.537999	-3.42425	0.000616505	0.00576076
SEC14L4	23.7636	-1.83586	0.769391	-2.38611	0.0170274	0.0592969
GUCY2C	15.033	-1.83303	0.628819	-2.91504	0.00355641	0.0193664
CCDC65	5.28958	-1.83266	0.466925	-3.92495	8.67e-05	0.00143823
VIPR2	14.8704	-1.83019	0.561137	-3.26158	0.00110791	0.00863674
UBD	4782.22	-1.82893	0.397541	-4.6006	4.21e-06	0.000178386
LINGO4	3.41235	-1.82441	0.543356	-3.35767	0.000786028	0.00686931
WNT1	4.43303	-1.82264	0.388638	-4.68982	2.73e-06	0.000133696
CA3	28.4248	-1.82095	0.528961	-3.44251	0.000576344	0.00550378
IGSF22	3.71997	-1.82065	0.428331	-4.25057	2.13e-05	0.00053925
HIST1H3I	0.659513	-1.82044	0.730957	-2.49049	0.0127566	0.0480586
FAM57B	17.9997	-1.81951	0.46029	-3.95296	7.72e-05	0.00133138
OXT	1.92291	-1.8157	0.609586	-2.97858	0.00289589	0.0168881
ATP2B2	28.4008	-1.81402	0.581416	-3.12	0.00180849	0.0121505
AIPL1	4.77651	-1.81057	0.588421	-3.07699	0.002091	0.0134238
C20orf203	0.942522	-1.80344	0.707911	-2.54755	0.0108482	0.042747
PTPRR	17.9651	-1.79539	0.473156	-3.7945	0.00014794	0.00211387
MESP1	34.0027	-1.79358	0.398455	-4.50134	6.75e-06	0.000246632
C2orf40	13.5866	-1.79217	0.728709	-2.45938	0.0139179	0.051171
CCDC74A	162.775	-1.78918	0.360518	-4.9628	6.95e-07	5.33e-05
CRYBA4	0.689833	-1.78751	0.759981	-2.35205	0.0186703	0.0630889
MYLK3	5.7746	-1.78639	0.449055	-3.9781	6.95e-05	0.00123419
RET	123.886	-1.78119	0.501462	-3.55199	0.000382325	0.00415034
RSPH9	2.2286	-1.77974	0.444977	-3.99962	6.34e-05	0.00115172
SLC18A1	0.984943	-1.77953	0.688187	-2.58582	0.00971474	0.0394769
CYP1B1	738.608	-1.77899	0.418599	-4.24986	2.14e-05	0.000539466
BTNL9	597.786	-1.77567	0.462528	-3.83905	0.000123513	0.00185929
GHRL	9.20805	-1.77549	0.39341	-4.51308	6.39e-06	0.000237145
ECEL1	52.967	-1.77437	0.505211	-3.51214	0.000444506	0.00456739
RSPO4	12.7324	-1.77387	0.627762	-2.8257	0.00471777	0.0237182
ITLN1	1.27489	-1.76982	0.808645	-2.18863	0.0286239	0.0863883
CACNA1F	11.5893	-1.76571	0.378631	-4.66342	3.11e-06	0.000146211
LRRC39	9.77593	-1.7644	0.396253	-4.45271	8.48e-06	0.000291133
EBF3	128.269	-1.75651	0.344476	-5.09907	3.41e-07	3.24e-05
IGFALS	12.5749	-1.75555	0.494935	-3.54703	0.000389597	0.00419698
ZMYND10	33.4486	-1.75539	0.389248	-4.50968	6.49e-06	0.000239036
SYCP3	0.441353	-1.74858	0.787725	-2.21979	0.0264333	0.0815813
ATP1A2	64.2403	-1.74372	0.583354	-2.98913	0.00279777	0.016529
MYOM2	63.5234	-1.74286	0.369001	-4.72319	2.32e-06	0.000119915
STMN4	0.905058	-1.74148	0.709564	-2.45429	0.0141164	0.0517647
SELE	367.94	-1.73902	0.447253	-3.88823	0.000100977	0.00160157
NAT2	1.43819	-1.73833	0.627255	-2.77133	0.00558277	0.0267143
OXER1	59.2535	-1.7368	0.296468	-5.85832	4.68e-09	1.59e-06
EEF1A2	245.33	-1.73541	0.585807	-2.96243	0.00305224	0.0175487
ITIH4	72.6126	-1.7297	0.355689	-4.86295	1.16e-06	7.56e-05
C17orf66	0.960661	-1.72893	0.634491	-2.72491	0.00643189	0.0295191
MYO16	11.7812	-1.7245	0.483038	-3.57011	0.000356827	0.0039675
RSPH1	20.017	-1.72016	0.449721	-3.82494	0.000130802	0.00194287
TMPRSS3	151.915	-1.71599	0.437017	-3.92661	8.62e-05	0.00143278
COL23A1	186.241	-1.71313	0.451536	-3.79401	0.000148236	0.00211421
LOC389634	6.247	-1.71254	0.435881	-3.92892	8.53e-05	0.00142873
LOC440925	11.1833	-1.7122	0.454282	-3.76901	0.000163894	0.00227306
PON3	113.045	-1.71218	0.481752	-3.55406	0.000379338	0.00413486
MTUS2	12.4101	-1.71054	0.55663	-3.07302	0.00211901	0.0135752
SMTNL2	31.7521	-1.70713	0.635825	-2.6849	0.00725507	0.0320867
CASQ2	34.2766	-1.70686	0.537701	-3.17436	0.00150167	0.010647
C1orf114	2.12178	-1.70392	0.513653	-3.31726	0.000909045	0.00755546
PHKG1	7.69159	-1.70347	0.388703	-4.38244	1.17e-05	0.000370352
MPO	6.55081	-1.70213	0.510938	-3.33137	0.000864187	0.00732203
C1orf200	1.69276	-1.70177	0.602314	-2.82539	0.00472229	0.0237251
KIR2DL1	2.11823	-1.70147	0.713729	-2.38392	0.0171295	0.0594829
NCRNA00185	19.6622	-1.70136	0.450639	-3.77545	0.000159722	0.00223103
CCDC28B	271.876	-1.70038	0.281374	-6.04314	1.51e-09	7.47e-07
SSTR2	99.9297	-1.70024	0.454231	-3.74311	0.000181755	0.00242011
SULT1E1	160.273	-1.69709	0.562129	-3.01904	0.00253576	0.0154104
ATP1A4	1.26967	-1.69567	0.579869	-2.92423	0.0034531	0.0190071
ARHGEF38	2.27533	-1.69459	0.748069	-2.26529	0.023495	0.0747364
HIF3A	41.5706	-1.69323	0.470478	-3.59896	0.000319492	0.00366615
RHOXF1	9.14238	-1.69133	0.666429	-2.53789	0.0111521	0.0435408
KCNC1	7.52274	-1.69124	0.728099	-2.32281	0.0201891	0.0668173
LOC388242	20.4548	-1.68841	0.312046	-5.41078	6.28e-08	9.9e-06
RGS9	36.7067	-1.6851	0.333625	-5.05086	4.4e-07	3.91e-05
NKX2.3	142.679	-1.68473	0.586214	-2.87391	0.00405428	0.0213371
ANO5	11.9891	-1.67894	0.659252	-2.54674	0.0108735	0.0428191
LOC728392	184.613	-1.67708	0.264906	-6.33085	2.44e-10	1.58e-07
COX6B2	137.104	-1.6765	0.424935	-3.94532	7.97e-05	0.00136052
PNMT	7.22139	-1.67492	0.589558	-2.84098	0.00449749	0.0229389
PHYHIPL	32.7288	-1.67406	0.536142	-3.12242	0.00179371	0.0120922
SCN5A	39.2649	-1.67104	0.565921	-2.95277	0.00314932	0.0179066
CCDC8	441.833	-1.67016	0.41147	-4.05901	4.93e-05	0.000957789
PABPC5	9.49517	-1.66955	0.50045	-3.33609	0.000849655	0.00723905
CENPV	136.669	-1.66932	0.35424	-4.71239	2.45e-06	0.00012475
SCARNA7	0.984602	-1.66739	0.689678	-2.41763	0.0156219	0.0555522
C1orf228	13.4899	-1.66238	0.354277	-4.69232	2.7e-06	0.000132425
MSMB	199.447	-1.66063	0.59774	-2.77819	0.00546631	0.0263541
MUC16	595.332	-1.65716	0.476655	-3.47664	0.000507736	0.00503752
PRG4	27.3336	-1.6549	0.420643	-3.93421	8.35e-05	0.00140795
SYCP2L	10.3762	-1.64981	0.631966	-2.6106	0.00903845	0.0375697
CCDC74B	57.7119	-1.64799	0.406631	-4.05279	5.06e-05	0.000971663
LOC150197	2.80285	-1.64545	0.578885	-2.84244	0.00447692	0.0228647
ARRDC2	1241.08	-1.6439	0.243929	-6.73923	1.59e-11	1.82e-08
ALDH8A1	6.6459	-1.64268	0.35289	-4.65495	3.24e-06	0.000150422
C21orf62	1.30555	-1.64157	0.570172	-2.87909	0.00398827	0.0210674
MDS2	1.3501	-1.64154	0.567649	-2.89183	0.00383001	0.0204315
NPB	49.1058	-1.6409	0.481461	-3.40817	0.000654009	0.00600464
GFRA3	37.9829	-1.63979	0.471136	-3.4805	0.000500475	0.00498165
FLJ40292	2.04472	-1.63445	0.533622	-3.06293	0.00219183	0.0139056
DYDC2	10.147	-1.63374	0.445021	-3.67114	0.000241467	0.00298536
MYH3	104.418	-1.6337	0.379006	-4.31049	1.63e-05	0.000453208
FAT3	49.9598	-1.62885	0.521967	-3.12061	0.00180478	0.01213
LOC284749	12.4205	-1.62753	0.502946	-3.23599	0.00121222	0.00918431
IL27	2.37681	-1.62746	0.588852	-2.76378	0.00571364	0.0272174
WNT10B	92.09	-1.62472	0.398008	-4.08211	4.46e-05	0.000899179
KIR3DL2	7.53812	-1.62378	0.48429	-3.35291	0.000799671	0.00693893
PNMA3	64.919	-1.623	0.416497	-3.89678	9.75e-05	0.00156011
SLC16A11	41.202	-1.62032	0.342495	-4.73092	2.24e-06	0.000115973
FOXD3	59.0088	-1.61765	0.361283	-4.47752	7.55e-06	0.000267814
SYNC	330.02	-1.61568	0.38673	-4.17779	2.94e-05	0.000670439
CD79B	286.995	-1.6134	0.398782	-4.04581	5.21e-05	0.000991572
ATP5L2	1.98274	-1.61276	0.441123	-3.65604	0.000256142	0.00313508
SCN11A	3.90032	-1.61135	0.42178	-3.82037	0.000133253	0.00196241
WBSCR28	6.86581	-1.61038	0.549257	-2.93192	0.00336872	0.0187112
C21orf71	1.90936	-1.60942	0.439069	-3.66554	0.00024682	0.00303391
LOC100130933	0.860789	-1.60795	0.69163	-2.32487	0.0200791	0.0665614
CDH4	7.13511	-1.60542	0.689183	-2.32945	0.019835	0.0660075
RLN1	0.952108	-1.60277	0.639536	-2.50615	0.0122055	0.0465837
LOC400043	63.8734	-1.59933	0.280282	-5.70616	1.16e-08	2.9e-06
MMP7	600.603	-1.59926	0.427549	-3.74053	0.000183634	0.00244157
RPL3L	11.0729	-1.5989	0.635904	-2.51438	0.0119242	0.0457866
HOXB13	162.276	-1.59748	0.582873	-2.74069	0.00613101	0.0285455
TIMD4	8.84862	-1.59711	0.631513	-2.52902	0.0114382	0.0443989
RBP3	2.63749	-1.59556	0.628629	-2.53816	0.0111438	0.043519
STXBP6	106.507	-1.59354	0.489017	-3.25867	0.00111937	0.00869175
IL2	0.659295	-1.59036	0.680152	-2.33825	0.0193743	0.0648817
CHST5	3.93489	-1.59028	0.416319	-3.81986	0.000133528	0.00196487
HOXC5	17.4512	-1.58951	0.433886	-3.66344	0.000248851	0.00305401
CLDN9	12.8036	-1.5881	0.495189	-3.20707	0.00134095	0.00985029
SCXB	4.72108	-1.58805	0.392685	-4.04408	5.25e-05	0.000995999
ART5	6.7365	-1.58649	0.661458	-2.39847	0.0164638	0.0577731
HSD17B2	64.4012	-1.58577	0.485037	-3.26937	0.00107788	0.00849288
SLC28A1	1.42609	-1.58463	0.656564	-2.41352	0.0157991	0.0559761
ZNF683	102.767	-1.58444	0.38505	-4.11491	3.87e-05	0.000817839
SYNPO2L	45.948	-1.58121	0.708441	-2.23195	0.0256179	0.0795975
SAA4	11.9632	-1.58094	0.549966	-2.87462	0.00404518	0.0213128
RNASE3	0.664727	-1.58045	0.629709	-2.50981	0.0120795	0.046222
FFAR3	2.27394	-1.57774	0.523365	-3.0146	0.00257318	0.0155553
RPL13AP6	52.7625	-1.57584	0.282868	-5.57092	2.53e-08	5.29e-06
MAPK15	28.6494	-1.57507	0.405846	-3.88095	0.00010405	0.00163196
CARD9	113.689	-1.57492	0.283893	-5.54758	2.9e-08	5.77e-06
C7	204.886	-1.57393	0.670493	-2.34743	0.0189037	0.0637247
MURC	34.1541	-1.57058	0.454691	-3.45417	0.000551995	0.0053383
CLEC4F	4.24221	-1.56661	0.481972	-3.25043	0.00115231	0.00885856
SPOCK2	2213.72	-1.56387	0.353891	-4.41906	9.91e-06	0.00032631
TNFSF11	35.0356	-1.56302	0.366202	-4.26818	1.97e-05	0.000509133
PLAC8L1	1.93021	-1.56293	0.471685	-3.3135	0.000921355	0.00762985
LCN12	7.76606	-1.56276	0.505306	-3.09271	0.0019834	0.0129094
DOK5	26.4677	-1.56192	0.447167	-3.49292	0.000477764	0.00481837
C6orf123	1.57958	-1.56146	0.534296	-2.92246	0.00347275	0.0190839
JSRP1	124.699	-1.56055	0.42806	-3.64563	0.000266741	0.00322605
KCNA2	24.6051	-1.55847	0.662178	-2.35355	0.0185953	0.0629049
FOXD4L6	5.60323	-1.55688	0.440915	-3.53102	0.000413956	0.00436954
HAGHL	130.122	-1.55464	0.361518	-4.3003	1.71e-05	0.000468612
COL9A3	74.8248	-1.55382	0.430857	-3.60635	0.000310531	0.00360354
GABRP	2544.91	-1.55082	0.492378	-3.14965	0.00163468	0.0113121
TPTE2	1.34633	-1.54882	0.702217	-2.20561	0.027411	0.0836797
CBLN3	84.0226	-1.54778	0.26256	-5.89496	3.75e-09	1.32e-06
EYA1	74.0946	-1.54694	0.65465	-2.36301	0.0181274	0.0618265
SPINK2	8.54156	-1.54463	0.46291	-3.33679	0.000847534	0.00722433
APLP1	133.226	-1.54142	0.353561	-4.3597	1.3e-05	0.000388279
AGAP7	18.1486	-1.54114	0.357803	-4.30724	1.65e-05	0.000457149
PTPRN	5.99262	-1.53948	0.527989	-2.91575	0.0035483	0.0193338
NPPC	22.4558	-1.53938	0.682851	-2.25434	0.024175	0.0763038
BMPER	28.8955	-1.53827	0.574436	-2.67789	0.00740883	0.0325368
CYP4B1	363.286	-1.5374	0.493669	-3.11424	0.00184419	0.0123181
RSPH10B2	2.29858	-1.5326	0.511923	-2.99381	0.00275516	0.0163607
SPEF1	6.9482	-1.53216	0.452442	-3.38642	0.000708102	0.00635801
AMDHD1	37.3624	-1.52918	0.487133	-3.13915	0.00169438	0.0116006
TAL2	2.51076	-1.52027	0.649295	-2.34141	0.019211	0.0644881
OXTR	56.1733	-1.51696	0.378565	-4.00713	6.15e-05	0.00112354
CD72	106.787	-1.51432	0.33674	-4.49699	6.89e-06	0.000249559
CXCL13	1072.39	-1.5102	0.348291	-4.33602	1.45e-05	0.000417608
FAM66D	9.20199	-1.50972	0.454073	-3.32484	0.000884686	0.00740892
KLRC3	9.60515	-1.50885	0.462939	-3.25927	0.00111698	0.00868159
CSF2RB	949.656	-1.50869	0.339061	-4.44962	8.6e-06	0.000293703
SLC30A2	2.093	-1.50643	0.636119	-2.36816	0.017877	0.0612893
RGS22	2.04562	-1.50565	0.63132	-2.38492	0.0170829	0.0593886
PALM3	6.40751	-1.50516	0.36338	-4.1421	3.44e-05	0.00075296
KREMEN2	879.715	-1.50012	0.438836	-3.41841	0.00062988	0.00584456
TDRD10	118.298	-1.49723	0.529139	-2.82956	0.00466127	0.0235134
KRT4	9609.33	-1.49683	0.65726	-2.27739	0.0227631	0.072978
TRIM55	7.86252	-1.49566	0.641076	-2.33305	0.0196454	0.0655634
VPREB3	49.0972	-1.49513	0.484961	-3.08298	0.00204937	0.0132494
TNFRSF6B	638.42	-1.49492	0.342557	-4.36401	1.28e-05	0.00038383
GGTLC2	56.6773	-1.4939	0.339874	-4.39544	1.11e-05	0.000354972
NCRNA00085	34.3779	-1.49287	0.260107	-5.73942	9.5e-09	2.68e-06
IL22RA2	42.0145	-1.49122	0.404396	-3.68752	0.000226447	0.00283794
UBE2QL1	122.598	-1.48931	0.436538	-3.41164	0.00064574	0.00594658
RELN	31.2887	-1.4893	0.55131	-2.70139	0.00690505	0.0309222
EYA4	72.0413	-1.48924	0.689773	-2.15904	0.0308474	0.0909702
DNASE1L2	26.0252	-1.48892	0.433943	-3.43113	0.000601072	0.00565451
FAM151A	27.9467	-1.48852	0.594568	-2.50353	0.0122963	0.0468131
C20orf152	0.991245	-1.48788	0.6683	-2.22636	0.0259899	0.0804806
C11orf53	58.9739	-1.48618	0.638501	-2.32761	0.0199331	0.0662689
SLC34A2	455.019	-1.48574	0.593083	-2.50512	0.0122411	0.0466904
CR1L	8.89909	-1.48235	0.45104	-3.28652	0.00101434	0.00814111
RPH3A	0.842704	-1.47998	0.580059	-2.55143	0.0107281	0.042374
ABCA17P	161.627	-1.47784	0.424685	-3.47985	0.000501686	0.004991
WBSCR17	204.662	-1.47745	0.572707	-2.57976	0.00988697	0.0400083
NWD1	61.4299	-1.47641	0.453778	-3.2536	0.00113952	0.00878165
MUSTN1	58.1607	-1.47623	0.41055	-3.59574	0.000323468	0.0036975
TLR10	98.3823	-1.4738	0.447582	-3.2928	0.000991952	0.00802269
MGC16703	21.5404	-1.47229	0.391763	-3.75811	0.000171201	0.00234601
CD19	147.128	-1.47194	0.49719	-2.96052	0.00307123	0.0176192
HOXC4	42.3998	-1.4678	0.329539	-4.45412	8.42e-06	0.000290733
RIMS4	11.7208	-1.46735	0.569546	-2.57635	0.009985	0.0402874
VENTX	10.8696	-1.46554	0.337921	-4.33692	1.44e-05	0.000416551
ATOH8	164.792	-1.46512	0.459853	-3.18605	0.00144228	0.0103338
ASGR2	16.0979	-1.46435	0.353677	-4.14036	3.47e-05	0.000755981
SCG3	4.30181	-1.46293	0.587586	-2.48973	0.012784	0.0481493
SORCS1	6.37239	-1.46022	0.564688	-2.58589	0.00971276	0.0394769
HOXC9	54.0352	-1.45827	0.386606	-3.77197	0.000161962	0.00225342
SOBP	98.4781	-1.45653	0.36538	-3.98634	6.71e-05	0.00120459
MT3	14.8754	-1.4562	0.619703	-2.34984	0.0187815	0.0634076
PEG3	30.7306	-1.45587	0.447866	-3.25068	0.00115131	0.00885455
SYCE1L	18.3805	-1.4547	0.332815	-4.3709	1.24e-05	0.00037875
KCNN2	8.71059	-1.45469	0.379787	-3.83027	0.000128001	0.00191427
MORN3	27.8241	-1.45422	0.345229	-4.21232	2.53e-05	0.000603429
ALDOB	4.39205	-1.45354	0.472231	-3.07803	0.00208377	0.0133962
FCRL2	30.1748	-1.45312	0.507663	-2.86238	0.00420474	0.0219266
RHPN1	249.708	-1.45268	0.271438	-5.35178	8.71e-08	1.22e-05
BLK	81.7851	-1.45242	0.519294	-2.7969	0.00515951	0.0252737
TTTY14	7.58089	-1.45188	0.475366	-3.05424	0.00225631	0.0141822
HSP90AB4P	0.739359	-1.45174	0.669582	-2.16813	0.0301491	0.0895051
IL2RG	2009.78	-1.44657	0.345128	-4.19141	2.77e-05	0.000648342
WSCD1	130.071	-1.44646	0.496003	-2.91622	0.00354297	0.0193104
HLA.DPB2	12.6878	-1.44547	0.424642	-3.40397	0.000664133	0.00606721
LOC284233	11.9549	-1.44547	0.510047	-2.83399	0.00459704	0.0232772
EMR1	22.4062	-1.44481	0.342103	-4.22331	2.41e-05	0.000585403
MYO15A	15.3626	-1.44277	0.345235	-4.1791	2.93e-05	0.000669067
PXT1	0.923535	-1.44237	0.585085	-2.46523	0.0136925	0.0505441
SCARNA10	2.29525	-1.44215	0.562402	-2.56427	0.0103392	0.0412734
LOC134466	13.4765	-1.43871	0.558702	-2.5751	0.010021	0.0403724
ENO3	171.126	-1.43768	0.445684	-3.22577	0.00125634	0.00940588
KCNH8	16.7976	-1.43762	0.613651	-2.34273	0.0191434	0.0643437
CRTAC1	97.333	-1.43675	0.514322	-2.79349	0.00521431	0.0254606
GTSF1L	2.03632	-1.43652	0.436108	-3.29395	0.000987891	0.00801451
DYNLRB2	2.65191	-1.43642	0.483806	-2.96901	0.00298765	0.0172723
ABHD1	3.84753	-1.43297	0.427016	-3.35578	0.000791413	0.0068901
RLN2	5.05063	-1.43177	0.477497	-2.99848	0.00271326	0.0161834
PACSIN1	40.1191	-1.42901	0.369151	-3.87108	0.000108354	0.00168505
C4orf44	1.9703	-1.42719	0.421877	-3.38294	0.00071713	0.00641082
LTC4S	15.6476	-1.42664	0.279065	-5.11219	3.18e-07	3.07e-05
AMPD1	18.3005	-1.42444	0.467177	-3.04903	0.0022958	0.0143664
LOC121952	0.975482	-1.42237	0.662751	-2.14616	0.0318598	0.0930768
ITGAD	8.7078	-1.41612	0.535601	-2.64399	0.00819351	0.035141
LOC84856	313.454	-1.41513	0.500342	-2.82834	0.00467906	0.0235818
CD8B	214.004	-1.41455	0.34846	-4.05944	4.92e-05	0.000957789
EMID1	191.135	-1.41229	0.389461	-3.62627	0.000287539	0.00340131
PPM1E	9.63727	-1.41003	0.39445	-3.57468	0.000350655	0.00392321
LTB	502.825	-1.40798	0.338848	-4.15519	3.25e-05	0.000721442
CD300LG	2.68373	-1.4063	0.575688	-2.44282	0.0145731	0.0528477
TOMM20L	1.06163	-1.40517	0.574775	-2.44473	0.0144962	0.0526728
DLG2	26.3361	-1.40495	0.454552	-3.09085	0.00199585	0.012972
NCF4	296.521	-1.40427	0.245183	-5.72743	1.02e-08	2.79e-06
SPATS1	0.962042	-1.4025	0.655623	-2.13918	0.032421	0.094206
C12orf59	26.3984	-1.40145	0.462054	-3.03308	0.00242072	0.0148789
NCF1B	48.6904	-1.40066	0.309902	-4.5197	6.19e-06	0.000233605
HOXB9	71.8345	-1.40047	0.58334	-2.40078	0.01636	0.0574969
IL1R2	2834.43	-1.40047	0.575811	-2.43217	0.0150085	0.0539887
PRUNE2	161.976	-1.40038	0.472445	-2.96412	0.00303551	0.0174774
BIRC3	1984.07	-1.39862	0.380684	-3.67395	0.000238829	0.00296844
RBM24	16.0662	-1.39847	0.547778	-2.55298	0.0106806	0.0422244
RPS27	107.878	-1.39818	0.24455	-5.71736	1.08e-08	2.81e-06
FAM65C	267.643	-1.39006	0.433522	-3.20644	0.0013439	0.00985201
POU2AF1	1011.96	-1.38776	0.408947	-3.39349	0.000690077	0.00623894
C1QL1	95.4289	-1.38755	0.417193	-3.32592	0.000881261	0.00739529
C8ORFK29	4.77621	-1.38713	0.430331	-3.2234	0.00126679	0.00946614
FHIT	17.6346	-1.38699	0.301202	-4.60484	4.13e-06	0.000176008
TEKT3	2.38044	-1.38477	0.513509	-2.69667	0.00700361	0.0312509
LONRF2	59.7545	-1.38406	0.547405	-2.5284	0.0114582	0.0444439
FLJ37307	1.49479	-1.38175	0.44256	-3.12218	0.0017952	0.0120922
GLOD5	2.07269	-1.38126	0.58271	-2.37041	0.0177682	0.0610284
XIRP1	58.7627	-1.38106	0.472576	-2.92241	0.00347329	0.0190839
PPM1N	63.1201	-1.37938	0.282383	-4.88477	1.04e-06	6.88e-05
DRD4	10.4104	-1.37492	0.370774	-3.70825	0.000208696	0.00267023
ESR1	326.489	-1.37416	0.419484	-3.27583	0.00105352	0.00835122
COLQ	43.7909	-1.37345	0.263053	-5.22118	1.78e-07	2e-05
PPP1R1A	9.11438	-1.3734	0.643091	-2.13562	0.0327102	0.0947009
IL32	3895.56	-1.37331	0.228723	-6.00426	1.92e-09	8.52e-07
SERPIND1	1.61574	-1.37295	0.637942	-2.15215	0.0313857	0.0920513
MSLN	799.242	-1.37207	0.552136	-2.48502	0.0129544	0.0485184
C20orf106	0.705984	-1.36991	0.63156	-2.16908	0.0300766	0.0893332
FLJ26850	1.5464	-1.36827	0.632567	-2.16304	0.0305378	0.0903665
APOC1	986.212	-1.36732	0.384909	-3.55232	0.00038185	0.0041501
H2BFXP	8.66483	-1.36573	0.497167	-2.74703	0.00601371	0.0281794
UCN	4.00618	-1.3653	0.443262	-3.08012	0.0020692	0.0133399
TNFRSF19	412.397	-1.36447	0.352458	-3.87128	0.000108264	0.00168505
LILRA4	26.5828	-1.36226	0.413786	-3.29218	0.000994133	0.00803679
CDHR3	22.4246	-1.3621	0.337686	-4.03363	5.49e-05	0.00103174
CD22	249.773	-1.35906	0.510088	-2.66437	0.00771326	0.0335442
PLA2G10	3.93473	-1.35602	0.449904	-3.01402	0.00257808	0.0155747
C15orf53	1.17811	-1.35506	0.555338	-2.44007	0.0146845	0.0531531
CMYA5	267.053	-1.35489	0.38076	-3.55838	0.000373146	0.00409434
C11orf41	351.775	-1.3547	0.384207	-3.52597	0.000421942	0.00442834
KRT78	867.583	-1.35426	0.492376	-2.75046	0.00595108	0.0280352
LTK	35.9997	-1.35418	0.378739	-3.5755	0.000349553	0.00391548
C17orf76	45.3218	-1.35246	0.290429	-4.65677	3.21e-06	0.000149853
MYBPHL	4.07399	-1.35157	0.53852	-2.50978	0.0120805	0.046222
C2orf50	2.15549	-1.35125	0.534408	-2.52851	0.0114549	0.0444403
NTNG1	4.94898	-1.34758	0.561603	-2.39953	0.0164163	0.0576393
PDE6B	165.265	-1.34745	0.427816	-3.1496	0.00163496	0.0113121
CCDC155	46.3198	-1.34665	0.617203	-2.18186	0.0291201	0.0873281
DNAH7	15.0006	-1.34555	0.415269	-3.24019	0.00119451	0.00908395
SLC14A1	17.4306	-1.34292	0.377651	-3.55599	0.00037656	0.00411813
RFPL3S	6.05708	-1.34276	0.40161	-3.34345	0.00082744	0.00709896
RGL3	9.20893	-1.34262	0.418757	-3.20621	0.00134495	0.00985201
C10orf81	92.9445	-1.3411	0.514005	-2.60913	0.00907734	0.0376886
MT1F	100.355	-1.34069	0.252201	-5.31597	1.06e-07	1.4e-05
WDR93	4.08897	-1.34002	0.389594	-3.43954	0.000582709	0.00554435
SELM	761.932	-1.33789	0.286609	-4.668	3.04e-06	0.000143785
MEF2B	106.958	-1.33758	0.305354	-4.38041	1.18e-05	0.000371682
NCRNA00173	13.4447	-1.33728	0.413599	-3.23328	0.00122377	0.00924167
CYP27A1	1195.11	-1.33698	0.423283	-3.1586	0.00158529	0.0110492
ARRDC5	4.5046	-1.33538	0.384769	-3.47061	0.000519283	0.00513657
C10orf72	456.679	-1.33515	0.376286	-3.54823	0.000387827	0.0041853
TRPC3	5.12699	-1.3317	0.480237	-2.773	0.00555418	0.0266415
CLVS1	5.48125	-1.3303	0.415078	-3.20493	0.00135094	0.00987836
SERPINA1	1026.97	-1.32952	0.302329	-4.3976	1.09e-05	0.000352116
GADD45G	144.585	-1.3281	0.321783	-4.12733	3.67e-05	0.000787006
CYP4F12	249.664	-1.32795	0.47	-2.82543	0.00472177	0.0237251
CHST8	7.60352	-1.32702	0.473535	-2.80236	0.00507301	0.02495
SLCO5A1	31.6998	-1.32209	0.403736	-3.27465	0.00105794	0.00838259
H2AFB1	1.70212	-1.32068	0.424133	-3.11384	0.0018467	0.0123259
NUDT9P1	1.81888	-1.32006	0.458273	-2.88051	0.00397033	0.0210104
P2RX5	129.845	-1.31985	0.294478	-4.482	7.39e-06	0.000263779
STAR	208.339	-1.31859	0.451387	-2.92121	0.00348678	0.0191236
WNT5B	317.204	-1.31644	0.32395	-4.0637	4.83e-05	0.000946139
KCNG1	101.027	-1.31558	0.440176	-2.98876	0.00280111	0.0165352
GAD1	89.3265	-1.31423	0.33453	-3.92858	8.54e-05	0.00142873
LOC100188949	19.0164	-1.31299	0.334574	-3.92437	8.7e-05	0.00143823
CD52	657.358	-1.31283	0.309715	-4.23882	2.25e-05	0.00055673
CEACAM3	8.5686	-1.3126	0.302361	-4.34116	1.42e-05	0.00041227
HLA.DOB	155.365	-1.30807	0.278134	-4.70301	2.56e-06	0.000127377
SEC31B	103.463	-1.30789	0.270998	-4.82619	1.39e-06	8.45e-05
KCNK12	2.88788	-1.30766	0.605581	-2.15934	0.0308237	0.0909191
PTPRCAP	732.964	-1.3063	0.342863	-3.80999	0.000138973	0.00200952
TEX11	2.18778	-1.30478	0.549089	-2.37627	0.0174887	0.0603758
TBC1D10C	320.469	-1.30477	0.320277	-4.07389	4.62e-05	0.000920285
TNNI1	253.365	-1.3031	0.443797	-2.93624	0.00332218	0.0185594
GYPC	380.28	-1.30293	0.26349	-4.9449	7.62e-07	5.59e-05
HLA.DOA	799.455	-1.30289	0.300908	-4.32987	1.49e-05	0.000424896
AS3MT	161.061	-1.30245	0.356929	-3.64904	0.000263221	0.0032025
SIGLEC15	5.2604	-1.30166	0.517105	-2.5172	0.0118291	0.0454975
PDE4B	582.945	-1.30079	0.356598	-3.64778	0.000264518	0.00320975
WFDC2	1369.29	-1.29984	0.439418	-2.95808	0.00309558	0.017709
GRM4	25.7047	-1.2996	0.577404	-2.25076	0.0244004	0.0767808
LGALS2	72.7529	-1.29906	0.427385	-3.03955	0.00236929	0.0146958
MGC16121	10.4304	-1.29679	0.383593	-3.38062	0.000723213	0.0064577
C17orf60	16.2214	-1.29441	0.256165	-5.05302	4.35e-07	3.89e-05
NANOS3	4.12493	-1.29284	0.424948	-3.04234	0.00234746	0.014598
TLE6	11.125	-1.29213	0.338688	-3.8151	0.000136128	0.00198901
FAM107A	120.026	-1.29146	0.332872	-3.87976	0.000104559	0.00163854
TXLNB	51.9211	-1.28982	0.377818	-3.41386	0.000640506	0.00591026
IL27RA	1158.71	-1.28981	0.312061	-4.13321	3.58e-05	0.000768949
CCDC160	7.65967	-1.28941	0.442679	-2.91275	0.00358265	0.0194688
HAAO	113.495	-1.28931	0.265717	-4.85218	1.22e-06	7.73e-05
CYP21A2	11.4502	-1.28916	0.303211	-4.2517	2.12e-05	0.000537268
ISYNA1	1257.29	-1.28882	0.278311	-4.63086	3.64e-06	0.000163642
ADM2	295.809	-1.28858	0.284336	-4.5319	5.85e-06	0.00022282
LYG1	10.8321	-1.28834	0.330623	-3.8967	9.75e-05	0.00156011
PTX3	55.0141	-1.28759	0.545714	-2.35947	0.0183011	0.0622196
HOXC6	110.7	-1.28446	0.392664	-3.27115	0.00107113	0.00846248
MT1M	64.5382	-1.28231	0.430761	-2.97686	0.00291219	0.0169551
IL15	210.718	-1.28154	0.272209	-4.70791	2.5e-06	0.000126061
NAT14	255.73	-1.28127	0.254187	-5.04066	4.64e-07	4.03e-05
C21orf81	1.9622	-1.28095	0.48596	-2.63592	0.00839094	0.0356542
FXYD1	13.7195	-1.27997	0.36964	-3.46274	0.000534704	0.00523457
METRN	180.007	-1.27993	0.28136	-4.54909	5.39e-06	0.000210181
ITGAM	468.786	-1.27847	0.344459	-3.71153	0.000206013	0.00264698
C20orf26	8.21439	-1.27808	0.446271	-2.86391	0.00418449	0.0218585
KLRC2	24.0087	-1.27796	0.454948	-2.80902	0.00496919	0.024558
LOC100233209	35.069	-1.2773	0.309906	-4.12159	3.76e-05	0.000801275
CCL21	877.132	-1.27691	0.464425	-2.74944	0.00596974	0.0280688
KCNK3	8.18503	-1.27582	0.503805	-2.53238	0.0113291	0.0440364
HPD	1.3753	-1.2723	0.514685	-2.472	0.013436	0.0498177
CCDC153	19.9047	-1.27215	0.294306	-4.32253	1.54e-05	0.000437129
TTC25	12.56	-1.27114	0.363215	-3.4997	0.000465787	0.00472617
FCRLA	113.712	-1.27038	0.468697	-2.71046	0.00671903	0.0304372
GATA1	0.848393	-1.26778	0.54656	-2.31957	0.0203641	0.0672749
SLC12A5	6.91748	-1.26744	0.431405	-2.93795	0.00330395	0.0185074
C5orf56	112.459	-1.26595	0.23795	-5.32026	1.04e-07	1.39e-05
ACHE	135.297	-1.26536	0.418221	-3.02556	0.0024817	0.0151572
CXCR4	1952.95	-1.26388	0.293943	-4.29975	1.71e-05	0.000468612
2021-09-01	335.673	-1.26383	0.304581	-4.14941	3.33e-05	0.000735472
CHRNA6	6.85305	-1.26268	0.529123	-2.38637	0.0170158	0.0592676
CRYBB2	3.17224	-1.26188	0.449975	-2.80433	0.00504218	0.0248317
MS4A1	475.094	-1.26083	0.575933	-2.18919	0.0285828	0.0863154
PDZD7	6.54102	-1.25969	0.421024	-2.99196	0.00277193	0.0164317
ADC	134.254	-1.2593	0.269351	-4.67531	2.94e-06	0.000141244
PRCD	11.5201	-1.25846	0.349002	-3.60588	0.000311094	0.00360373
STMN3	898.784	-1.25656	0.328563	-3.82441	0.000131084	0.00194432
MAOB	503.58	-1.25647	0.427396	-2.93982	0.00328399	0.0184416
GPR128	3.86403	-1.25587	0.567797	-2.21183	0.0269782	0.0826474
LYL1	111.993	-1.25577	0.248422	-5.05498	4.3e-07	3.89e-05
A1BG	86.7784	-1.2553	0.249462	-5.03204	4.85e-07	4.16e-05
C5orf40	0.708667	-1.25414	0.591595	-2.11994	0.0340114	0.0974527
RASGRP2	125.622	-1.25285	0.336108	-3.72752	0.000193375	0.00253823
GNLY	487.985	-1.25249	0.331751	-3.77537	0.000159768	0.00223103
C3orf32	4.66924	-1.25229	0.349456	-3.58354	0.000338967	0.00382459
PADI4	4.66338	-1.25095	0.464732	-2.69177	0.00710739	0.0316066
SLC7A9	3.37686	-1.25081	0.476099	-2.6272	0.00860913	0.0362953
DMBX1	28.208	-1.2502	0.559324	-2.23519	0.0254046	0.0790821
C13orf18	125.336	-1.24997	0.299123	-4.1788	2.93e-05	0.000669131
TSPYL5	113.485	-1.24992	0.337873	-3.69939	0.000216119	0.00273982
TMEM198	58.0104	-1.24933	0.292191	-4.27571	1.91e-05	0.000500483
2021-03-10	2.24262	-1.24932	0.527276	-2.36938	0.017818	0.0611672
VSTM2L	143.872	-1.24747	0.501387	-2.48805	0.0128447	0.0483305
BTNL8	1.58711	-1.24476	0.479306	-2.597	0.00940409	0.0385675
TNFSF12.TNFSF13	121.528	-1.24455	0.383525	-3.24503	0.00117437	0.00897173
TTLL9	7.18267	-1.24375	0.29768	-4.17815	2.94e-05	0.000670218
PRODH	1150.72	-1.24341	0.312865	-3.97427	7.06e-05	0.00124941
ICAM2	277.491	-1.2414	0.255939	-4.85036	1.23e-06	7.76e-05
TMEM163	71.0702	-1.24128	0.360662	-3.44167	0.000578139	0.00551518
NCRNA00105	54.7788	-1.24104	0.269364	-4.60729	4.08e-06	0.000175579
RRN3P1	28.3021	-1.23925	0.277462	-4.46638	7.96e-06	0.000279428
FCGR1C	26.0129	-1.23884	0.328767	-3.76814	0.00016447	0.00227589
PBX4	56.6994	-1.23651	0.238948	-5.17483	2.28e-07	2.42e-05
SIGLEC16	5.41821	-1.23536	0.340124	-3.63209	0.000281135	0.00334932
SLC26A9	378.124	-1.23368	0.433095	-2.84852	0.00439227	0.0225771
PNMAL1	104.43	-1.23296	0.505294	-2.44008	0.014684	0.0531531
LST1	170.207	-1.23186	0.252733	-4.87415	1.09e-06	7.21e-05
SNTA1	527.853	-1.23104	0.263739	-4.66766	3.05e-06	0.000143785
ATHL1	715.748	-1.23019	0.266002	-4.62473	3.75e-06	0.000166919
ZNF662	70.5817	-1.22998	0.390702	-3.14814	0.00164315	0.011343
IL18RAP	34.6348	-1.22945	0.290609	-4.23062	2.33e-05	0.000571259
ADRA2B	36.866	-1.2293	0.439995	-2.7939	0.00520763	0.0254415
C22orf15	2.61877	-1.22927	0.518898	-2.369	0.0178362	0.0612016
SLC6A16	23.2241	-1.22803	0.312208	-3.93338	8.38e-05	0.00141135
IDO2	8.15127	-1.22737	0.35083	-3.49847	0.000467935	0.00474011
RNF148	1.5782	-1.22588	0.42016	-2.91765	0.00352677	0.019268
CD3D	335.089	-1.22537	0.310361	-3.9482	7.87e-05	0.00135289
PTCRA	4.67948	-1.22525	0.51618	-2.37368	0.0176118	0.0606066
LOC401052	35.4537	-1.22447	0.247779	-4.94179	7.74e-07	5.61e-05
CCR10	24.0597	-1.22414	0.326544	-3.74878	0.000177696	0.00238941
KCNH2	38.5048	-1.22349	0.437994	-2.79339	0.0052159	0.0254615
PROCA1	25.408	-1.22317	0.213976	-5.71639	1.09e-08	2.81e-06
RARRES1	420.194	-1.22288	0.373989	-3.26982	0.00107614	0.00848649
C9orf24	13.0516	-1.2227	0.476857	-2.56407	0.0103452	0.0412885
PLN	20.1099	-1.22009	0.453416	-2.69089	0.0071262	0.0316749
STK32C	132.234	-1.22	0.263005	-4.63871	3.51e-06	0.000160419
C3orf47	38.4479	-1.21846	0.264134	-4.61302	3.97e-06	0.000172019
C9orf98	102.107	-1.21722	0.387104	-3.14443	0.00166412	0.0114447
TXNDC3	2.24057	-1.21476	0.415943	-2.92049	0.00349482	0.0191562
ALPK2	118.897	-1.21406	0.369656	-3.2843	0.00102236	0.00818912
LOC390595	5.25524	-1.21366	0.28434	-4.26834	1.97e-05	0.000509133
DUSP4	280.954	-1.21326	0.284089	-4.2707	1.95e-05	0.000508827
WTIP	140.63	-1.21245	0.241283	-5.02501	5.03e-07	4.23e-05
NPFF	8.98353	-1.21207	0.300429	-4.03446	5.47e-05	0.00103127
MYOM1	44.4532	-1.21154	0.341779	-3.5448	0.00039291	0.0042178
GKAP1	78.1038	-1.21141	0.223701	-5.41529	6.12e-08	9.84e-06
MSC	279.745	-1.21125	0.322413	-3.75682	0.000172084	0.00234933
CCNI2	69.6365	-1.21002	0.424463	-2.8507	0.00436232	0.0224735
TMEM125	141.538	-1.20979	0.298566	-4.05199	5.08e-05	0.000972961
IL12A	20.596	-1.20948	0.347317	-3.48236	0.000497006	0.00495519
RDH5	35.1134	-1.2094	0.250981	-4.81869	1.45e-06	8.63e-05
LOC644165	9.51669	-1.2086	0.377059	-3.20533	0.00134907	0.00987433
LOC388588	14.9218	-1.20826	0.334659	-3.61043	0.000305692	0.00356771
ACBD7	179.798	-1.20495	0.337245	-3.57293	0.000353008	0.00393017
NCRNA00092	17.6943	-1.20385	0.49375	-2.43818	0.0147614	0.0532985
TEX14	5.67	-1.20305	0.334011	-3.60182	0.000315996	0.00364029
CATSPER1	4.65287	-1.20211	0.316976	-3.79244	0.000149176	0.0021219
CRIP1	2133.23	-1.20181	0.267263	-4.49672	6.9e-06	0.000249559
STAP1	33.461	-1.20177	0.42873	-2.8031	0.0050614	0.0248996
AMH	38.3933	-1.20175	0.48324	-2.48686	0.0128874	0.0483806
LOC401431	29.4037	-1.20158	0.29945	-4.01263	6e-05	0.00110094
DGCR5	51.7835	-1.19812	0.453122	-2.64414	0.00818977	0.0351336
FLJ36777	1.53757	-1.19769	0.499978	-2.39548	0.0165985	0.0581233
C1orf127	4.55644	-1.19662	0.44489	-2.6897	0.00715159	0.0317531
ST20	60.9231	-1.19599	0.196726	-6.0795	1.21e-09	6.14e-07
LIME1	328.84	-1.19596	0.262504	-4.55596	5.21e-06	0.000207401
KCNK9	3.12138	-1.19569	0.510877	-2.34046	0.0192598	0.0646045
TTLL10	5.69473	-1.19518	0.433321	-2.75819	0.00581223	0.027551
KCNT2	12.9261	-1.19491	0.404676	-2.95274	0.00314964	0.0179066
MICAL1	692.117	-1.19429	0.222942	-5.35696	8.46e-08	1.21e-05
RNF207	268.288	-1.19429	0.235286	-5.0759	3.86e-07	3.54e-05
MCART6	19.4601	-1.19292	0.300746	-3.96655	7.29e-05	0.00127575
NUDT10	45.1969	-1.19268	0.442726	-2.69395	0.00706114	0.031417
MIR155HG	42.0053	-1.19157	0.317427	-3.75384	0.000174145	0.00237042
RGS10	685.878	-1.18995	0.172896	-6.88248	5.88e-12	9.8e-09
C17orf99	21.9332	-1.18964	0.375655	-3.16684	0.00154105	0.0108231
MYO1A	3.05827	-1.18934	0.36849	-3.2276	0.00124835	0.00937672
LOC286367	28.8454	-1.18909	0.264601	-4.49392	6.99e-06	0.000251963
SYT6	2.87562	-1.18884	0.40919	-2.90536	0.00366836	0.0197763
RPL31P11	4.15744	-1.18797	0.358918	-3.30987	0.000933395	0.00771314
RSPO3	33.2728	-1.18797	0.396449	-2.99652	0.00273081	0.0162563
KLHDC7B	1226.98	-1.18723	0.465394	-2.55103	0.0107406	0.0424052
C14orf50	5.38408	-1.18652	0.387491	-3.06205	0.00219829	0.0139418
GMFG	367.703	-1.18592	0.246065	-4.81955	1.44e-06	8.62e-05
CD79A	921.485	-1.18576	0.434231	-2.73072	0.00631953	0.0291273
NPIPL3	635.637	-1.18574	0.267449	-4.43354	9.27e-06	0.000311865
SLIT1	23.2283	-1.18537	0.398465	-2.97483	0.00293147	0.0170156
P2RX1	38.6289	-1.18504	0.30225	-3.92074	8.83e-05	0.00145036
HYI	271.356	-1.18489	0.174181	-6.80265	1.03e-11	1.45e-08
BCAS4	797.259	-1.18452	0.202961	-5.83617	5.34e-09	1.72e-06
PKD2L1	3.96242	-1.18378	0.393663	-3.00709	0.00263758	0.0158458
FAM71E1	66.1098	-1.18374	0.255759	-4.62835	3.69e-06	0.000164834
JAK3	786.761	-1.18245	0.25954	-4.55596	5.21e-06	0.000207401
WBSCR26	9.21527	-1.18242	0.423402	-2.79268	0.00522735	0.0255039
SFRS13B	33.339	-1.18226	0.333017	-3.55016	0.000384995	0.00416453
CORT	12.9046	-1.18176	0.282056	-4.18981	2.79e-05	0.000651272
CHRNA3	27.9801	-1.18039	0.451619	-2.61369	0.00895696	0.0373156
C17orf104	50.9132	-1.18014	0.425723	-2.77209	0.00556977	0.026682
CDHR5	1.88219	-1.17953	0.551693	-2.13802	0.0325153	0.0944201
RGAG4	132.35	-1.17951	0.327414	-3.6025	0.000315176	0.00364029
DOK7	61.2753	-1.17843	0.451325	-2.61104	0.0090268	0.0375383
ZNF239	48.6453	-1.17833	0.269775	-4.36783	1.25e-05	0.000381018
FCGR1B	76.5522	-1.17761	0.316174	-3.72458	0.000195644	0.0025495
C2orf48	22.223	-1.17756	0.347907	-3.38471	0.000712535	0.0063792
GZMH	205.302	-1.17674	0.390149	-3.01612	0.0025603	0.0155051
SNHG9	38.632	-1.17661	0.281399	-4.18128	2.9e-05	0.000668131
ADCY5	100.541	-1.17604	0.497252	-2.36508	0.0180262	0.0615818
CCL19	919.063	-1.17581	0.493285	-2.38362	0.0171431	0.0594931
POPDC3	57.6839	-1.17577	0.54571	-2.15457	0.0311958	0.0916625
GRIA4	1.46785	-1.17526	0.55103	-2.13285	0.0329372	0.0952379
TMPRSS6	6.75193	-1.17496	0.347735	-3.37889	0.000727781	0.0064839
NECAB1	78.7065	-1.17457	0.402179	-2.92052	0.00349449	0.0191562
CCDC78	42.4516	-1.17412	0.360816	-3.25407	0.00113763	0.00877511
ATF5	2662.95	-1.17045	0.270903	-4.32056	1.56e-05	0.000440355
CCDC17	12.9078	-1.16925	0.308423	-3.79106	0.000150009	0.00212793
LOC729156	3.4405	-1.16885	0.387541	-3.01608	0.00256065	0.0155051
C10orf79	14.9392	-1.16884	0.406908	-2.8725	0.00407233	0.021425
TRAF2	1669.22	-1.16822	0.232307	-5.0288	4.94e-07	4.2e-05
VASH2	79.2648	-1.16799	0.349105	-3.34566	0.000820867	0.00707265
FOXD4L2	6.07326	-1.16674	0.368407	-3.16698	0.0015403	0.0108231
CEACAM4	10.5283	-1.16643	0.328193	-3.5541	0.000379281	0.00413486
MST1P9	18.1959	-1.16616	0.3386	-3.44407	0.000573034	0.00548647
IL4I1	472.005	-1.16615	0.264367	-4.41112	1.03e-05	0.000335914
LY86	100.967	-1.16568	0.291316	-4.00142	6.3e-05	0.00114756
RNF175	23.7448	-1.16561	0.36247	-3.21574	0.00130108	0.00964632
AIF1	448.71	-1.16532	0.245442	-4.74785	2.06e-06	0.000110701
ZNF454	9.01527	-1.16499	0.446833	-2.60721	0.00912844	0.0378323
MYB	348.281	-1.16454	0.330419	-3.52443	0.000424393	0.00444563
LRRN1	237.347	-1.16446	0.509782	-2.28423	0.0223581	0.0719944
ASPHD1	69.3659	-1.16419	0.311738	-3.73453	0.00018807	0.00248612
CD37	636.663	-1.1641	0.329109	-3.53713	0.000404493	0.00430684
FAM18A	23.4384	-1.16377	0.25089	-4.63856	3.51e-06	0.000160419
C17orf72	22.2096	-1.16308	0.275056	-4.22854	2.35e-05	0.000574251
SCUBE1	18.8068	-1.16266	0.327323	-3.55203	0.000382268	0.00415034
C9orf66	10.0059	-1.16043	0.36465	-3.18233	0.00146096	0.0104199
WBP2NL	3.12504	-1.16017	0.428213	-2.70933	0.00674195	0.0304918
GZMB	473.511	-1.15959	0.322645	-3.594	0.000325641	0.00370847
FITM1	15.3135	-1.15922	0.288019	-4.02479	5.7e-05	0.00105695
HCG26	114.981	-1.15905	0.27281	-4.24856	2.15e-05	0.000541868
FAM189A2	165.976	-1.15784	0.479099	-2.41671	0.0156617	0.0556594
ABP1	92.7974	-1.15697	0.373102	-3.10094	0.00192908	0.0126703
EIF1AY	448.156	-1.1568	0.39162	-2.95389	0.00313798	0.0178735
NCRNA00204B	6.1915	-1.15674	0.326176	-3.54637	0.000390571	0.004205
SV2B	228.953	-1.15637	0.529776	-2.18276	0.0290537	0.0872848
NAT8L	5.87574	-1.15585	0.452027	-2.55703	0.0105569	0.0418421
PPIAL4D	1.76168	-1.15537	0.374937	-3.0815	0.0020596	0.0132921
NCF1C	69.3303	-1.15463	0.301763	-3.82629	0.000130087	0.00193757
GZMM	80.2294	-1.1535	0.354188	-3.25674	0.00112699	0.00872978
CCDC42B	15.5555	-1.15294	0.30706	-3.75477	0.000173498	0.0023657
ANKRD19	132.656	-1.15125	0.230795	-4.98819	6.09e-07	4.86e-05
FAM186A	3.75915	-1.15102	0.394975	-2.91417	0.00356638	0.0194092
KLHL30	19.1461	-1.15092	0.487027	-2.36315	0.0181201	0.0618222
RRN3P2	10.3119	-1.15053	0.232068	-4.95772	7.13e-07	5.36e-05
RAMP1	365.714	-1.1502	0.3974	-2.89432	0.00379982	0.020306
FAM47E	10.3437	-1.14994	0.341331	-3.36899	0.000754441	0.00666822
TMPRSS5	3.67225	-1.14923	0.412104	-2.78869	0.00529217	0.0257698
C13orf16	1.53964	-1.14825	0.48356	-2.37458	0.0175689	0.0605498
HRASLS5	3.71894	-1.14765	0.468534	-2.44945	0.0143073	0.0522157
TTC23L	4.52413	-1.14577	0.331698	-3.45425	0.00055183	0.0053383
KLRB1	84.0967	-1.14289	0.33059	-3.45712	0.000545982	0.00530222
PHOSPHO1	17.7587	-1.14261	0.361715	-3.15886	0.00158385	0.011046
ADCYAP1	14.445	-1.14211	0.443292	-2.57642	0.00998285	0.0402874
SLC45A1	17.234	-1.14197	0.294722	-3.87474	0.000106736	0.00166554
FLJ12825	6.0702	-1.14187	0.43395	-2.63134	0.00850491	0.03598
DPYSL4	31.516	-1.14148	0.43036	-2.65238	0.00799277	0.0344574
BAI2	231.526	-1.14036	0.344831	-3.30701	0.000942971	0.00777129
HPX	5.00906	-1.13876	0.399309	-2.85183	0.00434685	0.0224253
TMEM155	6.65088	-1.13799	0.437398	-2.60174	0.00927535	0.0382251
ZMYND15	75.51	-1.13793	0.210066	-5.41704	6.06e-08	9.84e-06
C19orf77	5.65516	-1.13749	0.433766	-2.62236	0.00873225	0.0366878
IL23A	112.313	-1.13736	0.307333	-3.70074	0.000214969	0.00272955
LOC728875	23.6457	-1.13648	0.265398	-4.28216	1.85e-05	0.000493246
LDOC1	407.304	-1.13523	0.344728	-3.2931	0.000990875	0.00802269
ACAP1	389.448	-1.1345	0.281469	-4.03062	5.56e-05	0.00103971
C9orf139	6.19427	-1.134	0.347065	-3.26741	0.00108537	0.00852627
APOE	4397.06	-1.13395	0.356894	-3.17729	0.0014866	0.0105687
RPL39	553.693	-1.13336	0.261022	-4.34201	1.41e-05	0.000411544
FHL1	746.626	-1.13237	0.373518	-3.03163	0.0024324	0.0149407
ZAP70	305.884	-1.13192	0.308789	-3.66566	0.000246703	0.00303391
C1orf88	18.862	-1.12953	0.502667	-2.24707	0.0246355	0.0773445
DHDH	36.6324	-1.12942	0.290489	-3.88799	0.000101079	0.00160171
N4BP2L1	191.879	-1.12637	0.206347	-5.45861	4.8e-08	8.34e-06
EGOT	9.46943	-1.12474	0.357013	-3.15042	0.00163036	0.011293
LOC96610	57761.9	-1.12235	0.408396	-2.74819	0.00599251	0.0281292
SCARNA2	6.03972	-1.12201	0.442836	-2.5337	0.0112867	0.0439365
HCST	203.341	-1.12063	0.299856	-3.73721	0.000186074	0.00246865
SLC35F3	19.9363	-1.12058	0.505756	-2.21565	0.0267155	0.0821032
TMIGD2	23.8817	-1.12034	0.360185	-3.11047	0.00186793	0.0123954
TRAF3IP3	225.425	-1.11988	0.262136	-4.27212	1.94e-05	0.000507148
KRT86	61.7836	-1.11902	0.310417	-3.6049	0.000312275	0.00361462
FCGR1A	85.4831	-1.11806	0.32405	-3.45026	0.000560038	0.0053829
GRID2IP	8.03496	-1.11799	0.273446	-4.08853	4.34e-05	0.000883408
GNAZ	75.098	-1.11796	0.333783	-3.34937	0.000809957	0.00700168
ABCA3	1906.97	-1.11745	0.494675	-2.25896	0.023886	0.0755999
PDCD1	140.435	-1.116	0.317504	-3.51492	0.000439891	0.00454374
NOVA1	44.9948	-1.11597	0.489884	-2.27803	0.0227248	0.072919
PKIG	463.419	-1.11551	0.258219	-4.32	1.56e-05	0.000440795
RTDR1	7.98283	-1.11523	0.44131	-2.52708	0.0115015	0.0445458
APOBEC3H	26.1507	-1.11502	0.280532	-3.97464	7.05e-05	0.00124863
CYP2D6	27.8465	-1.11455	0.328793	-3.38981	0.000699416	0.00630471
RPL21	2.75952	-1.11431	0.352684	-3.15952	0.00158031	0.0110339
RPS27L	715.06	-1.11421	0.130289	-8.55185	1.21e-17	1.82e-13
IL11RA	179.604	-1.11333	0.212724	-5.2337	1.66e-07	1.92e-05
AMICA1	335.679	-1.11286	0.279447	-3.98235	6.82e-05	0.00122061
SPATC1	3.71483	-1.11233	0.422708	-2.63143	0.00850264	0.03598
SLC25A41	10.8785	-1.11197	0.462337	-2.40511	0.0161677	0.0569957
TNFRSF14	1115.15	-1.11116	0.187051	-5.94039	2.84e-09	1.13e-06
KCNMB4	46.3253	-1.10992	0.312275	-3.5543	0.00037898	0.00413486
HLA.DMA	1597.63	-1.10863	0.239298	-4.63287	3.61e-06	0.000162864
LOC729234	34.3893	-1.10688	0.261119	-4.23899	2.25e-05	0.00055673
C10orf95	14.0095	-1.1066	0.258361	-4.28316	1.84e-05	0.000491751
MNX1	13.5638	-1.10533	0.438603	-2.52011	0.0117318	0.0452158
BATF	204.114	-1.10502	0.264791	-4.17317	3e-05	0.000681644
ACRV1	2.66884	-1.10376	0.375569	-2.93889	0.0032939	0.018469
ITGB1BP2	13.8365	-1.10356	0.370722	-2.97678	0.00291293	0.0169551
CCL3L1	31.4705	-1.10287	0.319359	-3.45337	0.00055363	0.00534534
NUPR1	2106.83	-1.10277	0.253282	-4.35391	1.34e-05	0.000393572
PIWIL4	45.7885	-1.10262	0.335114	-3.29029	0.00100083	0.00806956
KIRREL3	6.56964	-1.10212	0.473026	-2.32994	0.0198094	0.0659654
C17orf55	4.53259	-1.10138	0.454705	-2.42218	0.0154275	0.0550961
ENPP3	5.95542	-1.09959	0.453493	-2.4247	0.0153208	0.0548755
RAB42	89.7647	-1.09937	0.362946	-3.02902	0.00245348	0.0150202
TMEM74	13.9625	-1.09831	0.41908	-2.62077	0.00877315	0.0367639
NCF1	231.088	-1.09779	0.312793	-3.50963	0.000448724	0.00460659
MYRIP	16.5087	-1.09767	0.444024	-2.4721	0.0134322	0.049814
TCP10L	7.98021	-1.09764	0.279792	-3.92306	8.74e-05	0.00144091
AMPH	29.1503	-1.09764	0.40859	-2.6864	0.00722271	0.0319876
TMEM61	25.1651	-1.0966	0.415188	-2.64121	0.00826096	0.03529
GLRB	32.2321	-1.09553	0.403015	-2.71833	0.00656122	0.0299105
EGFL8	79.554	-1.09473	0.256346	-4.27052	1.95e-05	0.000508827
KCNA6	10.244	-1.09463	0.49042	-2.23202	0.0256138	0.0795975
C9orf116	44.7523	-1.09441	0.239257	-4.57421	4.78e-06	0.0001941
RIC3	49.2069	-1.09388	0.378695	-2.88856	0.00387008	0.0205854
HLA.DMB	1447.68	-1.09386	0.261159	-4.18849	2.81e-05	0.000654214
CTRL	15.3257	-1.09333	0.242937	-4.50048	6.78e-06	0.000246653
MATN1	1.99908	-1.09316	0.420202	-2.60152	0.00928119	0.038232
NA..28	5.88657	-1.09298	0.373288	-2.92799	0.00341159	0.018864
NRN1L	2.07285	-1.09222	0.434574	-2.5133	0.0119608	0.0458884
TEKT5	2.13072	-1.09186	0.465036	-2.34791	0.0188789	0.0636531
HLA.DPB1	4714.34	-1.09167	0.254861	-4.28337	1.84e-05	0.000491751
MMEL1	3.6819	-1.09155	0.504134	-2.16519	0.0303729	0.0900528
TMSB15B	71.2531	-1.09085	0.391967	-2.78302	0.00538555	0.0260745
LOC643719	2.74916	-1.09002	0.386587	-2.8196	0.00480838	0.0239961
FXYD7	4.4709	-1.08938	0.412178	-2.64299	0.00821783	0.0352124
GPT	55.8446	-1.08848	0.334064	-3.2583	0.00112082	0.00869296
FMO1	181.982	-1.08847	0.414985	-2.62292	0.00871793	0.0366445
CD74	61016.8	-1.08816	0.264271	-4.1176	3.83e-05	0.000810535
FAM179A	25.4904	-1.08813	0.326935	-3.32827	0.000873874	0.00737152
ARNT2	937.56	-1.08734	0.427766	-2.5419	0.0110253	0.043231
CYorf15B	133.515	-1.08715	0.408046	-2.66429	0.00771507	0.0335442
SNCG	425.346	-1.08619	0.389031	-2.79205	0.00523756	0.0255356
MBL1P	1.39622	-1.08581	0.503906	-2.15478	0.0311791	0.0916431
CXCR5	120.623	-1.0854	0.481855	-2.25255	0.0242873	0.0765529
XCL2	22.0612	-1.08533	0.340163	-3.19061	0.00141971	0.0102195
HES6	374.096	-1.08521	0.284661	-3.81228	0.000137688	0.00199724
SPNS3	15.7471	-1.08491	0.29937	-3.62397	0.000290115	0.00342736
LOXL4	429.884	-1.08466	0.444502	-2.44018	0.01468	0.0531531
TRIM46	33.3904	-1.08388	0.217012	-4.99458	5.9e-07	4.76e-05
KIAA1984	3.86381	-1.08313	0.34292	-3.15856	0.00158552	0.0110492
SAA1	793.912	-1.08274	0.440673	-2.45702	0.0140096	0.0514042
MGAT3	959.617	-1.08226	0.493329	-2.1938	0.0282498	0.0855944
RDM1	29.918	-1.08081	0.31804	-3.39833	0.000677986	0.00615999
ATOX1	914.998	-1.08067	0.195673	-5.52283	3.34e-08	6.24e-06
TTC21A	43.1711	-1.0798	0.193134	-5.59093	2.26e-08	4.89e-06
NCRNA00176	36.5539	-1.07773	0.339975	-3.17002	0.00152427	0.010749
LOC257358	1.33029	-1.07753	0.433401	-2.48622	0.012911	0.0484195
KLHL32	4.98193	-1.07539	0.500291	-2.14953	0.0315924	0.0924871
SNHG12	394.121	-1.07524	0.232277	-4.6291	3.67e-06	0.000164638
SMPDL3B	250.121	-1.07507	0.302712	-3.55145	0.000383122	0.00415475
ABCB4	19.946	-1.07486	0.323995	-3.31753	0.000908184	0.00755172
GALNTL1	43.1314	-1.07429	0.429306	-2.50238	0.012336	0.0468867
PCSK1N	9.16371	-1.07331	0.490957	-2.18616	0.0288036	0.0867468
LOC375190	26.6101	-1.07255	0.201067	-5.33428	9.59e-08	1.31e-05
SH3BP5	1081.65	-1.07207	0.278593	-3.84815	0.000119015	0.00180606
HAMP	12.3588	-1.07203	0.453546	-2.36366	0.0180956	0.06175
CLNK	2.64574	-1.07203	0.414303	-2.58754	0.00966642	0.0393241
LPAL2	4.95481	-1.07032	0.354365	-3.0204	0.00252438	0.0153667
C20orf134	71.3186	-1.06921	0.242505	-4.40903	1.04e-05	0.000338151
RND2	52.0211	-1.06843	0.349091	-3.06062	0.00220879	0.0139944
CHI3L1	1589.1	-1.06806	0.413584	-2.58244	0.00981047	0.0397612
ENPP2	446.828	-1.06667	0.303497	-3.5146	0.000440412	0.00454374
C2orf74	118.355	-1.06647	0.281481	-3.7888	0.000151379	0.00213831
PRRX1	2107.22	-1.06553	0.341879	-3.1167	0.00182887	0.0122515
KLF1	3.39008	-1.06509	0.328497	-3.24231	0.00118563	0.00902391
LOC115110	72.5454	-1.06495	0.240639	-4.4255	9.62e-06	0.000320179
ZGLP1	29.4272	-1.06484	0.311355	-3.42002	0.000626157	0.00582441
BFSP2	6.01856	-1.06425	0.471837	-2.25555	0.0240991	0.0761428
C19orf60	532.696	-1.06409	0.192207	-5.53618	3.09e-08	5.96e-06
PATL2	16.5448	-1.06351	0.293597	-3.62235	0.000291936	0.00344256
CHST13	7.09078	-1.06257	0.402742	-2.63833	0.00833149	0.0354756
LOC339674	10.3777	-1.06235	0.324014	-3.27871	0.00104283	0.0082987
DSCR6	97.1531	-1.06202	0.363069	-2.92512	0.00344319	0.0189665
RMRP	26.1213	-1.06115	0.433229	-2.44939	0.0143099	0.0522157
NAPSB	294.124	-1.06093	0.330316	-3.21185	0.00131884	0.0097504
FIGF	8.48986	-1.06076	0.377403	-2.81068	0.00494374	0.0244718
LOC256880	3.63878	-1.05993	0.296445	-3.57548	0.000349585	0.00391548
RANBP17	117.075	-1.0598	0.342105	-3.09789	0.00194905	0.0127765
FBXO2	448.698	-1.05963	0.357717	-2.9622	0.00305446	0.0175505
SH2D4B	9.44364	-1.05921	0.39233	-2.6998	0.00693818	0.0310424
C6orf154	25.0289	-1.05826	0.327218	-3.23412	0.0012202	0.0092257
C10orf10	1281.24	-1.05782	0.268818	-3.93508	8.32e-05	0.00140634
CSF2RA	178.319	-1.05722	0.238015	-4.44181	8.92e-06	0.000301923
CCDC62	2.56122	-1.05518	0.391211	-2.69722	0.00699211	0.0312286
AGER	62.8564	-1.0541	0.249001	-4.23333	2.3e-05	0.000565926
HTR1F	3.87567	-1.05375	0.484258	-2.17602	0.029554	0.0882816
GOLGA8B	286.595	-1.0536	0.280322	-3.75852	0.000170922	0.00234567
SNX22	207.431	-1.05338	0.183153	-5.75136	8.85e-09	2.62e-06
TREML1	4.43897	-1.05336	0.446163	-2.36094	0.0182287	0.0620657
RASSF4	620.895	-1.05261	0.241157	-4.36483	1.27e-05	0.000383464
RTN4RL1	242.187	-1.05172	0.456258	-2.3051	0.0211607	0.0692701
C11orf21	17.0598	-1.05163	0.34316	-3.06455	0.00218	0.0138642
BEND7	59.5797	-1.05061	0.427574	-2.45714	0.0140047	0.0513962
C8orf4	1708.75	-1.0501	0.429517	-2.44484	0.0144918	0.0526728
EDA2R	14.2205	-1.04943	0.345026	-3.04159	0.00235336	0.0146218
FAM173A	166.132	-1.04893	0.21056	-4.98161	6.31e-07	4.95e-05
TMEM136	48.8049	-1.04885	0.239993	-4.37034	1.24e-05	0.000379081
SAA2	300.526	-1.04874	0.42405	-2.47315	0.0133929	0.0497083
CCDC81	6.12323	-1.04797	0.285902	-3.66547	0.000246883	0.00303391
FER1L4	81.6933	-1.04659	0.294516	-3.55361	0.000379984	0.00413717
MAK	16.3946	-1.04622	0.365541	-2.86211	0.00420836	0.0219392
BZRAP1	285.27	-1.04613	0.282321	-3.70545	0.000211017	0.00268719
SPAG4	86.768	-1.0457	0.24823	-4.21264	2.52e-05	0.000603429
NPDC1	443.955	-1.04559	0.238762	-4.37922	1.19e-05	0.000372019
GREB1	44.5698	-1.04531	0.336384	-3.10748	0.0018869	0.0124806
KIAA0125	101.85	-1.04476	0.449681	-2.32334	0.020161	0.0667724
WFDC3	9.07846	-1.04333	0.418236	-2.49461	0.0126097	0.0476502
KIAA1529	55.676	-1.04328	0.273143	-3.81955	0.000133697	0.00196579
KLRK1	152.44	-1.04208	0.335964	-3.10175	0.0019238	0.0126562
TESC	97.6894	-1.04118	0.395333	-2.63367	0.00844676	0.0358499
C16orf79	35.791	-1.0405	0.303571	-3.42755	0.000609064	0.0057092
C12orf42	2.23393	-1.04027	0.484685	-2.14629	0.0318499	0.0930627
DCST2	34.1499	-1.03987	0.311636	-3.3368	0.000847483	0.00722433
HVCN1	239.091	-1.03966	0.299849	-3.46727	0.000525776	0.00516896
ME3	82.4505	-1.03946	0.315465	-3.295	0.000984207	0.00800596
GZMK	189.848	-1.0392	0.384746	-2.70099	0.00691332	0.0309387
CATSPER3	10.9434	-1.03883	0.229166	-4.53306	5.81e-06	0.000222065
SMTNL1	10.9784	-1.038	0.452639	-2.29323	0.0218348	0.0707729
PRDM16	22.4615	-1.03748	0.362237	-2.8641	0.0041819	0.0218585
RAB33A	33.0583	-1.03653	0.257901	-4.0191	5.84e-05	0.00107606
PRKCQ	158.525	-1.03565	0.275227	-3.76289	0.000167963	0.00231549
E2F1	1420.79	-1.03497	0.2307	-4.48623	7.25e-06	0.000259608
COL9A2	729.463	-1.03482	0.338112	-3.06057	0.00220917	0.0139944
C20orf96	135.486	-1.03454	0.21418	-4.83024	1.36e-06	8.31e-05
FLJ40330	73.6678	-1.0344	0.326376	-3.16934	0.00152785	0.0107634
RAB9B	5.91588	-1.03376	0.484983	-2.13155	0.0330443	0.0955023
GLT1D1	17.6509	-1.03263	0.332281	-3.1077	0.00188552	0.012476
CCDC13	5.76162	-1.03208	0.324868	-3.17692	0.00148849	0.010574
C11orf66	12.2096	-1.03114	0.25428	-4.05514	5.01e-05	0.000968019
MGC29506	1035.75	-1.03066	0.41077	-2.50909	0.0121044	0.0462942
GAPT	35.6083	-1.02841	0.359255	-2.86263	0.00420147	0.0219158
LOC646851	25.4591	-1.02823	0.29192	-3.5223	0.000427827	0.00445947
C15orf27	21.0578	-1.02763	0.316207	-3.24986	0.00115463	0.0088668
DNAH6	13.9822	-1.02595	0.447828	-2.29095	0.0219666	0.071058
PRR15L	145.242	-1.02593	0.408722	-2.51009	0.0120699	0.0462006
HSPB8	1946.56	-1.02482	0.371375	-2.75953	0.00578851	0.0274598
SLC3A1	2.86797	-1.02421	0.399535	-2.56351	0.0103618	0.0413338
SPAG8	9.33358	-1.02104	0.345614	-2.95428	0.00313404	0.0178566
GPR120	5.80417	-1.02055	0.386161	-2.64281	0.00822209	0.0352225
FAM159A	22.7519	-1.01917	0.291001	-3.50228	0.000461293	0.00469879
BTN2A2	415.183	-1.01895	0.251541	-4.05084	5.1e-05	0.0009747
DMD	645.499	-1.01816	0.379544	-2.68259	0.00730534	0.0322134
ICA1	227.861	-1.01816	0.299084	-3.40427	0.000663407	0.00606721
RENBP	185.123	-1.01797	0.231293	-4.40121	1.08e-05	0.000347662
RPPH1	38.3929	-1.01795	0.391363	-2.60105	0.00929398	0.0382761
LOC728989	3.96651	-1.01784	0.319767	-3.18306	0.00145726	0.0104127
CHPT1	758.438	-1.0177	0.259782	-3.91753	8.95e-05	0.00145673
CD48	447.006	-1.01769	0.318968	-3.19058	0.00141985	0.0102195
FAM166B	6.39951	-1.01738	0.338231	-3.00794	0.00263026	0.0158221
ACBD4	134.226	-1.01698	0.197626	-5.146	2.66e-07	2.67e-05
MYCBPAP	6.34006	-1.01688	0.341891	-2.97429	0.0029367	0.0170232
WIPF3	36.0125	-1.01562	0.314747	-3.22678	0.00125193	0.00939415
HCG27	14.1292	-1.01507	0.295915	-3.43026	0.000602996	0.0056697
C2CD4B	53.2738	-1.01485	0.309578	-3.27817	0.00104482	0.00830531
SRPK3	58.436	-1.01463	0.389251	-2.60663	0.00914386	0.0378534
PLA2G16	147.472	-1.01424	0.266219	-3.80978	0.00013909	0.00200962
C8orf77	5.87471	-1.01381	0.323185	-3.13693	0.00170728	0.0116585
HLA.DRB6	631.786	-1.01155	0.265297	-3.81289	0.000137349	0.00199681
SCML4	52.2409	-1.01152	0.375269	-2.69545	0.00702932	0.0313278
DAND5	3.61016	-1.00984	0.416869	-2.42245	0.0154162	0.0550961
CYP46A1	7.70645	-1.00976	0.457765	-2.20586	0.027394	0.0836418
SIT1	116.801	-1.00972	0.324974	-3.10706	0.00188955	0.0124861
SLC12A3	6.22105	-1.00895	0.418228	-2.41244	0.0158463	0.0560891
BAMBI	195.857	-1.00888	0.348171	-2.89767	0.00375947	0.0201549
CYP2E1	269.126	-1.00888	0.416634	-2.42149	0.015457	0.0551798
MAP4K1	326.678	-1.00874	0.299593	-3.36705	0.000759768	0.00669966
C5orf45	93.4164	-1.00754	0.191452	-5.26266	1.42e-07	1.72e-05
TTYH1	13.5428	-1.00657	0.312237	-3.22372	0.00126538	0.00946194
GGT3P	17.3297	-1.00565	0.34452	-2.91898	0.00351176	0.0192033
HTR2B	19.965	-1.00534	0.415518	-2.41948	0.0155426	0.0553613
RNASE2	15.3725	-1.00439	0.327743	-3.06455	0.00217997	0.0138642
ENOX1	26.5912	-1.00301	0.344925	-2.90791	0.00363853	0.0196676
OTOA	9.90462	-1.00261	0.379804	-2.6398	0.00829558	0.0353874
MYH15	7.84283	-1.00221	0.367723	-2.72545	0.00642141	0.0294878
CD7	470.881	-1.00148	0.300722	-3.33026	0.000867662	0.00734808
PCP2	17.3792	-1.00094	0.360352	-2.77767	0.00547506	0.0263824
RELB	1571.51	-1.00093	0.244923	-4.08672	4.38e-05	0.000887381
LEAP2	6.67363	-1.0008	0.342542	-2.9217	0.00348132	0.0191165
PARVG	291.72	-0.999465	0.257297	-3.88449	0.000102547	0.0016139
PTGES	2328.97	-0.999353	0.318552	-3.13717	0.00170585	0.011653
ZNF90	397.994	-0.998812	0.205497	-4.86048	1.17e-06	7.61e-05
HLA.DQA1	2347.85	-0.998496	0.324227	-3.07962	0.00207265	0.0133528
TMEM59L	5.45921	-0.996924	0.459586	-2.16918	0.0300691	0.0893254
PLCL2	217.266	-0.996846	0.269798	-3.69479	0.000220067	0.00278079
LAG3	346.345	-0.996586	0.326257	-3.0546	0.00225359	0.0141774
SERPINF1	3538.05	-0.995585	0.335979	-2.96324	0.00304423	0.0175136
CHRNA10	13.4816	-0.99518	0.232554	-4.27935	1.87e-05	0.000495202
LRRC16B	50.9069	-0.994778	0.316193	-3.14611	0.00165458	0.0113979
FCGR2B	164.582	-0.994446	0.262029	-3.79517	0.000147543	0.00211344
BGLAP	31.1668	-0.994389	0.184182	-5.39896	6.7e-08	1.02e-05
HLA.DRB1	7390.01	-0.994302	0.282726	-3.51684	0.000436725	0.00451627
CASC1	7.49317	-0.993408	0.400396	-2.48106	0.0130992	0.0488646
CCL17	22.624	-0.993192	0.326442	-3.04248	0.00234639	0.014598
DCLK1	85.3369	-0.991572	0.440557	-2.25072	0.024403	0.0767808
NFIB	1366.07	-0.991548	0.266484	-3.72085	0.000198553	0.00257713
CD69	162.119	-0.991302	0.288275	-3.43873	0.000584444	0.00555798
ZNF540	28.6131	-0.991133	0.24053	-4.12062	3.78e-05	0.000801979
PSTPIP1	171.285	-0.989799	0.253052	-3.91145	9.17e-05	0.00148862
GSTT2	94.8353	-0.989434	0.356924	-2.77212	0.00556933	0.026682
PLXNA4	37.7374	-0.989208	0.419669	-2.35711	0.0184176	0.0624652
RGL4	23.6638	-0.989085	0.318979	-3.10078	0.00193009	0.0126703
C15orf21	70.5649	-0.98886	0.210733	-4.69247	2.7e-06	0.000132425
C15orf52	250.354	-0.988202	0.326275	-3.02874	0.00245578	0.0150255
FCRL3	60.3964	-0.987655	0.435858	-2.266	0.0234514	0.0746367
LAT	273.573	-0.987261	0.253826	-3.88952	0.000100442	0.00159585
C19orf18	3.64918	-0.986784	0.42518	-2.32086	0.0202942	0.0670802
LY6G5C	20.3591	-0.984751	0.175192	-5.62097	1.9e-08	4.46e-06
MYEF2	61.8461	-0.983988	0.412579	-2.38497	0.0170806	0.0593886
KIAA1211	89.903	-0.983091	0.359503	-2.73459	0.00624585	0.028904
KIF19	14.5015	-0.982108	0.353821	-2.77572	0.00550791	0.0264851
ROMO1	1151.24	-0.981513	0.221882	-4.42358	9.71e-06	0.000321287
ARL3	648.549	-0.980642	0.194424	-5.04383	4.56e-07	4e-05
CHST6	169.206	-0.980506	0.395256	-2.48068	0.013113	0.0488942
FBXO15	11.2395	-0.980064	0.37949	-2.58258	0.00980652	0.0397612
NEK10	5.84862	-0.978329	0.44704	-2.18846	0.0286359	0.0863883
FBXO44	364.451	-0.973829	0.187474	-5.19447	2.05e-07	2.23e-05
PKN1	1456.9	-0.972437	0.223381	-4.35328	1.34e-05	0.000394078
LOC728743	143.878	-0.971687	0.193249	-5.02816	4.95e-07	4.2e-05
C14orf72	6.89318	-0.97107	0.292279	-3.3224	0.000892459	0.00745817
LARP6	293.613	-0.970802	0.277255	-3.50147	0.000462692	0.00470519
TMC8	955.196	-0.970621	0.271094	-3.58038	0.000343097	0.00386643
AMY2B	116.301	-0.970477	0.316349	-3.06774	0.00215686	0.0137551
FAM24B	44.0281	-0.969907	0.240449	-4.03374	5.49e-05	0.00103174
C5orf39	97.0703	-0.969894	0.269198	-3.6029	0.000314691	0.00363799
SNHG8	511.936	-0.969432	0.201818	-4.80348	1.56e-06	9.03e-05
NEURL	262.331	-0.969309	0.393142	-2.46555	0.0136805	0.0505098
C6orf52	10.4639	-0.968314	0.310394	-3.11963	0.00181079	0.012157
DMPK	988.53	-0.968031	0.239229	-4.04646	5.2e-05	0.000990027
FCN1	48.1715	-0.967661	0.396112	-2.4429	0.0145698	0.0528461
KBTBD11	69.1926	-0.967081	0.329894	-2.93149	0.00337341	0.0187169
CLEC1A	109.984	-0.966286	0.402071	-2.40327	0.0162493	0.0572502
CUZD1	22.2192	-0.966285	0.221854	-4.3555	1.33e-05	0.00039149
ARHGAP9	357.938	-0.965446	0.261752	-3.6884	0.000225667	0.00283204
DNLZ	191.521	-0.965289	0.204009	-4.73161	2.23e-06	0.000115973
TNFAIP8L2	112.618	-0.964997	0.259074	-3.7248	0.000195472	0.00254905
CCL4L2	128.059	-0.964865	0.30128	-3.20255	0.00136215	0.00992253
LRRC24	28.358	-0.964537	0.392283	-2.45878	0.0139411	0.0512244
SOCS1	469.664	-0.964477	0.290857	-3.31598	0.000913215	0.00757638
CD27	484.383	-0.964101	0.340632	-2.83033	0.00465005	0.0234808
ARHGAP15	92.6765	-0.963356	0.281844	-3.41805	0.000630722	0.00584646
RDH16	157.577	-0.962275	0.411907	-2.33615	0.0194837	0.0651551
CXCL1	1518.27	-0.962202	0.42028	-2.28943	0.0220545	0.0712795
LOC441204	6.2211	-0.961431	0.357934	-2.68606	0.00723005	0.0320123
DFNB59	15.2374	-0.961123	0.253333	-3.79392	0.000148289	0.00211421
C6orf26	32.2406	-0.960437	0.256206	-3.7487	0.000177756	0.00238941
PRSS36	114.103	-0.96025	0.239518	-4.00909	6.1e-05	0.00111534
C1orf54	98.3078	-0.960012	0.192586	-4.98484	6.2e-07	4.92e-05
NCRNA00152	190.634	-0.959476	0.206062	-4.65625	3.22e-06	0.000149853
ADORA1	45.4741	-0.959446	0.293762	-3.26607	0.00109052	0.00855568
TMEM205	1356.64	-0.959189	0.194695	-4.92664	8.37e-07	5.79e-05
SYTL3	279.266	-0.959041	0.26095	-3.67519	0.000237673	0.0029564
IFNG	31.0375	-0.958512	0.426827	-2.24567	0.0247252	0.0774934
KCNIP2	18.9879	-0.95796	0.277715	-3.44944	0.000561758	0.00538976
NFKBIE	647.856	-0.956191	0.173766	-5.50276	3.74e-08	6.92e-06
PLD4	91.8426	-0.955754	0.352951	-2.70789	0.0067712	0.0305412
FAM183A	13.8101	-0.955655	0.326104	-2.93052	0.00338392	0.0187445
PIF1	206.79	-0.9553	0.218011	-4.38189	1.18e-05	0.00037065
FXYD6	748.822	-0.955021	0.406723	-2.34808	0.0188702	0.0636354
RLTPR	129.715	-0.954266	0.300515	-3.17543	0.00149615	0.010612
SLC25A29	714.781	-0.953583	0.198637	-4.80063	1.58e-06	9.12e-05
GPR35	42.7519	-0.953133	0.208651	-4.56807	4.92e-06	0.000198356
SPRN	121.172	-0.952727	0.197518	-4.82349	1.41e-06	8.48e-05
LTA	42.2364	-0.951727	0.33657	-2.82772	0.00468807	0.0236103
C20orf107	1.66135	-0.95123	0.401933	-2.36664	0.0179503	0.0614027
NOXO1	110.838	-0.951145	0.443715	-2.1436	0.0320652	0.093513
LOC151174	6.162	-0.950468	0.375237	-2.53298	0.0113097	0.0439914
NSUN5P1	130.465	-0.95004	0.242426	-3.91889	8.9e-05	0.0014529
ATP5I	1747.15	-0.949951	0.201164	-4.72228	2.33e-06	0.000120115
CTXN1	135.804	-0.9499	0.364233	-2.60795	0.00910871	0.0377827
MTMR9L	56.2954	-0.948807	0.227006	-4.17965	2.92e-05	0.000669067
GABRD	21.2103	-0.948012	0.304566	-3.11267	0.00185404	0.0123655
L3MBTL4	157.495	-0.947784	0.307724	-3.07998	0.00207011	0.0133411
SCUBE2	137.787	-0.947716	0.406608	-2.33078	0.0197648	0.0658528
RASAL3	351.757	-0.947524	0.276998	-3.42069	0.000624628	0.00581939
ANKRD43	43.0658	-0.94698	0.405615	-2.33468	0.0195604	0.065357
CLEC10A	120.79	-0.946033	0.365423	-2.58887	0.00962917	0.039236
PAQR6	42.2043	-0.945336	0.271436	-3.48272	0.000496343	0.00495398
TMEM160	138.498	-0.945145	0.224527	-4.20949	2.56e-05	0.000609233
C9orf46	479.833	-0.944896	0.18161	-5.20289	1.96e-07	2.15e-05
UNC5A	12.8369	-0.944664	0.438875	-2.15247	0.0313607	0.0920291
CYB5A	756.309	-0.94431	0.316687	-2.98184	0.0028652	0.0167785
C16orf93	62.3849	-0.943958	0.191695	-4.92428	8.47e-07	5.84e-05
ATP8B4	59.1975	-0.943341	0.262675	-3.59129	0.000329045	0.00374259
TSPAN32	22.9008	-0.942651	0.346977	-2.71676	0.00659253	0.0300234
CCDC36	4.9037	-0.940993	0.424227	-2.21814	0.0265455	0.0818141
AMT	76.7061	-0.940899	0.272542	-3.4523	0.000555823	0.00535805
LOC728758	92.1535	-0.938613	0.203574	-4.61067	4.01e-06	0.000173155
GNB3	14.094	-0.938343	0.278268	-3.37208	0.000746019	0.00661311
CORO1A	2414.77	-0.938095	0.279425	-3.35724	0.000787258	0.00687351
CLDN5	216.221	-0.937956	0.263722	-3.55661	0.000375677	0.004114
ADAM11	12.883	-0.93777	0.299969	-3.12623	0.00177066	0.0119797
DIRAS3	37.6698	-0.937447	0.435005	-2.15502	0.0311599	0.0916127
PRR5L	399.965	-0.936274	0.266042	-3.51927	0.000432728	0.00448613
GNRH1	33.4064	-0.935803	0.262219	-3.56878	0.000358644	0.00398529
RHBDL1	67.8543	-0.934733	0.30448	-3.06993	0.0021411	0.0136975
DNALI1	37.587	-0.93451	0.39192	-2.38444	0.0171052	0.0594208
MAP1LC3A	401.059	-0.934437	0.285858	-3.26888	0.00107974	0.00849656
IQCD	32.193	-0.933832	0.213456	-4.37482	1.22e-05	0.000375136
PLEKHO1	961.612	-0.933729	0.201429	-4.63553	3.56e-06	0.000161887
CAPS	222.559	-0.93308	0.301313	-3.09671	0.0019568	0.0128005
RPS29	5807.74	-0.932802	0.212289	-4.39402	1.11e-05	0.000356675
SCG2	32.0334	-0.932611	0.426637	-2.18596	0.0288185	0.0867774
NLRP9	2.35573	-0.932465	0.389484	-2.39411	0.0166609	0.0583083
CCDC107	319.927	-0.93197	0.164013	-5.68229	1.33e-08	3.29e-06
HEXDC	385.248	-0.931925	0.218653	-4.26212	2.03e-05	0.000519567
CFP	74.482	-0.931021	0.295803	-3.14744	0.00164708	0.0113659
ATP2A1	42.4127	-0.930482	0.309914	-3.00239	0.00267873	0.0160223
CLEC9A	10.8779	-0.928703	0.401842	-2.31111	0.0208266	0.0684085
NCRNA00107	9.31911	-0.928652	0.321114	-2.89197	0.00382831	0.0204284
GDPD5	152.89	-0.927872	0.26612	-3.48667	0.000489082	0.00489543
VGF	8.73586	-0.927663	0.417066	-2.22426	0.0261312	0.0808634
PLA2G4C	233.698	-0.92638	0.315204	-2.93899	0.00329288	0.018469
C12orf70	15.6574	-0.926274	0.307065	-3.01654	0.00255681	0.0154921
POU5F1	27.7277	-0.925997	0.315975	-2.93061	0.00338302	0.0187445
PSCA	416.22	-0.925484	0.428209	-2.16129	0.030673	0.0906348
ACCS	139.311	-0.924961	0.254288	-3.63746	0.000275344	0.00329317
FUT7	67.725	-0.923848	0.333812	-2.76757	0.00564767	0.0269661
APOC2	113.956	-0.923543	0.372509	-2.47925	0.0131659	0.0490246
SLAIN1	60.7368	-0.921851	0.353506	-2.60774	0.00911434	0.0377909
ZNF853	106.65	-0.921845	0.300312	-3.06962	0.00214329	0.0137068
MORN4	64.1075	-0.921484	0.253828	-3.63035	0.000283042	0.00336767
IL21R	331.155	-0.921429	0.350288	-2.63048	0.00852632	0.036033
EBF4	389.715	-0.92082	0.274264	-3.35742	0.000786723	0.00687211
ASMTL	758.353	-0.920046	0.191252	-4.81065	1.5e-06	8.89e-05
TJP3	541.518	-0.919193	0.390574	-2.35344	0.0186004	0.0629106
MGMT	498.516	-0.919101	0.214485	-4.28515	1.83e-05	0.000489509
GPA33	10.4441	-0.917753	0.366668	-2.50296	0.0123161	0.0468628
RNASE6	223.813	-0.917531	0.259423	-3.53682	0.000404973	0.00430717
HLA.F	3291.77	-0.916855	0.258919	-3.54109	0.000398472	0.00426209
GPR44	3.13797	-0.914881	0.336188	-2.72133	0.00650189	0.0297388
ANKRD10	1173.79	-0.914499	0.1574	-5.81003	6.25e-09	1.97e-06
CD1D	29.5825	-0.914365	0.258848	-3.53243	0.000411754	0.00435264
NFKB2	2519.8	-0.914159	0.202115	-4.52296	6.1e-06	0.000231007
PGM5	58.3302	-0.914097	0.3861	-2.36751	0.0179081	0.0613358
STX1B	29.9691	-0.913411	0.256234	-3.56475	0.0003642	0.00402994
MDP1	183.818	-0.913359	0.177049	-5.1588	2.49e-07	2.55e-05
C1orf190	37.9578	-0.912617	0.282885	-3.2261	0.00125488	0.00940588
GIMAP1	126.323	-0.912304	0.272504	-3.34786	0.000814381	0.00702998
PLEKHA6	257.531	-0.912008	0.347879	-2.62162	0.00875121	0.0367339
MUC1	2093.96	-0.911794	0.319318	-2.85544	0.00429772	0.0222631
NRXN2	52.427	-0.910806	0.381119	-2.38982	0.0168564	0.058809
SNHG3	88.4799	-0.910281	0.268693	-3.38781	0.000704523	0.00634139
S100A4	1467.97	-0.909753	0.222467	-4.08939	4.33e-05	0.000883079
HLA.DRA	18111.7	-0.908549	0.25088	-3.62145	0.000292953	0.00345199
MARCO	135.751	-0.908384	0.426888	-2.12792	0.0333437	0.0961858
CYTH4	414.385	-0.908098	0.247002	-3.67647	0.00023648	0.00294556
HPCA	12.4109	-0.907376	0.371202	-2.44443	0.0145082	0.0526959
IFI27L1	170.057	-0.907271	0.237775	-3.81568	0.00013581	0.0019873
C20orf132	26.7992	-0.906025	0.269485	-3.36206	0.000773624	0.00678679
GGT1	294.251	-0.904945	0.317112	-2.85371	0.00432122	0.0223308
EFHD1	98.7078	-0.904933	0.290665	-3.11332	0.00184993	0.012343
FAM184A	64.9909	-0.9048	0.354604	-2.55158	0.0107235	0.042374
VAMP5	469.028	-0.904233	0.218003	-4.14781	3.36e-05	0.000738145
LPL	178.857	-0.903955	0.399567	-2.26234	0.0236766	0.0751576
APOBEC3G	754.489	-0.903844	0.250903	-3.60237	0.00031533	0.00364029
ANXA6	1982.8	-0.903733	0.233875	-3.86418	0.000111464	0.00172318
FBXO43	47.9258	-0.90364	0.294461	-3.06879	0.00214926	0.0137298
CCL4	269.798	-0.903503	0.290431	-3.1109	0.00186515	0.0123859
FCHO1	194.656	-0.903265	0.277345	-3.25683	0.00112664	0.00872978
PRR22	46.2736	-0.903165	0.288383	-3.13183	0.0017372	0.0118232
CGNL1	310.976	-0.90223	0.369123	-2.44426	0.0145151	0.0526999
TMEM71	94.3671	-0.901442	0.320457	-2.81299	0.00490839	0.0243296
PRRT2	28.1769	-0.901141	0.306066	-2.94427	0.00323718	0.0182683
ETV1	229.564	-0.90103	0.33008	-2.72973	0.00633865	0.0292008
CERKL	53.5247	-0.900976	0.250984	-3.58977	0.000330966	0.00375744
CCL3	163.484	-0.900529	0.274484	-3.2808	0.00103512	0.00825889
UBASH3A	82.8393	-0.900469	0.323985	-2.77936	0.00544669	0.0262941
MCOLN2	79.1687	-0.900366	0.257021	-3.50309	0.000459895	0.00468714
VMO1	53.5666	-0.898386	0.252497	-3.558	0.000373685	0.0040978
KLHDC9	32.4078	-0.898039	0.294892	-3.04532	0.00232432	0.0145003
FAHD2B	139.166	-0.897602	0.29282	-3.06537	0.00217399	0.0138403
S100A13	1163.81	-0.896367	0.162063	-5.53096	3.18e-08	6.02e-06
CTSH	2360.08	-0.894992	0.196568	-4.55309	5.29e-06	0.000208888
PHPT1	1767.01	-0.894859	0.195741	-4.57166	4.84e-06	0.000195848
CD8A	603.387	-0.894822	0.335377	-2.66811	0.00762801	0.0332603
CHKA	322.114	-0.894814	0.202014	-4.42947	9.45e-06	0.000315926
RPS19BP1	1347.82	-0.893806	0.152042	-5.8787	4.14e-09	1.43e-06
TARP	19.4878	-0.893429	0.347985	-2.56744	0.0102454	0.0409881
ACY3	35.5289	-0.893283	0.284277	-3.1423	0.00167628	0.0114982
VWA3B	4.4191	-0.89324	0.413993	-2.15762	0.0309574	0.0911668
DERL3	993.812	-0.89307	0.280455	-3.18436	0.00145075	0.0103742
MSRA	174.695	-0.891404	0.183684	-4.85292	1.22e-06	7.73e-05
SSR4	3403.09	-0.890744	0.180431	-4.93676	7.94e-07	5.67e-05
C12orf57	1530.4	-0.889264	0.175172	-5.07651	3.84e-07	3.54e-05
C1orf162	152.971	-0.889201	0.237398	-3.74562	0.000179952	0.00240981
FAAH2	230.195	-0.889184	0.236666	-3.75712	0.000171881	0.00234927
GPR84	40.3231	-0.888742	0.262511	-3.38554	0.000710385	0.00637539
DOK1	211.018	-0.888247	0.187424	-4.73924	2.15e-06	0.00011335
FBXW10	5.93878	-0.888206	0.353991	-2.50912	0.0121033	0.0462942
GDPD3	135.383	-0.887807	0.304071	-2.91974	0.00350326	0.0191852
HESX1	9.2606	-0.887546	0.253298	-3.50397	0.000458384	0.00467434
NSUN5P2	329.825	-0.887103	0.22642	-3.91795	8.93e-05	0.0014555
HMHA1	1243.15	-0.887039	0.203663	-4.35542	1.33e-05	0.00039149
CDKN2BAS	58.035	-0.885584	0.210954	-4.19799	2.69e-05	0.000633824
YPEL1	226.628	-0.885472	0.258419	-3.4265	0.000611407	0.00572406
RASL10A	5.69291	-0.885133	0.33523	-2.64038	0.00828141	0.0353464
RHOBTB2	562.968	-0.885105	0.23167	-3.82054	0.000133161	0.00196241
JAKMIP1	49.2203	-0.884688	0.343428	-2.57605	0.00999357	0.0403062
S100B	209.296	-0.884583	0.292142	-3.02792	0.00246243	0.0150596
SNHG6	1280.67	-0.883777	0.209499	-4.21852	2.46e-05	0.000594037
ANO9	493.195	-0.883089	0.228194	-3.86991	0.000108876	0.00169173
C19orf76	33.9471	-0.883	0.243294	-3.62936	0.000284128	0.0033784
ISLR2	40.9752	-0.88255	0.386345	-2.28435	0.0223507	0.0719831
RBP7	171.727	-0.882488	0.340178	-2.5942	0.0094812	0.0387899
WAS	320.463	-0.882069	0.26413	-3.33952	0.000839227	0.00717019
MMP28	1377.29	-0.880373	0.398972	-2.2066	0.0273419	0.0835519
NCR3	22.9151	-0.880159	0.393679	-2.23573	0.0253696	0.0789998
CHI3L2	216.029	-0.880147	0.380359	-2.31399	0.0206683	0.0680224
ATAD3C	48.738	-0.879531	0.292613	-3.00578	0.00264897	0.0158892
CLEC4A	59.5882	-0.878575	0.232936	-3.77175	0.000162109	0.00225342
LOC150381	79.8704	-0.875112	0.222426	-3.9344	8.34e-05	0.00140795
GMPR	153.494	-0.875099	0.339529	-2.5774	0.00995481	0.0402118
HLA.DQB2	565.398	-0.874909	0.357348	-2.44834	0.0143517	0.0523035
TTLL3	292.398	-0.874267	0.217472	-4.02014	5.82e-05	0.00107288
FAM198A	25.2096	-0.874009	0.407128	-2.14677	0.031812	0.0929814
RASGRF1	19.7292	-0.873943	0.327436	-2.66905	0.00760655	0.03323
SLC22A4	49.1923	-0.873869	0.272789	-3.20346	0.00135788	0.00990325
BATF3	52.033	-0.873797	0.217002	-4.02668	5.66e-05	0.0010508
NFE2L3	1483.93	-0.872363	0.295339	-2.95377	0.0031392	0.0178749
CPT1C	119.031	-0.872182	0.302722	-2.88114	0.00396243	0.0209896
CD200	373.099	-0.872182	0.357736	-2.43806	0.0147663	0.053306
LY96	85.6333	-0.870293	0.24182	-3.59893	0.000319526	0.00366615
CYFIP2	617.284	-0.869242	0.272191	-3.1935	0.00140559	0.0101398
PTMS	5623.78	-0.867958	0.174924	-4.96191	6.98e-07	5.33e-05
CD3E	731.439	-0.866522	0.298754	-2.90045	0.00372629	0.020018
MMP23B	58.9814	-0.865193	0.311241	-2.77982	0.00543895	0.0262706
MAPK12	226.212	-0.865121	0.268114	-3.22669	0.0012523	0.00939415
REM2	15.0775	-0.864419	0.25539	-3.3847	0.00071255	0.0063792
TFR2	85.2474	-0.864401	0.314643	-2.74724	0.00600988	0.0281794
CPT1B	399.015	-0.863548	0.260003	-3.3213	0.000896007	0.007481
ALDH2	4157.64	-0.862901	0.262137	-3.2918	0.000995491	0.00804067
LOC100128292	13.3332	-0.862662	0.262314	-3.28867	0.00100663	0.00809497
DPEP2	41.9432	-0.862064	0.307273	-2.80553	0.00502335	0.0247651
CD40LG	31.1345	-0.862031	0.39388	-2.18856	0.0286285	0.0863883
IL17RB	194.194	-0.861952	0.310852	-2.77287	0.00555643	0.0266415
IL12B	6.19097	-0.861909	0.363696	-2.36986	0.0177947	0.0610983
SKAP1	190.33	-0.861711	0.300089	-2.87152	0.00408501	0.0214609
ZNF771	66.6616	-0.861647	0.194637	-4.42695	9.56e-06	0.000318607
C6orf201	2.76623	-0.861308	0.31526	-2.73206	0.00629403	0.029061
TUBA8	50.0533	-0.860997	0.215873	-3.98845	6.65e-05	0.00119784
NDUFA3	653.68	-0.85998	0.160143	-5.37007	7.87e-08	1.15e-05
SIRPG	150.457	-0.8587	0.335111	-2.56243	0.0103942	0.0413939
ARL9	19.0593	-0.858309	0.347393	-2.47071	0.0134844	0.0499467
RPS6KL1	66.2205	-0.857611	0.329437	-2.60326	0.00923417	0.0381154
ETV7	433.299	-0.857521	0.226469	-3.78648	0.000152794	0.00215498
NKG7	466.118	-0.85721	0.370572	-2.31321	0.0207113	0.0681152
PYCARD	1139.28	-0.857103	0.216727	-3.95476	7.66e-05	0.0013239
HLA.DQA2	716.216	-0.857009	0.312573	-2.74179	0.00611056	0.0284975
OLFM1	1845.4	-0.856419	0.400734	-2.13713	0.0325875	0.0945443
PPP2R3B	437.654	-0.855854	0.211551	-4.04561	5.22e-05	0.000991572
TLR9	60.0123	-0.855403	0.339336	-2.52082	0.0117083	0.0451464
TRAPPC6A	335.769	-0.853836	0.201376	-4.24002	2.24e-05	0.00055673
C7orf59	1419.17	-0.853633	0.217328	-3.92786	8.57e-05	0.00143115
C1QA	2827.04	-0.853456	0.315829	-2.70227	0.00688674	0.0308649
FAM26F	259.29	-0.853041	0.300057	-2.84293	0.00447007	0.0228425
TMEM56	183.406	-0.852081	0.30484	-2.79518	0.00518712	0.0253751
CLYBL	70.3386	-0.85101	0.184116	-4.62214	3.8e-06	0.000167666
HINT2	454.44	-0.850746	0.201144	-4.22953	2.34e-05	0.000572487
C11orf93	82.3198	-0.850209	0.305014	-2.78744	0.00531257	0.0258234
GGT7	502.387	-0.850094	0.250769	-3.38995	0.000699053	0.00630454
DENND3	595.887	-0.849961	0.211348	-4.02163	5.78e-05	0.00106718
GPSM3	537.585	-0.849864	0.243087	-3.49614	0.000472049	0.00477386
KCNN3	74.0693	-0.849571	0.32506	-2.61358	0.00895994	0.0373195
POU5F1B	13.4908	-0.849378	0.278746	-3.04714	0.00231031	0.0144424
RPS26	706.774	-0.849247	0.164784	-5.15371	2.55e-07	2.59e-05
C17orf108	107.343	-0.848907	0.185783	-4.56933	4.89e-06	0.000197596
TSTD1	622.373	-0.84877	0.181538	-4.67543	2.93e-06	0.000141244
FLJ43663	43.2161	-0.848766	0.238826	-3.55391	0.000379546	0.00413486
RPS19	21997.7	-0.848579	0.190111	-4.46359	8.06e-06	0.000280978
RBPMS2	30.0959	-0.848459	0.327794	-2.58839	0.00964254	0.0392552
CITED1	2.88363	-0.847938	0.383877	-2.20888	0.0271829	0.0831643
CLIC2	379.561	-0.84775	0.250686	-3.38171	0.000720354	0.0064365
RBM11	24.7028	-0.847041	0.397964	-2.12843	0.0333011	0.0961136
CMTM2	3.45239	-0.845869	0.3567	-2.37137	0.0177223	0.0608954
ASTN2	353.027	-0.845416	0.287252	-2.94312	0.00324926	0.0183073
RGS1	1423.92	-0.845397	0.309339	-2.73291	0.00627771	0.0290222
CDRT4	327.464	-0.845045	0.198115	-4.26542	2e-05	0.000513813
LRRC46	26.6364	-0.844411	0.280947	-3.00559	0.00265066	0.0158927
ATP2A3	1197.68	-0.843717	0.254172	-3.31947	0.000901892	0.00752329
ZNF781	4.83642	-0.843676	0.278084	-3.03389	0.00241422	0.0148639
LOC92973	9.72438	-0.843604	0.37491	-2.25015	0.0244392	0.0768334
MNS1	152.214	-0.843261	0.243602	-3.46163	0.000536905	0.00524742
SARDH	53.7996	-0.843033	0.261539	-3.22336	0.00126697	0.00946614
HLA.H	3833.72	-0.8424	0.263789	-3.19346	0.00140581	0.0101398
DDO	19.476	-0.84231	0.386049	-2.18187	0.0291189	0.0873281
RPL34	6729.33	-0.842287	0.160808	-5.23783	1.62e-07	1.89e-05
TMEM231	105.312	-0.841664	0.270734	-3.10883	0.00187832	0.0124477
VAMP1	192.283	-0.84165	0.215382	-3.9077	9.32e-05	0.0015092
C6orf97	28.0339	-0.840999	0.305563	-2.75229	0.00591802	0.0279153
ST3GAL4	361.281	-0.839885	0.222216	-3.77958	0.000157093	0.00220543
HLA.J	12.1117	-0.839397	0.319106	-2.63047	0.00852676	0.036033
NBEA	66.8454	-0.838554	0.384481	-2.18101	0.029183	0.0874584
MXD3	489.915	-0.838398	0.192876	-4.34682	1.38e-05	0.000404562
ZNF389	8.36968	-0.838357	0.292003	-2.87106	0.00409102	0.0214802
LRRC49	90.7233	-0.838195	0.200411	-4.18237	2.88e-05	0.000668131
IFFO1	160.73	-0.838145	0.215584	-3.88779	0.000101161	0.00160171
RAB39B	27.9579	-0.837692	0.315039	-2.65901	0.00783708	0.0339539
CLEC4E	39.6546	-0.837579	0.345678	-2.423	0.0153928	0.0550686
NHLRC4	10.4115	-0.837444	0.281497	-2.97497	0.00293018	0.0170156
LOC221442	28.3963	-0.836571	0.27994	-2.98839	0.00280448	0.0165498
SYCE2	88.6671	-0.835637	0.303546	-2.75291	0.00590676	0.0278837
LRRC66	3.37407	-0.835547	0.390964	-2.13715	0.0325861	0.0945443
EBI3	60.1113	-0.835444	0.277183	-3.01406	0.0025778	0.0155747
LOC440957	117.052	-0.834986	0.219	-3.81273	0.000137441	0.00199681
POM121L9P	5.70572	-0.834694	0.367083	-2.27385	0.0229747	0.0734942
MIR17HG	35.9517	-0.834254	0.291518	-2.86175	0.00421302	0.0219573
ADORA2A	176.753	-0.833351	0.246197	-3.3849	0.000712039	0.0063792
RPL13AP3	25.4172	-0.833074	0.231396	-3.6002	0.000317972	0.00365747
SCARNA9	2.97087	-0.832873	0.322591	-2.58182	0.00982806	0.0398226
PTP4A3	745.794	-0.832771	0.253729	-3.28213	0.00103026	0.00822511
GYPE	4.16014	-0.83246	0.352446	-2.36195	0.0181789	0.0619563
C9orf142	612.982	-0.832261	0.176281	-4.72122	2.34e-06	0.0001204
FAM27C	19.6367	-0.831551	0.298226	-2.78832	0.00529819	0.0257809
C19orf38	45.1004	-0.830331	0.218745	-3.79588	0.000147121	0.00211068
FBXL15	237.739	-0.829969	0.168391	-4.92882	8.27e-07	5.75e-05
RPL36	9134.41	-0.82975	0.198546	-4.17914	2.93e-05	0.000669067
C2orf54	871.435	-0.828918	0.366543	-2.26144	0.0237317	0.0752545
C8orf31	4.51927	-0.828516	0.373614	-2.21757	0.0265839	0.081868
ATP5E	3889.49	-0.828457	0.177783	-4.65992	3.16e-06	0.000148334
JAZF1	292.722	-0.827427	0.221719	-3.73186	0.000190068	0.00250411
ZNF428	588.184	-0.826813	0.178232	-4.63898	3.5e-06	0.000160419
SIGIRR	659.738	-0.826451	0.181993	-4.54111	5.6e-06	0.000215996
FKBP11	627.674	-0.826333	0.199328	-4.14558	3.39e-05	0.000743377
CXCL2	122.656	-0.826031	0.38015	-2.17291	0.0297871	0.0887609
FLT3	28.6324	-0.825951	0.347095	-2.37961	0.0173309	0.0599551
HSD17B14	69.9723	-0.825159	0.263604	-3.1303	0.00174631	0.0118587
LIMD2	926.462	-0.823349	0.222493	-3.70056	0.000215122	0.0027296
TYROBP	794.52	-0.822186	0.265097	-3.10146	0.00192571	0.012658
TIMP1	3188.2	-0.822073	0.243188	-3.38041	0.000723784	0.0064577
RASSF2	678.56	-0.822019	0.289707	-2.83742	0.00454801	0.0231055
LY9	105.604	-0.821916	0.376147	-2.18509	0.0288821	0.086926
NTNG2	20.6156	-0.821229	0.258359	-3.17863	0.0014797	0.0105361
TRPM2	232.047	-0.821023	0.250108	-3.28268	0.00102826	0.00821486
ACOXL	6.08473	-0.820968	0.353471	-2.32259	0.0202011	0.0668447
PLAC4	8.19205	-0.820954	0.370487	-2.21588	0.0267	0.0820856
HIST2H2AC	13.2638	-0.820778	0.257961	-3.1818	0.00146365	0.0104339
ANGPTL6	11.4942	-0.820644	0.28279	-2.90195	0.00370844	0.0199338
FAIM3	332.743	-0.820348	0.311962	-2.62965	0.0085474	0.0360932
DAPK2	230.745	-0.819832	0.216067	-3.79434	0.000148034	0.00211387
CD300A	211.793	-0.818672	0.22532	-3.63338	0.000279732	0.00333477
RPS24	15660.1	-0.817555	0.179584	-4.55249	5.3e-06	0.00020904
HLA.DPA1	6393.97	-0.817265	0.252597	-3.23546	0.00121449	0.00919772
LOC338799	193.793	-0.817042	0.263803	-3.09716	0.00195382	0.0127983
SERPINF2	215.051	-0.816623	0.283338	-2.88216	0.00394963	0.0209417
FPR1	126.178	-0.816528	0.284499	-2.87005	0.00410404	0.0215301
TOMM7	1424.53	-0.816169	0.168658	-4.8392	1.3e-06	8.05e-05
ALOX5AP	393.448	-0.815617	0.229051	-3.56085	0.000369656	0.00406983
ANKRD58	22.0155	-0.815506	0.298587	-2.73122	0.00631001	0.029098
PARVB	337.849	-0.815484	0.228911	-3.56245	0.000367405	0.00405074
CEACAM21	26.8142	-0.814999	0.276212	-2.95063	0.0031713	0.0180018
TLE2	404.139	-0.814814	0.344646	-2.3642	0.0180689	0.0616702
ANG	96.6317	-0.814467	0.212082	-3.84034	0.000122864	0.00185255
NME3	452.326	-0.814237	0.192791	-4.22342	2.41e-05	0.000585403
GRAMD1A	966.556	-0.813967	0.215756	-3.77263	0.000161533	0.00225053
SAMD11	25.2059	-0.813833	0.381754	-2.13182	0.0330214	0.0954662
MYL6B	852.81	-0.813473	0.151401	-5.37299	7.74e-08	1.15e-05
RPS21	8139.06	-0.813111	0.211248	-3.84908	0.000118564	0.00180405
ZNF671	47.3732	-0.813079	0.244788	-3.32157	0.000895135	0.00747713
RPL31	10539.3	-0.812748	0.166206	-4.89001	1.01e-06	6.75e-05
CD180	123.828	-0.812747	0.330254	-2.46098	0.0138559	0.0510546
MICALL2	902.718	-0.812504	0.188915	-4.30089	1.7e-05	0.000468314
TSNAXIP1	12.4145	-0.812141	0.282768	-2.87211	0.0040774	0.0214456
CYorf15A	180.579	-0.811118	0.36808	-2.20364	0.0275494	0.0840042
PTH1R	10.2512	-0.810793	0.381212	-2.12688	0.03343	0.0963287
BTLA	37.5772	-0.810207	0.362141	-2.23727	0.0252685	0.0787654
GNG7	85.3238	-0.810111	0.307981	-2.6304	0.00852852	0.036033
TMEM191A	37.3845	-0.809868	0.232243	-3.48716	0.000488177	0.00489111
PLEKHB1	83.7399	-0.809153	0.327383	-2.47158	0.0134518	0.0498499
C20orf46	28.6104	-0.807559	0.27655	-2.92011	0.00349904	0.0191736
FAM176B	160.063	-0.807367	0.19161	-4.21359	2.51e-05	0.000603429
AURKC	13.635	-0.807193	0.249417	-3.23632	0.00121081	0.00917743
GPD1	15.9671	-0.807056	0.338665	-2.38305	0.01717	0.0595557
HOXA10	182.446	-0.806868	0.313692	-2.57217	0.0101064	0.0406184
CCDC136	26.1623	-0.805711	0.323948	-2.48716	0.0128766	0.0483654
NR2F2	622.975	-0.80569	0.247371	-3.25702	0.0011259	0.00872868
C6orf174	27.5901	-0.805636	0.321359	-2.50696	0.0121773	0.0464898
KCTD17	206.075	-0.805142	0.211785	-3.80169	0.000143714	0.00206829
KHK	282.469	-0.804892	0.228493	-3.5226	0.000427331	0.00445684
G0S2	131.856	-0.8043	0.279864	-2.87389	0.00405446	0.0213371
LAGE3	707.495	-0.804199	0.215748	-3.72749	0.000193395	0.00253823
ACRC	15.304	-0.803664	0.232396	-3.45816	0.00054387	0.00528513
HAPLN3	973.32	-0.803631	0.187904	-4.27681	1.9e-05	0.000498734
MAP6	14.3481	-0.803479	0.336778	-2.38578	0.0170428	0.0593279
VAV1	276.141	-0.800924	0.268817	-2.97944	0.00288776	0.0168621
APBB1IP	276.383	-0.800458	0.265984	-3.00942	0.00261751	0.0157609
CTLA4	145.483	-0.800061	0.274612	-2.91342	0.00357497	0.0194386
LOC678655	207.235	-0.799014	0.196484	-4.06655	4.77e-05	0.000939167
GAS5	1449.95	-0.798798	0.209848	-3.80655	0.000140916	0.00203281
C2orf89	64.9705	-0.798692	0.377608	-2.11514	0.0344184	0.0982656
OAZ3	15.8278	-0.798499	0.189964	-4.20341	2.63e-05	0.000621212
KIAA0495	350.929	-0.797946	0.204996	-3.8925	9.92e-05	0.00158051
PRICKLE4	65.275	-0.79728	0.252652	-3.15564	0.00160144	0.0111263
C20orf199	1556.8	-0.797126	0.224796	-3.546	0.00039112	0.00420598
CD2	634.895	-0.796538	0.304595	-2.61507	0.00892084	0.0371989
SEC11C	852.016	-0.796514	0.156681	-5.08365	3.7e-07	3.46e-05
TMEM149	307.117	-0.796346	0.21237	-3.74981	0.000176967	0.00238665
FAM116B	132.349	-0.796337	0.163765	-4.86268	1.16e-06	7.56e-05
QDPR	607.078	-0.795251	0.223119	-3.56425	0.000364898	0.00403389
RHEBL1	88.4253	-0.794559	0.213546	-3.72078	0.000198608	0.00257713
TBXAS1	178.168	-0.794145	0.243533	-3.26093	0.00111049	0.0086531
GMDS	399.33	-0.793848	0.150535	-5.27352	1.34e-07	1.65e-05
RP9P	151.391	-0.792114	0.149121	-5.31191	1.08e-07	1.42e-05
COL11A2	24.5762	-0.791841	0.342214	-2.31388	0.0206743	0.0680302
FBXL16	251.699	-0.791329	0.289231	-2.73598	0.00621954	0.0288113
KLHL31	20.3792	-0.791187	0.340824	-2.32139	0.0202656	0.0670099
LOC100270710	266.056	-0.79076	0.2336	-3.3851	0.000711518	0.0063792
ZNF580	311.243	-0.790334	0.158847	-4.97545	6.51e-07	5.04e-05
HAUS7	486.855	-0.790331	0.208488	-3.79077	0.00015018	0.00212793
PDE6G	16.3265	-0.788688	0.331618	-2.37831	0.0173924	0.0601003
SNHG5	1526.63	-0.788318	0.223318	-3.53002	0.000415523	0.00438103
IFI30	4926.78	-0.788289	0.216042	-3.64877	0.000263499	0.00320374
GAB3	95.1908	-0.788212	0.238546	-3.30424	0.000952346	0.00782315
UBXN11	577.767	-0.788139	0.179078	-4.4011	1.08e-05	0.000347662
RPL37A	13273.5	-0.787919	0.184594	-4.26839	1.97e-05	0.000509133
ARL6IP4	2864.91	-0.786907	0.151078	-5.20862	1.9e-07	2.1e-05
PLAC9	29.0171	-0.78685	0.318243	-2.47248	0.0134179	0.0497709
PPIEL	44.0701	-0.786527	0.281355	-2.79549	0.00518205	0.0253571
RPL32	11786.2	-0.786066	0.183737	-4.27822	1.88e-05	0.000496286
FLT3LG	237.694	-0.784938	0.191891	-4.09054	4.3e-05	0.000879677
CCR7	297.938	-0.78454	0.328371	-2.38919	0.0168857	0.0588815
SCAND1	912.548	-0.783972	0.205391	-3.81697	0.000135101	0.00198007
C12orf24	103.421	-0.782989	0.247609	-3.1622	0.00156581	0.0109535
BREA2	4.82496	-0.782731	0.312161	-2.50746	0.0121602	0.0464591
EPHX2	687.078	-0.782595	0.273508	-2.86133	0.0042187	0.0219744
NDUFA1	1674.25	-0.782544	0.190995	-4.0972	4.18e-05	0.000861477
IDUA	168.745	-0.782492	0.226035	-3.46181	0.000536551	0.00524675
MS4A6A	556.322	-0.782137	0.253045	-3.09091	0.00199547	0.012972
C1QTNF1	822.575	-0.781811	0.285876	-2.73479	0.00624194	0.0288932
ECSCR	39.5786	-0.781257	0.213624	-3.65716	0.000255022	0.00312346
SH2B2	65.3	-0.78118	0.234587	-3.33002	0.000868402	0.00734941
KDM5D	667.993	-0.780937	0.370856	-2.10577	0.0352243	0.0999903
SLC25A21	13.011	-0.780613	0.282252	-2.76566	0.00568078	0.0271031
CCDC72	644.309	-0.780565	0.21424	-3.64342	0.000269038	0.00324314
RPS27A	4857.88	-0.780549	0.164186	-4.75405	1.99e-06	0.000108474
MRS2P2	2.59519	-0.780532	0.339328	-2.30023	0.0214352	0.0698692
MPZ	22.4782	-0.779251	0.269651	-2.88985	0.00385428	0.0205073
PDRG1	705.43	-0.779024	0.17984	-4.33177	1.48e-05	0.000423094
CD300LF	75.8454	-0.778692	0.297129	-2.62072	0.00877442	0.0367639
C2CD4D	16.4967	-0.777945	0.26917	-2.89016	0.00385046	0.0204989
CST7	237.801	-0.77667	0.294101	-2.64083	0.0082704	0.0353221
MPP3	81.8831	-0.77661	0.235808	-3.2934	0.000989837	0.00802242
ZNF688	215.417	-0.776291	0.155842	-4.98127	6.32e-07	4.95e-05
MMP19	603.734	-0.776183	0.246526	-3.14849	0.00164118	0.011338
MAMDC4	176.085	-0.775764	0.33076	-2.3454	0.0190068	0.0640253
COMMD7	772.548	-0.775654	0.182344	-4.25379	2.1e-05	0.000533742
NENF	926.913	-0.7751	0.158475	-4.89101	1e-06	6.75e-05
ZFP28	91.2119	-0.775099	0.328865	-2.35689	0.0184287	0.0624913
PSMB9	1978.37	-0.775011	0.265755	-2.91626	0.00354257	0.0193104
PNKD	1072.93	-0.77455	0.178864	-4.33038	1.49e-05	0.000424896
AGAP4	171.519	-0.773803	0.183914	-4.20742	2.58e-05	0.000611876
ARHGAP22	144.602	-0.773702	0.19895	-3.88893	0.000100687	0.00159835
PAPSS2	613.626	-0.773217	0.303894	-2.54436	0.0109478	0.0430283
RAB36	267.073	-0.772573	0.263077	-2.93668	0.00331751	0.0185503
RPL26	7272.79	-0.772392	0.167363	-4.61507	3.93e-06	0.000171655
GIMAP5	398.084	-0.772269	0.272816	-2.83073	0.00464416	0.0234575
MDGA1	281.437	-0.772172	0.31201	-2.47483	0.01333	0.0495552
NT5M	114.196	-0.772163	0.287738	-2.68356	0.0072843	0.0321589
DACT3	40.8757	-0.771985	0.277809	-2.77883	0.00545553	0.0263229
HMSD	62.2554	-0.770907	0.362933	-2.1241	0.0336614	0.0967976
C7orf41	545.496	-0.770869	0.278888	-2.76409	0.00570826	0.0272059
HLA.DQB1	3273.81	-0.770768	0.313677	-2.4572	0.0140023	0.0513962
IL18R1	123.076	-0.770549	0.250482	-3.07627	0.0020961	0.0134494
LAT2	217.081	-0.770516	0.236233	-3.26167	0.00110757	0.00863674
ERMN	13.1117	-0.770472	0.28868	-2.66895	0.00760884	0.033232
CCDC104	489.069	-0.770307	0.163914	-4.69945	2.61e-06	0.000129271
PYROXD2	54.0949	-0.770137	0.303045	-2.54133	0.0110432	0.0432484
PIK3R6	45.7754	-0.76987	0.237882	-3.23635	0.00121068	0.00917743
RPS9	15209	-0.769368	0.161992	-4.74941	2.04e-06	0.000110603
FAM27A	16.25	-0.768649	0.280614	-2.73917	0.00615944	0.028627
PIN4	292.842	-0.768549	0.174972	-4.39241	1.12e-05	0.000358438
FAM158A	236.651	-0.768419	0.192499	-3.9918	6.56e-05	0.00118571
ZNF32	469.562	-0.768015	0.137969	-5.56658	2.6e-08	5.29e-06
CACNB1	163.008	-0.767933	0.273739	-2.80534	0.00502629	0.0247667
TRAF1	752.069	-0.767585	0.309467	-2.48035	0.0131254	0.0489094
GZMA	354.57	-0.767568	0.338579	-2.26703	0.0233885	0.0745787
NAPSA	6.56512	-0.76739	0.286122	-2.68203	0.00731761	0.0322365
SPI1	572.138	-0.767356	0.242906	-3.15907	0.00158274	0.0110424
IL3RA	142.939	-0.767176	0.21961	-3.49336	0.000476986	0.00481317
TCEA2	262.6	-0.767073	0.232947	-3.29291	0.000991571	0.00802269
C3orf42	22.5727	-0.766719	0.213645	-3.58875	0.000332269	0.0037699
ST8SIA1	122.769	-0.766437	0.342459	-2.23804	0.0252183	0.0786355
MIAT	335.364	-0.7663	0.282804	-2.70966	0.00673532	0.0304843
LGALS1	4665.43	-0.766139	0.236466	-3.23995	0.0011955	0.00908587
SLC12A7	2263.49	-0.765586	0.297923	-2.56975	0.0101773	0.0407961
SLC25A6	12475.7	-0.764375	0.182809	-4.18127	2.9e-05	0.000668131
PPIL6	31.9768	-0.763679	0.254295	-3.00312	0.00267224	0.0159938
FAM110B	90.5401	-0.763261	0.339346	-2.24921	0.0244988	0.076955
SULT1A2	9.17785	-0.763204	0.259496	-2.9411	0.00327053	0.0183829
NCRNA00219	271.01	-0.762807	0.185868	-4.10402	4.06e-05	0.000842469
PION	375.231	-0.762649	0.230493	-3.30878	0.000937028	0.00773196
BTK	168.193	-0.762005	0.290861	-2.61982	0.00879757	0.0368189
NINJ1	1835.92	-0.761343	0.234758	-3.24309	0.0011824	0.009018
B4GALT6	150.167	-0.761203	0.283726	-2.68288	0.00729912	0.0322092
PIM2	1145.85	-0.760776	0.257974	-2.94904	0.0031876	0.0180775
C6orf129	312.012	-0.760704	0.174569	-4.35762	1.31e-05	0.000390084
ICAM3	574.258	-0.76069	0.227586	-3.34242	0.000830503	0.00711206
NDUFAF2	156.915	-0.759843	0.192512	-3.94699	7.91e-05	0.00135701
SULT1A3	722.127	-0.759802	0.197842	-3.84045	0.000122809	0.00185255
GBP4	2269.25	-0.75921	0.305597	-2.48435	0.0129787	0.0485594
FCER1G	516.411	-0.758629	0.252544	-3.00395	0.00266498	0.0159629
PLCB2	271.619	-0.758518	0.234746	-3.23122	0.00123261	0.00927748
TSPAN4	505.765	-0.757848	0.201098	-3.76855	0.000164197	0.00227383
C6orf41	15.8304	-0.757804	0.265043	-2.85917	0.00424747	0.0220665
U2AF1L4	165.457	-0.757543	0.165231	-4.58475	4.55e-06	0.000187157
ATP8A1	177.852	-0.756584	0.273801	-2.76326	0.00572264	0.0272531
BVES	160.233	-0.755601	0.343798	-2.19781	0.0279627	0.0849258
CDK3	208.394	-0.755425	0.244074	-3.09507	0.0019677	0.0128345
C11orf75	271.576	-0.754279	0.197596	-3.81728	0.000134932	0.00197918
KLRG1	20.0818	-0.754173	0.289003	-2.60957	0.00906554	0.0376592
RPS10	3131.84	-0.753146	0.191297	-3.93705	8.25e-05	0.00140039
ZNF233	9.34313	-0.752668	0.239482	-3.1429	0.00167283	0.0114892
NMU	585.791	-0.752208	0.341707	-2.20133	0.0277129	0.0843766
AGAP8	29.7079	-0.751621	0.269322	-2.79079	0.0052579	0.0256256
TCF7	495.372	-0.751493	0.229773	-3.27059	0.00107325	0.00847462
C7orf47	256.95	-0.751456	0.183221	-4.10136	4.11e-05	0.000849001
CYGB	326.407	-0.751107	0.29489	-2.54707	0.010863	0.042787
RHOH	204.381	-0.750708	0.290482	-2.58436	0.00975611	0.0396011
LZTS1	258.831	-0.749905	0.305006	-2.45866	0.0139457	0.0512312
ANKRD53	7.78445	-0.749813	0.326345	-2.29761	0.0215842	0.070201
SELENBP1	454.433	-0.749296	0.325831	-2.29965	0.0214682	0.0699521
DGKZ	1021.1	-0.749174	0.130497	-5.74092	9.42e-09	2.68e-06
CYTIP	389.499	-0.748561	0.273072	-2.74126	0.00612038	0.028525
MAMSTR	65.8756	-0.74841	0.263075	-2.84485	0.00444321	0.0227687
GHRLOS	10.4486	-0.748129	0.239508	-3.1236	0.00178652	0.0120648
RPS6	27787.1	-0.747638	0.183856	-4.06643	4.77e-05	0.000939167
KCNN4	263.68	-0.746841	0.244055	-3.06013	0.00221238	0.0139973
ATP5EP2	278.523	-0.746403	0.179881	-4.14943	3.33e-05	0.000735472
BCL2L14	69.6376	-0.746039	0.337026	-2.2136	0.0268566	0.0823988
NUDT11	192.28	-0.745737	0.349846	-2.13162	0.0330385	0.0955007
ABI3	354.574	-0.745345	0.237708	-3.13555	0.00171534	0.0117013
C4orf48	33.5146	-0.745065	0.292017	-2.55144	0.0107279	0.042374
ZFP82	33.9894	-0.744673	0.298149	-2.49766	0.0125017	0.0473592
C22orf31	6.95949	-0.744257	0.338436	-2.1991	0.0278706	0.0847629
RPL27A	7622.84	-0.743434	0.169551	-4.38472	1.16e-05	0.000367128
ACYP1	186.934	-0.743397	0.210383	-3.53353	0.000410045	0.00434509
ACOT4	98.1617	-0.742832	0.211047	-3.51975	0.000431957	0.00448213
CD6	424.461	-0.742599	0.295713	-2.51121	0.0120317	0.0460931
ZNF488	224.784	-0.741991	0.312407	-2.37508	0.0175452	0.0604911
RPL23A	2200.21	-0.740866	0.156613	-4.73055	2.24e-06	0.000115973
ECT2L	7.36598	-0.740288	0.274338	-2.69846	0.00696621	0.0311222
MAPK11	377.893	-0.739797	0.1784	-4.14684	3.37e-05	0.00074019
DDAH2	743.393	-0.739582	0.171322	-4.31692	1.58e-05	0.000444941
CCL5	2257.5	-0.738853	0.34489	-2.14229	0.0321703	0.0937299
NECAB3	381.819	-0.738853	0.198815	-3.71629	0.000202168	0.00261407
FUZ	282.334	-0.738823	0.252393	-2.92728	0.00341943	0.0188955
KLHDC1	26.7411	-0.738288	0.230845	-3.1982	0.00138289	0.01001
IPCEF1	127.427	-0.738189	0.275561	-2.67886	0.00738729	0.0324732
SAP30	263.476	-0.737649	0.159894	-4.61337	3.96e-06	0.000172019
KCNC4	251.5	-0.737532	0.234227	-3.14879	0.00163948	0.0113305
CEMP1	184.975	-0.737186	0.209414	-3.52023	0.000431168	0.00447648
E2F5	98.8576	-0.735686	0.255156	-2.88327	0.00393564	0.0208856
PFN4	3.47437	-0.735366	0.329547	-2.23144	0.0256518	0.0796623
HLA.DRB5	2659.23	-0.735194	0.311746	-2.35831	0.0183583	0.0623387
NR1H3	371.364	-0.734579	0.232266	-3.16267	0.00156331	0.0109434
DOK2	270.767	-0.734174	0.25358	-2.89524	0.00378874	0.0202787
ADAMTS10	64.4277	-0.733308	0.262593	-2.79256	0.00522924	0.0255063
ITIH5	309.622	-0.733131	0.33929	-2.16078	0.0307121	0.0907211
FERMT3	677.262	-0.732846	0.260085	-2.81772	0.00483665	0.0240847
C20orf112	395.154	-0.732757	0.257933	-2.84088	0.00449892	0.0229389
RUNX3	1343.9	-0.732704	0.227133	-3.22588	0.00125584	0.00940588
FAM113B	209.453	-0.732522	0.23216	-3.15525	0.0016036	0.0111371
CLDN11	42.0138	-0.732034	0.334634	-2.18757	0.0287012	0.0865174
MTMR7	50.8094	-0.732025	0.255915	-2.86043	0.00423074	0.0220058
MST1P2	74.1196	-0.731849	0.306735	-2.38594	0.0170357	0.0593142
LRRC48	23.5819	-0.731761	0.27717	-2.64012	0.00828763	0.0353627
NCRNA00201	539.029	-0.731528	0.20976	-3.48745	0.000487643	0.00488843
TMEM176A	430.567	-0.73143	0.251816	-2.90462	0.00367704	0.0198115
LAPTM5	4252.78	-0.731372	0.245532	-2.97872	0.00289457	0.0168881
KCND1	84.5174	-0.731363	0.241781	-3.0249	0.00248713	0.0151853
RECQL4	1123.51	-0.730281	0.205011	-3.56215	0.000367826	0.00405294
C9orf163	11.6607	-0.72829	0.246029	-2.96018	0.00307464	0.0176333
ORAI2	823.237	-0.728206	0.213777	-3.40638	0.000658294	0.0060319
RABAC1	1341.85	-0.727158	0.151514	-4.79929	1.59e-06	9.15e-05
WDR78	29.9121	-0.726951	0.311373	-2.33467	0.0195609	0.065357
TLCD1	222.453	-0.726644	0.189516	-3.83422	0.000125965	0.00188999
SAC3D1	462.852	-0.726152	0.176513	-4.11387	3.89e-05	0.000819964
TMEM52	65.8594	-0.725686	0.305329	-2.37673	0.0174668	0.0603114
C7orf61	8.75313	-0.725599	0.2808	-2.58404	0.009765	0.0396284
ANKS3	242.224	-0.725352	0.152431	-4.75856	1.95e-06	0.000106926
GSDMD	1743.15	-0.725128	0.174501	-4.15545	3.25e-05	0.000721442
LSMD1	673.538	-0.725079	0.175758	-4.12545	3.7e-05	0.000792536
FMNL1	821.985	-0.724508	0.22429	-3.23023	0.00123692	0.00929848
C10orf35	200.094	-0.724149	0.173358	-4.17719	2.95e-05	0.000671376
TCTEX1D1	5.01853	-0.723924	0.3351	-2.16032	0.0307476	0.0907823
SLMO1	50.6637	-0.723729	0.270967	-2.67092	0.00756444	0.0330933
RPS20	15443.4	-0.723725	0.179219	-4.03821	5.39e-05	0.00101701
PFDN5	3547.86	-0.723328	0.135655	-5.3321	9.71e-08	1.32e-05
RNASEH2B	555.268	-0.72314	0.132412	-5.4613	4.73e-08	8.33e-06
SLAMF1	88.2953	-0.722779	0.310568	-2.32728	0.0199503	0.0663021
ABLIM2	408.603	-0.722605	0.301012	-2.40058	0.016369	0.0575172
C19orf20	106.861	-0.722396	0.227859	-3.17037	0.00152245	0.0107455
ZNF775	107.288	-0.722395	0.205548	-3.51448	0.000440621	0.00454374
TFPT	311.41	-0.722042	0.150093	-4.81062	1.5e-06	8.89e-05
GBGT1	75.1062	-0.721015	0.199486	-3.61436	0.000301092	0.00352299
SNHG7	476.973	-0.720157	0.215721	-3.33837	0.000842715	0.00719329
C6orf48	1324.58	-0.719972	0.176774	-4.07285	4.64e-05	0.000920558
HCK	646.896	-0.719873	0.261159	-2.75645	0.00584321	0.0276693
LOC100288778	466.894	-0.719208	0.18349	-3.91959	8.87e-05	0.00145075
FLJ10661	11.5142	-0.719126	0.264411	-2.71973	0.00653348	0.0298359
C9orf96	4.84338	-0.718858	0.261546	-2.74849	0.00598701	0.028118
C12orf62	657.07	-0.718775	0.153546	-4.68118	2.85e-06	0.00013835
TCIRG1	1685.93	-0.718495	0.153241	-4.68865	2.75e-06	0.000133747
RPL13A	10521.6	-0.71833	0.169453	-4.23912	2.24e-05	0.00055673
CIITA	654.579	-0.718122	0.265354	-2.70628	0.00680408	0.0306669
LAIR1	368.338	-0.717929	0.266762	-2.69127	0.00711799	0.0316461
LPXN	427.187	-0.716991	0.234037	-3.06359	0.00218701	0.0138894
SUGT1L1	14.7204	-0.716937	0.188093	-3.81161	0.000138067	0.00200116
RPLP2	11205.9	-0.716662	0.175088	-4.09315	4.26e-05	0.000871806
S1PR4	129.764	-0.716504	0.29134	-2.45934	0.0139193	0.051171
CARD16	162.292	-0.716436	0.220147	-3.25435	0.0011365	0.0087701
C7orf53	13.2275	-0.716346	0.291206	-2.45993	0.0138963	0.0511315
TBX21	48.3145	-0.715778	0.329069	-2.17516	0.0296183	0.0884161
RPS11	20311.1	-0.715732	0.164954	-4.33897	1.43e-05	0.000414645
DYNLRB1	2597.52	-0.715547	0.181356	-3.94553	7.96e-05	0.00136052
TCEAL3	259.004	-0.715393	0.221766	-3.22589	0.00125583	0.00940588
C1QB	3105.75	-0.714814	0.319237	-2.23914	0.025147	0.0784266
LOC648740	7.45127	-0.714755	0.33605	-2.12693	0.0334256	0.0963287
ZNF692	425.652	-0.714356	0.180245	-3.96324	7.39e-05	0.00128621
RPS17	13548	-0.713613	0.176639	-4.03996	5.35e-05	0.00101261
RP9	146.271	-0.712824	0.136312	-5.22937	1.7e-07	1.94e-05
PRAF2	492.171	-0.712047	0.198095	-3.59448	0.00032504	0.00370392
CCDC88B	601.867	-0.712025	0.249891	-2.84934	0.004381	0.0225444
PCBD1	699.273	-0.711289	0.142512	-4.99107	6e-07	4.83e-05
SNTB1	213.886	-0.711261	0.242449	-2.93366	0.00334994	0.0186634
FHAD1	41.7844	-0.711133	0.256551	-2.77189	0.00557317	0.026682
CYBA	2321.33	-0.710877	0.199863	-3.55681	0.000375381	0.00411393
C17orf49	1526.16	-0.710413	0.13251	-5.36119	8.27e-08	1.19e-05
SCO2	1511.97	-0.709891	0.209628	-3.38644	0.000708065	0.00635801
LOC100130872	19.7478	-0.709779	0.272704	-2.60275	0.00924799	0.038151
GPX4	3589.5	-0.709744	0.191576	-3.70477	0.00021158	0.0026921
KIAA1683	76.3875	-0.709587	0.311535	-2.27771	0.0227437	0.0729383
PSTPIP2	523.922	-0.709561	0.211435	-3.35593	0.000790976	0.00688957
RPL41	18491.3	-0.709091	0.164354	-4.31442	1.6e-05	0.000448108
RAB37	77.7871	-0.708966	0.29842	-2.37573	0.0175141	0.0604519
NCRNA00181	70.4646	-0.708715	0.220608	-3.21256	0.00131558	0.00973809
EDF1	5104.04	-0.70852	0.156822	-4.51799	6.24e-06	0.000234083
EFCAB6	22.1957	-0.708258	0.272459	-2.5995	0.00933586	0.0383868
PPP1R3F	131.402	-0.708199	0.179967	-3.93517	8.31e-05	0.00140634
PVRIG	126.207	-0.707803	0.256238	-2.76228	0.00573988	0.0272856
CD53	976.474	-0.707497	0.277627	-2.54837	0.0108228	0.0426601
CD33	45.3383	-0.707317	0.27579	-2.56469	0.0103267	0.0412415
CBR3	711.078	-0.70729	0.242531	-2.91628	0.00354227	0.0193104
LOC100131434	25.1274	-0.706704	0.269523	-2.62205	0.00874019	0.0367056
MAD2L2	807.524	-0.706256	0.16766	-4.21244	2.53e-05	0.000603429
TSPAN33	368.323	-0.706059	0.227712	-3.10066	0.00193087	0.0126709
C22orf41	6.27928	-0.705838	0.32238	-2.18946	0.0285638	0.0863154
GADD45B	545.762	-0.705819	0.193836	-3.64132	0.000271239	0.00326072
ACOT1	237.529	-0.705346	0.197862	-3.56483	0.000364089	0.00402994
ELL3	198.698	-0.704996	0.205677	-3.42769	0.000608742	0.0057091
LRRN3	22.2634	-0.704917	0.293493	-2.40182	0.0163139	0.0573677
GAS6	1985.58	-0.704615	0.233514	-3.01744	0.00254919	0.0154757
DNM1P35	19.6289	-0.704614	0.22646	-3.11143	0.00186183	0.0123841
GRASP	120.834	-0.704346	0.244942	-2.87556	0.00403314	0.0212615
CCDC30	24.7449	-0.703015	0.209789	-3.35106	0.000805034	0.00697227
CLK4	396.436	-0.702974	0.178908	-3.92925	8.52e-05	0.00142873
LOC100270804	21.5394	-0.70246	0.255531	-2.74903	0.00597725	0.0280935
MST1	58.9524	-0.702244	0.280397	-2.50447	0.0122636	0.0467372
FAM124A	15.0048	-0.701608	0.312908	-2.24222	0.0249474	0.0780164
GOLGA2B	158.562	-0.700879	0.231315	-3.02997	0.00244576	0.0150061
PECI	535.966	-0.70067	0.194124	-3.6094	0.000306907	0.00357906
WHAMML2	15.7749	-0.700488	0.322725	-2.17054	0.029966	0.0891638
C16orf45	101.852	-0.700321	0.275481	-2.54218	0.0110164	0.0432147
AGBL2	12.7566	-0.700245	0.290296	-2.41217	0.0158577	0.0561079
ATP6V0E2	450.581	-0.700244	0.258156	-2.71249	0.00667802	0.0303148
BIN2	235.754	-0.700243	0.256693	-2.72793	0.00637323	0.0293232
CUEDC2	909.205	-0.700064	0.144254	-4.853	1.22e-06	7.73e-05
FAM50A	1622.44	-0.699815	0.170161	-4.11266	3.91e-05	0.000821811
ARHGAP33	266.466	-0.699788	0.22603	-3.096	0.00196153	0.0128216
C4A	1344.15	-0.699331	0.323125	-2.16427	0.0304435	0.0901455
IQGAP2	241.782	-0.69911	0.310715	-2.25	0.0244488	0.0768504
RPL13AP20	50.1303	-0.698573	0.191475	-3.64838	0.000263899	0.00320649
ETV2	20.057	-0.698545	0.20838	-3.35227	0.00080151	0.00694831
MMP9	2792.12	-0.698149	0.329811	-2.11681	0.0342759	0.0980265
RAB26	74.355	-0.697439	0.314387	-2.21841	0.0265268	0.081784
TMOD1	197.306	-0.697033	0.275532	-2.52977	0.0114136	0.0443367
C12orf69	2.34847	-0.696812	0.322456	-2.16095	0.0306989	0.0906967
THAP3	304.735	-0.696376	0.144075	-4.83343	1.34e-06	8.23e-05
POLR2I	653.529	-0.696231	0.162681	-4.27973	1.87e-05	0.000495202
CIB2	153.189	-0.696026	0.245202	-2.83858	0.00453144	0.0230372
SIGLEC10	255.551	-0.695622	0.28524	-2.43872	0.0147392	0.0532919
GIMAP7	223.473	-0.695033	0.275137	-2.52614	0.0115325	0.0446564
NA..27	690.471	-0.694966	0.145024	-4.79206	1.65e-06	9.34e-05
CRYGS	23.2958	-0.694883	0.294448	-2.35995	0.0182772	0.0621615
FA2H	201.198	-0.694328	0.304315	-2.28161	0.0225125	0.0723818
PSME2	2780.91	-0.694151	0.181574	-3.82296	0.000131858	0.00194969
MYO1F	518.225	-0.693953	0.242645	-2.85996	0.00423701	0.0220312
EXOC3L	63.3692	-0.693755	0.1644	-4.21991	2.44e-05	0.000591179
C8orf59	599.687	-0.693692	0.15882	-4.36778	1.26e-05	0.000381018
CHCHD6	318.082	-0.693621	0.230181	-3.01338	0.00258359	0.0155977
ZBTB46	144.934	-0.693468	0.276532	-2.50773	0.012151	0.0464432
CAMK1	183.081	-0.693104	0.16758	-4.13596	3.53e-05	0.000763348
ZNF37B	261.519	-0.692658	0.201442	-3.4385	0.00058494	0.00555981
SVIP	242.902	-0.692484	0.261041	-2.65277	0.00798333	0.0344329
B9D2	159.458	-0.692422	0.169056	-4.0958	4.21e-05	0.000863999
ODF3B	316.645	-0.692186	0.210787	-3.28382	0.00102411	0.00819601
TCEAL6	16.45	-0.692177	0.246022	-2.81347	0.00490096	0.0243066
MRPL52	919.077	-0.691092	0.158497	-4.36027	1.3e-05	0.0003879
SP6	239.812	-0.691071	0.252428	-2.73769	0.00618717	0.0287194
LOC100272228	20.8992	-0.690755	0.253159	-2.72854	0.00636154	0.0292915
CD63	8240.93	-0.690734	0.131839	-5.2392	1.61e-07	1.88e-05
GABBR1	268.683	-0.690311	0.257927	-2.67638	0.00744214	0.0326596
ATPIF1	1824.34	-0.690109	0.150108	-4.59742	4.28e-06	0.000179474
CXorf21	41.1701	-0.689959	0.287573	-2.39925	0.0164287	0.0576717
CAMK1G	7.99221	-0.689769	0.29913	-2.30592	0.0211153	0.0691584
ATF7IP2	142.821	-0.68971	0.262747	-2.625	0.00866487	0.0364716
MDK	5527.07	-0.689646	0.26009	-2.65157	0.0080119	0.0345318
ACAT1	527.834	-0.689607	0.20503	-3.36344	0.000769775	0.00675949
RARRES3	839.692	-0.68922	0.287899	-2.39396	0.0166674	0.0583199
ASCL2	205.789	-0.688839	0.290026	-2.3751	0.0175444	0.0604911
HSD11B1L	133.446	-0.688791	0.289313	-2.38078	0.0172761	0.0598456
PABPC1L	222.128	-0.688378	0.27141	-2.5363	0.0112029	0.0436848
NDUFB11	2254.01	-0.687693	0.175929	-3.90891	9.27e-05	0.00150298
HEXIM2	123.075	-0.687616	0.171896	-4.00019	6.33e-05	0.00115124
MAP3K14	1040.01	-0.687603	0.226439	-3.0366	0.00239265	0.0147758
HLA.B	51673.7	-0.687348	0.251066	-2.73772	0.00618663	0.0287194
C21orf58	216.133	-0.687109	0.205158	-3.34917	0.000810527	0.0070033
ZNF524	406.011	-0.686769	0.14985	-4.58303	4.58e-06	0.000187984
C21orf2	351.385	-0.686483	0.16789	-4.08888	4.33e-05	0.000883408
ATP8B5P	31.2063	-0.685941	0.168754	-4.06473	4.81e-05	0.000943004
CETP	17.4212	-0.685887	0.309928	-2.21306	0.0268938	0.0824991
ZNF579	186.674	-0.685821	0.17225	-3.98154	6.85e-05	0.00122359
TNFRSF4	122.629	-0.685811	0.244873	-2.80068	0.00509943	0.0250598
CENPM	636.137	-0.68548	0.201638	-3.39957	0.00067493	0.00614395
QPCT	139.003	-0.684996	0.255399	-2.68206	0.00731703	0.0322365
CCDC84	94.8374	-0.684602	0.180983	-3.7827	0.000155139	0.00218301
CXCR6	269.999	-0.684345	0.310153	-2.20647	0.0273509	0.0835519
CCDC106	288.463	-0.684059	0.202639	-3.37575	0.00073614	0.00653614
RSAD1	486.124	-0.683695	0.129381	-5.28436	1.26e-07	1.58e-05
GNGT2	41.0143	-0.683356	0.251796	-2.71393	0.00664907	0.0302208
RPLP1	24791.8	-0.683267	0.173223	-3.94443	8e-05	0.00136431
BAD	1181.28	-0.683082	0.159656	-4.27848	1.88e-05	0.000496286
SASH3	655.256	-0.683057	0.294946	-2.31588	0.0205651	0.0677314
SLA2	141.941	-0.682914	0.311812	-2.19015	0.0285134	0.0862059
HHEX	119.204	-0.682401	0.204179	-3.34217	0.00083126	0.00711206
DKFZP686I15217	22.2898	-0.681697	0.172019	-3.96292	7.4e-05	0.00128671
DFFB	128.285	-0.681372	0.181338	-3.75747	0.00017164	0.00234853
LOC339047	717.945	-0.681342	0.157875	-4.3157	1.59e-05	0.000446721
CD83	582.773	-0.681061	0.219599	-3.10139	0.00192615	0.012658
COMMD6	997.309	-0.680674	0.142113	-4.78968	1.67e-06	9.37e-05
APH1B	146.819	-0.680171	0.168388	-4.03931	5.36e-05	0.00101436
RPS3A	4318.67	-0.679715	0.164295	-4.13717	3.52e-05	0.000762041
AGAP6	91.774	-0.679012	0.176298	-3.85151	0.000117392	0.00179365
EMP3	651.094	-0.678893	0.197588	-3.4359	0.000590591	0.00559034
MACROD1	273.988	-0.678111	0.206142	-3.28954	0.00100353	0.00807926
LOC645431	14.3941	-0.67808	0.272713	-2.48643	0.0129033	0.0484005
NAALADL1	42.0054	-0.677692	0.236304	-2.86788	0.00413231	0.0216598
ZFP2	8.8144	-0.677433	0.26145	-2.59106	0.00956814	0.0390543
LRRC27	85.5306	-0.67725	0.143044	-4.73456	2.2e-06	0.000115004
PODXL	1605.99	-0.676869	0.288664	-2.34483	0.0190356	0.0640988
WHAMML1	37.6772	-0.676816	0.264948	-2.55452	0.0106333	0.0420722
POLN	7.33136	-0.676449	0.274529	-2.46403	0.0137384	0.0506828
ZNF154	12.9704	-0.676023	0.26417	-2.55905	0.0104958	0.0416629
NTHL1	313.424	-0.675924	0.186899	-3.61652	0.000298586	0.00350485
CUTA	1746.21	-0.675749	0.156629	-4.31434	1.6e-05	0.000448108
HAVCR2	346.238	-0.67476	0.250879	-2.68958	0.00715419	0.0317531
ZNF238	615.611	-0.674433	0.215637	-3.12763	0.00176224	0.0119391
CCDC146	258.822	-0.674296	0.252982	-2.66539	0.00768997	0.0334827
ITGB7	442.285	-0.674258	0.248197	-2.71663	0.00659507	0.0300275
SNAI3	40.7277	-0.673894	0.263064	-2.56171	0.0104159	0.0414444
RPL17	2205.06	-0.67349	0.170113	-3.95906	7.52e-05	0.00130275
CADPS2	376.286	-0.673398	0.212231	-3.17294	0.00150903	0.0106744
MYL5	138.978	-0.673383	0.206558	-3.26002	0.00111405	0.0086698
ST3GAL5	227.946	-0.673303	0.244153	-2.75771	0.00582076	0.0275762
PILRA	126.379	-0.673298	0.273702	-2.45997	0.0138947	0.0511315
LRDD	629.05	-0.672508	0.165154	-4.07201	4.66e-05	0.000922866
GRAP	140.811	-0.672202	0.247461	-2.71639	0.00659979	0.0300415
SLC44A3	160.423	-0.671859	0.219717	-3.05784	0.00222938	0.0140815
GSDMB	259.564	-0.671319	0.265384	-2.52961	0.0114189	0.0443475
NPHP1	50.4926	-0.671242	0.257618	-2.60557	0.00917217	0.0379449
C11orf52	80.2328	-0.670333	0.258757	-2.59059	0.00958124	0.0390904
SLC7A7	351.443	-0.670267	0.258232	-2.5956	0.0094427	0.0386795
TMEM176B	1010.17	-0.67016	0.273859	-2.4471	0.0144013	0.0524423
SOX18	225.412	-0.670053	0.267928	-2.50087	0.0123888	0.0470305
PRRT3	93.4007	-0.669715	0.230016	-2.9116	0.00359583	0.0194885
RANGRF	384.631	-0.669286	0.160144	-4.17928	2.92e-05	0.000669067
FOXD4L1	9.55334	-0.669276	0.238647	-2.80446	0.00504003	0.0248278
GJA9	13.5122	-0.669034	0.215662	-3.10223	0.00192067	0.0126447
COX6C	2420.2	-0.668919	0.182887	-3.65756	0.000254623	0.00312066
APOBEC3F	343.675	-0.668786	0.217488	-3.07505	0.00210469	0.0134928
ZNF826	3.79984	-0.667893	0.282432	-2.3648	0.01804	0.0616104
C1orf203	42.7042	-0.667601	0.159682	-4.18082	2.9e-05	0.000668216
TNFRSF1B	1546.89	-0.667001	0.222232	-3.00137	0.0026877	0.0160675
EBF1	123.935	-0.66675	0.311591	-2.13983	0.0323688	0.094069
TPM1	1905.99	-0.665979	0.290863	-2.28967	0.0220407	0.0712477
PHLDA3	2134.2	-0.665442	0.18281	-3.64007	0.000272561	0.00327027
GJC2	30.6309	-0.665037	0.233853	-2.84383	0.00445746	0.0228011
DYRK4	235.002	-0.664708	0.189953	-3.49933	0.000466427	0.00473005
DHRSX	384.676	-0.664654	0.179013	-3.71288	0.000204912	0.00263469
TMEM86B	110.278	-0.66464	0.171015	-3.88645	0.000101722	0.00160505
SMARCD3	127.457	-0.663577	0.295322	-2.24696	0.0246424	0.0773476
ARRB1	245.123	-0.663577	0.226432	-2.93058	0.00338335	0.0187445
TMEM121	25.3321	-0.663538	0.26376	-2.51568	0.0118802	0.045646
PTCH2	12.6214	-0.66349	0.273383	-2.42696	0.0152258	0.0546098
TCEAL1	176.697	-0.662758	0.150589	-4.40111	1.08e-05	0.000347662
NUDT1	841.192	-0.662623	0.178416	-3.71391	0.000204078	0.00262765
RPS25	3904.29	-0.662435	0.170419	-3.8871	0.000101448	0.00160349
MRPL23	964.561	-0.662412	0.162608	-4.07367	4.63e-05	0.000920285
PECAM1	709.115	-0.661753	0.19554	-3.38423	0.000713773	0.00638703
KIAA0649	773.012	-0.661336	0.216172	-3.05931	0.00221847	0.0140261
FRS3	103.09	-0.661171	0.140308	-4.7123	2.45e-06	0.00012475
LY6K	1139.34	-0.660416	0.242525	-2.72309	0.00646748	0.0296379
LCK	471.761	-0.659946	0.269241	-2.45113	0.0142407	0.0521163
MMP25	106.526	-0.659899	0.242127	-2.72543	0.00642185	0.0294878
C5orf32	581.484	-0.659385	0.201937	-3.2653	0.00109349	0.00856952
C4orf52	306.862	-0.659247	0.13137	-5.01824	5.21e-07	4.35e-05
CCDC46	61.6404	-0.659118	0.257181	-2.56286	0.0103815	0.0413795
RIPK3	185.288	-0.658427	0.176714	-3.72594	0.000194589	0.00254479
STAMBPL1	172.409	-0.658218	0.186898	-3.52181	0.000428612	0.00446328
CCNO	135.369	-0.658135	0.243401	-2.70392	0.00685275	0.0307957
CIDECP	98.083	-0.658061	0.13328	-4.93742	7.92e-07	5.67e-05
DHRS4L1	16.1747	-0.657801	0.220773	-2.97954	0.00288681	0.0168619
STAB1	901.58	-0.657762	0.209076	-3.14605	0.00165493	0.0113979
ZNF444	427.061	-0.657684	0.130946	-5.02254	5.1e-07	4.27e-05
RNASEH2C	668.28	-0.656991	0.161762	-4.06146	4.88e-05	0.000952223
RPL8	37997.8	-0.656843	0.196542	-3.342	0.000831779	0.00711318
RPL13	14312.7	-0.656664	0.178813	-3.67234	0.000240335	0.00297935
TLR7	78.3999	-0.656507	0.309396	-2.1219	0.033846	0.0971
FLJ10357	466.559	-0.656495	0.206705	-3.176	0.00149319	0.0105951
SDSL	136.55	-0.65625	0.221538	-2.96225	0.00305404	0.0175505
MTCP1NB	327.284	-0.6562	0.184287	-3.56075	0.000369803	0.00406983
C3orf18	48.2281	-0.656161	0.197152	-3.3282	0.000874093	0.00737152
LOC541471	194.507	-0.656084	0.177737	-3.69132	0.000223092	0.00281126
KMO	39.0582	-0.655967	0.28767	-2.28028	0.0225912	0.072559
RILPL2	482.527	-0.655965	0.166864	-3.93114	8.45e-05	0.00142082
SHF	68.0202	-0.655882	0.2428	-2.70133	0.00690628	0.0309222
GPX7	201.099	-0.655861	0.223114	-2.93957	0.00328666	0.0184453
LOC100286793	101.545	-0.655839	0.160757	-4.0797	4.51e-05	0.000905577
PTTG1	2154.12	-0.655804	0.192651	-3.4041	0.000663822	0.00606721
C19orf70	888.487	-0.655317	0.184148	-3.55863	0.000372789	0.00409434
ZNF22	548.315	-0.654978	0.158223	-4.13959	3.48e-05	0.000756721
SLCO2B1	763.226	-0.654531	0.281993	-2.32109	0.0202819	0.0670516
GLRX	370.601	-0.654091	0.168527	-3.88122	0.000103932	0.00163149
RPS4X	22734.2	-0.653722	0.199813	-3.27167	0.00106915	0.00845314
CYP4V2	303.497	-0.653694	0.214232	-3.05134	0.00227821	0.0142929
FCGR3A	1045.15	-0.65312	0.303782	-2.14997	0.0315578	0.0924302
CSF1R	1056.98	-0.653045	0.257166	-2.53939	0.0111046	0.0433936
LMF1	194.434	-0.652836	0.175761	-3.71434	0.000203736	0.00262693
RND1	107.906	-0.652462	0.250125	-2.60854	0.00909282	0.0377273
ZRSR2	180.914	-0.652382	0.147904	-4.41085	1.03e-05	0.000335914
CAPN12	154.215	-0.651645	0.211037	-3.08783	0.00201624	0.0130848
GUCA1B	16.4827	-0.650721	0.261607	-2.4874	0.0128682	0.0483481
NPC2	3338.39	-0.65063	0.137045	-4.74756	2.06e-06	0.000110701
STBD1	207.292	-0.650316	0.246711	-2.63594	0.00839049	0.0356542
CTU1	83.6154	-0.650292	0.181991	-3.5732	0.000352639	0.00393017
PSMB10	1902.56	-0.650019	0.198011	-3.28274	0.00102802	0.00821486
DOK3	224.015	-0.64941	0.240793	-2.69696	0.00699757	0.0312319
CD40	850.902	-0.649036	0.211847	-3.06371	0.00218611	0.0138885
COQ10A	151.965	-0.648327	0.153905	-4.21251	2.53e-05	0.000603429
RAB4B	546.583	-0.648311	0.151872	-4.2688	1.97e-05	0.000509133
FAM82A1	64.3596	-0.648222	0.175798	-3.68731	0.000226639	0.00283841
RNASEK	1945	-0.646907	0.128512	-5.03381	4.81e-07	4.14e-05
SP140	182.292	-0.64654	0.303884	-2.12759	0.0333711	0.0962346
TRIM69	27.7257	-0.646375	0.214556	-3.01262	0.00259001	0.0156313
EVI2A	207.742	-0.645985	0.260138	-2.48324	0.0130194	0.048637
LOC728855	190.742	-0.645896	0.189743	-3.40407	0.000663908	0.00606721
RALY	5628.08	-0.645862	0.178998	-3.60821	0.000308318	0.00358973
GTF3A	1830.33	-0.645833	0.145994	-4.42368	9.7e-06	0.000321287
C17orf67	26.1803	-0.645323	0.170063	-3.7946	0.00014788	0.00211387
C6orf108	553.666	-0.645111	0.179087	-3.60222	0.000315515	0.00364029
ECHDC2	593.565	-0.645011	0.183974	-3.506	0.000454899	0.00465175
[truncated: 4,460 more rows]
