# Supplementary material for: p63 Directs Subtype-Specific Gene Expression in HPV+ Head and Neck Squamous Cell Carcinoma
Source: Front Oncol. 2022 May 31;12:879054. doi: 10.3389/fonc.2022.879054 (PMC9192977; doi:10.3389/fonc.2022.879054)
Supplement: Supplementary file 3 [file Table_2.xlsx]

## Sheet: SCC104_4A4_dN_intersect
Chr	Start	End
chr1	942201	942702
chr1	961061	961562
chr1	1098382	1098883
chr1	1153166	1153667
chr1	1186188	1186689
chr1	1356627	1357128
chr1	1562501	1563002
chr1	1838494	1838995
chr1	1838838	1839339
chr1	1900352	1900853
chr1	2139209	2139710
chr1	2141376	2141877
chr1	2253475	2253976
chr1	2265753	2266254
chr1	2303213	2303714
chr1	2358845	2359346
chr1	2359849	2360350
chr1	2362570	2363071
chr1	3389759	3390260
chr1	3389759	3390260
chr1	3390101	3390602
chr1	3390101	3390602
chr1	3398576	3399077
chr1	3408260	3408761
chr1	3432755	3433256
chr1	3448038	3448539
chr1	3459280	3459781
chr1	3469957	3470458
chr1	3581499	3582000
chr1	3597552	3598053
chr1	3601801	3602302
chr1	3606919	3607420
chr1	3615190	3615691
chr1	3619073	3619574
chr1	3623713	3624214
chr1	3628398	3628899
chr1	3633424	3633925
chr1	3773808	3774309
chr1	4762843	4763344
chr1	4897801	4898302
chr1	5712220	5712721
chr1	6318608	6319109
chr1	6354443	6354944
chr1	6354854	6355355
chr1	6361479	6361980
chr1	6410397	6410898
chr1	6427600	6428101
chr1	6474501	6475002
chr1	6475507	6476008
chr1	6548640	6549141
chr1	6549027	6549528
chr1	6647484	6647985
chr1	6648079	6648580
chr1	6669408	6669909
chr1	6803880	6804381
chr1	6978577	6979078
chr1	7529032	7529533
chr1	7615915	7616416
chr1	7630261	7630762
chr1	7632595	7633096
chr1	8064719	8065220
chr1	8066288	8066789
chr1	8077414	8077915
chr1	8193985	8194486
chr1	8411889	8412390
chr1	8600261	8600762
chr1	8971516	8972017
chr1	9145589	9146090
chr1	9241960	9242461
chr1	9494974	9495475
chr1	9653784	9654285
chr1	9818430	9818931
chr1	9885477	9885978
chr1	9894484	9894985
chr1	9942397	9942898
chr1	9950299	9950800
chr1	9951075	9951576
chr1	9953268	9953769
chr1	10123839	10124340
chr1	10143129	10143630
chr1	10516652	10517153
chr1	10555941	10556442
chr1	10695227	10695728
chr1	10695995	10696496
chr1	10878575	10879076
chr1	10980252	10980753
chr1	10980498	10980999
chr1	11086064	11086565
chr1	12039728	12040229
chr1	12041652	12042153
chr1	12206326	12206827
chr1	12292275	12292776
chr1	12496941	12497442
chr1	12538373	12538874
chr1	12678263	12678764
chr1	13910413	13910914
chr1	13912411	13912912
chr1	13913678	13914179
chr1	13990788	13991289
chr1	14010662	14011163
chr1	14463861	14464362
chr1	14464574	14465075
chr1	14516932	14517433
chr1	15039482	15039983
chr1	15059527	15060028
chr1	15085424	15085925
chr1	15207544	15208045
chr1	15237949	15238450
chr1	15240116	15240617
chr1	15681578	15682079
chr1	15727089	15727590
chr1	16007363	16007864
chr1	16007885	16008386
chr1	16007885	16008386
chr1	16008176	16008677
chr1	16008176	16008677
chr1	16092251	16092752
chr1	16125494	16125995
chr1	16126443	16126944
chr1	16157292	16157793
chr1	16158492	16158993
chr1	16159700	16160201
chr1	16249766	16250267
chr1	16449294	16449795
chr1	16450201	16450702
chr1	16482348	16482849
chr1	16500039	16500540
chr1	16511063	16511564
chr1	16514673	16515174
chr1	16626913	16627414
chr1	16723024	16723525
chr1	17251998	17252499
chr1	17255873	17256374
chr1	17255873	17256374
chr1	17274898	17275399
chr1	17541864	17542365
chr1	17571675	17572176
chr1	17585186	17585687
chr1	17613767	17614268
chr1	17616197	17616698
chr1	17767617	17768118
chr1	17769884	17770385
chr1	17786827	17787328
chr1	17908463	17908964
chr1	19249353	19249854
chr1	19360303	19360804
chr1	19399734	19400235
chr1	19400600	19401101
chr1	19401347	19401848
chr1	19409506	19410007
chr1	19687592	19688093
chr1	19944873	19945374
chr1	20085429	20085930
chr1	20251977	20252478
chr1	20682524	20683025
chr1	21062082	21062583
chr1	21682474	21682975
chr1	21849960	21850461
chr1	21890555	21891056
chr1	22109929	22110430
chr1	22114441	22114942
chr1	22259853	22260354
chr1	22260259	22260760
chr1	22283360	22283861
chr1	22369609	22370110
chr1	22463831	22464332
chr1	22468599	22469100
chr1	22503675	22504176
chr1	22561108	22561609
chr1	22565774	22566275
chr1	22580244	22580745
chr1	23156629	23157130
chr1	23158467	23158968
chr1	23449252	23449753
chr1	23493858	23494359
chr1	23703798	23704299
chr1	23915389	23915890
chr1	23919020	23919521
chr1	23919313	23919814
chr1	23988307	23988808
chr1	24191904	24192405
chr1	24446812	24447313
chr1	24522324	24522825
chr1	24611574	24612075
chr1	24612936	24613437
chr1	24643459	24643960
chr1	24691498	24691999
chr1	24705957	24706458
chr1	24706252	24706753
chr1	24745357	24745858
chr1	25520910	25521411
chr1	25888840	25889341
chr1	25894707	25895208
chr1	26197879	26198380
chr1	26262241	26262742
chr1	26604728	26605229
chr1	26625175	26625676
chr1	26656270	26656771
chr1	26678410	26678911
chr1	26871332	26871833
chr1	26947219	26947720
chr1	26960208	26960709
chr1	27181390	27181891
chr1	27185336	27185837
chr1	27188438	27188939
chr1	27191326	27191827
chr1	27220862	27221363
chr1	27487960	27488461
chr1	27573836	27574337
chr1	27669322	27669823
chr1	27808709	27809210
chr1	27848820	27849321
chr1	27852441	27852942
chr1	27854461	27854962
chr1	27869318	27869819
chr1	28045725	28046226
chr1	28497709	28498210
chr1	28568296	28568797
chr1	28678733	28679234
chr1	29211363	29211864
chr1	29565682	29566183
chr1	29575460	29575961
chr1	29680947	29681448
chr1	30047637	30048138
chr1	30049269	30049770
chr1	30056561	30057062
chr1	30182587	30183088
chr1	31091202	31091703
chr1	31122547	31123048
chr1	31575112	31575613
chr1	31592909	31593410
chr1	31593218	31593719
chr1	31643538	31644039
chr1	31869768	31870269
chr1	31889117	31889618
chr1	31907722	31908223
chr1	31939508	31940009
chr1	32038226	32038727
chr1	32039470	32039971
chr1	32040503	32041004
chr1	32041033	32041534
chr1	32103361	32103862
chr1	32135434	32135935
chr1	32184085	32184586
chr1	32362987	32363488
chr1	32532139	32532640
chr1	32645474	32645975
chr1	32959734	32960235
chr1	33190026	33190527
chr1	33195613	33196114
chr1	33225687	33226188
chr1	33228864	33229365
chr1	33246102	33246603
chr1	33429251	33429752
chr1	33454562	33455063
chr1	33454759	33455260
chr1	33457912	33458413
chr1	33458247	33458748
chr1	33470140	33470641
chr1	33617300	33617801
chr1	33686616	33687117
chr1	33793647	33794148
chr1	35220420	35220921
chr1	35220894	35221395
chr1	35542013	35542514
chr1	35551040	35551541
chr1	36300909	36301410
chr1	36636844	36637345
chr1	36977440	36977941
chr1	38430894	38431395
chr1	38492709	38493210
chr1	38582922	38583423
chr1	38583240	38583741
chr1	38978431	38978932
chr1	39054671	39055172
chr1	39070017	39070518
chr1	39197284	39197785
chr1	39199377	39199878
chr1	39578772	39579273
chr1	39649342	39649843
chr1	39741464	39741965
chr1	39741730	39742231
chr1	40266123	40266624
chr1	40294376	40294877
chr1	40316212	40316713
chr1	40418371	40418872
chr1	40426306	40426807
chr1	40435486	40435987
chr1	40435486	40435987
chr1	40435972	40436473
chr1	40435972	40436473
chr1	40480852	40481353
chr1	41177043	41177544
chr1	41352245	41352746
chr1	41352245	41352746
chr1	41352621	41353122
chr1	41352621	41353122
chr1	41364965	41365466
chr1	41472533	41473034
chr1	41472533	41473034
chr1	41472871	41473372
chr1	41472871	41473372
chr1	41511335	41511836
chr1	41788841	41789342
chr1	41823365	41823866
chr1	41823660	41824161
chr1	41823660	41824161
chr1	41824117	41824618
chr1	41939404	41939905
chr1	41940211	41940712
chr1	41947838	41948339
chr1	42083754	42084255
chr1	42144185	42144686
chr1	42145250	42145751
chr1	42268506	42269007
chr1	42268884	42269385
chr1	42269393	42269894
chr1	42631466	42631967
chr1	42639531	42640032
chr1	43402832	43403333
chr1	43406617	43407118
chr1	43407363	43407864
chr1	43408757	43409258
chr1	43473036	43473537
chr1	43487083	43487584
chr1	43487581	43488082
chr1	43514301	43514802
chr1	43618453	43618954
chr1	43664535	43665036
chr1	44015840	44016341
chr1	44029882	44030383
chr1	44047795	44048296
chr1	44051741	44052242
chr1	44132360	44132861
chr1	44177584	44178085
chr1	44232308	44232809
chr1	44232892	44233393
chr1	44350900	44351401
chr1	44380194	44380695
chr1	44403106	44403607
chr1	44456821	44457322
chr1	44459600	44460101
chr1	44792032	44792533
chr1	44793356	44793857
chr1	45265340	45265841
chr1	46023123	46023624
chr1	46078866	46079367
chr1	46417658	46418159
chr1	46440588	46441089
chr1	46543330	46543831
chr1	46648824	46649325
chr1	46684084	46684585
chr1	46987664	46988165
chr1	46989488	46989989
chr1	47077241	47077742
chr1	47791175	47791676
chr1	48262261	48262762
chr1	48484380	48484881
chr1	49341911	49342412
chr1	51069158	51069659
chr1	51076201	51076702
chr1	51171353	51171854
chr1	51559164	51559665
chr1	51780087	51780588
chr1	51780541	51781042
chr1	52058289	52058790
chr1	52102639	52103140
chr1	52159199	52159700
chr1	52294634	52295135
chr1	52675070	52675571
chr1	52714732	52715233
chr1	53387468	53387969
chr1	54468866	54469367
chr1	54480955	54481456
chr1	54633377	54633878
chr1	54752732	54753233
chr1	54788943	54789444
chr1	54794956	54795457
chr1	54950975	54951476
chr1	55007662	55008163
chr1	55008018	55008519
chr1	55081256	55081757
chr1	55525674	55526175
chr1	55751350	55751851
chr1	56999267	56999768
chr1	57284586	57285087
chr1	58310722	58311223
chr1	59038290	59038791
chr1	59058125	59058626
chr1	59083864	59084365
chr1	59228491	59228992
chr1	59245247	59245748
chr1	59280814	59281315
chr1	59398375	59398876
chr1	59441520	59442021
chr1	59481416	59481917
chr1	59573170	59573671
chr1	59840936	59841437
chr1	59899842	59900343
chr1	60062207	60062708
chr1	60062584	60063085
chr1	60139181	60139682
chr1	60139464	60139965
chr1	60195789	60196290
chr1	60230629	60231130
chr1	60763910	60764411
chr1	61607141	61607642
chr1	61804104	61804605
chr1	61984600	61985101
chr1	62051377	62051878
chr1	62071499	62072000
chr1	62072180	62072681
chr1	62698634	62699135
chr1	62706949	62707450
chr1	62742386	62742887
chr1	62824666	62825167
chr1	62862959	62863460
chr1	63963724	63964225
chr1	64013258	64013759
chr1	64379736	64380237
chr1	64449478	64449979
chr1	64728806	64729307
chr1	64809191	64809692
chr1	65643120	65643621
chr1	65650308	65650809
chr1	67005051	67005552
chr1	67041295	67041796
chr1	67399978	67400479
chr1	67518638	67519139
chr1	67813939	67814440
chr1	67821541	67822042
chr1	68041464	68041965
chr1	68100707	68101208
chr1	68152209	68152710
chr1	68190793	68191294
chr1	68204129	68204630
chr1	68269249	68269750
chr1	68297672	68298173
chr1	68302419	68302920
chr1	68312191	68312692
chr1	68360593	68361094
chr1	68360593	68361094
chr1	68360921	68361422
chr1	68360921	68361422
chr1	68686609	68687110
chr1	68686910	68687411
chr1	68691416	68691917
chr1	68844324	68844825
chr1	69520870	69521371
chr1	69569214	69569715
chr1	69940661	69941162
chr1	69959756	69960257
chr1	70159559	70160060
chr1	70750032	70750533
chr1	70797655	70798156
chr1	70971104	70971605
chr1	71697391	71697892
chr1	72466416	72466917
chr1	74625625	74626126
chr1	76571126	76571627
chr1	78537301	78537802
chr1	79052865	79053366
chr1	79555560	79556061
chr1	80210350	80210851
chr1	80521821	80522322
chr1	80883204	80883705
chr1	81584918	81585419
chr1	81651913	81652414
chr1	81975240	81975741
chr1	82180261	82180762
chr1	82340091	82340592
chr1	82464927	82465428
chr1	82691765	82692266
chr1	83369685	83370186
chr1	84477653	84478154
chr1	85215891	85216392
chr1	85308336	85308837
chr1	85690613	85691114
chr1	85755161	85755662
chr1	85762628	85763129
chr1	85763397	85763898
chr1	85763397	85763898
chr1	85786865	85787366
chr1	85804724	85805225
chr1	86021836	86022337
chr1	86037605	86038106
chr1	86889497	86889998
chr1	87012318	87012819
chr1	87102481	87102982
chr1	88183915	88184416
chr1	88501250	88501751
chr1	88526666	88527167
chr1	89918557	89919058
chr1	90081769	90082270
chr1	90320758	90321259
chr1	90627753	90628254
chr1	91045671	91046172
chr1	91995400	91995901
chr1	92211445	92211946
chr1	92283420	92283921
chr1	92329756	92330257
chr1	92338092	92338593
chr1	93313751	93314252
chr1	93373463	93373964
chr1	93374712	93375213
chr1	93687424	93687925
chr1	93688783	93689284
chr1	93787907	93788408
chr1	94058516	94059017
chr1	94063295	94063796
chr1	94080445	94080946
chr1	94158770	94159271
chr1	94164176	94164677
chr1	94426330	94426831
chr1	94547370	94547871
chr1	95015228	95015729
chr1	95018937	95019438
chr1	95086121	95086622
chr1	95100249	95100750
chr1	95112216	95112717
chr1	95302395	95302896
chr1	95341176	95341677
chr1	96049830	96050331
chr1	96188828	96189329
chr1	96208104	96208605
chr1	96756947	96757448
chr1	97547588	97548089
chr1	97678211	97678712
chr1	98065223	98065724
chr1	98789292	98789793
chr1	98791080	98791581
chr1	98791644	98792145
chr1	99205271	99205772
chr1	100045892	100046393
chr1	100087169	100087670
chr1	100125295	100125796
chr1	100205634	100206135
chr1	100229463	100229964
chr1	100279876	100280377
chr1	100517392	100517893
chr1	108078791	108079292
chr1	108090322	108090823
chr1	108115175	108115676
chr1	108115497	108115998
chr1	108220238	108220739
chr1	108336552	108337053
chr1	109370977	109371478
chr1	109388448	109388949
chr1	109570930	109571431
chr1	109592879	109593380
chr1	109638747	109639248
chr1	109704877	109705378
chr1	109740553	109741054
chr1	109752662	109753163
chr1	109783238	109783739
chr1	109805781	109806282
chr1	109839375	109839876
chr1	110435581	110436082
chr1	110453962	110454463
chr1	110471336	110471837
chr1	110471673	110472174
chr1	110802377	110802878
chr1	111019644	111020145
chr1	112135475	112135976
chr1	112603642	112604143
chr1	112862184	112862685
chr1	113229942	113230443
chr1	115161164	115161665
chr1	115345677	115346178
chr1	115843070	115843571
chr1	116197835	116198336
chr1	116257260	116257761
chr1	116809317	116809818
chr1	116822210	116822711
chr1	116832900	116833401
chr1	117044085	117044586
chr1	117262917	117263418
chr1	118752201	118752702
chr1	120216709	120217210
chr1	144010602	144011103
chr1	145543074	145543575
chr1	146638827	146639328
chr1	149967817	149968318
chr1	150156087	150156588
chr1	150506386	150506887
chr1	150583901	150584402
chr1	150596681	150597182
chr1	150633603	150634104
chr1	151031080	151031581
chr1	151167630	151168131
chr1	151686266	151686767
chr1	151859566	151860067
chr1	151996547	151997048
chr1	152023758	152024259
chr1	152140190	152140691
chr1	152155456	152155957
chr1	152158938	152159439
chr1	152163711	152164212
chr1	152339776	152340277
chr1	152365294	152365795
chr1	152460248	152460749
chr1	152475231	152475732
chr1	152690652	152691153
chr1	152712212	152712713
chr1	152758413	152758914
chr1	152783488	152783989
chr1	152830473	152830974
chr1	152852772	152853273
chr1	152859448	152859949
chr1	152926208	152926709
chr1	152944899	152945400
chr1	153147038	153147539
chr1	153260966	153261467
chr1	153265807	153266308
chr1	153465786	153466287
chr1	153498540	153499041
chr1	153539897	153540398
chr1	153587847	153588348
chr1	154169312	154169813
chr1	154293241	154293742
chr1	154363723	154364224
chr1	154390680	154391181
chr1	154785878	154786379
chr1	154883278	154883779
chr1	154909903	154910404
chr1	154943673	154944174
chr1	155097794	155098295
chr1	155100488	155100989
chr1	155532556	155533057
chr1	155833484	155833985
chr1	156073266	156073767
chr1	156073859	156074360
chr1	156093456	156093957
chr1	156572258	156572759
chr1	156661387	156661888
chr1	157114278	157114779
chr1	157980071	157980572
chr1	157986663	157987164
chr1	158115983	158116484
chr1	158116388	158116889
chr1	158885855	158886356
chr1	158979480	158979981
chr1	159025043	159025544
chr1	159060918	159061419
chr1	159231453	159231954
chr1	159756859	159757360
chr1	159880046	159880547
chr1	159895494	159895995
chr1	159973736	159974237
chr1	160031185	160031686
chr1	160086613	160087114
chr1	160384517	160385018
chr1	160737444	160737945
chr1	161044403	161044904
chr1	161044403	161044904
chr1	161044777	161045278
chr1	161044777	161045278
chr1	161053196	161053697
chr1	161450516	161451017
chr1	161451447	161451948
chr1	162335039	162335540
chr1	162883086	162883587
chr1	163252117	163252618
chr1	164640461	164640962
chr1	164680712	164681213
chr1	164756964	164757465
chr1	165872897	165873398
chr1	166758446	166758947
chr1	167121375	167121876
chr1	167511796	167512297
chr1	167513743	167514244
chr1	167632236	167632737
chr1	167638385	167638886
chr1	167640838	167641339
chr1	167652357	167652858
chr1	167732656	167733157
chr1	167759399	167759900
chr1	167768915	167769416
chr1	168082112	168082613
chr1	168445784	168446285
chr1	168960905	168961406
chr1	169085040	169085541
chr1	169535094	169535595
chr1	169553662	169554163
chr1	170552281	170552782
chr1	171236474	171236975
chr1	171519167	171519668
chr1	171871619	171872120
chr1	172107744	172108245
chr1	172291803	172292304
chr1	172292285	172292786
chr1	172445302	172445803
chr1	172569007	172569508
chr1	172688161	172688662
chr1	172886959	172887460
chr1	172920849	172921350
chr1	173021840	173022341
chr1	173159691	173160192
chr1	173570811	173571312
chr1	173630372	173630873
chr1	173915607	173916108
chr1	174291284	174291785
chr1	174788051	174788552
chr1	175191288	175191789
chr1	176015928	176016429
chr1	177274128	177274629
chr1	177633619	177634120
chr1	177769623	177770124
chr1	177914961	177915462
chr1	178247206	178247707
chr1	178368363	178368864
chr1	178531507	178532008
chr1	179008108	179008609
chr1	180485165	180485666
chr1	180491058	180491559
chr1	180544439	180544940
chr1	180554569	180555070
chr1	180922430	180922931
chr1	180990987	180991488
chr1	181002180	181002681
chr1	181010564	181011065
chr1	181013674	181014175
chr1	181068651	181069152
chr1	181104033	181104534
chr1	181108750	181109251
chr1	181128507	181129008
chr1	181510583	181511084
chr1	181737242	181737743
chr1	182057121	182057622
chr1	182070386	182070887
chr1	182144410	182144911
chr1	182612790	182613291
chr1	182771183	182771684
chr1	182931700	182932201
chr1	183134048	183134549
chr1	183167492	183167993
chr1	183181957	183182458
chr1	183203698	183204199
chr1	183237026	183237527
chr1	183248853	183249354
chr1	183252374	183252875
chr1	183261213	183261714
chr1	183923567	183924068
chr1	184360023	184360524
chr1	184393259	184393760
chr1	184514624	184515125
chr1	184581228	184581729
chr1	184922517	184923018
chr1	184923418	184923919
chr1	185065562	185066063
chr1	185370078	185370579
chr1	185381790	185382291
chr1	185534436	185534937
chr1	185688133	185688634
chr1	185930718	185931219
chr1	186028458	186028959
chr1	186144652	186145153
chr1	186209495	186209996
chr1	186528565	186529066
chr1	186627543	186628044
chr1	186681263	186681764
chr1	186896912	186897413
chr1	188086503	188087004
chr1	188319187	188319688
chr1	189592416	189592917
chr1	190833155	190833656
chr1	190833387	190833888
chr1	192803247	192803748
chr1	193406817	193407318
chr1	193407172	193407673
chr1	195927231	195927732
chr1	196150237	196150738
chr1	197744896	197745397
chr1	197945340	197945841
chr1	198138790	198139291
chr1	198202248	198202749
chr1	198306934	198307435
chr1	199918037	199918538
chr1	200064155	200064656
chr1	200123264	200123765
chr1	200150945	200151446
chr1	200196014	200196515
chr1	200594081	200594582
chr1	200594384	200594885
chr1	200628408	200628909
chr1	200643553	200644054
chr1	200863748	200864249
chr1	200882082	200882583
chr1	200886561	200887062
chr1	201258670	201259171
chr1	201265011	201265512
chr1	201269023	201269524
chr1	201280703	201281204
chr1	201314011	201314512
chr1	201430930	201431431
chr1	201438041	201438542
chr1	201445112	201445613
chr1	201445632	201446133
chr1	201743784	201744285
chr1	201754471	201754972
chr1	201956011	201956512
chr1	201977240	201977741
chr1	201988156	201988657
chr1	202025622	202026123
chr1	202025877	202026378
chr1	202191412	202191913
chr1	202198350	202198851
chr1	202206197	202206698
chr1	202559979	202560480
chr1	202562940	202563441
chr1	202805537	202806038
chr1	202813334	202813835
chr1	203063079	203063580
chr1	203243568	203244069
chr1	203272530	203273031
chr1	203275573	203276074
chr1	203571050	203571551
chr1	203594663	203595164
chr1	203619507	203620008
chr1	203720176	203720677
chr1	203738705	203739206
chr1	203829456	203829957
chr1	204123600	204124101
chr1	204270352	204270853
chr1	204412343	204412844
chr1	204493937	204494438
chr1	204568706	204569207
chr1	204884885	204885386
chr1	205227940	205228441
chr1	205245485	205245986
chr1	205253654	205254155
chr1	205561084	205561585
chr1	205604832	205605333
chr1	206655890	206656391
chr1	206687159	206687660
chr1	206698109	206698610
chr1	206760029	206760530
chr1	206763313	206763814
chr1	207047066	207047567
chr1	207058931	207059432
chr1	207113156	207113657
chr1	207176041	207176542
chr1	207193616	207194117
chr1	207204908	207205409
chr1	207247184	207247685
chr1	207413949	207414450
chr1	207981596	207982097
chr1	207997046	207997547
chr1	208259371	208259872
chr1	208381442	208381943
chr1	208381442	208381943
chr1	208382649	208383150
chr1	208404518	208405019
chr1	208980497	208980998
chr1	208980497	208980998
chr1	208980974	208981475
chr1	208980974	208981475
chr1	209224817	209225318
chr1	209402772	209403273
chr1	209403524	209404025
chr1	209408468	209408969
chr1	209528766	209529267
chr1	209538031	209538532
chr1	209543898	209544399
chr1	209557143	209557644
chr1	209562562	209563063
chr1	209584921	209585422
chr1	209589288	209589789
chr1	209604226	209604727
chr1	209658480	209658981
chr1	209817001	209817502
chr1	209826250	209826751
chr1	209831300	209831801
chr1	209896538	209897039
chr1	209989251	209989752
chr1	209989719	209990220
chr1	209989719	209990220
chr1	210405235	210405736
chr1	210430849	210431350
chr1	210494807	210495308
chr1	211432057	211432558
chr1	211874986	211875487
chr1	212101388	212101889
chr1	212361766	212362267
chr1	212434288	212434789
chr1	212676051	212676552
chr1	212769663	212770164
chr1	212778856	212779357
chr1	213046176	213046677
chr1	213860190	213860691
chr1	214593644	214594145
chr1	214612723	214613224
chr1	214650458	214650959
chr1	214650771	214651272
chr1	214747253	214747754
chr1	215174948	215175449
chr1	215306693	215307194
chr1	217076022	217076523
chr1	218774299	218774800
chr1	218797472	218797973
chr1	218853337	218853838
chr1	218879515	218880016
chr1	219514261	219514762
chr1	219634388	219634889
chr1	219759107	219759608
chr1	220509661	220510162
chr1	220688815	220689316
chr1	220688815	220689316
chr1	220689285	220689786
chr1	220689285	220689786
chr1	220689977	220690478
chr1	221635604	221636105
chr1	221808645	221809146
chr1	221840835	221841336
chr1	221970383	221970884
chr1	222005889	222006390
chr1	222013175	222013676
chr1	222042265	222042766
chr1	222161041	222161542
chr1	222340391	222340892
chr1	223529052	223529553
chr1	223594971	223595472
chr1	223602680	223603181
chr1	223895720	223896221
chr1	224320535	224321036
chr1	224691288	224691789
chr1	225534845	225535346
chr1	225537487	225537988
chr1	225566609	225567110
chr1	225632586	225633087
chr1	225636990	225637491
chr1	225883234	225883735
chr1	225888009	225888510
chr1	225896757	225897258
chr1	225898461	225898962
chr1	225955723	225956224
chr1	225956768	225957269
chr1	226110025	226110526
chr1	226123691	226124192
chr1	226667188	226667689
chr1	226845774	226846275
chr1	227584200	227584701
chr1	228073405	228073906
chr1	228103386	228103887
chr1	228133961	228134462
chr1	228200942	228201443
chr1	228202241	228202742
chr1	228307852	228308353
chr1	228542042	228542543
chr1	228674253	228674754
chr1	228966867	228967368
chr1	228973847	228974348
chr1	229282893	229283394
chr1	229361116	229361617
chr1	229367021	229367522
chr1	230220416	230220917
chr1	230222726	230223227
chr1	230257964	230258465
chr1	231152767	231153268
chr1	231307312	231307813
chr1	232065068	232065569
chr1	232070441	232070942
chr1	232428642	232429143
chr1	232551859	232552360
chr1	232814215	232814716
chr1	232842825	232843326
chr1	233008974	233009475
chr1	233009634	233010135
chr1	233088561	233089062
chr1	233161270	233161771
chr1	233248436	233248937
chr1	234136298	234136799
chr1	234270548	234271049
chr1	234324040	234324541
chr1	234447122	234447623
chr1	234456264	234456765
chr1	234674763	234675264
chr1	234700316	234700817
chr1	234724991	234725492
chr1	234792755	234793256
chr1	234835805	234836306
chr1	234859867	234860368
chr1	234861979	234862480
chr1	234994482	234994983
chr1	235022278	235022779
chr1	235132960	235133461
chr1	235776814	235777315
chr1	235805502	235806003
chr1	235805502	235806003
chr1	235805911	235806412
chr1	235805911	235806412
chr1	235838290	235838791
chr1	236080845	236081346
chr1	236083047	236083548
chr1	236096296	236096797
chr1	236124045	236124546
chr1	236247046	236247547
chr1	236467033	236467534
chr1	236558068	236558569
chr1	236618453	236618954
chr1	236629277	236629778
chr1	236680413	236680914
chr1	238225425	238225926
chr1	238419075	238419576
chr1	240921549	240922050
chr1	241745952	241746453
chr1	241751094	241751595
chr1	241771858	241772359
chr1	241852001	241852502
chr1	242361662	242362163
chr1	242363316	242363817
chr1	243893723	243894224
chr1	244402634	244403135
chr1	244534997	244535498
chr1	244898667	244899168
chr1	245249626	245250127
chr1	245254386	245254887
chr1	246324817	246325318
chr1	246329673	246330174
chr1	246330093	246330594
chr1	248126048	248126549
chr10	1100645	1101146
chr10	1408790	1409291
chr10	1643019	1643520
chr10	2159848	2160349
chr10	2304471	2304972
chr10	3149776	3150277
chr10	3524408	3524909
chr10	3818844	3819345
chr10	4111463	4111964
chr10	4271976	4272477
chr10	4292310	4292811
chr10	4575722	4576223
chr10	4713510	4714011
chr10	4775221	4775722
chr10	5135407	5135908
chr10	5593668	5594169
chr10	5608506	5609007
chr10	5637971	5638472
chr10	5733625	5734126
chr10	6260996	6261497
chr10	6533731	6534232
chr10	6570556	6571057
chr10	6654138	6654639
chr10	6681964	6682465
chr10	6781685	6782186
chr10	7979516	7980017
chr10	8636217	8636718
chr10	8744808	8745309
chr10	8806038	8806539
chr10	8810262	8810763
chr10	8859237	8859738
chr10	9017459	9017960
chr10	10362959	10363460
chr10	10907763	10908264
chr10	11799942	11800443
chr10	11880229	11880730
chr10	11926639	11927140
chr10	12628649	12629150
chr10	12891577	12892078
chr10	12969822	12970323
chr10	12976676	12977177
chr10	13129810	13130311
chr10	13732344	13732845
chr10	13812023	13812524
chr10	14690872	14691373
chr10	15165834	15166335
chr10	15214407	15214908
chr10	16688486	16688987
chr10	17154506	17155007
chr10	17307433	17307934
chr10	17318687	17319188
chr10	17655153	17655654
chr10	20122043	20122544
chr10	21127984	21128485
chr10	21553270	21553771
chr10	21604201	21604702
chr10	21625383	21625884
chr10	21657807	21658308
chr10	22100161	22100662
chr10	23662037	23662538
chr10	23673095	23673596
chr10	23819865	23820366
chr10	24544886	24545387
chr10	24613473	24613974
chr10	24672072	24672573
chr10	24672072	24672573
chr10	24672528	24673029
chr10	24672528	24673029
chr10	24754411	24754912
chr10	24772447	24772948
chr10	24777472	24777973
chr10	25015516	25016017
chr10	25198560	25199061
chr10	25270188	25270689
chr10	25357077	25357578
chr10	26910825	26911326
chr10	27147460	27147961
chr10	27608904	27609405
chr10	27763622	27764123
chr10	27767941	27768442
chr10	27772144	27772645
chr10	27789796	27790297
chr10	29922999	29923500
chr10	29924067	29924568
chr10	29935215	29935716
chr10	30128712	30129213
chr10	30209962	30210463
chr10	30240564	30241065
chr10	31268834	31269335
chr10	32359461	32359962
chr10	33299102	33299603
chr10	33415140	33415641
chr10	34178243	34178744
chr10	34186093	34186594
chr10	34216202	34216703
chr10	34399152	34399653
chr10	34515431	34515932
chr10	34721484	34721985
chr10	34780959	34781460
chr10	35008201	35008702
chr10	35008201	35008702
chr10	35008638	35009139
chr10	35008638	35009139
chr10	35194827	35195328
chr10	35277602	35278103
chr10	38265507	38266008
chr10	38296861	38297362
chr10	43521503	43522004
chr10	43947520	43948021
chr10	44069829	44070330
chr10	45211811	45212312
chr10	46009701	46010202
chr10	46049027	46049528
chr10	48332663	48333164
chr10	48342668	48343169
chr10	49459545	49460046
chr10	49622663	49623164
chr10	49625348	49625849
chr10	49674567	49675068
chr10	49679333	49679834
chr10	52085130	52085631
chr10	52381604	52382105
chr10	54203159	54203660
chr10	54624199	54624700
chr10	56868350	56868851
chr10	60038541	60039042
chr10	60841998	60842499
chr10	60933125	60933626
chr10	61882933	61883434
chr10	62302450	62302951
chr10	62520409	62520910
chr10	63514267	63514768
chr10	63662552	63663053
chr10	63779131	63779632
chr10	63785188	63785689
chr10	63843553	63844054
chr10	64096111	64096612
chr10	65189945	65190446
chr10	65345797	65346298
chr10	65388589	65389090
chr10	68264767	68265268
chr10	68265055	68265556
chr10	70805269	70805770
chr10	71145072	71145573
chr10	71906467	71906968
chr10	72835087	72835588
chr10	72859489	72859990
chr10	73006503	73007004
chr10	73060660	73061161
chr10	73272497	73272998
chr10	73465305	73465806
chr10	73499697	73500198
chr10	73507161	73507662
chr10	73627841	73628342
chr10	73632236	73632737
chr10	73648684	73649185
chr10	73730971	73731472
chr10	73922827	73923328
chr10	74074670	74075171
chr10	74081729	74082230
chr10	74082211	74082712
chr10	74091587	74092088
chr10	74648984	74649485
chr10	74740060	74740561
chr10	75647425	75647926
chr10	75648613	75649114
chr10	75949745	75950246
chr10	75949745	75950246
chr10	76248626	76249127
chr10	76964789	76965290
chr10	76967981	76968482
chr10	77012993	77013494
chr10	77054585	77055086
chr10	78343286	78343787
chr10	78766741	78767242
chr10	79655760	79656261
chr10	79658240	79658741
chr10	79941434	79941935
chr10	80679762	80680263
chr10	80710645	80711146
chr10	80778311	80778812
chr10	80847991	80848492
chr10	80912261	80912762
chr10	80941351	80941852
chr10	80949102	80949603
chr10	81045989	81046490
chr10	81914636	81915137
chr10	81924868	81925369
chr10	82173306	82173807
chr10	82189352	82189853
chr10	82230730	82231231
chr10	82254833	82255334
chr10	82378753	82379254
chr10	85743324	85743825
chr10	85938907	85939408
chr10	86370871	86371372
chr10	87307800	87308301
chr10	88718565	88719066
chr10	88728061	88728562
chr10	89402631	89403132
chr10	89802408	89802909
chr10	89848109	89848610
chr10	89891347	89891848
chr10	90564005	90564506
chr10	90611423	90611924
chr10	90877806	90878307
chr10	91001425	91001926
chr10	91292241	91292742
chr10	91404784	91405285
chr10	91811217	91811718
chr10	92180364	92180865
chr10	92244078	92244579
chr10	92594040	92594541
chr10	92610031	92610532
chr10	93110910	93111411
chr10	93412067	93412568
chr10	93412907	93413408
chr10	93450985	93451486
chr10	93960279	93960780
chr10	94089749	94090250
chr10	94897830	94898331
chr10	95205278	95205779
chr10	95225803	95226304
chr10	97007539	97008040
chr10	97035311	97035812
chr10	97035311	97035812
chr10	97035723	97036224
chr10	97035723	97036224
chr10	97036273	97036774
chr10	97054728	97055229
chr10	97110487	97110988
chr10	97118074	97118575
chr10	98261820	98262321
chr10	98265109	98265610
chr10	98602784	98603285
chr10	98829574	98830075
chr10	99172579	99173080
chr10	99411188	99411689
chr10	99411424	99411925
chr10	99449871	99450372
chr10	100053380	100053881
chr10	100056283	100056784
chr10	100101117	100101618
chr10	101381178	101381679
chr10	101414413	101414914
chr10	101416317	101416818
chr10	101445214	101445715
chr10	101744026	101744527
chr10	101803057	101803558
chr10	101803536	101804037
chr10	102162708	102163209
chr10	102490685	102491186
chr10	102645722	102646223
chr10	102981254	102981755
chr10	103872817	103873318
chr10	104402297	104402798
chr10	104529502	104530003
chr10	104874608	104875109
chr10	105517347	105517848
chr10	105531359	105531860
chr10	105540340	105540841
chr10	105631888	105632389
chr10	105639037	105639538
chr10	105641332	105641833
chr10	105642304	105642805
chr10	105659979	105660480
chr10	105701560	105702061
chr10	105718635	105719136
chr10	106089108	106089609
chr10	106568949	106569450
chr10	107220408	107220909
chr10	111654221	111654722
chr10	112158228	112158729
chr10	112621839	112622340
chr10	114748543	114749044
chr10	114807380	114807881
chr10	114807804	114808305
chr10	114827255	114827756
chr10	114859006	114859507
chr10	115311684	115312185
chr10	115680667	115681168
chr10	115716580	115717081
chr10	115820907	115821408
chr10	115828027	115828528
chr10	116004781	116005282
chr10	116005092	116005593
chr10	116080298	116080799
chr10	116259497	116259998
chr10	116304008	116304509
chr10	116408151	116408652
chr10	119813813	119814314
chr10	120261100	120261601
chr10	120630860	120631361
chr10	121004737	121005238
chr10	121084559	121085060
chr10	121309100	121309601
chr10	121413978	121414479
chr10	121439913	121440414
chr10	121439913	121440414
chr10	121440150	121440651
chr10	121441835	121442336
chr10	122705235	122705736
chr10	122725178	122725679
chr10	122919241	122919742
chr10	122938506	122939007
chr10	123047560	123048061
chr10	123313192	123313693
chr10	123356528	123357029
chr10	123387334	123387835
chr10	123844761	123845262
chr10	124053345	124053846
chr10	124067072	124067573
chr10	124235708	124236209
chr10	125770868	125771369
chr10	125780895	125781396
chr10	125802617	125803118
chr10	125828814	125829315
chr10	126027658	126028159
chr10	126029449	126029950
chr10	126213339	126213840
chr10	126307680	126308181
chr10	126337260	126337761
chr10	126343158	126343659
chr10	126776068	126776569
chr10	127375999	127376500
chr10	128598754	128599255
chr10	129536713	129537214
chr10	129861995	129862496
chr10	131818788	131819289
chr10	131936742	131937243
chr10	134237710	134238211
chr10	135088259	135088760
chr11	283736	284237
chr11	350642	351143
chr11	515094	515595
chr11	534491	534992
chr11	692693	693194
chr11	706792	707293
chr11	804173	804674
chr11	1050928	1051429
chr11	1108679	1109180
chr11	1328347	1328848
chr11	1671522	1672023
chr11	1851823	1852324
chr11	1855334	1855835
chr11	1894724	1895225
chr11	1965013	1965514
chr11	2200347	2200848
chr11	2223692	2224193
chr11	2277771	2278272
chr11	2595888	2596389
chr11	2824600	2825101
chr11	3013946	3014447
chr11	3021677	3022178
chr11	3024226	3024727
chr11	4066065	4066566
chr11	4485419	4485920
chr11	5306968	5307469
chr11	7617972	7618473
chr11	7621430	7621931
chr11	7879530	7880031
chr11	8159987	8160488
chr11	8250685	8251186
chr11	8251718	8252219
chr11	9160331	9160832
chr11	9631466	9631967
chr11	9715292	9715793
chr11	9775628	9776129
chr11	9780244	9780745
chr11	9781181	9781682
chr11	9842473	9842974
chr11	9862751	9863252
chr11	10003932	10004433
chr11	10319250	10319751
chr11	10380186	10380687
chr11	10436763	10437264
chr11	10510557	10511058
chr11	10539731	10540232
chr11	10920955	10921456
chr11	11472488	11472989
chr11	11541695	11542196
chr11	11753119	11753620
chr11	12085553	12086054
chr11	12087422	12087923
chr11	12111736	12112237
chr11	12211071	12211572
chr11	12792366	12792867
chr11	12860309	12860810
chr11	13030006	13030507
chr11	13094869	13095370
chr11	13095115	13095616
chr11	13112934	13113435
chr11	13162395	13162896
chr11	13181716	13182217
chr11	13182174	13182675
chr11	13189771	13190272
chr11	13483693	13484194
chr11	13685850	13686351
chr11	14358685	14359186
chr11	14382419	14382920
chr11	15991387	15991888
chr11	16119046	16119547
chr11	16299821	16300322
chr11	16809629	16810130
chr11	16897514	16898015
chr11	16897865	16898366
chr11	17808643	17809144
chr11	17819836	17820337
chr11	19049766	19050267
chr11	19238204	19238705
chr11	19266113	19266614
chr11	19653896	19654397
chr11	20071993	20072494
chr11	20075079	20075580
chr11	20505431	20505932
chr11	20588071	20588572
chr11	21594547	21595048
chr11	23021887	23022388
chr11	23258648	23259149
chr11	24421718	24422219
chr11	25089885	25090386
chr11	27195618	27196119
chr11	27231020	27231521
chr11	27249713	27250214
chr11	27384617	27385118
chr11	27434693	27435194
chr11	27695485	27695986
chr11	28161348	28161849
chr11	28162158	28162659
chr11	28870568	28871069
chr11	29548690	29549191
chr11	30398892	30399393
chr11	30609477	30609978
chr11	31240325	31240826
chr11	32324291	32324792
chr11	32852280	32852781
chr11	33082933	33083434
chr11	33677780	33678281
chr11	33689529	33690030
chr11	34051899	34052400
chr11	34197786	34198287
chr11	34417637	34418138
chr11	34661810	34662311
chr11	34675360	34675861
chr11	34706511	34707012
chr11	34706889	34707390
chr11	34831132	34831633
chr11	35078058	35078559
chr11	35133762	35134263
chr11	35137118	35137619
chr11	35165180	35165681
chr11	35180219	35180720
chr11	35297834	35298335
chr11	35579821	35580322
chr11	35581633	35582134
chr11	35589235	35589736
chr11	35605871	35606372
chr11	35643627	35644128
chr11	35915402	35915903
chr11	36041367	36041868
chr11	36720736	36721237
chr11	42181413	42181914
chr11	43839684	43840185
chr11	44586070	44586571
chr11	45201934	45202435
chr11	45951813	45952314
chr11	45952616	45953117
chr11	46087865	46088366
chr11	46366531	46367032
chr11	46708532	46709033
chr11	46708980	46709481
chr11	46938187	46938688
chr11	47236275	47236776
chr11	56700278	56700779
chr11	57060475	57060976
chr11	57447008	57447509
chr11	57555820	57556321
chr11	57669032	57669533
chr11	58345313	58345814
chr11	58425922	58426423
chr11	58426228	58426729
chr11	59033822	59034323
chr11	59473979	59474480
chr11	59474239	59474740
chr11	59662037	59662538
chr11	60746300	60746801
chr11	61065008	61065509
chr11	61137102	61137603
chr11	61357415	61357916
chr11	61587547	61588048
chr11	61657238	61657739
chr11	61657970	61658471
chr11	61766451	61766952
chr11	61798374	61798875
chr11	61990274	61990775
chr11	62178329	62178830
chr11	62178725	62179226
chr11	62267720	62268221
chr11	62310642	62311143
chr11	62315330	62315831
chr11	62328074	62328575
chr11	62367286	62367787
chr11	63729103	63729604
chr11	63753524	63754025
chr11	63832203	63832704
chr11	63832537	63833038
chr11	63888416	63888917
chr11	63994939	63995440
chr11	64035846	64036347
chr11	64044023	64044524
chr11	64078541	64079042
chr11	64084932	64085433
chr11	64092065	64092566
chr11	64109744	64110245
chr11	64114594	64115095
chr11	64204786	64205287
chr11	64309549	64310050
chr11	64310140	64310641
chr11	64442814	64443315
chr11	64451711	64452212
chr11	64610397	64610898
chr11	64738104	64738605
chr11	64808384	64808885
chr11	64889493	64889994
chr11	64950519	64951020
chr11	64993087	64993588
chr11	65149533	65150034
chr11	65153720	65154221
chr11	65186101	65186602
chr11	65188541	65189042
chr11	65253287	65253788
chr11	65261218	65261719
chr11	65360231	65360732
chr11	65418173	65418674
chr11	65551369	65551870
chr11	65560553	65561054
chr11	65666475	65666976
chr11	65894330	65894831
chr11	65910169	65910670
chr11	66106453	66106954
chr11	66386662	66387163
chr11	66453796	66454297
chr11	66462232	66462733
chr11	66477139	66477640
chr11	66535407	66535908
chr11	66659643	66660144
chr11	66789923	66790424
chr11	66844831	66845332
chr11	66845109	66845610
chr11	66849844	66850345
chr11	67078010	67078511
chr11	67080172	67080673
chr11	67169921	67170422
chr11	67273076	67273577
chr11	67423726	67424227
chr11	67776176	67776677
chr11	67796926	67797427
chr11	68104695	68105196
chr11	68585552	68586053
chr11	68917036	68917537
chr11	68941712	68942213
chr11	69048459	69048960
chr11	69064715	69065216
chr11	69192319	69192820
chr11	69213806	69214307
chr11	69214115	69214616
chr11	69251742	69252243
chr11	69325207	69325708
chr11	69339362	69339863
chr11	69366659	69367160
chr11	69909621	69910122
chr11	69970371	69970872
chr11	69972593	69973094
chr11	70002359	70002860
chr11	70002719	70003220
chr11	70005775	70006276
chr11	70449702	70450203
chr11	70841076	70841577
chr11	70908168	70908669
chr11	70997556	70998057
chr11	70997859	70998360
chr11	71736021	71736522
chr11	71769738	71770239
chr11	71795099	71795600
chr11	71891881	71892382
chr11	72260438	72260939
chr11	72354162	72354663
chr11	72354162	72354663
chr11	72354651	72355152
chr11	72354651	72355152
chr11	72432745	72433246
chr11	72462191	72462692
chr11	72491529	72492030
chr11	72501778	72502279
chr11	72897331	72897832
chr11	72898815	72899316
chr11	72905653	72906154
chr11	72906226	72906727
chr11	72938896	72939397
chr11	72994327	72994828
chr11	73099571	73100072
chr11	73846211	73846712
chr11	74215932	74216433
chr11	74460453	74460954
chr11	74654005	74654506
chr11	75274776	75275277
chr11	76492989	76493490
chr11	76535856	76536357
chr11	76565749	76566250
chr11	76596375	76596876
chr11	77062219	77062720
chr11	77216968	77217469
chr11	77216968	77217469
chr11	77217333	77217834
chr11	77217333	77217834
chr11	77221174	77221675
chr11	77271719	77272220
chr11	77498700	77499201
chr11	79405393	79405894
chr11	79829058	79829559
chr11	80568318	80568819
chr11	80627186	80627687
chr11	82458377	82458878
chr11	82482836	82483337
chr11	82540074	82540575
chr11	82762966	82763467
chr11	85517886	85518387
chr11	85780043	85780544
chr11	85862983	85863484
chr11	85866305	85866806
chr11	86083580	86084081
chr11	86235088	86235589
chr11	86298116	86298617
chr11	86377195	86377696
chr11	86431050	86431551
chr11	86454540	86455041
chr11	86702365	86702866
chr11	87835693	87836194
chr11	87912303	87912804
chr11	87913047	87913548
chr11	89114083	89114584
chr11	92576572	92577073
chr11	92586073	92586574
chr11	92689014	92689515
chr11	92753398	92753899
chr11	93571537	93572038
chr11	94166154	94166655
chr11	94226441	94226942
chr11	94257475	94257976
chr11	94427215	94427716
chr11	94427526	94428027
chr11	94439300	94439801
chr11	94440025	94440526
chr11	94578791	94579292
chr11	94585292	94585793
chr11	94618276	94618777
chr11	94768438	94768939
chr11	94798454	94798955
chr11	95070507	95071008
chr11	95092890	95093391
chr11	95145208	95145709
chr11	95186946	95187447
chr11	95245308	95245809
chr11	95247504	95248005
chr11	95254360	95254861
chr11	95255957	95256458
chr11	95855680	95856181
chr11	95976379	95976880
chr11	97627930	97628431
chr11	100199613	100200114
chr11	100407693	100408194
chr11	100651178	100651679
chr11	100680825	100681326
chr11	100696260	100696761
chr11	101304951	101305452
chr11	101349174	101349675
chr11	101586106	101586607
chr11	101591994	101592495
chr11	101935002	101935503
chr11	102094446	102094947
chr11	102097479	102097980
chr11	102126931	102127432
chr11	102140488	102140989
chr11	102188002	102188503
chr11	102386754	102387255
chr11	102556049	102556550
chr11	102654310	102654811
chr11	102724676	102725177
chr11	102771016	102771517
chr11	102782493	102782994
chr11	102800753	102801254
chr11	102816919	102817420
chr11	102847326	102847827
chr11	103411743	103412244
chr11	103947115	103947616
chr11	104539822	104540323
chr11	104905698	104906199
chr11	106022728	106023229
chr11	106100660	106101161
chr11	106410680	106411181
chr11	106820534	106821035
chr11	107415941	107416442
chr11	107763869	107764370
chr11	108519029	108519530
chr11	108569621	108570122
chr11	109566891	109567392
chr11	109893228	109893729
chr11	109952277	109952778
chr11	110176175	110176676
chr11	110436323	110436824
chr11	111180858	111181359
chr11	111198669	111199170
chr11	111200392	111200893
chr11	111249091	111249592
chr11	111297277	111297778
chr11	111381019	111381520
chr11	111396115	111396616
chr11	111990957	111991458
chr11	112083117	112083618
chr11	112191367	112191868
chr11	112192066	112192567
chr11	112205030	112205531
chr11	112295705	112296206
chr11	112348604	112349105
chr11	112485280	112485781
chr11	113091493	113091994
chr11	113179266	113179767
chr11	113216736	113217237
chr11	113255263	113255764
chr11	113317597	113318098
chr11	113560597	113561098
chr11	113648921	113649422
chr11	113730273	113730774
chr11	114239959	114240460
chr11	115612136	115612637
chr11	117915871	117916372
chr11	117945469	117945970
chr11	117963601	117964102
chr11	118023845	118024346
chr11	118134847	118135348
chr11	118147073	118147574
chr11	118493955	118494456
chr11	118500374	118500875
chr11	118562590	118563091
chr11	118780947	118781448
chr11	118782506	118783007
chr11	118858833	118859334
chr11	119039836	119040337
chr11	119318405	119318906
chr11	119483476	119483977
chr11	119536699	119537200
chr11	119562679	119563180
chr11	119567013	119567514
chr11	119584800	119585301
chr11	119622930	119623431
chr11	119716381	119716882
chr11	119729107	119729608
chr11	119731197	119731698
chr11	119731812	119732313
chr11	119926227	119926728
chr11	119992844	119993345
chr11	119999458	119999959
chr11	120002856	120003357
chr11	120006488	120006989
chr11	120210207	120210708
chr11	120272202	120272703
chr11	120281564	120282065
chr11	120617795	120618296
chr11	121128568	121129069
chr11	121337317	121337818
chr11	121411214	121411715
chr11	121420853	121421354
chr11	121829656	121830157
chr11	121915952	121916453
chr11	121994422	121994923
chr11	122238612	122239113
chr11	122362143	122362644
chr11	122502532	122503033
chr11	122502852	122503353
chr11	122673803	122674304
chr11	122674378	122674879
chr11	122834647	122835148
chr11	122890775	122891276
chr11	122891177	122891678
chr11	123487154	123487655
chr11	124543359	124543860
chr11	124587214	124587715
chr11	124952827	124953328
chr11	125279961	125280462
chr11	125353318	125353819
chr11	125384152	125384653
chr11	125461308	125461809
chr11	125838133	125838634
chr11	125845992	125846493
chr11	125920391	125920892
chr11	126188467	126188968
chr11	128121037	128121538
chr11	128401823	128402324
chr11	128585475	128585976
chr11	128679002	128679503
chr11	128757741	128758242
chr11	128779279	128779780
chr11	129481988	129482489
chr11	129495793	129496294
chr11	129506693	129507194
chr11	129509179	129509680
chr11	129511768	129512269
chr11	129574439	129574940
chr11	129693115	129693616
chr11	129906821	129907322
chr11	129933442	129933943
chr11	129959233	129959734
chr11	130187979	130188480
chr11	130197539	130198040
chr11	130305566	130306067
chr11	130307820	130308321
chr11	130308658	130309159
chr11	130498933	130499434
chr11	130507123	130507624
chr11	130598564	130599065
chr11	130607987	130608488
chr11	130642040	130642541
chr11	130642434	130642935
chr11	130817273	130817774
chr11	130902816	130903317
chr11	133724912	133725413
chr12	1123228	1123729
chr12	1225147	1225648
chr12	1725308	1725809
chr12	2113579	2114080
chr12	3111704	3112205
chr12	3326454	3326955
chr12	3408990	3409491
chr12	3567042	3567543
chr12	3598113	3598614
chr12	3880872	3881373
chr12	4221905	4222406
chr12	4593590	4594091
chr12	4922823	4923324
chr12	5340020	5340521
chr12	5377356	5377857
chr12	5437808	5438309
chr12	5842121	5842622
chr12	6175740	6176241
chr12	6291213	6291714
chr12	6292097	6292598
chr12	6323830	6324331
chr12	6324987	6325488
chr12	6335081	6335582
chr12	6381465	6381966
chr12	6395934	6396435
chr12	6397233	6397734
chr12	6421971	6422472
chr12	6481870	6482371
chr12	6844883	6845384
chr12	7146673	7147174
chr12	7186525	7187026
chr12	7760716	7761217
chr12	8831103	8831604
chr12	9374052	9374553
chr12	9499859	9500360
chr12	9626786	9627287
chr12	9878011	9878512
chr12	10025197	10025698
chr12	10035449	10035950
chr12	10050094	10050595
chr12	10055380	10055881
chr12	10058975	10059476
chr12	10063625	10064126
chr12	10225829	10226330
chr12	10284693	10285194
chr12	10320201	10320702
chr12	10328789	10329290
chr12	10508586	10509087
chr12	10545215	10545716
chr12	10869237	10869738
chr12	10869938	10870439
chr12	11071364	11071865
chr12	11609849	11610350
chr12	11898912	11899413
chr12	11954475	11954976
chr12	12598749	12599250
chr12	12622346	12622847
chr12	12757679	12758180
chr12	13252671	13253172
chr12	13318382	13318883
chr12	13963964	13964465
chr12	14415658	14416159
chr12	14426456	14426957
chr12	14667887	14668388
chr12	15114438	15114939
chr12	15599677	15600178
chr12	15688206	15688707
chr12	15942724	15943225
chr12	16684543	16685044
chr12	18876698	18877199
chr12	19249766	19250267
chr12	19550402	19550903
chr12	19553768	19554269
chr12	19584713	19585214
chr12	19822685	19823186
chr12	21226409	21226910
chr12	22254584	22255085
chr12	22283537	22284038
chr12	22358981	22359482
chr12	24907743	24908244
chr12	25206981	25207482
chr12	25288573	25289074
chr12	25340678	25341179
chr12	25923985	25924486
chr12	26338827	26339328
chr12	26379432	26379933
chr12	26417164	26417665
chr12	26440442	26440943
chr12	26526982	26527483
chr12	26649017	26649518
chr12	26901577	26902078
chr12	26902664	26903165
chr12	27165742	27166243
chr12	27230413	27230914
chr12	27233011	27233512
chr12	27379087	27379588
chr12	27702053	27702554
chr12	27703485	27703986
chr12	27736264	27736765
chr12	27742263	27742764
chr12	27744512	27745013
chr12	28141472	28141973
chr12	28152440	28152941
chr12	28185969	28186470
chr12	29188003	29188504
chr12	30945357	30945858
chr12	31413503	31414004
chr12	31513518	31514019
chr12	31885802	31886303
chr12	32197040	32197541
chr12	33054291	33054792
chr12	33281460	33281961
chr12	34120628	34121129
chr12	38503724	38504225
chr12	39155411	39155912
chr12	39298569	39299070
chr12	39311839	39312340
chr12	39750792	39751293
chr12	39820604	39821105
chr12	40422050	40422551
chr12	40531057	40531558
chr12	40552601	40553102
chr12	41057526	41058027
chr12	41091598	41092099
chr12	41225647	41226148
chr12	41300860	41301361
chr12	41469871	41470372
chr12	43138704	43139205
chr12	43152483	43152984
chr12	43315968	43316469
chr12	46478468	46478969
chr12	46501328	46501829
chr12	46503664	46504165
chr12	46504645	46505146
chr12	46553927	46554428
chr12	46553927	46554428
chr12	46751202	46751703
chr12	46950512	46951013
chr12	46952534	46953035
chr12	46953145	46953646
chr12	47070544	47071045
chr12	47070544	47071045
chr12	47070891	47071392
chr12	47070891	47071392
chr12	47072146	47072647
chr12	47096622	47097123
chr12	47302977	47303478
chr12	47377278	47377779
chr12	47482182	47482683
chr12	47506396	47506897
chr12	47661246	47661747
chr12	47697839	47698340
[truncated: 7,725 more rows]

## Sheet: SCC152 p63 4A4
Chr	Start	End
chr1	906604	907105
chr1	961064	961565
chr1	1098369	1098870
chr1	1153161	1153662
chr1	1173486	1173987
chr1	1186199	1186700
chr1	1241853	1242354
chr1	1356614	1357115
chr1	1370665	1371166
chr1	1562535	1563036
chr1	1745464	1745965
chr1	1766859	1767360
chr1	1790577	1791078
chr1	1823970	1824471
chr1	1838853	1839354
chr1	1839851	1840352
chr1	2105745	2106246
chr1	2141378	2141879
chr1	2303215	2303716
chr1	2359842	2360343
chr1	2362575	2363076
chr1	2454721	2455222
chr1	2568071	2568572
chr1	3408309	3408810
chr1	3448024	3448525
chr1	3469964	3470465
chr1	3597539	3598040
chr1	3606917	3607418
chr1	3615206	3615707
chr1	3619047	3619548
chr1	3628410	3628911
chr1	3633420	3633921
chr1	3773803	3774304
chr1	5553365	5553866
chr1	5562259	5562760
chr1	5602448	5602949
chr1	5657266	5657767
chr1	5670991	5671492
chr1	5700226	5700727
chr1	5712218	5712719
chr1	5713842	5714343
chr1	5720176	5720677
chr1	5751088	5751589
chr1	5780464	5780965
chr1	5780982	5781483
chr1	5826634	5827135
chr1	5899240	5899741
chr1	5999164	5999665
chr1	6009121	6009622
chr1	6015373	6015874
chr1	6176210	6176711
chr1	6193673	6194174
chr1	6318609	6319110
chr1	6385434	6385935
chr1	6410405	6410906
chr1	6427602	6428103
chr1	6433893	6434394
chr1	6474491	6474992
chr1	6548645	6549146
chr1	6549037	6549538
chr1	6605300	6605801
chr1	6621929	6622430
chr1	6647498	6647999
chr1	6658247	6658748
chr1	6661404	6661905
chr1	6669385	6669886
chr1	6710240	6710741
chr1	7392220	7392721
chr1	7394732	7395233
chr1	8041367	8041868
chr1	8064713	8065214
chr1	8066295	8066796
chr1	8072386	8072887
chr1	8077437	8077938
chr1	8130309	8130810
chr1	8138074	8138575
chr1	8181137	8181638
chr1	8193989	8194490
chr1	8242356	8242857
chr1	8326358	8326859
chr1	8328777	8329278
chr1	8468311	8468812
chr1	8509043	8509544
chr1	8557578	8558079
chr1	8600295	8600796
chr1	8651574	8652075
chr1	8652045	8652546
chr1	8681891	8682392
chr1	8704835	8705336
chr1	8767018	8767519
chr1	8772427	8772928
chr1	8965596	8966097
chr1	8967755	8968256
chr1	8971523	8972024
chr1	8999555	9000056
chr1	9001867	9002368
chr1	9129030	9129531
chr1	9145629	9146130
chr1	9172841	9173342
chr1	9241961	9242462
chr1	9360167	9360668
chr1	9391550	9392051
chr1	9400229	9400730
chr1	9407076	9407577
chr1	9467574	9468075
chr1	9519046	9519547
chr1	9619214	9619715
chr1	9653803	9654304
chr1	9704714	9705215
chr1	9815357	9815858
chr1	9818682	9819183
chr1	9864787	9865288
chr1	9894475	9894976
chr1	9896158	9896659
chr1	9896505	9897006
chr1	9900152	9900653
chr1	9929742	9930243
chr1	9951066	9951567
chr1	10103577	10104078
chr1	10110504	10111005
chr1	10112349	10112850
chr1	10123843	10124344
chr1	10128786	10129287
chr1	10143130	10143631
chr1	10166753	10167254
chr1	10168360	10168861
chr1	10174732	10175233
chr1	10400305	10400806
chr1	10410848	10411349
chr1	10447730	10448231
chr1	10516655	10517156
chr1	10555977	10556478
chr1	10645933	10646434
chr1	10659515	10660016
chr1	10681882	10682383
chr1	10695277	10695778
chr1	10696001	10696502
chr1	10703605	10704106
chr1	10731142	10731643
chr1	10757658	10758159
chr1	10878588	10879089
chr1	10884904	10885405
chr1	10892637	10893138
chr1	10900012	10900513
chr1	10908641	10909142
chr1	10950737	10951238
chr1	10959751	10960252
chr1	10961342	10961843
chr1	10967176	10967677
chr1	10980261	10980762
chr1	11086058	11086559
chr1	11194240	11194741
chr1	12027690	12028191
chr1	12039729	12040230
chr1	12041690	12042191
chr1	12072138	12072639
chr1	12267092	12267593
chr1	12292270	12292771
chr1	12369676	12370177
chr1	12431621	12432122
chr1	12441151	12441652
chr1	12496919	12497420
chr1	12536898	12537399
chr1	12538240	12538741
chr1	12609847	12610348
chr1	12678222	12678723
chr1	13944164	13944665
chr1	14085528	14086029
chr1	14127691	14128192
chr1	14227242	14227743
chr1	14391442	14391943
chr1	14463300	14463801
chr1	14516928	14517429
chr1	14639646	14640147
chr1	14847212	14847713
chr1	14915156	14915657
chr1	14958553	14959054
chr1	14980997	14981498
chr1	15039490	15039991
chr1	15059515	15060016
chr1	15068670	15069171
chr1	15085482	15085983
chr1	15207499	15208000
chr1	15240104	15240605
chr1	15567478	15567979
chr1	15678795	15679296
chr1	15727120	15727621
chr1	15885980	15886481
chr1	15897472	15897973
chr1	15936678	15937179
chr1	15954372	15954873
chr1	16007357	16007858
chr1	16007840	16008341
chr1	16008155	16008656
chr1	16012347	16012848
chr1	16092264	16092765
chr1	16125491	16125992
chr1	16143066	16143567
chr1	16157285	16157786
chr1	16158156	16158657
chr1	16158614	16159115
chr1	16159693	16160194
chr1	16160623	16161124
chr1	16211534	16212035
chr1	16238378	16238879
chr1	16242921	16243422
chr1	16249773	16250274
chr1	16408494	16408995
chr1	16450201	16450702
chr1	16482351	16482852
chr1	16500032	16500533
chr1	16511065	16511566
chr1	16514657	16515158
chr1	16539000	16539501
chr1	16561680	16562181
chr1	16620609	16621110
chr1	16626918	16627419
chr1	16723012	16723513
chr1	16733410	16733911
chr1	16739562	16740063
chr1	16840308	16840809
chr1	16886116	16886617
chr1	16939898	16940399
chr1	17252003	17252504
chr1	17325116	17325617
chr1	17599080	17599581
chr1	17613739	17614240
chr1	17616203	17616704
chr1	17636146	17636647
chr1	17766255	17766756
chr1	17767641	17768142
chr1	17769886	17770387
chr1	17786820	17787321
chr1	17801594	17802095
chr1	17908463	17908964
chr1	17953155	17953656
chr1	18007735	18008236
chr1	18260244	18260745
chr1	18267759	18268260
chr1	18268264	18268765
chr1	18277201	18277702
chr1	18284291	18284792
chr1	18492013	18492514
chr1	18813331	18813832
chr1	18817780	18818281
chr1	18911283	18911784
chr1	18995210	18995711
chr1	19399737	19400238
chr1	19460633	19461134
chr1	19676504	19677005
chr1	19687588	19688089
chr1	19751014	19751515
chr1	19777227	19777728
chr1	19916730	19917231
chr1	19918294	19918795
chr1	19946255	19946756
chr1	19946581	19947082
chr1	19966387	19966888
chr1	20204206	20204707
chr1	20251977	20252478
chr1	20266735	20267236
chr1	20473539	20474040
chr1	20770625	20771126
chr1	21062101	21062602
chr1	21344336	21344837
chr1	21422032	21422533
chr1	21424641	21425142
chr1	21431225	21431726
chr1	21443869	21444370
chr1	21602743	21603244
chr1	21622326	21622827
chr1	21629410	21629911
chr1	21682488	21682989
chr1	21687950	21688451
chr1	21692631	21693132
chr1	21704881	21705382
chr1	21722896	21723397
chr1	21766253	21766754
chr1	21973938	21974439
chr1	22091413	22091914
chr1	22114436	22114937
chr1	22259871	22260372
chr1	22282254	22282755
chr1	22283318	22283819
chr1	22283923	22284424
chr1	22301169	22301670
chr1	22367968	22368469
chr1	22369600	22370101
chr1	22380849	22381350
chr1	22463846	22464347
chr1	22468600	22469101
chr1	22565781	22566282
chr1	22580262	22580763
chr1	23132959	23133460
chr1	23156636	23157137
chr1	23158462	23158963
chr1	23345623	23346124
chr1	23440784	23441285
chr1	23449243	23449744
chr1	23453187	23453688
chr1	23456347	23456848
chr1	23475602	23476103
chr1	23493848	23494349
chr1	23697076	23697577
chr1	23703804	23704305
chr1	23730190	23730691
chr1	23773056	23773557
chr1	23919021	23919522
chr1	23988323	23988824
chr1	24118186	24118687
chr1	24160506	24161007
chr1	24446830	24447331
chr1	24469571	24470072
chr1	24522327	24522828
chr1	24611602	24612103
chr1	24613098	24613599
chr1	24616150	24616651
chr1	24627445	24627946
chr1	24643456	24643957
chr1	24645969	24646470
chr1	24691483	24691984
chr1	24700118	24700619
chr1	24705967	24706468
chr1	24708508	24709009
chr1	24710664	24711165
chr1	24715866	24716367
chr1	24905575	24906076
chr1	24966331	24966832
chr1	25103287	25103788
chr1	25144939	25145440
chr1	25165906	25166407
chr1	25195507	25196008
chr1	25219882	25220383
chr1	25379694	25380195
chr1	25472346	25472847
chr1	25483606	25484107
chr1	25520919	25521420
chr1	25528603	25529104
chr1	25894715	25895216
chr1	25982958	25983459
chr1	26023776	26024277
chr1	26074943	26075444
chr1	26105855	26106356
chr1	26197883	26198384
chr1	26225653	26226154
chr1	26262256	26262757
chr1	26416542	26417043
chr1	26563750	26564251
chr1	26604750	26605251
chr1	26625171	26625672
chr1	26654401	26654902
chr1	26656243	26656744
chr1	26857599	26858100
chr1	26924593	26925094
chr1	26947209	26947710
chr1	26960224	26960725
chr1	27024823	27025324
chr1	27025179	27025680
chr1	27028368	27028869
chr1	27181381	27181882
chr1	27191328	27191829
chr1	27403517	27404018
chr1	27417318	27417819
chr1	27481411	27481912
chr1	27487970	27488471
chr1	27506020	27506521
chr1	27573818	27574319
chr1	27669329	27669830
chr1	27796430	27796931
chr1	27808713	27809214
chr1	27831517	27832018
chr1	27836020	27836521
chr1	27848866	27849367
chr1	27852453	27852954
chr1	27854500	27855001
chr1	27896895	27897396
chr1	27963132	27963633
chr1	28040264	28040765
chr1	28045728	28046229
chr1	28114438	28114939
chr1	28354053	28354554
chr1	28372139	28372640
chr1	28384616	28385117
chr1	28396298	28396799
chr1	28523310	28523811
chr1	28568307	28568808
chr1	28586565	28587066
chr1	28692394	28692895
chr1	28699715	28700216
chr1	28730188	28730689
chr1	28776456	28776957
chr1	28777016	28777517
chr1	28780187	28780688
chr1	28868105	28868606
chr1	28901126	28901627
chr1	28908096	28908597
chr1	28974996	28975497
chr1	28987311	28987812
chr1	29066068	29066569
chr1	29186834	29187335
chr1	29211375	29211876
chr1	29328364	29328865
chr1	29356021	29356522
chr1	29389426	29389927
chr1	29517710	29518211
chr1	29565670	29566171
chr1	29618844	29619345
chr1	29658357	29658858
chr1	29753146	29753647
chr1	30182584	30183085
chr1	30346501	30347002
chr1	30348198	30348699
chr1	30402252	30402753
chr1	30679058	30679559
chr1	30727963	30728464
chr1	31033836	31034337
chr1	31035541	31036042
chr1	31091219	31091720
chr1	31106083	31106584
chr1	31148338	31148839
chr1	31220904	31221405
chr1	31407378	31407879
chr1	31418223	31418724
chr1	31485834	31486335
chr1	31492750	31493251
chr1	31520406	31520907
chr1	31586822	31587323
chr1	31643549	31644050
chr1	31693861	31694362
chr1	31746430	31746931
chr1	31814460	31814961
chr1	31846680	31847181
chr1	31872988	31873489
chr1	31877883	31878384
chr1	31878521	31879022
chr1	31913265	31913766
chr1	31980954	31981455
chr1	32032349	32032850
chr1	32038211	32038712
chr1	32040496	32040997
chr1	32041065	32041566
chr1	32103377	32103878
chr1	32104071	32104572
chr1	32135457	32135958
chr1	32144053	32144554
chr1	32362996	32363497
chr1	32629548	32630049
chr1	32645489	32645990
chr1	32698505	32699006
chr1	32706823	32707324
chr1	32920396	32920897
chr1	32959729	32960230
chr1	32966264	32966765
chr1	33190037	33190538
chr1	33196773	33197274
chr1	33224960	33225461
chr1	33225651	33226152
chr1	33228862	33229363
chr1	33282731	33283232
chr1	33399602	33400103
chr1	33405201	33405702
chr1	33429249	33429750
chr1	33454743	33455244
chr1	33456847	33457348
chr1	33470158	33470659
chr1	33540165	33540666
chr1	33588845	33589346
chr1	33617295	33617796
chr1	33686593	33687094
chr1	33829615	33830116
chr1	33845841	33846342
chr1	33905439	33905940
chr1	33924098	33924599
chr1	33984743	33985244
chr1	35155983	35156484
chr1	35169666	35170167
chr1	35220832	35221333
chr1	35518352	35518853
chr1	35551042	35551543
chr1	35611574	35612075
chr1	35920304	35920805
chr1	35971379	35971880
chr1	35973184	35973685
chr1	36021593	36022094
chr1	36109867	36110368
chr1	36239303	36239804
chr1	36300911	36301412
chr1	36316584	36317085
chr1	36741511	36742012
chr1	36762515	36763016
chr1	36914272	36914773
chr1	36978363	36978864
chr1	37217097	37217598
chr1	37536229	37536730
chr1	37559860	37560361
chr1	37577903	37578404
chr1	38054395	38054896
chr1	38430875	38431376
chr1	38492710	38493211
chr1	38583262	38583763
chr1	38774388	38774889
chr1	38978419	38978920
chr1	39416164	39416665
chr1	39416670	39417171
chr1	39470161	39470662
chr1	39576353	39576854
chr1	39578761	39579262
chr1	39582439	39582940
chr1	39592491	39592992
chr1	39598676	39599177
chr1	39624673	39625174
chr1	39636589	39637090
chr1	39649331	39649832
chr1	39658012	39658513
chr1	39668234	39668735
chr1	39697654	39698155
chr1	39741490	39741991
chr1	39743065	39743566
chr1	39754405	39754906
chr1	39760852	39761353
chr1	39870686	39871187
chr1	39887683	39888184
chr1	39933661	39934162
chr1	40071480	40071981
chr1	40196061	40196562
chr1	40266142	40266643
chr1	40268422	40268923
chr1	40291377	40291878
chr1	40294348	40294849
chr1	40316216	40316717
chr1	40317814	40318315
chr1	40343713	40344214
chr1	40360690	40361191
chr1	40409774	40410275
chr1	40426289	40426790
chr1	40442482	40442983
chr1	40447750	40448251
chr1	40454253	40454754
chr1	40558633	40559134
chr1	40780852	40781353
chr1	40847236	40847737
chr1	41057586	41058087
chr1	41116992	41117493
chr1	41177042	41177543
chr1	41201858	41202359
chr1	41323706	41324207
chr1	41336410	41336911
chr1	41352229	41352730
chr1	41355414	41355915
chr1	41365016	41365517
chr1	41372429	41372930
chr1	41408405	41408906
chr1	41472517	41473018
chr1	41511345	41511846
chr1	41779646	41780147
chr1	41788841	41789342
chr1	41824103	41824604
chr1	41858725	41859226
chr1	41961841	41962342
chr1	42268912	42269413
chr1	42269394	42269895
chr1	42275330	42275831
chr1	42418915	42419416
chr1	42468833	42469334
chr1	42475704	42476205
chr1	42495262	42495763
chr1	42520599	42521100
chr1	42631382	42631883
chr1	42639544	42640045
chr1	42657710	42658211
chr1	42805677	42806178
chr1	42905480	42905981
chr1	42956807	42957308
chr1	42998729	42999230
chr1	43009372	43009873
chr1	43021414	43021915
chr1	43030431	43030932
chr1	43100398	43100899
chr1	43123392	43123893
chr1	43158110	43158611
chr1	43158908	43159409
chr1	43187514	43188015
chr1	43402823	43403324
chr1	43406619	43407120
chr1	43407343	43407844
chr1	43408785	43409286
chr1	43487098	43487599
chr1	43487541	43488042
chr1	43586895	43587396
chr1	43618451	43618952
chr1	43761177	43761678
chr1	43861005	43861506
chr1	43971299	43971800
chr1	43978063	43978564
chr1	44002118	44002619
chr1	44002531	44003032
chr1	44015838	44016339
chr1	44029882	44030383
chr1	44047807	44048308
chr1	44051763	44052264
chr1	44108814	44109315
chr1	44132355	44132856
chr1	44140589	44141090
chr1	44177578	44178079
chr1	44202078	44202579
chr1	44216799	44217300
chr1	44223457	44223958
chr1	44232313	44232814
chr1	44232886	44233387
chr1	44249254	44249755
chr1	44249484	44249985
chr1	44258920	44259421
chr1	44302147	44302648
chr1	44304835	44305336
chr1	44313373	44313874
chr1	44321359	44321860
chr1	44380207	44380708
chr1	44459615	44460116
chr1	44497937	44498438
chr1	44632556	44633057
chr1	44793377	44793878
chr1	44796017	44796518
chr1	44889236	44889737
chr1	44967188	44967689
chr1	44997625	44998126
chr1	45042390	45042891
chr1	45265333	45265834
chr1	45397813	45398314
chr1	45407584	45408085
chr1	45409649	45410150
chr1	45430000	45430501
chr1	45452084	45452585
chr1	45659606	45660107
chr1	45663722	45664223
chr1	45704570	45705071
chr1	45731814	45732315
chr1	45801638	45802139
chr1	45858842	45859343
chr1	45868840	45869341
chr1	45902384	45902885
chr1	45939366	45939867
chr1	45961974	45962475
chr1	45990987	45991488
chr1	46017893	46018394
chr1	46078858	46079359
chr1	46132163	46132664
chr1	46234761	46235262
chr1	46275408	46275909
chr1	46417657	46418158
chr1	46440595	46441096
chr1	46444621	46445122
chr1	46518636	46519137
chr1	46543356	46543857
chr1	46648831	46649332
chr1	46684090	46684591
chr1	46718744	46719245
chr1	46862084	46862585
chr1	46962741	46963242
chr1	47077254	47077755
chr1	47105187	47105688
chr1	47223316	47223817
chr1	47254142	47254643
chr1	47425833	47426334
chr1	47791130	47791631
chr1	47874256	47874757
chr1	48035358	48035859
chr1	49020879	49021380
chr1	49700672	49701173
chr1	49882279	49882780
chr1	49934524	49935025
chr1	50946767	50947268
chr1	50959259	50959760
chr1	50987204	50987705
chr1	51066686	51067187
chr1	51069158	51069659
chr1	51076234	51076735
chr1	51123981	51124482
chr1	51127212	51127713
chr1	51155153	51155654
chr1	51171347	51171848
chr1	51365991	51366492
chr1	51425884	51426385
chr1	51494627	51495128
chr1	51609235	51609736
chr1	51780556	51781057
chr1	51841280	51841781
chr1	51956897	51957398
chr1	51957214	51957715
chr1	52004052	52004553
chr1	52058299	52058800
chr1	52094480	52094981
chr1	52102649	52103150
chr1	52157848	52158349
chr1	52221998	52222499
chr1	52413962	52414463
chr1	52429322	52429823
chr1	52464261	52464762
chr1	52503322	52503823
chr1	52665075	52665576
chr1	52665394	52665895
chr1	52675091	52675592
chr1	52752060	52752561
chr1	52798210	52798711
chr1	52799783	52800284
chr1	52834543	52835044
chr1	52879131	52879632
chr1	52984641	52985142
chr1	53022562	53023063
chr1	53326173	53326674
chr1	53375486	53375987
chr1	53387469	53387970
chr1	53449755	53450256
chr1	53466832	53467333
chr1	53467941	53468442
chr1	53499353	53499854
chr1	53517235	53517736
chr1	54303856	54304357
chr1	54465629	54466130
chr1	54633382	54633883
chr1	54752750	54753251
chr1	54788947	54789448
chr1	54794939	54795440
chr1	54950972	54951473
chr1	55007574	55008075
chr1	55008001	55008502
chr1	55081263	55081764
chr1	55260277	55260778
chr1	55261943	55262444
chr1	55305371	55305872
chr1	55353614	55354115
chr1	55370022	55370523
chr1	55388791	55389292
chr1	55402399	55402900
chr1	55525644	55526145
chr1	55678418	55678919
chr1	55751373	55751874
chr1	55786495	55786996
chr1	56042483	56042984
chr1	56043041	56043542
chr1	56046509	56047010
chr1	56046927	56047428
chr1	56122375	56122876
chr1	56382321	56382822
chr1	56386047	56386548
chr1	56416432	56416933
chr1	56526461	56526962
chr1	56530270	56530771
chr1	56577901	56578402
chr1	56598101	56598602
chr1	56606587	56607088
chr1	56654801	56655302
chr1	56668709	56669210
chr1	56681343	56681844
chr1	56714280	56714781
chr1	56725538	56726039
chr1	56743749	56744250
chr1	56775299	56775800
chr1	56823998	56824499
chr1	56827803	56828304
chr1	56828659	56829160
chr1	56844081	56844582
chr1	56888198	56888699
chr1	56897809	56898310
chr1	56905268	56905769
chr1	56941349	56941850
chr1	56972541	56973042
chr1	57082535	57083036
chr1	57224987	57225488
chr1	57246496	57246997
chr1	57260753	57261254
chr1	57284606	57285107
chr1	57344940	57345441
chr1	57576887	57577388
chr1	57613171	57613672
chr1	57720657	57721158
chr1	57906595	57907096
chr1	58004660	58005161
chr1	58011745	58012246
chr1	58297202	58297703
chr1	58339664	58340165
chr1	58423246	58423747
chr1	58917198	58917699
chr1	59033475	59033976
chr1	59038285	59038786
chr1	59083830	59084331
chr1	59085838	59086339
chr1	59160955	59161456
chr1	59192923	59193424
chr1	59228479	59228980
chr1	59245262	59245763
chr1	59260171	59260672
chr1	59276978	59277479
chr1	59278467	59278968
chr1	59280789	59281290
chr1	59408420	59408921
chr1	59523505	59524006
chr1	59573158	59573659
chr1	59634944	59635445
chr1	59899823	59900324
chr1	60139173	60139674
chr1	60186358	60186859
chr1	60195799	60196300
chr1	60209361	60209862
chr1	60227067	60227568
chr1	60230640	60231141
chr1	60358555	60359056
chr1	60432961	60433462
chr1	60494227	60494728
chr1	60510405	60510906
chr1	60533782	60534283
chr1	60568756	60569257
chr1	60641018	60641519
chr1	60763863	60764364
chr1	60953890	60954391
chr1	61439312	61439813
chr1	61477164	61477665
chr1	61614955	61615456
chr1	61646606	61647107
chr1	61658752	61659253
chr1	61686141	61686642
chr1	61804098	61804599
chr1	61804553	61805054
chr1	61824404	61824905
chr1	61858639	61859140
chr1	61984607	61985108
chr1	62051350	62051851
chr1	62071483	62071984
chr1	62220075	62220576
chr1	62444510	62445011
chr1	62646270	62646771
chr1	62742331	62742832
chr1	62794322	62794823
chr1	62824647	62825148
chr1	62987692	62988193
chr1	63140573	63141074
chr1	63152952	63153453
chr1	63156026	63156527
chr1	63347731	63348232
chr1	63600268	63600769
chr1	63777661	63778162
chr1	63782987	63783488
chr1	63963730	63964231
chr1	63988668	63989169
chr1	64013244	64013745
chr1	64095773	64096274
chr1	64197108	64197609
chr1	64338879	64339380
chr1	64626585	64627086
chr1	64728828	64729329
chr1	64748027	64748528
chr1	64757859	64758360
chr1	64809193	64809694
chr1	64853954	64854455
chr1	64961356	64961857
chr1	64982499	64983000
chr1	64991913	64992414
chr1	65030847	65031348
chr1	65038091	65038592
chr1	65102009	65102510
chr1	65367367	65367868
chr1	65456092	65456593
chr1	65510310	65510811
chr1	65606971	65607472
chr1	65607666	65608167
chr1	65614105	65614606
chr1	65880163	65880664
chr1	66113706	66114207
chr1	66314135	66314636
chr1	66451532	66452033
chr1	66551259	66551760
chr1	66626708	66627209
chr1	66632625	66633126
chr1	66634875	66635376
chr1	66646532	66647033
chr1	66727156	66727657
chr1	66736920	66737421
chr1	66737359	66737860
chr1	66744241	66744742
chr1	66801259	66801760
chr1	66979986	66980487
chr1	66997434	66997935
chr1	67005031	67005532
chr1	67008994	67009495
chr1	67041340	67041841
chr1	67142661	67143162
chr1	67162467	67162968
chr1	67351862	67352363
chr1	67399994	67400495
chr1	67518641	67519142
chr1	67551006	67551507
chr1	67692857	67693358
chr1	67813921	67814422
chr1	67821309	67821810
chr1	67822836	67823337
chr1	67832555	67833056
chr1	67837486	67837987
chr1	68041468	68041969
chr1	68083942	68084443
chr1	68100710	68101211
chr1	68104497	68104998
chr1	68152223	68152724
chr1	68190486	68190987
chr1	68190777	68191278
chr1	68269267	68269768
chr1	68292591	68293092
chr1	68297658	68298159
chr1	68302349	68302850
chr1	68312194	68312695
chr1	68445779	68446280
chr1	68477646	68478147
chr1	68570700	68571201
chr1	68573611	68574112
chr1	68779360	68779861
chr1	68806452	68806953
chr1	68839550	68840051
chr1	68844308	68844809
chr1	68849924	68850425
chr1	68903844	68904345
chr1	69131009	69131510
chr1	69240721	69241222
chr1	69243226	69243727
chr1	69277554	69278055
chr1	69395437	69395938
chr1	69439851	69440352
chr1	69440319	69440820
chr1	69520865	69521366
chr1	69657072	69657573
chr1	69959759	69960260
chr1	70127910	70128411
chr1	70147214	70147715
chr1	70159546	70160047
chr1	70700348	70700849
chr1	70750033	70750534
chr1	70796596	70797097
chr1	71266545	71267046
chr1	71307565	71308066
chr1	71697418	71697919
chr1	72030975	72031476
chr1	72043164	72043665
chr1	72087319	72087820
chr1	72284338	72284839
chr1	72451777	72452278
chr1	72463836	72464337
chr1	72466427	72466928
chr1	72986622	72987123
chr1	73103160	73103661
chr1	73230426	73230927
chr1	73325579	73326080
chr1	73361014	73361515
chr1	73403807	73404308
chr1	73499229	73499730
chr1	73593500	73594001
chr1	74043864	74044365
chr1	74124727	74125228
chr1	74125204	74125705
chr1	74139629	74140130
chr1	74203057	74203558
chr1	74231367	74231868
chr1	74265241	74265742
chr1	74290971	74291472
chr1	74318165	74318666
chr1	74324887	74325388
chr1	74349408	74349909
chr1	74386332	74386833
chr1	74569803	74570304
chr1	74625663	74626164
chr1	74792268	74792769
chr1	74805975	74806476
chr1	74896039	74896540
chr1	74896437	74896938
chr1	75084507	75085008
chr1	75404217	75404718
chr1	75410332	75410833
chr1	75556136	75556637
chr1	75557723	75558224
chr1	75757651	75758152
chr1	75770534	75771035
chr1	75902848	75903349
chr1	75921704	75922205
chr1	75936285	75936786
chr1	75956150	75956651
chr1	76000040	76000541
chr1	76105054	76105555
chr1	76107640	76108141
chr1	76534825	76535326
chr1	76715892	76716393
chr1	76899683	76900184
chr1	77034268	77034769
chr1	77101448	77101949
chr1	77762510	77763011
chr1	77812516	77813017
chr1	77815468	77815969
chr1	77874999	77875500
chr1	78060341	78060842
chr1	78083043	78083544
chr1	78149907	78150408
chr1	78216492	78216993
chr1	78499464	78499965
chr1	78642032	78642533
chr1	78666691	78667192
chr1	78705828	78706329
chr1	78966881	78967382
chr1	79015031	79015532
chr1	79424399	79424900
chr1	79555536	79556037
chr1	79571179	79571680
chr1	79617119	79617620
chr1	79664530	79665031
chr1	79721065	79721566
chr1	79723140	79723641
chr1	79829125	79829626
chr1	79974540	79975041
chr1	80004292	80004793
chr1	80061973	80062474
chr1	80129578	80130079
chr1	80145554	80146055
chr1	80210379	80210880
chr1	80244163	80244664
chr1	80347838	80348339
chr1	80463578	80464079
chr1	80521802	80522303
chr1	80544213	80544714
chr1	81583654	81584155
chr1	81651905	81652406
chr1	81669948	81670449
chr1	81951453	81951954
chr1	81975241	81975742
chr1	82006137	82006638
chr1	82132727	82133228
chr1	82143981	82144482
chr1	82144415	82144916
chr1	82147217	82147718
chr1	82180262	82180763
chr1	82340059	82340560
chr1	82450477	82450978
chr1	82619998	82620499
chr1	82691779	82692280
chr1	82787465	82787966
chr1	82860224	82860725
chr1	83028424	83028925
chr1	83152334	83152835
chr1	83389526	83390027
chr1	83445414	83445915
chr1	83491822	83492323
chr1	83573301	83573802
chr1	83597170	83597671
chr1	84086524	84087025
chr1	84189660	84190161
chr1	84201039	84201540
chr1	84229192	84229693
chr1	84330609	84331110
chr1	84474145	84474646
chr1	84483594	84484095
chr1	84485171	84485672
chr1	84573199	84573700
chr1	84579126	84579627
chr1	84646952	84647453
chr1	84672016	84672517
chr1	84712787	84713288
chr1	84836522	84837023
chr1	85051427	85051928
chr1	85142525	85143026
chr1	85163760	85164261
chr1	85192195	85192696
chr1	85193275	85193776
chr1	85215891	85216392
chr1	85219075	85219576
chr1	85238768	85239269
chr1	85300772	85301273
chr1	85308331	85308832
chr1	85346468	85346969
chr1	85528157	85528658
chr1	85577653	85578154
chr1	85664483	85664984
chr1	85667561	85668062
chr1	85689782	85690283
chr1	85690642	85691143
chr1	85742347	85742848
chr1	85755096	85755597
chr1	85763368	85763869
chr1	85775187	85775688
chr1	85804732	85805233
chr1	85917858	85918359
chr1	85926220	85926721
chr1	85961335	85961836
chr1	86021850	86022351
chr1	86037628	86038129
chr1	86535305	86535806
chr1	86570730	86571231
chr1	86727007	86727508
chr1	86887390	86887891
chr1	86889503	86890004
chr1	87012322	87012823
chr1	87061956	87062457
chr1	87062642	87063143
chr1	87102493	87102994
chr1	87417954	87418455
chr1	87649363	87649864
chr1	87752917	87753418
chr1	87796678	87797179
chr1	87799478	87799979
chr1	87814286	87814787
chr1	87858066	87858567
chr1	87858369	87858870
chr1	87899130	87899631
chr1	87902092	87902593
chr1	87902948	87903449
chr1	87938964	87939465
chr1	87971386	87971887
chr1	87971776	87972277
chr1	87995463	87995964
chr1	88023944	88024445
chr1	88056200	88056701
chr1	88183935	88184436
chr1	88406007	88406508
chr1	88526036	88526537
chr1	88526666	88527167
chr1	88934694	88935195
chr1	88947344	88947845
chr1	89048487	89048988
chr1	89166974	89167475
chr1	89230325	89230826
chr1	89458628	89459129
chr1	89607265	89607766
chr1	89687994	89688495
chr1	89697757	89698258
chr1	89700595	89701096
chr1	89720650	89721151
chr1	89737228	89737729
chr1	89771804	89772305
chr1	89829123	89829624
chr1	89830373	89830874
chr1	89918636	89919137
chr1	89991967	89992468
chr1	90013207	90013708
chr1	90081753	90082254
chr1	90233120	90233621
chr1	90274073	90274574
chr1	90320732	90321233
chr1	90349456	90349957
chr1	90352777	90353278
chr1	90355608	90356109
chr1	90404508	90405009
chr1	90422478	90422979
chr1	90430708	90431209
chr1	90437566	90438067
chr1	90532867	90533368
chr1	90627753	90628254
chr1	90645519	90646020
chr1	90812859	90813360
chr1	91045693	91046194
chr1	91286901	91287402
chr1	91375424	91375925
chr1	91376544	91377045
chr1	91402382	91402883
chr1	91424881	91425382
chr1	91614186	91614687
chr1	91790961	91791462
chr1	91874949	91875450
chr1	91995413	91995914
chr1	92055938	92056439
chr1	92210608	92211109
chr1	92211450	92211951
chr1	92226880	92227381
chr1	92250431	92250932
chr1	92256673	92257174
chr1	92283406	92283907
chr1	92329773	92330274
chr1	92338083	92338584
chr1	92346692	92347193
chr1	92756643	92757144
chr1	93009318	93009819
chr1	93337079	93337580
chr1	93373474	93373975
chr1	93374702	93375203
chr1	93427290	93427791
chr1	93438718	93439219
chr1	93451436	93451937
chr1	93506663	93507164
chr1	93544487	93544988
chr1	93608661	93609162
chr1	93688797	93689298
chr1	93760195	93760696
chr1	93768381	93768882
chr1	93787888	93788389
chr1	93808187	93808688
chr1	93814727	93815228
chr1	93990967	93991468
chr1	94018205	94018706
chr1	94058518	94059019
chr1	94063277	94063778
chr1	94078602	94079103
chr1	94138922	94139423
chr1	94164170	94164671
chr1	94220801	94221302
chr1	94336848	94337349
chr1	94426329	94426830
chr1	94426732	94427233
chr1	94437454	94437955
chr1	94493276	94493777
chr1	94516103	94516604
chr1	94547368	94547869
chr1	94648090	94648591
chr1	94762528	94763029
chr1	94764192	94764693
chr1	94782850	94783351
chr1	94785211	94785712
chr1	94887346	94887847
chr1	94906895	94907396
chr1	95100264	95100765
chr1	95126276	95126777
chr1	95142172	95142673
chr1	95302420	95302921
chr1	95341187	95341688
chr1	95473176	95473677
chr1	95603742	95604243
chr1	95632948	95633449
chr1	95699358	95699859
chr1	95818132	95818633
chr1	95818743	95819244
chr1	96151277	96151778
chr1	96156631	96157132
chr1	96188822	96189323
chr1	96208087	96208588
chr1	96320413	96320914
chr1	96368592	96369093
chr1	96377557	96378058
chr1	96389443	96389944
chr1	96475646	96476147
chr1	96475988	96476489
chr1	96514022	96514523
chr1	96562720	96563221
chr1	96720934	96721435
chr1	96756935	96757436
chr1	96990200	96990701
chr1	97184770	97185271
chr1	97496802	97497303
chr1	97527109	97527610
chr1	97556741	97557242
chr1	97559239	97559740
chr1	97653817	97654318
chr1	97658773	97659274
chr1	97678213	97678714
chr1	97927154	97927655
chr1	97950122	97950623
chr1	97953984	97954485
chr1	98220855	98221356
chr1	98359165	98359666
chr1	98608874	98609375
chr1	98617154	98617655
chr1	98622894	98623395
chr1	98672855	98673356
chr1	98673683	98674184
chr1	98687534	98688035
chr1	98786739	98787240
chr1	98791089	98791590
chr1	98791602	98792103
chr1	98957377	98957878
chr1	98981799	98982300
chr1	99205295	99205796
chr1	99394807	99395308
chr1	99587573	99588074
chr1	99650440	99650941
chr1	99956171	99956672
chr1	100009642	100010143
chr1	100021884	100022385
chr1	100026164	100026665
chr1	100045888	100046389
chr1	100087187	100087688
chr1	100111342	100111843
chr1	100116183	100116684
chr1	100125283	100125784
chr1	100139399	100139900
chr1	100141388	100141889
chr1	100192348	100192849
chr1	100205601	100206102
chr1	100229453	100229954
chr1	100279866	100280367
chr1	100435265	100435766
chr1	100459912	100460413
chr1	100471105	100471606
chr1	100515536	100516037
chr1	100517381	100517882
chr1	100668332	100668833
chr1	100781008	100781509
chr1	100833317	100833818
chr1	100853834	100854335
chr1	100880272	100880773
chr1	100880863	100881364
chr1	100895812	100896313
chr1	101264986	101265487
chr1	101333288	101333789
chr1	101349424	101349925
chr1	101479301	101479802
chr1	103765865	103766366
chr1	104433430	104433931
chr1	104479777	104480278
chr1	104496425	104496926
chr1	104887824	104888325
chr1	104900957	104901458
chr1	104945863	104946364
chr1	104964359	104964860
chr1	104973884	104974385
chr1	105393618	105394119
chr1	105810986	105811487
chr1	106137365	106137866
chr1	106457770	106458271
chr1	106607335	106607836
chr1	106869824	106870325
chr1	107031727	107032228
chr1	107158000	107158501
chr1	107540986	107541487
chr1	108078792	108079293
chr1	108115499	108116000
chr1	108209799	108210300
chr1	108220238	108220739
chr1	108332764	108333265
chr1	109076058	109076559
chr1	109079509	109080010
chr1	109112657	109113158
chr1	109140041	109140542
chr1	109408056	109408557
chr1	109423895	109424396
chr1	109431862	109432363
chr1	109570955	109571456
chr1	109592857	109593358
chr1	109609626	109610127
chr1	109638741	109639242
chr1	109658865	109659366
chr1	109688198	109688699
chr1	109704881	109705382
chr1	109740579	109741080
chr1	109743991	109744492
chr1	109752660	109753161
chr1	109783222	109783723
chr1	109805785	109806286
chr1	110055689	110056190
chr1	110262485	110262986
chr1	110363128	110363629
chr1	110499128	110499629
chr1	110786262	110786763
chr1	110802374	110802875
chr1	110936446	110936947
chr1	111019658	111020159
chr1	111421162	111421663
chr1	111679881	111680382
chr1	111752265	111752766
chr1	111757045	111757546
chr1	111775053	111775554
chr1	111846183	111846684
chr1	111989880	111990381
chr1	112084620	112085121
chr1	112090817	112091318
chr1	112094569	112095070
chr1	112098972	112099473
chr1	112135593	112136094
chr1	112280954	112281455
chr1	112480721	112481222
chr1	112491352	112491853
chr1	112603634	112604135
chr1	112862185	112862686
chr1	112901264	112901765
chr1	113054069	113054570
chr1	113071945	113072446
chr1	113148538	113149039
chr1	113153728	113154229
chr1	113154651	113155152
chr1	113170252	113170753
chr1	113179982	113180483
chr1	113229947	113230448
chr1	113305626	113306127
chr1	113519327	113519828
chr1	113520633	113521134
chr1	113532864	113533365
chr1	113555108	113555609
chr1	113564329	113564830
chr1	113790393	113790894
chr1	113869535	113870036
chr1	113962761	113963262
chr1	114087767	114088268
chr1	114135738	114136239
chr1	114205887	114206388
chr1	114217202	114217703
chr1	114348246	114348747
chr1	114474202	114474703
chr1	114507336	114507837
chr1	114592349	114592850
chr1	114778534	114779035
chr1	114878914	114879415
chr1	114959309	114959810
chr1	115106761	115107262
chr1	115138198	115138699
chr1	115153156	115153657
chr1	115161153	115161654
chr1	115200202	115200703
chr1	115345652	115346153
chr1	115502204	115502705
chr1	115594451	115594952
chr1	115700698	115701199
chr1	115765168	115765669
chr1	115765581	115766082
chr1	115767229	115767730
chr1	115843082	115843583
chr1	115844979	115845480
chr1	115845548	115846049
chr1	115954328	115954829
chr1	116066696	116067197
chr1	116148860	116149361
chr1	116197823	116198324
chr1	116235426	116235927
chr1	116257243	116257744
chr1	116314346	116314847
chr1	116381789	116382290
chr1	116395140	116395641
chr1	116420028	116420529
chr1	116575870	116576371
chr1	116674406	116674907
chr1	116805082	116805583
chr1	116809283	116809784
chr1	116820145	116820646
chr1	116822229	116822730
chr1	116832889	116833390
chr1	116854523	116855024
chr1	116883048	116883549
chr1	116917694	116918195
chr1	117044089	117044590
chr1	117080132	117080633
chr1	117099192	117099693
chr1	117118292	117118793
chr1	117225199	117225700
chr1	117236401	117236902
chr1	117262922	117263423
chr1	117265021	117265522
chr1	117281210	117281711
chr1	117351029	117351530
chr1	117352683	117353184
chr1	117421678	117422179
chr1	117429021	117429522
chr1	117512822	117513323
chr1	117588026	117588527
chr1	117593893	117594394
chr1	117632607	117633108
chr1	117635756	117636257
chr1	117714447	117714948
chr1	117722092	117722593
chr1	117722829	117723330
chr1	117773838	117774339
chr1	117809704	117810205
chr1	118041626	118042127
chr1	118087038	118087539
chr1	118752204	118752705
chr1	118879346	118879847
chr1	119017932	119018433
chr1	119028371	119028872
chr1	119104903	119105404
chr1	119178264	119178765
chr1	119469637	119470138
chr1	119507351	119507852
chr1	119772116	119772617
chr1	119796007	119796508
chr1	119796882	119797383
chr1	119856980	119857481
chr1	119861493	119861994
chr1	119861915	119862416
chr1	120010198	120010699
chr1	120026014	120026515
chr1	120047422	120047923
chr1	120050511	120051012
chr1	120107685	120108186
chr1	120194285	120194786
chr1	120216710	120217211
chr1	120289962	120290463
chr1	120472300	120472801
chr1	120490203	120490704
chr1	120492254	120492755
chr1	120516565	120517066
chr1	121132849	121133350
chr1	121315591	121316092
chr1	121333201	121333702
chr1	144010588	144011089
chr1	145000241	145000742
chr1	145000588	145001089
chr1	145382853	145383354
chr1	145405510	145406011
chr1	145543062	145543563
chr1	145575680	145576181
chr1	145648839	145649340
chr1	146582501	146583002
chr1	146610491	146610992
chr1	146634772	146635273
chr1	146638833	146639334
chr1	146656943	146657444
chr1	146709846	146710347
chr1	146723646	146724147
chr1	146957784	146958285
chr1	147189162	147189663
chr1	147356365	147356866
chr1	147730783	147731284
chr1	147764560	147765061
chr1	148241325	148241826
chr1	149935278	149935779
chr1	149967813	149968314
chr1	149993773	149994274
chr1	149999930	150000431
chr1	150156090	150156591
chr1	150192015	150192516
chr1	150488189	150488690
chr1	150510366	150510867
chr1	150569383	150569884
chr1	150596668	150597169
chr1	150663121	150663622
chr1	150737096	150737597
chr1	150750743	150751244
chr1	150777118	150777619
chr1	150847207	150847708
chr1	151031085	151031586
chr1	151167621	151168122
chr1	151216605	151217106
chr1	151397958	151398459
chr1	151522255	151522756
chr1	151522921	151523422
chr1	151537991	151538492
chr1	151541059	151541560
chr1	151543348	151543849
chr1	151556587	151557088
chr1	151558547	151559048
chr1	151606078	151606579
chr1	151686253	151686754
chr1	151830458	151830959
chr1	151840807	151841308
chr1	151859446	151859947
chr1	151920929	151921430
chr1	151942479	151942980
chr1	151973695	151974196
chr1	151996559	151997060
chr1	152007451	152007952
chr1	152018783	152019284
chr1	152020056	152020557
chr1	152023713	152024214
chr1	152063380	152063881
chr1	152077309	152077810
chr1	152140194	152140695
chr1	152155452	152155953
chr1	152163695	152164196
chr1	152164277	152164778
chr1	152222683	152223184
chr1	152339804	152340305
chr1	152365356	152365857
chr1	152591377	152591878
chr1	152690665	152691166
chr1	152706326	152706827
chr1	152712217	152712718
chr1	152729299	152729800
chr1	152732197	152732698
chr1	152742079	152742580
chr1	152747278	152747779
chr1	152758400	152758901
chr1	152778957	152779458
chr1	152783478	152783979
chr1	152852794	152853295
chr1	152859488	152859989
chr1	152913766	152914267
chr1	152926182	152926683
chr1	152944906	152945407
chr1	153005395	153005896
chr1	153007700	153008201
chr1	153018903	153019404
chr1	153079468	153079969
chr1	153120522	153121023
chr1	153147039	153147540
chr1	153153060	153153561
chr1	153189095	153189596
chr1	153241460	153241961
chr1	153245964	153246465
chr1	153255107	153255608
chr1	153260972	153261473
chr1	153264897	153265398
chr1	153355699	153356200
chr1	153402222	153402723
chr1	153495869	153496370
chr1	153498543	153499044
chr1	153499515	153500016
chr1	153537828	153538329
chr1	153538888	153539389
chr1	153539896	153540397
chr1	153744893	153745394
chr1	153747169	153747670
chr1	153853335	153853836
chr1	153872916	153873417
chr1	153879087	153879588
chr1	153985670	153986171
chr1	154169331	154169832
chr1	154280930	154281431
chr1	154293235	154293736
chr1	154363494	154363995
chr1	154390674	154391175
chr1	154568137	154568638
chr1	154732806	154733307
chr1	154785905	154786406
chr1	154883249	154883750
chr1	154909902	154910403
chr1	154973478	154973979
chr1	154976160	154976661
chr1	155092611	155093112
chr1	155096161	155096662
chr1	155097799	155098300
chr1	155099602	155100103
chr1	155100031	155100532
chr1	155214365	155214866
chr1	155349719	155350220
chr1	155442698	155443199
chr1	155518094	155518595
chr1	155532551	155533052
chr1	155653661	155654162
chr1	155683568	155684069
chr1	155691586	155692087
chr1	155698657	155699158
chr1	155729991	155730492
chr1	155733236	155733737
chr1	155739869	155740370
chr1	155743020	155743521
chr1	155751798	155752299
chr1	155762860	155763361
chr1	155833488	155833989
chr1	155892833	155893334
chr1	155893072	155893573
chr1	155895144	155895645
chr1	155908555	155909056
chr1	156033298	156033799
chr1	156070024	156070525
chr1	156073236	156073737
chr1	156073811	156074312
chr1	156093439	156093940
chr1	156123104	156123605
chr1	156272992	156273493
chr1	156426221	156426722
chr1	156480759	156481260
chr1	156592351	156592852
chr1	157114267	157114768
chr1	157980077	157980578
chr1	157991505	157992006
chr1	157992813	157993314
chr1	157998660	157999161
chr1	158110544	158111045
chr1	158130656	158131157
chr1	158131144	158131645
chr1	158241791	158242292
chr1	158658872	158659373
chr1	158688274	158688775
chr1	158689956	158690457
chr1	158979476	158979977
chr1	158982322	158982823
chr1	159060921	159061422
chr1	159163684	159164185
chr1	159231471	159231972
chr1	159756806	159757307
chr1	159885960	159886461
chr1	159895482	159895983
chr1	159903091	159903592
chr1	159909266	159909767
chr1	159913923	159914424
chr1	159915692	159916193
chr1	160309130	160309631
chr1	160614807	160615308
chr1	160737433	160737934
chr1	160751036	160751537
chr1	160887676	160888177
chr1	160921870	160922371
chr1	160988988	160989489
chr1	160989728	160990229
chr1	160991676	160992177
chr1	160992205	160992706
chr1	161044404	161044905
chr1	161053265	161053766
chr1	161059130	161059631
chr1	161214624	161215125
chr1	161248971	161249472
chr1	161290822	161291323
chr1	161299169	161299670
chr1	161346222	161346723
chr1	161450522	161451023
chr1	161661625	161662126
chr1	161731896	161732397
chr1	161772933	161773434
chr1	161840442	161840943
chr1	161913260	161913761
chr1	161914729	161915230
chr1	162129156	162129657
chr1	162254920	162255421
chr1	162319784	162320285
chr1	162440172	162440673
chr1	162440971	162441472
chr1	162553841	162554342
chr1	162666063	162666564
chr1	162883095	162883596
chr1	163252119	163252620
chr1	163259974	163260475
chr1	163699596	163700097
chr1	163765521	163766022
chr1	163793226	163793727
chr1	163822985	163823486
chr1	163861720	163862221
chr1	163989280	163989781
chr1	164236400	164236901
chr1	164239511	164240012
chr1	164244629	164245130
chr1	164266930	164267431
chr1	164442851	164443352
chr1	164468988	164469489
chr1	164571181	164571682
chr1	164580954	164581455
chr1	164629263	164629764
chr1	164640473	164640974
chr1	164670336	164670837
chr1	164680705	164681206
chr1	164688789	164689290
chr1	164704892	164705393
chr1	164756951	164757452
chr1	164794894	164795395
chr1	164807962	164808463
chr1	164838160	164838661
chr1	165005311	165005812
chr1	165354431	165354932
chr1	165364729	165365230
chr1	165389872	165390373
chr1	165425346	165425847
chr1	165820193	165820694
chr1	165854073	165854574
chr1	165857067	165857568
chr1	165857416	165857917
chr1	165870215	165870716
chr1	165872892	165873393
chr1	165882093	165882594
chr1	166177597	166178098
chr1	166324323	166324824
chr1	166572494	166572995
chr1	166607696	166608197
chr1	166758455	166758956
chr1	167086997	167087498
chr1	167098294	167098795
chr1	167166162	167166663
chr1	167477536	167478037
chr1	167504447	167504948
chr1	167511823	167512324
chr1	167542218	167542719
chr1	167586160	167586661
chr1	167589563	167590064
chr1	167622274	167622775
chr1	167632148	167632649
chr1	167638372	167638873
chr1	167666932	167667433
chr1	167710353	167710854
chr1	167732671	167733172
chr1	167768927	167769428
chr1	167786431	167786932
chr1	167793610	167794111
chr1	167799090	167799591
chr1	167912708	167913209
chr1	168082145	168082646
chr1	168120844	168121345
chr1	168257369	168257870
chr1	168412928	168413429
chr1	168445783	168446284
chr1	168677811	168678312
chr1	168679116	168679617
chr1	168732233	168732734
chr1	168803588	168804089
chr1	168808297	168808798
chr1	168811448	168811949
chr1	168818306	168818807
chr1	168876210	168876711
chr1	168960916	168961417
chr1	169064336	169064837
chr1	169071650	169072151
chr1	169085054	169085555
chr1	169101720	169102221
chr1	169172086	169172587
chr1	169209956	169210457
chr1	169306747	169307248
chr1	169420638	169421139
chr1	169498447	169498948
chr1	169535091	169535592
chr1	169553670	169554171
chr1	169613318	169613819
chr1	169614462	169614963
chr1	169629563	169630064
chr1	169860377	169860878
chr1	170046705	170047206
chr1	170101290	170101791
chr1	170210079	170210580
chr1	170330642	170331143
chr1	170417780	170418281
chr1	170418261	170418762
chr1	170418783	170419284
chr1	170530600	170531101
chr1	170532065	170532566
chr1	170552283	170552784
chr1	170666005	170666506
chr1	170689745	170690246
chr1	170897327	170897828
chr1	171077852	171078353
chr1	171095584	171096085
chr1	171096568	171097069
chr1	171110007	171110508
chr1	171193314	171193815
chr1	171236437	171236938
chr1	171291253	171291754
chr1	171377326	171377827
chr1	171393538	171394039
chr1	171396775	171397276
chr1	171474786	171475287
chr1	171519132	171519633
chr1	171680737	171681238
chr1	171711902	171712403
chr1	171718765	171719266
chr1	171831281	171831782
chr1	171867979	171868480
chr1	171878795	171879296
chr1	171882464	171882965
chr1	171887832	171888333
chr1	172019585	172020086
chr1	172107732	172108233
chr1	172112751	172113252
chr1	172115453	172115954
chr1	172129463	172129964
chr1	172146933	172147434
chr1	172526309	172526810
chr1	172688165	172688666
chr1	172745312	172745813
chr1	172806840	172807341
chr1	172828321	172828822
chr1	172875881	172876382
chr1	172886961	172887462
chr1	172945418	172945919
chr1	173082084	173082585
chr1	173083538	173084039
chr1	173097797	173098298
chr1	173159710	173160211
chr1	173244071	173244572
chr1	173408179	173408680
chr1	173481403	173481904
chr1	173630368	173630869
chr1	173647821	173648322
chr1	173837045	173837546
chr1	174001775	174002276
chr1	174057666	174058167
chr1	174122697	174123198
chr1	174375532	174376033
chr1	174488813	174489314
chr1	174900360	174900861
chr1	174933601	174934102
chr1	174935062	174935563
chr1	175164866	175165367
chr1	175166710	175167211
chr1	176125593	176126094
chr1	176169707	176170208
chr1	176212233	176212734
chr1	176214422	176214923
chr1	176409228	176409729
chr1	176417441	176417942
chr1	176484461	176484962
chr1	177633648	177634149
chr1	177914967	177915468
chr1	177953835	177954336
chr1	178239873	178240374
chr1	178247212	178247713
chr1	178310343	178310844
chr1	178487903	178488404
chr1	178498742	178499243
chr1	178531509	178532010
chr1	178540668	178541169
chr1	178542261	178542762
chr1	178624754	178625255
chr1	178744884	178745385
chr1	179008102	179008603
chr1	179022536	179023037
chr1	179088285	179088786
chr1	179125009	179125510
chr1	179132108	179132609
chr1	179139216	179139717
chr1	179228892	179229393
chr1	179339276	179339777
chr1	179468010	179468511
chr1	179606495	179606996
chr1	179851614	179852115
chr1	179885085	179885586
chr1	179885466	179885967
chr1	179929057	179929558
chr1	179995663	179996164
chr1	180112480	180112981
chr1	180279816	180280317
chr1	180313148	180313649
chr1	180320786	180321287
chr1	180372650	180373151
chr1	180485163	180485664
chr1	180491115	180491616
chr1	180498573	180499074
chr1	180532036	180532537
chr1	180535144	180535645
chr1	180543192	180543693
chr1	180544406	180544907
chr1	180554570	180555071
chr1	180572841	180573342
chr1	180580208	180580709
chr1	180582744	180583245
chr1	180583801	180584302
chr1	180602767	180603268
chr1	180605172	180605673
chr1	180784365	180784866
chr1	180991008	180991509
chr1	181002199	181002700
chr1	181013693	181014194
chr1	181040901	181041402
chr1	181068646	181069147
chr1	181104034	181104535
chr1	181128501	181129002
chr1	181220210	181220711
chr1	181313224	181313725
chr1	181455976	181456477
chr1	181510552	181511053
chr1	181616664	181617165
chr1	181643735	181644236
chr1	181737246	181737747
chr1	181899255	181899756
chr1	181931421	181931922
chr1	182057117	182057618
chr1	182062890	182063391
chr1	182070389	182070890
chr1	182090905	182091406
chr1	182091461	182091962
chr1	182098605	182099106
chr1	182108277	182108778
chr1	182113435	182113936
chr1	182142931	182143432
chr1	182144421	182144922
chr1	182150197	182150698
chr1	182186978	182187479
chr1	182278642	182279143
chr1	182286945	182287446
chr1	182573642	182574143
chr1	182612788	182613289
chr1	182730462	182730963
chr1	182771189	182771690
chr1	182798373	182798874
chr1	182838410	182838911
chr1	182931699	182932200
chr1	183048836	183049337
chr1	183129046	183129547
chr1	183134037	183134538
chr1	183181957	183182458
chr1	183197597	183198098
chr1	183203717	183204218
chr1	183252356	183252857
chr1	183305549	183306050
chr1	183343929	183344430
chr1	183348656	183349157
chr1	183354142	183354643
chr1	183374807	183375308
chr1	183440930	183441431
chr1	183443698	183444199
chr1	183453436	183453937
chr1	183453853	183454354
chr1	183486408	183486909
chr1	183543735	183544236
chr1	183589374	183589875
chr1	183773889	183774390
chr1	183835191	183835692
chr1	183840181	183840682
chr1	183850870	183851371
chr1	183851202	183851703
chr1	183855273	183855774
chr1	183923600	183924101
chr1	183964954	183965455
chr1	183966927	183967428
chr1	183971313	183971814
chr1	183990750	183991251
chr1	183997791	183998292
chr1	184038632	184039133
chr1	184042683	184043184
chr1	184301537	184302038
chr1	184356679	184357180
chr1	184372067	184372568
chr1	184386030	184386531
chr1	184391952	184392453
chr1	184393255	184393756
chr1	184473702	184474203
chr1	184514609	184515110
chr1	184559433	184559934
chr1	184566701	184567202
chr1	184581224	184581725
chr1	184587905	184588406
chr1	184636079	184636580
chr1	184773288	184773789
chr1	184790026	184790527
chr1	184836120	184836621
chr1	184884775	184885276
chr1	184898998	184899499
chr1	184906534	184907035
chr1	184923417	184923918
[truncated: 24,256 more rows]
