# Supplementary material for: p63 Directs Subtype-Specific Gene Expression in HPV+ Head and Neck Squamous Cell Carcinoma
Source: Front Oncol. 2022 May 31;12:879054. doi: 10.3389/fonc.2022.879054 (PMC9192977; doi:10.3389/fonc.2022.879054)
Supplement: Supplementary file 4 [file Table_3.xlsx]

## Sheet: SCC104 ROSE SE output
#SCC104_H3K27ac_nP Enhancers									OVERLAP_GENES	PROXIMAL_GENES	CLOSEST_GENE	enhancerRank	isSuper
47_SCC104_H3K27ac_peak_5705_lociStitched	chr1	209527286	209609997	47	64619	271201	13994.7	1	MIR205,LOC642587		LOC642587	1	1
25_SCC104_H3K27ac_peak_23542_lociStitched	chr17	19598515	19665957	25	34029	245516	22404.2	2	ALDH3A1,SLC47A2	ALDH3A2	SLC47A2	2	1
58_SCC104_H3K27ac_peak_42129_lociStitched	chr3	189579295	189668200	58	41955	160269	21248.3	3	TP63	MIR944	MIR944	3	1
33_SCC104_H3K27ac_peak_3245_lociStitched	chr1	95070850	95128365	33	30720	137806	11272.9	4			F3	4	1
19_SCC104_H3K27ac_peak_60214_lociStitched	chr9	137235762	137276844	19	27228	129938	11663.2	5	RXRA		RXRA	5	1
19_SCC104_H3K27ac_peak_13683_lociStitched	chr12	52534245	52581330	19	18823	119120	7839.65	6	KRT80	LOC283404,KRT7	KRT80	6	1
7_SCC104_H3K27ac_peak_57648_lociStitched	chr8	145002410	145031820	7	17460	116984	8673.01	7	PLEC,MIR661	GRINA,PARP10	PLEC	7	1
37_SCC104_H3K27ac_peak_40868_lociStitched	chr3	134027489	134101713	37	33851	125238	19097.8	8	AMOTL2		AMOTL2	8	1
14_SCC104_H3K27ac_peak_24237_lociStitched	chr17	39801767	39835320	14	17948	101203	5143.67	9		GAST,EIF1,KRT17,KRT16,KRT42P	KRT42P	9	1
18_SCC104_H3K27ac_peak_36419_lociStitched	chr20	60924855	60956174	18	18402	91310.5	7983.21	10	LAMA5	RPS21,C20orf151,ADRM1,CABLES2	LAMA5	10	1
11_SCC104_H3K27ac_peak_5603_lociStitched	chr1	207166300	207206033	11	21475	86653.7	5959.95	11	C1orf116	FCAMR,YOD1,PFKFB2,PIGR	C1orf116	11	1
42_SCC104_H3K27ac_peak_28579_lociStitched	chr19	39126679	39190705	42	27868	88989.7	9283.77	12	ACTN4,EIF3K	CAPN12,MAP4K1	ACTN4	12	1
2_SCC104_H3K27ac_peak_52192_lociStitched	chr7	5458452	5470490	2	11785	82595.1	4196.45	13	TNRC18		TNRC18	13	1
20_SCC104_H3K27ac_peak_34758_lociStitched	chr20	1450773	1487063	20	14335	86856.5	10019.7	14	SIRPB2	NSFL1C	SIRPB2	14	1
22_SCC104_H3K27ac_peak_1720_lociStitched	chr1	36574387	36653901	22	19736	84976.6	13429.9	15	MAP7D1,TRAPPC3	THRAP3,TEKT2,ADPRHL2,COL8A2	TRAPPC3	15	1
19_SCC104_H3K27ac_peak_24728_lociStitched	chr17	48103950	48143562	19	18750	75754	6444.87	16	ITGA3	DLX3,PDK2	ITGA3	16	1
9_SCC104_H3K27ac_peak_59983_lociStitched	chr9	132243846	132260407	9	10452	73573.9	4953.4	17			C9orf50	17	1
21_SCC104_H3K27ac_peak_35319_lociStitched	chr20	23096550	23143527	21	19150	80419.9	14755.5	18	LOC200261	CD93	LOC200261	18	1
34_SCC104_H3K27ac_peak_42192_lociStitched	chr3	190035955	190101979	34	23699	80536.1	16024	19	CLDN1	CLDN16	CLDN1	19	1
14_SCC104_H3K27ac_peak_3221_lociStitched	chr1	94988537	95020217	14	14333	70624.2	6592.61	20	F3	F3	F3	20	1
16_SCC104_H3K27ac_peak_2546_lociStitched	chr1	59033980	59062864	16	16571	68686.2	5184.68	21	TACSTD2	OMA1	TACSTD2	21	1
14_SCC104_H3K27ac_peak_1252_lociStitched	chr1	27174932	27203718	14	14936	65470.9	4303.51	22	SFN,ZDHHC18	GPATCH3,GPN2,NR0B2,NUDC	SFN	22	1
31_SCC104_H3K27ac_peak_58823_lociStitched	chr9	95468172	95553099	31	25032	75771.9	14828.3	23	BICD2	ANKRD19,IPPK,BICD2	BICD2	23	1
30_SCC104_H3K27ac_peak_2060_lociStitched	chr1	43389760	43434359	30	21668	67442.6	9526.35	24	FLJ32224,SLC2A1		FLJ32224	24	1
7_SCC104_H3K27ac_peak_10627_lociStitched	chr11	65184095	65197882	7	10714	59772.2	3573.59	25	NEAT1	FRMD8,SLC25A45,MIR612	NEAT1	25	1
12_SCC104_H3K27ac_peak_54448_lociStitched	chr7	116135068	116178646	12	16461	61231.4	5403.67	26	CAV1,CAV2		CAV1	26	1
17_SCC104_H3K27ac_peak_59705_lociStitched	chr9	127567326	127606966	17	12229	63638.1	7955.75	27	OLFML2A	NR6A1,WDR38,ARPC5L,RPL35	WDR38	27	1
3_SCC104_H3K27ac_peak_17044_lociStitched	chr14	23443625	23452688	3	7270	57320.8	1780.88	28	JUB	PRMT5,C14orf93,HAUS4	JUB	28	1
10_SCC104_H3K27ac_peak_33946_lociStitched	chr2	219744913	219774759	10	12399	59456.2	4509.73	29	WNT10A	PRKAG3,WNT6,CDK5R2	WNT10A	29	1
10_SCC104_H3K27ac_peak_12000_lociStitched	chr11	118781297	118801044	10	15541	58891.5	4403.58	30	BCL9L	CXCR5,UPK2,FOXR1	BCL9L	30	1
23_SCC104_H3K27ac_peak_10658_lociStitched	chr11	65239276	65276266	23	16229	59853.5	6206.92	31	MALAT1	NEAT1,MIR612,SCYL1,LTBP3	MALAT1	31	1
26_SCC104_H3K27ac_peak_23458_lociStitched	chr17	17804425	17862865	26	18586	62899	9630.91	32	TOM1L2	LRRC48	TOM1L2	32	1
27_SCC104_H3K27ac_peak_16785_lociStitched	chr13	109888005	109925864	27	19453	57326.1	6080.16	33			IRS2	33	1
9_SCC104_H3K27ac_peak_45308_lociStitched	chr5	452899	480898	9	10770	62846.6	11639.2	34	LOC25845,SLC9A3,EXOC3	LOC100310782,C5orf55	LOC25845	34	1
32_SCC104_H3K27ac_peak_42075_lociStitched	chr3	189507447	189566299	32	21197	65443.4	14265.7	35	TP63,MIR944	TP63	MIR944	35	1
14_SCC104_H3K27ac_peak_23302_lociStitched	chr17	15546343	15566579	14	11513	54797.1	4437.75	36	TRIM16	ZNF286A,CDRT1	TRIM16	36	1
15_SCC104_H3K27ac_peak_59916_lociStitched	chr9	131650217	131676229	15	13170	56961.1	6687.69	37	LRRC8A	PHYHD1,CCBL1,NUP188,DOLK	LRRC8A	37	1
25_SCC104_H3K27ac_peak_15827_lociStitched	chr13	30249532	30282146	25	21482	54579.5	4337.66	38			SLC7A1	38	1
7_SCC104_H3K27ac_peak_38494_lociStitched	chr22	46451472	46478923	7	20784	53021.6	3104.71	39	LOC150381	LOC400931,C22orf26,MIRLET7A3,MIR3619,LOC100271722,MIRLET7B,LOC730668	C22orf26	39	1
15_SCC104_H3K27ac_peak_41420_lociStitched	chr3	159475372	159507537	15	12717	57932.4	8205.29	40	IQCJ-SCHIP1,SCHIP1		SCHIP1	40	1
14_SCC104_H3K27ac_peak_27924_lociStitched	chr19	13949437	13973227	14	14261	51476.8	2255.29	41		MIR181C,ZSWIM4,MIR27A,MIR24-2,MIR23A,MIR181D,CC2D1A,NANOS3,C19orf57,LOC284454	MIR23A	41	1
14_SCC104_H3K27ac_peak_35419_lociStitched	chr20	30175220	30201090	14	12626	53268.9	5021.37	42	ID1,MIR3193	PSIMCT-1,COX4I2	ID1	42	1
6_SCC104_H3K27ac_peak_60186_lociStitched	chr9	136736909	136749027	6	8271	51901.4	3822.02	43	VAV2		VAV2	43	1
25_SCC104_H3K27ac_peak_663_lociStitched	chr1	16466392	16543889	25	19420	59525.4	11593.6	44	EPHA2,ARHGEF19	C1orf89	EPHA2	44	1
10_SCC104_H3K27ac_peak_52013_lociStitched	chr7	551017	583035	10	10780	57289.8	9794.31	45	FLJ44511,PDGFA		FLJ44511	45	1
5_SCC104_H3K27ac_peak_3181_lociStitched	chr1	94156679	94171787	5	11461	50921.5	3618.37	46		BCAR3	BCAR3	46	1
25_SCC104_H3K27ac_peak_16328_lociStitched	chr13	73899392	73948204	25	19366	56382.7	9899.07	47			KLF5	47	1
16_SCC104_H3K27ac_peak_15509_lociStitched	chr12	125388963	125425763	16	14397	50945.9	4699.36	48	UBC	SCARB1,DHX37	UBC	48	1
34_SCC104_H3K27ac_peak_51739_lociStitched	chr6	159125041	159195087	34	18785	55126.2	9358.15	49	EZR,SYTL3,MIR3918		MIR3918	49	1
7_SCC104_H3K27ac_peak_23442_lociStitched	chr17	17723485	17747151	7	13459	50216.9	4948.56	50	SREBF1,TOM1L2	MIR33B,SMCR5	SREBF1	50	1
28_SCC104_H3K27ac_peak_46142_lociStitched	chr5	52614397	52660871	28	24023	49490.2	4284.9	51			FST	51	1
16_SCC104_H3K27ac_peak_53102_lociStitched	chr7	46583114	46623277	16	17537	52432.8	7398.02	52			IGFBP3	52	1
8_SCC104_H3K27ac_peak_27848_lociStitched	chr19	12888221	12907436	8	14834	46905.7	2169.37	53	JUNB	ASNA1,HOOK2,RNASEH2A,PRDX2,RTBDN,C19orf43,MAST1,BEST2	JUNB	53	1
18_SCC104_H3K27ac_peak_24285_lociStitched	chr17	39927042	39957990	18	14536	47681.6	3967.53	54	JUP	FKBP10,HAP1,LEPREL4,JUP,NT5C3L,KLHL10	JUP	54	1
2_SCC104_H3K27ac_peak_62094_lociStitched	chrX	153596357	153604006	2	7556	45529.9	1877.06	55	FLNA	TAZ,DNASE1L1,RPL10,EMD,SNORA70	FLNA	55	1
28_SCC104_H3K27ac_peak_1325_lociStitched	chr1	27830316	27902878	28	18475	53608.8	10180.4	56	AHDC1	WASF2,FGR	WASF2	56	1
19_SCC104_H3K27ac_peak_39669_lociStitched	chr3	52063132	52096569	19	16077	46607.8	3721.54	57	DUSP7,C3orf74	RPL29,ACY1	DUSP7	57	1
29_SCC104_H3K27ac_peak_2797_lociStitched	chr1	68173083	68226607	29	17635	53186.8	10303.4	58	GNG12	GADD45A	GADD45A	58	1
15_SCC104_H3K27ac_peak_36966_lociStitched	chr21	40151632	40182303	15	15065	47126	4729.47	59	ETS2	NCRNA00114	ETS2	59	1
19_SCC104_H3K27ac_peak_4214_lociStitched	chr1	156066615	156100692	19	15647	47193.2	5261.49	60	LMNA	ROBLD3,RAB25,SEMA4A,UBQLN4,MEX3A	LMNA	60	1
26_SCC104_H3K27ac_peak_40306_lociStitched	chr3	111431625	111487422	26	19956	49943.9	8118.46	61	PLCXD2,PHLDB2	PLCXD2	PHLDB2	61	1
13_SCC104_H3K27ac_peak_32603_lociStitched	chr2	151315427	151353605	13	13568	46871.1	5356.37	62	RND3		RND3	62	1
20_SCC104_H3K27ac_peak_6911_lociStitched	chr10	11908267	11943991	20	14547	44294.2	3354.48	63	C10orf47		C10orf47	63	1
3_SCC104_H3K27ac_peak_13737_lociStitched	chr12	52909976	52920727	3	10017	42970.7	2080.32	64	KRT5	KRT6C,KRT6A,KRT71,KRT74	KRT5	64	1
9_SCC104_H3K27ac_peak_16470_lociStitched	chr13	80055402	80082208	9	15311	45310.2	5288.82	65	NDFIP2	NDFIP2	NDFIP2	65	1
30_SCC104_H3K27ac_peak_42985_lociStitched	chr4	15878111	15937504	30	17176	47692.6	7750.79	66	FGFBP1	FGFBP2	FGFBP1	66	1
17_SCC104_H3K27ac_peak_22179_lociStitched	chr16	70725601	70750518	17	15056	43819	4355.49	67	VAC14	LOC100130894,MTSS1L	MTSS1L	67	1
7_SCC104_H3K27ac_peak_35224_lociStitched	chr20	19954813	19975737	7	8234	45350.7	6277.2	68	RIN2	NAA20	NAA20	68	1
16_SCC104_H3K27ac_peak_1065_lociStitched	chr1	23880468	23921434	16	12635	44272	5460.77	69	ID3	E2F2,MDS2	ID3	69	1
5_SCC104_H3K27ac_peak_12062_lociStitched	chr11	119561360	119573663	5	11740	41598.9	2871.52	70	PVRL1		PVRL1	70	1
19_SCC104_H3K27ac_peak_30016_lociStitched	chr2	20405445	20436988	19	16557	41457	3296.24	71	SDC1		SDC1	71	1
29_SCC104_H3K27ac_peak_42003_lociStitched	chr3	188984227	189056236	29	15947	55288.5	17469.4	72	TPRG1		TPRG1	72	1
9_SCC104_H3K27ac_peak_2007_lociStitched	chr1	41958268	41982391	9	10272	43259.8	5536.23	73	HIVEP3	EDN2	EDN2	73	1
27_SCC104_H3K27ac_peak_58003_lociStitched	chr9	21549265	21592662	27	20358	42199.2	4778.01	74	LOC554202	MIR31	LOC554202	74	1
12_SCC104_H3K27ac_peak_14316_lociStitched	chr12	76033264	76057322	12	14272	40297.2	3199.71	75			KRR1	75	1
16_SCC104_H3K27ac_peak_4336_lociStitched	chr1	157978316	158007817	16	14148	41242.4	4165.54	76	KIRREL		KIRREL	76	1
16_SCC104_H3K27ac_peak_41217_lociStitched	chr3	151019128	151039854	16	13693	40826.1	3869.54	77	MED12L,GPR87	P2RY13,P2RY14,P2RY12	GPR87	77	1
20_SCC104_H3K27ac_peak_22668_lociStitched	chr16	87812128	87842486	20	13013	40564.4	3655.1	78		KLHDC4	KLHDC4	78	1
29_SCC104_H3K27ac_peak_33047_lociStitched	chr2	173060000	173127548	29	18687	44743.8	8369.2	79			DLX2	79	1
15_SCC104_H3K27ac_peak_27227_lociStitched	chr19	1154506	1194904	15	13394	39351.7	3336.87	80	SBNO2	SBNO2,ATP5D,STK11,C19orf26,GPX4	SBNO2	80	1
26_SCC104_H3K27ac_peak_37068_lociStitched	chr21	43050122	43107950	26	18462	44440.8	8500.72	81	NCRNA00111	NCRNA00112,C21orf129	NCRNA00111	81	1
12_SCC104_H3K27ac_peak_56774_lociStitched	chr8	102435621	102472754	12	10865	42565.6	6865.89	82		GRHL2	GRHL2	82	1
13_SCC104_H3K27ac_peak_17139_lociStitched	chr14	24721540	24755643	13	13881	40978.2	5309.84	83	RABGGTA,TGM1	LTB4R,TINF2,CHMP4A,ADCY4,GMPR2,C14orf21,NEDD8,LTB4R2,MDP1,DHRS1,CIDEB,TSSK4	RABGGTA	83	1
SCC104_H3K27ac_peak_48621	chr6	10408796	10420699	1	11904	37786.1	2183.01	84	LOC100130275,TFAP2A	C6orf218	TFAP2A	84	1
15_SCC104_H3K27ac_peak_35399_lociStitched	chr20	30147198	30162299	15	10256	39137.3	3723.91	85	HM13	HM13,PSIMCT-1,ID1,MIR3193	PSIMCT-1	85	1
15_SCC104_H3K27ac_peak_20002_lociStitched	chr15	75938762	75966482	15	14202	39983.3	4571.03	86	SNX33	ODF3L1,CSPG4,IMP3,SNUPN	SNX33	86	1
16_SCC104_H3K27ac_peak_45292_lociStitched	chr5	372245	425358	16	10442	55349.1	20305.1	87	LOC100310782,AHRR	LOC25845,EXOC3,C5orf55	LOC100310782	87	1
22_SCC104_H3K27ac_peak_25406_lociStitched	chr17	73675896	73704013	22	14224	39732.1	4748.96	88	SAP30BP	RECQL5,LOC643008,LOC100130933,ITGB4	SAP30BP	88	1
5_SCC104_H3K27ac_peak_31327_lociStitched	chr2	70308253	70323037	5	5582	37816	2931.67	89	LOC400960,PCBP1	LOC100133985	PCBP1	89	1
5_SCC104_H3K27ac_peak_25795_lociStitched	chr17	79479959	79486552	5	4855	36023.5	1213.77	90		FSCN2,C17orf70,ACTG1	ACTG1	90	1
23_SCC104_H3K27ac_peak_53276_lociStitched	chr7	55088580	55154872	23	12571	49288.1	14584.2	91	EGFR		EGFR	91	1
16_SCC104_H3K27ac_peak_1446_lociStitched	chr1	29563016	29607176	16	11637	42168.4	7476.29	92	PTPRU	MECR,PTPRU	PTPRU	92	1
11_SCC104_H3K27ac_peak_6282_lociStitched	chr1	230208522	230241603	11	9546	40501.1	5865.26	93	GALNT2		GALNT2	93	1
15_SCC104_H3K27ac_peak_24974_lociStitched	chr17	57904940	57930668	15	12273	37341.6	2719.45	94	MIR21,TMEM49	RPS6KB1,TUBD1	MIR21	94	1
8_SCC104_H3K27ac_peak_1787_lociStitched	chr1	37936849	37953005	8	9372	38003.8	3625.41	95	ZC3H12A	MEAF6	ZC3H12A	95	1
10_SCC104_H3K27ac_peak_30219_lociStitched	chr2	28593357	28633667	10	11964	40354.3	6002.16	96	FOSL2		FOSL2	96	1
20_SCC104_H3K27ac_peak_35435_lociStitched	chr20	30286618	30319189	20	11059	40831	6533.74	97	BCL2L1	TPX2	BCL2L1	97	1
18_SCC104_H3K27ac_peak_45557_lociStitched	chr5	14173103	14191720	18	10584	41638.8	7474.73	98	TRIO		TRIO	98	1
14_SCC104_H3K27ac_peak_2094_lociStitched	chr1	43472732	43500681	14	8925	38826.8	4846.36	99		FLJ32224,SLC2A1	SLC2A1	99	1
26_SCC104_H3K27ac_peak_5253_lociStitched	chr1	201228322	201288650	26	16337	43532.7	9586.12	100	PKP1	PKP1	PKP1	100	1
7_SCC104_H3K27ac_peak_16597_lociStitched	chr13	99222701	99238433	7	7831	37642	4024.25	101	STK24	STK24	STK24	101	1
20_SCC104_H3K27ac_peak_7771_lociStitched	chr10	74052321	74096930	20	14345	37676.8	4130.79	102	DNAJB12	DDIT4,DNAJB12	DNAJB12	102	1
18_SCC104_H3K27ac_peak_22046_lociStitched	chr16	68669645	68703691	18	14549	37532.3	4068.5	103	CDH3		CDH3	103	1
8_SCC104_H3K27ac_peak_4032_lociStitched	chr1	153534619	153547908	8	7272	35253.1	1872.42	104	S100A2	S100A5,S100A3,S100A14,S100A16,S100A4,S100A6	S100A2	104	1
14_SCC104_H3K27ac_peak_19743_lociStitched	chr15	68548688	68574832	14	11690	36491.8	3126.82	105	FEM1B	CLN6	FEM1B	105	1
8_SCC104_H3K27ac_peak_10826_lociStitched	chr11	66821623	66850063	8	9526	37688.7	4621.5	106	RHOD	SYT12,KDM2A	RHOD	106	1
30_SCC104_H3K27ac_peak_55982_lociStitched	chr8	48263413	48308608	30	13687	40811.1	7750.94	107	KIAA0146		KIAA0146	107	1
2_SCC104_H3K27ac_peak_49285_lociStitched	chr6	30649675	30656127	2	6388	34432.4	1891.73	108	KIAA1949,NRM	MDC1,TUBB,DHX16,C6orf136	KIAA1949	108	1
11_SCC104_H3K27ac_peak_28004_lociStitched	chr19	15923226	15950320	11	11448	34265.8	2075.4	109	UCA1	OR10H1,OR10H5,CYP4F24P	UCA1	109	1
19_SCC104_H3K27ac_peak_37002_lociStitched	chr21	40351274	40403084	19	12371	39852.3	7797.4	110			PSMG1	110	1
17_SCC104_H3K27ac_peak_61011_lociStitched	chrX	46167803	46193873	17	12966	34065.7	2189.88	111			ZNF673	111	1
7_SCC104_H3K27ac_peak_28786_lociStitched	chr19	42771967	42788484	7	10830	34646.1	3009.4	112		CIC,MEGF8,PAFAH1B3,PRR19,TMEM145,ZNF526,ERF,GSK3A	CIC	112	1
3_SCC104_H3K27ac_peak_60211_lociStitched	chr9	137215257	137222546	3	6532	33790.3	2500.13	113	RXRA		RXRA	113	1
10_SCC104_H3K27ac_peak_19877_lociStitched	chr15	72513198	72531184	10	10011	34150	3115.18	114	PKM2	GRAMD2,PKM2,PARP6	PKM2	114	1
11_SCC104_H3K27ac_peak_52927_lociStitched	chr7	43597581	43627373	11	10820	36560.7	5553.23	115	STK17A,HECW1		STK17A	115	1
11_SCC104_H3K27ac_peak_35827_lociStitched	chr20	42764071	42785245	11	9002	34863	3976.48	116	JPH2		JPH2	116	1
17_SCC104_H3K27ac_peak_15785_lociStitched	chr13	30140970	30169858	17	13234	35448.5	4633.64	117	SLC7A1		SLC7A1	117	1
21_SCC104_H3K27ac_peak_47563_lociStitched	chr5	148343955	148376918	21	15598	33978.3	3236.97	118	SH3TC2		SH3TC2	118	1
15_SCC104_H3K27ac_peak_8578_lociStitched	chr10	105609989	105650836	15	12987	34871.1	4239.92	119	OBFC1,SH3PXD2A		SH3PXD2A	119	1
11_SCC104_H3K27ac_peak_10370_lociStitched	chr11	62305463	62328063	11	10091	35486.5	4868.04	120	AHNAK,EEF1G	TUT1,MTA2	AHNAK	120	1
15_SCC104_H3K27ac_peak_34633_lociStitched	chr2	241373645	241392670	15	10389	33411.7	3142.93	121	PP14571,GPC1	MIR149	GPC1	121	1
1_SCC104_H3K27ac_peak_49452_lociStitched	chr6	32935677	32939718	1	4042	30973.5	909.225	122	BRD2	HLA-DMA,BRD2,HLA-DOA,HLA-DMB	BRD2	122	1
4_SCC104_H3K27ac_peak_43580_lociStitched	chr4	56410399	56420318	4	5209	33052.1	3103.66	123	CLOCK	PDCL2	CLOCK	123	1
SCC104_H3K27ac_peak_20819	chr16	3070018	3074324	1	4307	30736.7	996.839	124	HCFC1R1,THOC6,TNFRSF12A	IL32,CLDN9,LOC283875,CCDC64B,PKMYT1,MMP25,CLDN6,HCFC1R1	TNFRSF12A	124	1
4_SCC104_H3K27ac_peak_35829_lociStitched	chr20	42804211	42818843	4	5976	32803.5	3249.77	125	JPH2	C20orf111	JPH2	125	1
8_SCC104_H3K27ac_peak_60234_lociStitched	chr9	137297370	137307463	8	9183	32395.5	2973.4	126	RXRA		RXRA	126	1
17_SCC104_H3K27ac_peak_28342_lociStitched	chr19	35586574	35619308	17	13091	34017.2	4644.95	127	LOC100128675,FXYD3,LGI4	FXYD1,FXYD5,FXYD7	FXYD3	127	1
14_SCC104_H3K27ac_peak_18204_lociStitched	chr14	77488996	77519485	14	9779	33626.3	4396.51	128	C14orf4	KIAA1737	C14orf4	128	1
11_SCC104_H3K27ac_peak_59774_lociStitched	chr9	130297425	130346373	11	8873	40421.3	11238.5	129	FAM129B	STXBP1	FAM129B	129	1
5_SCC104_H3K27ac_peak_35141_lociStitched	chr20	17542102	17564124	5	4946	34081.2	5025.42	130	DSTN	BFSP1	DSTN	130	1
3_SCC104_H3K27ac_peak_41379_lociStitched	chr3	156532011	156537738	3	5310	30464.8	1530.25	131		PA2G4P4,LEKR1	PA2G4P4	131	1
18_SCC104_H3K27ac_peak_23511_lociStitched	chr17	18871321	18918395	18	11537	38633.6	9862	132	SLC5A10,FAM83G	GRAP	FAM83G	132	1
13_SCC104_H3K27ac_peak_792_lociStitched	chr1	19322932	19341596	13	8460	31331.3	2581.23	133		IFFO2	IFFO2	133	1
27_SCC104_H3K27ac_peak_8243_lociStitched	chr10	96988137	97040950	27	16495	32918.3	4209.2	134	C10orf129,PDLIM1		PDLIM1	134	1
8_SCC104_H3K27ac_peak_17029_lociStitched	chr14	23305763	23322860	8	8202	31349.1	2761.17	135	MMP14	SLC7A7,MRPL52,LRP10,REM2	MMP14	135	1
11_SCC104_H3K27ac_peak_54814_lociStitched	chr7	134859567	134879919	11	10058	31340	2788.22	136	WDR91	C7orf49,TMEM140,STRA8	C7orf49	136	1
18_SCC104_H3K27ac_peak_54163_lociStitched	chr7	101348014	101387338	18	10776	32760.8	4246.99	137			CUX1	137	1
12_SCC104_H3K27ac_peak_6063_lociStitched	chr1	223893635	223931079	12	8991	35452	7031.98	138	CAPN2	CAPN8	CAPN2	138	1
9_SCC104_H3K27ac_peak_12082_lociStitched	chr11	119991161	120006727	9	10846	31751.5	3460.32	139	TRIM29		TRIM29	139	1
17_SCC104_H3K27ac_peak_22692_lociStitched	chr16	87855471	87901096	17	12334	34606.6	6360.12	140	SLC7A5		SLC7A5	140	1
6_SCC104_H3K27ac_peak_10238_lociStitched	chr11	59031252	59038743	6	6120	29555	1494.45	141			MPEG1	141	1
24_SCC104_H3K27ac_peak_22559_lociStitched	chr16	85016043	85053060	24	13364	32719.3	4664.14	142	ZDHHC7	KIAA0513	ZDHHC7	142	1
17_SCC104_H3K27ac_peak_45850_lociStitched	chr5	36441813	36463346	17	9359	36569.5	8565.83	143			RANBP3L	143	1
5_SCC104_H3K27ac_peak_43501_lociStitched	chr4	53682225	53706157	5	5374	33349.2	5413.42	144		RASL11B	RASL11B	144	1
17_SCC104_H3K27ac_peak_16350_lociStitched	chr13	73967690	74008833	17	12480	35354.2	7471.57	145			KLF5	145	1
9_SCC104_H3K27ac_peak_56831_lociStitched	chr8	103799824	103823093	9	8633	32595.2	4849.26	146			AZIN1	146	1
11_SCC104_H3K27ac_peak_3918_lociStitched	chr1	151945185	151975389	11	8456	31705.1	4128.89	147	S100A10	S100A11	S100A10	147	1
8_SCC104_H3K27ac_peak_31931_lociStitched	chr2	106012441	106027708	8	8095	30532.5	2981.65	148	FHL2		FHL2	148	1
16_SCC104_H3K27ac_peak_53617_lociStitched	chr7	75920300	75948637	16	10838	31099.9	3553.46	149	HSPB1	YWHAG	HSPB1	149	1
5_SCC104_H3K27ac_peak_33932_lociStitched	chr2	219260389	219272281	5	6814	29372.1	1950.29	150	SLC11A1,CTDSP1,MIR26B	C2orf62,VIL1	MIR26B	150	1
13_SCC104_H3K27ac_peak_5293_lociStitched	chr1	201417110	201458865	13	8383	33145.1	5732.96	151	PHLDA3,CSRP1	CSRP1,RPS10P7,TNNI1,LAD1	PHLDA3	151	1
14_SCC104_H3K27ac_peak_13478_lociStitched	chr12	48145103	48177481	14	12063	32371.5	4992.69	152	RAPGEF3,SLC48A1,HDAC7	HDAC7,RPAP3,ENDOU	SLC48A1	152	1
5_SCC104_H3K27ac_peak_24226_lociStitched	chr17	39735001	39750111	5	10481	29142.7	1825.29	153	KRT14	KRT9,KRT17,KRT16,KRT42P	KRT14	153	1
12_SCC104_H3K27ac_peak_27000_lociStitched	chr18	61517004	61557688	12	12968	31351.1	4039.92	154	SERPINB2	SERPINB10	SERPINB2	154	1
15_SCC104_H3K27ac_peak_4943_lociStitched	chr1	183236678	183261930	15	10534	30966.5	3704.47	155	NMNAT2		NMNAT2	155	1
6_SCC104_H3K27ac_peak_59610_lociStitched	chr9	124952199	124976192	6	6109	31968.3	4726.62	156	MORN5,LHX6	NDUFA8,LHX6	LHX6	156	1
8_SCC104_H3K27ac_peak_59962_lociStitched	chr9	132088720	132109216	8	4629	31666.3	4535.76	157		C9orf106	C9orf106	157	1
26_SCC104_H3K27ac_peak_24129_lociStitched	chr17	38630824	38703747	26	12663	37650.1	10544.7	158	TNS4	CCR7,IGFBP4	TNS4	158	1
13_SCC104_H3K27ac_peak_21614_lociStitched	chr16	48983489	49006694	13	14009	30291.8	3209.25	159			CBLN1	159	1
5_SCC104_H3K27ac_peak_59944_lociStitched	chr9	131901199	131905776	5	3585	28713.8	1649.09	160	PPP2R4	CRAT,IER5L	PPP2R4	160	1
7_SCC104_H3K27ac_peak_34795_lociStitched	chr20	2332875	2347113	7	5839	30942	3905.48	161		TGM6	TGM6	161	1
31_SCC104_H3K27ac_peak_9658_lociStitched	chr11	16896289	16948047	31	16048	31292.9	4378.73	162	PLEKHA7		PLEKHA7	162	1
7_SCC104_H3K27ac_peak_15259_lociStitched	chr12	122221925	122240782	7	5719	29756.3	2870.04	163	LOC338799,RHOF	SETD1B	RHOF	163	1
5_SCC104_H3K27ac_peak_57632_lociStitched	chr8	144950525	144964313	5	7488	30423.2	3671.74	164		PUF60,NRBP2,EPPK1,PLEC	EPPK1	164	1
12_SCC104_H3K27ac_peak_3927_lociStitched	chr1	151995825	152025144	12	9412	31107.5	4374.39	165	S100A11	TCHHL1,S100A10	S100A11	165	1
12_SCC104_H3K27ac_peak_59590_lociStitched	chr9	124461070	124483436	12	5714	32544.8	5996.32	166	DAB2IP	DAB2IP	DAB2IP	166	1
2_SCC104_H3K27ac_peak_45430_lociStitched	chr5	6703871	6715136	2	4831	31095.9	4617.52	167	PAPD7	PAPD7	PAPD7	167	1
6_SCC104_H3K27ac_peak_52214_lociStitched	chr7	5633313	5648744	6	6228	30250.9	3873.18	168	FSCN1		FSCN1	168	1
5_SCC104_H3K27ac_peak_42320_lociStitched	chr3	194201597	194211129	5	5644	28733.3	2440.19	169	FLJ34208	ATP13A3	FLJ34208	169	1
9_SCC104_H3K27ac_peak_2208_lociStitched	chr1	44377726	44404739	9	10134	31718.7	5464.73	170	ST3GAL3,ARTN	B4GALT2,DPH2,ATP6V0B,IPO13,ARTN	ARTN	170	1
7_SCC104_H3K27ac_peak_5963_lociStitched	chr1	221906345	221932765	7	8689	31091.1	4845.43	171	DUSP10	DUSP10	DUSP10	171	1
4_SCC104_H3K27ac_peak_57691_lociStitched	chr8	145638549	145651866	4	5391	29374.6	3138.82	172	SLC39A4,VPS28	ADCK5,TONSL,MIR939,FOXH1,CYHR1,KIFC2,MIR1234,CPSF1	SLC39A4	172	1
6_SCC104_H3K27ac_peak_23322_lociStitched	chr17	15845332	15867738	6	6182	31847.9	5691.12	173	ADORA2B	TTC19,ZSWIM7	ADORA2B	173	1
12_SCC104_H3K27ac_peak_13119_lociStitched	chr12	28118803	28153236	12	11560	30449.1	4372.99	174	PTHLH		PTHLH	174	1
13_SCC104_H3K27ac_peak_30303_lociStitched	chr2	29330893	29353970	13	10920	28763.2	2780.78	175	CLIP4	C2orf71	CLIP4	175	1
16_SCC104_H3K27ac_peak_43943_lociStitched	chr4	79472154	79491295	16	10306	28102.8	2258.64	176	ANXA3		ANXA3	176	1
10_SCC104_H3K27ac_peak_21245_lociStitched	chr16	23131254	23161090	10	9108	29290	3484.84	177	USP31	SCNN1G	USP31	177	1
13_SCC104_H3K27ac_peak_52052_lociStitched	chr7	953512	989870	13	6808	34176.5	8471.41	178	ADAP1	GET4,CYP2W1,COX19	ADAP1	178	1
11_SCC104_H3K27ac_peak_14376_lociStitched	chr12	76411396	76430288	11	9586	28192.5	2518.3	179	PHLDA1	NAP1L1	PHLDA1	179	1
7_SCC104_H3K27ac_peak_16767_lociStitched	chr13	109798235	109810277	7	7356	28696.1	3030.97	180	MYO16		MYO16	180	1
9_SCC104_H3K27ac_peak_60319_lociStitched	chr9	139427966	139463503	9	7779	33817	8209.05	181	NOTCH1		NOTCH1	181	1
1_SCC104_H3K27ac_peak_4296_lociStitched	chr1	156715917	156721585	1	5669	26656	1060.48	182	HDGF	C1orf66,PRCC,ISG20L2,MRPL24,CRABP2	HDGF	182	1
20_SCC104_H3K27ac_peak_53301_lociStitched	chr7	55167794	55202416	20	10997	33465.6	7938.82	183	EGFR		EGFR	183	1
17_SCC104_H3K27ac_peak_18179_lociStitched	chr14	77379806	77429194	17	11470	32033.1	6563.67	184			C14orf4	184	1
6_SCC104_H3K27ac_peak_27243_lociStitched	chr19	1249875	1267187	6	10197	27567.6	2120.72	185	MIDN	CIRBP,C19orf23,ATP5D,STK11,C19orf26,EFNA2,C19orf24	MIDN	185	1
2_SCC104_H3K27ac_peak_59017_lociStitched	chr9	100745567	100748813	2	3046	26077.7	740.737	186	ANP32B	HEMGN	ANP32B	186	1
5_SCC104_H3K27ac_peak_51960_lociStitched	chr6	170531586	170538187	5	5786	26417.9	1105.01	187		LOC154449	LOC154449	187	1
8_SCC104_H3K27ac_peak_31402_lociStitched	chr2	72254776	72270434	8	9800	28449	3299.14	188			CYP26B1	188	1
13_SCC104_H3K27ac_peak_5378_lociStitched	chr1	202545084	202569402	13	10109	29077	3934.65	189	SYT2,PPP1R12B		PPP1R12B	189	1
14_SCC104_H3K27ac_peak_26659_lociStitched	chr18	46516653	46548289	14	9333	29801.1	4780.2	190		SMAD7	SMAD7	190	1
24_SCC104_H3K27ac_peak_5842_lociStitched	chr1	214592694	214651862	24	12774	32057.2	7165.24	191	PTPN14		PTPN14	191	1
11_SCC104_H3K27ac_peak_6007_lociStitched	chr1	222118842	222136635	11	10122	27159.2	2302.41	192			DUSP10	192	1
15_SCC104_H3K27ac_peak_31109_lociStitched	chr2	65057692	65103416	15	8513	33053.9	8202.89	193			LOC400958	193	1
7_SCC104_H3K27ac_peak_37316_lociStitched	chr21	46420811	46439236	7	9476	27676.2	2909.31	194	NCRNA00162	NCRNA00163	NCRNA00162	194	1
8_SCC104_H3K27ac_peak_25988_lociStitched	chr18	3602045	3627499	8	9601	28019.8	3293.75	195	DLGAP1	FLJ35776	FLJ35776	195	1
8_SCC104_H3K27ac_peak_40452_lociStitched	chr3	119810663	119833490	8	6936	28481.2	3759.61	196	GSK3B		GSK3B	196	1
6_SCC104_H3K27ac_peak_18787_lociStitched	chr14	105552944	105564506	6	6824	26129	1448.72	197		GPR132	GPR132	197	1
20_SCC104_H3K27ac_peak_40627_lociStitched	chr3	124825922	124868404	20	10702	32626.2	8071.58	198	SLC12A8		HEG1	198	1
3_SCC104_H3K27ac_peak_41292_lociStitched	chr3	152876778	152883794	3	5265	26618	2093.57	199	RAP2B		RAP2B	199	1
19_SCC104_H3K27ac_peak_47734_lociStitched	chr5	150949174	150978473	19	12722	27538.1	3035.38	200		FAT2	FAT2	200	1
2_SCC104_H3K27ac_peak_35151_lociStitched	chr20	17946628	17952608	2	4484	26593.7	2121.11	201	C20orf72,SNX5	SNORD17	SNX5	201	1
14_SCC104_H3K27ac_peak_25754_lociStitched	chr17	79054914	79093431	14	12226	30405.3	5962.43	202	BAIAP2,AATK	MIR1250,MIR657,FLJ90757,LOC388428,MIR3065,MIR338	MIR657	202	1
20_SCC104_H3K27ac_peak_3284_lociStitched	chr1	95163924	95207268	20	9515	31697.5	7294.8	203			SLC44A3	203	1
5_SCC104_H3K27ac_peak_28627_lociStitched	chr19	39888529	39901531	5	7713	26762	2414.47	204	ZFP36,MED29	PLEKHG2,SUPT5H,RPS16,PAF1	ZFP36	204	1
3_SCC104_H3K27ac_peak_1621_lociStitched	chr1	33222949	33228949	3	5578	25683	1485	205	KIAA1522	KIAA1522	KIAA1522	205	1
2_SCC104_H3K27ac_peak_10613_lociStitched	chr11	64948155	64952208	2	3990	25213.7	1085.39	206	CAPN1	SYVN1,CAPN1,SPDYC,SLC22A20	CAPN1	206	1
17_SCC104_H3K27ac_peak_47748_lociStitched	chr5	150992947	151031509	17	13638	27479.3	3497.57	207		FAT2,SPARC	SPARC	207	1
6_SCC104_H3K27ac_peak_37934_lociStitched	chr22	36714162	36731246	6	7770	26213.7	2284.13	208	MYH9		MYH9	208	1
13_SCC104_H3K27ac_peak_51759_lociStitched	chr6	159268697	159292073	13	8987	26641.6	2756.03	209	OSTCL	EZR,C6orf99	OSTCL	209	1
9_SCC104_H3K27ac_peak_42478_lociStitched	chr3	197093719	197122876	9	7253	30708.2	6962.69	210			DLG1	210	1
2_SCC104_H3K27ac_peak_35282_lociStitched	chr20	22742387	22757094	2	3588	27966.8	4315.03	211			FOXA2	211	1
7_SCC104_H3K27ac_peak_23976_lociStitched	chr17	36603882	36622367	7	9055	26524.1	2959.45	212	ARHGAP23		ARHGAP23	212	1
9_SCC104_H3K27ac_peak_1523_lociStitched	chr1	31886035	31908525	9	6205	27921.3	4419.28	213	SERINC2	FABP3	SERINC2	213	1
28_SCC104_H3K27ac_peak_8207_lociStitched	chr10	95185130	95236764	28	13144	27154.3	3764.12	214	MYOF	CEP55,MYOF	MYOF	214	1
1_SCC104_H3K27ac_peak_233_lociStitched	chr1	6548116	6551709	1	3594	24090.7	763.153	215	PLEKHG5	PLEKHG5,TNFRSF25	PLEKHG5	215	1
26_SCC104_H3K27ac_peak_30926_lociStitched	chr2	56065545	56129433	26	12984	32122.9	8867.65	216	EFEMP1	EFEMP1	EFEMP1	216	1
3_SCC104_H3K27ac_peak_25539_lociStitched	chr17	75280967	75288596	3	5137	24189.3	993.296	217	2021-09-09	2021-09-09	2021-09-09	217	1
4_SCC104_H3K27ac_peak_56789_lociStitched	chr8	102503501	102517377	4	5509	25882.9	2766.87	218	GRHL2		GRHL2	218	1
15_SCC104_H3K27ac_peak_47357_lociStitched	chr5	139015735	139051603	15	11142	27187.9	4135.58	219	CXXC5		CXXC5	219	1
23_SCC104_H3K27ac_peak_34499_lociStitched	chr2	237620625	237685704	23	10739	31140.3	8134.88	220			CXCR7	220	1
23_SCC104_H3K27ac_peak_55694_lociStitched	chr8	32081437	32130514	23	13527	25981.4	3121.3	221	NRG1		NRG1	221	1
14_SCC104_H3K27ac_peak_11137_lociStitched	chr11	72896044	72910125	14	8524	26006.2	3334.38	222		P2RY2,FCHSD2	P2RY2	222	1
14_SCC104_H3K27ac_peak_3154_lociStitched	chr1	93787332	93817995	14	10556	26885.3	4219.23	223	DR1,LOC100131564		LOC100131564	223	1
12_SCC104_H3K27ac_peak_5152_lociStitched	chr1	198411527	198434698	12	10760	25147.5	2500.15	224			ATP6V1G3	224	1
16_SCC104_H3K27ac_peak_50255_lociStitched	chr6	56503206	56535019	16	10889	27012.4	4552.44	225	DST		DST	225	1
1_SCC104_H3K27ac_peak_57597_lociStitched	chr8	144653383	144657908	1	4526	23752.6	1352.97	226	C8orf73,NAPRT1	GSDMD,EEF1D,PYCRL,TSTA3,TIGD5,ZC3H3	C8orf73	226	1
17_SCC104_H3K27ac_peak_14941_lociStitched	chr12	109224539	109248784	17	10296	25161.5	2819.69	227	SSH1	DAO,SSH1	SSH1	227	1
5_SCC104_H3K27ac_peak_16295_lociStitched	chr13	73629602	73637800	5	6527	24349.7	2029.82	228	KLF5		KLF5	228	1
12_SCC104_H3K27ac_peak_34358_lociStitched	chr2	234388373	234402596	12	11038	24453.6	2201.72	229	USP40		USP40	229	1
10_SCC104_H3K27ac_peak_607_lociStitched	chr1	16143019	16163141	10	6016	23989.4	1778.78	230	FLJ37453	SPEN,UQCRHL	UQCRHL	230	1
3_SCC104_H3K27ac_peak_45875_lociStitched	chr5	36870349	36887581	3	3514	28467.3	6275.89	231	NIPBL	NIPBL	NIPBL	231	1
16_SCC104_H3K27ac_peak_20927_lociStitched	chr16	4963374	4996473	16	10020	26780.4	4666.96	232	PPL	SEC14L5	PPL	232	1
1_SCC104_H3K27ac_peak_25301_lociStitched	chr17	72753171	72758214	1	5044	23041.5	954.136	233	SLC9A3R1	CD300LF,NAT9,RAB37,TMEM104,MIR3615	SLC9A3R1	233	1
4_SCC104_H3K27ac_peak_52142_lociStitched	chr7	2561766	2570934	4	4640	25688.7	3609.44	234	LFNG	C7orf27,IQCE	LFNG	234	1
12_SCC104_H3K27ac_peak_20379_lociStitched	chr15	93344280	93375950	12	7996	25212.5	3160.67	235		ASB9P1	ASB9P1	235	1
9_SCC104_H3K27ac_peak_6395_lociStitched	chr1	234724512	234749351	9	8202	26957.8	4937.99	236	IRF2BP2	NCRNA00184	IRF2BP2	236	1
21_SCC104_H3K27ac_peak_41366_lociStitched	chr3	156468124	156507344	21	9005	31121.1	9122.57	237		PA2G4P4,LEKR1	PA2G4P4	237	1
12_SCC104_H3K27ac_peak_38524_lociStitched	chr22	46832103	46859567	12	7197	24541.8	2559.64	238	CELSR1		CELSR1	238	1
9_SCC104_H3K27ac_peak_22928_lociStitched	chr17	2295316	2311357	9	9766	23843.3	1873.59	239	MNT,LOC284009		MNT	239	1
15_SCC104_H3K27ac_peak_13745_lociStitched	chr12	53253720	53274337	15	9251	24855.9	2944.11	240		KRT8,KRT79,KRT78,KRT4	KRT78	240	1
3_SCC104_H3K27ac_peak_29143_lociStitched	chr19	47613770	47626103	3	4202	23229.2	1356.63	241	ZC3H4	SAE1	ZC3H4	241	1
10_SCC104_H3K27ac_peak_35626_lociStitched	chr20	34670069	34685880	10	7990	24712.6	3042.04	242		LOC647979,EPB41L1	EPB41L1	242	1
9_SCC104_H3K27ac_peak_33417_lociStitched	chr2	192030178	192039357	9	6963	22752	1219.89	243		STAT4	STAT4	243	1
12_SCC104_H3K27ac_peak_36981_lociStitched	chr21	40274222	40298427	12	10814	25173.2	3727.57	244			ETS2	244	1
10_SCC104_H3K27ac_peak_35899_lociStitched	chr20	43964466	43974643	10	8194	24281.3	2904.52	245	SDC4	SYS1,SYS1-DBNDD2,RBPJL,MATN4,TP53TG5	SDC4	245	1
12_SCC104_H3K27ac_peak_29199_lociStitched	chr19	48221553	48247339	12	7393	24393.6	3084.01	246	EHD2	GLTSCR2,SNORD23,SEPW1	GLTSCR2	246	1
8_SCC104_H3K27ac_peak_34726_lociStitched	chr20	821523	841577	8	6702	27835	6543.62	247	FAM110A		FAM110A	247	1
9_SCC104_H3K27ac_peak_10745_lociStitched	chr11	66079518	66107689	9	6371	26303.3	5067.96	248	CD248,BRMS1,RIN1	BRMS1,RAB1B,B3GNT1,SLC29A2,TMEM151A,YIF1A,CNIH2	CD248	248	1
6_SCC104_H3K27ac_peak_52204_lociStitched	chr7	5588747	5603301	6	5418	25169.7	4003.81	249		ACTB,FSCN1,FBXL18	ACTB	249	1
17_SCC104_H3K27ac_peak_323_lociStitched	chr1	8932134	8972274	17	9931	25079.5	4009.99	250	ENO1	CA6	ENO1	250	1
10_SCC104_H3K27ac_peak_20560_lociStitched	chr15	101245281	101273431	10	8088	23429.2	2440.61	251			ASB7	251	1
14_SCC104_H3K27ac_peak_18069_lociStitched	chr14	74206478	74224457	14	9464	23811.4	2873.04	252	C14orf43	PNMA1	C14orf43	252	1
2_SCC104_H3K27ac_peak_10945_lociStitched	chr11	68775289	68779346	2	3967	21903.7	1056.04	253	MRGPRF	TPCN2,MRGPRD	MRGPRF	253	1
15_SCC104_H3K27ac_peak_32313_lociStitched	chr2	128144224	128181132	15	8840	25695.3	4930.91	254	PROC	MAP3K2	PROC	254	1
9_SCC104_H3K27ac_peak_1539_lociStitched	chr1	32014440	32055249	9	8379	27231.8	6631.46	255	TINAGL1	HCRTR1,LOC149086,LOC284551	TINAGL1	255	1
7_SCC104_H3K27ac_peak_36478_lociStitched	chr20	62313093	62331572	7	8096	25122.2	4534.75	256	RTEL1,TNFRSF6B,ARFRP1	ZGPAT,LIME1,SLC2A4RG,ARFRP1,STMN3	TNFRSF6B	256	1
10_SCC104_H3K27ac_peak_25493_lociStitched	chr17	74575752	74598513	10	7546	23270.8	2692.63	257	ST6GALNAC2	SNORD1A,CYGB,SNORD1B,ST6GALNAC1,PRCD,SNORD1C	ST6GALNAC2	257	1
17_SCC104_H3K27ac_peak_40170_lociStitched	chr3	105085788	105122643	17	9760	24936.1	4555.28	258	ALCAM		ALCAM	258	1
14_SCC104_H3K27ac_peak_41192_lociStitched	chr3	150442627	150469964	14	7905	26156	5792.71	259	SIAH2	FAM194A	SIAH2	259	1
7_SCC104_H3K27ac_peak_43107_lociStitched	chr4	30718388	30728344	7	8773	22053.5	1730.35	260	PCDH7		PCDH7	260	1
9_SCC104_H3K27ac_peak_37518_lociStitched	chr22	20858318	20888286	9	7538	22823.6	2613.21	261	MED15	KLHL22	MED15	261	1
4_SCC104_H3K27ac_peak_45239_lociStitched	chr4	187644122	187658144	4	7924	21443.8	1276	262	FAT1		FAT1	262	1
12_SCC104_H3K27ac_peak_38000_lociStitched	chr22	37904555	37942801	12	8285	23639.9	3495.68	263	CARD10	LGALS2,MFNG,CDC42EP1	CARD10	263	1
3_SCC104_H3K27ac_peak_60428_lociStitched	chr9	140505375	140508534	3	3047	21179.5	1057.63	264	ARRDC1	C9orf37,ZMYND19,EHMT1,WDR85	C9orf37	264	1
14_SCC104_H3K27ac_peak_30342_lociStitched	chr2	31601102	31625459	14	9039	24775.9	4727.69	265	XDH		XDH	265	1
2_SCC104_H3K27ac_peak_17971_lociStitched	chr14	69441990	69447357	2	5095	20834.7	866.234	266	ACTN1		ACTN1	266	1
5_SCC104_H3K27ac_peak_59042_lociStitched	chr9	101008794	101017914	5	7264	22007.5	2120.4	267	TBC1D2		TBC1D2	267	1
16_SCC104_H3K27ac_peak_25279_lociStitched	chr17	71301074	71339491	16	10353	24832.7	4959.63	268	CDC42EP4,SDK2	CPSF4L	CDC42EP4	268	1
19_SCC104_H3K27ac_peak_43130_lociStitched	chr4	30936429	30956990	19	13860	21874.8	2054.04	269	PCDH7		PCDH7	269	1
7_SCC104_H3K27ac_peak_45929_lociStitched	chr5	39193648	39199933	7	5100	22388.4	2596.96	270	FYB	FYB	FYB	270	1
3_SCC104_H3K27ac_peak_34802_lociStitched	chr20	2363805	2369667	3	4602	21780.8	2032.94	271	TGM6		TGM6	271	1
16_SCC104_H3K27ac_peak_12714_lociStitched	chr12	10049302	10065041	16	10002	21790.6	2050.79	272		CLEC2A,CLEC2B,KLRF2	KLRF2	272	1
8_SCC104_H3K27ac_peak_61787_lociStitched	chrX	129239309	129260228	8	8232	21569.6	1891.08	273	ELF4	AIFM1,RAB33A	ELF4	273	1
8_SCC104_H3K27ac_peak_10549_lociStitched	chr11	64306614	64314267	8	5692	21443.7	1790.04	274		SLC22A11,SLC22A12	SLC22A11	274	1
11_SCC104_H3K27ac_peak_32695_lociStitched	chr2	158091744	158119239	11	8309	22609.1	3018.95	275	GALNT5		GALNT5	275	1
3_SCC104_H3K27ac_peak_10848_lociStitched	chr11	67077298	67082007	3	4300	20761.5	1184.31	276	SSH3	ADRBK1,ANKRD13D,POLD4,LOC100130987	LOC100130987	276	1
15_SCC104_H3K27ac_peak_37943_lociStitched	chr22	36761364	36813389	15	7024	23083.5	3511.69	277	MYH9		MYH9	277	1
11_SCC104_H3K27ac_peak_12724_lociStitched	chr12	10513610	10548742	11	8670	22530.2	2961.63	278	KLRK1	KLRC4,KLRC3,KLRC2	KLRK1	278	1
7_SCC104_H3K27ac_peak_60269_lociStitched	chr9	138017954	138045480	7	5641	26703	7165.02	279			OLFM1	279	1
14_SCC104_H3K27ac_peak_24356_lociStitched	chr17	40670195	40707320	14	9327	23763.7	4239.68	280	NAGLU,ATP6V0A1,HSD17B1	MLX,COASY,PSMC3IP	NAGLU	280	1
11_SCC104_H3K27ac_peak_34380_lociStitched	chr2	234604268	234617953	11	9043	21084.5	1649.04	281	UGT1A10,UGT1A6,UGT1A8,UGT1A7,UGT1A9	UGT1A5,UGT1A3,UGT1A4,DNAJB3	UGT1A6	281	1
11_SCC104_H3K27ac_peak_10505_lociStitched	chr11	64030784	64046191	11	6947	22215.4	2821.02	282	BAD,PLCB3	PRDX5,GPR137,TRMT112,PLCB3,ESRRA,FKBP2,C11orf20,NUDT22,KCNK4,VEGFB,TRPT1,DNAJC4,PPP1R14B	GPR137	282	1
11_SCC104_H3K27ac_peak_33919_lociStitched	chr2	219146516	219163661	11	10125	21880.4	2506.6	283	TMBIM1,PNKD	AAMP,GPBAR1,PNKD	TMBIM1	283	1
8_SCC104_H3K27ac_peak_43593_lociStitched	chr4	56593632	56603316	8	6680	22215.1	2917.79	284			LOC644145	284	1
7_SCC104_H3K27ac_peak_15189_lociStitched	chr12	120666404	120680409	7	8215	21429.1	2208.59	285	PXN	GCN1L1,RPLP0	PXN	285	1
7_SCC104_H3K27ac_peak_57329_lociStitched	chr8	128863440	128880570	7	6874	22407.8	3241	286	PVT1		MIR1204	286	1
10_SCC104_H3K27ac_peak_38901_lociStitched	chr3	13878029	13900306	10	6978	21546.3	2390.32	287	WNT7A		WNT7A	287	1
14_SCC104_H3K27ac_peak_32021_lociStitched	chr2	110451665	110480193	14	7778	23575.5	4447.52	288			RGPD6	288	1
7_SCC104_H3K27ac_peak_5220_lociStitched	chr1	200626280	200644959	7	7462	21241.8	2133.14	289	DDX59	KIF14	DDX59	289	1
15_SCC104_H3K27ac_peak_6455_lociStitched	chr1	236066145	236107377	15	7297	26260.7	7174.37	290		MIR1537,LYST	LYST	290	1
4_SCC104_H3K27ac_peak_2998_lociStitched	chr1	86037900	86050440	4	5862	21519.9	2543.11	291	CYR61,DDAH1		DDAH1	291	1
14_SCC104_H3K27ac_peak_3080_lociStitched	chr1	90308339	90356904	14	7783	26084.3	7134.2	292	LRRC8D		LRRC8D	292	1
18_SCC104_H3K27ac_peak_46244_lociStitched	chr5	55811621	55841257	18	9241	21752.8	2842.09	293			MAP3K1	293	1
5_SCC104_H3K27ac_peak_10904_lociStitched	chr11	67779454	67795481	5	4415	21947.4	3067.57	294	ALDH3B1	TCIRG1,NDUFS8,UNC93B1	ALDH3B1	294	1
8_SCC104_H3K27ac_peak_34867_lociStitched	chr20	3779119	3793271	8	5800	23683.4	4811.68	295	CDC25B	CDC25B,C20orf29,C20orf27,SPEF1,MAVS,CENPB	CDC25B	295	1
3_SCC104_H3K27ac_peak_36898_lociStitched	chr21	38737216	38743052	3	4842	19649.8	780.273	296	DYRK1A	DYRK1A	DYRK1A	296	1
7_SCC104_H3K27ac_peak_45493_lociStitched	chr5	10550725	10572605	7	4916	28356.5	9493.73	297	ANKRD33B		ANKRD33B	297	1
15_SCC104_H3K27ac_peak_13440_lociStitched	chr12	47659402	47675806	15	8050	21203.8	2427.79	298		LOC100233209,FAM113B	LOC100233209	298	1
5_SCC104_H3K27ac_peak_57551_lociStitched	chr8	143812877	143821194	5	5166	20519.7	1761.54	299	C8orf55	LYPD2,LY6D,SLURP1,LYNX1,LY6K	SLURP1	299	1
1_SCC104_H3K27ac_peak_54231_lociStitched	chr7	104651655	104656144	1	4490	19459.4	808.469	300	MLL5,LOC100216545		LOC100216545	300	1
21_SCC104_H3K27ac_peak_47222_lociStitched	chr5	134441880	134494049	21	10914	24039.5	5394.27	301			PITX1	301	1
18_SCC104_H3K27ac_peak_37216_lociStitched	chr21	44913657	44943523	18	10252	23134.2	4536.65	302		C21orf125,C21orf84	C21orf84	302	1
15_SCC104_H3K27ac_peak_38532_lociStitched	chr22	46909972	46959678	15	10785	23128.2	4533.19	303	CELSR1		CELSR1	303	1
17_SCC104_H3K27ac_peak_1911_lociStitched	chr1	40425727	40481528	17	8300	26170.7	7588.94	304	MFSD2A	CAP1	MFSD2A	304	1
25_SCC104_H3K27ac_peak_34253_lociStitched	chr2	231637842	231661809	25	11020	21071.8	2521.33	305	CAB39		CAB39	305	1
5_SCC104_H3K27ac_peak_41594_lociStitched	chr3	171509755	171530836	5	4695	23359.9	4840.2	306	PLD1	TMEM212	PLD1	306	1
12_SCC104_H3K27ac_peak_2757_lociStitched	chr1	68018545	68042464	12	8246	22861.8	4391.53	307			GADD45A	307	1
9_SCC104_H3K27ac_peak_42582_lociStitched	chr4	1317076	1338750	9	7791	21452.9	3008.35	308	MAEA	KIAA1530,CRIPAK	KIAA1530	308	1
10_SCC104_H3K27ac_peak_59619_lociStitched	chr9	125122481	125147109	10	7492	24573.8	6181.63	309	PTGS1	PTGS1	PTGS1	309	1
7_SCC104_H3K27ac_peak_24641_lociStitched	chr17	46122526	46145977	7	6727	21652.3	3266.72	310	NFE2L1	COPZ2,CBX1,SNX11,MIR152	NFE2L1	310	1
9_SCC104_H3K27ac_peak_4922_lociStitched	chr1	183118103	183135887	9	7081	20156.4	1895.77	311		LAMC2	LAMC2	311	1
13_SCC104_H3K27ac_peak_15468_lociStitched	chr12	125093160	125124620	13	8312	22644.9	4394.96	312		NCOR2	NCOR2	312	1
15_SCC104_H3K27ac_peak_54617_lociStitched	chr7	128508236	128543063	15	7781	22348.5	4147.9	313	KCP,LOC100130705	FLNC,IRF5,ATP6V1F	LOC100130705	313	1
9_SCC104_H3K27ac_peak_34296_lociStitched	chr2	232526462	232546619	9	5504	20969.3	2769.57	314		PTMA,MIR1244-2	PTMA	314	1
8_SCC104_H3K27ac_peak_7965_lociStitched	chr10	80907647	80923623	8	8196	20224	2059.31	315	ZMIZ1		ZMIZ1	315	1
12_SCC104_H3K27ac_peak_21332_lociStitched	chr16	27327712	27339248	12	7221	20627.5	2480.24	316	IL4R	FLJ21408,NSMCE1	IL4R	316	1
9_SCC104_H3K27ac_peak_23418_lociStitched	chr17	17589108	17615000	9	5729	22334.4	4264.41	317	RAI1		RAI1	317	1
4_SCC104_H3K27ac_peak_17095_lociStitched	chr14	23767077	23778982	4	6672	19969.4	1907.18	318	PPP1R3E,BCL2L2	SLC22A17,PABPN1,HOMEZ	PPP1R3E	318	1
6_SCC104_H3K27ac_peak_55406_lociStitched	chr8	21958841	21976075	6	6811	19745	1714.78	319	HR,NUDT18,FAM160B2	EPB49,HR,SFTPC,REEP4,BMP1,LGI3	NUDT18	319	1
8_SCC104_H3K27ac_peak_31475_lociStitched	chr2	74208281	74237871	8	5126	23680.9	5672.4	320		TET3	TET3	320	1
3_SCC104_H3K27ac_peak_57620_lociStitched	chr8	144819056	144822891	3	3039	19470.3	1490.28	321	LOC100128338	BREA2,MAPK15,FAM83H,LOC100130274	LOC100128338	321	1
16_SCC104_H3K27ac_peak_13372_lociStitched	chr12	46940476	46956680	16	10459	20086.5	2176.2	322			SLC38A2	322	1
8_SCC104_H3K27ac_peak_11075_lociStitched	chr11	71849462	71858651	8	7342	19005.6	1135.76	323	FOLR3	C11orf59,FOLR1,C11orf51	FOLR3	323	1
13_SCC104_H3K27ac_peak_14539_lociStitched	chr12	89315326	89338529	13	7877	20323.5	2466.48	324			KITLG	324	1
8_SCC104_H3K27ac_peak_53211_lociStitched	chr7	48121714	48135409	8	6656	21157.4	3305.97	325	UPP1	C7orf57	UPP1	325	1
3_SCC104_H3K27ac_peak_10208_lociStitched	chr11	57667532	57674112	3	5660	19172.8	1331.13	326			OR9Q1	326	1
11_SCC104_H3K27ac_peak_12181_lociStitched	chr11	124939362	124962530	11	8746	21587.9	3848.2	327	SLC37A2	TMEM218	SLC37A2	327	1
9_SCC104_H3K27ac_peak_45591_lociStitched	chr5	14675504	14703956	9	5715	28543	10860.1	328	FAM105B		FAM105B	328	1
6_SCC104_H3K27ac_peak_1168_lociStitched	chr1	26200733	26220549	6	7425	20077.6	2415.57	329	STMN1	PAQR7,C1orf135,STMN1,MIR3917	PAQR7	329	1
16_SCC104_H3K27ac_peak_40466_lociStitched	chr3	119854540	119896968	16	8426	23844.5	6296.32	330	GPR156	GSK3B	GSK3B	330	1
SCC104_H3K27ac_peak_24207	chr17	39676045	39679699	1	3655	18358.4	917.885	331		KRT35,KRT19,KRT36,KRT15,KRT9,KRT13	KRT15	331	1
3_SCC104_H3K27ac_peak_42455_lociStitched	chr3	196723422	196731231	3	3247	19747.4	2383.31	332	MFI2	PIGZ,MFI2	MFI2	332	1
10_SCC104_H3K27ac_peak_32622_lociStitched	chr2	151375242	151392153	10	7955	19346.2	2053	333		RND3	RND3	333	1
5_SCC104_H3K27ac_peak_33907_lociStitched	chr2	219081871	219095606	5	5156	18707.1	1438.05	334	ARPC2	GPBAR1,AAMP,PNKD	ARPC2	334	1
5_SCC104_H3K27ac_peak_59948_lociStitched	chr9	131928978	131938291	5	4550	19541.5	2281.68	335	IER5L		IER5L	335	1
8_SCC104_H3K27ac_peak_32035_lociStitched	chr2	110854808	110873389	8	6475	19768.3	2547.46	336	MALL	MIR4267	MALL	336	1
17_SCC104_H3K27ac_peak_9501_lociStitched	chr11	12085543	12113341	17	9366	19580.9	2390.63	337		MICAL2	MICAL2	337	1
11_SCC104_H3K27ac_peak_602_lociStitched	chr1	16111391	16127806	11	7947	19223.6	2051.88	338	FBLIM1	UQCRHL,FBLIM1,TMEM82,SPEN,SLC25A34,FLJ37453	UQCRHL	338	1
7_SCC104_H3K27ac_peak_33976_lociStitched	chr2	220135154	220155307	7	7886	19788.2	2636.01	339	TUBA4B,DNAJB2,PTPRN	ANKZF1,GLB1L,STK16,ATG9A,MIR153-1,RESP18,TUBA4A	DNAJB2	339	1
16_SCC104_H3K27ac_peak_33678_lociStitched	chr2	206599229	206641330	16	8735	22982.9	5839.41	340	NRP2		NRP2	340	1
12_SCC104_H3K27ac_peak_43421_lociStitched	chr4	48331237	48348678	12	8334	19451.9	2319.65	341	SLAIN2		SLAIN2	341	1
9_SCC104_H3K27ac_peak_30840_lociStitched	chr2	54784295	54803926	9	8214	20734.3	3602.29	342	SPTBN1	RPL23AP32	SPTBN1	342	1
14_SCC104_H3K27ac_peak_52259_lociStitched	chr7	6416564	6445255	14	6894	23477.8	6360.79	343	RAC1	C7orf70,DAGLB	RAC1	343	1
20_SCC104_H3K27ac_peak_61007_lociStitched	chrX	46115260	46139942	20	10248	19054.5	1999.24	344			ZNF673	344	1
12_SCC104_H3K27ac_peak_6365_lociStitched	chr1	234444945	234458610	12	8193	19751.4	2697.47	345	SLC35F3		C1orf31	345	1
5_SCC104_H3K27ac_peak_17952_lociStitched	chr14	69253089	69263305	5	6789	18723.9	1726.5	346	C14orf181,ZFP36L1		ZFP36L1	346	1
8_SCC104_H3K27ac_peak_30589_lociStitched	chr2	43300357	43315129	8	7514	20153.4	3156.78	347			ZFP36L2	347	1
12_SCC104_H3K27ac_peak_10164_lociStitched	chr11	57060802	57090142	12	8446	22418.7	5439.64	348	TNKS1BP1	P2RX3,SSRP1	TNKS1BP1	348	1
13_SCC104_H3K27ac_peak_52005_lociStitched	chr7	510920	536849	13	5593	23888.4	6951.56	349		PDGFA,FLJ44511	PDGFA	349	1
17_SCC104_H3K27ac_peak_56918_lociStitched	chr8	110597549	110651414	17	8371	26744	9824.98	350	SYBU	SYBU,EBAG9	SYBU	350	1
21_SCC104_H3K27ac_peak_1873_lociStitched	chr1	39633604	39682361	21	9311	23427.7	6591.95	351	MACF1		MACF1	351	1
5_SCC104_H3K27ac_peak_25824_lociStitched	chr17	79779889	79800968	5	5528	19563.4	2731.84	352	FAM195B,DYSFIP1	P4HB,ARHGDIA,THOC4,GCGR,ANAPC11,FAM195B	FAM195B	352	1
14_SCC104_H3K27ac_peak_51580_lociStitched	chr6	150571702	150594480	14	9002	19978.6	3159.31	353			IYD	353	1
20_SCC104_H3K27ac_peak_15277_lociStitched	chr12	122349308	122390627	20	8906	21246.2	4441.79	354	PSMD9,WDR66	HPD	WDR66	354	1
9_SCC104_H3K27ac_peak_13347_lociStitched	chr12	46750727	46780924	9	6630	20488.7	3693.09	355	SLC38A2		SLC38A2	355	1
14_SCC104_H3K27ac_peak_54271_lociStitched	chr7	105698569	105713191	14	9151	19121.2	2327.82	356		SYPL1	SYPL1	356	1
10_SCC104_H3K27ac_peak_11482_lociStitched	chr11	94463331	94484000	10	6625	20617.3	3848.57	357		AMOTL1	AMOTL1	357	1
7_SCC104_H3K27ac_peak_43273_lociStitched	chr4	38665654	38677299	7	7021	18462	1754.9	358	FLJ13197,KLF3		FLJ13197	358	1
5_SCC104_H3K27ac_peak_1223_lociStitched	chr1	27018505	27029232	5	6309	18304.6	1599.4	359	ARID1A		ARID1A	359	1
2_SCC104_H3K27ac_peak_52120_lociStitched	chr7	1978078	1980894	2	2727	17551	860.006	360	MAD1L1		ELFN1	360	1
14_SCC104_H3K27ac_peak_5985_lociStitched	chr1	222000145	222022300	14	6531	20878.9	4211.67	361			DUSP10	361	1
9_SCC104_H3K27ac_peak_23961_lociStitched	chr17	35826398	35852462	9	7718	19568.9	2950.44	362	TADA2A,DUSP14		DUSP14	362	1
5_SCC104_H3K27ac_peak_6115_lociStitched	chr1	225837461	225846120	5	6019	18209.9	1641.75	363	ENAH		ENAH	363	1
10_SCC104_H3K27ac_peak_34018_lociStitched	chr2	220549030	220568523	10	6402	19085.6	2526.29	364			SLC4A3	364	1
14_SCC104_H3K27ac_peak_41781_lociStitched	chr3	182345761	182368878	14	7290	21866.4	5323.85	365			ATP11B	365	1
10_SCC104_H3K27ac_peak_36114_lociStitched	chr20	49039274	49058099	10	6117	19436.8	2998.82	366			PTPN1	366	1
5_SCC104_H3K27ac_peak_12564_lociStitched	chr12	6444356	6455143	5	5427	18296.9	1868.31	367	TNFRSF1A	PLEKHG6,SCNN1A,LTBR	TNFRSF1A	367	1
6_SCC104_H3K27ac_peak_2129_lociStitched	chr1	43663466	43673737	6	5438	18205.3	1796.4	368	WDR65	FAM183A,EBNA1BP2	EBNA1BP2	368	1
11_SCC104_H3K27ac_peak_60969_lociStitched	chrX	46024535	46046971	11	7451	17466.4	1070.2	369			ZNF673	369	1
10_SCC104_H3K27ac_peak_9201_lociStitched	chr11	2187142	2207203	10	7009	17972.6	1795.46	370	TH	IGF2,INS,TH,IGF2AS,MIR483	TH	370	1
16_SCC104_H3K27ac_peak_49987_lociStitched	chr6	44001890	44052935	16	7802	23853.3	7682.27	371		C6orf223,TMEM63B,MRPL14	C6orf223	371	1
6_SCC104_H3K27ac_peak_45544_lociStitched	chr5	14032828	14039003	6	3667	19373.4	3204.21	372			DNAH5	372	1
2_SCC104_H3K27ac_peak_22278_lociStitched	chr16	75277902	75290971	2	5617	18369.8	2287.07	373	BCAR1	CTRB2,CTRB1,BCAR1	BCAR1	373	1
15_SCC104_H3K27ac_peak_7284_lociStitched	chr10	33401527	33432237	15	9501	18908.1	2837.6	374			ITGB1	374	1
16_SCC104_H3K27ac_peak_32584_lociStitched	chr2	150981754	151001806	16	10010	18590.2	2542.59	375			RND3	375	1
17_SCC104_H3K27ac_peak_9417_lociStitched	chr11	10508076	10545537	17	9671	18940.3	2936.94	376	AMPD3,MTRNR2L8,RNF141	LOC100129827,LYVE1	MTRNR2L8	376	1
3_SCC104_H3K27ac_peak_46170_lociStitched	chr5	52765899	52780151	3	6017	17109.5	1118.78	377	FST		FST	377	1
5_SCC104_H3K27ac_peak_43801_lociStitched	chr4	74973412	74981018	5	6707	17045.8	1066.36	378		MTHFD2L,CXCL2	CXCL2	378	1
15_SCC104_H3K27ac_peak_29002_lociStitched	chr19	45929821	45959867	15	6997	19749.2	3809.83	379		PPM1N,FOSB,ERCC1,PPP1R13L,RTN2,CD3EAP	ERCC1	379	1
6_SCC104_H3K27ac_peak_48700_lociStitched	chr6	11766420	11773813	6	6043	16822	913.035	380	C6orf105		C6orf105	380	1
10_SCC104_H3K27ac_peak_33710_lociStitched	chr2	208103138	208123860	10	7597	18852.9	2959.1	381			KLF7	381	1
5_SCC104_H3K27ac_peak_5272_lociStitched	chr1	201365044	201377441	5	5475	17962	2075.26	382	TNNI1,LAD1	TNNT2	LAD1	382	1
4_SCC104_H3K27ac_peak_60116_lociStitched	chr9	134874760	134885010	4	4947	18575	2717.28	383	MED27		MED27	383	1
7_SCC104_H3K27ac_peak_27448_lociStitched	chr19	4051356	4065882	7	7348	17332.4	1499.08	384	ZBTB7A	PIAS4	ZBTB7A	384	1
10_SCC104_H3K27ac_peak_25230_lociStitched	chr17	70569446	70606317	10	7331	20415.5	4608.88	385	LOC100499467,FLJ26484		LOC100499467	385	1
16_SCC104_H3K27ac_peak_57002_lociStitched	chr8	119011946	119048164	16	7379	22248.7	6461.29	386	EXT1		EXT1	386	1
9_SCC104_H3K27ac_peak_59421_lociStitched	chr9	117035242	117051368	9	5450	20094.6	4320.16	387	COL27A1	ORM2,ORM1	ORM1	387	1
7_SCC104_H3K27ac_peak_53113_lociStitched	chr7	46687946	46695492	7	5200	17477.3	1703.13	388			IGFBP3	388	1
11_SCC104_H3K27ac_peak_44121_lociStitched	chr4	87751699	87777301	11	8321	18433.4	2660.05	389	SLC10A6	C4orf36	SLC10A6	389	1
19_SCC104_H3K27ac_peak_32354_lociStitched	chr2	129120315	129154357	19	6251	20156.3	4442.48	390		HS6ST1	HS6ST1	390	1
5_SCC104_H3K27ac_peak_22510_lociStitched	chr16	84532674	84538362	5	4675	16710.8	1000.52	391	KIAA1609		KIAA1609	391	1
7_SCC104_H3K27ac_peak_37819_lociStitched	chr22	31639170	31651752	7	7518	16979.4	1297.2	392	LIMK2	PIK3IP1	LIMK2	392	1
7_SCC104_H3K27ac_peak_13791_lociStitched	chr12	53610902	53624408	7	6446	17841.4	2167.71	393	RARG	ESPL1,MFSD5,ZNF740,ITGB7,CSAD	RARG	393	1
7_SCC104_H3K27ac_peak_23381_lociStitched	chr17	17044708	17060898	7	6103	19204.6	3540.75	394	MPRIP	PLD6	PLD6	394	1
27_SCC104_H3K27ac_peak_53863_lociStitched	chr7	92328550	92397153	27	9786	22762.5	7107.27	395	CDK6		CDK6	395	1
4_SCC104_H3K27ac_peak_46010_lociStitched	chr5	42999990	43010447	4	4139	19921.6	4280.05	396		LOC648987,LOC153684,C5orf39	LOC648987	396	1
16_SCC104_H3K27ac_peak_56754_lociStitched	chr8	102074992	102121795	16	7160	25231.5	9589.93	397	FLJ42969		FLJ42969	397	1
16_SCC104_H3K27ac_peak_27566_lociStitched	chr19	6056391	6104295	16	9063	19506.5	3875.43	398	RFX2	RFX2,ACSBG2	RFX2	398	1
15_SCC104_H3K27ac_peak_12533_lociStitched	chr12	6321002	6341450	15	7065	18808.1	3222.6	399	CD9		CD9	399	1
11_SCC104_H3K27ac_peak_28935_lociStitched	chr19	45244818	45278410	11	7101	19829.4	4246.03	400	BCL3	CEACAM16,CBLC,BCAM	BCL3	400	1
8_SCC104_H3K27ac_peak_53143_lociStitched	chr7	47400873	47421374	8	5889	20191.4	4647.58	401	TNS3		TNS3	401	1
12_SCC104_H3K27ac_peak_58196_lociStitched	chr9	33151274	33193922	12	7497	20829.3	5292.62	402	B4GALT1	SPINK4	B4GALT1	402	1
6_SCC104_H3K27ac_peak_20752_lociStitched	chr16	2201149	2214207	6	5962	17940.4	2424.87	403	TRAF7,SNORD60,RAB26	CASKIN1,MIR3180-5,MLST8,PKD1,C16orf79	TRAF7	403	1
8_SCC104_H3K27ac_peak_58933_lociStitched	chr9	97766102	97783444	8	6801	18448.4	2968.95	404	C9orf3		MIR23B	404	1
12_SCC104_H3K27ac_peak_55922_lociStitched	chr8	42348190	42374178	12	7886	17198.9	1790.57	405	SLC20A2	C8orf40	C8orf40	405	1
9_SCC104_H3K27ac_peak_17932_lociStitched	chr14	68973008	69016081	9	6159	21321.1	5982.84	406	RAD51L1		ZFP36L1	406	1
4_SCC104_H3K27ac_peak_56677_lociStitched	chr8	99951914	99961005	4	6666	18022.9	2686.39	407	OSR2	OSR2	OSR2	407	1
22_SCC104_H3K27ac_peak_54426_lociStitched	chr7	116066706	116106965	22	9658	18796.9	3478.38	408		CAV2	CAV2	408	1
15_SCC104_H3K27ac_peak_27351_lociStitched	chr19	2525309	2546923	15	7307	16900	1582.14	409	GNG7	GADD45B	GADD45B	409	1
5_SCC104_H3K27ac_peak_40939_lociStitched	chr3	136670656	136681333	5	6905	17543.4	2242.17	410	IL20RB	NCK1	IL20RB	410	1
4_SCC104_H3K27ac_peak_59208_lociStitched	chr9	111592973	111601607	4	4622	17250.7	2018.63	411		ACTL7A,ACTL7B	ACTL7B	411	1
7_SCC104_H3K27ac_peak_57388_lociStitched	chr8	131027753	131055528	7	4531	20017.4	4813.41	412			FAM49B	412	1
10_SCC104_H3K27ac_peak_34908_lociStitched	chr20	5041138	5059572	10	3997	19564	4376.23	413		PCNA,CDS2,PCNA-AS1,C20orf30	C20orf30	413	1
10_SCC104_H3K27ac_peak_23427_lociStitched	chr17	17631460	17656677	10	6273	20357.7	5174.53	414	RAI1	SMCR5	SMCR5	414	1
6_SCC104_H3K27ac_peak_24512_lociStitched	chr17	43199473	43207626	6	6500	16287.2	1116.15	415	PLCD3	ACBD4,HEXIM1,HEXIM2	PLCD3	415	1
2_SCC104_H3K27ac_peak_42673_lociStitched	chr4	3484993	3488391	2	3348	15950.2	796.151	416	DOK7	DOK7,LRPAP1,HGFAC	DOK7	416	1
14_SCC104_H3K27ac_peak_15390_lociStitched	chr12	123610630	123636319	14	8237	18288	3144.33	417		PITPNM2	PITPNM2	417	1
11_SCC104_H3K27ac_peak_10843_lociStitched	chr11	67006853	67045479	11	6324	22418.5	7288.73	418	KDM2A,ADRBK1	ANKRD13D,SSH3,LOC100130987	ADRBK1	418	1
2_SCC104_H3K27ac_peak_59889_lociStitched	chr9	131396946	131399743	2	2678	16125.8	1023.14	419	WDR34	SET	WDR34	419	1
14_SCC104_H3K27ac_peak_39572_lociStitched	chr3	50184312	50208056	14	9138	17900.6	2849.28	420	SEMA3F	GNAT1,SLC38A3	SEMA3F	420	1
15_SCC104_H3K27ac_peak_58079_lociStitched	chr9	22081406	22118740	15	7531	18950.7	3905.14	421	CDKN2B-AS1		CDKN2B	421	1
17_SCC104_H3K27ac_peak_35579_lociStitched	chr20	33890680	33917365	17	7683	20395.3	5387.7	422	UQCC	EIF6,FAM83C	FAM83C	422	1
6_SCC104_H3K27ac_peak_31176_lociStitched	chr2	65792107	65805225	6	4961	16830.4	1856.2	423			SPRED2	423	1
3_SCC104_H3K27ac_peak_51983_lociStitched	chr7	87605	101794	3	4155	18970.7	4009.81	424			FAM20C	424	1
4_SCC104_H3K27ac_peak_36608_lociStitched	chr21	30003310	30011225	4	7177	15985.9	1029.74	425			NCRNA00161	425	1
3_SCC104_H3K27ac_peak_782_lociStitched	chr1	19280082	19299559	3	3886	17591.6	2656.66	426	IFFO2		IFFO2	426	1
11_SCC104_H3K27ac_peak_51117_lociStitched	chr6	126260853	126272008	11	8555	16584.1	1672.13	427		HINT3,TRMT11	HINT3	427	1
5_SCC104_H3K27ac_peak_28029_lociStitched	chr19	16180651	16191075	5	5569	15771.5	865.192	428	TPM4	FLJ25328,RAB8A	TPM4	428	1
8_SCC104_H3K27ac_peak_38043_lociStitched	chr22	38283167	38295657	8	6179	16074.6	1170.31	429	EIF3L	MIR659,ANKRD54,MIR658,MICALL1	MICALL1	429	1
9_SCC104_H3K27ac_peak_30006_lociStitched	chr2	20371653	20386342	9	7995	16401.7	1532.06	430		SDC1	SDC1	430	1
9_SCC104_H3K27ac_peak_13632_lociStitched	chr12	51006754	51016173	9	7961	16106.5	1250.84	431	DIP2B		DIP2B	431	1
6_SCC104_H3K27ac_peak_52087_lociStitched	chr7	1492112	1506928	6	5189	19437.1	4604.81	432	MICALL2	INTS1	MICALL2	432	1
12_SCC104_H3K27ac_peak_47663_lociStitched	chr5	149851896	149877776	12	6977	16708.1	1912.53	433		NDST1,RPS14	NDST1	433	1
14_SCC104_H3K27ac_peak_36803_lociStitched	chr21	36550948	36591580	14	7733	20039.7	5339.04	434			RUNX1	434	1
13_SCC104_H3K27ac_peak_46118_lociStitched	chr5	52537316	52555491	13	8997	16139.4	1464.9	435			LOC257396	435	1
21_SCC104_H3K27ac_peak_54478_lociStitched	chr7	116314652	116357270	21	8609	19791.8	5122.68	436	MET	MET	MET	436	1
9_SCC104_H3K27ac_peak_2109_lociStitched	chr1	43514653	43539181	9	5746	19362.4	4726.55	437			FAM183A	437	1
4_SCC104_H3K27ac_peak_10437_lociStitched	chr11	63326777	63341955	4	7599	16943.2	2340.45	438	HRASLS2,PLA2G16	RARRES3	HRASLS2	438	1
6_SCC104_H3K27ac_peak_52109_lociStitched	chr7	1598493	1607128	6	3735	16910.8	2384.12	439	PSMG3	TMEM184A,TFAMP1,KIAA1908,MAFK	TMEM184A	439	1
13_SCC104_H3K27ac_peak_30259_lociStitched	chr2	28859444	28885486	13	6928	17956	3437.54	440	PLB1		PPP1CB	440	1
14_SCC104_H3K27ac_peak_36784_lociStitched	chr21	36508250	36522543	14	8117	16071	1553.65	441			RUNX1	441	1
4_SCC104_H3K27ac_peak_59973_lociStitched	chr9	132168945	132176854	4	2543	16163.6	1656.14	442			C9orf106	442	1
7_SCC104_H3K27ac_peak_42318_lociStitched	chr3	194033014	194054540	7	3516	19093.6	4606.56	443		LRRC15,LOC100131551,CPN2	LOC100131551	443	1
7_SCC104_H3K27ac_peak_10574_lociStitched	chr11	64602568	64624688	7	6401	18830.8	4353.22	444	CDC42BPG,EHD1	MEN1,MAP4K2,MIR192,MIR194-2	CDC42BPG	444	1
9_SCC104_H3K27ac_peak_41619_lociStitched	chr3	171797248	171823031	9	5032	20536.2	6102.84	445	FNDC3B		FNDC3B	445	1
10_SCC104_H3K27ac_peak_4937_lociStitched	chr1	183149297	183187968	10	6274	18975.9	4543.84	446	LAMC2		LAMC2	446	1
9_SCC104_H3K27ac_peak_54287_lociStitched	chr7	106089378	106102856	9	5918	16065.8	1644.32	447			NAMPT	447	1
8_SCC104_H3K27ac_peak_23368_lociStitched	chr17	16918408	16948613	8	7592	19751	5382.53	448	MPRIP	TNFRSF13B	MPRIP	448	1
9_SCC104_H3K27ac_peak_41136_lociStitched	chr3	149084246	149105966	9	7536	18690.1	4363.55	449	TM4SF1	TM4SF18	TM4SF1	449	1
8_SCC104_H3K27ac_peak_23903_lociStitched	chr17	34110086	34118365	8	6811	15569.5	1243.51	450	MMP28	GAS2L2,C17orf50,TAF15	MMP28	450	1
3_SCC104_H3K27ac_peak_57558_lociStitched	chr8	143869918	143877538	3	4998	15931.1	1616.96	451		LYPD2,LY6D,SLURP1,LYNX1,GML	LY6D	451	1
13_SCC104_H3K27ac_peak_5583_lociStitched	chr1	207046978	207083383	13	7492	18799.5	4510.58	452	FAIM3,IL24	IL20,FAIM3,PIGR,IL19,IL24	IL24	452	1
8_SCC104_H3K27ac_peak_37259_lociStitched	chr21	45184755	45202482	8	5497	16757.3	2499.51	453	CSTB	LOC284837,PDXK,RRP1	CSTB	453	1
14_SCC104_H3K27ac_peak_6674_lociStitched	chr10	3796934	3827394	14	7346	16966.2	2726.17	454	KLF6	KLF6	KLF6	454	1
3_SCC104_H3K27ac_peak_1654_lociStitched	chr1	33684612	33688379	3	3410	15190.4	966.612	455		ZNF362,TRIM62	ZNF362	455	1
4_SCC104_H3K27ac_peak_24965_lociStitched	chr17	57859739	57869460	4	5881	15103.5	898.22	456	TMEM49	MIR21	MIR21	456	1
3_SCC104_H3K27ac_peak_3683_lociStitched	chr1	145448543	145457275	3	4928	15555.2	1354.33	457	POLR3GL	LIX1L,TXNIP,HFE2,ANKRD34A	TXNIP	457	1
9_SCC104_H3K27ac_peak_21971_lociStitched	chr16	67428937	67443790	9	6475	16403.7	2235.38	458	ZDHHC1	LRRC36,HSD11B2,TPPP3	TPPP3	458	1
10_SCC104_H3K27ac_peak_28487_lociStitched	chr19	38642900	38665732	10	5368	16767.8	2625.68	459	SIPA1L3	DPF1	DPF1	459	1
2_SCC104_H3K27ac_peak_49597_lociStitched	chr6	35452393	35456474	2	3782	14872	758.658	460	TEAD3	FANCE,RPL10A,TULP1	TEAD3	460	1
16_SCC104_H3K27ac_peak_42496_lociStitched	chr3	197205969	197244176	16	5946	24211.8	10105.8	461	BDH1		BDH1	461	1
6_SCC104_H3K27ac_peak_5741_lociStitched	chr1	209982711	209999298	6	4185	16535.6	2433.31	462		C1orf74,C1orf107,IRF6	C1orf107	462	1
10_SCC104_H3K27ac_peak_34626_lociStitched	chr2	241294509	241314306	10	5574	17092.7	2991.33	463			GPC1	463	1
13_SCC104_H3K27ac_peak_48001_lociStitched	chr5	167416905	167444689	13	9581	16303.7	2281.07	464	ODZ2		WWC1	464	1
9_SCC104_H3K27ac_peak_50188_lociStitched	chr6	53475626	53494686	9	6494	16324.9	2304.35	465		KLHL31	KLHL31	465	1
10_SCC104_H3K27ac_peak_38086_lociStitched	chr22	38694022	38732653	10	7771	17217.8	3214.1	466	CSNK1E	TMEM184B	CSNK1E	466	1
12_SCC104_H3K27ac_peak_56387_lociStitched	chr8	80030715	80044097	12	6668	15480.3	1504.14	467			IL7	467	1
15_SCC104_H3K27ac_peak_57382_lociStitched	chr8	130983186	131012888	15	6580	20167.7	6198.81	468		FAM49B	FAM49B	468	1
13_SCC104_H3K27ac_peak_36078_lociStitched	chr20	48757261	48783172	13	6472	18047	4099.12	469	TMEM189,TMEM189-UBE2V1	UBE2V1,CEBPB	TMEM189	469	1
11_SCC104_H3K27ac_peak_42438_lociStitched	chr3	196500211	196521197	11	6480	18119.3	4174.12	470	PAK2		PAK2	470	1
12_SCC104_H3K27ac_peak_40575_lociStitched	chr3	123318948	123351657	12	7992	18689.9	4749.35	471	MYLK	PTPLB	MYLK	471	1
3_SCC104_H3K27ac_peak_27201_lociStitched	chr19	1016757	1029095	3	5052	15259.6	1338.67	472	CNN2,C19orf6	GRIN3B,HMHA1,WDR18,CNN2,ABCA7,C19orf6	C19orf6	472	1
8_SCC104_H3K27ac_peak_36332_lociStitched	chr20	57031969	57038514	8	5420	15285.2	1393.43	473	APCDD1L		APCDD1L	473	1
11_SCC104_H3K27ac_peak_52878_lociStitched	chr7	41136382	41157103	11	7348	17789	3901.76	474			LOC285954	474	1
5_SCC104_H3K27ac_peak_9399_lociStitched	chr11	10323270	10330865	5	6837	14700.1	837.729	475	ADM	SBF2	ADM	475	1
11_SCC104_H3K27ac_peak_37957_lociStitched	chr22	36850770	36868249	11	7155	15558.1	1702.45	476	TXN2	FOXRED2	TXN2	476	1
12_SCC104_H3K27ac_peak_20505_lociStitched	chr15	99965022	99996446	12	7762	17044.4	3198.96	477			MEF2A	477	1
8_SCC104_H3K27ac_peak_62051_lociStitched	chrX	152739927	152755792	8	5473	17210.4	3369.73	478		TREX2,BGN,ATP2B3,HAUS7	HAUS7	478	1
10_SCC104_H3K27ac_peak_35370_lociStitched	chr20	25275668	25296443	10	4752	19487	5692.35	479	PYGB,ABHD12		PYGB	479	1
7_SCC104_H3K27ac_peak_45576_lociStitched	chr5	14263182	14270295	7	5642	16994.4	3211.52	480	TRIO		TRIO	480	1
7_SCC104_H3K27ac_peak_23710_lociStitched	chr17	27475515	27484200	7	6059	15173.6	1405.23	481	MYO18A	MYO18A	MYO18A	481	1
5_SCC104_H3K27ac_peak_4117_lociStitched	chr1	154971785	154990713	5	6592	16849.7	3083.37	482	ZBTB7B	ADAM15,PYGO2,EFNA4,DCST2,MIR4258,FLAD1,PBXIP1,DCST1,SHC1,CKS1B,LENEP	ZBTB7B	482	1
12_SCC104_H3K27ac_peak_1634_lociStitched	chr1	33447107	33473560	12	6725	18101.8	4340.94	483	AK2	AK2,RNF19B	RNF19B	483	1
7_SCC104_H3K27ac_peak_45630_lociStitched	chr5	16483956	16495126	7	3603	17683.2	3925.14	484	FAM134B	ZNF622	FAM134B	484	1
3_SCC104_H3K27ac_peak_47206_lociStitched	chr5	134366283	134375308	3	5504	14712.6	1030.65	485	PITX1		PITX1	485	1
13_SCC104_H3K27ac_peak_965_lociStitched	chr1	22554875	22581528	13	7012	17588.3	3939.31	486			WNT4	486	1
21_SCC104_H3K27ac_peak_43213_lociStitched	chr4	38156333	38195178	21	7109	18715.5	5069.27	487			PTTG2	487	1
9_SCC104_H3K27ac_peak_52100_lociStitched	chr7	1552518	1578244	9	6105	19971.1	6326.02	488	MAFK	INTS1,PSMG3,KIAA1908,TMEM184A	MAFK	488	1
7_SCC104_H3K27ac_peak_18424_lociStitched	chr14	93501870	93513111	7	5677	14887.6	1256.74	489	ITPK1	ITPK1-AS1	ITPK1-AS1	489	1
2_SCC104_H3K27ac_peak_45390_lociStitched	chr5	2756379	2760198	2	3570	15726.3	2103.89	490		C5orf38,IRX2	C5orf38	490	1
6_SCC104_H3K27ac_peak_25347_lociStitched	chr17	73119701	73132126	6	4147	15379.7	1840.14	491	ARMC7,HN1,NT5C	SLC16A5,HN1,SUMO2	NT5C	491	1
5_SCC104_H3K27ac_peak_53205_lociStitched	chr7	47821974	47827737	5	4966	14897.4	1361.22	492	PKD1L1	C7orf69	C7orf69	492	1
6_SCC104_H3K27ac_peak_52545_lociStitched	chr7	23504664	23518939	6	4864	16367.7	2837.87	493	IGF2BP3	RPS2P32	IGF2BP3	493	1
6_SCC104_H3K27ac_peak_13483_lociStitched	chr12	48206312	48229547	6	5515	16717.6	3197.14	494	HDAC7	SLC48A1,HDAC7	HDAC7	494	1
12_SCC104_H3K27ac_peak_36939_lociStitched	chr21	39831007	39861510	12	7836	17325.7	3822.03	495	ERG	ERG	ERG	495	1
4_SCC104_H3K27ac_peak_62035_lociStitched	chrX	152062251	152067248	4	4522	14738.2	1250.75	496		ZNF185	ZNF185	496	1
10_SCC104_H3K27ac_peak_47583_lociStitched	chr5	148818792	148833766	10	7956	14828.8	1358.14	497		MIR143,MIR145,LOC728264	MIR145	497	1
12_SCC104_H3K27ac_peak_33433_lociStitched	chr2	192066078	192095267	12	7190	16550.2	3108.63	498		MYO1B	MYO1B	498	1
6_SCC104_H3K27ac_peak_31336_lociStitched	chr2	70362947	70374657	6	3189	15262.8	1837.3	499		PCBP1,LOC100133985,LOC400960,C2orf42	LOC100133985	499	1
6_SCC104_H3K27ac_peak_31160_lociStitched	chr2	65609841	65617693	6	4654	15025.6	1600.24	500	SPRED2	SPRED2	SPRED2	500	1
8_SCC104_H3K27ac_peak_53629_lociStitched	chr7	75993056	76023693	8	5123	16672.7	3287.35	501	SRCRB4D	ZP3,YWHAG	ZP3	501	1
7_SCC104_H3K27ac_peak_12700_lociStitched	chr12	10017413	10036591	7	7445	15712.5	2330.13	502	CLEC2B,KLRF2	KLRF1,CLEC2A	CLEC2B	502	1
9_SCC104_H3K27ac_peak_52704_lociStitched	chr7	30202342	30213217	9	6270	16437.6	3076.54	503	C7orf41		C7orf41	503	1
7_SCC104_H3K27ac_peak_3464_lociStitched	chr1	109796680	109818840	7	4578	17320.3	3959.99	504	CELSR2	SARS,PSRC1,MYBPHL	CELSR2	504	1
10_SCC104_H3K27ac_peak_47974_lociStitched	chr5	167225242	167244907	10	7951	15132.2	1795.41	505	ODZ2		WWC1	505	1
9_SCC104_H3K27ac_peak_40661_lociStitched	chr3	125915875	125935249	9	5758	15989.4	2685.24	506		ALDH1L1	ALDH1L1	506	1
5_SCC104_H3K27ac_peak_60965_lociStitched	chrX	45705094	45712325	5	4529	14006.4	714.423	507			MIR222	507	1
10_SCC104_H3K27ac_peak_25746_lociStitched	chr17	79011434	79039623	10	5966	17434.9	4163.52	508	BAIAP2	CHMP6,FLJ90757	BAIAP2	508	1
17_SCC104_H3K27ac_peak_19047_lociStitched	chr15	39464559	39506742	17	8656	16742.4	3492.75	509		C15orf54	C15orf54	509	1
4_SCC104_H3K27ac_peak_44213_lociStitched	chr4	95368594	95375658	4	4860	14265.7	1042.65	510	PDLIM5	PDLIM5	PDLIM5	510	1
11_SCC104_H3K27ac_peak_62002_lociStitched	chrX	151138794	151155004	11	5540	16607.1	3387.89	511	GABRE	MIR452	GABRE	511	1
4_SCC104_H3K27ac_peak_58795_lociStitched	chr9	95440291	95445406	4	4302	14258.6	1072.1	512		IPPK	IPPK	512	1
4_SCC104_H3K27ac_peak_26984_lociStitched	chr18	61138959	61147127	4	4774	14316.1	1189.26	513	SERPINB5	VPS4B	SERPINB5	513	1
8_SCC104_H3K27ac_peak_56251_lociStitched	chr8	67429947	67448747	8	6818	16410.5	3284.36	514	C8orf46		C8orf46	514	1
4_SCC104_H3K27ac_peak_13780_lociStitched	chr12	53460033	53466823	4	5903	14259.7	1171.95	515	SPRYD3	TENC1,SOAT2,IGFBP6,LOC283335	SPRYD3	515	1
16_SCC104_H3K27ac_peak_33087_lociStitched	chr2	173292285	173327802	16	6529	17744.3	4666.93	516	ITGA6	ITGA6	ITGA6	516	1
25_SCC104_H3K27ac_peak_9941_lociStitched	chr11	34646408	34676934	25	9269	16191	3122.81	517	EHF		EHF	517	1
8_SCC104_H3K27ac_peak_801_lociStitched	chr1	19354844	19362857	8	4956	14459.5	1403.08	518			IFFO2	518	1
16_SCC104_H3K27ac_peak_5346_lociStitched	chr1	201976199	202027911	16	8972	19376.5	6350.23	519	ELF3	RNPEP,ELF3	ELF3	519	1
3_SCC104_H3K27ac_peak_45325_lociStitched	chr5	671778	674721	3	2562	14670	1655.73	520	TPPP		TPPP	520	1
3_SCC104_H3K27ac_peak_15197_lociStitched	chr12	120695340	120703564	3	3916	14289.2	1280.48	521	PXN	PXN,SIRT4	PXN	521	1
3_SCC104_H3K27ac_peak_8012_lociStitched	chr10	81964195	81969316	3	4549	13494.9	496.225	522	ANXA11	ANXA11	ANXA11	522	1
11_SCC104_H3K27ac_peak_43121_lociStitched	chr4	30748079	30772536	11	6289	15383.5	2401.68	523	PCDH7		PCDH7	523	1
6_SCC104_H3K27ac_peak_3853_lociStitched	chr1	151166456	151174518	6	6209	13986.8	1041.61	524	PIP5K1A	TNFAIP8L2,VPS72,LYSMD1,TMOD4,SCNM1,SEMA6C,PIP5K1A	PIP5K1A	524	1
6_SCC104_H3K27ac_peak_24377_lociStitched	chr17	40818828	40831933	6	7181	15174.3	2229.16	525	CCR10,TUBG2,PLEKHH3	CNTNAP1	PLEKHH3	525	1
5_SCC104_H3K27ac_peak_18746_lociStitched	chr14	105143630	105155827	5	6627	14288.8	1348.99	526		ADSSL1,INF2	INF2	526	1
2_SCC104_H3K27ac_peak_13709_lociStitched	chr12	52672342	52675837	2	3400	13511.3	623.159	527		KRT86,KRT7,KRT83,KRT81	KRT81	527	1
3_SCC104_H3K27ac_peak_35036_lociStitched	chr20	10981034	10985046	3	3566	14253	1383.34	528			JAG1	528	1
5_SCC104_H3K27ac_peak_42665_lociStitched	chr4	3385904	3390548	5	3958	13810.3	952.949	529	RGS12		RGS12	529	1
11_SCC104_H3K27ac_peak_15666_lociStitched	chr13	20960987	20981079	11	6162	15567.3	2734.52	530	CRYL1		CRYL1	530	1
13_SCC104_H3K27ac_peak_20113_lociStitched	chr15	80871785	80891629	13	5421	16034	3216.71	531	ARNT2		FAM108C1	531	1
4_SCC104_H3K27ac_peak_21606_lociStitched	chr16	48630389	48647394	4	5287	14714.4	1921.57	532	N4BP1		N4BP1	532	1
10_SCC104_H3K27ac_peak_31210_lociStitched	chr2	67514786	67532200	10	5056	15432.3	2645.19	533			ETAA1	533	1
10_SCC104_H3K27ac_peak_45770_lociStitched	chr5	31909428	31923004	10	5468	18323.5	5568.88	534	PDZD2	MIR4279	MIR4279	534	1
6_SCC104_H3K27ac_peak_3018_lociStitched	chr1	86887208	86897499	6	6440	14319.9	1617.75	535	CLCA2	CLCA1,ODF2L	CLCA2	535	1
3_SCC104_H3K27ac_peak_4267_lociStitched	chr1	156471872	156475851	3	3805	13278.3	578.149	536		MEF2D	MEF2D	536	1
7_SCC104_H3K27ac_peak_35298_lociStitched	chr20	23063577	23081990	7	5886	17691.2	5004.65	537	CD93	SSTR4,LOC200261,THBD	CD93	537	1
3_SCC104_H3K27ac_peak_52515_lociStitched	chr7	22897658	22901437	3	2929	13582.1	908.094	538		TOMM7,SNORD93	SNORD93	538	1
13_SCC104_H3K27ac_peak_48423_lociStitched	chr6	3797538	3827212	13	6737	16210.9	3549.01	539		C6orf145,FAM50B	FAM50B	539	1

## Sheet: SCC152 ROSE SE output
#SCC152_H3K27ac_summits Enhancers									OVERLAP_GENES	PROXIMAL_GENES	CLOSEST_GENE	enhancerRank	isSuper
28_SCC152_H3K27ac_peak_61199_lociStitched	chr9	100625346	100681548	28	56	532160	153313	1	C9orf156	FOXE1,HEMGN	C9orf156	1	1
47_SCC152_H3K27ac_peak_44042_lociStitched	chr3	188987595	189089589	47	94	154857	34851.3	2	TPRG1		TPRG1	2	1
16_SCC152_H3K27ac_peak_25276_lociStitched	chr17	39784469	39822478	16	32	105133	6153.66	3	KRT42P	KRT17,GAST,EIF1,KRT16,KRT14	KRT42P	3	1
3_SCC152_H3K27ac_peak_53948_lociStitched	chr7	5458057	5470200	3	8	93615.2	1929.52	4	TNRC18		TNRC18	4	1
17_SCC152_H3K27ac_peak_5478_lociStitched	chr1	201260212	201283032	17	34	95100.1	6444.37	5	PKP1	PKP1	PKP1	5	1
25_SCC152_H3K27ac_peak_60932_lociStitched	chr9	95478779	95544701	25	54	99812.5	12096.7	6	BICD2	ANKRD19,IPPK,BICD2	BICD2	6	1
23_SCC152_H3K27ac_peak_43215_lociStitched	chr3	171469682	171525491	23	46	106249	23702.1	7	PLD1	TMEM212	PLD1	7	1
33_SCC152_H3K27ac_peak_42514_lociStitched	chr3	141102654	141161256	33	66	95626.7	15353.7	8	ZBTB38	RASA2	RASA2	8	1
26_SCC152_H3K27ac_peak_14209_lociStitched	chr12	52534410	52611536	26	62	89373.6	10118.9	9	KRT80,LOC283404	KRT7	KRT80	9	1
12_SCC152_H3K27ac_peak_6831_lociStitched	chr1	234723915	234750011	12	26	81638.7	5482.77	10	IRF2BP2	NCRNA00184	IRF2BP2	10	1
23_SCC152_H3K27ac_peak_5904_lociStitched	chr1	209521548	209591944	23	46	86382.9	15818	11		MIR205,LOC642587	LOC642587	11	1
21_SCC152_H3K27ac_peak_4428_lociStitched	chr1	156066761	156100548	21	50	77233.7	7477.06	12	LMNA	ROBLD3,RAB25,SEMA4A,UBQLN4,MEX3A	LMNA	12	1
27_SCC152_H3K27ac_peak_62093_lociStitched	chr9	130291179	130348088	27	64	79097.8	10044.4	13	FAM129B	STXBP1	FAM129B	13	1
29_SCC152_H3K27ac_peak_61086_lociStitched	chr9	97851473	97893627	29	58	73773.7	8055.63	14	FANCC	MIR3074,MIR27B,MIR23B,MIR24-1	MIR3074	14	1
39_SCC152_H3K27ac_peak_26870_lociStitched	chr17	76701237	76797480	39	84	77639.2	12877.3	15	CYTH1,USP36		CYTH1	15	1
35_SCC152_H3K27ac_peak_52882_lociStitched	chr6	134745429	134799354	35	70	73607.6	9183.43	16			SGK1	16	1
3_SCC152_H3K27ac_peak_29212_lociStitched	chr19	12893935	12906828	3	10	64916.3	2462.56	17	JUNB	ASNA1,HOOK2,RNASEH2A,PRDX2,RTBDN,C19orf43,MAST1,BEST2	JUNB	17	1
12_SCC152_H3K27ac_peak_18824_lociStitched	chr14	77487489	77512719	12	28	63806.7	3736.56	18	C14orf4		C14orf4	18	1
30_SCC152_H3K27ac_peak_13020_lociStitched	chr12	6291250	6339417	30	64	66041.8	6035.33	19	CD9		CD9	19	1
31_SCC152_H3K27ac_peak_19371_lociStitched	chr14	103571206	103652515	31	72	70267.2	10521.4	20	C14orf73,TNFAIP2	LOC100131366,CDC42BPB	TNFAIP2	20	1
23_SCC152_H3K27ac_peak_1968_lociStitched	chr1	41323057	41373177	23	52	67316.2	8244.74	21	CITED4		CITED4	21	1
20_SCC152_H3K27ac_peak_29839_lociStitched	chr19	35579786	35618707	20	46	67162.1	8375.8	22	LOC100128675,FXYD3,LGI4	HPN,FXYD1,FXYD5,FXYD7	LOC100128675	22	1
13_SCC152_H3K27ac_peak_62269_lociStitched	chr9	132222999	132259408	13	26	63948.8	6466.24	23			C9orf50	23	1
9_SCC152_H3K27ac_peak_721_lociStitched	chr1	16157164	16178199	9	24	60029.7	3146.84	24	SPEN,FLJ37453	UQCRHL	SPEN	24	1
7_SCC152_H3K27ac_peak_59780_lociStitched	chr9	14310887	14330960	7	18	58346.2	3328.1	25	NFIB	NFIB	NFIB	25	1
20_SCC152_H3K27ac_peak_31608_lociStitched	chr2	20371969	20436739	20	44	61479.7	8329.42	26	SDC1		SDC1	26	1
5_SCC152_H3K27ac_peak_44240_lociStitched	chr3	193850106	193859088	5	14	55996.5	4388.61	27	HES1		HES1	27	1
11_SCC152_H3K27ac_peak_39852_lociStitched	chr22	46462524	46478941	11	22	53140.2	1697.52	28		LOC400931,C22orf26,MIRLET7A3,MIR3619,LOC100271722,LOC150381,MIRLET7B	LOC400931	28	1
27_SCC152_H3K27ac_peak_11546_lociStitched	chr11	65239463	65276125	27	60	54329.4	2995.29	29	MALAT1	NEAT1,MIR612,SCYL1,LTBP3	MALAT1	29	1
7_SCC152_H3K27ac_peak_4295_lociStitched	chr1	155091900	155104486	7	16	53743.5	2956.45	30	EFNA1	EFNA3,DPM3,TRIM46,EFNA1,KRTCAP2,SLC50A1	EFNA1	30	1
16_SCC152_H3K27ac_peak_37796_lociStitched	chr20	60925766	60955699	16	34	54561.9	4525.87	31	LAMA5	RPS21,C20orf151,ADRM1,CABLES2	LAMA5	31	1
29_SCC152_H3K27ac_peak_44127_lociStitched	chr3	189510014	189560901	29	60	68600.8	20141.1	32	TP63,MIR944	TP63	MIR944	32	1
10_SCC152_H3K27ac_peak_48846_lociStitched	chr5	134360169	134383347	10	22	51703.2	4049.2	33	PITX1		PITX1	33	1
18_SCC152_H3K27ac_peak_21547_lociStitched	chr15	93344879	93389328	18	36	51903.1	4462.68	34		LOC100507217,ASB9P1	ASB9P1	34	1
26_SCC152_H3K27ac_peak_43554_lociStitched	chr3	181622231	181674197	26	52	61985	14846.7	35			SOX2	35	1
7_SCC152_H3K27ac_peak_4181_lociStitched	chr1	153534841	153550536	7	20	49740.6	3223.75	36	S100A2	S100A13,S100A5,S100A3,S100A14,S100A16,S100A4,S100A6	S100A2	36	1
17_SCC152_H3K27ac_peak_16900_lociStitched	chr13	73629210	73664457	17	38	52066.9	5798.13	37	KLF5		KLF5	37	1
11_SCC152_H3K27ac_peak_57073_lociStitched	chr8	21959332	21994836	11	38	51484.4	6252.25	38	HR,NUDT18,FAM160B2	EPB49,HR,SFTPC,REEP4,BMP1,LGI3	NUDT18	38	1
11_SCC152_H3K27ac_peak_14295_lociStitched	chr12	53261399	53274888	11	22	46638.2	1939.72	39		KRT8,KRT79,KRT78	KRT78	39	1
25_SCC152_H3K27ac_peak_55312_lociStitched	chr7	75910740	75947731	25	56	48591.4	4131.89	40	HSPB1,SRRM3	YWHAG	HSPB1	40	1
17_SCC152_H3K27ac_peak_43607_lociStitched	chr3	181960297	182004326	17	34	58382.5	14340.2	41			ATP11B	41	1
24_SCC152_H3K27ac_peak_1827_lociStitched	chr1	39568928	39610767	24	48	49642	6376.26	42	MACF1		MACF1	42	1
4_SCC152_H3K27ac_peak_1296_lociStitched	chr1	27019238	27028871	4	14	44771.3	1774.4	43	ARID1A		ARID1A	43	1
11_SCC152_H3K27ac_peak_590_lociStitched	chr1	10949787	10981102	11	22	47786.7	5223.34	44			C1orf127	44	1
26_SCC152_H3K27ac_peak_42571_lociStitched	chr3	141523985	141580142	26	52	50299.8	8154	45	GRK7	ATP1B3	ATP1B3	45	1
4_SCC152_H3K27ac_peak_54351_lociStitched	chr7	23505586	23516259	4	10	42891.6	1353.34	46	IGF2BP3	RPS2P32	IGF2BP3	46	1
5_SCC152_H3K27ac_peak_63286_lociStitched	chrX	39953687	39969525	5	14	42070.5	1145.09	47	BCOR		BCOR	47	1
22_SCC152_H3K27ac_peak_42727_lociStitched	chr3	149082911	149129258	22	48	48678.3	7832.64	48	TM4SF1	TM4SF18	TM4SF1	48	1
7_SCC152_H3K27ac_peak_19518_lociStitched	chr14	105553583	105564188	7	14	42287.4	1625.75	49		GPR132	GPR132	49	1
15_SCC152_H3K27ac_peak_5491_lociStitched	chr1	201300928	201328003	15	30	46368.6	6430.31	50	PKP1	TNNT2,LAD1,PKP1	TNNT2	50	1
16_SCC152_H3K27ac_peak_6527_lociStitched	chr1	226297469	226321219	16	32	44419.6	4840.25	51		H3F3A,LOC440926	LOC440926	51	1
12_SCC152_H3K27ac_peak_25318_lociStitched	chr17	39929048	39957566	12	30	43384.4	3944.04	52	JUP	FKBP10,HAP1,LEPREL4,JUP,NT5C3L,KLHL10	JUP	52	1
10_SCC152_H3K27ac_peak_6187_lociStitched	chr1	219331900	219362986	10	22	44692.3	5741.58	53	LYPLAL1		LYPLAL1	53	1
26_SCC152_H3K27ac_peak_43312_lociStitched	chr3	172310679	172344875	26	52	48414.7	9998.91	54			TNFSF10	54	1
5_SCC152_H3K27ac_peak_17118_lociStitched	chr13	95358428	95374826	5	12	38764.9	1265.93	55	SOX21		SOX21	55	1
7_SCC152_H3K27ac_peak_57248_lociStitched	chr8	28241282	28269785	7	18	41668.5	4449.32	56	ZNF395		ZNF395	56	1
19_SCC152_H3K27ac_peak_36796_lociStitched	chr20	34671008	34693962	19	38	41232.3	4159.26	57		EPB41L1,LOC647979	EPB41L1	57	1
24_SCC152_H3K27ac_peak_37536_lociStitched	chr20	52397019	52445771	24	48	44261.9	7312.8	58		SUMO1P1	SUMO1P1	58	1
19_SCC152_H3K27ac_peak_43445_lociStitched	chr3	177307639	177358122	19	38	52492.2	15543.7	59			TBL1XR1	59	1
15_SCC152_H3K27ac_peak_43257_lociStitched	chr3	172050856	172074342	15	30	45485.3	8600.57	60	FNDC3B		GHSR	60	1
12_SCC152_H3K27ac_peak_1309_lociStitched	chr1	27180238	27195019	12	30	39073.6	2626.58	61	SFN,ZDHHC18	GPN2,GPATCH3,NR0B2	SFN	61	1
18_SCC152_H3K27ac_peak_58500_lociStitched	chr8	101836440	101881538	18	36	44218.6	8090.58	62			YWHAZ	62	1
20_SCC152_H3K27ac_peak_6552_lociStitched	chr1	226864187	226911930	20	40	46105.4	10646.7	63	ITPKB		ITPKB	63	1
4_SCC152_H3K27ac_peak_26132_lociStitched	chr17	59486216	59493819	4	14	36753.7	1370.06	64	C17orf82,TBX2	TBX4	C17orf82	64	1
13_SCC152_H3K27ac_peak_11497_lociStitched	chr11	65169050	65203544	13	28	38291.8	2963.03	65	FRMD8,NEAT1	TIGD3,SLC25A45,MIR612	NEAT1	65	1
3_SCC152_H3K27ac_peak_44418_lociStitched	chr3	196723516	196729497	3	6	37863.9	2646.59	66	MFI2	PIGZ,MFI2	MFI2	66	1
28_SCC152_H3K27ac_peak_62364_lociStitched	chr9	134225477	134308144	28	56	46566.3	11391.5	67	BAT2L1		BAT2L1	67	1
25_SCC152_H3K27ac_peak_58556_lociStitched	chr8	102436365	102486843	25	50	43830	8768.03	68		GRHL2	GRHL2	68	1
18_SCC152_H3K27ac_peak_6345_lociStitched	chr1	221961453	222013678	18	36	45696.9	10930.7	69		DUSP10	DUSP10	69	1
20_SCC152_H3K27ac_peak_5550_lociStitched	chr1	201977082	202054089	20	50	46473.7	12174.8	70	ELF3	GPR37L1,RNPEP,ELF3	ELF3	70	1
15_SCC152_H3K27ac_peak_4536_lociStitched	chr1	159900682	159931188	15	34	40734.7	6488.63	71	SLAMF9,IGSF9	TAGLN2,CCDC19	IGSF9	71	1
6_SCC152_H3K27ac_peak_8650_lociStitched	chr10	77156166	77170698	6	22	35453.7	1479.36	72	NCRNA00245,ZNF503		NCRNA00245	72	1
12_SCC152_H3K27ac_peak_33969_lociStitched	chr2	129124675	129138742	12	24	36211.3	2312.61	73		HS6ST1	HS6ST1	73	1
47_SCC152_H3K27ac_peak_23228_lociStitched	chr16	68936087	69006814	47	94	39897.1	6231.05	74	TMCO7		TMCO7	74	1
11_SCC152_H3K27ac_peak_44077_lociStitched	chr3	189107545	189123011	11	22	39043.9	5405.37	75			TPRG1	75	1
11_SCC152_H3K27ac_peak_5957_lociStitched	chr1	210466233	210495245	11	22	39923.4	6405.85	76		HHAT	HHAT	76	1
13_SCC152_H3K27ac_peak_988_lociStitched	chr1	22259860	22299972	13	32	39045	5615.68	77	HSPG2	CELA3A,CELA3B	HSPG2	77	1
17_SCC152_H3K27ac_peak_37480_lociStitched	chr20	52195308	52239945	17	38	37486.2	4521.73	78	ZNF217		ZNF217	78	1
15_SCC152_H3K27ac_peak_26615_lociStitched	chr17	73675666	73697097	15	30	35866.9	3446.1	79	SAP30BP	RECQL5,LOC643008,LOC100130933,ITGB4	SAP30BP	79	1
21_SCC152_H3K27ac_peak_43296_lociStitched	chr3	172254785	172287489	21	42	43604.2	11466	80		TNFSF10	TNFSF10	80	1
15_SCC152_H3K27ac_peak_43997_lociStitched	chr3	188549025	188573229	15	30	39442.8	7675.09	81	LPP		TPRG1	81	1
29_SCC152_H3K27ac_peak_32605_lociStitched	chr2	60726825	60776830	29	58	38858.9	7155.72	82	BCL11A		BCL11A	82	1
14_SCC152_H3K27ac_peak_34675_lociStitched	chr2	178125392	178160224	14	38	34549.9	3061.73	83	NFE2L2,LOC100130691	HNRNPA3,MIR3128,NFE2L2	NFE2L2	83	1
29_SCC152_H3K27ac_peak_5091_lociStitched	chr1	180530719	180584310	29	58	43060.4	11854.3	84		XPR1	XPR1	84	1
21_SCC152_H3K27ac_peak_38977_lociStitched	chr22	25506435	25550821	21	42	35100.4	3928.16	85	KIAA1671	CRYBB3	CRYBB3	85	1
19_SCC152_H3K27ac_peak_4058_lociStitched	chr1	151521249	151559153	19	38	37960.9	7467.09	86	TUFT1	TUFT1,CGN,SNX27,MIR554	MIR554	86	1
5_SCC152_H3K27ac_peak_40893_lociStitched	chr3	48463323	48477269	5	14	32462.1	2303.88	87	PLXNB1,CCDC51	CCDC72,ATRIP,FBXW12,TREX1	PLXNB1	87	1
19_SCC152_H3K27ac_peak_12705_lociStitched	chr11	119551090	119572990	19	38	32396.7	2257.89	88	PVRL1		PVRL1	88	1
18_SCC152_H3K27ac_peak_62502_lociStitched	chr9	137247818	137277381	18	36	35153.4	5253.35	89	RXRA		RXRA	89	1
9_SCC152_H3K27ac_peak_29288_lociStitched	chr19	13953465	13973005	9	18	32649.4	2761	90		MIR181C,ZSWIM4,MIR27A,MIR24-2,MIR23A,MIR181D,CC2D1A,NANOS3,C19orf57,LOC284454	MIR23A	90	1
26_SCC152_H3K27ac_peak_37250_lociStitched	chr20	48432015	48468606	26	52	35442	5613.06	91	SLC9A8		SLC9A8	91	1
7_SCC152_H3K27ac_peak_28501_lociStitched	chr19	1244984	1266367	7	16	32106.6	2418.42	92	MIDN	CIRBP,C19orf23,ATP5D,STK11,C19orf26,EFNA2,C19orf24	MIDN	92	1
11_SCC152_H3K27ac_peak_18820_lociStitched	chr14	77413494	77431521	11	22	31785.2	2172.25	93			C14orf4	93	1
5_SCC152_H3K27ac_peak_30281_lociStitched	chr19	42772272	42785297	5	10	31636.4	2086.61	94		CIC,MEGF8,PAFAH1B3,PRR19,TMEM145,ZNF526,ERF,GSK3A	CIC	94	1
10_SCC152_H3K27ac_peak_44351_lociStitched	chr3	195835244	195865982	10	20	39252.4	9777.76	95		TFRC,LOC401109	LOC401109	95	1
7_SCC152_H3K27ac_peak_44292_lociStitched	chr3	194839681	194852388	7	14	34913.8	5845.22	96	C3orf21		C3orf21	96	1
19_SCC152_H3K27ac_peak_1142_lociStitched	chr1	24690790	24716502	19	38	32715.9	4453.32	97	C1orf201,GRHL3	GRHL3,NIPAL3	C1orf201	97	1
28_SCC152_H3K27ac_peak_36276_lociStitched	chr20	10598155	10650917	28	56	38394.9	10146.1	98	C20orf94,JAG1		JAG1	98	1
7_SCC152_H3K27ac_peak_10979_lociStitched	chr11	44748329	44763230	7	14	30326.5	2089.12	99		TSPAN18	TSPAN18	99	1
8_SCC152_H3K27ac_peak_27253_lociStitched	chr18	3583255	3603451	8	22	30798.9	2661.83	100	FLJ35776,DLGAP1		FLJ35776	100	1
33_SCC152_H3K27ac_peak_9678_lociStitched	chr10	123044426	123099009	33	66	33328.4	5327.3	101			FGFR2	101	1
6_SCC152_H3K27ac_peak_35259_lociStitched	chr2	219252391	219271519	6	14	29635	1654.57	102	SLC11A1,CTDSP1,MIR26B	C2orf62,VIL1	CTDSP1	102	1
2_SCC152_H3K27ac_peak_60654_lociStitched	chr9	87280192	87287302	2	10	29201.5	1350.19	103	NTRK2		NTRK2	103	1
12_SCC152_H3K27ac_peak_406_lociStitched	chr1	9376160	9410392	12	24	33694.6	5843.4	104	SPSB1		SPSB1	104	1
10_SCC152_H3K27ac_peak_61059_lociStitched	chr9	97763305	97784086	10	20	31159	3410.16	105	C9orf3		MIR23B	105	1
32_SCC152_H3K27ac_peak_47788_lociStitched	chr5	73327521	73381837	32	64	35120.7	8082.22	106			RGNEF	106	1
7_SCC152_H3K27ac_peak_33025_lociStitched	chr2	74202850	74215019	7	14	28592.3	1664.72	107		DGUOK	DGUOK	107	1
23_SCC152_H3K27ac_peak_26167_lociStitched	chr17	59628884	59659589	23	46	30701.9	3967.09	108		NACA2	NACA2	108	1
12_SCC152_H3K27ac_peak_57566_lociStitched	chr8	48286271	48297281	12	24	28717.4	2067.68	109	KIAA0146		KIAA0146	109	1
19_SCC152_H3K27ac_peak_61038_lociStitched	chr9	97674265	97694152	19	38	30516.6	4066.89	110	C9orf3		MIR2278	110	1
14_SCC152_H3K27ac_peak_2204_lociStitched	chr1	44300849	44334161	14	28	31926.2	5566.44	111	ST3GAL3		ARTN	111	1
30_SCC152_H3K27ac_peak_31499_lociStitched	chr2	17746037	17803361	30	60	33666.4	7543.84	112	VSNL1	RAD51AP2	VSNL1	112	1
2_SCC152_H3K27ac_peak_3038_lociStitched	chr1	87797222	87804328	2	4	27311.2	1451.05	113	LMO4		LMO4	113	1
13_SCC152_H3K27ac_peak_1385_lociStitched	chr1	27831524	27854429	13	26	29439.8	3623.57	114		WASF2	WASF2	114	1
13_SCC152_H3K27ac_peak_15069_lociStitched	chr12	86226663	86271332	13	38	29789.8	4149.75	115	RASSF9,NTS		RASSF9	115	1
23_SCC152_H3K27ac_peak_52862_lociStitched	chr6	134683724	134728955	23	46	32670.4	7119.36	116		SGK1	SGK1	116	1
5_SCC152_H3K27ac_peak_4092_lociStitched	chr1	151960945	151974210	5	14	28694.8	3287.07	117	S100A10	S100A11	S100A10	117	1
4_SCC152_H3K27ac_peak_30125_lociStitched	chr19	39889247	39900319	4	10	27198.4	1908.81	118	ZFP36,MED29	PLEKHG2,SUPT5H,RPS16,PAF1	ZFP36	118	1
8_SCC152_H3K27ac_peak_25459_lociStitched	chr17	41608558	41632516	8	24	28814.3	3576.93	119	ETV4	DHX8	ETV4	119	1
6_SCC152_H3K27ac_peak_4098_lociStitched	chr1	152018633	152024861	6	12	26834	1602.46	120		TCHHL1,S100A11	S100A11	120	1
20_SCC152_H3K27ac_peak_57635_lociStitched	chr8	49606414	49626618	20	40	29206.9	4008.47	121		EFCAB1	EFCAB1	121	1
11_SCC152_H3K27ac_peak_42959_lociStitched	chr3	159482692	159507223	11	22	35133.3	9947.32	122	IQCJ-SCHIP1,SCHIP1		SCHIP1	122	1
15_SCC152_H3K27ac_peak_39390_lociStitched	chr22	38276497	38308195	15	34	27342.7	2164.97	123	MICALL1,EIF3L	ANKRD54,C22orf23,POLR2F,MIR658,MIR659	MICALL1	123	1
5_SCC152_H3K27ac_peak_4826_lociStitched	chr1	169064358	169079379	5	14	28362.7	3600.53	124	ATP1B1		ATP1B1	124	1
11_SCC152_H3K27ac_peak_7055_lociStitched	chr1	244521784	244536746	11	22	27393.9	2658.75	125	C1orf100		C1orf100	125	1
12_SCC152_H3K27ac_peak_47835_lociStitched	chr5	73925427	73944300	12	30	28015.1	3289.56	126	ENC1	HEXB	ENC1	126	1
10_SCC152_H3K27ac_peak_59036_lociStitched	chr8	128216510	128235679	10	20	28655.7	3944.98	127			POU5F1B	127	1
4_SCC152_H3K27ac_peak_27000_lociStitched	chr17	79361020	79370886	4	8	26390.6	1737.4	128		MIR3186,BAHCC1	BAHCC1	128	1
12_SCC152_H3K27ac_peak_5499_lociStitched	chr1	201429942	201450169	12	30	28967.1	4542.98	129	PHLDA3	CSRP1,RPS10P7,TNNI1	PHLDA3	129	1
22_SCC152_H3K27ac_peak_18010_lociStitched	chr14	51823944	51867545	22	44	29657.4	5336.76	130			FRMD6	130	1
5_SCC152_H3K27ac_peak_20757_lociStitched	chr15	70384035	70404029	5	14	26867.9	2625.21	131	TLE3	MIR629	TLE3	131	1
18_SCC152_H3K27ac_peak_1849_lociStitched	chr1	39623268	39658853	18	36	29741.9	5579.73	132	MACF1		MACF1	132	1
14_SCC152_H3K27ac_peak_4155_lociStitched	chr1	153242096	153266269	14	28	28894	4793.51	133		LOR,PGLYRP3	LOR	133	1
3_SCC152_H3K27ac_peak_43906_lociStitched	chr3	187459287	187468258	3	10	27924.9	3863.81	134	BCL6	RTP2,BCL6,LOC100131635	BCL6	134	1
11_SCC152_H3K27ac_peak_43862_lociStitched	chr3	185804724	185822167	11	22	30523.5	6473.1	135	ETV5		ETV5	135	1
9_SCC152_H3K27ac_peak_545_lociStitched	chr1	10692259	10704265	9	18	25921	2005	136	CASZ1		CASZ1	136	1
10_SCC152_H3K27ac_peak_35529_lociStitched	chr2	232469172	232488389	10	20	25727.7	1821.77	137		C2orf57	C2orf57	137	1
28_SCC152_H3K27ac_peak_32264_lociStitched	chr2	43629263	43665090	28	56	27941.5	4438.97	138	THADA		THADA	138	1
25_SCC152_H3K27ac_peak_47340_lociStitched	chr5	54847242	54906079	25	50	30771.8	7325.21	139		PPAP2A,RNF138P1	PPAP2A	139	1
12_SCC152_H3K27ac_peak_43723_lociStitched	chr3	183708905	183733162	12	24	30396.4	7029.68	140	ABCC5	HTR3D,HTR3C	ABCC5	140	1
18_SCC152_H3K27ac_peak_47726_lociStitched	chr5	72944750	72970927	18	36	27459.7	4135.97	141	RGNEF		RGNEF	141	1
10_SCC152_H3K27ac_peak_6341_lociStitched	chr1	221931128	221947470	10	20	26756.8	3443.26	142		DUSP10	DUSP10	142	1
9_SCC152_H3K27ac_peak_47241_lociStitched	chr5	52280813	52306845	9	22	27700.7	4428.04	143	ITGA2		ITGA2	143	1
17_SCC152_H3K27ac_peak_35240_lociStitched	chr2	219138136	219163295	17	42	25211.8	2128.45	144	TMBIM1,PNKD	AAMP,GPBAR1,PNKD	TMBIM1	144	1
10_SCC152_H3K27ac_peak_11263_lociStitched	chr11	62306512	62328843	10	28	25305.5	2322.42	145	AHNAK,EEF1G	TUT1,MTA2	AHNAK	145	1
27_SCC152_H3K27ac_peak_58990_lociStitched	chr8	125631710	125698349	27	54	35838.5	12901.3	146	MTSS1		MTSS1	146	1
4_SCC152_H3K27ac_peak_60013_lociStitched	chr9	33161497	33172361	4	14	24919.8	2038.09	147	B4GALT1		B4GALT1	147	1
6_SCC152_H3K27ac_peak_13295_lociStitched	chr12	12867214	12874610	6	18	23777.4	968.136	148	CDKN1B	APOLD1,MIR613,GPR19	CDKN1B	148	1
12_SCC152_H3K27ac_peak_29919_lociStitched	chr19	36618641	36660165	12	36	27978.9	5219.57	149	COX7A1,CAPNS1	ZNF565,CAPNS1,ZNF146,POLR2I,TBCB	COX7A1	149	1
7_SCC152_H3K27ac_peak_43271_lociStitched	chr3	172231185	172238482	7	14	26038.6	3374.13	150	TNFSF10	TNFSF10	TNFSF10	150	1
7_SCC152_H3K27ac_peak_37546_lociStitched	chr20	52480312	52489468	7	14	24431.9	1776.26	151		SUMO1P1	SUMO1P1	151	1
8_SCC152_H3K27ac_peak_44211_lociStitched	chr3	193545858	193562081	8	16	28834.8	6245.85	152			LOC100128023	152	1
14_SCC152_H3K27ac_peak_60903_lociStitched	chr9	95351325	95374369	14	28	26629.6	4159.44	153	CENPP	LOC100128361	LOC100128361	153	1
17_SCC152_H3K27ac_peak_2185_lociStitched	chr1	44196442	44234208	17	34	27784.4	5347.67	154	ST3GAL3	LOC100132774,ST3GAL3	ST3GAL3	154	1
31_SCC152_H3K27ac_peak_36132_lociStitched	chr20	5622108	5656368	31	62	27534.8	5159.56	155		GPCPD1	GPCPD1	155	1
20_SCC152_H3K27ac_peak_48383_lociStitched	chr5	111960050	111986013	20	40	26404.4	4112.54	156			APC	156	1
21_SCC152_H3K27ac_peak_48907_lociStitched	chr5	135029572	135060102	21	42	27376.3	5119.88	157		LOC340074	LOC340074	157	1
16_SCC152_H3K27ac_peak_43336_lociStitched	chr3	172390642	172426423	16	32	33322.8	11117.2	158	NCEH1	NCEH1,ECT2	NCEH1	158	1
19_SCC152_H3K27ac_peak_6721_lociStitched	chr1	232410941	232455593	19	38	37159.4	14954	159			SIPA1L2	159	1
8_SCC152_H3K27ac_peak_50705_lociStitched	chr6	21588292	21616346	8	20	24378.9	2182.6	160	SOX4		SOX4	160	1
4_SCC152_H3K27ac_peak_29766_lociStitched	chr19	33861612	33881722	4	14	25887.6	3714.32	161	CEBPG,PEPD		CEBPG	161	1
16_SCC152_H3K27ac_peak_15644_lociStitched	chr12	110298752	110327386	16	40	24948.8	2806.13	162	GLTP	TCHP,TRPV4	GLTP	162	1
14_SCC152_H3K27ac_peak_23436_lociStitched	chr16	73049860	73087628	14	34	26169.4	4207.36	163	ZFHX3	HTA	ZFHX3	163	1
6_SCC152_H3K27ac_peak_26935_lociStitched	chr17	77774780	77787566	6	12	23857.4	1935.8	164		CBX2,CBX4,CBX8	CBX8	164	1
10_SCC152_H3K27ac_peak_62587_lociStitched	chr9	139512661	139521670	10	20	23859.4	1943.24	165		EGFL7,MIR126	EGFL7	165	1
3_SCC152_H3K27ac_peak_10393_lociStitched	chr11	10919077	10923149	3	6	22965.3	1079.89	166		ZBED5,LOC729013	LOC729013	166	1
2_SCC152_H3K27ac_peak_7552_lociStitched	chr10	21806161	21817478	2	6	23274.5	1494.98	167	C10orf140	MLLT10,MIR1915,C10orf114	C10orf140	167	1
18_SCC152_H3K27ac_peak_2164_lociStitched	chr1	43999181	44030524	18	36	27049	5337.71	168	PTPRF		PTPRF	168	1
4_SCC152_H3K27ac_peak_26499_lociStitched	chr17	72749449	72758413	4	8	23086.8	1427.97	169	SLC9A3R1	CD300LF,NAT9,RAB37,TMEM104,MIR3615	SLC9A3R1	169	1
12_SCC152_H3K27ac_peak_6461_lociStitched	chr1	224914178	224937219	12	24	27068.6	5456.11	170	CNIH3		CNIH3	170	1
10_SCC152_H3K27ac_peak_56899_lociStitched	chr8	11703848	11735307	10	24	25988.3	4416.84	171	CTSB	FDFT1	CTSB	171	1
11_SCC152_H3K27ac_peak_26476_lociStitched	chr17	71608668	71622498	11	22	23558	2071.73	172	SDK2		SDK2	172	1
24_SCC152_H3K27ac_peak_13527_lociStitched	chr12	24630992	24654190	24	48	24116.6	2751.28	173	SOX5		SOX5	173	1
10_SCC152_H3K27ac_peak_35871_lociStitched	chr2	241377986	241392401	10	20	22460	1182.03	174	PP14571,GPC1	MIR149	GPC1	174	1
4_SCC152_H3K27ac_peak_27338_lociStitched	chr18	9608357	9619363	4	10	23014.6	1792.88	175	PPP4R1	PPP4R1	PPP4R1	175	1
25_SCC152_H3K27ac_peak_33852_lociStitched	chr2	122238014	122285144	25	50	26543.6	5353.97	176	CLASP1	RNU4ATAC	RNU4ATAC	176	1
3_SCC152_H3K27ac_peak_60313_lociStitched	chr9	73026116	73034878	3	10	22638.4	1609.58	177	KLF9		KLF9	177	1
7_SCC152_H3K27ac_peak_7304_lociStitched	chr10	5581065	5593652	7	14	22772.4	1773.51	178		CALML5,CALML3	CALML3	178	1
33_SCC152_H3K27ac_peak_15216_lociStitched	chr12	92489950	92536798	33	66	25944.4	4984.63	179	BTG1		BTG1	179	1
8_SCC152_H3K27ac_peak_6809_lociStitched	chr1	234667415	234680716	8	16	24707.9	3749.55	180			TARBP1	180	1
25_SCC152_H3K27ac_peak_63117_lociStitched	chrX	23803883	23844798	25	50	23477	2557.19	181	SAT1	SAT1,ACOT9	SAT1	181	1
12_SCC152_H3K27ac_peak_52980_lociStitched	chr6	135078782	135108806	12	24	25322.2	4470.57	182			ALDH8A1	182	1
10_SCC152_H3K27ac_peak_26549_lociStitched	chr17	73110539	73131977	10	24	23590.4	2846.97	183	ARMC7,HN1,NT5C	SLC16A5,HN1,SUMO2	NT5C	183	1
7_SCC152_H3K27ac_peak_557_lociStitched	chr1	10752476	10759096	7	14	21960.5	1335.92	184	CASZ1		CASZ1	184	1
9_SCC152_H3K27ac_peak_60388_lociStitched	chr9	74760523	74783611	9	20	23916.9	3393.94	185	GDA		GDA	185	1
28_SCC152_H3K27ac_peak_8765_lociStitched	chr10	82218345	82266623	28	56	24501.1	4147.08	186	TSPAN14	C10orf58,SH2D4B	TSPAN14	186	1
6_SCC152_H3K27ac_peak_63593_lociStitched	chrX	49011947	49033300	6	18	21989.3	1637.78	187	MAGIX,PLP2,PRICKLE3	SYP,GPKOW	MAGIX	187	1
7_SCC152_H3K27ac_peak_56944_lociStitched	chr8	17584487	17595988	7	14	22445.4	2119.63	188	MTUS1	MTUS1	MTUS1	188	1
14_SCC152_H3K27ac_peak_47275_lociStitched	chr5	52614493	52636418	14	28	24328	4003.51	189			FST	189	1
13_SCC152_H3K27ac_peak_43621_lociStitched	chr3	182082537	182106822	13	26	27978.7	7839.2	190			ATP11B	190	1
4_SCC152_H3K27ac_peak_62249_lociStitched	chr9	132094353	132098184	4	8	20782.8	762.369	191		C9orf106	C9orf106	191	1
15_SCC152_H3K27ac_peak_5446_lociStitched	chr1	201223320	201246414	15	30	25636.6	5632.63	192		PKP1	PKP1	192	1
2_SCC152_H3K27ac_peak_25654_lociStitched	chr17	46122991	46129129	2	8	21087.7	1084.58	193	NFE2L1	COPZ2,CBX1,MIR152	NFE2L1	193	1
2_SCC152_H3K27ac_peak_43771_lociStitched	chr3	184283395	184286571	2	4	21298.6	1315.82	194	EPHB3		EPHB3	194	1
7_SCC152_H3K27ac_peak_59870_lociStitched	chr9	20312463	20321693	7	14	21779.1	1947.53	195			MLLT3	195	1
12_SCC152_H3K27ac_peak_30503_lociStitched	chr19	45943003	45959351	12	24	21994.6	2221.69	196		PPM1N,FOSB,ERCC1,PPP1R13L,RTN2,CD3EAP	FOSB	196	1
23_SCC152_H3K27ac_peak_18509_lociStitched	chr14	68592083	68636959	23	46	24740.1	4967.77	197	RAD51L1		RAD51L1	197	1
14_SCC152_H3K27ac_peak_6903_lociStitched	chr1	236071945	236096925	14	28	24767.7	5138.39	198		LYST	LYST	198	1
9_SCC152_H3K27ac_peak_47174_lociStitched	chr5	42982971	43008132	9	18	23523	3902.47	199		LOC648987,LOC153684,C5orf39	LOC648987	199	1
15_SCC152_H3K27ac_peak_37425_lociStitched	chr20	51459397	51484070	15	30	24295.5	4687.87	200			TSHZ2	200	1
5_SCC152_H3K27ac_peak_16108_lociStitched	chr12	123863943	123877306	5	14	20978.6	1400.44	201	SETD8	SBNO1,RILPL2	SETD8	201	1
12_SCC152_H3K27ac_peak_19890_lociStitched	chr15	41128401	41171688	12	38	24448.5	4930.39	202	SPINT1,RHOV	VPS18,ZFYVE19,DLL4,PPP1R14D,DNAJC17	SPINT1	202	1
34_SCC152_H3K27ac_peak_41276_lociStitched	chr3	54850445	54904173	34	68	24360.3	4873.13	203	CACNA2D3		LRTM1	203	1
10_SCC152_H3K27ac_peak_19635_lociStitched	chr15	31684324	31701735	10	20	21701.1	2299.99	204			KLF13	204	1
3_SCC152_H3K27ac_peak_29779_lociStitched	chr19	34310762	34312590	3	6	19676.8	360.664	205		KCTD15	KCTD15	205	1
12_SCC152_H3K27ac_peak_61816_lociStitched	chr9	124040475	124052142	12	24	21735.6	2539.91	206	GSN	GSN	GSN	206	1
17_SCC152_H3K27ac_peak_35544_lociStitched	chr2	232506912	232545585	17	34	22062.9	2885.01	207		C2orf57,PTMA,MIR1244-2	PTMA	207	1
11_SCC152_H3K27ac_peak_533_lociStitched	chr1	10645682	10661686	11	22	21965.5	2874.32	208	PEX14		PEX14	208	1
19_SCC152_H3K27ac_peak_52531_lociStitched	chr6	113951209	113975971	19	38	21973.8	3053.15	209			MARCKS	209	1
5_SCC152_H3K27ac_peak_6837_lociStitched	chr1	234857942	234867732	5	10	21342.2	2454.35	210			NCRNA00184	210	1
10_SCC152_H3K27ac_peak_455_lociStitched	chr1	9893779	9904165	10	20	20699.3	1857.02	211		CLSTN1	CLSTN1	211	1
15_SCC152_H3K27ac_peak_41907_lociStitched	chr3	111457882	111482501	15	30	21955.2	3188.16	212	PLCXD2,PHLDB2		PHLDB2	212	1
15_SCC152_H3K27ac_peak_38528_lociStitched	chr21	44922772	44942800	15	30	21351.9	2589.62	213		C21orf84	C21orf84	213	1
9_SCC152_H3K27ac_peak_55187_lociStitched	chr7	73237303	73270190	9	26	22175.7	3627.44	214	CLDN4,WBSCR27	WBSCR28	WBSCR27	214	1
13_SCC152_H3K27ac_peak_18934_lociStitched	chr14	81777446	81796662	13	26	20968.5	2461.57	215	STON2		STON2	215	1
8_SCC152_H3K27ac_peak_47585_lociStitched	chr5	66296639	66312748	8	16	21117.3	2657.99	216	MAST4		MAST4	216	1
23_SCC152_H3K27ac_peak_52951_lociStitched	chr6	134978503	135011652	23	46	23575.6	5184.5	217			ALDH8A1	217	1
18_SCC152_H3K27ac_peak_8297_lociStitched	chr10	63832308	63856196	18	36	21382.1	3181.88	218	ARID5B		ARID5B	218	1
12_SCC152_H3K27ac_peak_26084_lociStitched	chr17	57906250	57930600	12	30	20868	2717.46	219	MIR21,TMEM49	RPS6KB1,TUBD1	MIR21	219	1
15_SCC152_H3K27ac_peak_32758_lociStitched	chr2	64856322	64899973	15	34	23689.4	5582.96	220	SERTAD2	LOC339807	SERTAD2	220	1
11_SCC152_H3K27ac_peak_29349_lociStitched	chr19	14636009	14664865	11	30	22164.3	4077.35	221	TECR,MIR639	GIPC1,DNAJB1,NDUFB7,CLEC17A,LOC100130932,PTGER1	TECR	221	1
6_SCC152_H3K27ac_peak_7218_lociStitched	chr10	3818395	3833212	6	18	20014.8	1936.58	222	KLF6	KLF6	KLF6	222	1
3_SCC152_H3K27ac_peak_4215_lociStitched	chr1	153744862	153756526	3	14	20534.5	2465.77	223	SLC27A3,INTS3		SLC27A3	223	1
24_SCC152_H3K27ac_peak_8279_lociStitched	chr10	63778564	63816788	24	48	23094.9	5045.57	224	ARID5B		ARID5B	224	1
12_SCC152_H3K27ac_peak_178_lociStitched	chr1	3616056	3634477	12	24	20926.3	2895.78	225	TP73	KIAA0495,CCDC27,WDR8	TP73	225	1
11_SCC152_H3K27ac_peak_40105_lociStitched	chr3	10230735	10241391	11	22	20217.6	2216.45	226	IRAK2	TATDN2,VHL	IRAK2	226	1
12_SCC152_H3K27ac_peak_4494_lociStitched	chr1	157978863	157999331	12	24	22269.2	4331.03	227	KIRREL		KIRREL	227	1
15_SCC152_H3K27ac_peak_43973_lociStitched	chr3	188373395	188392187	15	30	23790.7	5880.02	228	LPP		LPP	228	1
12_SCC152_H3K27ac_peak_6760_lociStitched	chr1	232756205	232766343	12	24	20188.8	2321.6	229			SIPA1L2	229	1
7_SCC152_H3K27ac_peak_38545_lociStitched	chr21	45188023	45203042	7	24	19331	1513.92	230	CSTB	LOC284837,PDXK,RRP1	CSTB	230	1
9_SCC152_H3K27ac_peak_1631_lociStitched	chr1	33219284	33226103	9	18	19173.7	1373.35	231	KIAA1522	KIAA1522	KIAA1522	231	1
14_SCC152_H3K27ac_peak_59052_lociStitched	chr8	128251738	128278372	14	28	23307.4	5515.9	232			POU5F1B	232	1
21_SCC152_H3K27ac_peak_39660_lociStitched	chr22	43108081	43164093	21	44	21335	3556.76	233	A4GALT		A4GALT	233	1
7_SCC152_H3K27ac_peak_61015_lociStitched	chr9	97561642	97580436	7	14	21090.6	3352.85	234	C9orf3,MIR2278		MIR2278	234	1
5_SCC152_H3K27ac_peak_60465_lociStitched	chr9	77699196	77710493	5	16	19768.6	2130.61	235	C9orf95,OSTF1	C9orf95	OSTF1	235	1
10_SCC152_H3K27ac_peak_32910_lociStitched	chr2	70335905	70374396	10	20	21724.3	4145.48	236	LOC100133985	PCBP1,LOC400960,C2orf42	LOC100133985	236	1
21_SCC152_H3K27ac_peak_44446_lociStitched	chr3	197206071	197243870	21	42	32242.5	14681.1	237	BDH1		BDH1	237	1
5_SCC152_H3K27ac_peak_21864_lociStitched	chr16	2201290	2213655	5	20	19310.4	1759.54	238	TRAF7,SNORD60,RAB26	CASKIN1,MIR3180-5,MLST8,PKD1,C16orf79	TRAF7	238	1
8_SCC152_H3K27ac_peak_47712_lociStitched	chr5	72834889	72841478	8	16	18795.1	1307.26	239		BTF3,UTP15,ANKRA2	ANKRA2	239	1
17_SCC152_H3K27ac_peak_27102_lociStitched	chr17	80234429	80256084	17	34	20702.2	3215.77	240		SLC16A3,SECTM1,CSNK1D,CD7	CSNK1D	240	1
11_SCC152_H3K27ac_peak_13064_lociStitched	chr12	6380746	6390193	11	22	18870.4	1394.38	241		PLEKHG6	PLEKHG6	241	1
13_SCC152_H3K27ac_peak_38349_lociStitched	chr21	40275299	40293821	13	26	20613.1	3191.34	242			ETS2	242	1
3_SCC152_H3K27ac_peak_44327_lociStitched	chr3	195159983	195173026	3	10	22040.1	4858.52	243	ACAP2		ACAP2	243	1
20_SCC152_H3K27ac_peak_1901_lociStitched	chr1	40283333	40318461	20	40	22994.8	5813.68	244	TRIT1	OXCT2,BMP8B,MYCL1	BMP8B	244	1
13_SCC152_H3K27ac_peak_34396_lociStitched	chr2	160906763	160928625	13	32	19103	1982.88	245	PLA2R1		PLA2R1	245	1
12_SCC152_H3K27ac_peak_18482_lociStitched	chr14	68505791	68516634	12	24	18091.5	975.87	246	RAD51L1		RAD51L1	246	1
21_SCC152_H3K27ac_peak_60245_lociStitched	chr9	38024136	38066632	21	42	23963.5	6909.85	247	SHB		SHB	247	1
13_SCC152_H3K27ac_peak_59398_lociStitched	chr8	144952377	144980857	13	26	22114.7	5083.68	248		PUF60,PLEC,MIR661,EPPK1,NRBP2	EPPK1	248	1
9_SCC152_H3K27ac_peak_41109_lociStitched	chr3	52073871	52087237	9	18	18220.5	1315.21	249	DUSP7	C3orf74,RPL29	DUSP7	249	1
10_SCC152_H3K27ac_peak_38958_lociStitched	chr22	25348417	25388224	10	20	19780.1	2886.01	250		KIAA1671,TMEM211	TMEM211	250	1
9_SCC152_H3K27ac_peak_43537_lociStitched	chr3	181398828	181418621	9	18	23035.1	6236.77	251	SOX2OT	SOX2	SOX2	251	1
7_SCC152_H3K27ac_peak_24237_lociStitched	chr17	7737359	7748618	7	18	18058.3	1297.04	252	KDM6B	LSMD1,CYB5D1,CHD3,TMEM88	KDM6B	252	1
13_SCC152_H3K27ac_peak_23272_lociStitched	chr16	69019349	69032870	13	26	18335.8	1576.55	253	TMCO7		HAS3	253	1
5_SCC152_H3K27ac_peak_1070_lociStitched	chr1	23881218	23894921	5	22	19133.5	2403.51	254	ID3	E2F2	ID3	254	1
8_SCC152_H3K27ac_peak_59178_lociStitched	chr8	134335236	134354247	8	16	20102.2	3421.98	255		NDRG1	NDRG1	255	1
3_SCC152_H3K27ac_peak_5494_lociStitched	chr1	201366034	201376670	3	10	19262.9	2606.88	256	TNNI1,LAD1	TNNT2	LAD1	256	1
8_SCC152_H3K27ac_peak_26979_lociStitched	chr17	79061427	79071693	8	16	18564	1919.74	257	BAIAP2	MIR3065,MIR1250,MIR657,MIR338	MIR657	257	1
4_SCC152_H3K27ac_peak_31279_lociStitched	chr2	8817141	8825873	4	12	17705	1078.4	258	ID2		ID2	258	1
9_SCC152_H3K27ac_peak_6451_lociStitched	chr1	224686204	224694125	9	18	18299.1	1716.48	259			WDR26	259	1
4_SCC152_H3K27ac_peak_1264_lociStitched	chr1	26602517	26611619	4	12	18278.6	1704.8	260	UBXN11,SH3BGRL3,CCDC21	CD52,UBXN11	SH3BGRL3	260	1
14_SCC152_H3K27ac_peak_33553_lociStitched	chr2	109532043	109561055	14	28	20824.8	4412.73	261	EDAR		EDAR	261	1
20_SCC152_H3K27ac_peak_9293_lociStitched	chr10	105495656	105545182	20	40	20508.7	4160.18	262	SH3PXD2A		SH3PXD2A	262	1
5_SCC152_H3K27ac_peak_43716_lociStitched	chr3	183631521	183645065	5	10	20191.4	3855.98	263	ABCC5	PARL	PARL	263	1
16_SCC152_H3K27ac_peak_4359_lociStitched	chr1	155728969	155762858	16	32	21004.4	4849.52	264	GON4L	MSTO2P	MSTO2P	264	1
14_SCC152_H3K27ac_peak_20416_lociStitched	chr15	60663464	60686276	14	28	19011.5	2913.09	265	ANXA2	ANXA2	ANXA2	265	1
9_SCC152_H3K27ac_peak_27179_lociStitched	chr17	80832048	80853178	9	18	19325.5	3323.75	266	TBCD	ZNF750	ZNF750	266	1
8_SCC152_H3K27ac_peak_35051_lociStitched	chr2	206632052	206640807	8	16	17049.5	1051.48	267	NRP2		NRP2	267	1
2_SCC152_H3K27ac_peak_5762_lociStitched	chr1	205599101	205604857	2	10	17118.9	1140.84	268	ELK4	SLC45A3	ELK4	268	1
6_SCC152_H3K27ac_peak_5928_lociStitched	chr1	209989291	209998651	6	12	17801.8	1847.66	269		C1orf74,C1orf107,IRF6	C1orf107	269	1
6_SCC152_H3K27ac_peak_37352_lociStitched	chr20	49340953	49361003	6	18	18816.9	2867.15	270	PARD6B		PARD6B	270	1
5_SCC152_H3K27ac_peak_52584_lociStitched	chr6	114661531	114667021	5	10	16624.3	705.465	271			HS3ST5	271	1
10_SCC152_H3K27ac_peak_18800_lociStitched	chr14	77379853	77397126	10	20	17970.8	2112.49	272			C14orf166B	272	1
16_SCC152_H3K27ac_peak_38421_lociStitched	chr21	43033089	43055378	16	32	18664.8	2824.02	273		NCRNA00111	NCRNA00111	273	1
9_SCC152_H3K27ac_peak_58474_lociStitched	chr8	101688785	101695320	9	18	17346.5	1557.29	274		SNX31,PABPC1	SNX31	274	1
11_SCC152_H3K27ac_peak_16150_lociStitched	chr12	124994159	125009683	11	22	17688	1963.79	275	NCOR2	NCOR2	NCOR2	275	1
18_SCC152_H3K27ac_peak_21494_lociStitched	chr15	92483625	92510954	18	36	19387.2	3670.28	276	SLCO3A1		SLCO3A1	276	1
10_SCC152_H3K27ac_peak_62131_lociStitched	chr9	130717002	130733299	10	20	18546	2964.42	277	FAM102A	FAM102A,PIP5KL1,ST6GALNAC4,DPM2	FAM102A	277	1
17_SCC152_H3K27ac_peak_18872_lociStitched	chr14	78057146	78080391	17	34	17687.1	2208.28	278	SPTLC2		SPTLC2	278	1
11_SCC152_H3K27ac_peak_60696_lociStitched	chr9	88016032	88027618	11	22	17460.1	1984.68	279			AGTPBP1	279	1
16_SCC152_H3K27ac_peak_18468_lociStitched	chr14	68408432	68443976	16	32	19008.9	3664.59	280	RAD51L1		RAD51L1	280	1
12_SCC152_H3K27ac_peak_32249_lociStitched	chr2	43560503	43578124	12	24	17555.8	2236.1	281	THADA		LOC100129726	281	1
17_SCC152_H3K27ac_peak_26001_lociStitched	chr17	56460970	56491920	17	34	19204.5	3964.7	282	RNF43	SUPT4H1	RNF43	282	1
18_SCC152_H3K27ac_peak_61931_lociStitched	chr9	127319372	127367632	18	36	22402.3	7190.74	283	NR6A1	NR5A1	NR5A1	283	1
25_SCC152_H3K27ac_peak_29975_lociStitched	chr19	38443956	38477107	25	50	19390	4253.27	284	SIPA1L3	WDR87	SIPA1L3	284	1
7_SCC152_H3K27ac_peak_30693_lociStitched	chr19	47362499	47379239	7	14	16907.4	1856.47	285		GRLF1,SNAR-E,AP2S1	AP2S1	285	1
11_SCC152_H3K27ac_peak_33658_lociStitched	chr2	112768724	112792415	11	22	17526.6	2532.57	286	MERTK	TMEM87B	TMEM87B	286	1
19_SCC152_H3K27ac_peak_41226_lociStitched	chr3	54578736	54609705	19	38	17562.5	2576.62	287	CACNA2D3		ESRG	287	1
19_SCC152_H3K27ac_peak_10336_lociStitched	chr11	9823286	9863232	19	38	21850.5	6898.67	288	LOC283104,SBF2	LOC440028	LOC440028	288	1
7_SCC152_H3K27ac_peak_31825_lociStitched	chr2	28599297	28612272	7	14	16758.5	2009.83	289		FOSL2	FOSL2	289	1
4_SCC152_H3K27ac_peak_29796_lociStitched	chr19	34397534	34406782	4	8	16420.7	1752.5	290			KCTD15	290	1
8_SCC152_H3K27ac_peak_43846_lociStitched	chr3	185661291	185678826	8	16	19683	5025.53	291		TRA2B,LOC344887	TRA2B	291	1
9_SCC152_H3K27ac_peak_58116_lociStitched	chr8	80870908	80894509	9	18	18288.4	3641.63	292	MRPS28		MRPS28	292	1
9_SCC152_H3K27ac_peak_49247_lociStitched	chr5	145403661	145428723	9	18	18583.5	4002.4	293	SH3RF2		PLAC8L1	293	1
11_SCC152_H3K27ac_peak_57532_lociStitched	chr8	42342362	42361257	11	22	17767	3198.92	294	SLC20A2	C8orf40	C8orf40	294	1
5_SCC152_H3K27ac_peak_6648_lociStitched	chr1	228580883	228600174	5	16	18544.4	4031.82	295	TRIM17,TRIM11	HIST3H2A,HIST3H3,HIST3H2BB	TRIM11	295	1
5_SCC152_H3K27ac_peak_57893_lociStitched	chr8	68251769	68261865	5	12	16018.3	1512.38	296	ARFGEF1		ARFGEF1	296	1
10_SCC152_H3K27ac_peak_49438_lociStitched	chr5	149865967	149897703	10	28	18663.9	4160.59	297	NDST1	RPS14	NDST1	297	1
7_SCC152_H3K27ac_peak_26228_lociStitched	chr17	61915751	61928955	7	18	16703.1	2210.35	298	SMARCD2	CSH2,CSH1,PSMC5,TCAM1P,FTSJ3,GH2	SMARCD2	298	1
15_SCC152_H3K27ac_peak_18055_lociStitched	chr14	52029823	52045553	15	30	16150	1804.23	299	FRMD6		FRMD6	299	1
7_SCC152_H3K27ac_peak_42776_lociStitched	chr3	151022037	151038572	7	24	16829.3	2488.52	300	MED12L,GPR87	P2RY13,P2RY14,P2RY12	GPR87	300	1
5_SCC152_H3K27ac_peak_58626_lociStitched	chr8	103819305	103823585	5	10	15426.4	1087.98	301			AZIN1	301	1
5_SCC152_H3K27ac_peak_36104_lociStitched	chr20	5582764	5594650	5	18	16151.9	1850.65	302	GPCPD1		GPCPD1	302	1
12_SCC152_H3K27ac_peak_43397_lociStitched	chr3	176891940	176912070	12	24	19604.6	5318.35	303	TBL1XR1		TBL1XR1	303	1
11_SCC152_H3K27ac_peak_28278_lociStitched	chr18	61346854	61373516	11	36	16847.7	2570.22	304	SERPINB11	SERPINB7,SERPINB4,SERPINB3	SERPINB11	304	1
4_SCC152_H3K27ac_peak_17826_lociStitched	chr14	35855140	35876653	4	16	16517.7	2293.29	305	NFKBIA		NFKBIA	305	1
7_SCC152_H3K27ac_peak_49238_lociStitched	chr5	145357300	145365343	7	14	15402.3	1273.21	306	SH3RF2		SH3RF2	306	1
17_SCC152_H3K27ac_peak_23205_lociStitched	chr16	68765675	68790799	17	36	16601.9	2514.91	307	CDH1		CDH1	307	1
8_SCC152_H3K27ac_peak_60915_lociStitched	chr9	95407917	95419320	8	16	16072.5	1993.24	308	IPPK	LOC100128361	IPPK	308	1
5_SCC152_H3K27ac_peak_38518_lociStitched	chr21	44861254	44876298	5	18	16370.9	2342.35	309	C21orf125	SIK1,C21orf84	C21orf125	309	1
14_SCC152_H3K27ac_peak_12215_lociStitched	chr11	95177245	95196770	14	28	15948	1936.88	310			SESN3	310	1
17_SCC152_H3K27ac_peak_14798_lociStitched	chr12	66328627	66353174	17	34	17043	3034.01	311	HMGA2		RPSAP52	311	1
9_SCC152_H3K27ac_peak_5993_lociStitched	chr1	210920262	210931641	9	18	16657.7	2658.13	312	KCNH1		KCNH1	312	1
6_SCC152_H3K27ac_peak_4167_lociStitched	chr1	153483767	153499276	6	12	16700.1	2754.4	313		S100A4,S100A6,S100A3,S100A5,S100A2	S100A6	313	1
17_SCC152_H3K27ac_peak_50082_lociStitched	chr6	1024586	1064666	17	34	17346.6	3434.86	314	LOC285768		LOC285768	314	1
7_SCC152_H3K27ac_peak_20158_lociStitched	chr15	48237155	48256881	7	14	16293.7	2388.82	315			SLC24A5	315	1
4_SCC152_H3K27ac_peak_44310_lociStitched	chr3	194973289	194981209	4	8	17154.7	3274.92	316	C3orf21		C3orf21	316	1
