# Supplementary material for: p63 Directs Subtype-Specific Gene Expression in HPV+ Head and Neck Squamous Cell Carcinoma
Source: Front Oncol. 2022 May 31;12:879054. doi: 10.3389/fonc.2022.879054 (PMC9192977; doi:10.3389/fonc.2022.879054)
Supplement: Supplementary file 5 [file Table_4.xlsx]

## Sheet: SCC104 shp63 combined DEGs
	log2FC sh1	log2FC sh2	log2FC shAve
RPL3L	-2.04846	-7.36872	-4.70859
TREM2	-2.07079	-7.32537	-4.69808
GJB6	-1.75715	-7.49312	-4.62513
KRT75	-2.14071	-7.10735	-4.62403
TNNT2	-1.99464	-7.24912	-4.62188
IGFBP2	-1.87396	-7.06287	-4.46842
WTAPP1	-1.45923	-7.29505	-4.37714
MMP1	-1.55742	-6.94435	-4.25089
GJB2	-1.2796	-7.12505	-4.20232
ENDOU	-1.98648	-6.30594	-4.14621
FST	-1.39999	-5.98623	-3.69311
NFASC	-1.58842	-5.76585	-3.67714
CA12	-2.40208	-4.92887	-3.66548
CDHR1	-1.88747	-5.32141	-3.60444
SLC10A6	-1.41154	-5.70183	-3.55668
LGALS9C	-1.63194	-5.1597	-3.39582
MMP3	-1.57288	-5.21655	-3.39471
LINC00163	-2.58795	-4.05641	-3.32218
MMP10	-1.04427	-5.57586	-3.31006
IGFL1	-2.66109	-3.76508	-3.21309
FEZ1	-2.18575	-4.20397	-3.19486
NGFR	-1.2886	-5.02986	-3.15923
EDN2	-1.76764	-4.51706	-3.14235
GYLTL1B	-1.62278	-4.44889	-3.03583
GDPD2	-1.49423	-4.56893	-3.03158
APLN	-1.81791	-4.23229	-3.0251
USH1G	-1.45606	-4.54543	-3.00074
NSG1	-1.48741	-4.45597	-2.97169
TSPAN7	-1.45686	-4.34307	-2.89996
EBF3	-0.882177	-4.80679	-2.84448
HAS3	-1.49441	-4.13403	-2.81422
MCOLN2	-1.13417	-4.48967	-2.81192
NKD2	-1.90875	-3.55452	-2.73163
CASP14	-1.61764	-3.84478	-2.73121
MFNG	-1.19735	-4.21726	-2.7073
BDKRB2	-1.38816	-3.9508	-2.66948
GPR144	-1.61113	-3.68904	-2.65008
IL1B	-0.971913	-4.32095	-2.64643
GALNT9	-1.18663	-4.06399	-2.62531
CCND2	-0.722031	-4.4783	-2.60017
CXCL11	-0.894449	-4.19635	-2.5454
LRRC14B	-1.32281	-3.67149	-2.49715
GNB1L	-1.49721	-3.49547	-2.49634
HS3ST1	-1.28312	-3.6984	-2.49076
KRT13	-0.773999	-4.12511	-2.44956
CNTN1	-0.833176	-4.03134	-2.43226
ENTPD8	-1.6441	-3.2126	-2.42835
SDK2	-2.17141	-2.66408	-2.41774
RAB38	-0.96232	-3.83392	-2.39812
NIPAL4	-1.42618	-3.35506	-2.39062
FOLR3	-1.10994	-3.62977	-2.36985
MMP13	-0.472624	-4.23115	-2.35189
MIR30A	-1.25582	-3.44679	-2.35131
SH3PXD2A	-1.25904	-3.43558	-2.34731
PGAM2	-2.157	-2.52629	-2.34165
SCD	-0.674837	-3.87737	-2.2761
AQP3	-1.28266	-3.26491	-2.27378
SPRY4	-2.58142	-1.93819	-2.2598
PTHLH	-0.407534	-4.10915	-2.25834
SCN4B	-1.02636	-3.47823	-2.25229
S100A9	-0.437458	-3.98976	-2.21361
EDN1	-1.03929	-3.36045	-2.19987
SSTR5	-2.03962	-2.30326	-2.17144
SLC4A11	-0.829954	-3.47849	-2.15422
SOCS1	-1.5331	-2.75072	-2.14191
PCSK9	-0.993455	-3.26801	-2.13073
WNT4	-1.56016	-2.6853	-2.12273
AKR1C2	-1.15703	-3.08214	-2.11958
DUSP7	-0.842715	-3.37672	-2.10972
DLL1	-1.38954	-2.78779	-2.08866
QPRT	-1.52482	-2.62393	-2.07437
TNFRSF25	-1.18845	-2.93755	-2.063
CALML3	-1.60843	-2.50252	-2.05548
CYP4F11	-0.954075	-3.15478	-2.05443
FOSB	-0.802575	-3.30519	-2.05388
BCAM	-1.53739	-2.56375	-2.05057
IL17RE	-2.20933	-1.88452	-2.04693
ASB2	-1.71717	-2.34939	-2.03328
SLC13A3	-1.64815	-2.4148	-2.03148
TGM1	-0.929404	-3.10481	-2.01711
CYP26B1	-1.22782	-2.72575	-1.97679
GPR68	-1.5702	-2.37656	-1.97338
NDRG1	-1.032	-2.88115	-1.95657
NLRP3	-0.82172	-3.0831	-1.95241
PTP4A3	-1.15141	-2.74813	-1.94977
HOXD11	-1.38454	-2.4956	-1.94007
PADI3	-1.23666	-2.61068	-1.92367
GPX2	-0.900606	-2.94474	-1.92267
ESPN	-1.46909	-2.36724	-1.91816
BDKRB1	-0.796834	-3.01908	-1.90796
RHBDL1	-1.41549	-2.39517	-1.90533
MIR612	-1.59233	-2.21155	-1.90194
HSPA6	-1.29686	-2.50129	-1.89908
BCL11B	-0.767073	-3.01215	-1.88961
CLCA2	-0.281275	-3.4979	-1.88959
THBD	-0.435225	-3.32377	-1.8795
PDPN	-0.718306	-2.99106	-1.85468
FXYD3	-0.762833	-2.94385	-1.85334
KLK9	-0.676708	-3.01409	-1.8454
SNCA	-1.03295	-2.65076	-1.84186
WDR66	-0.567089	-3.11175	-1.83942
PLEKHG5	-0.899147	-2.77594	-1.83755
RASGEF1A	-1.46482	-2.20902	-1.83692
PSAPL1	-0.874444	-2.77483	-1.82464
TP63	-0.708274	-2.93012	-1.8192
IFFO2	-0.860832	-2.77376	-1.8173
FADS3	-1.03426	-2.58658	-1.81042
AKR1B10	-1.00931	-2.60486	-1.80708
FAM182B	-0.891997	-2.70747	-1.79973
FAM182A	-0.872785	-2.72598	-1.79938
ECM1	-0.881377	-2.69279	-1.78708
KIF17	-1.47688	-2.09681	-1.78685
RHOB	-1.12062	-2.41578	-1.7682
TCEA3	-1.7494	-1.77508	-1.76224
FGFBP1	-0.387459	-3.13578	-1.76162
KLHL30	-1.27301	-2.24671	-1.75986
KRT31	-0.738037	-2.76513	-1.75158
AKR1C1	-1.13554	-2.35002	-1.74278
PLCH2	-0.750591	-2.73119	-1.74089
STARD5	-1.04846	-2.43224	-1.74035
WDR65	-0.591142	-2.86076	-1.72595
ZFYVE28	-1.68108	-1.76838	-1.72473
CSTA	-0.410376	-3.03906	-1.72472
PLTP	-1.11012	-2.33931	-1.72471
KRT14	-0.777235	-2.67041	-1.72382
APCDD1L	-0.425649	-3.01195	-1.7188
TNFSF10	-0.77429	-2.62395	-1.69912
EFNB1	-0.745337	-2.64697	-1.69615
SFN	-0.755821	-2.61726	-1.68654
GBP6	-0.536127	-2.81723	-1.67668
TENM2	-1.05234	-2.27768	-1.66501
CXCR7	-0.957772	-2.37058	-1.66418
LSP1	-1.03956	-2.27918	-1.65937
TRPM4	-1.00471	-2.27843	-1.64157
SLC35F3	-1.18605	-2.08336	-1.6347
VWA2	-0.751061	-2.51015	-1.6306
NUDT7	-1.6603	-1.60062	-1.63046
RAPGEF3	-1.38806	-1.87058	-1.62932
S100A2	-0.750459	-2.47985	-1.61515
KRT6A	-0.447525	-2.78027	-1.6139
IL6R	-0.876392	-2.34753	-1.61196
SLC1A4	-1.12847	-2.09544	-1.61196
OLFM1	-1.28549	-1.93646	-1.61098
CYP27B1	-1.02261	-2.19175	-1.60718
SAMD5	-0.536174	-2.6726	-1.60438
FAM83C	-1.0164	-2.19189	-1.60414
CCDC3	-0.483843	-2.72332	-1.60358
TNC	-1.13642	-2.03401	-1.58521
COL7A1	-1.45557	-1.70395	-1.57976
KREMEN2	-1.14032	-2.01664	-1.57848
FGFR3	-0.940401	-2.21179	-1.5761
LDHD	-1.1567	-1.99498	-1.57584
ZNF219	-0.951545	-2.19213	-1.57184
PTGS1	-1.10763	-2.0182	-1.56292
SORL1	-1.09494	-2.0175	-1.55622
LFNG	-1.17454	-1.93574	-1.55514
KREMEN1	-0.733959	-2.37129	-1.55263
KRT42P	-0.95892	-2.12448	-1.5417
TLL2	-1.33531	-1.72233	-1.52882
TP53AIP1	-1.28769	-1.7584	-1.52305
RASSF10	-0.700146	-2.34525	-1.5227
C14orf132	-1.4401	-1.60042	-1.52026
ALDH3A1	-0.876452	-2.1486	-1.51253
MYC	-0.87293	-2.14359	-1.50826
VIPR1	-0.80382	-2.21063	-1.50722
MAPK15	-1.52412	-1.48408	-1.5041
FLRT3	-0.841891	-2.16382	-1.50285
AKR1C3	-1.07519	-1.92212	-1.49866
PCBP3	-1.45083	-1.53852	-1.49467
IFITM1	-0.674497	-2.29319	-1.48385
FAM25A	-1.02009	-1.94206	-1.48108
ALDH4A1	-0.993914	-1.96661	-1.48026
ADAM8	-0.945124	-2.00272	-1.47392
TMPRSS4	-0.363437	-2.57208	-1.46776
TMEM229B	-1.49496	-1.43853	-1.46675
ADAMTSL4	-0.74667	-2.17598	-1.46133
SLC22A23	-1.21828	-1.6889	-1.45359
RNF152	-0.716807	-2.17571	-1.44626
DFNA5	-0.309485	-2.56941	-1.43945
CYP2S1	-1.03505	-1.84264	-1.43884
PPP4R4	-0.520294	-2.35526	-1.43777
CMTM3	-1.49802	-1.37065	-1.43433
RIN1	-0.801319	-2.0625	-1.43191
GAA	-1.23611	-1.60982	-1.42296
GALNT18	-0.654919	-2.18987	-1.4224
CCBL1	-1.31125	-1.53325	-1.42225
WNT3A	-1.0492	-1.78837	-1.41879
TNS4	-0.514082	-2.31274	-1.41341
CYP1A1	-0.813583	-1.99364	-1.40361
CYB5R1	-0.546961	-2.25539	-1.40118
TNS1	-1.224	-1.57816	-1.40108
ADRB2	-0.452076	-2.34502	-1.39855
TGFA	-0.297246	-2.48907	-1.39316
DUOX2	-0.922019	-1.84279	-1.3824
POU2F2	-1.36579	-1.3951	-1.38045
HAP1	-0.690196	-2.06956	-1.37988
PKP1	-0.611065	-2.13868	-1.37487
CLDN1	-0.20135	-2.54049	-1.37092
ARVCF	-1.66269	-1.07547	-1.36908
CERS4	-1.17484	-1.56181	-1.36833
MARS2	-0.633946	-2.09484	-1.36439
ZNF485	-0.924405	-1.79827	-1.36134
CROCC	-1.30855	-1.41132	-1.35993
LOC541473	-0.853039	-1.86322	-1.35813
EGLN3	-1.06735	-1.62455	-1.34595
UPB1	-1.10242	-1.58907	-1.34574
ZDHHC11	-0.902988	-1.78744	-1.34521
SYT12	-1.18959	-1.49226	-1.34092
DUSP2	-0.957416	-1.71402	-1.33572
ABCG1	-0.465197	-2.19761	-1.3314
SLCO4A1	-1.02627	-1.62912	-1.3277
SLC20A2	-0.397884	-2.25551	-1.3267
ADAMTS15	-1.35014	-1.30155	-1.32585
CRELD1	-1.12955	-1.5197	-1.32463
LINC00273	-1.64055	-0.988588	-1.31457
EPPK1	-1.10931	-1.51709	-1.3132
PPP2R2C	-0.660663	-1.95819	-1.30943
S100A14	-0.466753	-2.14789	-1.30732
WNT7A	-0.535895	-2.07517	-1.30553
PALM2	-0.705169	-1.88448	-1.29482
LRRC8B	-0.682014	-1.90183	-1.29192
CAMK2A	-1.11325	-1.45337	-1.28331
SLC7A8	-1.18434	-1.37257	-1.27845
ARHGAP25	-1.16447	-1.38696	-1.27571
NOXO1	-1.38346	-1.16361	-1.27353
ST6GALNAC2	-0.308425	-2.23781	-1.27312
ABLIM1	-0.514797	-2.02078	-1.26779
TACSTD2	-0.571021	-1.96202	-1.26652
ARL4D	-0.529218	-1.985	-1.25711
IL1RAP	-0.230503	-2.2783	-1.2544
DUSP9	-0.524689	-1.98237	-1.25353
JUN	-0.675582	-1.82541	-1.25049
GGT1	-0.7617	-1.73431	-1.248
MAOA	-0.336478	-2.15472	-1.2456
KRT16	-0.755796	-1.73333	-1.24456
BCO2	-0.552271	-1.91577	-1.23402
NUAK2	-0.484207	-1.98155	-1.23288
SREBF2	-0.774345	-1.6892	-1.23177
TNFRSF21	-0.891245	-1.5563	-1.22377
ARMC5	-0.609146	-1.83312	-1.22113
SOX15	-0.730725	-1.70523	-1.21798
ALDH6A1	-0.804766	-1.62102	-1.21289
AHDC1	-1.17198	-1.25312	-1.21255
SH3BP1	-1.14628	-1.27528	-1.21078
GJB3	-0.61659	-1.80133	-1.20896
LOC100129046	-1.22767	-1.18836	-1.20802
DNAH1	-0.921633	-1.4896	-1.20562
ASS1	-0.601651	-1.80011	-1.20088
LHX6	-0.731212	-1.6619	-1.19655
LDLR	-0.620839	-1.76809	-1.19446
RASA3	-0.936554	-1.45151	-1.19403
DOK7	-0.62805	-1.75512	-1.19158
FAT2	-0.860936	-1.52114	-1.19104
CLMN	-0.645791	-1.73064	-1.18821
ATP2C2	-0.627278	-1.74769	-1.18748
ALDH2	-1.14887	-1.22192	-1.1854
SLC2A9	-0.597669	-1.76733	-1.1825
PPIF	-0.682091	-1.67942	-1.18076
GPR75	-1.04625	-1.31015	-1.1782
SLC9A3	-1.03939	-1.31635	-1.17787
FJX1	-0.725934	-1.62945	-1.17769
JPH2	-0.759945	-1.58664	-1.17329
CTU1	-1.06466	-1.28184	-1.17325
PROSER2	-0.709137	-1.63377	-1.17146
COL18A1	-1.7022	-0.639747	-1.17097
PLEKHG4B	-0.587447	-1.74863	-1.16804
KRT5	-0.660547	-1.67549	-1.16802
CYGB	-0.903575	-1.42745	-1.16551
CLEC2B	-0.313164	-2.00768	-1.16042
LTBP4	-1.25221	-1.06438	-1.1583
SQLE	-0.701743	-1.61421	-1.15797
FAM213A	-0.441197	-1.86683	-1.15401
KRT17	-0.399556	-1.90312	-1.15134
LINC00319	-1.05677	-1.24437	-1.15057
CARD10	-0.735764	-1.56246	-1.14911
SRPX	-0.506527	-1.78466	-1.14559
TUSC1	-0.608887	-1.67783	-1.14336
CORO2A	-0.72842	-1.55356	-1.14099
TRAPPC6A	-0.95782	-1.31997	-1.13889
MICAL2	-0.410623	-1.86552	-1.13807
CLU	-0.664288	-1.60823	-1.13626
KLF13	-0.677728	-1.59309	-1.13541
PROSAPIP1	-0.932756	-1.33784	-1.1353
RGS12	-0.855624	-1.41039	-1.13301
TPPP	-0.705393	-1.55633	-1.13086
THBS2	-0.872515	-1.38248	-1.1275
FAT1	-0.595618	-1.6591	-1.12736
COL17A1	-0.707024	-1.53736	-1.12219
DAB2IP	-0.639463	-1.59878	-1.11912
SIPA1L3	-0.825566	-1.39975	-1.11266
MDFI	-0.542556	-1.67782	-1.11019
GPR155	-0.701068	-1.51207	-1.10657
NAV1	-0.501652	-1.71142	-1.10653
DKK3	-0.929962	-1.27513	-1.10255
SLC9A3R1	-0.55457	-1.64968	-1.10212
CADM4	-0.715278	-1.48101	-1.09814
CELSR1	-0.822145	-1.3659	-1.09402
PTAFR	-0.471802	-1.7132	-1.0925
HSD17B8	-0.523588	-1.65881	-1.0912
PROCR	-0.421861	-1.75191	-1.08689
MAT2A	-0.479493	-1.6792	-1.07935
SHC1	-0.557707	-1.60093	-1.07932
XG	-0.97063	-1.18262	-1.07662
DHCR7	-0.817853	-1.33105	-1.07445
BICD2	-0.777148	-1.37066	-1.0739
RAPGEFL1	-0.546678	-1.60022	-1.07345
TACC2	-0.81577	-1.32889	-1.07233
HPS6	-0.745553	-1.39868	-1.07212
IGSF3	-0.882563	-1.2607	-1.07163
TRPV1	-0.995766	-1.14069	-1.06823
HR	-0.750844	-1.3832	-1.06702
KLF7	-0.502283	-1.63128	-1.06678
RASD1	-0.763333	-1.36858	-1.06596
TRIM7	-0.68945	-1.44174	-1.06559
DLK2	-0.890815	-1.23728	-1.06405
TRIM29	-0.461789	-1.66009	-1.06094
PFKFB4	-0.797334	-1.31883	-1.05808
ENDOV	-0.833886	-1.28075	-1.05732
MON1A	-0.954816	-1.15966	-1.05724
PUS1	-0.572319	-1.54077	-1.05655
LENG9	-0.803924	-1.29991	-1.05192
TMEM63B	-0.728987	-1.37456	-1.05177
KIAA1644	-0.660901	-1.44096	-1.05093
SEMA3F	-0.597481	-1.50086	-1.04917
SLC5A10	-0.729908	-1.36552	-1.04771
PHLDA2	-0.55922	-1.53465	-1.04694
FABP5	-0.285274	-1.80592	-1.0456
KCNK6	-0.676335	-1.4102	-1.04327
UCKL1-AS1	-1.02519	-1.05825	-1.04172
LRRC8A	-0.663813	-1.41893	-1.04137
PLD2	-0.720627	-1.36183	-1.04123
PRKX	-0.720351	-1.36103	-1.04069
PDE2A	-0.868631	-1.21209	-1.04036
LPAR3	-0.694312	-1.38627	-1.04029
ABCA2	-1.19141	-0.88373	-1.03757
SLC6A15	-0.358982	-1.71164	-1.03531
JUND	-0.493093	-1.57724	-1.03517
MOB3A	-0.986182	-1.08354	-1.03486
CD9	-0.445864	-1.62319	-1.03452
PARD6G	-0.597807	-1.47118	-1.03449
PORCN	-0.434682	-1.63378	-1.03423
SLC47A2	-0.729514	-1.33817	-1.03384
TSPAN9	-0.91174	-1.15517	-1.03346
TINCR	-0.820818	-1.24161	-1.03121
BCAR3	-0.389863	-1.66526	-1.02756
ZIC5	-0.510009	-1.54477	-1.02739
AHRR	-0.695935	-1.34274	-1.01934
SIK1	-0.502634	-1.53509	-1.01886
FAM83G	-0.775907	-1.25121	-1.01356
TRAPPC12	-0.623836	-1.40321	-1.01352
MANF	-0.641135	-1.38545	-1.01329
ALDOC	-0.802288	-1.22187	-1.01208
PYCARD	-1.00795	-1.00584	-1.0069
C1R	-0.660821	-1.35265	-1.00673
MMRN2	-0.592022	-1.41607	-1.00405
OAF	-0.554963	-1.45103	-1.00299
GPC1	-0.765218	-1.23674	-1.00098
ETS2	-0.174828	-1.82472	-0.999776
SESN3	-0.665868	-1.33103	-0.998449
NAPRT1	-0.751037	-1.24559	-0.998314
EDARADD	-0.88044	-1.11477	-0.997603
PLEKHH1	-0.655095	-1.33851	-0.996801
FUT4	-0.452157	-1.53944	-0.995797
KLHL21	-0.680635	-1.30779	-0.994211
ABTB1	-0.686257	-1.30008	-0.993169
LAMB3	-0.493412	-1.4929	-0.993157
HTRA3	-0.681543	-1.30451	-0.993025
SECTM1	-0.686254	-1.29825	-0.992255
STARD4	-0.385221	-1.59252	-0.988869
TMEM140	-0.674675	-1.30295	-0.988815
DCAKD	-0.749039	-1.22513	-0.987087
C20orf194	-0.846846	-1.12596	-0.986403
SMO	-1.17571	-0.797033	-0.98637
SELO	-0.981228	-0.969982	-0.975605
ZHX2	-1.07157	-0.876894	-0.97423
PRNP	-0.222267	-1.72512	-0.973691
EHD1	-0.827934	-1.11771	-0.972824
LAMC3	-0.883124	-1.06004	-0.97158
LOC728431	-0.780468	-1.1521	-0.966282
BCAT2	-0.697761	-1.23372	-0.965739
SIAH2	-0.449028	-1.47939	-0.96421
EHD3	-0.434006	-1.49043	-0.962217
KLK8	-0.430069	-1.48714	-0.958605
POLR1C	-0.411201	-1.50015	-0.955676
COL8A2	-0.757497	-1.15016	-0.953827
ARMC7	-0.711332	-1.1961	-0.953718
GNA15	-0.54361	-1.36121	-0.952409
NLRP1	-0.585777	-1.31626	-0.951019
RHOBTB2	-1.15642	-0.743756	-0.950087
PC	-1.14623	-0.749869	-0.94805
BTN3A1	-0.967188	-0.927882	-0.947535
NOP16	-0.498753	-1.39479	-0.946773
ENTPD7	-0.341926	-1.55109	-0.94651
BCL7A	-0.558625	-1.33285	-0.94574
CLN8	-0.665316	-1.22599	-0.945655
GPRC5C	-0.887344	-0.998421	-0.942882
FRMD4A	-0.863529	-1.01815	-0.940839
RAB26	-0.812384	-1.06431	-0.938348
KRT15	-0.307604	-1.56707	-0.937338
C1S	-0.545242	-1.32872	-0.936979
TPPP3	-0.35645	-1.5161	-0.936277
LRP8	-0.552367	-1.31015	-0.931259
FBXL18	-0.72704	-1.13307	-0.930057
GANC	-0.590607	-1.26765	-0.929129
SEMA3B	-0.889549	-0.967675	-0.928612
COL9A2	-0.797824	-1.05915	-0.928486
SPRED2	-0.531926	-1.32197	-0.926946
MSMO1	-0.417144	-1.43026	-0.923704
IRF6	-0.163918	-1.68079	-0.922356
KLHL36	-0.998962	-0.843535	-0.921248
AGPAT2	-0.621814	-1.2173	-0.919559
EML2	-0.830412	-1.00821	-0.919312
CKB	-0.661139	-1.17338	-0.917259
TNFAIP1	-0.316075	-1.51823	-0.917155
TNNT1	-0.690648	-1.14098	-0.915814
MFSD3	-0.831353	-0.99991	-0.915632
ALKBH2	-0.521572	-1.30779	-0.914683
FDXR	-0.787484	-1.04051	-0.913995
FBRSL1	-0.998548	-0.829284	-0.913916
COL27A1	-0.793853	-1.03227	-0.913061
RABGGTA	-0.454592	-1.36963	-0.91211
LTB4R	-0.907143	-0.913528	-0.910335
SREBF1	-0.292412	-1.52627	-0.909339
TNK1	-0.602389	-1.21509	-0.908741
SSH1	-0.459786	-1.34696	-0.903374
GRAMD2	-0.870497	-0.927625	-0.899061
IRF2BPL	-0.612834	-1.17817	-0.895502
ACSS2	-0.740637	-1.05014	-0.895386
NR6A1	-0.766741	-1.02382	-0.895278
GRAMD4	-0.752174	-1.02246	-0.887319
WDR54	-0.606519	-1.16763	-0.887076
MAFK	-0.652188	-1.12178	-0.886983
SYNGR2	-0.671656	-1.1016	-0.886626
FRMD8	-0.687733	-1.08524	-0.886487
C16orf74	-0.535358	-1.23618	-0.88577
MAMDC4	-1.07349	-0.694575	-0.884033
POP1	-0.417237	-1.3475	-0.88237
TFCP2L1	-0.649501	-1.1143	-0.8819
DSC3	-0.199744	-1.56327	-0.881506
LRP1	-0.807711	-0.95107	-0.879391
URB2	-0.450429	-1.30792	-0.879173
IL4R	-0.345958	-1.41103	-0.878495
GATS	-0.653127	-1.10364	-0.878382
MAD1L1	-0.808603	-0.947818	-0.878211
ASB13	-0.453381	-1.29849	-0.875937
CHST15	-0.416148	-1.33402	-0.875083
IGSF8	-0.954287	-0.795096	-0.874692
GPR153	-0.759483	-0.984449	-0.871966
RRP7B	-0.937083	-0.805385	-0.871234
IPPK	-0.520521	-1.22006	-0.870288
NRG1	-0.589956	-1.14349	-0.866724
CCDC88C	-0.524041	-1.2061	-0.865071
RTKN	-0.587632	-1.13952	-0.863579
ING5	-0.62758	-1.09838	-0.86298
MFSD10	-0.632495	-1.09187	-0.862181
IGFBP6	-0.79728	-0.926283	-0.861782
MNT	-0.763347	-0.95793	-0.860639
ADAMTSL5	-0.758361	-0.961936	-0.860149
N4BP3	-0.976985	-0.738097	-0.857541
ALDH7A1	-0.5701	-1.14117	-0.855633
PITPNC1	-0.945589	-0.757699	-0.851644
TMEM44	-0.75861	-0.944118	-0.851364
DST	-0.368109	-1.32987	-0.848989
MACROD1	-0.620575	-1.07354	-0.847056
DTX2	-0.633157	-1.06081	-0.846985
ZC3H12A	-0.607026	-1.08617	-0.846598
ZSCAN22	-0.795295	-0.8919	-0.843597
PPP1R10	-0.538607	-1.14752	-0.843062
PRKCH	-0.491363	-1.18644	-0.838903
RHBDL2	-0.698559	-0.969448	-0.834004
ZNF668	-0.733631	-0.933252	-0.833441
HDAC5	-0.899638	-0.7671	-0.833369
WLS	-0.432994	-1.23299	-0.83299
FSCN1	-0.705702	-0.956391	-0.831046
GM2A	-0.624158	-1.03754	-0.83085
C10orf2	-0.464262	-1.1953	-0.829779
PPARD	-0.588762	-1.07072	-0.82974
MT2A	-0.587488	-1.07167	-0.829579
MFSD9	-0.687771	-0.970924	-0.829348
TMEM132A	-0.945409	-0.708269	-0.826839
SLC6A11	-0.724149	-0.929476	-0.826812
ZNF324	-0.774711	-0.876462	-0.825587
IRX4	-0.503343	-1.14782	-0.82558
TYMP	-0.654822	-0.993161	-0.823991
MROH6	-0.793615	-0.84678	-0.820197
TOP1MT	-0.686134	-0.94632	-0.816227
APP	-0.60812	-1.02429	-0.816204
PLAU	-0.316022	-1.31358	-0.814803
MPP3	-0.594117	-1.03403	-0.814074
MAPKBP1	-0.492217	-1.13566	-0.813939
TSTD1	-0.46325	-1.16174	-0.812497
KCNS3	-0.439504	-1.18337	-0.811438
ESRRA	-0.66566	-0.957153	-0.811407
WDR91	-0.533361	-1.08758	-0.810471
MIDN	-0.728962	-0.891966	-0.810464
GJB5	-0.386054	-1.2341	-0.810077
ZNF408	-0.658174	-0.959199	-0.808687
PDGFA	-0.626216	-0.988888	-0.807552
CCDC127	-0.560798	-1.04197	-0.801386
MEGF6	-1.14405	-0.457053	-0.80055
SPEG	-1.01963	-0.578252	-0.798939
DAPK3	-0.481094	-1.1149	-0.797995
ADM	-0.614113	-0.978578	-0.796345
SLC48A1	-0.749092	-0.841774	-0.795433
TKT	-0.564942	-1.0258	-0.795369
FMNL2	-0.311147	-1.27239	-0.79177
SNHG15	-0.467029	-1.11558	-0.791303
SELRC1	-0.41971	-1.1603	-0.790006
ZNF581	-0.853051	-0.7233	-0.788176
LOC100289019	-0.712661	-0.858651	-0.785656
POLR1B	-0.265011	-1.30358	-0.784294
GPSM1	-0.970754	-0.591501	-0.781127
RRS1	-0.448499	-1.11356	-0.781028
PLCD1	-0.914026	-0.644901	-0.779463
ZNF574	-0.669376	-0.885987	-0.777682
TMTC4	-0.618661	-0.932114	-0.775388
P2RY2	-0.572781	-0.975905	-0.774343
TNFRSF10A	-0.703181	-0.840223	-0.771702
PLEC	-0.803624	-0.73578	-0.769702
APOBEC3C	-0.622891	-0.91381	-0.76835
MESDC1	-0.498155	-1.03774	-0.767949
ZYX	-0.557125	-0.973776	-0.765451
SCRN2	-0.770484	-0.760378	-0.765431
SLC2A1	-0.753933	-0.776897	-0.765415
CAMKK1	-0.64389	-0.886564	-0.765227
SERTAD1	-0.555075	-0.970889	-0.762982
FDFT1	-0.525368	-0.997462	-0.761415
WDR37	-0.480049	-1.04091	-0.760478
TMEM184A	-0.730324	-0.785933	-0.758128
NFE2L1	-0.971239	-0.54312	-0.757179
ETV3	-0.824585	-0.689066	-0.756826
C8orf58	-0.654868	-0.858383	-0.756625
IGSF9	-0.571227	-0.940391	-0.755809
ZSCAN25	-0.569572	-0.937431	-0.753501
RNF126	-0.626805	-0.876956	-0.75188
B3GALT6	-0.424492	-1.07495	-0.749723
RPIA	-0.560667	-0.932536	-0.746602
NME3	-0.871353	-0.617995	-0.744674
ESF1	-0.36953	-1.119	-0.744265
PTPRE	-0.686665	-0.796735	-0.7417
PLEKHF1	-0.687182	-0.795157	-0.741169
MAP3K9	-0.718922	-0.761524	-0.740223
ITGB4	-0.50158	-0.977571	-0.739575
LMTK3	-0.774472	-0.70217	-0.738321
RAB11FIP3	-0.808089	-0.66733	-0.737709
MMAB	-0.603545	-0.870647	-0.737096
ZNF142	-0.595428	-0.877952	-0.73669
TRIM27	-0.426873	-1.04594	-0.736406
NDUFA1	-0.639654	-0.833104	-0.736379
PRDX5	-0.459025	-1.01352	-0.736273
PRICKLE3	-0.572041	-0.897111	-0.734576
PMM2	-0.244116	-1.22496	-0.734537
GPATCH3	-0.582436	-0.884276	-0.733356
ZDHHC9	-0.472097	-0.987285	-0.729691
LDB1	-0.74103	-0.71832	-0.729675
KIF16B	-0.632044	-0.827132	-0.729588
PVRL1	-0.315481	-1.1429	-0.729188
SCARB1	-0.424822	-1.03345	-0.729135
GPATCH4	-0.384601	-1.07318	-0.728892
ARAP1	-0.723434	-0.733263	-0.728349
CST3	-0.538653	-0.917312	-0.727983
GTPBP5	-0.672998	-0.775658	-0.724328
IMP3	-0.516333	-0.931344	-0.723838
CCDC88B	-0.755364	-0.691456	-0.72341
SH2D5	-0.628587	-0.81644	-0.722513
PLEKHO2	-0.621245	-0.82128	-0.721263
ACTG1	-0.322584	-1.11692	-0.71975
TGFB1	-0.906622	-0.531969	-0.719295
WDR3	-0.448035	-0.989926	-0.718981
SLC29A1	-0.397729	-1.03871	-0.718222
FUT1	-0.725303	-0.710612	-0.717957
RABAC1	-0.896344	-0.538086	-0.717215
RPS28	-0.608872	-0.824663	-0.716768
GRWD1	-0.512899	-0.92009	-0.716494
SMTN	-0.533002	-0.898304	-0.715653
PPRC1	-0.433909	-0.996616	-0.715262
BNC1	-0.185929	-1.24447	-0.715199
F2R	-0.461934	-0.967638	-0.714786
PLP2	-0.307151	-1.11591	-0.711528
SDC1	-0.508017	-0.914097	-0.711057
EPHA2	-0.550682	-0.870128	-0.710405
B4GALT5	-0.771245	-0.648602	-0.709924
MFAP2	-0.698292	-0.719756	-0.709024
ALDH1B1	-0.424797	-0.989076	-0.706936
KRTCAP3	-0.535544	-0.875315	-0.705429
ATG4B	-0.600212	-0.809236	-0.704724
ATP8B2	-0.697414	-0.710785	-0.704099
NCS1	-0.658054	-0.747454	-0.702754
NUDT1	-0.733141	-0.670052	-0.701596
LSS	-0.607366	-0.791908	-0.699637
RPL18A	-0.472515	-0.926743	-0.699629
QPCTL	-0.733584	-0.661681	-0.697633
PBXIP1	-0.717453	-0.677231	-0.697342
NCR3LG1	-0.6114	-0.782451	-0.696926
SLC7A1	-0.574963	-0.814631	-0.694797
SURF6	-0.593811	-0.795403	-0.694607
SDHA	-0.35719	-1.03116	-0.694174
FASN	-0.671055	-0.715358	-0.693207
SEL1L3	-0.573348	-0.810958	-0.692153
CD68	-0.723192	-0.658701	-0.690947
SHANK3	-0.684903	-0.693698	-0.6893
BLVRB	-0.727191	-0.648886	-0.688038
ZBTB9	-0.467879	-0.907346	-0.687613
KIAA1161	-0.67241	-0.702789	-0.687599
RRP1	-0.630284	-0.744219	-0.687251
TRIM21	-0.550301	-0.822898	-0.686599
ETFB	-0.504006	-0.868525	-0.686266
PDCD11	-0.466679	-0.905581	-0.68613
SLC6A6	-0.606701	-0.764116	-0.685408
TSHZ3	-0.675811	-0.688891	-0.682351
NOP2	-0.298546	-1.06587	-0.682207
NUDT8	-0.636331	-0.726482	-0.681407
MYBBP1A	-0.586758	-0.772898	-0.679828
MOCS3	-0.406156	-0.953216	-0.679686
CSNK1E	-0.413792	-0.942819	-0.678306
SBNO2	-0.622222	-0.733913	-0.678068
ZFYVE21	-0.409361	-0.945452	-0.677406
JHDM1D	-0.527187	-0.827389	-0.677288
BCAR1	-0.538175	-0.813888	-0.676032
SIDT2	-0.667741	-0.683349	-0.675545
DDX28	-0.447394	-0.899152	-0.673273
TAF5L	-0.27563	-1.06812	-0.671873
TIGD5	-0.616319	-0.727098	-0.671709
PLA2R1	-0.404162	-0.938349	-0.671255
ARSI	-0.370949	-0.969056	-0.670003
ABCB6	-0.559358	-0.780029	-0.669694
MSRB1	-0.775229	-0.561321	-0.668275
SNCG	-0.424883	-0.911489	-0.668186
KIRREL	-0.646718	-0.686521	-0.66662
ADAM22	-0.719077	-0.608718	-0.663898
C11orf24	-0.355506	-0.971885	-0.663696
HIST1H4L	-0.30979	-1.01431	-0.662048
PARS2	-0.487487	-0.836336	-0.661911
MRPS2	-0.499184	-0.821975	-0.660579
ZNF696	-0.572464	-0.746964	-0.659714
C1RL	-0.460112	-0.859133	-0.659623
TMSB10	-0.222205	-1.09656	-0.659384
FEM1A	-0.494611	-0.823899	-0.659255
HSPB1	-0.492679	-0.825491	-0.659085
RASIP1	-0.667422	-0.650134	-0.658778
SLC25A23	-0.752862	-0.563638	-0.65825
INPPL1	-0.517817	-0.797706	-0.657761
UCK2	-0.366998	-0.944483	-0.655741
ATP2B4	-0.502564	-0.808154	-0.655359
TMEM120B	-0.543263	-0.766507	-0.654885
EXOSC4	-0.612585	-0.695355	-0.65397
JMJD4	-0.662458	-0.644184	-0.653321
CLSTN1	-0.719191	-0.58694	-0.653066
ZNF692	-0.802084	-0.503157	-0.65262
SLC1A5	-0.36749	-0.935577	-0.651534
PHLDA3	-0.595683	-0.703255	-0.649469
NCOA5	-0.352673	-0.945695	-0.649184
TRIM47	-0.624183	-0.674024	-0.649104
PDCD4	-0.41603	-0.877857	-0.646943
ANKH	-0.475901	-0.817703	-0.646802
KCTD15	-0.828875	-0.460931	-0.644903
DLGAP4	-0.51616	-0.770221	-0.64319
CLP1	-0.433007	-0.852561	-0.642784
ZNF551	-0.349905	-0.934697	-0.642301
LAD1	-0.575234	-0.708043	-0.641638
PDLIM4	-0.636929	-0.646119	-0.641524
USP31	-0.244263	-1.03753	-0.640897
IMPA2	-0.378803	-0.902286	-0.640544
MRPL16	-0.737826	-0.542387	-0.640106
AGRN	-0.72288	-0.556471	-0.639675
FBLIM1	-0.250008	-1.0262	-0.638106
DDR1	-0.438674	-0.833921	-0.636297
NISCH	-0.501969	-0.765073	-0.633521
AGTRAP	-0.527047	-0.739445	-0.633246
RMRP	-0.592124	-0.672972	-0.632548
KIAA0930	-0.602718	-0.661876	-0.632297
GALNT11	-0.445633	-0.815516	-0.630575
PFKFB3	-0.544963	-0.715052	-0.630007
ZNF584	-0.564868	-0.694989	-0.629929
ZNHIT2	-0.721974	-0.537486	-0.62973
YWHAG	-0.23288	-1.02654	-0.629708
LSM7	-0.465602	-0.79353	-0.629566
FAM89A	-0.618986	-0.639616	-0.629301
RBM12	-0.215186	-1.04278	-0.628982
FOSL1	-0.512017	-0.745564	-0.628791
FARS2	-0.586806	-0.669566	-0.628186
ASB6	-0.63319	-0.621222	-0.627206
GRN	-0.800354	-0.453897	-0.627125
SMCR7L	-0.445818	-0.8083	-0.627059
PLD3	-0.650919	-0.602992	-0.626955
TGFBRAP1	-0.626694	-0.624718	-0.625706
NIPSNAP1	-0.54792	-0.701182	-0.624551
TRIM41	-0.638687	-0.607835	-0.623261
PPP1R12B	-0.369506	-0.876527	-0.623016
CRIP2	-0.631905	-0.6136	-0.622752
NSMCE1	-0.390535	-0.852388	-0.621461
LAMC2	-0.260057	-0.982108	-0.621083
PODXL2	-0.478639	-0.763312	-0.620975
ACLY	-0.24561	-0.995553	-0.620581
RBMXL1	-0.293374	-0.944171	-0.618773
TSR1	-0.470267	-0.76585	-0.618059
CBX2	-0.563606	-0.671619	-0.617612
CDH13	-0.392517	-0.840126	-0.616321
TYSND1	-0.48949	-0.737719	-0.613604
IFITM3	-0.411502	-0.812412	-0.611957
HELZ2	-0.831738	-0.391117	-0.611427
DCAF4	-0.490155	-0.732361	-0.611258
SLC38A5	-0.292514	-0.928376	-0.610445
CHID1	-0.739554	-0.480469	-0.610011
C12orf44	-0.57608	-0.63994	-0.60801
PLCB3	-0.454634	-0.758339	-0.606487
SRXN1	-0.185918	-1.02555	-0.605736
TSPO	-0.529749	-0.679345	-0.604547
TBC1D4	-0.716471	-0.491863	-0.604167
OLFML2A	-0.620913	-0.587196	-0.604055
PDGFB	-0.468884	-0.737736	-0.60331
TMBIM1	-0.356537	-0.84909	-0.602813
NUDT19	-0.344587	-0.86006	-0.602323
EVPL	-0.649934	-0.554517	-0.602225
SLC12A7	-0.764516	-0.438978	-0.601747
KIAA1609	-0.381098	-0.821331	-0.601214
ALAS1	-0.325641	-0.876174	-0.600908
BCR	-0.55194	-0.643729	-0.597834
PAN2	-0.591405	-0.603806	-0.597605
RELT	-0.358959	-0.835563	-0.597261
RREB1	-0.562072	-0.632295	-0.597183
SH3TC1	-0.657458	-0.535099	-0.596278
DIDO1	-0.413692	-0.777692	-0.595692
MVD	-0.58233	-0.60746	-0.594895
SNORA57	-0.623827	-0.561326	-0.592577
RRP12	-0.401331	-0.782935	-0.592133
CELSR3	-0.723525	-0.457803	-0.590664
SLC3A2	-0.439933	-0.739428	-0.589681
HMGCR	-0.280856	-0.897831	-0.589344
ST14	-0.543289	-0.633963	-0.588626
TM9SF4	-0.496863	-0.67837	-0.587616
LOC284454	-0.518668	-0.65553	-0.587099
CES2	-0.597834	-0.570904	-0.584369
LY6E	-0.380096	-0.787144	-0.58362
PTGFRN	-0.496519	-0.670226	-0.583373
RALGDS	-0.380921	-0.785603	-0.583262
HMG20B	-0.308218	-0.854782	-0.5815
CD81	-0.653741	-0.508626	-0.581183
ULK3	-0.609652	-0.55225	-0.580951
ADIPOR2	-0.248129	-0.913306	-0.580718
PPP1R13L	-0.567067	-0.593556	-0.580312
BAIAP2	-0.496224	-0.663252	-0.579738
PMPCA	-0.330885	-0.825069	-0.577977
POLG	-0.484139	-0.670574	-0.577356
WDR82	-0.294138	-0.858547	-0.576343
AXIN1	-0.61518	-0.537157	-0.576168
TOLLIP	-0.637482	-0.508453	-0.572967
AHNAK2	-0.56204	-0.583478	-0.572759
BRMS1	-0.413831	-0.726954	-0.570393
JUP	-0.445631	-0.694045	-0.569838
KCNAB2	-0.72789	-0.409829	-0.56886
KCTD10	-0.443519	-0.692077	-0.567798
ZNF746	-0.54829	-0.586775	-0.567532
GSTP1	-0.218674	-0.913319	-0.565996
BRD9	-0.338913	-0.792934	-0.565924
GPR56	-0.656871	-0.472312	-0.564591
TUBB4B	-0.452959	-0.675595	-0.564277
RRAD	-0.334533	-0.793307	-0.56392
IL20RB	-0.184311	-0.942815	-0.563563
F11R	-0.365668	-0.761438	-0.563553
C1orf172	-0.466201	-0.660145	-0.563173
CSTB	-0.411682	-0.711288	-0.561485
POLR1E	-0.29865	-0.823193	-0.560922
CDC42SE1	-0.213437	-0.908324	-0.560881
MTSS1L	-0.721412	-0.39955	-0.560481
SOCS3	-0.357583	-0.76331	-0.560447
PWP2	-0.334618	-0.786141	-0.560379
HSP90B1	-0.255041	-0.865555	-0.560298
HLA-F	-0.608	-0.511227	-0.559613
SZT2	-0.488751	-0.628857	-0.558804
HSPA2	-0.367624	-0.747936	-0.55778
FAM69A	-0.407219	-0.707213	-0.557216
TAGLN	-0.384618	-0.72917	-0.556894
EPAS1	-0.444368	-0.667196	-0.555782
RCE1	-0.54876	-0.562772	-0.555766
SDE2	-0.258605	-0.852408	-0.555506
SPRYD3	-0.409376	-0.701259	-0.555317
GPN2	-0.368775	-0.737732	-0.553253
PTK6	-0.353278	-0.750876	-0.552077
GPATCH2L	-0.439928	-0.663692	-0.55181
SERINC2	-0.483034	-0.619337	-0.551186
ECE2	-0.43417	-0.664205	-0.549187
ZNF622	-0.380481	-0.717112	-0.548797
AAR2	-0.298066	-0.796749	-0.547407
FAM83H	-0.411605	-0.679914	-0.545759
IFI27L2	-0.479991	-0.611468	-0.54573
FBXO31	-0.468782	-0.622579	-0.54568
NCBP2	-0.285368	-0.803468	-0.544418
SNAPC4	-0.494441	-0.587187	-0.540814
TAF1C	-0.518055	-0.563083	-0.540569
TNRC18	-0.709434	-0.363745	-0.53659
WDR6	-0.603671	-0.467478	-0.535574
HIP1R	-0.631418	-0.438995	-0.535207
THEM6	-0.450295	-0.619258	-0.534777
C16orf72	-0.509953	-0.557241	-0.533597
CCS	-0.450111	-0.615608	-0.532859
C2CD2	-0.378034	-0.687667	-0.532851
POLR3H	-0.462757	-0.600626	-0.531692
ADORA2B	-0.243425	-0.817146	-0.530285
HLA-E	-0.384457	-0.674416	-0.529436
NOP56	-0.197384	-0.857271	-0.527328
LRP5	-0.701714	-0.352792	-0.527253
JAG2	-0.628534	-0.424685	-0.52661
ZNF304	-0.43039	-0.621182	-0.525786
HMOX2	-0.278137	-0.773026	-0.525581
ZNF496	-0.562166	-0.487367	-0.524766
FLYWCH1	-0.633137	-0.413136	-0.523137
SH2B1	-0.620918	-0.425248	-0.523083
PHRF1	-0.516834	-0.527037	-0.521936
CBR1	-0.454958	-0.588387	-0.521672
INTS5	-0.346225	-0.697043	-0.521634
ZNF526	-0.586368	-0.455415	-0.520891
JUNB	-0.600002	-0.43805	-0.519026
TMEM115	-0.607274	-0.430476	-0.518875
CRK	-0.27079	-0.766749	-0.518769
DSG3	-0.262202	-0.775061	-0.518631
RHOT2	-0.585422	-0.451816	-0.518619
ARL4C	-0.225704	-0.810707	-0.518205
RPL37A	-0.209888	-0.826189	-0.518039
DHX34	-0.483694	-0.549588	-0.516641
AKR1A1	-0.298528	-0.733864	-0.516196
RCN3	-0.623135	-0.406438	-0.514786
STRADA	-0.484803	-0.543203	-0.514003
MYO9A	-0.27035	-0.755855	-0.513102
SGSM3	-0.456426	-0.567331	-0.511878
ATAD3B	-0.557149	-0.465623	-0.511386
ALS2CL	-0.283283	-0.737896	-0.510589
PFKM	-0.381026	-0.639863	-0.510444
NOTCH1	-0.624338	-0.395058	-0.509698
RPL37	-0.309476	-0.707997	-0.508736
CXXC1	-0.468642	-0.548013	-0.508328
GPX1	-0.404985	-0.610788	-0.507887
USP36	-0.490762	-0.524736	-0.507749
HIP1	-0.336305	-0.677727	-0.507016
PDIA6	-0.429427	-0.584182	-0.506805
PPARA	-0.53066	-0.480396	-0.505528
PIP4K2B	-0.652363	-0.35798	-0.505172
HK2	-0.288885	-0.717384	-0.503134
ZNF398	-0.359065	-0.646318	-0.502692
BCKDHA	-0.648723	-0.355873	-0.502298
TRAP1	-0.347966	-0.656366	-0.502166
RPL13	-0.422515	-0.581012	-0.501763
CACTIN	-0.556285	-0.446342	-0.501313
ITGA3	-0.418259	-0.584281	-0.50127
TARBP2	-0.55142	-0.450915	-0.501167
EEF1A1	-0.303027	-0.697641	-0.500334
TAOK2	-0.445528	-0.554196	-0.499862
FADD	-0.389166	-0.609945	-0.499555
AAAS	-0.370725	-0.623274	-0.497
WDR4	-0.568787	-0.425178	-0.496983
RBM38	-0.554578	-0.439323	-0.496951
CLUH	-0.469606	-0.521838	-0.495722
LRPAP1	-0.421583	-0.569776	-0.495679
PITHD1	-0.316815	-0.674008	-0.495412
ZMYND19	-0.331097	-0.659588	-0.495343
IMPDH1	-0.65471	-0.335869	-0.49529
SFPQ	-0.183924	-0.80618	-0.495052
IMP4	-0.514236	-0.474953	-0.494595
TSPAN5	-0.401136	-0.586463	-0.493799
RBM15B	-0.420885	-0.563731	-0.492308
MRPL14	-0.31101	-0.672668	-0.491839
CXorf38	-0.390465	-0.59301	-0.491738
MRPS12	-0.427719	-0.555492	-0.491605
PLD6	-0.423571	-0.556354	-0.489963
SUN1	-0.272317	-0.703873	-0.488095
FDPS	-0.309069	-0.665336	-0.487203
PIK3R1	-0.505735	-0.462783	-0.484259
ERMP1	-0.287684	-0.678531	-0.483108
LRP11	-0.406767	-0.558575	-0.482671
AIF1L	-0.375604	-0.58825	-0.481927
CRY2	-0.493431	-0.470386	-0.481908
PJA1	-0.391172	-0.57044	-0.480806
GTF3C4	-0.252185	-0.703205	-0.477695
HAUS7	-0.380126	-0.574692	-0.477409
PDIA4	-0.375565	-0.575704	-0.475634
TNFRSF10D	-0.64794	-0.302864	-0.475402
PANK3	-0.318416	-0.630925	-0.47467
IFNGR2	-0.360856	-0.587958	-0.474407
ZNF337	-0.396672	-0.551522	-0.474097
DUSP6	-0.52608	-0.421801	-0.473941
XRCC3	-0.552563	-0.392317	-0.47244
NSDHL	-0.244198	-0.700555	-0.472377
FKBP9	-0.445592	-0.49897	-0.472281
PPIB	-0.347858	-0.595878	-0.471868
LAMTOR4	-0.344753	-0.597512	-0.471133
FAM136A	-0.340254	-0.600761	-0.470507
CTSL2	-0.394491	-0.545897	-0.470194
STAT6	-0.362335	-0.575973	-0.469154
LRWD1	-0.477399	-0.46081	-0.469105
ZNF335	-0.519696	-0.416045	-0.46787
NDUFA8	-0.335267	-0.600452	-0.467859
PDCD6	-0.198297	-0.736677	-0.467487
ARHGEF16	-0.405312	-0.529324	-0.467318
PTPRF	-0.400197	-0.530681	-0.465439
RPL18	-0.254904	-0.675311	-0.465107
ANAPC11	-0.352685	-0.575601	-0.464143
METTL22	-0.497401	-0.429028	-0.463215
YIF1A	-0.373633	-0.552448	-0.46304
LMTK2	-0.464757	-0.460551	-0.462654
ZDHHC7	-0.268529	-0.655251	-0.46189
SDC3	-0.538822	-0.377392	-0.458107
ELOF1	-0.560298	-0.355212	-0.457755
GALNS	-0.483613	-0.431808	-0.45771
LRFN4	-0.583788	-0.330803	-0.457296
SLC31A2	-0.260321	-0.653744	-0.457033
ITGB1	-0.287976	-0.624068	-0.456022
RPS19	-0.328594	-0.58333	-0.455962
ATXN7L3	-0.484487	-0.426508	-0.455498
ABT1	-0.364385	-0.545787	-0.455086
RPL7L1	-0.336973	-0.572391	-0.454682
RAB35	-0.398068	-0.510826	-0.454447
MLX	-0.348286	-0.556347	-0.452316
PTK7	-0.427749	-0.474419	-0.451084
AKAP8L	-0.478136	-0.417157	-0.447646
EEF2	-0.417554	-0.477332	-0.447443
TBRG4	-0.269726	-0.623663	-0.446694
THSD4	-0.635227	-0.257878	-0.446552
BRD2	-0.237317	-0.655042	-0.446179
BSG	-0.358623	-0.533386	-0.446004
SAP30BP	-0.262115	-0.625679	-0.443897
ANKRD11	-0.4405	-0.446924	-0.443712
OGFOD3	-0.489385	-0.395928	-0.442657
CCDC142	-0.458846	-0.425163	-0.442004
FBLN2	-0.585615	-0.297415	-0.441515
HNRNPF	-0.223951	-0.652601	-0.438276
UBE2J2	-0.402907	-0.473322	-0.438115
CALR	-0.324246	-0.55087	-0.437558
NEFH	-0.531853	-0.342338	-0.437095
CDK10	-0.469872	-0.403514	-0.436693
MAEA	-0.326152	-0.545792	-0.435972
CHMP1A	-0.430638	-0.438217	-0.434427
KCTD2	-0.361958	-0.503218	-0.432588
CYFIP1	-0.291151	-0.570688	-0.43092
PTDSS1	-0.298843	-0.56126	-0.430051
CHPF2	-0.450572	-0.408768	-0.42967
SSH3	-0.423306	-0.434152	-0.428729
WDR1	-0.204829	-0.652607	-0.428718
SLC7A5	-0.548198	-0.304949	-0.426573
MRTO4	-0.282473	-0.568387	-0.42543
RPL10	-0.249628	-0.600032	-0.42483
C9orf114	-0.464785	-0.380205	-0.422495
DHX37	-0.507876	-0.336406	-0.422141
CPSF3L	-0.439361	-0.402575	-0.420968
BAK1	-0.437652	-0.403938	-0.420795
MRPS26	-0.391364	-0.448428	-0.419896
ADRM1	-0.514878	-0.323865	-0.419372
RPS3	-0.218291	-0.616357	-0.417324
NSRP1	-0.367876	-0.464083	-0.415979
ZDHHC12	-0.424119	-0.407416	-0.415767
GOLGA3	-0.468909	-0.362403	-0.415656
RUNDC1	-0.37917	-0.450181	-0.414676
RPS18	-0.221253	-0.606764	-0.414008
RPS23	-0.187562	-0.640032	-0.413797
MAGED2	-0.314901	-0.511637	-0.413269
DDIT4	-0.550928	-0.272562	-0.411745
OGDH	-0.22916	-0.593191	-0.411175
MLLT6	-0.542408	-0.276146	-0.409277
CRKL	-0.235162	-0.581281	-0.408222
ARHGEF1	-0.427605	-0.386847	-0.407226
RBM15	-0.40042	-0.413316	-0.406868
CDH3	-0.229717	-0.583323	-0.40652
MTRR	-0.246513	-0.565132	-0.405823
INO80	-0.271018	-0.53742	-0.404219
BRPF1	-0.386047	-0.422282	-0.404164
BCAP31	-0.467427	-0.340021	-0.403724
FKBP10	-0.30898	-0.496273	-0.402627
E4F1	-0.391602	-0.411882	-0.401742
UBL4A	-0.54903	-0.253853	-0.401441
TRAF3IP2	-0.376053	-0.424616	-0.400334
MYO18A	-0.524248	-0.275758	-0.400003
PYCR1	-0.425607	-0.369975	-0.397791
FTSJ3	-0.507394	-0.288065	-0.39773
RPL27A	-0.213333	-0.580454	-0.396894
VPS37B	-0.289699	-0.500754	-0.395226
UQCRH	-0.273752	-0.514763	-0.394257
ZNF133	-0.357092	-0.426083	-0.391588
SLK	-0.191234	-0.591713	-0.391473
KEAP1	-0.449994	-0.332843	-0.391419
RPS6	-0.229283	-0.553174	-0.391229
MYO10	-0.340568	-0.441602	-0.391085
FOXK1	-0.536207	-0.245383	-0.390795
PURB	-0.222534	-0.558684	-0.390609
ADH5	-0.232144	-0.54851	-0.390327
PRMT2	-0.285296	-0.491911	-0.388604
FAM115A	-0.281613	-0.495174	-0.388394
ACTB	-0.248717	-0.52571	-0.387214
HRAS	-0.364602	-0.409114	-0.386858
MAP7D1	-0.404654	-0.368988	-0.386821
LTBR	-0.300117	-0.470435	-0.385276
PFDN1	-0.354623	-0.411204	-0.382914
SKI	-0.448017	-0.317055	-0.382536
C9orf3	-0.377554	-0.386583	-0.382068
DCTN1	-0.441284	-0.322424	-0.381854
RRAGA	-0.300091	-0.460378	-0.380235
SF3B5	-0.362276	-0.395021	-0.378649
RPL28	-0.199053	-0.557041	-0.378047
ATXN1L	-0.362267	-0.393293	-0.37778
IRS1	-0.447725	-0.305747	-0.376736
DHCR24	-0.39986	-0.352327	-0.376094
SGTA	-0.427708	-0.321688	-0.374698
RPL7A	-0.18146	-0.566642	-0.374051
PPIA	-0.16055	-0.586545	-0.373547
SNTB2	-0.334847	-0.409745	-0.372296
SRRT	-0.481255	-0.259067	-0.370161
POR	-0.369607	-0.36839	-0.368998
DKC1	-0.186498	-0.549716	-0.368107
LEPREL4	-0.393894	-0.341126	-0.36751
EPB41	-0.403308	-0.329556	-0.366432
CAPN1	-0.276209	-0.456393	-0.366301
PUF60	-0.313954	-0.417792	-0.365873
CTSF	-0.435996	-0.292946	-0.364471
RPL11	-0.165153	-0.563586	-0.36437
SERPINH1	-0.34859	-0.37796	-0.363275
C19orf10	-0.372035	-0.350368	-0.361201
HS6ST1	-0.334798	-0.387429	-0.361114
FLOT2	-0.410534	-0.308261	-0.359398
RNF213	-0.427351	-0.288937	-0.358144
DNAJC5	-0.433286	-0.281266	-0.357276
PHB	-0.384539	-0.328575	-0.356557
PREB	-0.398711	-0.314204	-0.356457
C16orf58	-0.353661	-0.357051	-0.355356
EXT1	-0.240367	-0.468237	-0.354302
NCOA3	-0.224893	-0.48174	-0.353316
SCARNA12	-0.366869	-0.33901	-0.35294
CCDC86	-0.360601	-0.344562	-0.352581
ACTN1	-0.17549	-0.526919	-0.351205
UQCRC1	-0.330162	-0.370158	-0.35016
EXTL3	-0.270266	-0.428393	-0.34933
NDUFV1	-0.41717	-0.281406	-0.349288
PPP1R18	-0.403239	-0.294989	-0.349114
ARFGAP1	-0.405693	-0.292036	-0.348865
RAB1B	-0.31729	-0.378188	-0.347739
CARHSP1	-0.346646	-0.346196	-0.346421
HLA-A	-0.424565	-0.264216	-0.344391
TMEM43	-0.295806	-0.390183	-0.342995
MVP	-0.306187	-0.372405	-0.339296
PLXNA1	-0.468281	-0.209292	-0.338786
PSAP	-0.446067	-0.230334	-0.3382
MOGS	-0.407155	-0.268256	-0.337705
EHBP1L1	-0.442817	-0.231711	-0.337264
RPL12	-0.161711	-0.511865	-0.336788
PCYT1A	-0.284853	-0.387331	-0.336092
DRG2	-0.30027	-0.366322	-0.333296
AKAP1	-0.286509	-0.378433	-0.332471
PSMB1	-0.209741	-0.455112	-0.332426
BASP1	-0.291923	-0.37205	-0.331986
GET4	-0.334244	-0.329717	-0.331981
H2AFX	-0.29518	-0.368752	-0.331966
DDRGK1	-0.375323	-0.286887	-0.331105
ACIN1	-0.24901	-0.412734	-0.330872
ARPC5L	-0.233566	-0.42788	-0.330723
PPIH	-0.330548	-0.328276	-0.329412
HNRNPC	-0.224711	-0.433608	-0.32916
CUL4A	-0.196722	-0.461525	-0.329123
RPS8	-0.168646	-0.489377	-0.329011
LANCL1	-0.238427	-0.415144	-0.326786
PCDH7	-0.299869	-0.350698	-0.325284
TMEM219	-0.345015	-0.304649	-0.324832
NOP14	-0.305633	-0.344019	-0.324826
DUSP10	-0.34645	-0.301359	-0.323905
NNT	-0.16142	-0.486062	-0.323741
PAGR1	-0.336509	-0.303837	-0.320173
SNRPB	-0.186099	-0.441662	-0.31388
ARHGDIA	-0.323117	-0.301819	-0.312468
CHST2	-0.31773	-0.304806	-0.311268
TMEM259	-0.349534	-0.271419	-0.310477
DOCK1	-0.289534	-0.326895	-0.308214
PDXDC1	-0.319963	-0.296361	-0.308162
LETM1	-0.322641	-0.290035	-0.306338
PSMG3	-0.334879	-0.276529	-0.305704
44448	-0.269809	-0.340096	-0.304953
URGCP	-0.32369	-0.277622	-0.300656
B4GALT2	-0.297245	-0.300189	-0.298717
TUBA1C	-0.224818	-0.370534	-0.297676
GALNT2	-0.223235	-0.372075	-0.297655
LGALS1	-0.213605	-0.376917	-0.295261
POLR2L	-0.293421	-0.29354	-0.29348
TCEB3	-0.322147	-0.2648	-0.293474
POLE3	-0.188224	-0.395379	-0.291802
ITFG3	-0.316535	-0.266699	-0.291617
ATRN	-0.353882	-0.222993	-0.288437
NUDCD3	-0.265486	-0.308859	-0.287172
ARF1	-0.202652	-0.368538	-0.285595
FKBP8	-0.319787	-0.250569	-0.285178
MECP2	-0.347497	-0.219809	-0.283653
RRP1B	-0.322964	-0.244301	-0.283632
RPL8	-0.161809	-0.405223	-0.283516
HSPA1B	-0.243814	-0.318673	-0.281244
TRAF7	-0.328539	-0.230799	-0.279669
WDR5	-0.246661	-0.309189	-0.277925
UBE2Q1	-0.269589	-0.284769	-0.277179
PGAM5	-0.273933	-0.278404	-0.276169
SNRNP70	-0.328385	-0.222569	-0.275477
MDN1	-0.299515	-0.248616	-0.274065
TMEM141	-0.266802	-0.269722	-0.268262
OSBPL2	-0.288027	-0.245565	-0.266796
GDI1	-0.2421	-0.289564	-0.265832
ATP6V0B	-0.251468	-0.278662	-0.265065
CSNK2A1	-0.182693	-0.343065	-0.262879
MLF2	-0.286627	-0.235358	-0.260992
PPP4C	-0.269068	-0.251809	-0.260439
CD2BP2	-0.251392	-0.265441	-0.258416
MFN2	-0.294434	-0.218961	-0.256698
CTTN	-0.220685	-0.287105	-0.253895
CDK12	-0.255046	-0.244855	-0.249951
CDS2	-0.21915	-0.280292	-0.249721
NDUFS6	-0.240748	-0.258435	-0.249592
CALM3	-0.28916	-0.196999	-0.243079
IDH3B	-0.256963	-0.220049	-0.238506
EIF3B	-0.198135	-0.278328	-0.238231
NPLOC4	-0.191507	-0.282808	-0.237157
PSMA7	-0.208854	-0.232484	-0.220669
TUFM	-0.224533	-0.211111	-0.217822
APMAP	-0.215338	-0.191975	-0.203657
ARHGEF12	-0.221468	-0.185251	-0.203359
CNN2	-0.210719	-0.182868	-0.196793
ENO1	-0.174802	-0.208578	-0.19169
EIF5	0.216175	0.207509	0.211842
PHF20L1	0.21667	0.208576	0.212623
KPNA2	0.184328	0.241043	0.212685
MALL	0.218491	0.224173	0.221332
CDV3	0.283882	0.164189	0.224036
SS18	0.222229	0.233359	0.227794
MED13	0.236547	0.219622	0.228084
PHLDB2	0.239435	0.218019	0.228727
PSMC1	0.221384	0.241068	0.231226
GHITM	0.266225	0.196887	0.231556
MCM4	0.308015	0.159588	0.233802
PSMD7	0.252188	0.224351	0.238269
SPG21	0.254653	0.222638	0.238645
SF3B1	0.186281	0.293647	0.239964
KPNA4	0.272642	0.213774	0.243208
ITPR2	0.241239	0.24611	0.243675
PPP1CC	0.286783	0.201378	0.24408
GGCT	0.253945	0.236998	0.245471
RAB14	0.256978	0.234652	0.245815
CACYBP	0.224902	0.268257	0.24658
ATP2C1	0.193063	0.303074	0.248069
SCARB2	0.270545	0.226789	0.248667
IGFBP3	0.306709	0.191961	0.249335
FADS1	0.231423	0.268306	0.249865
CTNNA1	0.323116	0.180457	0.251787
EXOC1	0.27379	0.231748	0.252769
ZNF410	0.232119	0.274996	0.253558
ACTL6A	0.306252	0.207296	0.256774
KITLG	0.343777	0.170964	0.257371
ESRP1	0.214109	0.303287	0.258698
YME1L1	0.280807	0.237847	0.259327
PAFAH1B1	0.23267	0.288454	0.260562
44446	0.274341	0.248435	0.261388
HDAC2	0.23755	0.291869	0.26471
ZNF148	0.242716	0.286829	0.264772
SEMA3C	0.304795	0.22652	0.265658
SMC2	0.251887	0.279761	0.265824
MIB1	0.228878	0.304692	0.266785
STAG2	0.222956	0.310654	0.266805
NCBP1	0.303303	0.230959	0.267131
XRN1	0.227413	0.309748	0.26858
PSMB2	0.289576	0.253564	0.27157
MATR3	0.274923	0.268592	0.271757
FANCI	0.274989	0.26939	0.27219
AKAP10	0.258296	0.287494	0.272895
UBA2	0.334364	0.215927	0.275146
DESI2	0.354441	0.197469	0.275955
CD59	0.297942	0.263257	0.280599
UBE2C	0.258766	0.305089	0.281927
PSMA6	0.308984	0.259226	0.284105
TOP2A	0.212331	0.362218	0.287274
CAPN7	0.28032	0.295126	0.287723
B2M	0.358019	0.219101	0.28856
TRAPPC8	0.258372	0.319237	0.288804
PCNXL4	0.265523	0.315567	0.290545
PRSS23	0.297785	0.283879	0.290832
RAP2A	0.376786	0.205574	0.29118
HNRNPK	0.158585	0.425398	0.291992
DDX46	0.280405	0.30529	0.292848
HMGN1	0.384053	0.203128	0.293591
RRM1	0.392875	0.197512	0.295194
ANXA2	0.357733	0.236126	0.296929
IARS	0.388358	0.205834	0.297096
DCP2	0.297788	0.297496	0.297642
SNX3	0.213122	0.382848	0.297985
CNOT11	0.356087	0.240469	0.298278
TOR1AIP2	0.214496	0.382297	0.298396
CLTA	0.21349	0.3843	0.298895
PTPRK	0.288513	0.309874	0.299194
ARHGAP5	0.327702	0.272151	0.299927
EIF4G2	0.364477	0.237197	0.300837
ENOPH1	0.351298	0.251392	0.301345
PTGES3	0.383486	0.223804	0.303645
CCNB1	0.33761	0.273368	0.305489
KTN1	0.265297	0.346994	0.306146
MON2	0.32941	0.282988	0.306199
CDS1	0.346347	0.267187	0.306767
HN1	0.303864	0.313187	0.308526
TOPBP1	0.225881	0.397262	0.311571
PLK4	0.327039	0.29675	0.311895
PRKDC	0.211073	0.412925	0.311999
PRKAA1	0.401889	0.222205	0.312047
PAIP1	0.34107	0.286375	0.313722
PAPOLA	0.397104	0.233242	0.315173
NUP160	0.272121	0.366802	0.319462
STAU1	0.252249	0.387115	0.319682
ORC3	0.387655	0.252026	0.319841
KIAA1143	0.333386	0.307087	0.320236
44441	0.329481	0.312317	0.320899
MCM3	0.284904	0.357013	0.320958
TPM3	0.37084	0.273589	0.322214
ARFGEF2	0.21157	0.433504	0.322537
SGPP1	0.355286	0.289865	0.322576
ASCC3	0.407004	0.239105	0.323054
COPS3	0.42728	0.219379	0.323329
MEF2A	0.274079	0.380983	0.327531
RBL1	0.364655	0.290494	0.327575
MAD2L1	0.391831	0.264279	0.328055
KCMF1	0.229056	0.42794	0.328498
RAD18	0.318438	0.338782	0.32861
NDFIP1	0.383312	0.274558	0.328935
TIPRL	0.341596	0.320256	0.330926
GSTCD	0.374392	0.289464	0.331928
ASPH	0.208892	0.45543	0.332161
MCTS1	0.364821	0.303727	0.334274
CSDE1	0.330135	0.339117	0.334626
NBN	0.371803	0.304556	0.33818
HIST1H1C	0.299844	0.376605	0.338224
FAM120A	0.296916	0.379706	0.338311
ANO6	0.185399	0.491518	0.338458
LDHA	0.28815	0.389565	0.338858
VBP1	0.48417	0.194098	0.339134
ZFR	0.211032	0.467825	0.339429
TSPAN13	0.35004	0.329736	0.339888
CDC27	0.29586	0.385635	0.340747
YWHAB	0.350825	0.333616	0.34222
KRTCAP2	0.398858	0.286679	0.342768
GINM1	0.370738	0.316137	0.343437
FNBP4	0.345525	0.343585	0.344555
RBBP4	0.293648	0.398018	0.345833
SLFN5	0.303455	0.39248	0.347968
PPP1R15A	0.297003	0.399354	0.348178
VMA21	0.52149	0.175329	0.348409
MCM5	0.243732	0.453397	0.348564
REXO2	0.229532	0.469651	0.349591
METTL9	0.362729	0.338867	0.350798
FAM135A	0.356935	0.345309	0.351122
MKLN1	0.268538	0.434402	0.35147
RHOD	0.235202	0.468377	0.351789
HIST1H3F	0.400444	0.303328	0.351886
RAB3GAP2	0.398326	0.310575	0.35445
TMED5	0.343842	0.365318	0.35458
EIF2AK3	0.367847	0.345773	0.35681
HMGN2	0.334055	0.381054	0.357555
CENPN	0.513111	0.207847	0.360479
DHX36	0.340928	0.380246	0.360587
TSPAN3	0.255509	0.467639	0.361574
ABCB10	0.400486	0.323125	0.361806
CDCA7L	0.357823	0.36588	0.361852
MMS22L	0.398033	0.326628	0.36233
GLCE	0.350967	0.378513	0.36474
NHLRC2	0.389694	0.342981	0.366338
ATP6V1C1	0.279809	0.45454	0.367174
HS2ST1	0.270513	0.464269	0.367391
HIST1H2AI	0.473606	0.262011	0.367808
EHF	0.326167	0.41164	0.368903
PTPN9	0.365248	0.372635	0.368942
PRKCI	0.422372	0.316254	0.369313
STARD3NL	0.339973	0.400275	0.370124
ADSS	0.397024	0.344329	0.370676
PPP2R5C	0.411086	0.330719	0.370903
PCNA	0.478774	0.263481	0.371127
AGPS	0.31496	0.429283	0.372122
EIF4EBP2	0.376022	0.371313	0.373667
OSBPL3	0.343806	0.403948	0.373877
JAK1	0.277757	0.471644	0.374701
OGFRL1	0.373696	0.376498	0.375097
MSH2	0.392978	0.358458	0.375718
HIATL1	0.382004	0.371365	0.376685
BAG2	0.353414	0.400897	0.377156
CEP135	0.300766	0.458029	0.379397
TMED10	0.364893	0.39686	0.380876
CNPY2	0.367367	0.397456	0.382411
CLIP4	0.329515	0.437174	0.383345
C5orf42	0.426106	0.340864	0.383485
CMTM6	0.500218	0.269037	0.384628
FXR1	0.282291	0.487557	0.384924
SLC25A24	0.379048	0.391078	0.385063
SMAD4	0.346109	0.428283	0.387196
TRIM24	0.359139	0.416883	0.388011
COPRS	0.305094	0.471254	0.388174
CDC42SE2	0.410641	0.366068	0.388355
HLTF	0.519212	0.257647	0.388429
HIF1A	0.326859	0.450131	0.388495
TPMT	0.377877	0.404793	0.391335
DEK	0.516834	0.266205	0.391519
HSP90AA1	0.381303	0.402844	0.392073
H2AFV	0.244487	0.540449	0.392468
ZDHHC20	0.214016	0.571261	0.392639
SMAD2	0.274003	0.513517	0.39376
COPS4	0.474985	0.314156	0.394571
SKP1	0.426508	0.363021	0.394764
NUCKS1	0.268201	0.521695	0.394948
RB1CC1	0.372208	0.418684	0.395446
STMN1	0.264053	0.527766	0.39591
TMEM106C	0.322352	0.471092	0.396722
DDX47	0.517408	0.278724	0.398066
DNAJB6	0.274408	0.523198	0.398803
SP3	0.44952	0.350974	0.400247
ZMYND11	0.296714	0.504998	0.400856
PCDH1	0.42642	0.375873	0.401146
CPSF2	0.401081	0.404448	0.402765
FNBP1L	0.303714	0.505551	0.404632
NPAT	0.410488	0.400032	0.40526
TXNRD1	0.269074	0.542043	0.405558
PSMD14	0.391331	0.422046	0.406688
CETN2	0.32739	0.486073	0.406732
HSPA13	0.476113	0.337464	0.406788
POLD3	0.385037	0.429887	0.407462
FNIP1	0.391099	0.427132	0.409116
SRP14	0.370818	0.448673	0.409745
SPIRE1	0.403043	0.417804	0.410423
RAB28	0.420661	0.402716	0.411689
CKS2	0.381576	0.441802	0.411689
BROX	0.384003	0.440253	0.412128
SGOL2	0.382146	0.442112	0.412129
ZFYVE16	0.50441	0.320853	0.412632
SRBD1	0.369216	0.45606	0.412638
RAB9A	0.425359	0.40044	0.4129
ARFGAP3	0.426343	0.400183	0.413263
GTF2A1	0.329626	0.498367	0.413997
IQCB1	0.321504	0.506629	0.414066
SEC63	0.389634	0.438556	0.414095
RICTOR	0.313363	0.514881	0.414122
FBXO5	0.51811	0.310637	0.414374
VPS26A	0.471681	0.360375	0.416028
RCN1	0.326971	0.505552	0.416262
CENPI	0.412585	0.422768	0.417677
BRCC3	0.402468	0.433293	0.41788
DYNLT3	0.470177	0.36784	0.419009
RFC1	0.240224	0.598635	0.41943
MAPK9	0.462764	0.376868	0.419816
GTF3A	0.323015	0.517443	0.420229
TRIM25	0.273189	0.56771	0.42045
RRAS2	0.611088	0.231696	0.421392
FZD4	0.52314	0.320513	0.421826
PPIP5K2	0.388273	0.455779	0.422026
ATP6V1H	0.306733	0.537448	0.422091
WDR34	0.267134	0.578178	0.422656
ELOVL5	0.440979	0.406452	0.423715
WWP1	0.409699	0.438596	0.424148
PRKAB2	0.39954	0.448863	0.424201
FBXO11	0.406691	0.44253	0.424611
SOAT1	0.343405	0.50647	0.424938
ECT2	0.499468	0.350748	0.425108
MAP4K3	0.415394	0.435647	0.425521
RAD50	0.303482	0.547596	0.425539
NCKAP1	0.36669	0.484615	0.425653
RMND5A	0.317349	0.536648	0.426999
PHC3	0.251091	0.603578	0.427334
USP9X	0.280525	0.577218	0.428871
ZFP36L1	0.536037	0.322564	0.429301
CDC20	0.247278	0.612222	0.42975
IDH1	0.359006	0.502016	0.430511
PNPLA8	0.437407	0.425203	0.431305
TMEM138	0.450266	0.413417	0.431841
TSEN15	0.587028	0.277555	0.432292
MORF4L1	0.282955	0.581926	0.43244
GSPT1	0.342068	0.523054	0.432561
B4GALT4	0.349757	0.516581	0.433169
WEE1	0.417132	0.449299	0.433216
PDS5A	0.349755	0.517932	0.433844
WDR44	0.397814	0.471663	0.434738
NAA10	0.307996	0.561779	0.434888
ARAP2	0.489397	0.381456	0.435426
HSBP1L1	0.440026	0.431806	0.435916
LBR	0.234385	0.63746	0.435923
GBF1	0.380669	0.493074	0.436872
GDE1	0.371877	0.50388	0.437878
MLH1	0.415108	0.462073	0.438591
TRIO	0.164492	0.712911	0.438702
PRIM2	0.387184	0.490362	0.438773
FUCA2	0.48	0.39819	0.439095
USPL1	0.494205	0.386078	0.440141
EMB	0.459242	0.424452	0.441847
APOOL	0.520428	0.366148	0.443288
GPCPD1	0.568969	0.318662	0.443815
EFHA1	0.560846	0.330029	0.445437
ESYT2	0.441095	0.451701	0.446398
PLK2	0.466348	0.426906	0.446627
CNTLN	0.415237	0.480766	0.448001
RSRC2	0.394664	0.501812	0.448238
STRN	0.418145	0.478357	0.448251
TOP2B	0.325183	0.575175	0.450179
LOC100507217	0.497176	0.404177	0.450677
FMR1	0.359782	0.543625	0.451703
WDR26	0.343493	0.562693	0.453093
CTDSPL	0.312361	0.595035	0.453698
BRCA2	0.562006	0.346712	0.454359
ZW10	0.436232	0.476406	0.456319
SPECC1	0.361757	0.552494	0.457126
TSC22D1	0.567754	0.3467	0.457227
ATG3	0.499196	0.415483	0.457339
FAM96A	0.564213	0.357577	0.460895
SUCO	0.303392	0.619312	0.461352
OXCT1	0.502764	0.421153	0.461958
TMEM126B	0.539757	0.384336	0.462047
44262	0.42861	0.498143	0.463377
SMURF2	0.381331	0.546086	0.463709
CCDC132	0.37971	0.548164	0.463937
CLIC4	0.612369	0.316195	0.464282
NKTR	0.335191	0.594695	0.464943
TNKS2	0.382538	0.547354	0.464946
SOS2	0.389619	0.546825	0.468222
SPATS2L	0.392168	0.544865	0.468517
SMAP1	0.550149	0.386994	0.468571
FAF1	0.338153	0.601757	0.469955
PRPS2	0.569105	0.372117	0.470611
UBR7	0.437304	0.504198	0.470751
PEX3	0.508806	0.4329	0.470853
AAGAB	0.414182	0.527577	0.470879
SHCBP1	0.357818	0.58781	0.472814
TMEM30A	0.452909	0.49434	0.473625
RNF19B	0.55206	0.398345	0.475203
ICMT	0.311696	0.639134	0.475415
FGD6	0.474859	0.478068	0.476464
TIGD2	0.419415	0.534285	0.47685
ADAM10	0.443587	0.510776	0.477181
RBM7	0.58934	0.366208	0.477774
NMI	0.448857	0.507215	0.478036
CD24	0.483969	0.473259	0.478614
NSF	0.418895	0.538907	0.478901
C12orf75	0.435928	0.521971	0.478949
CHD9	0.458857	0.500027	0.479442
HIST1H2BH	0.523263	0.435734	0.479498
AGTPBP1	0.408012	0.551055	0.479533
TPM1	0.403786	0.557776	0.480781
FAM111A	0.301144	0.660916	0.48103
CDC42EP3	0.313712	0.648659	0.481186
SH3D19	0.371157	0.591835	0.481496
PRIM1	0.376622	0.586909	0.481766
LNX2	0.522211	0.441756	0.481983
DONSON	0.48822	0.476413	0.482317
DSCC1	0.636866	0.331612	0.484239
SUCLA2	0.558022	0.414098	0.48606
SCARNA5	0.461032	0.511502	0.486267
CNN3	0.489031	0.484866	0.486948
TMEM14B	0.64611	0.327929	0.48702
RNF19A	0.307062	0.666988	0.487025
SET	0.409044	0.565462	0.487253
CCNI	0.240237	0.735435	0.487836
EPCAM	0.555818	0.420025	0.487921
PSAT1	0.497421	0.480937	0.489179
POLK	0.386691	0.591722	0.489207
SLC36A4	0.441286	0.539227	0.490256
SGCB	0.411779	0.570694	0.491236
SAMD12	0.475212	0.509261	0.492237
DNAH5	0.611116	0.37463	0.492873
MBNL1	0.486494	0.499922	0.493208
DTL	0.398748	0.587871	0.493309
ALCAM	0.488336	0.498449	0.493392
AIMP2	0.462232	0.525071	0.493651
ATAD2	0.487049	0.500353	0.493701
CMSS1	0.494396	0.493554	0.493975
TGFBI	0.508713	0.481422	0.495067
STAT1	0.326499	0.664342	0.49542
MAT2B	0.348839	0.64232	0.49558
RWDD4	0.631585	0.361368	0.496476
USP1	0.512347	0.480638	0.496492
CTAGE5	0.521085	0.471983	0.496534
DHFR	0.585937	0.407788	0.496863
G2E3	0.397774	0.596181	0.496977
FEZ2	0.462607	0.531366	0.496987
ELL2	0.302365	0.692164	0.497264
EFEMP1	0.398512	0.596416	0.497464
YEATS4	0.640597	0.35487	0.497733
RHEB	0.394342	0.601686	0.498014
NFU1	0.405814	0.591396	0.498605
ANXA4	0.314402	0.683242	0.498822
ZRANB2	0.559386	0.439564	0.499475
MORC4	0.433807	0.573535	0.503671
IFRD1	0.675396	0.333555	0.504476
RNF11	0.511704	0.497371	0.504537
RPP30	0.416272	0.594551	0.505411
HDGF	0.240303	0.772188	0.506245
CD164	0.504034	0.50973	0.506882
TES	0.397284	0.616705	0.506994
RHOT1	0.393971	0.623933	0.508952
SMCR7	0.426212	0.592782	0.509497
GMPS	0.53675	0.484003	0.510377
NGLY1	0.436528	0.584783	0.510655
CYR61	0.454589	0.567497	0.511043
TLK1	0.417278	0.606446	0.511862
RAD54B	0.491483	0.532938	0.512211
MXD1	0.435432	0.589014	0.512223
DSG2	0.591019	0.435063	0.513041
PEA15	0.333887	0.693096	0.513491
BARD1	0.374525	0.653618	0.514072
WDFY1	0.424983	0.603205	0.514094
UBE2T	0.437452	0.590846	0.514149
HERC4	0.571855	0.457107	0.514481
RAB11FIP2	0.614766	0.415273	0.515019
MAP3K2	0.36646	0.665254	0.515857
UBL3	0.453594	0.578565	0.516079
PPP1CB	0.494619	0.537932	0.516275
KCNK1	0.469575	0.563416	0.516496
SMCHD1	0.393326	0.639916	0.516621
DLG1	0.723281	0.311677	0.517479
PARVA	0.361586	0.674953	0.518269
CEP128	0.450071	0.586513	0.518292
MAP1LC3B	0.66365	0.373502	0.518576
LOC541471	0.491073	0.546275	0.518674
CISD2	0.67642	0.361634	0.519027
ANKRD13C	0.44669	0.592433	0.519562
C2CD3	0.39494	0.644654	0.519797
TRIM59	0.52768	0.511968	0.519824
ZDHHC2	0.495684	0.546154	0.520919
UBE2R2	0.348599	0.69377	0.521184
ASAP2	0.482605	0.559983	0.521294
SCARNA21	0.500557	0.543143	0.52185
IDS	0.341616	0.703797	0.522707
SRP9	0.708372	0.338335	0.523354
DNAJC13	0.331595	0.716795	0.524195
TBC1D15	0.41199	0.637153	0.524572
RASA1	0.506793	0.546265	0.526529
NAMPT	0.58932	0.464458	0.526889
AGPAT9	0.599203	0.454742	0.526973
ASAH1	0.376881	0.677712	0.527297
ANKRD13A	0.483661	0.573068	0.528364
MDM2	0.344784	0.718217	0.531501
NPEPPS	0.527122	0.537044	0.532083
ATP6V1G1	0.574264	0.494285	0.534274
HDGFRP3	0.535477	0.533101	0.534289
SPATA5	0.477501	0.59118	0.534341
KRT18	0.290633	0.778508	0.534571
BRCA1	0.434186	0.636951	0.535568
SGOL1	0.490373	0.58341	0.536892
ZNF326	0.4159	0.660312	0.538106
TACC1	0.450335	0.629057	0.539696
FAS	0.487028	0.59264	0.539834
ARHGAP11A	0.280013	0.801509	0.540761
HSF2	0.662999	0.41896	0.54098
KIAA1715	0.339493	0.743715	0.541604
ABHD12	0.295631	0.789552	0.542591
EXO1	0.498112	0.587693	0.542903
KRT8	0.277022	0.809315	0.543168
CD109	0.610442	0.475898	0.54317
TIA1	0.562076	0.524804	0.54344
FAM200B	0.527361	0.562527	0.544944
SLC25A13	0.491083	0.600433	0.545758
CDKN3	0.589019	0.503205	0.546112
IDE	0.578668	0.5145	0.546584
SLC18A2	0.489692	0.604662	0.547177
TRAM1	0.52134	0.57628	0.54881
ZMYM5	0.536901	0.561102	0.549002
YY1	0.267779	0.834718	0.551249
CYLD	0.389284	0.714212	0.551748
MCFD2	0.436229	0.667701	0.551965
TPM2	0.365349	0.739265	0.552307
FAM92A1	0.504328	0.60154	0.552934
ATMIN	0.353821	0.752222	0.553022
THAP9-AS1	0.486821	0.61999	0.553406
CLSPN	0.394995	0.711906	0.553451
MASTL	0.466766	0.640978	0.553872
TXNDC16	0.51833	0.589835	0.554083
KLF3	0.524017	0.585841	0.554929
HPRT1	0.754478	0.355916	0.555197
RACGAP1	0.306536	0.804531	0.555534
CDC6	0.599527	0.514521	0.557024
SUZ12	0.456237	0.657971	0.557104
BAG1	0.371402	0.750746	0.561074
TMSB4X	0.457148	0.668922	0.563035
STRIP2	0.761552	0.366981	0.564267
PRRG1	0.469765	0.663218	0.566492
PKN2	0.478853	0.656998	0.567926
AHI1	0.460881	0.675845	0.568363
PPP2R5E	0.346472	0.792492	0.569482
MYOF	0.524564	0.615959	0.570261
CENPL	0.501792	0.64108	0.571436
ANLN	0.464508	0.679036	0.571772
PTEN	0.594697	0.549633	0.572165
NADKD1	0.464536	0.680689	0.572613
BTG3	0.692341	0.454569	0.573455
EPB41L2	0.413498	0.733497	0.573498
COTL1	0.31523	0.832162	0.573696
IBTK	0.584796	0.562942	0.573869
ZFAND5	0.491278	0.656879	0.574079
PLOD2	0.524355	0.623884	0.574119
CHMP2B	0.479204	0.669116	0.57416
ABHD5	0.804383	0.346	0.575192
ATP10D	0.496064	0.654543	0.575304
ERI1	0.487982	0.664025	0.576004
BNIP3L	0.312599	0.843961	0.57828
PCNP	0.645631	0.517089	0.58136
PCGF5	0.406813	0.758742	0.582777
MSANTD3	0.45551	0.710687	0.583099
BUB1	0.423013	0.744077	0.583545
SNORA71A	0.626455	0.541044	0.58375
CDC14B	0.368356	0.804387	0.586372
CEP152	0.418665	0.756894	0.58778
BIRC2	0.487233	0.690393	0.588813
HIST1H1D	0.424784	0.753018	0.588901
GPR126	0.515089	0.662852	0.588971
HEBP1	0.555296	0.623507	0.589401
MELK	0.610679	0.568422	0.589551
CCND3	0.431713	0.74763	0.589672
PHACTR2	0.449263	0.735103	0.592183
TARS	0.444659	0.744214	0.594436
TCEA1	0.566293	0.625277	0.595785
SKA3	0.470958	0.72253	0.596744
CHCHD3	0.391263	0.807608	0.599435
AP1S3	0.501797	0.697164	0.59948
VEZF1	0.449462	0.750596	0.600029
FDX1	0.82883	0.376816	0.602823
KIF11	0.447194	0.759821	0.603508
NCAPH	0.374212	0.836045	0.605129
RAP1A	0.60816	0.604828	0.606494
ELAVL2	0.426312	0.788248	0.60728
GLS	0.630808	0.583859	0.607333
GBE1	0.566912	0.649538	0.608225
UBE2E3	0.394709	0.82218	0.608444
FSTL3	0.430221	0.790348	0.610284
DENND4C	0.325661	0.895627	0.610644
H1F0	0.353001	0.874726	0.613864
SERPINB6	0.673399	0.555114	0.614256
KNSTRN	0.310518	0.920984	0.615751
C1GALT1	0.620257	0.611972	0.616114
GYG1	0.636172	0.59616	0.616166
SERTAD2	0.302321	0.930512	0.616417
EREG	0.824721	0.408243	0.616482
DBF4	0.564631	0.669993	0.617312
ABL2	0.484513	0.752161	0.618337
DZIP3	0.495272	0.741567	0.61842
TMEM19	0.60474	0.634453	0.619596
FAM175A	0.663704	0.576632	0.620168
SLC35A1	0.550137	0.691738	0.620938
SSFA2	0.374059	0.868061	0.62106
CKAP2L	0.364171	0.878231	0.621201
EFCAB2	0.637762	0.606069	0.621915
UROS	0.48708	0.758369	0.622725
PBK	0.50026	0.74628	0.62327
C6orf211	0.674372	0.572978	0.623675
FNDC3A	0.589408	0.658864	0.624136
NEDD4L	0.37608	0.8726	0.62434
CMC4	0.723045	0.526018	0.624531
CCRN4L	0.472124	0.780512	0.626318
CDK2AP1	0.555919	0.697743	0.626831
LIMCH1	0.37524	0.879934	0.627587
ATXN10	0.50925	0.74803	0.62864
RBMS2	0.480962	0.777684	0.629323
HPSE	0.688584	0.570581	0.629582
NEK7	1.03261	0.226723	0.629666
MECOM	0.508454	0.751717	0.630085
XPO1	0.348398	0.91429	0.631344
SUSD1	0.413618	0.851853	0.632735
LOC375295	0.724361	0.54469	0.634526
ARL4A	0.813474	0.456683	0.635079
TRNP1	0.729569	0.542783	0.636176
CFI	0.513429	0.759096	0.636262
LOC550112	0.474369	0.799934	0.637152
SKIL	0.69635	0.580203	0.638276
CCP110	0.415152	0.864299	0.639726
SPIN1	0.570758	0.709072	0.639915
TPX2	0.35051	0.930295	0.640403
GCSH	0.639974	0.64461	0.642292
ARRDC4	0.577646	0.707271	0.642459
44450	0.425724	0.861867	0.643795
CHML	0.436931	0.852985	0.644958
OSBPL1A	0.365877	0.924996	0.645436
DEPDC7	0.573056	0.719412	0.646234
PNRC2	0.624302	0.669765	0.647034
AP5S1	0.443843	0.850299	0.647071
EIF2AK2	0.437173	0.859568	0.64837
MLF1IP	0.568507	0.729042	0.648774
FAM120AOS	0.495517	0.803693	0.649605
SMC4	0.501472	0.79951	0.650491
C11orf71	0.604345	0.700005	0.652175
PARP9	0.337025	0.968927	0.652976
NME7	0.675654	0.635908	0.655781
NUF2	0.515524	0.796841	0.656183
CREM	0.628955	0.685118	0.657037
TJP1	0.510683	0.804489	0.657586
GOPC	0.429939	0.887475	0.658707
PPP3CA	0.61283	0.705687	0.659259
WWC1	0.441909	0.878441	0.660175
RAD21	0.509636	0.815953	0.662795
KIF20B	0.382886	0.943641	0.663263
TCF19	0.386234	0.940436	0.663335
CCDC50	0.274064	1.05296	0.66351
SNX16	0.774956	0.555743	0.66535
PDE4DIP	0.311481	1.02074	0.66611
LIN54	0.573751	0.760077	0.666914
KIFAP3	0.397564	0.937201	0.667382
SCRN1	0.395713	0.939437	0.667575
DEPDC1	0.481016	0.855787	0.668402
RAP1B	0.609849	0.728698	0.669274
BORA	0.422031	0.916557	0.669294
TUBGCP5	0.495942	0.842938	0.66944
ARHGAP32	0.368362	0.974406	0.671384
ITGB6	0.765426	0.578014	0.67172
ARHGDIB	0.489019	0.855953	0.672486
CDC42BPA	0.462195	0.882877	0.672536
CEP55	0.63235	0.713328	0.672839
NRP2	0.407812	0.938019	0.672916
HEATR5A	0.570214	0.780415	0.675315
MED7	0.674562	0.677119	0.675841
FAM169A	0.438896	0.917403	0.678149
SNORD97	0.498091	0.859421	0.678756
CENPC1	0.397181	0.964748	0.680964
STIL	0.549754	0.81433	0.682042
QKI	0.530995	0.834095	0.682545
TPD52	0.779329	0.592084	0.685706
HMMR	0.47827	0.893433	0.685852
LPIN2	0.460166	0.911617	0.685891
NFYB	0.518411	0.855466	0.686939
PCM1	0.431727	0.942729	0.687228
DDAH1	0.576794	0.798166	0.68748
CALM2	0.577641	0.797867	0.687754
TAB2	0.387825	0.988943	0.688384
ABCA12	0.725731	0.651418	0.688574
ABHD2	0.293922	1.08565	0.689787
ZNF367	0.650424	0.736567	0.693496
AURKA	0.454289	0.933273	0.693781
GBP3	0.588973	0.802583	0.695778
DENND1B	0.586399	0.807695	0.697047
EZH2	0.591323	0.803514	0.697419
LHFPL2	0.395974	1.00474	0.700359
RFK	0.808842	0.592703	0.700773
ANKRD28	0.517241	0.884706	0.700973
ARHGAP42	0.744042	0.659427	0.701734
KIAA1524	0.578634	0.826271	0.702453
NR3C1	0.420485	0.985659	0.703072
SKA1	0.678115	0.732117	0.705116
TWSG1	0.675028	0.736567	0.705797
KDELC2	0.519569	0.896468	0.708018
SNX10	0.624068	0.792215	0.708142
TBL1XR1	0.597111	0.819511	0.708311
PTP4A2	0.431745	0.988472	0.710109
C1orf112	0.642895	0.778469	0.710682
PHIP	0.406849	1.01559	0.711218
IRF2BP2	0.41455	1.01385	0.714199
SDCCAG8	0.458701	0.97101	0.714855
JMJD1C	0.595373	0.834662	0.715018
TM4SF1	0.96542	0.468203	0.716812
DOCK5	0.392726	1.04419	0.718457
TJP2	0.471271	0.969158	0.720215
RHNO1	0.481075	0.959567	0.720321
DNAJC1	0.588955	0.853669	0.721312
CEP57	0.473139	0.971612	0.722375
TMPO	0.532872	0.915181	0.724027
PTTG1IP	0.185272	1.26366	0.724464
MSRB3	0.854994	0.603203	0.729098
RPS27L	0.486713	0.976329	0.731521
LOC344595	0.703762	0.759406	0.731584
DIAPH3	0.627345	0.836986	0.732165
C4orf46	0.678192	0.786674	0.732433
MIS18BP1	0.40709	1.06364	0.735366
VPS13C	0.58129	0.890268	0.735779
DOPEY1	0.567607	0.906171	0.736889
FAM210B	0.634493	0.841588	0.73804
CDCA2	0.437563	1.04087	0.739216
NEK2	0.543726	0.940974	0.74235
LOC646719	0.447032	1.0385	0.742765
E2F1	0.449772	1.03636	0.743068
LOC100505633	0.82093	0.672823	0.746876
EPS15	0.747136	0.751013	0.749075
PDS5B	0.472253	1.02731	0.749781
MOSPD1	0.64288	0.857005	0.749942
NCOA1	0.491335	1.01018	0.750759
N4BP2	0.601156	0.902207	0.751682
MFSD1	0.437213	1.07225	0.754731
KLHL5	0.752846	0.757277	0.755062
SLCO1B3	0.779634	0.731082	0.755358
OPHN1	0.471233	1.04062	0.755924
CKAP2	0.467762	1.04411	0.755936
RAD51AP1	0.581849	0.931269	0.756559
SNORA23	0.687454	0.831971	0.759713
UBALD2	0.50829	1.0125	0.760393
ASAP1	0.440965	1.0845	0.762734
ATP2B1	0.608137	0.917678	0.762908
RRM2	0.726339	0.799733	0.763036
ZNF441	0.626888	0.90169	0.764289
ANXA5	0.49402	1.0405	0.767262
KIF24	0.49676	1.04264	0.7697
SH3BGRL2	0.783048	0.757414	0.770231
ESCO2	0.731008	0.809517	0.770263
FAM46A	0.518785	1.02562	0.772204
STRBP	0.604912	0.946247	0.77558
LINC00152	0.653375	0.904313	0.778844
LMO4	0.484112	1.07401	0.779063
FOXM1	0.361695	1.2059	0.783797
TRIB3	0.928158	0.640335	0.784247
CUL4B	0.471148	1.0983	0.784722
CTSA	0.258879	1.31106	0.784969
KCTD3	0.406854	1.17202	0.789437
RUFY3	0.551633	1.02884	0.790234
DHX32	0.574378	1.00933	0.791853
LOC100294145	0.70785	0.877799	0.792824
DAP	0.443274	1.14341	0.793341
FSTL1	0.548232	1.04746	0.797846
PPP2R3A	0.694119	0.901691	0.797905
PTPN12	0.752515	0.844127	0.798321
CD55	0.933573	0.666348	0.79996
LOC253039	0.454279	1.14627	0.800275
CENPF	0.20836	1.39766	0.80301
KIF23	0.719428	0.898692	0.80906
NEDD9	0.517494	1.10222	0.809857
CCND1	0.175594	1.45057	0.813084
HNRPLL	0.508788	1.11836	0.813574
NT5C2	0.653326	0.978272	0.815799
FAM107B	0.854143	0.778484	0.816313
ANKRD50	0.633497	0.999238	0.816368
HMGN3	0.683765	0.950023	0.816894
SSH2	0.396476	1.23893	0.817704
TRIM38	0.480097	1.15989	0.819995
UPP1	0.464109	1.1768	0.820454
DLC1	0.720114	0.926501	0.823308
DPYSL3	0.507623	1.1392	0.82341
JDP2	0.427355	1.21982	0.823589
TOMM34	0.579858	1.06769	0.823776
PHLPP1	0.493919	1.15427	0.824093
PLSCR1	0.525311	1.12325	0.824279
CFL2	0.711282	0.941726	0.826504
COL4A1	0.352211	1.30306	0.827635
GLCCI1	0.782135	0.874745	0.82844
NCEH1	0.891368	0.768808	0.830088
CCDC85C	0.328801	1.33178	0.830289
TGFBR2	0.507324	1.15817	0.832749
SMOX	0.768854	0.897299	0.833077
HJURP	0.496489	1.17344	0.834966
CDCA3	0.432005	1.23978	0.835892
SRD5A3	0.544504	1.13944	0.841973
PIK3R3	0.59499	1.08968	0.842337
BCL6	0.650882	1.03596	0.843421
GLRB	0.72402	0.963762	0.843891
CENPA	0.552529	1.13553	0.844029
ASPM	0.291362	1.39726	0.84431
GALNT7	0.62685	1.06403	0.84544
EGLN1	0.496018	1.19721	0.846614
CMBL	0.510743	1.18421	0.847478
ABHD10	0.545452	1.15239	0.848921
HCG4	0.718385	0.980406	0.849396
PLEKHO1	0.852555	0.847782	0.850169
RNF144B	0.488606	1.21188	0.850242
VGLL3	0.817839	0.886996	0.852418
PINK1	0.391717	1.31438	0.853049
SYT1	0.891035	0.828876	0.859955
SKAP2	0.644036	1.07657	0.860303
APOL6	0.520845	1.1998	0.860321
B4GALT1	0.715936	1.00593	0.860934
STMN3	0.675364	1.05323	0.864298
ERBB2IP	0.652465	1.07884	0.865652
SIX4	0.520603	1.21168	0.866143
TP53I3	0.924948	0.80737	0.866159
ADAM9	0.672048	1.06162	0.866836
TTC8	0.728884	1.01068	0.86978
SOX9	0.628048	1.11534	0.871693
CDK19	0.485604	1.26289	0.874249
SLC22A3	0.903227	0.847165	0.875196
STK17B	0.646855	1.10615	0.876505
ZNF165	0.704243	1.05209	0.878164
ALPK2	0.936075	0.820763	0.878419
UGP2	0.861964	0.896139	0.879051
DCBLD2	0.629991	1.13152	0.880757
CASK	0.639713	1.12593	0.882823
PLK1	0.393347	1.37567	0.884506
SNX7	0.659601	1.10968	0.884639
RRM2B	0.692862	1.0807	0.886781
HDAC9	0.639771	1.14041	0.890089
BMPR2	0.613298	1.17635	0.894823
MAP4K4	0.642144	1.14902	0.895582
GPR78	0.869328	0.924083	0.896706
UCA1	0.475403	1.32297	0.899188
LINC00346	0.587658	1.21271	0.900186
TMEM131	0.580662	1.22234	0.901503
STXBP5	0.590974	1.22168	0.90633
ASF1A	0.729386	1.08536	0.907375
GPRC5A	0.73849	1.0763	0.907394
LACTB2	0.91887	0.896494	0.907682
FH	0.493041	1.32344	0.90824
BBS10	0.707958	1.10868	0.908317
BEND6	0.716816	1.10112	0.908967
COL5A1	0.203552	1.6188	0.911174
NCAPG	0.701026	1.1295	0.915265
MPP5	0.521074	1.31154	0.916306
IKZF2	0.84936	0.98455	0.916955
DNAJB4	0.845951	1.00106	0.923505
COL4A2	0.314564	1.53472	0.924643
FAM171A1	0.644937	1.20615	0.925543
LGALS3	0.783391	1.06814	0.925764
USP25	0.720643	1.13258	0.926611
TMEM158	0.736711	1.11755	0.927132
PVRL3	0.762631	1.09281	0.927718
RASAL2	0.677721	1.17925	0.928486
MIR155HG	0.922647	0.935556	0.929102
SLC9A7	0.503468	1.3562	0.929832
CCNA2	0.728607	1.14056	0.934586
ABCC9	0.570632	1.29855	0.934592
NETO2	0.808714	1.0632	0.935956
USP13	0.468289	1.40851	0.9384
ONECUT2	0.721939	1.15772	0.939829
CLOCK	0.786012	1.09531	0.940663
PLAGL1	0.952346	0.933298	0.942822
MUC1	0.835023	1.05163	0.943327
UTRN	0.529726	1.35848	0.944105
SH3KBP1	0.784311	1.11846	0.951388
RMI1	0.946627	0.956952	0.95179
TBX3	0.76824	1.13606	0.95215
LIPA	0.659939	1.24501	0.952476
NUAK1	0.375331	1.53445	0.954892
CDKN2B	0.831418	1.08725	0.959332
SLC39A8	0.804602	1.11489	0.959743
IL6ST	0.735459	1.18681	0.961133
IRS2	0.509295	1.42256	0.965927
ABTB2	0.805454	1.1273	0.966375
RALGPS2	0.770017	1.16441	0.967213
BUB1B	0.535249	1.40357	0.969409
MYO5B	0.837474	1.10259	0.970033
FRMD6	0.72773	1.21491	0.971319
FAM171B	0.783391	1.16032	0.971853
STRADB	0.68254	1.26134	0.97194
LNX1	0.728169	1.22035	0.974261
RALA	0.806833	1.1494	0.978116
GOLM1	0.501506	1.45836	0.979934
ANTXR1	0.41783	1.55	0.983914
SRGAP2C	1.25204	0.721399	0.986721
DDX60	0.722402	1.25241	0.987408
RIMS2	1.24347	0.73231	0.987888
PAWR	0.69742	1.28545	0.991434
EPG5	0.437722	1.55271	0.995215
FTH1	0.572727	1.42297	0.99785
WDR62	0.472094	1.52601	0.999052
HMGB2	0.481181	1.51747	0.999323
CNR1	0.802849	1.19816	1.0005
FRMD5	0.825784	1.17887	1.00233
ITGA5	0.744411	1.27164	1.00803
CDKN1B	0.546845	1.47426	1.01055
CNKSR3	0.567974	1.45333	1.01065
HERC5	0.611915	1.42051	1.01621
STAC	0.539297	1.49386	1.01658
GALNT10	0.427965	1.60535	1.01666
TTK	0.611643	1.42452	1.01808
RAPGEF2	0.74547	1.29357	1.01952
SLC38A2	0.85357	1.18701	1.02029
PLAC8	0.900213	1.15244	1.02633
DDX58	0.665272	1.39329	1.02928
AOX1	1.14833	0.911066	1.0297
LOC100506394	0.614053	1.45147	1.03276
FUT8	0.778515	1.29928	1.0389
DCBLD1	0.735632	1.34556	1.0406
MDK	0.61989	1.4647	1.0423
AXL	0.606231	1.48026	1.04324
SLC16A7	0.894847	1.19786	1.04635
PIM1	0.527373	1.56777	1.04757
ABHD3	0.846295	1.25737	1.05183
SLC30A4	0.667411	1.44042	1.05392
CCBE1	1.07504	1.03651	1.05578
HSD17B2	1.02873	1.08461	1.05667
RASAL2-AS1	0.979784	1.14656	1.06317
CYP24A1	0.84319	1.28939	1.06629
DDIT3	1.06049	1.0812	1.07085
DENND5B	0.53226	1.61961	1.07594
EDIL3	0.87744	1.28453	1.08098
MDM1	0.76781	1.40737	1.08759
SNORA38	0.962825	1.21664	1.08973
WWC3	0.426852	1.761	1.09393
SGTB	0.703041	1.48848	1.09576
SPTLC3	0.818918	1.37526	1.09709
DPYD	0.915592	1.28166	1.09863
NEBL	0.698834	1.51037	1.1046
CCDC71L	0.843105	1.37387	1.10849
SFTA1P	1.07196	1.14978	1.11087
CABLES1	0.557258	1.67144	1.11435
NDC80	0.67092	1.56128	1.1161
ZSCAN12P1	0.942232	1.2903	1.11627
GTPBP2	0.672286	1.57192	1.1221
C15orf41	0.776783	1.46921	1.123
C5	0.784857	1.46842	1.12664
CDK14	0.712408	1.54805	1.13023
MARCKSL1	0.893944	1.37342	1.13368
CAMK2N1	0.912625	1.35627	1.13445
ACSL5	0.90509	1.3646	1.13484
C5orf34	0.66506	1.60699	1.13603
SHROOM3	0.524775	1.75141	1.13809
PTCHD4	0.837666	1.442	1.13983
DAAM1	0.800924	1.48182	1.14137
RBMS3	0.758837	1.55479	1.15681
LINC00707	1.35177	0.96265	1.15721
PVRL4	0.982337	1.3333	1.15782
ZNF114	0.423108	1.89276	1.15793
HYLS1	0.801128	1.51509	1.15811
PDGFC	1.01212	1.31069	1.1614
MDFIC	0.62955	1.69507	1.16231
F8	0.661644	1.66646	1.16405
HERC3	0.804146	1.52728	1.16571
DLG1-AS1	1.11108	1.22394	1.16751
FAM178A	0.705035	1.63918	1.17211
E2F7	1.08111	1.26577	1.17344
STEAP2	1.04701	1.30533	1.17617
TNFAIP2	0.790394	1.57038	1.18039
TAX1BP1	0.916492	1.44446	1.18047
SNAPC1	0.808025	1.56938	1.1887
[truncated: 190 more rows]

## Sheet: SCC104 sh2 DEGs
	baseMean	log2FoldChange	lfcSE	stat	pvalue	padj
GJB6	1385.84	-7.49312	0.310034	-24.1687	4.75042e-129	1.82474e-126
RPL3L	53.284	-7.36872	1.44371	-5.104	3.32544e-07	2.37624e-06
TREM2	18.921	-7.32537	1.55138	-4.72185	2.33707e-06	1.46991e-05
WTAPP1	18.5265	-7.29505	1.55467	-4.69235	2.70081e-06	1.68256e-05
TNNT2	17.9458	-7.24912	1.55848	-4.6514	3.2969e-06	2.033e-05
GJB2	1792.35	-7.12505	0.246618	-28.891	1.54797e-183	1.21895e-180
KRT75	309.75	-7.10735	0.573777	-12.387	3.07498e-35	1.47197e-33
IGFBP2	42.9693	-7.06287	1.45396	-4.8577	1.18759e-06	7.81913e-06
MMP1	1582.87	-6.94435	0.246692	-28.1498	2.40659e-174	1.80483e-171
MTUS2-AS1	11.7959	-6.64339	1.61757	-4.10703	4.00778e-05	0.000207014
WFDC5	10.9959	-6.54249	1.62771	-4.01944	5.83369e-05	0.000291944
ENDOU	51.4785	-6.30594	1.07684	-5.85597	4.74239e-09	4.32974e-08
OTOP2	7.53885	-5.99758	1.70465	-3.51836	0.000434222	0.00182605
LEMD1	7.51411	-5.9934	1.71678	-3.49107	0.000481088	0.00200494
FST	3385.65	-5.98623	0.139757	-42.8331	0	0
SNX31	6.57459	-5.80008	1.74171	-3.33011	0.000868114	0.00340776
NFASC	52.8546	-5.76585	0.902846	-6.3863	1.69942e-10	1.83066e-09
SLC10A6	84.4554	-5.70183	0.702415	-8.11747	4.76017e-16	8.6071e-15
LOC100505782	16.187	-5.62258	1.52964	-3.67575	0.000237151	0.00104942
MMP10	77.5221	-5.57586	0.708458	-7.87041	3.53467e-15	5.96652e-14
CPXM1	5.41033	-5.51902	1.79605	-3.07286	0.00212017	0.00757157
CREB5	144.319	-5.32753	0.48547	-10.974	5.09829e-28	1.80434e-26
CDHR1	52.337	-5.32141	0.806345	-6.59942	4.12759e-11	4.80454e-10
KRT16P1	4.62682	-5.29373	1.85626	-2.85182	0.00434694	0.0142744
MMP3	691.996	-5.21655	0.224765	-23.2089	3.70013e-119	1.21403e-116
KCNK10	4.25431	-5.1721	1.88518	-2.74356	0.00607765	0.0190785
RDH12	4.24606	-5.16964	1.88249	-2.74616	0.00602966	0.0189505
LGALS9C	50.3032	-5.1597	1.35399	-3.81074	0.000138553	0.000646729
SERPINB2	14363.1	-5.15748	0.0842792	-61.1952	0	0
DNASE1L3	4.05431	-5.10291	1.90036	-2.68524	0.00724781	0.0221901
KRT37	4.05156	-5.10205	1.90267	-2.68152	0.00732891	0.0224122
NGFR	953.086	-5.02986	0.18799	-26.756	1.05147e-157	5.71023e-155
CD1D	3.67355	-4.96038	1.94519	-2.55008	0.0107699	0.0313116
TCP10L	3.6708	-4.95943	1.94271	-2.55284	0.0106849	0.0311104
CA12	724.378	-4.92887	0.208146	-23.6799	5.8042e-124	2.03134e-121
IL24	171.023	-4.84883	0.409695	-11.8352	2.56685e-32	1.09554e-30
LGALS9B	28.0256	-4.81169	0.95399	-5.04375	4.56486e-07	3.19378e-06
EBF3	341.249	-4.80679	0.281777	-17.0589	3.00301e-65	3.37817e-63
CORO2B	3.28455	-4.79902	1.99399	-2.40675	0.0160954	0.044277
LHX3	3.27905	-4.79689	1.99767	-2.40124	0.0163396	0.0448158
ENTPD3	26.8558	-4.74737	0.961555	-4.93719	7.92581e-07	5.37569e-06
TUBAL3	3.09279	-4.71215	2.02513	-2.32684	0.0199736	0.0531628
CKMT1B	3.09279	-4.71215	2.02513	-2.32684	0.0199736	0.0531628
ZNF300P1	3.08455	-4.70876	2.03126	-2.31814	0.0204415	0.0542065
NKX2-1	16.6517	-4.64801	1.18901	-3.90915	9.26221e-05	0.000445951
GDPD2	102.218	-4.56893	0.473466	-9.64997	4.917e-22	1.28208e-20
PMFBP1	7.82004	-4.56785	1.655	-2.76003	0.00577956	0.0182996
USH1G	50.0722	-4.54543	1.58636	-2.86532	0.00416585	0.0137572
DGCR9	7.62554	-4.53033	1.66069	-2.72798	0.00637228	0.0198452
S100A12	2.70929	-4.52096	2.10274	-2.15003	0.0315526	0.0785772
STRC	2.70379	-4.51838	2.09432	-2.15744	0.0309711	0.0773246
VCAN	2.70379	-4.51838	2.09432	-2.15744	0.0309711	0.0773246
MYL7	2.70104	-4.51709	2.09692	-2.15416	0.0312278	0.0778984
EDN2	365.8	-4.51706	0.25432	-17.7614	1.40779e-70	1.788e-68
ICAM2	2.69829	-4.51579	2.10416	-2.14613	0.0318626	0.0792516
ZNF812	2.69279	-4.51317	2.13635	-2.11256	0.0346383	0.0849982
MCOLN2	30.3101	-4.48967	0.850779	-5.27714	1.31219e-07	9.96898e-07
SERPINB10	44.7886	-4.48338	0.69655	-6.43655	1.2222e-10	1.34136e-09
CCND2	565.019	-4.4783	0.207617	-21.57	3.43605e-103	7.95799e-101
S100A8	65.6131	-4.46803	2.02703	-2.20422	0.0275091	0.0698775
NSG1	65.817	-4.45597	0.571241	-7.8005	6.16608e-15	1.02006e-13
GYLTL1B	28.8649	-4.44889	0.863158	-5.1542	2.54716e-07	1.85376e-06
GAST	7.02828	-4.40952	1.697	-2.59842	0.00936544	0.0277666
CACNA1B	6.92234	-4.34421	1.68089	-2.58447	0.009753	0.0287748
AK7	6.91959	-4.34361	1.68212	-2.58222	0.00981673	0.0289412
TSPAN7	134.745	-4.34307	0.394597	-11.0063	3.56208e-28	1.26921e-26
IL1B	708.071	-4.32095	0.181749	-23.7742	6.17307e-125	2.20954e-122
KRT16P2	6.47776	-4.28617	1.70943	-2.50737	0.0121633	0.034791
UNC80	13.0083	-4.27462	1.22299	-3.49524	0.000473641	0.00197809
OR52K2	6.52234	-4.25209	1.71255	-2.4829	0.0130317	0.0368865
SERPINB3	625.036	-4.23542	0.188247	-22.4993	4.21634e-112	1.16497e-109
APLN	63.6073	-4.23229	0.559291	-7.56725	3.812e-14	5.87428e-13
MMP13	285.53	-4.23115	0.272586	-15.5223	2.45241e-54	2.07651e-52
MFNG	55.9051	-4.21726	0.586354	-7.19233	6.36927e-13	8.83008e-12
FEZ1	136.959	-4.20397	0.3784	-11.1098	1.12349e-28	4.10529e-27
CXCL11	49.4334	-4.19635	0.63544	-6.60386	4.00596e-11	4.67332e-10
HAS3	330.451	-4.13403	0.256698	-16.1046	2.36644e-58	2.30055e-56
KRT13	1557.29	-4.12511	0.297935	-13.8457	1.35099e-43	8.68437e-42
PTHLH	1584.01	-4.10915	0.130641	-31.4538	3.72644e-217	4.51444e-214
TPRG1	83.863	-4.06999	0.471326	-8.6352	5.86266e-18	1.18677e-16
GALNT9	67.6777	-4.06399	0.519254	-7.82659	5.01263e-15	8.33621e-14
LINC00163	16.7631	-4.05641	1.02664	-3.95115	7.7776e-05	0.000379342
IL36G	33.3982	-4.0369	0.727828	-5.5465	2.91446e-08	2.40439e-07
CNTN1	282.126	-4.03134	0.25935	-15.544	1.74627e-54	1.49468e-52
S100A9	603.217	-3.98976	0.183638	-21.7262	1.15946e-104	2.72542e-102
BDKRB2	379.728	-3.9508	0.231039	-17.1001	1.48032e-65	1.68938e-63
MORN5	10.0936	-3.88629	1.28054	-3.03489	0.00240627	0.00846467
SCD	2378.64	-3.87737	0.108302	-35.8015	1.04827e-280	2.75153e-277
CRYAB	9.65999	-3.865	1.30598	-2.95946	0.00308178	0.010558
CASP14	73.2372	-3.84478	0.505213	-7.6102	2.73666e-14	4.26308e-13
RAB38	678.07	-3.83392	0.17023	-22.522	2.52778e-112	7.10892e-110
IGFL1	56.0143	-3.76508	0.532268	-7.07365	1.50908e-12	2.01411e-11
HS3ST1	325.807	-3.6984	0.233166	-15.8616	1.16788e-56	1.05707e-54
GPR144	30.9674	-3.68904	0.707385	-5.21504	1.8378e-07	1.36397e-06
LRRC14B	22.1184	-3.67149	0.828206	-4.43306	9.29045e-06	5.37726e-05
SLC7A4	9.02885	-3.66174	1.30735	-2.80088	0.00509635	0.0163734
FOLR3	118.32	-3.62977	0.364736	-9.95178	2.47709e-23	7.0039e-22
LCP1	106.806	-3.56534	0.380108	-9.37981	6.60906e-21	1.61124e-19
NKD2	125.118	-3.55452	0.348985	-10.1853	2.30638e-24	6.85344e-23
CLCA2	2499.16	-3.4979	0.101588	-34.4323	8.29143e-260	1.63227e-256
GNB1L	73.5751	-3.49547	0.458863	-7.61769	2.58256e-14	4.039e-13
SLC4A11	89.5418	-3.47849	0.401904	-8.65504	4.92738e-18	1.00131e-16
SCN4B	162.647	-3.47823	0.301935	-11.5198	1.04874e-30	4.22419e-29
MIR30A	427.94	-3.44679	0.200344	-17.2044	2.46267e-66	2.89437e-64
SH3PXD2A	823.362	-3.43558	0.159963	-21.4774	2.53375e-102	5.62029e-100
DUSP7	948.325	-3.37672	0.141017	-23.9456	1.02775e-126	3.76418e-124
EDN1	726.723	-3.36045	0.157032	-21.3998	1.34313e-101	2.9379e-99
NIPAL4	75.0855	-3.35506	0.432083	-7.76485	8.17406e-15	1.33958e-13
THBD	5879.69	-3.32377	0.100982	-32.9145	1.36422e-237	2.14851e-234
KRT16P3	6.7452	-3.31701	1.40966	-2.35306	0.0186195	0.0500749
FOSB	142.727	-3.30519	0.3131	-10.5563	4.74769e-26	1.54486e-24
GALNT13	6.82276	-3.2719	1.37429	-2.38079	0.0172756	0.0470308
ODF3L1	6.82001	-3.27133	1.37592	-2.37756	0.0174276	0.0473872
MT1G	6.81726	-3.27074	1.37865	-2.37242	0.0176719	0.047911
PCSK9	282.706	-3.26801	0.228813	-14.2825	2.81476e-46	1.98788e-44
AQP3	500.308	-3.26491	0.175173	-18.6382	1.5739e-77	2.40653e-75
IL1A	1397.22	-3.26427	0.12489	-26.1372	1.37941e-150	6.78883e-148
PRG1	6.90307	-3.22616	1.38509	-2.32921	0.0198478	0.0528727
FLJ35946	6.62826	-3.22569	1.38363	-2.33132	0.0197362	0.05262
EDNRA	10.0743	-3.22568	1.13036	-2.85368	0.00432157	0.0142029
ENTPD8	26.0217	-3.2126	0.723112	-4.44273	8.88231e-06	5.16e-05
CES1	9.61598	-3.19365	1.14555	-2.78788	0.00530542	0.0169586
MMP12	6.43925	-3.17915	1.39137	-2.28491	0.0223181	0.0585033
APCDD1	12.4312	-3.15549	1.00741	-3.13229	0.00173449	0.00633793
CYP4F11	917.003	-3.15478	0.140251	-22.4939	4.76477e-112	1.2938e-109
FGFBP1	5835.87	-3.13578	0.087036	-36.0285	2.99341e-284	1.17858e-280
PAMR1	9.50728	-3.13145	1.14512	-2.73461	0.00624548	0.0195259
CYP4F35P	6.23101	-3.12652	1.4209	-2.20038	0.0277801	0.0704679
KRT6C	12.462	-3.12622	1.02148	-3.06047	0.00220993	0.00785647
IL20	54.942	-3.12424	0.484889	-6.44321	1.16975e-10	1.28828e-09
WDR66	1588.12	-3.11175	0.117062	-26.582	1.09505e-155	5.74867e-153
TGM1	312.933	-3.10481	0.209942	-14.7889	1.72671e-49	1.33304e-47
FSCN2	9.30453	-3.09661	1.14987	-2.69302	0.00708086	0.0217635
NLRP3	142.777	-3.0831	0.306004	-10.0753	7.10121e-24	2.0749e-22
AKR1C2	286.29	-3.08214	0.224497	-13.7291	6.79929e-43	4.31782e-41
MMP7	121.932	-3.06695	0.33035	-9.28394	1.6332e-20	3.86786e-19
CSTA	767.527	-3.03906	0.145284	-20.918	3.67053e-97	7.50743e-95
SERPINB13	1554.04	-3.0295	0.112249	-26.9892	1.98052e-160	1.11397e-157
PDZD4	6.11956	-3.02657	1.42571	-2.12285	0.0337665	0.083066
PDIA2	5.853	-3.02513	1.42596	-2.12147	0.0338827	0.0833132
HSPB3	8.3824	-3.02437	1.21611	-2.48693	0.0128852	0.0365439
BDKRB1	157.809	-3.01908	0.290176	-10.4043	2.36908e-25	7.46213e-24
KLK9	121.078	-3.01409	0.323963	-9.30383	1.35481e-20	3.23777e-19
BCL11B	149.652	-3.01215	0.310699	-9.69474	3.17431e-22	8.37391e-21
APCDD1L	180.082	-3.01195	0.267603	-11.2553	2.18139e-29	8.25835e-28
GRHL3	11.5142	-2.99813	1.01833	-2.94418	0.00323811	0.0110169
PDPN	1223.13	-2.99106	0.123162	-24.2856	2.78126e-130	1.15269e-127
MRVI1	31.0274	-2.98504	0.627296	-4.75858	1.94958e-06	1.23856e-05
CYP2E1	5.66125	-2.97086	1.4357	-2.06927	0.0385211	0.0931044
GPX2	651.866	-2.94474	0.151543	-19.4317	4.16528e-84	7.20868e-82
FXYD3	1849.15	-2.94385	0.112709	-26.1191	2.21253e-150	1.05591e-147
TNFRSF25	94.6095	-2.93755	0.363836	-8.07384	6.81205e-16	1.22051e-14
SERPINB4	56.77	-2.93125	0.496501	-5.90382	3.55189e-09	3.30022e-08
ANGPTL4	22.0972	-2.93036	0.728233	-4.02393	5.72343e-05	0.000287065
TP63	3601.07	-2.93012	0.0917937	-31.9207	1.37703e-223	1.80723e-220
LOC100652768	21.845	-2.91144	0.760161	-3.83003	0.000128127	0.00060163
NDRG1	6143.65	-2.88115	0.0814125	-35.3895	2.47677e-274	5.57238e-271
KCTD19	8.15401	-2.87914	1.18728	-2.42499	0.015309	0.0423952
CXorf58	8.15126	-2.87872	1.18634	-2.42656	0.0152426	0.0422335
OLR1	623.014	-2.87779	0.158355	-18.173	8.44104e-74	1.12659e-71
WDR65	142.756	-2.86076	0.294488	-9.71435	2.61904e-22	6.9557e-21
GLDC	10.8303	-2.85955	1.03599	-2.76021	0.00577645	0.0182971
SERPINF2	11.0969	-2.85745	1.05726	-2.7027	0.00687786	0.0212017
AREG	20.8581	-2.85483	0.739217	-3.86196	0.000112479	0.000533403
SHROOM2	23.2651	-2.84737	0.700908	-4.0624	4.85704e-05	0.000246992
MTUS2	15.3886	-2.83435	0.858067	-3.30318	0.000955964	0.00371783
GBP6	362.012	-2.81723	0.191808	-14.6878	7.72282e-49	5.81946e-47
ST6GALNAC1	14.6748	-2.81617	0.917306	-3.07004	0.0021403	0.00763826
DLL1	893.082	-2.78779	0.132748	-21.0006	6.47994e-98	1.3607e-95
KRT6A	9083.31	-2.78027	0.08961	-31.0264	2.37699e-211	2.67394e-208
KRT6B	19.9186	-2.77928	0.760878	-3.65272	0.000259475	0.00113861
PLEKHG5	442.052	-2.77594	0.186296	-14.9007	3.26006e-50	2.58003e-48
PSAPL1	45.4982	-2.77483	0.504519	-5.49996	3.79878e-08	3.08228e-07
IFFO2	8364.52	-2.77376	0.077315	-35.8761	7.20455e-282	2.26929e-278
KRT31	68.9733	-2.76513	0.40971	-6.74899	1.48882e-11	1.81201e-10
DKKL1	7.55951	-2.75283	1.21699	-2.262	0.0236973	0.0615552
SOCS1	42.483	-2.75072	0.518278	-5.30742	1.11186e-07	8.51684e-07
PTP4A3	34.6239	-2.74813	0.570335	-4.81845	1.44681e-06	9.36918e-06
PLCH2	435.962	-2.73119	0.172528	-15.8304	1.9189e-56	1.7269e-54
GYG2P1	9.79121	-2.731	1.05541	-2.58762	0.00966412	0.0285554
FAM182A	78.105	-2.72598	0.381024	-7.15436	8.40637e-13	1.14629e-11
CYP26B1	924.134	-2.72575	0.130438	-20.8969	5.70907e-97	1.15272e-94
CCDC3	1313.94	-2.72332	0.117689	-23.14	1.83493e-118	5.77965e-116
PRODH	45.6022	-2.71125	0.492972	-5.49979	3.80235e-08	3.08359e-07
FAM182B	54.6658	-2.70747	0.453572	-5.96922	2.38391e-09	2.26717e-08
TNNT3	21.3531	-2.70655	0.721212	-3.75279	0.00017488	0.000796696
SPRR1B	9.58847	-2.69631	1.06273	-2.53715	0.0111758	0.0322892
ECM1	295.002	-2.69279	0.203278	-13.2469	4.70385e-40	2.73361e-38
CLYBL	20.6144	-2.68909	0.750122	-3.58487	0.000337247	0.00144407
WNT4	91.7999	-2.6853	0.351883	-7.63124	2.32509e-14	3.66546e-13
SAMD5	188.414	-2.6726	0.248766	-10.7434	6.36437e-27	2.14631e-25
KRT14	23951.4	-2.67041	0.0802444	-33.2785	7.91386e-243	1.38484e-239
SDK2	23.5206	-2.66408	0.681598	-3.90858	9.28384e-05	0.000446719
IL17REL	8.86634	-2.65507	1.13011	-2.34939	0.0188042	0.0505372
SNCA	184.195	-2.65076	0.253934	-10.4388	1.64902e-25	5.23598e-24
EFNB1	1102.65	-2.64697	0.120543	-21.9587	7.15491e-107	1.70731e-104
RASL11B	217.203	-2.62853	0.234132	-11.2267	3.01531e-29	1.13608e-27
TNFSF10	356.98	-2.62395	0.211987	-12.3779	3.44406e-35	1.64365e-33
QPRT	58.0364	-2.62393	0.445555	-5.88912	3.88252e-09	3.57996e-08
KRT33B	8.9274	-2.62056	1.10625	-2.36887	0.0178428	0.0482662
SFN	8614.1	-2.61726	0.0866276	-30.2128	1.60918e-200	1.58394e-197
GRAP	6.73418	-2.61419	1.25496	-2.0831	0.0372426	0.0904725
CCL20	6.72044	-2.61119	1.25172	-2.08608	0.0369715	0.089925
PADI3	191.607	-2.61068	0.247814	-10.5349	5.9672e-26	1.93369e-24
C12orf54	108.54	-2.60894	0.319382	-8.16873	3.11655e-16	5.70064e-15
AKR1B10	56.4059	-2.60486	0.439949	-5.92082	3.20348e-09	2.99238e-08
ACPP	29.3324	-2.58771	0.603924	-4.28483	1.82879e-05	0.000100494
FADS3	1507.18	-2.58658	0.112318	-23.0291	2.38326e-117	7.21806e-115
MICALCL	106.682	-2.57981	0.32615	-7.9099	2.57591e-15	4.40477e-14
HMSD	19.5305	-2.57855	0.744624	-3.4629	0.000534394	0.00220492
TMPRSS4	733.69	-2.57208	0.140721	-18.2779	1.24076e-74	1.7141e-72
DFNA5	741.696	-2.56941	0.141264	-18.1887	6.34146e-74	8.60962e-72
BCAM	1592.51	-2.56375	0.111766	-22.9385	1.91747e-116	5.69779e-114
CLDN1	6604.42	-2.54049	0.0853255	-29.774	8.47105e-195	7.84768e-192
PGAM2	43.3512	-2.52629	0.494264	-5.11121	3.20097e-07	2.29459e-06
RNF128	19.5632	-2.52098	0.734676	-3.43142	0.000600435	0.00244221
VWA2	223.433	-2.51015	0.227354	-11.0407	2.43165e-28	8.80371e-27
CALML3	638.439	-2.50252	0.151627	-16.5044	3.40886e-61	3.53198e-59
HSPA6	31.2126	-2.50129	0.591595	-4.22805	2.35728e-05	0.000126749
MPZL2	1702.34	-2.49903	0.111876	-22.3375	1.59752e-110	4.12449e-108
HOXD11	29.7998	-2.4956	0.593181	-4.20715	2.58611e-05	0.000138157
TGFA	4600.85	-2.48907	0.090469	-27.5129	1.23002e-166	8.07149e-164
S100A2	8391.9	-2.47985	0.0891628	-27.8126	3.0549e-170	2.09181e-167
HHIPL2	33.1994	-2.4753	0.560703	-4.41464	1.0118e-05	5.8199e-05
C1orf21	179.552	-2.45449	0.251591	-9.75587	1.74104e-22	4.67114e-21
KLRG2	8.75733	-2.44559	1.14963	-2.12729	0.0333957	0.0823984
AKR1B15	8.25169	-2.4418	1.10913	-2.20156	0.0276966	0.0703199
LINC00460	16.4759	-2.43932	0.787402	-3.09793	0.00194876	0.0070376
STARD5	152.825	-2.43224	0.268445	-9.0605	1.29855e-19	2.90908e-18
MMP25	14.4387	-2.42831	0.854587	-2.8415	0.00449021	0.0146714
RHOB	1827.61	-2.41578	0.104466	-23.125	2.59395e-118	8.01022e-116
SLC13A3	22.2211	-2.4148	0.684045	-3.53017	0.000415289	0.00175346
GAS2L2	9.80309	-2.41273	1.02224	-2.36024	0.0182633	0.0492767
CLCN1	11.9041	-2.40668	0.918855	-2.61922	0.00881318	0.0263525
RHBDL1	50.0786	-2.39517	0.464401	-5.15754	2.50211e-07	1.82265e-06
KRT34	49.8429	-2.38664	0.491474	-4.85609	1.19728e-06	7.87308e-06
GPR68	74.5757	-2.37656	0.374784	-6.34113	2.28088e-10	2.42059e-09
KREMEN1	388.241	-2.37129	0.175128	-13.5403	9.04058e-42	5.56172e-40
CXCR7	718.366	-2.37058	0.136113	-17.4163	6.21062e-68	7.52392e-66
ESPN	39.7305	-2.36724	0.508897	-4.6517	3.29206e-06	2.03081e-05
C9	11.7982	-2.35914	0.923106	-2.55566	0.0105987	0.0309051
TMEM255B	15.7254	-2.35864	0.798851	-2.95254	0.00315167	0.010774
PPP4R4	203.557	-2.35526	0.237303	-9.92512	3.23724e-23	9.07177e-22
AKR1C1	565.708	-2.35002	0.177634	-13.2296	5.91911e-40	3.41465e-38
DPP6	13.3578	-2.34957	0.866141	-2.71268	0.00667413	0.0206423
ASB2	38.1895	-2.34939	0.527789	-4.45138	8.53221e-06	4.97158e-05
IL6R	355.306	-2.34753	0.181768	-12.915	3.70479e-38	2.00504e-36
RASSF10	321.288	-2.34525	0.191984	-12.2159	2.55652e-34	1.15697e-32
ADRB2	1155.28	-2.34502	0.123592	-18.9739	2.80169e-80	4.50243e-78
FAM212A	40.3488	-2.34343	0.511847	-4.57837	4.68605e-06	2.82005e-05
PLTP	350.091	-2.33931	0.183415	-12.7542	2.95483e-37	1.55637e-35
TNFAIP3	1844.63	-2.33107	0.122201	-19.0757	4.02123e-81	6.5289e-79
GPM6A	10.011	-2.331	1.02698	-2.26976	0.0232221	0.0604424
ADM5	9.76645	-2.32841	1.00841	-2.30899	0.0209441	0.0553424
KLK11	45.9041	-2.31964	0.467248	-4.96448	6.88852e-07	4.70049e-06
TNS4	773.926	-2.31274	0.153953	-15.0224	5.24104e-51	4.21128e-49
SSTR5	53.7637	-2.30326	0.441462	-5.21734	1.81515e-07	1.34971e-06
GLDN	32.3902	-2.29835	0.560544	-4.10021	4.12767e-05	0.000212301
FLJ46906	19.3967	-2.2953	0.728778	-3.14952	0.00163539	0.00601631
IFITM1	654.756	-2.29319	0.145583	-15.7518	6.67276e-56	5.90389e-54
LSP1	258.689	-2.27918	0.206358	-11.0448	2.32281e-28	8.429e-27
TRPM4	175.121	-2.27843	0.245309	-9.28798	1.57241e-20	3.7295e-19
IL1RAP	2652.77	-2.2783	0.09151	-24.8967	8.07332e-137	3.73961e-134
TENM2	763.371	-2.27768	0.149215	-15.2644	1.32118e-52	1.08371e-50
FDCSP	35.4344	-2.27272	0.529274	-4.29403	1.75456e-05	9.68882e-05
CERS3	85.891	-2.26918	0.345443	-6.56888	5.06946e-11	5.85329e-10
EPGN	303.773	-2.26915	0.191422	-11.8542	2.04791e-32	8.81217e-31
RAET1G	24.8304	-2.26894	0.649868	-3.49138	0.000480528	0.00200472
SLC20A2	856.164	-2.25551	0.131745	-17.1203	1.04654e-65	1.2119e-63
CYB5R1	928.593	-2.25539	0.128208	-17.5917	2.85264e-69	3.5375e-67
LGALS7	27.2221	-2.25483	0.615269	-3.66479	0.00024754	0.00109049
XDH	496.836	-2.25084	0.158796	-14.1745	1.31826e-45	9.14594e-44
KLHL30	79.7781	-2.24671	0.36056	-6.23115	4.63019e-10	4.76607e-09
AK8	9.10813	-2.24652	1.02665	-2.1882	0.0286547	0.0723327
ST6GALNAC2	588.806	-2.23781	0.14667	-15.2575	1.46848e-52	1.1983e-50
BAIAP3	14.2005	-2.23384	0.841463	-2.65471	0.00793778	0.0240454
RCSD1	21.4879	-2.23068	0.675018	-3.30462	0.000951041	0.003701
CD274	303.315	-2.22851	0.202417	-11.0095	3.44046e-28	1.23145e-26
LAPTM5	67.7214	-2.22485	0.396188	-5.61563	1.95848e-08	1.64589e-07
FGFR3	467.08	-2.21179	0.159492	-13.8677	9.93616e-44	6.4663e-42
MIR612	28.4606	-2.21155	0.64329	-3.43787	0.000586316	0.00239592
RIMS3	22.9526	-2.21154	0.655606	-3.37328	0.000742778	0.00296227
VIPR1	72.6214	-2.21063	0.374934	-5.89604	3.72328e-09	3.44726e-08
RASGEF1A	49.503	-2.20902	0.461345	-4.78821	1.68276e-06	1.07824e-05
CASP1	126.133	-2.20447	0.288959	-7.629	2.36573e-14	3.72579e-13
ABCG1	296.387	-2.19761	0.19368	-11.3466	7.70792e-30	2.98261e-28
ZNF219	281.326	-2.19213	0.199104	-11.01	3.42164e-28	1.23031e-26
FAM83C	804.893	-2.19189	0.133038	-16.4757	5.48759e-61	5.57575e-59
CYP27B1	142.734	-2.19175	0.270317	-8.10805	5.14371e-16	9.27929e-15
KBTBD8	115.296	-2.19058	0.299535	-7.31328	2.60704e-13	3.75647e-12
GALNT18	159.33	-2.18987	0.254296	-8.61152	7.21012e-18	1.45207e-16
LOC100130476	59.1085	-2.18908	0.420717	-5.2032	1.95883e-07	1.4463e-06
SLC9A2	13.806	-2.18596	0.861268	-2.53808	0.0111463	0.0322217
ADAMTSL4	95.4247	-2.17598	0.328173	-6.6306	3.34318e-11	3.93217e-10
RNF152	91.9725	-2.17571	0.336729	-6.4613	1.03808e-10	1.14889e-09
ERG	87.995	-2.17417	0.359072	-6.05496	1.40451e-09	1.36964e-08
FLRT3	99.6771	-2.16382	0.335409	-6.45127	1.10917e-10	1.22499e-09
HGFAC	10.1035	-2.16002	0.986258	-2.19012	0.0285155	0.0720619
ZNF425	14.2304	-2.15788	0.827607	-2.60738	0.00912392	0.0271426
MAOA	797.158	-2.15472	0.133278	-16.1671	8.60608e-59	8.47108e-57
RAET1E	49.3396	-2.15181	0.450295	-4.77866	1.76465e-06	1.1279e-05
ALDH3A1	3796.81	-2.1486	0.10305	-20.85	1.52343e-96	3.03703e-94
S100A14	1217.61	-2.14789	0.125676	-17.0907	1.7408e-65	1.97236e-63
HEPHL1	1041.77	-2.14666	0.121119	-17.7236	2.75679e-70	3.44577e-68
MYC	1529.09	-2.14359	0.10435	-20.5423	9.01873e-94	1.73215e-91
PKP1	981.16	-2.13868	0.134515	-15.8992	6.41625e-57	5.87497e-55
IL1RN	113.542	-2.1279	0.2968	-7.1695	7.52735e-13	1.03355e-11
ATP6V1C2	20.6733	-2.12751	0.677168	-3.14177	0.0016793	0.00616199
NR4A3	22.9212	-2.12612	0.663307	-3.20534	0.00134905	0.00506464
GJB4	26.6835	-2.1257	0.612022	-3.47325	0.000514202	0.00212774
KRT42P	48.6001	-2.12448	0.4549	-4.67022	3.00874e-06	1.8648e-05
HBEGF	266.659	-2.12018	0.21104	-10.0464	9.53057e-24	2.75914e-22
BATF3	9.95358	-2.09787	0.995403	-2.10756	0.0350695	0.0859625
KIF17	118.425	-2.09681	0.294868	-7.11101	1.15198e-12	1.54932e-11
SLC1A4	1372.05	-2.09544	0.107577	-19.4784	1.67348e-84	2.9284e-82
MARS2	275.322	-2.09484	0.202181	-10.3612	3.72164e-25	1.15834e-23
ANO9	25.8814	-2.09288	0.620728	-3.37166	0.000747161	0.00297749
MIR17HG	437.932	-2.0897	0.161419	-12.9459	2.47976e-38	1.36076e-36
FGF1	21.3801	-2.08767	0.672151	-3.10595	0.00189671	0.00687011
SLC35F3	423.89	-2.08336	0.173116	-12.0345	2.34183e-33	1.03021e-31
HLA-DOB	20.3398	-2.08004	0.691925	-3.00616	0.00264567	0.00920606
SOWAHC	2616.69	-2.07791	0.0933141	-22.2679	7.56401e-110	1.86134e-107
WNT7A	307.448	-2.07517	0.195998	-10.5877	3.39768e-26	1.11712e-24
HES2	69.7701	-2.07297	0.373703	-5.54712	2.90411e-08	2.39711e-07
HAP1	96.1192	-2.06956	0.318436	-6.49913	8.07857e-11	9.07485e-10
RIN1	441.103	-2.0625	0.171931	-11.9961	3.72573e-33	1.6299e-31
PTPRZ1	12.8665	-2.06072	0.857661	-2.40272	0.0162736	0.044658
ACPT	19.9008	-2.05944	0.685066	-3.00619	0.00264547	0.00920606
TMEM52B	35.6691	-2.04936	0.51642	-3.9684	7.23567e-05	0.000355663
DUSP8	21.421	-2.03925	0.661405	-3.08321	0.0020478	0.00735481
TNC	2509.7	-2.03401	0.0909063	-22.3748	6.93232e-111	1.85046e-108
CLDN16	110.568	-2.03375	0.308686	-6.58843	4.44493e-11	5.15487e-10
SOAT2	13.0161	-2.02493	0.842631	-2.40311	0.0162564	0.0446264
ABLIM1	1511.46	-2.02078	0.109804	-18.4036	1.23015e-75	1.79386e-73
PTGS1	3657.59	-2.0182	0.085491	-23.6072	3.2525e-123	1.11356e-120
SORL1	4165.66	-2.0175	0.0974459	-20.7038	3.19853e-95	6.21897e-93
KREMEN2	31.9837	-2.01664	0.541118	-3.72679	0.000193931	0.000873131
CLEC2B	988.785	-2.00768	0.12953	-15.4997	3.48253e-54	2.93296e-52
PPM1J	14.7892	-2.00514	0.802178	-2.49962	0.0124326	0.0354392
CXCL2	90.9721	-2.00412	0.325571	-6.1557	7.47472e-10	7.49805e-09
ADAM8	309.554	-2.00272	0.185239	-10.8116	3.03487e-27	1.04359e-25
CT62	14.5336	-1.99881	0.798632	-2.5028	0.0123217	0.0351674
LDHD	52.8707	-1.99498	0.464016	-4.29937	1.71281e-05	9.47158e-05
CYP1A1	360.69	-1.99364	0.188459	-10.5786	3.74344e-26	1.22824e-24
PALMD	240.863	-1.99072	0.212363	-9.37415	6.97348e-21	1.69484e-19
MAFB	131.98	-1.98875	0.293281	-6.78106	1.19295e-11	1.46322e-10
ADAM11	12.533	-1.98587	0.868035	-2.28778	0.0221502	0.0581407
ARL4D	447.42	-1.985	0.160415	-12.3741	3.60807e-35	1.71672e-33
DUSP9	493.096	-1.98237	0.152503	-12.9989	1.24075e-38	6.92927e-37
NUAK2	140.056	-1.98155	0.264379	-7.4951	6.62498e-14	1.00324e-12
CDKL5	111.16	-1.98044	0.304315	-6.50785	7.62361e-11	8.61293e-10
FOLR1	28.3814	-1.96821	0.576352	-3.41494	0.00063797	0.0025842
PLAC1	65.4156	-1.96797	0.379758	-5.18217	2.19318e-07	1.61178e-06
SERPINB1	375.914	-1.96678	0.171101	-11.4949	1.39988e-30	5.58143e-29
ALDH4A1	538.812	-1.96661	0.148627	-13.2319	5.74259e-40	3.325e-38
TACSTD2	11999.6	-1.96202	0.0910851	-21.5405	6.5019e-103	1.48404e-100
PPP1R14C	357.042	-1.96141	0.173761	-11.2879	1.50541e-29	5.72673e-28
PPP2R2C	757.484	-1.95819	0.139919	-13.9951	1.66953e-44	1.10943e-42
LRG1	81.1999	-1.95484	0.342043	-5.71519	1.0958e-08	9.54518e-08
FAM25A	41.257	-1.94206	0.483012	-4.02073	5.80175e-05	0.00029053
SPRY4	22.5617	-1.93819	0.649773	-2.98287	0.00285561	0.00986465
RGS16	14.4695	-1.93726	0.827508	-2.34108	0.0192281	0.0515445
OLFM1	116.023	-1.93646	0.303758	-6.37502	1.82941e-10	1.96933e-09
LFNG	882.539	-1.93574	0.124393	-15.5615	1.32899e-54	1.15002e-52
IFLTD1	31.8869	-1.92757	0.537581	-3.58565	0.000336246	0.00144018
B4GALNT2	21.1718	-1.92575	0.657169	-2.93038	0.00338546	0.0114637
AKR1C3	529.134	-1.92212	0.164401	-11.6917	1.40551e-31	5.85592e-30
CRYL1	34.8471	-1.92116	0.514418	-3.73462	0.000187997	0.000849332
BCO2	159.995	-1.91577	0.249907	-7.66594	1.77524e-14	2.82407e-13
RCBTB2	125.028	-1.90941	0.280975	-6.79564	1.07834e-11	1.32782e-10
HLA-DQB1	39.0253	-1.9065	0.502651	-3.7929	0.000148898	0.000690718
NR4A1	86.3404	-1.90528	0.334115	-5.70246	1.18092e-08	1.02188e-07
GBP1	569.441	-1.90484	0.150989	-12.6158	1.72855e-36	8.72529e-35
KRT17	31405.7	-1.90312	0.0851112	-22.3604	9.55769e-111	2.50873e-108
LRRC8B	181.473	-1.90183	0.235733	-8.06772	7.16206e-16	1.28031e-14
MFSD2A	279.628	-1.88473	0.200609	-9.39502	5.72081e-21	1.40557e-19
IL17RE	19.6787	-1.88452	0.679257	-2.77439	0.00553059	0.0175926
PALM2	98.4337	-1.88448	0.314831	-5.98567	2.15496e-09	2.06313e-08
FGFR4	18.236	-1.88091	0.708247	-2.65572	0.00791396	0.0239871
ANKRD29	27.0529	-1.88042	0.579108	-3.2471	0.00116589	0.00443624
IL16	39.4598	-1.87894	0.494004	-3.80348	0.000142675	0.0006642
GBP2	170.945	-1.87389	0.24789	-7.55938	4.05008e-14	6.22289e-13
RAPGEF3	453.404	-1.87058	0.156339	-11.9649	5.42697e-33	2.36103e-31
FAM213A	328.024	-1.86683	0.182963	-10.2033	1.91568e-24	5.70322e-23
MICAL2	1036.46	-1.86552	0.116188	-16.0561	5.18385e-58	4.9479e-56
LOC541473	68.489	-1.86322	0.374957	-4.96916	6.72442e-07	4.59648e-06
BACH2	100.68	-1.85552	0.327437	-5.66679	1.45494e-08	1.24127e-07
PRDM13	43.8782	-1.84668	0.461996	-3.99717	6.41045e-05	0.000318324
DUOX2	50.289	-1.84279	0.438525	-4.20224	2.64287e-05	0.000141045
CYP2S1	106.217	-1.84264	0.310218	-5.93984	2.85305e-09	2.68736e-08
IL11	412.798	-1.83886	0.186094	-9.88134	5.01556e-23	1.38823e-21
ARMC5	166.807	-1.83312	0.242494	-7.55946	4.0475e-14	6.22289e-13
PLAUR	427.819	-1.82628	0.170215	-10.7293	7.41755e-27	2.49613e-25
JUN	1414.28	-1.82541	0.121295	-15.0493	3.48919e-51	2.81801e-49
ETS2	6725.78	-1.82472	0.0818117	-22.3039	3.38336e-110	8.45788e-108
TMEM40	548.745	-1.80942	0.146347	-12.3639	4.09763e-35	1.94378e-33
LAX1	12.911	-1.80787	0.825987	-2.18873	0.0286162	0.0722585
FABP5	748.493	-1.80592	0.134165	-13.4604	2.67356e-41	1.60099e-39
ANXA10	137.034	-1.80517	0.265032	-6.81114	9.68316e-12	1.19984e-10
HMGCS1	5900.99	-1.80439	0.093201	-19.3602	1.67368e-83	2.86509e-81
GJB3	1721.81	-1.80133	0.101603	-17.729	2.5053e-70	3.15647e-68
ASS1	2265.5	-1.80011	0.0993725	-18.1148	2.43643e-73	3.22448e-71
ZNF485	58.1165	-1.79827	0.405556	-4.43409	9.24599e-06	5.35547e-05
POU3F1	16.8556	-1.7967	0.728124	-2.46757	0.0136032	0.0382907
PDLIM5	2456.22	-1.7936	0.0930382	-19.2781	8.20902e-83	1.39015e-80
WNT3A	95.6987	-1.78837	0.314267	-5.69061	1.26584e-08	1.0882e-07
ZDHHC11	144.733	-1.78744	0.261197	-6.84324	7.74197e-12	9.69994e-11
SRPX	175.06	-1.78466	0.234691	-7.6043	2.86445e-14	4.44455e-13
SDR16C5	205.556	-1.78215	0.238391	-7.47575	7.67642e-14	1.1569e-12
PCYOX1L	28.1239	-1.78201	0.563402	-3.16295	0.00156179	0.00577928
TCEA3	32.7568	-1.77508	0.523884	-3.3883	0.000703275	0.00282188
PDZK1IP1	116.39	-1.77472	0.286214	-6.20068	5.6219e-10	5.70853e-09
RNF32	104.533	-1.76841	0.298728	-5.9198	3.22329e-09	3.00732e-08
ZFYVE28	28.3093	-1.76838	0.574559	-3.07781	0.0020853	0.00746903
LDLR	1380.2	-1.76809	0.107534	-16.4421	9.54928e-61	9.64048e-59
SLC2A9	386.204	-1.76733	0.168641	-10.4798	1.06916e-25	3.42936e-24
DAPP1	320.861	-1.76103	0.189051	-9.31512	1.21812e-20	2.91554e-19
TP53AIP1	153.38	-1.7584	0.253797	-6.92837	4.25708e-12	5.45522e-11
GLIPR1	755.497	-1.75754	0.138541	-12.6861	7.06585e-37	3.67261e-35
DOK7	349.436	-1.75512	0.186203	-9.42583	4.26721e-21	1.06e-19
PROCR	396.602	-1.75191	0.164756	-10.6334	2.08374e-26	6.89431e-25
PLEKHG4B	288.153	-1.74863	0.191108	-9.14999	5.69383e-20	1.31292e-18
ATP2C2	241.318	-1.74769	0.203748	-8.57769	9.67995e-18	1.93464e-16
CDC42EP2	107.42	-1.74758	0.300232	-5.82078	5.85743e-09	5.28792e-08
LOC100505839	20.5107	-1.74692	0.663025	-2.63478	0.00841925	0.0253576
IL12RB2	311.658	-1.74532	0.184316	-9.46916	2.82097e-21	7.04079e-20
INSIG1	924.221	-1.74252	0.124176	-14.0327	9.83631e-45	6.62018e-43
INO80C	211.425	-1.73717	0.216303	-8.03123	9.65024e-16	1.70383e-14
GGT1	71.5808	-1.73431	0.368258	-4.70949	2.48342e-06	1.55504e-05
KRT16	2477.96	-1.73333	0.0945078	-18.3406	3.92397e-75	5.61806e-73
CLMN	210.899	-1.73064	0.218338	-7.92641	2.2558e-15	3.87421e-14
PRNP	9993.28	-1.72512	0.0743439	-23.2045	4.09923e-119	1.31753e-116
TMEM154	282.244	-1.72367	0.190661	-9.04051	1.55937e-19	3.47854e-18
C19orf38	17.8617	-1.72313	0.700881	-2.45851	0.0139514	0.0390823
TLL2	25.9554	-1.72233	0.606232	-2.84104	0.00449664	0.0146894
ABLIM2	57.7253	-1.71593	0.406171	-4.22465	2.39308e-05	0.000128498
DUSP5	257.653	-1.71469	0.197158	-8.69701	3.40751e-18	6.96947e-17
DUSP2	149.561	-1.71402	0.26048	-6.58024	4.69682e-11	5.43898e-10
PTAFR	400.769	-1.7132	0.166268	-10.3038	6.77279e-25	2.0833e-23
SLC6A15	652.43	-1.71164	0.136241	-12.5633	3.35844e-36	1.68446e-34
NAV1	344.846	-1.71142	0.207244	-8.25797	1.48172e-16	2.77804e-15
BANK1	19.1929	-1.70897	0.674922	-2.5321	0.0113381	0.0326799
DYRK3	288.938	-1.70561	0.193608	-8.8096	1.25588e-18	2.63017e-17
SOX15	388.746	-1.70523	0.17253	-9.88367	4.90062e-23	1.3588e-21
SERPINB7	159.352	-1.70461	0.253762	-6.71737	1.85039e-11	2.22967e-10
COL7A1	2419.24	-1.70395	0.0937189	-18.1815	7.2275e-74	9.7287e-72
CYYR1	20.1993	-1.70084	0.663554	-2.56323	0.0103705	0.0303487
NELL2	39.4924	-1.69161	0.481606	-3.51243	0.000444034	0.00186433
SREBF2	678.408	-1.6892	0.132771	-12.7227	4.42572e-37	2.31563e-35
SLC22A23	135.671	-1.6889	0.272591	-6.19573	5.80161e-10	5.88343e-09
FAM84B	2908.16	-1.68207	0.111543	-15.0801	2.18903e-51	1.77706e-49
IRF6	3059.7	-1.68079	0.0860876	-19.5242	6.83497e-85	1.20948e-82
PPIF	1532.36	-1.67942	0.101483	-16.5488	1.63381e-61	1.72691e-59
MAT2A	3757.13	-1.6792	0.08924	-18.8167	5.51319e-79	8.59675e-77
LOC344887	143.549	-1.67863	0.256156	-6.55314	5.63382e-11	6.4717e-10
TUSC1	439.835	-1.67783	0.162278	-10.3392	4.68309e-25	1.45471e-23
MDFI	756.85	-1.67782	0.129544	-12.9517	2.29678e-38	1.26476e-36
PLLP	13.4753	-1.67592	0.807534	-2.07536	0.0379531	0.0918868
SCN2B	25.3115	-1.67555	0.595234	-2.81494	0.0048787	0.0157513
KRT5	35687.7	-1.67549	0.0848262	-19.7521	7.70064e-87	1.4102e-84
IL1R2	45.966	-1.6744	0.448892	-3.73007	0.000191425	0.000863082
KLHL31	33.5384	-1.67281	0.513528	-3.25749	0.00112402	0.00428727
TMPRSS11E	40.7802	-1.66909	0.468742	-3.56079	0.000369746	0.00157467
BCAR3	4254.73	-1.66526	0.100913	-16.502	3.54646e-61	3.65054e-59
C2CD4C	16.9505	-1.66492	0.720406	-2.31108	0.0208282	0.0550838
ARTN	457.71	-1.66428	0.159654	-10.4243	1.92132e-25	6.07607e-24
LHX6	365.335	-1.6619	0.168567	-9.85896	6.26952e-23	1.73226e-21
CLDN23	115.298	-1.66116	0.304264	-5.45959	4.7723e-08	3.81179e-07
CCDC11	30.831	-1.66042	0.534791	-3.10481	0.00190403	0.00689054
TRIM29	2812.47	-1.66009	0.0900636	-18.4325	7.21294e-76	1.06165e-73
FAT1	9754.18	-1.6591	0.0902827	-18.3767	2.01931e-75	2.91763e-73
HSD17B8	141.193	-1.65881	0.260367	-6.37108	1.87707e-10	2.01789e-09
LINC00263	36.2195	-1.65683	0.504996	-3.28088	0.00103484	0.00398186
SLC35G2	38.3895	-1.65618	0.481248	-3.44142	0.000578666	0.00237042
SLC9A3R1	687.458	-1.64968	0.132562	-12.4446	1.49662e-35	7.34279e-34
APCDD1L-AS1	43.6122	-1.6432	0.453138	-3.62627	0.000287543	0.00124993
NET1	2919.23	-1.63479	0.0996123	-16.4115	1.58256e-60	1.5875e-58
PORCN	991.695	-1.63378	0.115684	-14.1227	2.75123e-45	1.86763e-43
PROSER2	758.372	-1.63377	0.12948	-12.6179	1.68212e-36	8.51825e-35
KLF7	990.425	-1.63128	0.116715	-13.9765	2.16805e-44	1.43465e-42
LGALSL	376.893	-1.62987	0.17303	-9.41959	4.5286e-21	1.1214e-19
FJX1	241.714	-1.62945	0.202342	-8.05293	8.08349e-16	1.43687e-14
SLCO4A1	656.852	-1.62912	0.133318	-12.2198	2.43705e-34	1.10608e-32
EGLN3	649.952	-1.62455	0.136172	-11.9301	8.24375e-33	3.55701e-31
CD9	2289.5	-1.62319	0.0928261	-17.4863	1.8215e-68	2.24116e-66
GRB14	35.2931	-1.62313	0.508135	-3.19428	0.0014018	0.00523523
ALDH6A1	86.8701	-1.62102	0.339071	-4.78077	1.74625e-06	1.11704e-05
STK17A	3809.13	-1.62078	0.0884594	-18.3223	5.49644e-75	7.79851e-73
SERPINB8	392.98	-1.61969	0.164748	-9.83129	8.25571e-23	2.2612e-21
SLFN12L	15.3216	-1.61806	0.752296	-2.15082	0.0314902	0.0784466
ELOVL3	22.3634	-1.6166	0.660204	-2.44863	0.0143399	0.0400141
SQLE	1775.33	-1.61421	0.0979594	-16.4783	5.2519e-61	5.37092e-59
GAA	236.514	-1.60982	0.20394	-7.89359	2.93621e-15	4.98302e-14
CLU	1145.23	-1.60823	0.112562	-14.2875	2.61861e-46	1.86609e-44
SHC1	2752.6	-1.60093	0.0887875	-18.031	1.11282e-72	1.43654e-70
NUDT7	20.5443	-1.60062	0.645756	-2.47867	0.0131872	0.0372731
C14orf132	23.1347	-1.60042	0.614506	-2.60441	0.00920334	0.0273375
RAPGEFL1	134.416	-1.60022	0.280309	-5.70875	1.13807e-08	9.88063e-08
DAB2IP	945.56	-1.59878	0.128585	-12.4337	1.71546e-35	8.39031e-34
MYEF2	37.5556	-1.59529	0.493536	-3.23237	0.00122768	0.00464666
KLF13	987.302	-1.59309	0.119388	-13.3438	1.28706e-40	7.56337e-39
STARD4	286	-1.59252	0.200125	-7.95761	1.75391e-15	3.03542e-14
UPB1	60.2457	-1.58907	0.381719	-4.16292	3.14205e-05	0.000165049
IDI1	790.261	-1.58789	0.13	-12.2145	2.60095e-34	1.17371e-32
JPH2	833.968	-1.58664	0.129315	-12.2695	1.31997e-34	6.06072e-33
PNP	781.332	-1.58453	0.135839	-11.6648	1.92844e-31	7.9714e-30
PLCL1	29.4056	-1.5813	0.541244	-2.92161	0.00348232	0.0117361
TNS1	139.576	-1.57816	0.269016	-5.8664	4.45355e-09	4.08259e-08
JUND	521.954	-1.57724	0.171266	-9.20928	3.28333e-20	7.67198e-19
C1orf116	2290.93	-1.5747	0.093508	-16.8402	1.23725e-63	1.34383e-61
NCOR1P1	18.4909	-1.57042	0.691543	-2.27089	0.0231537	0.0603021
MARK1	179.621	-1.57008	0.24162	-6.49812	8.13321e-11	9.12971e-10
KRT15	1337.76	-1.56707	0.108489	-14.4445	2.71398e-47	1.99731e-45
LPXN	247.298	-1.56382	0.198204	-7.88995	3.02296e-15	5.12472e-14
DSC3	3879.7	-1.56327	0.0826992	-18.9031	1.07593e-79	1.7116e-77
LONRF1	111.873	-1.56276	0.283374	-5.51484	3.49106e-08	2.84432e-07
CARD10	1015.59	-1.56246	0.120248	-12.9937	1.32912e-38	7.39656e-37
SPHK1	700.965	-1.56183	0.1669	-9.35789	8.13486e-21	1.96497e-19
CERS4	54.3226	-1.56181	0.400302	-3.90159	9.55616e-05	0.000458562
KLHL13	174.736	-1.5602	0.23243	-6.71253	1.9128e-11	2.29959e-10
LOC100505549	21.4728	-1.56013	0.630718	-2.47358	0.0133768	0.0377276
FRMD4B	198.305	-1.55938	0.219247	-7.11247	1.13983e-12	1.53429e-11
TPPP	362.214	-1.55633	0.176683	-8.80859	1.26729e-18	2.65053e-17
TNFRSF21	1148.35	-1.5563	0.110052	-14.1415	2.10675e-45	1.44258e-43
LOC100133669	19.8832	-1.55508	0.656309	-2.36944	0.0178151	0.0482109
CORO2A	1037.99	-1.55356	0.114187	-13.6054	3.72172e-42	2.30762e-40
ENTPD7	503.258	-1.55109	0.147625	-10.507	8.02332e-26	2.58933e-24
BGN	217.584	-1.54999	0.208388	-7.43801	1.02212e-13	1.52437e-12
VSIG1	44.4643	-1.54745	0.445234	-3.4756	0.000509718	0.00211029
ZBTB39	273.412	-1.54661	0.189405	-8.16563	3.19773e-16	5.83558e-15
ZIC5	151.106	-1.54477	0.249995	-6.17921	6.44216e-10	6.49121e-09
QRICH2	27.4744	-1.54267	0.565336	-2.72877	0.00635708	0.0198057
CDK18	65.9582	-1.54126	0.375209	-4.10774	3.99556e-05	0.00020645
PUS1	293.691	-1.54077	0.182578	-8.43901	3.20024e-17	6.2223e-16
NMNAT3	30.1775	-1.53984	0.559304	-2.75314	0.00590272	0.0186038
FUT4	340.042	-1.53944	0.171421	-8.98043	2.69715e-19	5.89964e-18
PCBP3	53.4972	-1.53852	0.404082	-3.80745	0.000140407	0.000654429
COL17A1	10465.4	-1.53736	0.0739595	-20.7865	5.73112e-96	1.12824e-93
LYN	711.329	-1.53657	0.134567	-11.4186	3.37469e-30	1.33203e-28
SIK1	1418.71	-1.53509	0.103068	-14.8939	3.61167e-50	2.84401e-48
PHLDA2	223.764	-1.53465	0.213318	-7.1942	6.28291e-13	8.72571e-12
CCBL1	58.5392	-1.53325	0.389144	-3.94006	8.14611e-05	0.000395478
SREBF1	627.266	-1.52627	0.147188	-10.3695	3.4127e-25	1.06429e-23
DUSP4	518.902	-1.52306	0.157175	-9.69024	3.31734e-22	8.70747e-21
ULBP3	25.0611	-1.52243	0.587689	-2.59055	0.00958238	0.0283458
SOX7	279.181	-1.52195	0.187441	-8.11964	4.67567e-16	8.46403e-15
RASSF6	157.774	-1.52182	0.240767	-6.32073	2.60325e-10	2.74238e-09
FAT2	1935.45	-1.52114	0.123504	-12.3165	7.38014e-35	3.42861e-33
CRELD1	179.183	-1.5197	0.232649	-6.53217	6.48232e-11	7.4032e-10
TNFAIP1	1213.3	-1.51823	0.108331	-14.0148	1.26643e-44	8.45125e-43
EPPK1	3305.32	-1.51709	0.0912326	-16.6288	4.3081e-62	4.58435e-60
TPPP3	833.431	-1.5161	0.121136	-12.5157	6.1276e-36	3.02519e-34
GPR155	125.698	-1.51207	0.27824	-5.43441	5.49781e-08	4.35758e-07
ACSL4	1721.96	-1.51037	0.104688	-14.4274	3.47845e-47	2.53621e-45
TCF15	19.5938	-1.50883	0.664585	-2.27033	0.0231875	0.0603704
SLC29A2	60.7033	-1.50878	0.380628	-3.96394	7.37226e-05	0.000361281
STAB1	18.2323	-1.50557	0.689679	-2.18301	0.0290354	0.0731764
TFEC	33.5444	-1.50381	0.51081	-2.94397	0.0032403	0.0110219
PIR	193.883	-1.50204	0.228963	-6.56017	5.37476e-11	6.18313e-10
SEMA3F	622.101	-1.50086	0.138669	-10.8233	2.66913e-27	9.19828e-26
POLR1C	503.733	-1.50015	0.158176	-9.48404	2.44615e-21	6.13447e-20
ARID5A	102.756	-1.49928	0.34072	-4.40034	1.08083e-05	6.16517e-05
LAMB3	15128.2	-1.4929	0.0751444	-19.8671	7.84137e-88	1.47016e-85
SYT12	436.771	-1.49226	0.15499	-9.62809	6.08493e-22	1.57101e-20
EHD3	379.084	-1.49043	0.165015	-9.03208	1.68434e-19	3.73615e-18
DNAH1	56.1048	-1.4896	0.392638	-3.79384	0.000148336	0.000688518
KLK8	401.337	-1.48714	0.163998	-9.06807	1.21141e-19	2.7294e-18
MAPK15	32.1423	-1.48408	0.520312	-2.85228	0.00434066	0.0142573
TM7SF2	69.2282	-1.48268	0.360774	-4.10973	3.96117e-05	0.000204875
CADM4	212.051	-1.48101	0.210252	-7.04397	1.86837e-12	2.47477e-11
SIAH2	1573.99	-1.47939	0.105543	-14.017	1.22695e-44	8.22262e-43
LOC100130872	16.8171	-1.47373	0.709687	-2.07659	0.037839	0.0916528
SERINC5	332.195	-1.47181	0.172812	-8.51681	1.64011e-17	3.2328e-16
PARD6G	262.69	-1.47118	0.191122	-7.6976	1.38649e-14	2.22815e-13
CEBPD	208.487	-1.46793	0.22923	-6.40375	1.5161e-10	1.64556e-09
SQRDL	120.281	-1.46682	0.274291	-5.34768	8.90886e-08	6.9048e-07
TMEM135	214.611	-1.46326	0.215511	-6.78971	1.12363e-11	1.38142e-10
DENND2C	96.163	-1.46185	0.302817	-4.8275	1.38257e-06	9.00289e-06
SYTL3	574.218	-1.45712	0.139498	-10.4455	1.53683e-25	4.88959e-24
CAMK2A	98.5196	-1.45337	0.302664	-4.80192	1.57149e-06	1.01224e-05
RASA3	548.675	-1.45151	0.148572	-9.76976	1.51813e-22	4.087e-21
OAF	141.117	-1.45103	0.284854	-5.09392	3.50726e-07	2.49372e-06
IDI2	49.0901	-1.44934	0.449715	-3.2228	0.00126945	0.00479092
ABHD6	141.548	-1.44725	0.252825	-5.72431	1.03855e-08	9.08674e-08
RGCC	46.8226	-1.44692	0.43776	-3.30528	0.000948801	0.0036932
SLC34A3	27.4469	-1.4469	0.562555	-2.57202	0.0101106	0.029702
SLC7A11	3721.58	-1.44218	0.0833961	-17.2931	5.29921e-67	6.32252e-65
TRIM7	101.999	-1.44174	0.293445	-4.91315	8.96246e-07	6.01405e-06
KIAA1644	1088.06	-1.44096	0.114719	-12.5608	3.46917e-36	1.73447e-34
TMEM91	97.344	-1.43993	0.303728	-4.74087	2.12804e-06	1.34705e-05
TMEM229B	30.2913	-1.43853	0.537084	-2.67841	0.00739726	0.0226037
PIGH	88.6283	-1.43461	0.314063	-4.56792	4.92598e-06	2.9554e-05
MSMO1	986.914	-1.43026	0.134358	-10.6452	1.83646e-26	6.08894e-25
STEAP4	325.793	-1.42804	0.195164	-7.31712	2.53341e-13	3.65708e-12
CYGB	81.0179	-1.42745	0.327872	-4.35367	1.33877e-05	7.53549e-05
WDFY2	120.189	-1.42369	0.271876	-5.23654	1.63617e-07	1.22298e-06
SERPINF1	35.3296	-1.42343	0.501651	-2.8375	0.00454687	0.0148323
HSD11B2	20.5818	-1.42206	0.649571	-2.18923	0.0285802	0.0722023
C5AR1	20.9286	-1.42124	0.633585	-2.24318	0.0248854	0.0642175
ADSSL1	123.484	-1.42054	0.269259	-5.27576	1.32206e-07	1.0038e-06
LRRC8A	3009.89	-1.41893	0.0859686	-16.5052	3.366e-61	3.51067e-59
SLC30A1	480.179	-1.41835	0.150612	-9.41721	4.63229e-21	1.14348e-19
SNORD31	27.7791	-1.41805	0.57844	-2.4515	0.0142261	0.0397317
RCAN1	701.865	-1.41796	0.140949	-10.0601	8.29327e-24	2.41425e-22
MMRN2	109.591	-1.41607	0.28324	-4.99956	5.74616e-07	3.96218e-06
TYW1B	26.8106	-1.41306	0.559564	-2.52528	0.0115606	0.0332119
CROCC	142.424	-1.41132	0.259554	-5.43748	5.40386e-08	4.28743e-07
IL4R	1629.09	-1.41103	0.0995132	-14.1793	1.23006e-45	8.57181e-44
RGS12	629.843	-1.41039	0.135901	-10.3781	3.11969e-25	9.74842e-24
KCNK6	215.429	-1.4102	0.209983	-6.71579	1.87051e-11	2.25219e-10
TMPRSS11D	113.288	-1.40449	0.282991	-4.96302	6.94042e-07	4.73181e-06
TRAPPC12	183.858	-1.40321	0.226946	-6.18302	6.28876e-10	6.34882e-09
SIPA1L3	1039.63	-1.39975	0.117028	-11.9608	5.69983e-33	2.47291e-31
ZNF786	101.977	-1.39887	0.293663	-4.76352	1.90249e-06	1.21157e-05
HPS6	328.182	-1.39868	0.17485	-7.99929	1.2514e-15	2.18496e-14
POU2F2	25.3205	-1.3951	0.580272	-2.40421	0.0162075	0.0445233
NOP16	317.483	-1.39479	0.177411	-7.86195	3.78203e-15	6.3568e-14
PLK1S1	423.459	-1.39194	0.15772	-8.82538	1.0909e-18	2.29074e-17
SYK	338.346	-1.39026	0.17383	-7.99783	1.26635e-15	2.20861e-14
ARHGAP25	55.5942	-1.38696	0.39179	-3.54005	0.000400045	0.00169409
LPAR3	313.657	-1.38627	0.177065	-7.82917	4.9109e-15	8.17566e-14
MANF	753.52	-1.38545	0.12461	-11.1183	1.02201e-28	3.7519e-27
HR	562.728	-1.3832	0.14086	-9.8197	9.26215e-23	2.51934e-21
THBS2	85.2626	-1.38248	0.31823	-4.34428	1.39736e-05	7.83727e-05
NOV	131.932	-1.38141	0.261091	-5.29092	1.21701e-07	9.29972e-07
TMEM63B	925.575	-1.37456	0.11642	-11.8068	3.59865e-32	1.52763e-30
SLC6A2	63.9013	-1.37265	0.371064	-3.69924	0.000216249	0.000964518
SLC7A8	321.973	-1.37257	0.189331	-7.2496	4.18001e-13	5.86729e-12
BICD2	2992.2	-1.37066	0.0863287	-15.8772	9.11699e-57	8.29962e-55
CMTM3	103.923	-1.37065	0.290303	-4.72144	2.34179e-06	1.47229e-05
RABGGTA	241.085	-1.36963	0.200719	-6.82361	8.87831e-12	1.10708e-10
RASD1	95.6756	-1.36858	0.322477	-4.24395	2.19615e-05	0.000118938
RGMB	256.209	-1.36619	0.191853	-7.121	1.07144e-12	1.44471e-11
CELSR1	1259.16	-1.3659	0.109929	-12.4253	1.90567e-35	9.29179e-34
SLC5A10	141.69	-1.36552	0.252246	-5.41344	6.18243e-08	4.87006e-07
CAPN3	21.0251	-1.36429	0.642424	-2.12367	0.0336981	0.0829496
PLD2	210.978	-1.36183	0.209466	-6.50146	7.95456e-11	8.94832e-10
GNA15	667.22	-1.36121	0.142237	-9.57001	1.06898e-21	2.72859e-20
SNORA5A	65.6609	-1.36109	0.360885	-3.77154	0.000162243	0.000743644
PRKX	193.449	-1.36103	0.221091	-6.15595	7.46282e-10	7.49088e-09
PIGF	87.0878	-1.35902	0.323466	-4.20142	2.65247e-05	0.000141414
CAMK1G	34.482	-1.35533	0.497573	-2.72387	0.00645219	0.0200346
GPR98	19.0056	-1.35463	0.665885	-2.03433	0.0419182	0.09995
PLEK2	620.308	-1.35269	0.134037	-10.0919	5.99865e-24	1.75927e-22
C1R	1072.09	-1.35265	0.115167	-11.7451	7.47938e-32	3.13279e-30
POP1	669.52	-1.3475	0.131048	-10.2825	8.45158e-25	2.57637e-23
C4orf36	33.4646	-1.34699	0.515869	-2.61111	0.00902476	0.0268628
SSH1	1169.83	-1.34696	0.122697	-10.978	4.87765e-28	1.73014e-26
AHRR	870.441	-1.34274	0.120641	-11.13	8.95894e-29	3.31207e-27
MACC1	667.458	-1.34271	0.13375	-10.0389	1.0278e-23	2.97007e-22
GGT6	46.8638	-1.3427	0.456819	-2.93924	0.00329016	0.0111746
C3orf58	551.472	-1.33984	0.146983	-9.11563	7.82137e-20	1.7852e-18
PLEKHH1	120.948	-1.33851	0.27145	-4.93095	8.18321e-07	5.53359e-06
SLC47A2	1164.59	-1.33817	0.109194	-12.2549	1.58074e-34	7.21598e-33
PROSAPIP1	128.043	-1.33784	0.266926	-5.01203	5.38577e-07	3.73002e-06
CYP1B1	2798.95	-1.33503	0.0920931	-14.4965	1.27522e-47	9.51821e-46
CDKL1	37.9692	-1.33441	0.471628	-2.82937	0.00466395	0.0151448
CHST15	454.224	-1.33402	0.156406	-8.52918	1.47383e-17	2.9087e-16
BCL7A	196.316	-1.33285	0.217532	-6.12717	8.94575e-10	8.88875e-09
DHCR7	911.035	-1.33105	0.118665	-11.2169	3.36709e-29	1.26559e-27
SESN3	800.881	-1.33103	0.12383	-10.7488	6.00096e-27	2.03245e-25
DST	15198.3	-1.32987	0.0941452	-14.1257	2.63638e-45	1.79742e-43
MAPK10	54.7181	-1.32928	0.402954	-3.29884	0.00097086	0.00376603
TACC2	229.721	-1.32889	0.2346	-5.66449	1.47466e-08	1.25674e-07
C1S	1409.98	-1.32872	0.104132	-12.7599	2.74636e-37	1.45631e-35
CBLC	208.916	-1.32865	0.209231	-6.35016	2.15092e-10	2.29505e-09
KATNBL1	1771.08	-1.32732	0.124238	-10.6837	1.21331e-26	4.057e-25
PCSK6	84.8354	-1.32643	0.320262	-4.1417	3.44745e-05	0.000180139
THEM4	212.965	-1.32581	0.20818	-6.36856	1.90811e-10	2.04986e-09
FEM1B	1265.69	-1.3224	0.133223	-9.92618	3.20301e-23	8.99183e-22
SPRED2	309.924	-1.32197	0.191358	-6.90833	4.90389e-12	6.26369e-11
KIAA0040	261.649	-1.32129	0.190521	-6.93514	4.05809e-12	5.21721e-11
TRAPPC6A	76.0754	-1.31997	0.343537	-3.84228	0.000121897	0.000574606
PFKFB4	144.819	-1.31883	0.249778	-5.28	1.29185e-07	9.8334e-07
SLC9A3	186.247	-1.31635	0.222034	-5.92859	3.05547e-09	2.85922e-08
NLRP1	161.546	-1.31626	0.242475	-5.42844	5.68479e-08	4.49673e-07
KDM6A	1633.52	-1.31614	0.1112	-11.8358	2.5486e-32	1.0907e-30
ELMO1	30.0272	-1.31603	0.527427	-2.49519	0.012589	0.0357876
LACC1	120.201	-1.31428	0.275078	-4.77785	1.77179e-06	1.13155e-05
MFAP5	26.2108	-1.31384	0.575416	-2.28329	0.0224134	0.0586848
PLAU	628.706	-1.31358	0.145375	-9.03582	1.62778e-19	3.62088e-18
LRP8	705.215	-1.31015	0.128359	-10.2069	1.84599e-24	5.50616e-23
GPR75	55.9199	-1.31015	0.389952	-3.35976	0.00078009	0.00309462
URB2	1025.35	-1.30792	0.113015	-11.573	5.65028e-31	2.29939e-29
ALKBH2	210.546	-1.30779	0.215457	-6.06986	1.28023e-09	1.25778e-08
KLHL21	1140.82	-1.30779	0.11455	-11.4167	3.45002e-30	1.35836e-28
HTRA3	799.994	-1.30451	0.121955	-10.6966	1.05592e-26	3.54578e-25
CCNJ	153.18	-1.3038	0.242001	-5.38758	7.14139e-08	5.60108e-07
POLR1B	730.287	-1.30358	0.127483	-10.2255	1.52424e-24	4.59871e-23
TMEM140	121.229	-1.30295	0.268582	-4.85124	1.22693e-06	8.05456e-06
ADAMTS15	946.438	-1.30155	0.129497	-10.0508	9.10969e-24	2.64702e-22
ABTB1	124.815	-1.30008	0.272341	-4.77372	1.8085e-06	1.15312e-05
LENG9	70.1849	-1.29991	0.359368	-3.61722	0.000297783	0.00129124
ASB13	219.975	-1.29849	0.208237	-6.23565	4.49914e-10	4.64332e-09
SECTM1	111.537	-1.29825	0.284775	-4.55888	5.1427e-06	3.08073e-05
RMDN2	43.2502	-1.29703	0.440059	-2.94739	0.00320466	0.0109182
MYCL1	71.7571	-1.29572	0.345393	-3.75144	0.000175819	0.00079982
SRSF6	4401.44	-1.29331	0.0818057	-15.8095	2.67407e-56	2.39284e-54
CEL	52.0147	-1.29209	0.402413	-3.21087	0.00132336	0.00498007
GPR85	27.1036	-1.29117	0.563911	-2.28966	0.0220409	0.0578924
CTU1	57.695	-1.28184	0.384966	-3.32975	0.000869234	0.0034113
LYAR	804.523	-1.28121	0.121422	-10.5517	4.98826e-26	1.6198e-24
ENDOV	127.696	-1.28075	0.274437	-4.66684	3.05873e-06	1.89355e-05
ZSCAN5A	72.0761	-1.27969	0.364971	-3.50627	0.000454433	0.00190596
S100A3	56.6008	-1.27889	0.394254	-3.24383	0.00117936	0.00448424
SLC45A4	95.0755	-1.27884	0.308263	-4.14853	3.34613e-05	0.000175135
SH3BP1	332.69	-1.27528	0.175683	-7.25901	3.89945e-13	5.49307e-12
DKK3	2359.72	-1.27513	0.0893415	-14.2726	3.24296e-46	2.26993e-44
FMNL2	1041.08	-1.27239	0.129219	-9.84682	7.07495e-23	1.94796e-21
GLB1L2	60.9603	-1.27157	0.378191	-3.36223	0.000773144	0.00307171
FSIP2	54.4665	-1.26858	0.402872	-3.14886	0.00163911	0.00602577
GANC	128.944	-1.26765	0.265497	-4.77463	1.80037e-06	1.1484e-05
WDR47	772.526	-1.26708	0.130475	-9.71132	2.69832e-22	7.15419e-21
DHRS7	406.678	-1.26357	0.15934	-7.93003	2.19095e-15	3.77107e-14
AUTS2	37.7994	-1.26099	0.479013	-2.63247	0.0084766	0.0255108
CFD	22.6696	-1.2608	0.617178	-2.04284	0.0410682	0.0982655
IGSF3	307.829	-1.2607	0.176091	-7.15936	8.10564e-13	1.11005e-11
ARG2	266.387	-1.25994	0.191679	-6.57316	4.92591e-11	5.69172e-10
REEP1	48.009	-1.25961	0.419587	-3.00202	0.00268194	0.00931374
SNORA9	55.816	-1.25655	0.3877	-3.24104	0.00119095	0.00451958
NIP7	999.829	-1.25649	0.115863	-10.8446	2.11551e-27	7.32246e-26
RCL1	284.479	-1.25333	0.181962	-6.88786	5.66382e-12	7.18771e-11
AHDC1	192.622	-1.25312	0.218189	-5.74327	9.28679e-09	8.18453e-08
FAM83G	657.187	-1.25121	0.132638	-9.43329	3.97433e-21	9.8881e-20
OXSR1	1611.13	-1.24868	0.0988873	-12.6273	1.49395e-36	7.58973e-35
NAPRT1	1728.85	-1.24559	0.109756	-11.3487	7.52678e-30	2.9269e-28
BNC1	2469.1	-1.24447	0.0896951	-13.8744	9.04997e-44	5.91402e-42
LINC00319	54.8411	-1.24437	0.405441	-3.06918	0.0021465	0.00765463
COX6B2	196.036	-1.24238	0.220666	-5.63012	1.80086e-08	1.5183e-07
TINCR	75.2363	-1.24161	0.345336	-3.59535	0.000323951	0.00139244
SNORD110	29.5972	-1.24019	0.531032	-2.33544	0.0195206	0.0521947
MGC16275	22.9243	-1.23803	0.606996	-2.0396	0.04139	0.0988702
DLK2	193.944	-1.23728	0.21509	-5.75235	8.80122e-09	7.774e-08
GPC1	5039.45	-1.23674	0.0795005	-15.5563	1.44103e-54	1.24015e-52
C16orf74	196.44	-1.23618	0.216944	-5.69815	1.21111e-08	1.04457e-07
FAM60A	737.319	-1.2353	0.124666	-9.90886	3.80954e-23	1.06001e-21
ECHDC2	61.1959	-1.23516	0.375539	-3.28905	0.00100527	0.0038842
GJB5	601.68	-1.2341	0.137319	-8.98711	2.53817e-19	5.55962e-18
BCAT2	196.405	-1.23372	0.217554	-5.67085	1.4209e-08	1.21486e-07
TMEM256	195.984	-1.23326	0.217946	-5.65855	1.52658e-08	1.29887e-07
WLS	1013.18	-1.23299	0.112141	-10.995	4.04112e-28	1.43665e-26
ZNF30	66.5245	-1.23052	0.358088	-3.43636	0.000589593	0.00240619
ADA	511.536	-1.23047	0.151606	-8.11619	4.81038e-16	8.68793e-15
CLN8	355.989	-1.22599	0.167296	-7.32831	2.33067e-13	3.3768e-12
KCNN4	198.542	-1.22537	0.21594	-5.67458	1.39028e-08	1.19062e-07
DCAKD	379.889	-1.22513	0.167953	-7.29452	2.99716e-13	4.30677e-12
PMM2	1000.26	-1.22496	0.113419	-10.8003	3.43267e-27	1.17524e-25
CSRP2	642.778	-1.22462	0.131779	-9.29298	1.50025e-20	3.56371e-19
DUSP1	209.545	-1.22358	0.227254	-5.38421	7.27648e-08	5.69704e-07
ITGA6	21033.7	-1.2227	0.0705535	-17.3301	2.78647e-67	3.34994e-65
ALDH2	292.075	-1.22192	0.183996	-6.64103	3.11507e-11	3.68866e-10
ALDOC	794.91	-1.22187	0.137303	-8.8991	5.63018e-19	1.20475e-17
IPPK	530.155	-1.22006	0.14292	-8.53662	1.38207e-17	2.73789e-16
GCH1	335.899	-1.2194	0.172087	-7.08599	1.38057e-12	1.84886e-11
ANK3	36.204	-1.21883	0.476655	-2.55706	0.0105562	0.0308099
AGPAT2	362.371	-1.2173	0.18727	-6.50028	8.01732e-11	9.01248e-10
UGT1A6	365.492	-1.21688	0.180194	-6.75319	1.44632e-11	1.76301e-10
KLF8	30.2378	-1.21555	0.530403	-2.29176	0.0219197	0.0576125
TNK1	185.124	-1.21509	0.21955	-5.53448	3.12159e-08	2.55918e-07
ZNF74	127.178	-1.21375	0.27	-4.4954	6.94406e-06	4.11135e-05
PDE2A	92.3482	-1.21209	0.309927	-3.91088	9.19606e-05	0.000443172
PERP	6193.9	-1.21042	0.0765913	-15.8036	2.93857e-56	2.61466e-54
ZNF121	471.49	-1.21027	0.158373	-7.64193	2.13984e-14	3.39037e-13
IL32	325.74	-1.21004	0.176829	-6.84301	7.75459e-12	9.70032e-11
HOXD13	46.8668	-1.20963	0.428722	-2.82148	0.00478028	0.015472
POGLUT1	390.663	-1.20697	0.161993	-7.45073	9.28269e-14	1.39099e-12
CCDC88C	160.615	-1.2061	0.234361	-5.14634	2.6562e-07	1.92688e-06
PPP1R3B	655.3	-1.20511	0.308951	-3.90065	9.59362e-05	0.000459659
STOM	1815.5	-1.20187	0.0949981	-12.6515	1.09787e-36	5.63203e-35
LOC284080	39.8078	-1.20164	0.475753	-2.52576	0.0115447	0.0331858
RAPGEF5	260.505	-1.20071	0.188571	-6.36744	1.92214e-10	2.06351e-09
LUM	302.797	-1.19876	0.182329	-6.57471	4.8749e-11	5.63692e-10
PYROXD1	271.044	-1.19633	0.185558	-6.44719	1.13945e-10	1.25667e-09
ARMC7	120.735	-1.1961	0.271541	-4.40488	1.05843e-05	6.04835e-05
KBTBD7	139.468	-1.19534	0.252469	-4.73461	2.19478e-06	1.38706e-05
C10orf2	206.468	-1.1953	0.21001	-5.69162	1.25838e-08	1.08237e-07
BMP8B	46.0231	-1.19453	0.425183	-2.80945	0.0049626	0.0159959
LINC00704	25.0044	-1.19084	0.579774	-2.05398	0.0399778	0.0962267
KCNJ2	26.1357	-1.19034	0.566663	-2.10061	0.035675	0.0872702
CAB39	5394.74	-1.18836	0.0918915	-12.9322	2.96069e-38	1.61342e-36
LOC100129046	43.1368	-1.18836	0.438121	-2.7124	0.00667986	0.020656
CCDC87	31.4341	-1.18673	0.50929	-2.33016	0.0197978	0.0527662
PRKCH	263.043	-1.18644	0.188573	-6.29169	3.1403e-10	3.27744e-09
COL4A6	282.58	-1.18577	0.194715	-6.08976	1.13078e-09	1.11653e-08
KCNS3	217.728	-1.18337	0.20417	-5.79601	6.79116e-09	6.09077e-08
XG	209.518	-1.18262	0.210825	-5.60948	2.02935e-08	1.70092e-07
ADAMTS1	5088.42	-1.17945	0.0794505	-14.8451	7.48089e-50	5.86152e-48
C9orf96	31.4787	-1.17899	0.518905	-2.27207	0.0230824	0.0601763
PDIA5	241.183	-1.17875	0.198005	-5.95312	2.63081e-09	2.49144e-08
IRF2BPL	328.669	-1.17817	0.179367	-6.56849	5.08294e-11	5.86456e-10
MT1X	214.868	-1.17774	0.206498	-5.70337	1.17461e-08	1.01755e-07
CD3EAP	267.26	-1.17676	0.188873	-6.23043	4.65157e-10	4.78495e-09
CCDC126	128.016	-1.17542	0.272016	-4.32115	1.55219e-05	8.63493e-05
CKB	1212	-1.17338	0.125428	-9.35502	8.35872e-21	2.01595e-19
SP6	44.7205	-1.17296	0.440908	-2.66034	0.00780623	0.0237062
C8orf42	158.77	-1.16962	0.249597	-4.68602	2.7857e-06	1.73475e-05
MYOM3	51.5636	-1.16892	0.400569	-2.91815	0.00352113	0.0118568
WDR54	486.339	-1.16763	0.153125	-7.62538	2.43325e-14	3.81686e-13
ZNF800	691.756	-1.16754	0.137779	-8.47405	2.36999e-17	4.63664e-16
ANG	46.3153	-1.16408	0.422102	-2.75781	0.00581906	0.0183951
NOXO1	50.7963	-1.16361	0.423229	-2.74935	0.00597135	0.0187961
TSTD1	195.526	-1.16174	0.222702	-5.21658	1.82254e-07	1.35393e-06
SELRC1	666.369	-1.1603	0.12905	-8.99114	2.44685e-19	5.37453e-18
MON1A	62.9789	-1.15966	0.372874	-3.11006	0.00187047	0.0067907
PROS1	101.955	-1.15715	0.296368	-3.90445	9.4439e-05	0.00045356
TSPAN9	249.77	-1.15517	0.197253	-5.85629	4.73328e-09	4.32393e-08
LOC728431	105.157	-1.1521	0.285499	-4.03537	5.45168e-05	0.000274747
SRSF7	3321.71	-1.15057	0.0844138	-13.6301	2.65332e-42	1.65822e-40
COL8A2	943.355	-1.15016	0.11816	-9.73387	2.162e-22	5.76131e-21
ADIRF	1300.22	-1.15012	0.123656	-9.30093	1.39216e-20	3.31697e-19
DHDH	26.2453	-1.14896	0.562099	-2.04405	0.0409483	0.0980529
IRX4	604.406	-1.14782	0.156654	-7.32706	2.35259e-13	3.40229e-12
PPP1R10	901.894	-1.14752	0.118581	-9.67706	3.77423e-22	9.8738e-21
APC2	98.0327	-1.14355	0.303174	-3.77194	0.000161982	0.000742663
NRG1	1309.67	-1.14349	0.117197	-9.75698	1.72201e-22	4.62797e-21
PVRL1	1486.02	-1.1429	0.117903	-9.69356	3.21149e-22	8.45782e-21
RAB30	63.4223	-1.14156	0.361874	-3.15457	0.00160735	0.00592838
ALDH7A1	585.185	-1.14117	0.148064	-7.70724	1.28567e-14	2.07247e-13
TNNT1	382.158	-1.14098	0.164563	-6.93338	4.109e-12	5.27836e-11
TRPV1	90.8496	-1.14069	0.308843	-3.69344	0.000221244	0.000984009
RTKN	448.404	-1.13952	0.151427	-7.52526	5.26145e-14	8.01379e-13
OSGIN1	152.417	-1.13919	0.246834	-4.6152	3.92726e-06	2.38989e-05
MOB3B	233.605	-1.13899	0.202994	-5.61097	2.012e-08	1.68727e-07
MAPKBP1	423.114	-1.13566	0.158659	-7.15786	8.19471e-13	1.1203e-11
TMEM161A	91.6241	-1.13385	0.303217	-3.73941	0.000184454	0.0008362
FBXL18	1068.67	-1.13307	0.109808	-10.3186	5.80461e-25	1.78898e-23
GLI2	33.4694	-1.13241	0.496742	-2.27968	0.0226265	0.0591444
ITGA2	1648.24	-1.12955	0.105099	-10.7475	6.09099e-27	2.05852e-25
PPAN	31.496	-1.12749	0.518393	-2.17496	0.0296327	0.0745145
ARHGAP22	132.574	-1.127	0.255622	-4.40885	1.0392e-05	5.96361e-05
C20orf194	701.527	-1.12596	0.132853	-8.47525	2.34571e-17	4.59486e-16
NDUFAF4	239.005	-1.12559	0.195449	-5.759	8.46113e-09	7.49462e-08
MAFK	553.99	-1.12178	0.153963	-7.28601	3.19271e-13	4.56279e-12
CDC42EP5	34.8299	-1.12059	0.491992	-2.27765	0.0227475	0.0594194
LRRC28	55.3267	-1.1198	0.403224	-2.77712	0.00548435	0.0174667
ESF1	1486.64	-1.119	0.258025	-4.33678	1.44585e-05	8.08042e-05
EHD1	1789.18	-1.11771	0.114176	-9.78937	1.25072e-22	3.38448e-21
ZNF202	397.592	-1.11761	0.158134	-7.06747	1.57787e-12	2.10236e-11
ITM2B	2820.47	-1.11751	0.0858358	-13.0192	9.51411e-39	5.35135e-37
ACTG1	40618.8	-1.11692	0.0758834	-14.7188	4.87945e-49	3.7124e-47
PLP2	1749.81	-1.11591	0.0966052	-11.5512	7.27917e-31	2.94703e-29
SNHG15	627.734	-1.11558	0.138453	-8.05745	7.79048e-16	1.38635e-14
DAPK3	558.884	-1.1149	0.158365	-7.04002	1.92215e-12	2.54387e-11
SNHG16	1891.79	-1.11483	0.0956114	-11.66	2.0411e-31	8.39301e-30
EDARADD	139.187	-1.11477	0.262966	-4.2392	2.24314e-05	0.000121108
RIMKLB	421.486	-1.11439	0.155664	-7.15897	8.12866e-13	1.11224e-11
TFCP2L1	136.543	-1.1143	0.273128	-4.07977	4.50809e-05	0.000230139
KCTD6	63.8641	-1.11423	0.360096	-3.09426	0.00197304	0.00712038
ZBTB49	80.9645	-1.1139	0.331649	-3.35868	0.000783144	0.00310361
LPAR6	45.8695	-1.11381	0.430507	-2.5872	0.00967581	0.0285774
RRS1	468.842	-1.11356	0.147442	-7.55251	4.26946e-14	6.55358e-13
MGAM	35.6485	-1.11165	0.482606	-2.30343	0.0212548	0.0560434
GPR115	226.451	-1.11122	0.206386	-5.38416	7.2782e-08	5.69704e-07
PHLDA1	4190.62	-1.11115	0.085766	-12.9556	2.18459e-38	1.2072e-36
LOC100287314	142.922	-1.11013	0.248183	-4.47302	7.71243e-06	4.52377e-05
SRF	862.539	-1.11001	0.117785	-9.42403	4.3411e-21	1.07666e-19
LOC100128338	436.449	-1.107	0.152239	-7.27148	3.55583e-13	5.03152e-12
YPEL1	44.0287	-1.10673	0.452245	-2.44719	0.0143973	0.0401387
AURKAPS1	38.9769	-1.10639	0.457209	-2.41989	0.0155253	0.0429112
ST3GAL5	38.3134	-1.10583	0.474085	-2.33256	0.0196712	0.0524861
HLF	56.8403	-1.10393	0.384729	-2.86936	0.00411302	0.0136093
GATS	97.6483	-1.10364	0.295548	-3.73421	0.000188308	0.000850491
CTSS	47.9821	-1.10309	0.421695	-2.61586	0.00890035	0.0265678
SAT1	821.245	-1.10285	0.142175	-7.75694	8.70005e-15	1.42134e-13
TDG	673.202	-1.10262	0.13044	-8.45308	2.83726e-17	5.52337e-16
SYNGR2	745.569	-1.1016	0.129588	-8.50079	1.88305e-17	3.70239e-16
ENKUR	32.7918	-1.09982	0.498176	-2.20768	0.0272663	0.0694062
BTG2	280.851	-1.09981	0.181626	-6.05538	1.40088e-09	1.36779e-08
C9orf156	252.772	-1.09906	0.192794	-5.70067	1.19339e-08	1.03154e-07
ING5	246.142	-1.09838	0.198406	-5.53602	3.0942e-08	2.53938e-07
TMSB10	8429.9	-1.09656	0.0859154	-12.7633	2.62898e-37	1.39877e-35
FAM211B	29.6213	-1.09323	0.533994	-2.04727	0.0406318	0.0973543
MFSD10	630.631	-1.09187	0.144897	-7.53548	4.86545e-14	7.425e-13
WDR91	429.685	-1.08758	0.152331	-7.13959	9.36111e-13	1.26984e-11
DUSP18	61.5091	-1.08644	0.371068	-2.92786	0.00341306	0.0115274
CPQ	32.1323	-1.08626	0.506521	-2.14455	0.0319886	0.0794922
ZC3H12A	577.283	-1.08617	0.139538	-7.78406	7.02337e-15	1.1534e-13
RPE65	53.4622	-1.08598	0.44598	-2.43504	0.0148903	0.0413448
FDXACB1	86.5113	-1.08568	0.316533	-3.42992	0.000603769	0.00245387
CYP2J2	61.1567	-1.08553	0.369063	-2.94131	0.00326823	0.0111073
FRMD8	1012.91	-1.08524	0.113191	-9.58768	9.00845e-22	2.31442e-20
MOB3A	182.034	-1.08354	0.228954	-4.73256	2.21703e-06	1.39944e-05
KCNJ15	550.203	-1.08092	0.146676	-7.36947	1.71313e-13	2.50279e-12
HSD17B6	36.846	-1.0758	0.483734	-2.22395	0.0261519	0.0670464
ARVCF	150.03	-1.07547	0.247959	-4.33729	1.44248e-05	8.06448e-05
DDX26B	162.65	-1.07516	0.240845	-4.46413	8.03944e-06	4.70331e-05
B3GALT6	486.035	-1.07495	0.150561	-7.13967	9.35531e-13	1.26984e-11
PTGER4	290.41	-1.07369	0.210469	-5.10138	3.37179e-07	2.40827e-06
MACROD1	151.22	-1.07354	0.23893	-4.49311	7.01916e-06	4.15426e-05
GFOD1	239.449	-1.07352	0.195521	-5.49055	4.00692e-08	3.23781e-07
GPATCH4	610.329	-1.07318	0.136882	-7.84018	4.49884e-15	7.52147e-14
SYNGR3	131.069	-1.0719	0.26448	-4.05286	5.0595e-05	0.000256377
SLC35G1	51.2283	-1.07184	0.403357	-2.65729	0.00787707	0.0238937
PLEKHA1	544.285	-1.07181	0.140509	-7.62803	2.38368e-14	3.74656e-13
MT2A	2422.1	-1.07167	0.0918565	-11.6668	1.88395e-31	7.80798e-30
CXCL3	36.8164	-1.07131	0.46923	-2.28313	0.0224226	0.0586992
PPARD	361.518	-1.07072	0.167357	-6.39782	1.57615e-10	1.70838e-09
TARSL2	135.356	-1.07027	0.254437	-4.20642	2.59447e-05	0.000138556
PAOX	41.7829	-1.06835	0.448652	-2.38125	0.017254	0.0469802
TAF5L	1008.05	-1.06812	0.111409	-9.58736	9.03715e-22	2.31801e-20
DGKA	515.197	-1.06644	0.144833	-7.36322	1.79525e-13	2.61548e-12
NOP2	795.384	-1.06587	0.121552	-8.76884	1.80512e-18	3.74064e-17
LIMA1	6186.69	-1.06534	0.084458	-12.6138	1.77129e-36	8.91248e-35
LTBP4	203.177	-1.06438	0.214284	-4.96715	6.79451e-07	4.64238e-06
RAB26	85.3672	-1.06431	0.324132	-3.28358	0.00102499	0.00395069
MAL2	2691.4	-1.06258	0.0888081	-11.9649	5.42391e-33	2.36103e-31
CCDC78	35.7462	-1.0623	0.478203	-2.22144	0.0263212	0.0674257
DTX2	343.43	-1.06081	0.169521	-6.25772	3.90646e-10	4.04489e-09
LAMC3	186.994	-1.06004	0.217886	-4.8651	1.14401e-06	7.55433e-06
COL9A2	271.459	-1.05915	0.187286	-5.65525	1.55618e-08	1.32334e-07
UCKL1-AS1	59.8526	-1.05825	0.380544	-2.78088	0.0054212	0.0172936
JAG1	5259.42	-1.05775	0.0787378	-13.4339	3.82854e-41	2.26675e-39
DDX21	3523.93	-1.05704	0.0841723	-12.558	3.59281e-36	1.79061e-34
ATXN7L2	87.1732	-1.05146	0.314712	-3.34103	0.000834684	0.00328718
BTBD3	696.157	-1.05057	0.12775	-8.22359	1.97493e-16	3.65489e-15
ACSS2	376.273	-1.05014	0.175979	-5.96739	2.41084e-09	2.29139e-08
PPP4R1L	72.1192	-1.05004	0.33824	-3.10443	0.00190645	0.00689589
HIC2	74.666	-1.04957	0.337665	-3.10832	0.00188157	0.00682626
ZP3	170.532	-1.04789	0.226379	-4.62892	3.67578e-06	2.24728e-05
AFMID	150.905	-1.04783	0.239583	-4.37355	1.22242e-05	6.9177e-05
CHRNB1	91.4884	-1.04652	0.310248	-3.37315	0.000743129	0.00296292
SACS	1191.73	-1.04605	0.109656	-9.53932	1.43768e-21	3.65785e-20
TRIM27	1497.07	-1.04594	0.111645	-9.36843	7.36199e-21	1.78375e-19
ZNF2	124.53	-1.04456	0.262105	-3.98528	6.74017e-05	0.000333494
UNC5B	134.048	-1.04416	0.25582	-4.0816	4.47276e-05	0.000228706
RBM12	1798.99	-1.04278	0.103176	-10.1068	5.1551e-24	1.52037e-22
CCDC127	844.558	-1.04197	0.120345	-8.65825	4.79056e-18	9.7476e-17
ATG16L2	55.9841	-1.04176	0.389521	-2.67446	0.00748504	0.0228276
WDR37	244.495	-1.04091	0.191935	-5.42322	5.85335e-08	4.62309e-07
FDXR	205.76	-1.04051	0.208662	-4.98655	6.14657e-07	4.22533e-06
FASTKD5	955.503	-1.04042	0.114743	-9.06741	1.21884e-19	2.74221e-18
LPAL2	67.3085	-1.03942	0.366393	-2.8369	0.00455541	0.0148506
SLC29A1	423.859	-1.03871	0.156469	-6.63845	3.17004e-11	3.7425e-10
MESDC1	273.356	-1.03774	0.19291	-5.3794	7.47337e-08	5.844e-07
GM2A	998.239	-1.03754	0.112718	-9.20477	3.4239e-20	7.97677e-19
USP31	1821.84	-1.03753	0.0952357	-10.8943	1.2265e-27	4.28296e-26
ZNF146	2337.78	-1.0371	0.0951526	-10.8993	1.1612e-27	4.06395e-26
MRGPRF	55.2827	-1.03523	0.397238	-2.60608	0.0091586	0.0272149
MPP3	119.53	-1.03403	0.277394	-3.72767	0.000193257	0.000870846
SCARB1	763.615	-1.03345	0.127745	-8.08993	5.97002e-16	1.07208e-14
COL27A1	189.008	-1.03227	0.225339	-4.58096	4.62844e-06	2.79071e-05
KIAA0020	1305.04	-1.03144	0.103651	-9.95112	2.49356e-23	7.03782e-22
SDHA	5376.01	-1.03116	0.0830086	-12.4223	1.9776e-35	9.58315e-34
MCL1	5177.12	-1.03027	0.0911854	-11.2986	1.3326e-29	5.09396e-28
MPP7	144.832	-1.02901	0.243384	-4.22791	2.3587e-05	0.000126782
NHSL1	152.275	-1.02869	0.255598	-4.02463	5.70662e-05	0.000286313
SNX18	584.046	-1.02824	0.137978	-7.4522	9.17954e-14	1.37684e-12
YWHAG	6796.4	-1.02654	0.0753463	-13.6242	2.87376e-42	1.78888e-40
FBLIM1	1482.96	-1.0262	0.101059	-10.1545	3.16564e-24	9.38901e-23
TKT	4528.2	-1.0258	0.0893583	-11.4796	1.67074e-30	6.64455e-29
SRXN1	4368.14	-1.02555	0.079532	-12.8948	4.81213e-38	2.59542e-36
PPP2R2D	359.943	-1.02533	0.165343	-6.20124	5.60185e-10	5.6992e-09
SERPINB5	4631.96	-1.0243	0.0787798	-13.002	1.19176e-38	6.67936e-37
APP	8666.06	-1.02429	0.0761065	-13.4586	2.73988e-41	1.62831e-39
NR6A1	68.5499	-1.02382	0.34539	-2.96423	0.0030344	0.010416
PDCD1LG2	84.5275	-1.02313	0.330041	-3.10001	0.00193516	0.0069933
GRAMD4	390.221	-1.02246	0.157466	-6.49325	8.40023e-11	9.40933e-10
RNF141	706.637	-1.02232	0.126704	-8.06851	7.11615e-16	1.27355e-14
GNL3	1354.75	-1.02148	0.102211	-9.99378	1.62267e-23	4.62961e-22
JAM3	38.3406	-1.02094	0.472603	-2.16024	0.0307542	0.076905
FRMD4A	105.923	-1.01815	0.295703	-3.44315	0.000574983	0.00235695
WDR43	2636.84	-1.01671	0.0877877	-11.5814	5.11806e-31	2.08819e-29
RDH13	146.274	-1.01541	0.243907	-4.16313	3.1392e-05	0.000164963
SYNPO2	54.713	-1.01471	0.392353	-2.58621	0.00970379	0.0286457
HIST1H4L	852.459	-1.01431	0.129031	-7.86094	3.81252e-15	6.39745e-14
F3	52516	-1.01409	0.0702859	-14.4281	3.44456e-47	2.52318e-45
PRDX5	3139.92	-1.01352	0.098514	-10.2881	7.97331e-25	2.43829e-23
DUXA	39.3246	-1.00864	0.45254	-2.22884	0.0258245	0.0662718
EML2	335.276	-1.00821	0.172064	-5.8595	4.64275e-09	4.25108e-08
NKRF	345.715	-1.00739	0.166767	-6.0407	1.5345e-09	1.49086e-08
PTS	458.899	-1.00692	0.156231	-6.44511	1.15518e-10	1.27312e-09
PYCARD	253.648	-1.00584	0.195874	-5.13517	2.81891e-07	2.03274e-06
CYSTM1	227.889	-1.00228	0.203576	-4.9234	8.50546e-07	5.73918e-06
MXI1	331.246	-1.00227	0.172071	-5.82476	5.71959e-09	5.16798e-08
LOC100506990	163.155	-1.00194	0.232744	-4.3049	1.67062e-05	9.24802e-05
MFSD3	198.656	-0.99991	0.226474	-4.41512	1.00953e-05	5.80893e-05
MTERF	242.903	-0.999596	0.194354	-5.14317	2.70137e-07	1.95604e-06
CAV1	19730.9	-0.999052	0.0699292	-14.2866	2.652e-46	1.88137e-44
GPRC5C	114.832	-0.998421	0.278387	-3.58645	0.000335205	0.00143689
FDFT1	1277.26	-0.997462	0.112672	-8.85283	8.53274e-19	1.79655e-17
PPRC1	498.268	-0.996616	0.143556	-6.94236	3.85589e-12	4.96943e-11
SLC25A33	224.398	-0.996389	0.198998	-5.00703	5.52752e-07	3.81811e-06
GSTO2	259.029	-0.995892	0.196022	-5.08052	3.76409e-07	2.6655e-06
ACLY	2429.94	-0.995553	0.0895559	-11.1166	1.04224e-28	3.81727e-27
ITGA1	177.416	-0.993359	0.224089	-4.43288	9.29819e-06	5.37976e-05
CHSY1	733.901	-0.993349	0.128453	-7.7332	1.0488e-14	1.70109e-13
TYMP	167.214	-0.993161	0.234166	-4.24127	2.22256e-05	0.000120038
CDK5R1	177.789	-0.991013	0.221694	-4.47019	7.81513e-06	4.57889e-05
ZNF689	226.381	-0.990274	0.20384	-4.8581	1.18516e-06	7.8064e-06
UTP14A	656.411	-0.9901	0.1302	-7.60448	2.86044e-14	4.44271e-13
WDR3	319.152	-0.989926	0.170853	-5.79402	6.87224e-09	6.15998e-08
ALDH1B1	494.706	-0.989076	0.146349	-6.75833	1.39587e-11	1.70547e-10
PDGFA	1841.82	-0.988888	0.0978756	-10.1035	5.32966e-24	1.56891e-22
LINC00273	73.3493	-0.988588	0.377153	-2.62119	0.00876238	0.0262455
ZNF35	286.283	-0.988445	0.182076	-5.42874	5.6754e-08	4.49155e-07
ZDHHC9	432.243	-0.987285	0.152773	-6.46241	1.03049e-10	1.1413e-09
LANCL2	395.059	-0.987045	0.156583	-6.30364	2.90729e-10	3.04636e-09
RNASE7	275.992	-0.985834	0.186987	-5.2722	1.348e-07	1.02263e-06
GPR153	473.118	-0.984449	0.146651	-6.71289	1.90805e-11	2.29563e-10
PRPF39	680.32	-0.982693	0.128728	-7.63388	2.2779e-14	3.59826e-13
PPP2R2B	130.27	-0.98268	0.263762	-3.72564	0.000194824	0.000876653
LAMC2	19099.9	-0.982108	0.0704332	-13.9438	3.43063e-44	2.26063e-42
ADM	1170.66	-0.978578	0.117575	-8.32301	8.57558e-17	1.62915e-15
ITGB4	4763.81	-0.977571	0.0975533	-10.0209	1.23383e-23	3.5524e-22
DLL3	78.2227	-0.977177	0.330828	-2.95373	0.00313957	0.0107349
SNORA5C	61.5826	-0.977082	0.379475	-2.57483	0.010029	0.0294842
P2RY2	578.785	-0.975905	0.139212	-7.01023	2.37923e-12	3.13036e-11
RIOK1	500.77	-0.974853	0.142894	-6.8222	8.96592e-12	1.11536e-10
ZYX	935.961	-0.973776	0.120294	-8.09499	5.72686e-16	1.02959e-14
ANO1	970.808	-0.973552	0.136078	-7.15436	8.40664e-13	1.14629e-11
C11orf24	742.181	-0.971885	0.125479	-7.74537	9.53034e-15	1.55376e-13
MLKL	96.2026	-0.97161	0.293381	-3.31177	0.000927079	0.00361579
MFSD9	164.883	-0.970924	0.229864	-4.2239	2.40106e-05	0.000128839
SERTAD1	325.224	-0.970889	0.17935	-5.41338	6.1846e-08	4.87006e-07
SELO	130.583	-0.969982	0.270423	-3.58691	0.000334624	0.00143479
RHBDL2	124.657	-0.969448	0.261386	-3.70888	0.000208178	0.000931421
ARSI	788.619	-0.969056	0.124357	-7.79254	6.56742e-15	1.08418e-13
SEMA3B	336.866	-0.967675	0.173777	-5.5685	2.56949e-08	2.13545e-07
F2R	470.826	-0.967638	0.149138	-6.48821	8.686e-11	9.70872e-10
MAST4	223.797	-0.967525	0.208227	-4.64649	3.37623e-06	2.07948e-05
ZBTB24	501.043	-0.9671	0.14613	-6.61808	3.63904e-11	4.25652e-10
GSTM3	173.027	-0.96607	0.234099	-4.12677	3.67901e-05	0.000191097
PLAGL2	238.498	-0.965361	0.199955	-4.8279	1.37983e-06	8.99462e-06
ALPK1	294.349	-0.963796	0.183678	-5.24721	1.54421e-07	1.16029e-06
C14orf169	267.03	-0.963581	0.190394	-5.06098	4.17107e-07	2.94048e-06
MLLT4	1273.01	-0.963021	0.108356	-8.88757	6.24616e-19	1.32639e-17
ZNF761	479.624	-0.962909	0.151499	-6.35589	2.07223e-10	2.21558e-09
BYSL	340.903	-0.962008	0.166782	-5.76806	8.01904e-09	7.11905e-08
ADAMTSL5	125.962	-0.961936	0.258379	-3.72296	0.000196898	0.000884722
WDR83	45.3378	-0.961323	0.423009	-2.27258	0.0230515	0.0601155
YARS2	373.615	-0.961286	0.166579	-5.77075	7.89175e-09	7.01395e-08
TRPV3	136.647	-0.961032	0.254226	-3.78023	0.000156682	0.000720672
PIM2	182.3	-0.960801	0.261182	-3.67866	0.000234458	0.00103896
ZNF408	136.063	-0.959199	0.253635	-3.78181	0.000155695	0.000717388
MNT	90.8609	-0.95793	0.305236	-3.13833	0.00169913	0.00622605
GRPEL1	974.42	-0.957215	0.113957	-8.39979	4.47281e-17	8.63264e-16
ESRRA	873.599	-0.957153	0.134505	-7.1161	1.11025e-12	1.49575e-11
PSIMCT-1	86.1795	-0.956757	0.316222	-3.02559	0.0024815	0.00870016
TTC39B	79.8513	-0.956714	0.328725	-2.91038	0.0036099	0.0121246
FSCN1	8361.38	-0.956391	0.0942969	-10.1423	3.58441e-24	1.06111e-22
PDSS1	82.6823	-0.956017	0.317769	-3.00852	0.0026252	0.00914493
SERPINB9	95.2509	-0.955534	0.2963	-3.22488	0.00126024	0.0047596
F12	46.462	-0.954122	0.41986	-2.27248	0.0230577	0.0601218
C7orf41	361.416	-0.953855	0.168136	-5.67313	1.40216e-08	1.20014e-07
FASTKD3	947.756	-0.953282	0.116315	-8.19572	2.49089e-16	4.57748e-15
MOCS3	299.374	-0.953216	0.183565	-5.19281	2.07146e-07	1.52517e-06
DNPH1	189.324	-0.951977	0.222296	-4.28247	1.8483e-05	0.000101496
THSD1	143.463	-0.951555	0.243663	-3.90521	9.41424e-05	0.000452441
IL31RA	76.4597	-0.951429	0.345243	-2.75582	0.00585448	0.0184848
LRP1	957.153	-0.95107	0.275279	-3.45493	0.000550432	0.00226575
HIBCH	229.37	-0.948057	0.197711	-4.79516	1.62544e-06	1.04486e-05
MAD1L1	1477.01	-0.947818	0.105146	-9.01427	1.98181e-19	4.38364e-18
TOP1MT	390.714	-0.94632	0.160986	-5.87828	4.14562e-09	3.81586e-08
NCOA5	765.645	-0.945695	0.130419	-7.25123	4.12991e-13	5.80213e-12
ZFYVE21	260.925	-0.945452	0.18706	-5.05427	4.3203e-07	3.03888e-06
SLC25A32	1192.39	-0.945246	0.106202	-8.90046	5.56144e-19	1.19166e-17
NUP62CL	131.037	-0.945139	0.255634	-3.69724	0.000217956	0.000971032
DDX31	827.721	-0.944999	0.118893	-7.94831	1.89066e-15	3.2685e-14
CA2	632.574	-0.944965	0.136926	-6.90128	5.15374e-12	6.56154e-11
GSTO1	637.227	-0.944675	0.136111	-6.94048	3.90777e-12	5.03217e-11
UCK2	1132.57	-0.944483	0.111624	-8.46128	2.64465e-17	5.16117e-16
RBMXL1	535.549	-0.944171	0.141066	-6.69312	2.18458e-11	2.60842e-10
TMEM44	227.235	-0.944118	0.199712	-4.72739	2.27423e-06	1.4321e-05
CSNK1E	1122.85	-0.942819	0.107474	-8.77252	1.74718e-18	3.62534e-17
IL20RB	4079.56	-0.942815	0.0808371	-11.6632	1.96617e-31	8.10609e-30
ERCC1	514.319	-0.940472	0.155552	-6.04604	1.48453e-09	1.44587e-08
THBS1	22735.3	-0.940441	0.0717264	-13.1115	2.82936e-39	1.60286e-37
IGSF9	199.203	-0.940391	0.22393	-4.19949	2.67522e-05	0.000142386
SLC35E4	80.0033	-0.939263	0.329254	-2.85271	0.00433487	0.0142437
PLA2R1	422.44	-0.938349	0.154334	-6.07997	1.20202e-09	1.18527e-08
RAB7L1	402.748	-0.937734	0.154864	-6.05521	1.40237e-09	1.3684e-08
ZSCAN25	407.46	-0.937431	0.154598	-6.06366	1.33058e-09	1.30481e-08
SLC1A5	2375.45	-0.935577	0.0884741	-10.5746	3.90867e-26	1.27979e-24
MKI67IP	706.09	-0.934714	0.126518	-7.38802	1.49034e-13	2.1895e-12
ZNF551	374.232	-0.934697	0.166464	-5.615	1.96563e-08	1.65015e-07
SMG8	588.803	-0.934647	0.142769	-6.54657	5.88725e-11	6.74315e-10
DUOX1	107.07	-0.934346	0.288237	-3.24159	0.00118865	0.00451194
ZNF668	132.258	-0.933252	0.276186	-3.37907	0.000727321	0.00291021
RPIA	171.593	-0.932536	0.229919	-4.05593	4.99345e-05	0.000253438
TMTC4	170.962	-0.932114	0.225692	-4.13003	3.62711e-05	0.000188526
VIMP	412.241	-0.931833	0.155623	-5.98774	2.12773e-09	2.03954e-08
IMP3	614.312	-0.931344	0.136492	-6.82346	8.88745e-12	1.10735e-10
LOC100134229	83.4556	-0.930984	0.317014	-2.93673	0.0033169	0.0112547
STK38L	542.325	-0.930717	0.138456	-6.72212	1.79105e-11	2.16313e-10
SLC6A11	103.163	-0.929476	0.283795	-3.27517	0.00105597	0.00405227
GEMIN8	91.9191	-0.928792	0.302085	-3.07461	0.00210781	0.00753874
KHDC1L	47.6436	-0.928621	0.4135	-2.24576	0.0247195	0.0638628
SRSF2	3595.62	-0.928521	0.0898743	-10.3313	5.08468e-25	1.57635e-23
SLC38A5	1061.54	-0.928376	0.112771	-8.23238	1.83522e-16	3.41239e-15
HOMER1	302.978	-0.928052	0.177164	-5.23838	1.61996e-07	1.21258e-06
CREG1	978.157	-0.927899	0.121648	-7.62773	2.38928e-14	3.75163e-13
BTN3A1	236.872	-0.927882	0.204498	-4.53737	5.69606e-06	3.39415e-05
GRAMD2	127.019	-0.927625	0.283184	-3.27569	0.00105403	0.00404581
RPL18A	2505.35	-0.926743	0.104231	-8.89121	6.04476e-19	1.28647e-17
IGFBP6	4076.75	-0.926283	0.0917207	-10.099	5.58338e-24	1.64054e-22
SERPINI1	62.326	-0.92283	0.362358	-2.54673	0.0108737	0.0315668
SPATA5L1	140.338	-0.922775	0.2511	-3.67493	0.000237916	0.00105251
APBB2	506.366	-0.922534	0.144789	-6.37155	1.87125e-10	2.013e-09
PGBD2	110.951	-0.921823	0.275283	-3.34864	0.000812102	0.00320626
GRWD1	719.601	-0.92009	0.135532	-6.78873	1.13124e-11	1.38862e-10
AGPAT4	304.761	-0.919334	0.174258	-5.27569	1.32255e-07	1.0038e-06
TRIM4	275.026	-0.91862	0.190712	-4.81678	1.45893e-06	9.4438e-06
CST3	2036	-0.917312	0.103216	-8.88729	6.262e-19	1.32732e-17
LRRC8C	436.323	-0.917187	0.151904	-6.03793	1.56104e-09	1.51292e-08
SDC1	4793.42	-0.914097	0.0820697	-11.1381	8.18874e-29	3.03446e-27
APOBEC3C	137.227	-0.91381	0.247789	-3.68786	0.000226149	0.00100412
PPP1R3C	115.494	-0.913714	0.270186	-3.3818	0.000720126	0.00288435
LTB4R	326.765	-0.913528	0.16872	-5.41448	6.14675e-08	4.8451e-07
GSTP1	10023.3	-0.913319	0.084093	-10.8608	1.77151e-27	6.15882e-26
ADIPOR2	1708.31	-0.913306	0.0955286	-9.56055	1.17127e-21	2.98485e-20
UBE2E2	86.1227	-0.911841	0.319526	-2.85373	0.00432093	0.0142029
SNCG	306.695	-0.911489	0.186197	-4.89528	9.81656e-07	6.53704e-06
HSPA8	25448.7	-0.910056	0.0750522	-12.1256	7.72555e-34	3.45653e-32
TIMP3	2579.43	-0.91002	0.0898864	-10.1241	4.31922e-24	1.27624e-22
CDC42SE1	2649.09	-0.908324	0.0915885	-9.91745	3.49584e-23	9.77903e-22
ZNF561	455.226	-0.90829	0.150643	-6.02941	1.64564e-09	1.59001e-08
ZBTB9	185.233	-0.907346	0.217347	-4.17465	2.98449e-05	0.000157621
CLDND1	914.009	-0.907336	0.116555	-7.78463	6.99148e-15	1.14936e-13
ALG6	400.789	-0.906793	0.156652	-5.7886	7.09768e-09	6.35121e-08
RSL1D1	2694.05	-0.9064	0.0877824	-10.3255	5.40171e-25	1.67135e-23
PDCD11	860.674	-0.905581	0.118512	-7.64129	2.1506e-14	3.404e-13
MOCS2	360.958	-0.905397	0.162012	-5.58846	2.29095e-08	1.91204e-07
MGST2	149.61	-0.90369	0.23919	-3.77812	0.000158014	0.00072659
TMEM70	350.549	-0.902763	0.167874	-5.37763	7.5472e-08	5.8988e-07
IMPA2	622.752	-0.902286	0.138531	-6.51325	7.35439e-11	8.31474e-10
NRARP	55.1986	-0.901678	0.383422	-2.35166	0.01869	0.0502387
PTPN13	1838.56	-0.901479	0.0946957	-9.51974	1.7361e-21	4.38873e-20
GAL3ST4	70.6385	-0.901062	0.339229	-2.6562	0.00790257	0.0239618
SNORA24	61.101	-0.900575	0.365441	-2.46435	0.0137262	0.0385543
NDRG2	61.2939	-0.899246	0.370987	-2.42393	0.0153535	0.0425036
DDX28	236.214	-0.899152	0.195618	-4.59648	4.29697e-06	2.60081e-05
TOB2	351.336	-0.89872	0.171307	-5.24624	1.55233e-07	1.16528e-06
ZNF432	245.264	-0.898703	0.203757	-4.41067	1.03051e-05	5.91672e-05
SMTN	242.529	-0.898304	0.19197	-4.67941	2.87699e-06	1.78807e-05
LTA4H	997.829	-0.897873	0.114595	-7.83516	4.68244e-15	7.82013e-14
HMGCR	1354.8	-0.897831	0.104191	-8.61714	6.86457e-18	1.38425e-16
PRICKLE3	148.552	-0.897111	0.240017	-3.73771	0.000185708	0.000840917
MIR22HG	424.152	-0.896668	0.166097	-5.39847	6.72127e-08	5.27684e-07
SGMS2	1316.44	-0.896613	0.106813	-8.39425	4.68872e-17	9.03827e-16
LRRC23	43.5573	-0.896083	0.438038	-2.04567	0.0407886	0.0977151
ZNF28	728.694	-0.895655	0.128324	-6.97962	2.95984e-12	3.86843e-11
SGK1	837.054	-0.895177	0.118774	-7.5368	4.8165e-14	7.35742e-13
ALG11	65.5994	-0.894517	0.35412	-2.52603	0.011536	0.0331716
FAM174A	149.936	-0.893814	0.237788	-3.75887	0.000170683	0.000779157
PQLC3	87.5891	-0.892478	0.32246	-2.76771	0.00564509	0.0179315
MIDN	325.523	-0.891966	0.173275	-5.14769	2.63712e-07	1.9148e-06
ZSCAN22	120.029	-0.8919	0.263492	-3.38492	0.000711979	0.00285317
PIK3CD	155.641	-0.891057	0.235613	-3.78186	0.000155661	0.000717388
PRSS16	57.5356	-0.89062	0.378159	-2.35514	0.0185155	0.0498378
MBLAC2	57.7533	-0.890532	0.375075	-2.37427	0.0175835	0.0477206
BTN3A2	78.7905	-0.888064	0.321491	-2.76233	0.00573906	0.018197
CAMKK1	129.213	-0.886564	0.254574	-3.48253	0.000496694	0.00206233
ZNF574	263.466	-0.885987	0.189386	-4.67821	2.89385e-06	1.79784e-05
ZBTB48	191.449	-0.88526	0.219281	-4.0371	5.41152e-05	0.00027281
VIM	51.7994	-0.884461	0.394978	-2.23926	0.0251388	0.0647654
GPATCH3	340.534	-0.884276	0.165573	-5.3407	9.2589e-08	7.15147e-07
F2RL1	396.032	-0.884204	0.159156	-5.55558	2.76699e-08	2.29113e-07
ABCA2	586.464	-0.88373	0.136363	-6.48073	9.1282e-11	1.01669e-09
KLHL18	315.661	-0.883083	0.17201	-5.13389	2.83808e-07	2.04562e-06
ST3GAL3	159.569	-0.882955	0.236314	-3.73637	0.000186699	0.000843951
GALNT14	361.887	-0.882705	0.161858	-5.45358	4.93652e-08	3.93249e-07
ZNF845	474.376	-0.881448	0.146006	-6.03707	1.56938e-09	1.52006e-08
CTGF	810.862	-0.880446	0.123617	-7.12238	1.06083e-12	1.43284e-11
ZNF721	410.327	-0.879327	0.157638	-5.57813	2.43113e-08	2.02581e-07
ZNF142	285.85	-0.877952	0.191154	-4.59292	4.37094e-06	2.64354e-05
PDCD4	399.236	-0.877857	0.161199	-5.44578	5.15786e-08	4.10465e-07
SHPK	119.454	-0.877018	0.265687	-3.30094	0.000963609	0.00374343
RNF126	222.394	-0.876956	0.209941	-4.17715	2.95182e-05	0.000156001
ZHX2	195.239	-0.876894	0.234639	-3.7372	0.00018608	0.000841875
PPP1R12B	440.166	-0.876527	0.155627	-5.63224	1.77885e-08	1.50134e-07
ZNF324	252.056	-0.876462	0.191345	-4.58052	4.63816e-06	2.7955e-05
ALAS1	693.956	-0.876174	0.129725	-6.75407	1.4375e-11	1.75498e-10
KRTCAP3	155.986	-0.875315	0.23347	-3.74915	0.000177433	0.000806929
CNNM4	452.919	-0.874593	0.14844	-5.89189	3.81804e-09	3.52671e-08
CAPRIN2	616.013	-0.872255	0.137266	-6.35448	2.09129e-10	2.23444e-09
ELOVL1	1157.19	-0.871549	0.106657	-8.17152	3.04529e-16	5.57677e-15
MMAB	393.884	-0.870647	0.159065	-5.47354	4.41136e-08	3.5392e-07
EPHA2	5729.49	-0.870128	0.0790422	-11.0084	3.48147e-28	1.2433e-26
DTX4	623.309	-0.869929	0.140294	-6.20075	5.61965e-10	5.70853e-09
TAF4B	238.922	-0.868748	0.203279	-4.27368	1.92273e-05	0.000105313
ETFB	426.145	-0.868525	0.151343	-5.73879	9.53562e-09	8.38039e-08
GTPBP4	1376.56	-0.867974	0.103034	-8.42413	3.63439e-17	7.03169e-16
PGM2	861.655	-0.86686	0.117618	-7.37012	1.70473e-13	2.49283e-12
TRAK1	381.214	-0.866692	0.165149	-5.24794	1.53808e-07	1.1568e-06
HSP90B1	19795.4	-0.865555	0.0730912	-11.8421	2.36383e-32	1.01439e-30
EFCAB11	92.6548	-0.865371	0.305961	-2.82837	0.0046786	0.0151799
AMD1	2498.65	-0.862995	0.0945962	-9.12294	7.31154e-20	1.67368e-18
CAV2	7438.35	-0.862719	0.0771952	-11.1758	5.35595e-29	1.99884e-27
NUDT19	561.471	-0.86006	0.135974	-6.32517	2.52955e-10	2.6701e-09
ERO1LB	117.702	-0.85918	0.277922	-3.09144	0.00199186	0.00718111
C1RL	293.794	-0.859133	0.180642	-4.756	1.9747e-06	1.25351e-05
EXOC8	895.516	-0.858994	0.117175	-7.33085	2.28697e-13	3.31653e-12
LOC100289019	100.297	-0.858651	0.289562	-2.96535	0.00302341	0.0103874
WDR82	1389.93	-0.858547	0.103323	-8.30931	9.62569e-17	1.81987e-15
C8orf58	111.676	-0.858383	0.272608	-3.14879	0.0016395	0.00602579
PTGS2	1391.7	-0.858118	0.118489	-7.24216	4.41602e-13	6.18753e-12
RHBDF2	105.09	-0.857792	0.282357	-3.03797	0.00238179	0.00839169
NOP56	3917.41	-0.857271	0.085399	-10.0384	1.03319e-23	2.98017e-22
FAM53C	507.7	-0.857045	0.144951	-5.91264	3.36667e-09	3.13738e-08
ALG2	894.871	-0.856641	0.122773	-6.97741	3.00677e-12	3.92228e-11
HMG20B	572.38	-0.854782	0.155136	-5.50988	3.59083e-08	2.92258e-07
COL4A5	1062.59	-0.854652	0.111979	-7.63224	2.30713e-14	3.64078e-13
ZNF17	173.504	-0.854557	0.224281	-3.8102	0.000138855	0.000647951
RBM3	1756.59	-0.85271	0.0986973	-8.63965	5.63836e-18	1.14284e-16
CLP1	422.928	-0.852561	0.159294	-5.35214	8.6922e-08	6.74684e-07
SDE2	1029.98	-0.852408	0.115111	-7.40507	1.3108e-13	1.93838e-12
NSMCE1	428.073	-0.852388	0.152821	-5.57769	2.43735e-08	2.02993e-07
PRR3	177.959	-0.85228	0.224924	-3.78919	0.000151139	0.000699262
FKBP11	147.527	-0.852101	0.241557	-3.52753	0.000419453	0.00176819
LINC00467	50.4953	-0.85064	0.402942	-2.11108	0.0347659	0.0852846
TMEM18	224.67	-0.850419	0.214489	-3.96486	7.34388e-05	0.000360267
MCTP1	75.0987	-0.849196	0.32787	-2.59004	0.00959652	0.0283823
TMBIM1	2752.61	-0.84909	0.0951373	-8.92489	4.46134e-19	9.62489e-18
ZNF644	2319.71	-0.848111	0.109662	-7.73386	1.04334e-14	1.69398e-13
MROH6	871.756	-0.84678	0.135409	-6.25348	4.014e-10	4.15351e-09
CALD1	2918.24	-0.846417	0.087434	-9.68064	3.64433e-22	9.54984e-21
NDUFC1	358.917	-0.846362	0.162765	-5.19991	1.99385e-07	1.47147e-06
C5orf30	126.215	-0.844752	0.256819	-3.28929	0.0010044	0.00388273
BTD	141.754	-0.843664	0.249946	-3.37538	0.000737133	0.00294125
KLHL36	228.293	-0.843535	0.206736	-4.08026	4.49856e-05	0.00022982
PRPF38B	778.038	-0.842647	0.12477	-6.75358	1.44243e-11	1.75963e-10
N6AMT2	74.0285	-0.841862	0.330724	-2.54551	0.0109117	0.0316712
SLC48A1	540.774	-0.841774	0.151175	-5.56823	2.57342e-08	2.13759e-07
SCARNA2	2106.55	-0.841606	0.36062	-2.33378	0.0196074	0.0523473
TNFRSF10A	179.666	-0.840223	0.218604	-3.84358	0.000121255	0.000572064
ERVMER34-1	843.666	-0.840131	0.120701	-6.96045	3.39178e-12	4.38924e-11
CDH13	1134.25	-0.840126	0.107874	-7.78804	6.80566e-15	1.12099e-13
PUS3	151.614	-0.839752	0.24128	-3.4804	0.000500659	0.00207606
CAPG	1155.97	-0.839054	0.115389	-7.27153	3.55434e-13	5.03152e-12
TMC6	313.011	-0.837262	0.171208	-4.89033	1.00669e-06	6.69526e-06
PARS2	175.407	-0.836336	0.221609	-3.77392	0.000160705	0.000737452
ZNF239	92.064	-0.83591	0.302708	-2.76144	0.00575473	0.0182393
RELT	466.482	-0.835563	0.146225	-5.71422	1.1021e-08	9.59476e-08
SLC18B1	86.7701	-0.834455	0.326619	-2.55482	0.0106242	0.0309623
DDR1	3432.44	-0.833921	0.0843488	-9.88657	4.76061e-23	1.32231e-21
NDUFA1	790.553	-0.833104	0.13195	-6.31381	2.72257e-10	2.86042e-09
FBXO46	156.321	-0.832865	0.237126	-3.51233	0.0004442	0.00186453
SIRT5	233.026	-0.832719	0.198971	-4.18513	2.85002e-05	0.000151128
LSM11	60.6373	-0.832683	0.384928	-2.16322	0.0305244	0.0764274
BRIX1	2683.84	-0.830311	0.0861506	-9.6379	5.53085e-22	1.43501e-20
FBRSL1	232.875	-0.829284	0.202239	-4.10052	4.12217e-05	0.000212088
PTGR2	137.005	-0.82876	0.24689	-3.3568	0.000788493	0.00312323
RPUSD4	464.799	-0.828042	0.146098	-5.66773	1.44698e-08	1.23515e-07
JHDM1D	366.817	-0.827389	0.161829	-5.11274	3.17512e-07	2.27813e-06
KIF16B	961.037	-0.827132	0.117536	-7.03726	1.96055e-12	2.5925e-11
RPL37A	6548.41	-0.826189	0.0942351	-8.76732	1.82971e-18	3.7866e-17
POLR3GL	124.8	-0.825969	0.257933	-3.20226	0.00136356	0.00511058
HSPB1	2143.94	-0.825491	0.091615	-9.01044	2.05234e-19	4.52694e-18
ASNS	563.862	-0.825475	0.144337	-5.71907	1.07112e-08	9.34571e-08
SCARA3	314.172	-0.825331	0.175815	-4.69431	2.67508e-06	1.66785e-05
PMPCA	938.298	-0.825069	0.117793	-7.0044	2.48054e-12	3.2555e-11
RPS28	1072.01	-0.824663	0.122708	-6.72055	1.81045e-11	2.18489e-10
FEM1A	794.517	-0.823899	0.125126	-6.58456	4.56246e-11	5.28728e-10
POLR1E	559.961	-0.823193	0.139699	-5.8926	3.80155e-09	3.51353e-08
TRIM21	153.708	-0.822898	0.235704	-3.49124	0.00048079	0.00200494
ZNF57	104.835	-0.822057	0.283569	-2.89897	0.00374396	0.0125082
MRPS2	664.455	-0.821975	0.12739	-6.45245	1.10059e-10	1.21637e-09
KIAA1609	2230.31	-0.821331	0.0904956	-9.07592	1.1272e-19	2.54695e-18
PLEKHO2	159.444	-0.82128	0.233804	-3.51269	0.000443594	0.00186347
WNT9A	177.904	-0.819611	0.230194	-3.56052	0.000370124	0.00157585
PTPN3	1176.37	-0.81822	0.112396	-7.27979	3.34344e-13	4.75233e-12
ANKH	1197.76	-0.817703	0.11229	-7.28208	3.28708e-13	4.67644e-12
SLC37A4	297.732	-0.817526	0.175001	-4.67156	2.98927e-06	1.85346e-05
ADORA2B	1262.89	-0.817146	0.104925	-7.78793	6.8118e-15	1.12099e-13
SH2D5	559.864	-0.81644	0.135434	-6.02833	1.65659e-09	1.59961e-08
TFB2M	381.475	-0.815677	0.157988	-5.1629	2.43152e-07	1.77451e-06
GALNT11	493.419	-0.815516	0.147669	-5.5226	3.3401e-08	2.72697e-07
FOXD1	102.594	-0.815144	0.283441	-2.87588	0.004029	0.0133669
SLC7A1	2548.71	-0.814631	0.111336	-7.31684	2.53875e-13	3.66143e-12
LMBRD1	338.365	-0.814272	0.172107	-4.73118	2.23213e-06	1.40784e-05
BCAR1	1679.22	-0.813888	0.114609	-7.10143	1.23469e-12	1.65772e-11
ATP2A2	3367.18	-0.813673	0.115022	-7.07406	1.50468e-12	2.00994e-11
ZNRF3	210.837	-0.812595	0.204998	-3.96392	7.37289e-05	0.000361281
IFITM3	987.788	-0.812412	0.118015	-6.88394	5.82184e-12	7.37636e-11
KLHL42	810.048	-0.811918	0.121826	-6.66456	2.65455e-11	3.15283e-10
TBC1D30	81.6757	-0.811662	0.319187	-2.5429	0.0109937	0.0318799
RPF2	498.951	-0.811586	0.146595	-5.53626	3.08999e-08	2.53724e-07
COQ10A	107.309	-0.811156	0.28948	-2.80211	0.00507689	0.0163209
SEL1L3	403.228	-0.810958	0.15483	-5.23774	1.62555e-07	1.21619e-06
ARL4C	1902.84	-0.810707	0.0949077	-8.54206	1.3185e-17	2.61855e-16
ANKRD16	60.5882	-0.810066	0.377675	-2.14488	0.0319628	0.0794478
UMPS	1006.42	-0.809901	0.110685	-7.31719	2.53214e-13	3.65708e-12
STK40	463.261	-0.809478	0.146613	-5.5212	3.36686e-08	2.74739e-07
ATG4B	552.26	-0.809236	0.147862	-5.47291	4.42704e-08	3.54816e-07
RPL36A	262.211	-0.809198	0.192621	-4.20099	2.65752e-05	0.000141588
HRH1	308.322	-0.809111	0.184916	-4.37557	1.21115e-05	6.85885e-05
LCMT2	264.519	-0.808729	0.190085	-4.25456	2.09458e-05	0.000113868
SMCR7L	578.128	-0.8083	0.136771	-5.90986	3.42408e-09	3.18523e-08
SOD2	858.257	-0.808258	0.127032	-6.36261	1.98351e-10	2.12651e-09
ATP2B4	1560.1	-0.808154	0.115363	-7.00534	2.46394e-12	3.23641e-11
PTRH2	234.165	-0.807868	0.195149	-4.13975	3.47677e-05	0.000181491
DIXDC1	51.9718	-0.807189	0.39362	-2.05068	0.0402983	0.096732
MIR205HG	2427.66	-0.807015	0.0890337	-9.06415	1.25577e-19	2.81726e-18
ZNF785	79.5968	-0.806517	0.329554	-2.4473	0.0143933	0.0401345
SFPQ	4888.6	-0.80618	0.0805739	-10.0055	1.44212e-23	4.12944e-22
RRP7B	64.2115	-0.805385	0.361725	-2.22651	0.02598	0.0666491
MYD88	230.441	-0.80347	0.234319	-3.42896	0.000605888	0.00246121
NCBP2	1612.24	-0.803468	0.097657	-8.22745	1.91239e-16	3.5475e-15
FLVCR1	263.583	-0.802903	0.185477	-4.32885	1.49892e-05	8.36219e-05
MANEA	534.332	-0.802807	0.163254	-4.91752	8.76463e-07	5.88883e-06
APBB3	59.1376	-0.802672	0.374442	-2.14365	0.0320609	0.0795912
ACOT13	460.732	-0.802267	0.161199	-4.97687	6.46214e-07	4.4268e-06
ZNF200	292.924	-0.800457	0.176174	-4.54357	5.53107e-06	3.30208e-05
LOC100506305	481.561	-0.800292	0.146477	-5.4636	4.66569e-08	3.72995e-07
FAM217B	441.424	-0.800119	0.150717	-5.30876	1.10372e-07	8.46274e-07
HIST1H2AJ	841.995	-0.79982	0.14629	-5.46735	4.56819e-08	3.65757e-07
ZNF697	55.7689	-0.799644	0.384383	-2.08033	0.0374954	0.0910026
AMMECR1L	638.496	-0.799622	0.131559	-6.07804	1.21658e-09	1.19824e-08
FAM83A	1770.45	-0.799125	0.0989094	-8.07937	6.51029e-16	1.16777e-14
INPPL1	1945.35	-0.797706	0.0964852	-8.26765	1.36622e-16	2.56761e-15
AMPD3	136.062	-0.797054	0.250733	-3.1789	0.00147836	0.0054938
SMO	157.55	-0.797033	0.231446	-3.44371	0.000573797	0.00235274
ZNF749	195.749	-0.796971	0.216457	-3.68189	0.00023151	0.00102677
AAR2	697.643	-0.796749	0.125429	-6.35222	2.12236e-10	2.26611e-09
PTPRE	232.157	-0.796735	0.194723	-4.09163	4.28356e-05	0.000219531
VSNL1	74.1222	-0.796696	0.335305	-2.37603	0.0175	0.047543
RRAS	446.127	-0.79631	0.148624	-5.35788	8.42021e-08	6.5454e-07
SURF6	788.75	-0.795403	0.129395	-6.14709	7.8919e-10	7.89641e-09
PLEKHF1	211.659	-0.795157	0.216041	-3.68059	0.000232698	0.00103173
IGSF8	323.198	-0.795096	0.170659	-4.65899	3.17767e-06	1.96333e-05
TRMT10C	335.433	-0.795049	0.165904	-4.79223	1.64935e-06	1.05893e-05
HSDL1	344.108	-0.795004	0.164986	-4.81861	1.44565e-06	9.36553e-06
YRDC	565.919	-0.795003	0.144794	-5.4906	4.00577e-08	3.23781e-07
ERRFI1	465.302	-0.794574	0.171837	-4.62401	3.76397e-06	2.29496e-05
ZNF587B	230.905	-0.79428	0.196205	-4.04821	5.16109e-05	0.000261021
ARPC2	6061.22	-0.79389	0.0797642	-9.95296	2.44791e-23	6.93385e-22
LSM7	255.217	-0.79353	0.193948	-4.09146	4.28659e-05	0.000219614
METTL2A	245.622	-0.793524	0.203128	-3.90652	9.36341e-05	0.000450135
RRAD	1306.06	-0.793307	0.126093	-6.29147	3.14483e-10	3.27999e-09
VCL	3687.02	-0.793193	0.0827725	-9.58282	9.44328e-22	2.41825e-20
BRD9	1418.35	-0.792934	0.10261	-7.72766	1.09542e-14	1.77304e-13
FAM108C1	585.248	-0.792667	0.134075	-5.91212	3.37732e-09	3.14544e-08
LSS	833.208	-0.791908	0.12863	-6.15649	7.4377e-10	7.47043e-09
HORMAD1	102.862	-0.791874	0.284455	-2.78382	0.00537223	0.0171513
MTHFD2	3356.79	-0.790808	0.0949924	-8.32496	8.43599e-17	1.60846e-15
PDLIM7	280.915	-0.79022	0.186245	-4.24291	2.20642e-05	0.000119339
CCDC167	119.794	-0.789285	0.262722	-3.00427	0.00266223	0.00925552
LY6E	1819.4	-0.787144	0.102671	-7.66665	1.76548e-14	2.81138e-13
SORCS2	249.335	-0.786385	0.200555	-3.92105	8.8163e-05	0.000425522
PWP2	579.101	-0.786141	0.134745	-5.83426	5.40287e-09	4.89022e-08
TMEM184A	688.576	-0.785933	0.126107	-6.23229	4.59657e-10	4.73456e-09
RALGDS	952.952	-0.785603	0.113483	-6.92266	4.43226e-12	5.67049e-11
SH3RF2	143.874	-0.785331	0.244419	-3.21305	0.00131334	0.00494709
COA6	431.545	-0.784675	0.173908	-4.51201	6.42165e-06	3.81352e-05
RELL1	780.61	-0.78404	0.121548	-6.45044	1.11527e-10	1.23086e-09
ALG5	227.255	-0.783995	0.197134	-3.97697	6.97996e-05	0.000344169
RRP12	425.841	-0.782935	0.15364	-5.0959	3.47091e-07	2.46898e-06
MYADM	991.881	-0.782831	0.111992	-6.99004	2.74812e-12	3.59769e-11
SPATA2L	68.3228	-0.782756	0.347853	-2.25025	0.024433	0.0632054
NCR3LG1	256.792	-0.782451	0.189315	-4.13306	3.57966e-05	0.000186483
COG2	449.884	-0.780397	0.154057	-5.06564	4.0704e-07	2.87336e-06
GSK3B	1747.36	-0.780085	0.100615	-7.75313	8.96542e-15	1.46317e-13
ABCB6	431.551	-0.780029	0.15748	-4.95319	7.30081e-07	4.96462e-06
RPS29	1999.51	-0.778902	0.106118	-7.33993	2.13702e-13	3.10192e-12
ZNF283	176.996	-0.778774	0.229164	-3.39832	0.000678011	0.00273025
DDX20	233.044	-0.777719	0.202563	-3.8394	0.000123337	0.000581044
DIDO1	2310.19	-0.777692	0.0911045	-8.53626	1.38635e-17	2.74292e-16
PROM2	2516.25	-0.776949	0.0876148	-8.86778	7.46181e-19	1.57528e-17
SLC2A1	6728.09	-0.776897	0.0867872	-8.95175	3.49895e-19	7.61119e-18
ERICH1	105.158	-0.776506	0.279009	-2.78309	0.00538446	0.0171833
GTPBP5	374.714	-0.775658	0.161172	-4.81262	1.48966e-06	9.62178e-06
DSG3	1911.65	-0.775061	0.0973565	-7.96106	1.70574e-15	2.9553e-14
MAK16	508.987	-0.773506	0.142157	-5.44119	5.29252e-08	4.20332e-07
IFITM2	372.115	-0.773332	0.163041	-4.74317	2.10405e-06	1.33239e-05
PBDC1	334.306	-0.773127	0.183437	-4.21467	2.50146e-05	0.000133998
HMOX2	893.278	-0.773026	0.118357	-6.53129	6.5207e-11	7.44164e-10
TPST2	166.32	-0.772908	0.243113	-3.17921	0.00147677	0.00548919
MYBBP1A	361.043	-0.772898	0.161778	-4.77751	1.77477e-06	1.13299e-05
VILL	118.447	-0.772029	0.26853	-2.87502	0.00404004	0.0134007
TMEM206	416.816	-0.77199	0.152969	-5.04671	4.49486e-07	3.1476e-06
QTRTD1	879.461	-0.77139	0.121754	-6.33564	2.36359e-10	2.50331e-09
UTP15	475.583	-0.771021	0.151157	-5.1008	3.38225e-07	2.41465e-06
RDH11	861.472	-0.770561	0.124112	-6.20862	5.34517e-10	5.45922e-09
FZD6	2517.81	-0.770345	0.0941572	-8.18147	2.80393e-16	5.14674e-15
DLGAP4	375.523	-0.770221	0.158277	-4.86628	1.13719e-06	7.51243e-06
IRX2	598.852	-0.770196	0.141152	-5.45651	4.85572e-08	3.874e-07
RAB18	998.993	-0.770116	0.116285	-6.62268	3.52736e-11	4.13644e-10
OAT	1114.7	-0.769013	0.116018	-6.62839	3.39375e-11	3.98569e-10
ZNF22	400.606	-0.768263	0.158749	-4.83949	1.30172e-06	8.51009e-06
IL1RL2	165.452	-0.767918	0.230687	-3.32883	0.000872108	0.00342088
BCS1L	250.689	-0.767829	0.195306	-3.93142	8.4447e-05	0.000408714
PIGP	245.506	-0.767582	0.190382	-4.03181	5.53494e-05	0.000278497
HDAC5	348.085	-0.7671	0.173845	-4.41256	1.02157e-05	5.86963e-05
CRK	1340.94	-0.766749	0.106787	-7.18014	6.96405e-13	9.60393e-12
RPS21	3071.48	-0.766572	0.0930155	-8.24134	1.70299e-16	3.18155e-15
TMEM120B	274.614	-0.766507	0.181273	-4.22846	2.35297e-05	0.000126561
STON2	1307.78	-0.76597	0.116971	-6.5484	5.81571e-11	6.66606e-10
TSR1	819.984	-0.76585	0.120446	-6.35842	2.03833e-10	2.18379e-09
NISCH	378.975	-0.765073	0.158715	-4.82043	1.43248e-06	9.28782e-06
KRR1	907.349	-0.764711	0.114213	-6.6955	2.14931e-11	2.5702e-10
SLC6A6	390.489	-0.764116	0.156067	-4.89607	9.77713e-07	6.51354e-06
PDE7A	724.186	-0.763964	0.124546	-6.13401	8.56916e-10	8.5415e-09
PODXL2	900.692	-0.763312	0.118691	-6.43106	1.26717e-10	1.38684e-09
SOCS3	403.408	-0.76331	0.159319	-4.79109	1.65879e-06	1.06456e-05
MAP3K9	675.58	-0.761524	0.127661	-5.96519	2.44343e-09	2.31957e-08
F11R	3980.11	-0.761438	0.0839632	-9.06872	1.20427e-19	2.71719e-18
DNTTIP2	2366.87	-0.761428	0.0882801	-8.62514	6.40117e-18	1.29246e-16
SCRN2	138.524	-0.760378	0.252286	-3.01395	0.00257868	0.0090028
HSPA5	9753.51	-0.758968	0.243942	-3.11126	0.00186292	0.00676639
KCTD12	1263.17	-0.758843	0.110893	-6.84304	7.75274e-12	9.70032e-11
ACTR5	224.853	-0.75868	0.198894	-3.8145	0.000136459	0.000637713
PLCB3	2449.51	-0.758339	0.0922399	-8.22138	2.01173e-16	3.71427e-15
AKR1E2	151.416	-0.758052	0.235514	-3.21872	0.00128766	0.00485617
ZNF259	1198.81	-0.757828	0.112036	-6.76413	1.3411e-11	1.64238e-10
IBA57	277.675	-0.757759	0.180349	-4.20163	2.64999e-05	0.00014133
PITPNC1	67.586	-0.757699	0.343612	-2.2051	0.0274472	0.0697765
EBP	1201.44	-0.75728	0.118499	-6.39062	1.65217e-10	1.7822e-09
RPS4Y1	839.307	-0.757104	0.117748	-6.42988	1.27704e-10	1.39632e-09
MYO9A	3820.97	-0.755855	0.0826321	-9.14723	5.84103e-20	1.34292e-18
CYP51A1	1624.87	-0.753005	0.109005	-6.90799	4.91565e-12	6.26854e-11
GRAMD1C	75.9266	-0.752766	0.328125	-2.29415	0.0217821	0.0573112
RPS2	11547.2	-0.75235	0.0816787	-9.21109	3.22827e-20	7.55453e-19
SLC38A6	200.063	-0.751603	0.211505	-3.5536	0.00038	0.00161528
IMPA1	280.68	-0.751351	0.181443	-4.14098	3.45819e-05	0.00018064
PTK6	467.515	-0.750876	0.150979	-4.97338	6.5797e-07	4.50342e-06
GLS2	124.142	-0.750297	0.27486	-2.72974	0.00633834	0.0197708
SS18L1	629.229	-0.750147	0.131895	-5.68744	1.28961e-08	1.10803e-07
TPM4	8904.99	-0.750091	0.0734313	-10.2149	1.70109e-24	5.08357e-23
CAMTA1	275.821	-0.749956	0.181142	-4.14016	3.47057e-05	0.000181227
PC	248.964	-0.749869	0.190789	-3.93035	8.48229e-05	0.000410407
GEMIN4	432.088	-0.748563	0.154998	-4.8295	1.36875e-06	8.92609e-06
ATG4D	103.708	-0.748074	0.282415	-2.64885	0.00807657	0.0244423
HSPA2	1811.86	-0.747936	0.0938388	-7.97043	1.58118e-15	2.74554e-14
NCS1	2909.31	-0.747454	0.08993	-8.31152	9.44866e-17	1.78855e-15
ZNF696	193.767	-0.746964	0.213706	-3.49529	0.000473553	0.00197809
PDLIM1	2374.33	-0.746863	0.0925876	-8.06655	7.23106e-16	1.29118e-14
MST4	957.536	-0.746721	0.123278	-6.05719	1.38521e-09	1.35333e-08
PPFIBP1	1277.93	-0.746474	0.107372	-6.95221	3.59612e-12	4.64223e-11
ISG20L2	416.811	-0.745574	0.156218	-4.77264	1.81825e-06	1.15887e-05
FOSL1	1094.2	-0.745564	0.111411	-6.69204	2.20075e-11	2.62573e-10
TBC1D7	237.204	-0.745209	0.195154	-3.81857	0.000134228	0.000627659
C1orf109	404.794	-0.744949	0.156341	-4.76491	1.88938e-06	1.20372e-05
FAM211A	169.922	-0.744731	0.223525	-3.33175	0.000863004	0.00338854
RRP1	522.367	-0.744219	0.14488	-5.13679	2.79465e-07	2.01895e-06
GPR125	913.767	-0.74397	0.117886	-6.31093	2.77364e-10	2.91214e-09
RHOBTB2	326.754	-0.743756	0.18597	-3.99934	6.35186e-05	0.000315769
DNMBP	174.028	-0.743733	0.229394	-3.24217	0.00118624	0.00450498
PPAPDC1B	232.103	-0.743015	0.211976	-3.50518	0.000456298	0.00191276
MMP28	527.39	-0.742685	0.150988	-4.91885	8.70542e-07	5.85654e-06
STK24	5118.75	-0.742506	0.0816644	-9.09216	9.70896e-20	2.20326e-18
LPCAT3	521.257	-0.741886	0.144425	-5.13683	2.79418e-07	2.01895e-06
RNF139	947.07	-0.74153	0.114499	-6.47632	9.39857e-11	1.04459e-09
TUBB2A	178.421	-0.741392	0.219924	-3.37112	0.000748627	0.00298031
FAM110C	166.671	-0.739829	0.234148	-3.15966	0.00157953	0.00583806
AGTRAP	482.514	-0.739445	0.174749	-4.23147	2.32167e-05	0.000125005
SLC3A2	10467.5	-0.739428	0.0759022	-9.74185	1.99879e-22	5.35356e-21
UQCRC2	1482.32	-0.73899	0.10141	-7.28715	3.16575e-13	4.52837e-12
S100A11	3854.98	-0.738894	0.0973876	-7.58715	3.27025e-14	5.05925e-13
TTLL7	425.21	-0.738665	0.151124	-4.88781	1.01965e-06	6.77571e-06
N4BP3	77.1638	-0.738097	0.323164	-2.28397	0.0223735	0.0586095
CFH	1279.49	-0.737909	0.115455	-6.39133	1.64453e-10	1.77638e-09
ALS2CL	1031.65	-0.737896	0.109655	-6.72924	1.7055e-11	2.06615e-10
PDGFB	297.304	-0.737736	0.18024	-4.09307	4.25698e-05	0.00021831
GPN2	369.43	-0.737732	0.169604	-4.34973	1.36307e-05	7.66367e-05
TYSND1	293.739	-0.737719	0.175253	-4.20945	2.55989e-05	0.000136803
IFT43	170.154	-0.737298	0.230058	-3.20484	0.0013514	0.00507142
PDCD6	4133.51	-0.736677	0.0913506	-8.06428	7.36676e-16	1.31392e-14
TP53TG1	172.987	-0.736401	0.230063	-3.20086	0.00137016	0.00513044
PLEC	14772	-0.73578	0.0720101	-10.2177	1.6517e-24	4.94535e-23
CPNE8	324.2	-0.735657	0.175129	-4.20067	2.66126e-05	0.000141739
DIMT1	346.699	-0.735142	0.164176	-4.47777	7.54255e-06	4.43403e-05
SULT1A1	103.097	-0.73472	0.289773	-2.5355	0.0112286	0.0323951
MED17	683.941	-0.734565	0.127647	-5.75465	8.68235e-09	7.67761e-08
ZNF77	67.2345	-0.734264	0.353442	-2.07747	0.0377584	0.0915279
SBNO2	1093.71	-0.733913	0.110839	-6.62145	3.55681e-11	4.16477e-10
AKR1A1	726.875	-0.733864	0.132296	-5.54713	2.90404e-08	2.39711e-07
TMEM39A	977.18	-0.733778	0.117114	-6.26552	3.71581e-10	3.85509e-09
ARAP1	858.13	-0.733263	0.116326	-6.30352	2.90953e-10	3.04669e-09
CDADC1	79.0632	-0.733226	0.321841	-2.27822	0.0227133	0.0593416
DCAF4	296.826	-0.732361	0.181144	-4.04299	5.27746e-05	0.000266479
UVSSA	246.99	-0.731971	0.192247	-3.80745	0.00014041	0.000654429
ZNF354B	92.1597	-0.730433	0.298094	-2.45034	0.0142721	0.0398318
IL18	464.806	-0.730338	0.149005	-4.90143	9.51422e-07	6.34913e-06
CCDC12	160.624	-0.730036	0.245676	-2.97154	0.00296308	0.0101934
PHF14	1081.93	-0.72966	0.110443	-6.60667	3.93057e-11	4.58877e-10
TM2D1	385.709	-0.729504	0.157513	-4.63138	3.63231e-06	2.22415e-05
TAGLN	2257.97	-0.72917	0.220946	-3.30022	0.000966089	0.00375122
NFKBIA	1094.16	-0.72882	0.116885	-6.23537	4.50709e-10	4.64848e-09
TIGD5	297.914	-0.727098	0.194054	-3.74688	0.000179049	0.000814043
BRMS1	1274.91	-0.726954	0.112905	-6.43863	1.20556e-10	1.32586e-09
NUDT8	144.862	-0.726482	0.24096	-3.01495	0.00257018	0.0089831
ACVR1C	92.0999	-0.726479	0.303296	-2.39528	0.0166076	0.0454479
KIAA1804	415.216	-0.725817	0.153164	-4.73883	2.14957e-06	1.35958e-05
C6orf141	238.119	-0.724321	0.214396	-3.37842	0.000729037	0.0029162
C2orf43	156.686	-0.72392	0.236255	-3.06414	0.00218298	0.00777471
NFATC1	70.6475	-0.723767	0.337428	-2.14495	0.0319569	0.0794457
ZNF581	186.235	-0.7233	0.215137	-3.36204	0.000773687	0.00307232
PANX1	1231.53	-0.722982	0.103774	-6.96689	3.24026e-12	4.20007e-11
RPUSD2	146.194	-0.722937	0.241359	-2.99527	0.00274199	0.00950133
HIST1H2AH	1727.69	-0.722779	0.124845	-5.78943	7.0625e-09	6.32333e-08
PRDX1	9699.6	-0.722628	0.0789926	-9.14805	5.79705e-20	1.33476e-18
UTP23	589.21	-0.721413	0.13335	-5.4099	6.30594e-08	4.95818e-07
CD83	223.136	-0.721005	0.199971	-3.60555	0.00031149	0.00134323
SH3YL1	84.7665	-0.720852	0.308952	-2.33322	0.0196367	0.0524077
DUSP22	119.812	-0.720469	0.262389	-2.7458	0.00603629	0.0189638
TRIM16	4583.53	-0.720241	0.0868789	-8.29017	1.13085e-16	2.13547e-15
ENDOD1	582.176	-0.720026	0.136191	-5.28688	1.2442e-07	9.49366e-07
MB21D1	623.521	-0.719951	0.137577	-5.2331	1.66694e-07	1.2442e-06
DLST	1054.69	-0.719908	0.109879	-6.55181	5.68438e-11	6.52027e-10
MFAP2	115.306	-0.719756	0.295263	-2.43768	0.0147818	0.0411013
FTSJ1	1476.68	-0.718588	0.102987	-6.97744	3.00607e-12	3.92228e-11
LDB1	291.411	-0.71832	0.177155	-4.05475	5.01886e-05	0.000254646
RBAK	1290.29	-0.718192	0.116165	-6.18252	6.30867e-10	6.36484e-09
SNX29	276.168	-0.717836	0.17992	-3.98975	6.61435e-05	0.000327474
KLF4	661.579	-0.717414	0.151652	-4.73066	2.23796e-06	1.40982e-05
HK2	1341.69	-0.717384	0.109475	-6.55297	5.64045e-11	6.47459e-10
ZNF622	1213.84	-0.717112	0.107054	-6.69863	2.10388e-11	2.52161e-10
NDEL1	576.428	-0.716839	0.134456	-5.33139	9.74649e-08	7.50966e-07
ZNF549	100.38	-0.715908	0.284196	-2.51906	0.0117667	0.0337653
ZFYVE27	263.644	-0.715409	0.184317	-3.88141	0.000103852	0.000494878
FASN	1829.73	-0.715358	0.102184	-7.00067	2.54733e-12	3.34037e-11
PFKFB3	1377.21	-0.715052	0.10416	-6.86491	6.65319e-12	8.3691e-11
BTN3A3	151.6	-0.714773	0.244025	-2.9291	0.00339949	0.0114914
SPRTN	578.524	-0.714758	0.137269	-5.20698	1.91938e-07	1.41984e-06
TGDS	342.898	-0.713758	0.178074	-4.00822	6.11789e-05	0.0003051
BMPR1B	101.031	-0.713078	0.285103	-2.50112	0.0123801	0.0353021
TXLNG2P	133.881	-0.712847	0.251284	-2.83682	0.00455655	0.0148512
LRP12	674.545	-0.712457	0.129789	-5.48933	4.03465e-08	3.25855e-07
OSMR	4381.51	-0.712122	0.0802266	-8.87638	6.90706e-19	1.46209e-17
CSTB	1168.5	-0.711288	0.112097	-6.34529	2.22e-10	2.35916e-09
CD47	2912.04	-0.711252	0.0854395	-8.32463	8.45913e-17	1.61092e-15
MIPOL1	148.014	-0.710979	0.242639	-2.93019	0.00338753	0.0114676
ATP8B2	92.0183	-0.710785	0.296847	-2.39445	0.0166453	0.0455274
FUT1	248.93	-0.710612	0.18787	-3.78246	0.000155287	0.000715931
PDCD2L	111.42	-0.709925	0.287594	-2.46849	0.0135683	0.0381994
ZNF324B	77.1088	-0.708863	0.329368	-2.15219	0.0313823	0.0782148
TIMM8A	193.196	-0.708839	0.212551	-3.33491	0.000853277	0.0033537
TTN	291.065	-0.708367	0.178566	-3.96697	7.27926e-05	0.000357471
TMEM132A	324.216	-0.708269	0.177021	-4.00105	6.30632e-05	0.000313703
LAD1	1569.13	-0.708043	0.10068	-7.03262	2.02686e-12	2.67794e-11
RPL37	19187.9	-0.707997	0.0839691	-8.43164	3.40868e-17	6.61125e-16
VPS36	265.88	-0.707961	0.185824	-3.80986	0.000139048	0.000648658
PGAP1	239.363	-0.707382	0.202119	-3.49983	0.000465557	0.00194743
FAM69A	521.649	-0.707213	0.140678	-5.02716	4.97784e-07	3.46272e-06
ARGLU1	1547.2	-0.707167	0.103803	-6.81258	9.58613e-12	1.18876e-10
GLA	469.165	-0.706801	0.149744	-4.72006	2.35773e-06	1.48172e-05
PYGL	3972.07	-0.706783	0.0810415	-8.72124	2.75163e-18	5.64999e-17
TGS1	1178.96	-0.706609	0.105081	-6.72445	1.76257e-11	2.13037e-10
CAMKK2	579.753	-0.706416	0.1406	-5.02429	5.05294e-07	3.51186e-06
XBP1	1002.34	-0.70583	0.111268	-6.34351	2.24584e-10	2.38501e-09
ZNF567	258	-0.704584	0.184861	-3.81142	0.000138171	0.000645424
SRSF8	433.958	-0.704059	0.159753	-4.40717	1.0473e-05	5.99803e-05
INTS6	876.281	-0.703933	0.115523	-6.09344	1.10507e-09	1.09183e-08
SUN1	3837.43	-0.703873	0.080902	-8.70032	3.30959e-18	6.77799e-17
PHLDA3	687.56	-0.703255	0.13493	-5.21201	1.86801e-07	1.38444e-06
GTF3C4	1176.8	-0.703205	0.111257	-6.32057	2.60594e-10	2.74338e-09
KIAA1161	237.954	-0.702789	0.192553	-3.64985	0.00026239	0.00115012
TUFT1	1062.81	-0.702612	0.109451	-6.41943	1.3679e-10	1.48984e-09
LMTK3	96.4153	-0.70217	0.316994	-2.21509	0.0267537	0.0683779
POLR3G	86.7849	-0.702097	0.311208	-2.25604	0.0240683	0.0623646
DUSP14	825.912	-0.701704	0.13321	-5.26764	1.38191e-07	1.04734e-06
AIG1	735.262	-0.701433	0.122815	-5.71131	1.12109e-08	9.74399e-08
SPRYD3	368.917	-0.701259	0.159118	-4.40716	1.04734e-05	5.99803e-05
NIPSNAP1	410.744	-0.701182	0.156444	-4.48201	7.39433e-06	4.35992e-05
DNAJC24	118.069	-0.700775	0.265281	-2.64164	0.00825063	0.0249117
LOC388796	216.548	-0.700698	0.202819	-3.45479	0.000550732	0.00226639
NSDHL	911.553	-0.700555	0.122226	-5.73165	9.94584e-09	8.73116e-08
FAM35A	181.697	-0.698259	0.22329	-3.12714	0.00176517	0.00643907
NLRP2	1238.59	-0.698003	0.106389	-6.56086	5.34966e-11	6.15875e-10
TXNDC12	1052.21	-0.697928	0.109131	-6.39532	1.60212e-10	1.73414e-09
EEF1A1	89609.1	-0.697641	0.0771803	-9.03911	1.57955e-19	3.51858e-18
INTS5	428.471	-0.697043	0.163404	-4.26575	1.99228e-05	0.00010887
LRIG2	101.062	-0.696695	0.289051	-2.41028	0.0159401	0.0439114
ARV1	152.649	-0.6966	0.233916	-2.97799	0.00290143	0.010001
EXOSC4	196.522	-0.695355	0.235785	-2.94911	0.00318696	0.0108717
ZNF584	175.667	-0.694989	0.219658	-3.16396	0.00155636	0.00576055
CEBPZ	1719.79	-0.694946	0.0993406	-6.99559	2.64145e-12	3.46092e-11
LRP4	139.136	-0.694801	0.259739	-2.675	0.00747291	0.0228039
MAMDC4	129.095	-0.694575	0.259924	-2.67222	0.00753505	0.0229624
AEN	479.214	-0.694278	0.146144	-4.75065	2.02762e-06	1.28555e-05
JUP	2495.43	-0.694045	0.0965967	-7.18497	6.72203e-13	9.28643e-12
NOM1	532.643	-0.693927	0.138292	-5.01783	5.22596e-07	3.62731e-06
SHANK3	102.7	-0.693698	0.28357	-2.4463	0.0144332	0.0402243
LHPP	78.4345	-0.693454	0.319679	-2.16922	0.030066	0.0754837
OBFC1	154.406	-0.693258	0.232566	-2.98091	0.00287394	0.00991929
NQO2	245.261	-0.692856	0.196321	-3.5292	0.000416816	0.00175842
ZNF502	187.302	-0.692319	0.219048	-3.16057	0.00157458	0.00582389
METTL5	453.224	-0.692169	0.146964	-4.70977	2.47996e-06	1.55482e-05
KCTD10	727.323	-0.692077	0.124794	-5.54574	2.92708e-08	2.41227e-07
TIPARP	2736.6	-0.692046	0.0918044	-7.53827	4.76242e-14	7.28895e-13
GMEB1	248.757	-0.692035	0.189416	-3.65353	0.000258661	0.00113567
CCDC88B	85.9166	-0.691456	0.314494	-2.19863	0.0279044	0.0707447
SNX4	537.512	-0.691145	0.14072	-4.91149	9.03872e-07	6.06264e-06
ZNF331	471.784	-0.690869	0.144501	-4.78107	1.74362e-06	1.11582e-05
SRPK2	826.331	-0.689783	0.123187	-5.59946	2.15023e-08	1.7984e-07
LRRC8E	286.135	-0.689631	0.186521	-3.69733	0.000217877	0.000970954
TRNT1	224.608	-0.689399	0.206193	-3.34346	0.000827406	0.00326342
ETV3	172.589	-0.689066	0.223397	-3.08449	0.00203901	0.00732908
TSHZ3	210.676	-0.688891	0.212398	-3.2434	0.00118111	0.00448873
C2CD2	579.523	-0.687667	0.136007	-5.05609	4.27929e-07	3.01272e-06
RPS11	6801.09	-0.687644	0.0861013	-7.98645	1.38878e-15	2.41947e-14
RNF219	654.159	-0.687365	0.128607	-5.34469	9.05713e-08	7.00249e-07
CENPH	429.823	-0.687328	0.152669	-4.50209	6.72879e-06	3.9854e-05
KIRREL	679.637	-0.686521	0.130993	-5.24089	1.59803e-07	1.19731e-06
LINC00665	104.182	-0.685982	0.303329	-2.26151	0.0237277	0.0615832
TP53RK	428.623	-0.68586	0.153921	-4.45592	8.35357e-06	4.87622e-05
RPS25	5562.8	-0.685599	0.0859912	-7.97289	1.55001e-15	2.69653e-14
RBM4B	289.825	-0.684838	0.184163	-3.71865	0.000200287	0.000898666
RPS7	5156.86	-0.684451	0.0960916	-7.12291	1.05674e-12	1.42855e-11
RASA4	275.195	-0.683518	0.179779	-3.80198	0.000143542	0.000667284
SIDT2	426.945	-0.683349	0.150225	-4.54885	5.39407e-06	3.22273e-05
RPL34	2634.3	-0.683293	0.0989128	-6.90804	4.91402e-12	6.26854e-11
TMEM170A	164.716	-0.682784	0.2443	-2.79486	0.0051922	0.0166406
DAK	202.97	-0.682508	0.219766	-3.10561	0.00189884	0.00687625
KLF5	2307.26	-0.682394	0.0949866	-7.18411	6.76462e-13	9.33707e-12
GAR1	198.459	-0.681574	0.220688	-3.08841	0.00201234	0.0072423
ZBTB21	415.133	-0.681262	0.156941	-4.34087	1.4192e-05	7.94561e-05
PNO1	909.251	-0.681184	0.11494	-5.92642	3.09602e-09	2.89544e-08
GPAM	501.036	-0.680924	0.155079	-4.39082	1.12922e-05	6.42719e-05
MAD2L1BP	265.99	-0.680488	0.197381	-3.44759	0.000565602	0.00232394
IKBKAP	2284.25	-0.680093	0.0895907	-7.59112	3.17151e-14	4.91132e-13
FAM83H	2196.25	-0.679914	0.0935437	-7.26841	3.63731e-13	5.13758e-12
EIF4E2	564.151	-0.679894	0.137791	-4.93425	8.04596e-07	5.45249e-06
TRIM35	364.34	-0.679862	0.160439	-4.23751	2.26011e-05	0.000121929
DBT	542.897	-0.679394	0.137268	-4.9494	7.44428e-07	5.05563e-06
TSPO	644.114	-0.679345	0.319147	-2.12863	0.0332852	0.0821901
MTMR9	314.149	-0.679186	0.171236	-3.96637	7.29765e-05	0.000358151
ERMP1	1223.42	-0.678531	0.104508	-6.4926	8.43702e-11	9.44383e-10
NQO1	5379.02	-0.678508	0.0856452	-7.92231	2.33133e-15	3.99958e-14
TM9SF4	808.177	-0.67837	0.121181	-5.598	2.1684e-08	1.81168e-07
HIP1	578.418	-0.677727	0.137678	-4.92255	8.54243e-07	5.7592e-06
PBXIP1	463.266	-0.677231	0.14562	-4.65067	3.30865e-06	2.03865e-05
MOB3C	445.675	-0.676669	0.150634	-4.49214	7.05118e-06	4.17164e-05
COX7A2	1138.4	-0.676154	0.114377	-5.91161	3.38789e-09	3.15342e-08
TUBB4B	9802	-0.675595	0.0777356	-8.69094	3.59456e-18	7.33299e-17
RPL18	3813.25	-0.675311	0.0946777	-7.13273	9.83966e-13	1.33246e-11
HLA-E	3720.4	-0.674416	0.0850486	-7.92977	2.1956e-15	3.77495e-14
TRIM47	454.581	-0.674024	0.149294	-4.51474	6.3395e-06	3.77043e-05
PITHD1	1135.67	-0.674008	0.114873	-5.86742	4.42641e-09	4.06102e-08
TOE1	353.069	-0.673851	0.162037	-4.15862	3.20176e-05	0.00016797
NOL8	984.236	-0.673742	0.114169	-5.90127	3.60722e-09	3.34768e-08
RNF43	144.752	-0.673706	0.245946	-2.73924	0.00615808	0.0192947
KLHDC4	144.485	-0.673702	0.239521	-2.81271	0.00491256	0.0158508
RPL10A	4548.19	-0.673618	0.0911884	-7.3871	1.50066e-13	2.20054e-12
RMRP	83019.6	-0.672972	0.191597	-3.51244	0.000444012	0.00186433
MRPL14	638.96	-0.672668	0.129238	-5.20489	1.94111e-07	1.43389e-06
TWISTNB	1243.84	-0.672657	0.11341	-5.93121	3.00714e-09	2.81901e-08
PIGN	803.763	-0.671747	0.119387	-5.62665	1.8374e-08	1.54745e-07
TANK	336.779	-0.671708	0.167989	-3.99852	6.37389e-05	0.000316751
CBX2	134.485	-0.671619	0.247907	-2.70916	0.00674545	0.0208343
FARP2	138.701	-0.670996	0.24703	-2.71625	0.00660258	0.0204492
ZSCAN32	197.847	-0.670955	0.207825	-3.22846	0.0012446	0.00470618
POLG	537.779	-0.670574	0.141651	-4.73399	2.20151e-06	1.39042e-05
PTGFRN	736.811	-0.670226	0.131427	-5.09962	3.40336e-07	2.42861e-06
NUDT1	348.876	-0.670052	0.184314	-3.63537	0.000277577	0.00121029
FARS2	150.711	-0.669566	0.235988	-2.83729	0.00454982	0.0148354
FAM162A	332.602	-0.668724	0.166711	-4.01127	6.03924e-05	0.000301464
DDX5	6737.89	-0.668145	0.076874	-8.69143	3.57907e-18	7.31088e-17
ZFP3	97.5618	-0.667596	0.28947	-2.30627	0.0210957	0.0556975
EAF1	544.23	-0.667514	0.144355	-4.62413	3.76168e-06	2.29445e-05
RAB11FIP3	254.701	-0.66733	0.187685	-3.55557	0.000377154	0.00160405
TRA2B	3857.58	-0.667287	0.0830985	-8.03007	9.74178e-16	1.71614e-14
EPAS1	932.765	-0.667196	0.114893	-5.80709	6.35667e-09	5.71737e-08
LOC284581	122.041	-0.666486	0.265829	-2.5072	0.0121693	0.0347956
SEPW1	931.296	-0.666349	0.117351	-5.67827	1.36063e-08	1.16713e-07
ALDH3A2	2788.77	-0.666275	0.0885497	-7.5243	5.30024e-14	8.06507e-13
ZNF232	152.606	-0.665896	0.241831	-2.75356	0.00589503	0.0185905
NANP	817.771	-0.665344	0.11987	-5.55055	2.84772e-08	2.35426e-07
FDPS	891.289	-0.665336	0.117943	-5.64119	1.68879e-08	1.42994e-07
IL10RB	370.934	-0.664752	0.166542	-3.99149	6.56588e-05	0.00032564
KIAA1147	289.045	-0.664429	0.177687	-3.73932	0.000184517	0.000836247
ECE2	257.562	-0.664205	0.210319	-3.15809	0.00158807	0.00586412
GFOD2	366.435	-0.664204	0.165526	-4.0127	6.00294e-05	0.000299842
GPATCH2L	449.555	-0.663692	0.148182	-4.47889	7.50318e-06	4.41418e-05
CLDN7	195.537	-0.663507	0.236886	-2.80096	0.00509513	0.0163728
ZNF566	142.143	-0.663358	0.243118	-2.72854	0.00636148	0.0198155
TERF2	202.668	-0.663285	0.207234	-3.20066	0.00137114	0.00513291
BAIAP2	1250.25	-0.663252	0.113512	-5.84302	5.12617e-09	4.65315e-08
ZBTB6	689.589	-0.662757	0.128658	-5.15132	2.58657e-07	1.87896e-06
ETFDH	130.349	-0.662444	0.252013	-2.62861	0.00857337	0.0257528
LOC401397	490.094	-0.662142	0.145831	-4.54048	5.61274e-06	3.3483e-05
RPL31	6298.46	-0.662092	0.0920997	-7.18886	6.53344e-13	9.04175e-12
TMEM241	150.265	-0.661954	0.235317	-2.81303	0.00490764	0.0158382
KIAA0930	2456.14	-0.661876	0.0936898	-7.06455	1.61136e-12	2.14155e-11
QPCTL	145.592	-0.661681	0.248038	-2.66766	0.00763822	0.0232318
C1orf131	291.409	-0.661659	0.182705	-3.62147	0.000292938	0.00127198
XPR1	1039.04	-0.660414	0.115	-5.74271	9.31748e-09	8.2024e-08
C1orf172	325.776	-0.660145	0.178097	-3.70665	0.000210017	0.000938831
NHLRC1	121.729	-0.659993	0.258954	-2.54869	0.0108128	0.0314132
SENP5	2678.74	-0.659671	0.0921775	-7.15652	8.27478e-13	1.13026e-11
ZMYND19	784.93	-0.659588	0.124069	-5.3163	1.05897e-07	8.13153e-07
CD68	878.813	-0.658701	0.115026	-5.72655	1.02493e-08	8.98252e-08
POLR3K	160.656	-0.65867	0.231274	-2.84801	0.0043994	0.0144196
RPL29	3279.24	-0.65851	0.0957475	-6.87757	6.08831e-12	7.69541e-11
RAB1A	2394.43	-0.65812	0.0903013	-7.28804	3.14492e-13	4.50677e-12
COX10	135.981	-0.657858	0.249665	-2.63496	0.0084146	0.0253533
TMEM41B	798.282	-0.657736	0.129056	-5.0965	3.45982e-07	2.46332e-06
TXNL4B	177.756	-0.657252	0.220792	-2.97679	0.00291282	0.0100337
B3GNT2	516.719	-0.656719	0.144667	-4.53952	5.63817e-06	3.36092e-05
TRAP1	849.767	-0.656366	0.124281	-5.28131	1.28264e-07	9.76806e-07
MRPS25	281.349	-0.655881	0.180455	-3.63459	0.000278422	0.0012133
GNG12	3937.09	-0.655779	0.0816583	-8.03077	9.68605e-16	1.70824e-14
NIT2	405.692	-0.655708	0.154927	-4.23238	2.31231e-05	0.000124543
LOC100130744	79.5996	-0.655535	0.319461	-2.05201	0.0401691	0.0965836
LOC284454	205.203	-0.65553	0.209536	-3.12848	0.00175712	0.00641651
ODC1	1705.02	-0.655331	0.100549	-6.51751	7.14847e-11	8.10521e-10
ZDHHC7	1639.1	-0.655251	0.100498	-6.52007	7.02761e-11	7.97391e-10
KIAA1551	691.85	-0.655174	0.141381	-4.6341	3.58488e-06	2.20025e-05
BRD2	2705.03	-0.655042	0.0871473	-7.51649	5.62665e-14	8.55348e-13
MAP2K3	850.486	-0.655024	0.127334	-5.14412	2.68776e-07	1.94708e-06
CYCS	4011.94	-0.654874	0.0832885	-7.86271	3.75899e-15	6.32549e-14
ZNF397	124.153	-0.654657	0.256819	-2.5491	0.0108	0.0313827
SCD5	284.008	-0.654395	0.184123	-3.55412	0.000379248	0.00161252
LOC286467	162.228	-0.653927	0.23189	-2.81998	0.00480261	0.0155343
C6orf203	148.879	-0.653836	0.23952	-2.72978	0.00633772	0.0197708
SLC31A2	837.765	-0.653744	0.117478	-5.56484	2.62392e-08	2.17839e-07
SYCP2	1984.95	-0.653301	0.117275	-5.5707	2.53723e-08	2.11088e-07
ZNF451	2749	-0.653093	0.0894946	-7.29757	2.93017e-13	4.21436e-12
FERMT2	166.203	-0.652837	0.230347	-2.83415	0.00459475	0.0149572
WDR1	7101.59	-0.652607	0.0860966	-7.57994	3.45713e-14	5.33787e-13
HNRNPF	2591.17	-0.652601	0.0881988	-7.39921	1.37001e-13	2.02215e-12
PCCB	544.632	-0.65176	0.140656	-4.63371	3.59178e-06	2.20362e-05
CBR4	109.675	-0.651657	0.285328	-2.28388	0.0223783	0.0586124
PSPC1	841.899	-0.651377	0.124014	-5.25243	1.50105e-07	1.13056e-06
RBM18	981.243	-0.651101	0.118425	-5.49799	3.8415e-08	3.11373e-07
RASIP1	527.095	-0.650134	0.143881	-4.51855	6.22633e-06	3.70451e-05
EPC1	343.195	-0.649128	0.167247	-3.88125	0.000103921	0.000494918
BLVRB	1184.08	-0.648886	0.131787	-4.92376	8.48948e-07	5.73331e-06
B4GALT5	1153.1	-0.648602	0.111108	-5.83758	5.29646e-09	4.79942e-08
CTR9	629.66	-0.647612	0.129326	-5.0076	5.51127e-07	3.80855e-06
DSP	6079.35	-0.647547	0.0900837	-7.18828	6.56131e-13	9.07235e-12
SERGEF	102.324	-0.64734	0.288474	-2.24401	0.0248316	0.0641056
ZNF398	499.135	-0.646318	0.141199	-4.57734	4.70921e-06	2.8329e-05
PDLIM4	364.127	-0.646119	0.160595	-4.02328	5.73935e-05	0.000287697
YOD1	954.029	-0.645794	0.117797	-5.48228	4.19881e-08	3.379e-07
PRRG4	508.124	-0.64556	0.141057	-4.57658	4.72644e-06	2.84218e-05
PLCD1	101.908	-0.644901	0.28147	-2.29119	0.0219525	0.0576793
JMJD4	196.083	-0.644184	0.20912	-3.08045	0.00206688	0.00741996
BCR	1061.05	-0.643729	0.116548	-5.52331	3.32668e-08	2.71884e-07
ZNF317	478.141	-0.643484	0.144373	-4.45709	8.30815e-06	4.8533e-05
CEP290	519.813	-0.643267	0.163612	-3.93166	8.43614e-05	0.000408425
RABGAP1L	519.006	-0.642979	0.144646	-4.44518	8.78178e-06	5.10348e-05
ZNF525	724.868	-0.642415	0.124552	-5.15782	2.49844e-07	1.82082e-06
CDC42EP4	679.96	-0.642389	0.126552	-5.07609	3.85278e-07	2.72585e-06
MANBA	678.659	-0.642309	0.132178	-4.85942	1.17733e-06	7.75804e-06
RAB31	727.926	-0.642233	0.122589	-5.2389	1.6154e-07	1.20974e-06
ACACA	1488.66	-0.642	0.120579	-5.32433	1.01326e-07	7.79574e-07
SNHG8	420.646	-0.641561	0.150691	-4.25747	2.06757e-05	0.000112555
CD40	104.442	-0.640622	0.281155	-2.27854	0.0226947	0.0593127
OMA1	252.78	-0.640198	0.19319	-3.31383	0.000920285	0.00359196
FAM210A	557.406	-0.64012	0.139324	-4.59448	4.33831e-06	2.62482e-05
RPS23	3848.91	-0.640032	0.0922287	-6.93962	3.9316e-12	5.05873e-11
FAM46B	528.844	-0.639998	0.15318	-4.17809	2.93966e-05	0.00015541
C12orf44	766.036	-0.63994	0.146074	-4.38095	1.18165e-05	6.70867e-05
ULBP2	256.54	-0.639915	0.188889	-3.38779	0.000704585	0.00282642
PFKM	705.1	-0.639863	0.127	-5.0383	4.69694e-07	3.2789e-06
COL18A1	154.256	-0.639747	0.234065	-2.7332	0.00627226	0.0195879
FAM89A	137.006	-0.639616	0.245266	-2.60784	0.00911143	0.0271105
DHTKD1	527.224	-0.6383	0.142428	-4.48155	7.41011e-06	4.36759e-05
SEMA7A	332.016	-0.6369	0.182567	-3.48859	0.000485579	0.00202098
EIF1B	127.593	-0.63686	0.258739	-2.4614	0.0138397	0.038807
C10orf88	170.04	-0.636701	0.222299	-2.86417	0.00418107	0.0138046
GNL2	1744.53	-0.636455	0.0949119	-6.70575	2.0038e-11	2.40715e-10
TRAPPC2P1	87.7418	-0.636267	0.305473	-2.08289	0.0372613	0.0905039
ZNF518A	513.338	-0.63598	0.161431	-3.93964	8.1603e-05	0.000396045
C2orf44	141.958	-0.635119	0.2417	-2.62772	0.00859598	0.0258075
PITPNB	502.89	-0.634874	0.173714	-3.6547	0.000257482	0.00113081
TRIM36	129.71	-0.634716	0.255793	-2.48136	0.013088	0.0370392
44449	2798.13	-0.634628	0.0880281	-7.20937	5.62103e-13	7.83412e-12
ST14	1296.52	-0.633963	0.107195	-5.91414	3.33616e-09	3.11079e-08
ZFP36L2	342.629	-0.633541	0.172869	-3.66486	0.00024747	0.00109049
ZNF480	503.218	-0.63343	0.155525	-4.07286	4.64395e-05	0.000236591
DYNLL1	3417.3	-0.632727	0.0881506	-7.17779	7.08464e-13	9.76168e-12
RREB1	299.898	-0.632295	0.185721	-3.40454	0.000662756	0.00267566
MRPL32	767.688	-0.632161	0.121223	-5.21487	1.83942e-07	1.36453e-06
LOC285074	88.8369	-0.632154	0.302271	-2.09134	0.0364972	0.0889912
ZNF264	842.799	-0.631746	0.131919	-4.78889	1.6771e-06	1.07543e-05
NFS1	661.663	-0.63113	0.127925	-4.93359	8.07298e-07	5.46609e-06
FIG4	182.93	-0.631003	0.215596	-2.92679	0.00342485	0.0115598
PANK3	854.376	-0.630925	0.119283	-5.2893	1.22787e-07	9.37698e-07
SLC9A1	204.678	-0.630711	0.21827	-2.8896	0.00385735	0.0128543
CYBA	179.194	-0.629547	0.23853	-2.63928	0.00830834	0.0250619
METTL2B	350.656	-0.629505	0.163808	-3.84295	0.000121563	0.000573204
ZNF593	249.966	-0.62896	0.197376	-3.18661	0.00143953	0.00536467
OSGEPL1	103.778	-0.628931	0.284501	-2.21065	0.0270601	0.0689929
SZT2	744.531	-0.628857	0.135885	-4.62786	3.69464e-06	2.25793e-05
NT5E	2417.71	-0.6278	0.0876534	-7.16229	7.93384e-13	1.08747e-11
TMEM216	239.164	-0.626465	0.199021	-3.14774	0.00164537	0.00604454
CUEDC2	197.382	-0.625869	0.207929	-3.01002	0.00261232	0.00911014
SAP30BP	892.017	-0.625679	0.116994	-5.34795	8.89549e-08	6.90123e-07
TEP1	331.93	-0.625605	0.167834	-3.72751	0.000193378	0.000871142
SMYD3	179.449	-0.625202	0.219501	-2.84828	0.00439557	0.014413
GDA	1953.69	-0.625198	0.091815	-6.80932	9.80593e-12	1.21124e-10
SLPI	265.901	-0.624734	0.182384	-3.42538	0.000613938	0.00249263
TGFBRAP1	314.135	-0.624718	0.171497	-3.64274	0.000269747	0.00117811
RPS4X	7985.89	-0.624396	0.0771094	-8.09753	5.60869e-16	1.0095e-14
ITGB1	20766	-0.624068	0.0727299	-8.58063	9.43575e-18	1.88823e-16
TBRG4	1308.39	-0.623663	0.106505	-5.8557	4.75016e-09	4.33432e-08
AAAS	330.747	-0.623274	0.167129	-3.72931	0.000192007	0.00086546
FBXO31	303.567	-0.622579	0.172056	-3.61847	0.000296351	0.00128574
PRELID2	103.465	-0.622472	0.281462	-2.21157	0.0269966	0.0688868
TM2D3	197.42	-0.622138	0.209389	-2.97121	0.00296629	0.0102022
DUOXA1	174.628	-0.621729	0.220362	-2.8214	0.00478139	0.015472
CLDN4	251.809	-0.621584	0.210257	-2.9563	0.0031135	0.0106504
NOP58	1869.54	-0.621575	0.0942819	-6.59273	4.31812e-11	5.0115e-10
HIST1H2BM	727.18	-0.62147	0.12332	-5.03947	4.66814e-07	3.26024e-06
ZNF3	407.729	-0.621467	0.156828	-3.96273	7.40991e-05	0.000362869
THUMPD2	289.433	-0.621335	0.184805	-3.36212	0.000773471	0.00307223
ASB6	806.034	-0.621222	0.122049	-5.08992	3.58213e-07	2.54122e-06
ZNF304	459.098	-0.621182	0.148457	-4.18426	2.86101e-05	0.000151558
GZF1	1067.27	-0.620152	0.114172	-5.43176	5.58025e-08	4.42069e-07
METTL8	341.575	-0.619931	0.173211	-3.57906	0.000344836	0.00147537
ACN9	146.74	-0.619814	0.253826	-2.44189	0.0146107	0.0406759
MTF1	421.44	-0.619634	0.158597	-3.90697	9.34591e-05	0.000449568
NUFIP1	199.723	-0.619611	0.207869	-2.98077	0.00287522	0.00992154
MFAP3	862.54	-0.619341	0.121285	-5.10647	3.28232e-07	2.34863e-06
SERINC2	2468.94	-0.619337	0.0954621	-6.48778	8.7111e-11	9.72987e-10
THEM6	348.998	-0.619258	0.164142	-3.7727	0.00016149	0.000740842
RASGRF1	93.9192	-0.619002	0.297099	-2.08349	0.0372064	0.0903987
COMMD6	717.08	-0.618523	0.13335	-4.63834	3.51218e-06	2.15899e-05
ZC3H8	216.982	-0.618239	0.200707	-3.08031	0.00206786	0.00742001
NME3	110.53	-0.617995	0.287102	-2.15253	0.031356	0.0781617
PCGF1	204.158	-0.617744	0.20552	-3.00576	0.00264915	0.00921411
KBTBD6	220.72	-0.61735	0.203919	-3.02742	0.00246651	0.0086551
NPM3	235.705	-0.617313	0.191928	-3.21639	0.00129816	0.00489226
RPS3	10280.1	-0.616357	0.0827339	-7.44988	9.34272e-14	1.39866e-12
UQCC	592.351	-0.615835	0.13392	-4.59852	4.25497e-06	2.57836e-05
CCS	251.821	-0.615608	0.199151	-3.09117	0.00199371	0.00718184
MTM1	703.376	-0.615257	0.124125	-4.95674	7.16849e-07	4.87885e-06
KDELC1	306.256	-0.614716	0.180944	-3.39727	0.000680607	0.00274
SLC25A26	141.522	-0.614297	0.245384	-2.50341	0.0123001	0.0351124
CRIP2	765.812	-0.6136	0.130242	-4.71121	2.46246e-06	1.54507e-05
VDAC2	1678.36	-0.613181	0.0969395	-6.3254	2.52575e-10	2.66787e-09
HMGN4	1539.71	-0.612518	0.100092	-6.11953	9.38524e-10	9.31368e-09
IFI27L2	198.577	-0.611468	0.211296	-2.89389	0.00380502	0.0126987
GPX1	1704.63	-0.610788	0.109939	-5.55571	2.76483e-08	2.29054e-07
TADA2B	440.072	-0.610639	0.148231	-4.11952	3.79667e-05	0.00019669
CALM1	2636	-0.610431	0.0888008	-6.87416	6.23582e-12	7.86922e-11
MAPK1IP1L	1095.77	-0.610163	0.10909	-5.59319	2.22929e-08	1.86156e-07
ALKBH4	119.019	-0.610099	0.26296	-2.32012	0.0203343	0.0539588
FADD	771.259	-0.609945	0.121414	-5.02368	5.06914e-07	3.52157e-06
EMP2	1052.75	-0.609915	0.108549	-5.6188	1.92286e-08	1.61683e-07
TIMM23	572.909	-0.609448	0.133533	-4.56402	5.01823e-06	3.00731e-05
ADAM22	106.123	-0.608718	0.276123	-2.20452	0.027488	0.0698691
AMIGO2	1130.97	-0.60824	0.109816	-5.53872	3.04694e-08	2.5045e-07
RPP14	321.197	-0.607968	0.177054	-3.4338	0.000595189	0.00242463
TRIM41	199.169	-0.607835	0.207173	-2.93395	0.00334677	0.01134
ELMOD2	460.329	-0.607504	0.152859	-3.97429	7.0589e-05	0.000347408
MVD	311.409	-0.60746	0.170733	-3.55795	0.000373758	0.00159047
RPS18	9134.26	-0.606764	0.0869794	-6.97595	3.03805e-12	3.95299e-11
EDEM2	507.931	-0.606364	0.140081	-4.32867	1.50016e-05	8.36615e-05
NAA25	823.355	-0.605466	0.117631	-5.14715	2.6447e-07	1.91942e-06
TRMT6	1423.98	-0.605357	0.10099	-5.99423	2.04449e-09	1.96094e-08
PSMD9	694.565	-0.605047	0.137742	-4.39261	1.11995e-05	6.37908e-05
MID1IP1	440.336	-0.604727	0.15298	-3.95298	7.71834e-05	0.000376918
MINA	429.483	-0.604495	0.150063	-4.02827	5.61883e-05	0.000282358
LRIF1	353.029	-0.604361	0.165603	-3.64945	0.000262805	0.00115162
ZNF251	231.727	-0.604137	0.195576	-3.08902	0.00200819	0.00723066
PAN2	453.695	-0.603806	0.148659	-4.06168	4.87202e-05	0.000247514
CCDC59	492.823	-0.60358	0.150395	-4.01331	5.98732e-05	0.000299157
STXBP1	292.599	-0.603385	0.194385	-3.10407	0.00190881	0.00690284
LTV1	781.545	-0.603079	0.12263	-4.91787	8.74922e-07	5.88099e-06
PLD3	911.215	-0.602992	0.1166	-5.17144	2.32294e-07	1.70237e-06
MRPS17	486.831	-0.60281	0.142336	-4.23511	2.28439e-05	0.000123166
NAB1	2224.45	-0.602517	0.0908589	-6.63135	3.32628e-11	3.91522e-10
MKNK1	553.817	-0.602353	0.135999	-4.42909	9.4631e-06	5.46514e-05
TSPAN14	519.277	-0.602196	0.144461	-4.16857	3.06515e-05	0.000161448
SDC4	7496.53	-0.602151	0.0758494	-7.93878	2.04183e-15	3.5221e-14
ZNF557	227.33	-0.601397	0.196674	-3.05784	0.00222939	0.00791495
FAM136A	721.089	-0.600761	0.134117	-4.47939	7.48571e-06	4.40555e-05
POLR3H	356.176	-0.600626	0.162309	-3.70051	0.000215166	0.000959959
NDUFA8	1049.17	-0.600452	0.109882	-5.46449	4.6423e-08	3.71502e-07
RPL10	13699.2	-0.600032	0.0850222	-7.05735	1.69703e-12	2.2535e-11
SHQ1	252.454	-0.599198	0.18668	-3.20977	0.00132843	0.00499557
C14orf1	280.427	-0.599129	0.179995	-3.3286	0.000872847	0.00342292
URI1	1446.44	-0.59891	0.0992438	-6.03473	1.59225e-09	1.54032e-08
GNB2L1	6569.48	-0.597678	0.0835919	-7.14995	8.6808e-13	1.18162e-11
LAMTOR4	404.477	-0.597512	0.163437	-3.65593	0.000256255	0.00112573
MAN2C1	287.128	-0.597415	0.182555	-3.27251	0.00106596	0.00408761
TYW1	150.63	-0.597286	0.251961	-2.37055	0.0177616	0.0480962
SPTY2D1	552.656	-0.596044	0.136078	-4.38016	1.1859e-05	6.73035e-05
PPIB	1298.1	-0.595878	0.118361	-5.03442	4.79286e-07	3.34142e-06
CRLF3	483.647	-0.59569	0.145371	-4.09771	4.17263e-05	0.000214404
TINF2	797.146	-0.595017	0.120679	-4.93057	8.19902e-07	5.5419e-06
METTL21D	123.277	-0.594683	0.256872	-2.3151	0.0206074	0.0545731
RPL4	14350.4	-0.594623	0.0781254	-7.61114	2.71695e-14	4.23657e-13
STAP2	217.831	-0.594151	0.214917	-2.76457	0.00569984	0.0180799
DHRS7B	435.676	-0.593951	0.150191	-3.95463	7.66523e-05	0.000374557
ZNF7	452.283	-0.593944	0.14883	-3.99074	6.58668e-05	0.000326412
FZD5	167.418	-0.593908	0.227131	-2.61482	0.00892745	0.0266335
PPP1R13L	357.609	-0.593556	0.163269	-3.63544	0.000277504	0.00121029
ATF4	2976.44	-0.593323	0.0873763	-6.79043	1.11801e-11	1.37559e-10
OGDH	2189.87	-0.593191	0.0927754	-6.39384	1.61771e-10	1.74981e-09
SDAD1	1055.66	-0.593038	0.108714	-5.45501	4.8969e-08	3.90488e-07
CXorf38	398.791	-0.59301	0.158713	-3.73637	0.000186699	0.000843951
ASTE1	156.154	-0.592047	0.231061	-2.5623	0.0103982	0.0304163
SLK	1997.86	-0.591713	0.0922427	-6.41474	1.41061e-10	1.53529e-09
DERL1	1974.96	-0.59163	0.093436	-6.33193	2.42117e-10	2.55913e-09
GPSM1	323.265	-0.591501	0.189107	-3.12787	0.00176079	0.00642806
GALC	161.395	-0.591099	0.234423	-2.52151	0.0116852	0.0335394
ITPRIP	465.36	-0.590849	0.146934	-4.02118	5.79061e-05	0.000290065
FOXE1	374.961	-0.590691	0.161053	-3.66769	0.000244755	0.00108034
FHAD1	101.986	-0.590653	0.285665	-2.06764	0.0386738	0.0934163
TMEM186	130.999	-0.590188	0.251394	-2.34766	0.0188915	0.0507162
ATG10	121.302	-0.589943	0.262796	-2.24487	0.0247762	0.0639883
PRPF4	2070.77	-0.589516	0.0922643	-6.38942	1.66514e-10	1.79495e-09
MREG	295.987	-0.589113	0.179443	-3.283	0.00102707	0.00395679
UCHL1	313.538	-0.588905	0.173244	-3.39929	0.000675619	0.00272201
GRPEL2	469.829	-0.588407	0.147055	-4.00128	6.30017e-05	0.000313496
CBR1	850.207	-0.588387	0.117321	-5.01519	5.29821e-07	3.67099e-06
AIF1L	465.294	-0.58825	0.147953	-3.97591	7.01092e-05	0.000345371
IFNGR2	627.727	-0.587958	0.135176	-4.34959	1.36394e-05	7.66367e-05
GRTP1	171.306	-0.58794	0.234124	-2.51123	0.0120311	0.0344379
ZNHIT1	325.593	-0.587895	0.168932	-3.48007	0.000501282	0.0020781
OXNAD1	215.072	-0.587618	0.200426	-2.93185	0.00336948	0.011412
OLFML2A	2298.42	-0.587196	0.111568	-5.26313	1.41625e-07	1.07233e-06
SNAPC4	186.347	-0.587187	0.215116	-2.72962	0.00634066	0.0197741
CLSTN1	2682.17	-0.58694	0.0968912	-6.05773	1.3806e-09	1.3505e-08
ZNF746	310.197	-0.586775	0.177756	-3.30102	0.00096335	0.00374343
PPIA	25627.4	-0.586545	0.0762595	-7.69144	1.45487e-14	2.3309e-13
TSPAN5	676.967	-0.586463	0.126939	-4.62002	3.83707e-06	2.33772e-05
TC2N	141.179	-0.586235	0.245325	-2.38963	0.0168655	0.0460576
SHFM1	1072.85	-0.58575	0.108485	-5.39938	6.68699e-08	5.25254e-07
SRD5A1	1073.99	-0.58529	0.110182	-5.31204	1.08403e-07	8.31582e-07
MIR100HG	137.891	-0.585226	0.2468	-2.37125	0.0177278	0.048013
ITGA3	10794.7	-0.584281	0.0726325	-8.04434	8.67087e-16	1.53954e-14
ATP5G3	1212.03	-0.58421	0.10926	-5.34697	8.9439e-08	6.92855e-07
PDIA6	2362.41	-0.584182	0.0894794	-6.52868	6.63534e-11	7.56697e-10
ZNF808	147.18	-0.584055	0.241463	-2.41882	0.0155711	0.0430228
HIST1H2AE	1681.52	-0.583985	0.111097	-5.25652	1.46805e-07	1.10889e-06
AHNAK2	2306.58	-0.583478	0.097153	-6.00577	1.90431e-09	1.82983e-08
SAMD4A	259.32	-0.583442	0.185252	-3.14944	0.00163582	0.00601648
ZNF765	511.155	-0.583441	0.141019	-4.13732	3.51384e-05	0.000183304
HADH	607.181	-0.583403	0.139052	-4.19558	2.72174e-05	0.000144667
RPS19	6070.05	-0.58333	0.1019	-5.72455	1.03707e-08	9.07885e-08
CDH3	4351.32	-0.583323	0.0816202	-7.1468	8.88228e-13	1.20801e-11
NRBP2	130.022	-0.583105	0.251842	-2.31536	0.0205933	0.0545541
CD46	3613.64	-0.583019	0.0877043	-6.64756	2.98e-11	3.53404e-10
ZUFSP	255.706	-0.582837	0.188512	-3.09177	0.00198969	0.00717719
PGGT1B	280.56	-0.582735	0.181933	-3.20302	0.00135994	0.00509944
IAH1	174.245	-0.582574	0.228347	-2.55127	0.0107331	0.0312335
NFXL1	470.017	-0.582547	0.146136	-3.98633	6.71024e-05	0.000332117
NAA20	1714.65	-0.582501	0.094774	-6.14621	7.9354e-10	7.9349e-09
DRAM2	182.407	-0.582328	0.218749	-2.66208	0.007766	0.0235977
NXF1	684.177	-0.581907	0.130225	-4.46848	7.87776e-06	4.61215e-05
PDCL3	265.887	-0.581895	0.18465	-3.15133	0.00162529	0.00598441
PLXNA2	889.635	-0.581785	0.132387	-4.39458	1.10988e-05	6.324e-05
CRKL	1817.02	-0.581281	0.09362	-6.20894	5.33431e-10	5.45165e-09
CSRNP1	260.657	-0.581149	0.197231	-2.94653	0.00321357	0.0109405
RPL13	6630.25	-0.581012	0.102348	-5.67682	1.37224e-08	1.17645e-07
G3BP2	3709.59	-0.580867	0.084877	-6.84363	7.72112e-12	9.68152e-11
RPL27A	4404	-0.580454	0.0884142	-6.56517	5.19722e-11	5.98764e-10
NOD1	188.728	-0.580375	0.212217	-2.73482	0.00624143	0.0195187
MEST	1064.77	-0.580191	0.110697	-5.24124	1.59499e-07	1.1956e-06
PDRG1	390.255	-0.580082	0.168307	-3.44656	0.000567767	0.0023298
E2F6	390.773	-0.579765	0.155097	-3.73808	0.000185433	0.000839915
ITGB3BP	263.506	-0.579195	0.188466	-3.07321	0.00211767	0.00756599
C9orf72	167.554	-0.579073	0.227645	-2.54375	0.0109669	0.0318138
ZNF16	215.449	-0.579063	0.20168	-2.87119	0.00408926	0.0135525
TBC1D14	781.467	-0.578909	0.120071	-4.8214	1.42554e-06	9.25047e-06
RPS26	918.209	-0.578446	0.115614	-5.00326	5.63675e-07	3.89185e-06
CAMSAP2	2148.2	-0.578419	0.110527	-5.23327	1.66536e-07	1.24361e-06
SPEG	199.634	-0.578252	0.206156	-2.80492	0.00503287	0.0161926
C17orf76-AS1	6651.32	-0.577918	0.0796563	-7.25515	4.01212e-13	5.64168e-12
RAB3IP	541.226	-0.577853	0.149022	-3.87763	0.00010548	0.000501874
MCMDC2	106.782	-0.577683	0.276529	-2.08905	0.0367028	0.0893957
PPP1R3D	214.171	-0.577395	0.200964	-2.87312	0.00406436	0.0134729
FKBP14	989.326	-0.576952	0.114746	-5.02807	4.95441e-07	3.44794e-06
GOLT1B	1017.86	-0.576607	0.119616	-4.82048	1.43214e-06	9.28782e-06
STAT6	1140.2	-0.575973	0.107803	-5.34283	9.15069e-08	7.07136e-07
CASP4	1484.92	-0.57595	0.100603	-5.72499	1.03437e-08	9.06023e-08
TMEM258	682.195	-0.575868	0.134144	-4.29291	1.76348e-05	9.72447e-05
FAM129A	2126.42	-0.575837	0.0914945	-6.29368	3.10026e-10	3.2378e-09
PDIA4	5474.31	-0.575704	0.0793164	-7.25832	3.9193e-13	5.51608e-12
ANAPC11	485.815	-0.575601	0.156852	-3.66971	0.000242822	0.00107271
JAGN1	207.014	-0.575484	0.203997	-2.82104	0.00478677	0.0154862
HAUS7	310.69	-0.574692	0.177464	-3.23835	0.00120224	0.00456021
DGKH	433.019	-0.574156	0.171083	-3.35601	0.00079075	0.00313139
HDHD1	218.074	-0.573589	0.203565	-2.81772	0.00483664	0.0156347
CCDC101	205.613	-0.572941	0.213162	-2.68782	0.00719194	0.022049
RPL36AL	1214.72	-0.572822	0.109636	-5.22477	1.74375e-07	1.29969e-06
RPL7L1	1195.81	-0.572391	0.115466	-4.95724	7.15025e-07	4.86854e-06
C19orf57	122.562	-0.572243	0.260704	-2.19499	0.0281642	0.0713342
POLR3F	600.038	-0.571651	0.1356	-4.2157	2.48999e-05	0.000133429
FOXN2	440.215	-0.571454	0.148296	-3.85348	0.000116453	0.000550922
MCPH1	372.945	-0.57124	0.159175	-3.58876	0.000332251	0.00142578
CES2	1548.56	-0.570904	0.0972113	-5.87282	4.28446e-09	3.93675e-08
CYFIP1	2335.13	-0.570688	0.091195	-6.25789	3.90213e-10	4.04307e-09
PJA1	598.438	-0.57044	0.132879	-4.29294	1.76324e-05	9.72447e-05
SRFBP1	307.289	-0.569781	0.180667	-3.15377	0.00161177	0.00594328
LRPAP1	2585.42	-0.569776	0.0899523	-6.3342	2.38576e-10	2.52339e-09
HSPA12A	185.233	-0.56929	0.212997	-2.67276	0.007523	0.0229301
B3GNT5	1234.34	-0.569143	0.107604	-5.28923	1.22831e-07	9.37698e-07
ALDH18A1	1113.73	-0.568897	0.107437	-5.29519	1.18895e-07	9.0941e-07
SIN3B	409.557	-0.568449	0.155915	-3.64589	0.000266473	0.00116575
MRTO4	993.928	-0.568387	0.115478	-4.92204	8.56478e-07	5.77179e-06
TAF13	415.444	-0.568169	0.165098	-3.4414	0.000578719	0.00237042
ZFY	426.262	-0.568166	0.152172	-3.73371	0.000188683	0.000851939
SGSM3	261.084	-0.567331	0.185522	-3.05802	0.00222802	0.00791309
RAB4A	429.184	-0.566962	0.158597	-3.57487	0.000350404	0.00149716
RPL7A	17721.4	-0.566642	0.0778912	-7.27479	3.46951e-13	4.91821e-12
RPL27	4129.56	-0.566556	0.0933378	-6.06996	1.27946e-09	1.25778e-08
CCDC41	198.451	-0.565788	0.216216	-2.61677	0.00887651	0.0265167
RPS9	2863.03	-0.56554	0.0910119	-6.21391	5.16836e-10	5.29925e-09
HMGXB4	448.047	-0.565539	0.152608	-3.70582	0.000210709	0.000941405
BRIP1	899.458	-0.565335	0.121545	-4.65123	3.29967e-06	2.03391e-05
MTRR	1643.04	-0.565132	0.0988648	-5.71622	1.08922e-08	9.49315e-08
STAT5A	125.252	-0.564453	0.266905	-2.11481	0.034446	0.0845791
EIF3M	1076.21	-0.564392	0.112957	-4.99652	5.83747e-07	4.02339e-06
[truncated: 4,608 more rows]

## Sheet: SCC152 shp63 combined DEGs
	log2FC sh1	log2FC sh2	log2FC shAVE
HMGCS2	-3.01447	-7.61685	-5.31566
SHROOM4	-2.40013	-7.35133	-4.87573
PRG1	-2.31473	-6.21349	-4.26411
C12orf54	-1.60206	-6.56186	-4.08196
PLA2G4F	-2.35788	-5.76427	-4.06107
AADAC	-1.9364	-6.08898	-4.01269
AQP10	-1.35484	-6.08038	-3.71761
CA12	-1.93388	-5.44029	-3.68708
FOXP2	-3.0135	-4.24702	-3.63026
CASP1P2	-2.27196	-4.7893	-3.53063
FAT2	-1.45697	-5.43369	-3.44533
KRT5	-3.15164	-3.73477	-3.44321
AKR1B10	-2.09038	-4.62263	-3.35651
EGLN3	-2.19414	-4.46852	-3.33133
LOC158434	-3.91501	-2.65788	-3.28644
ST8SIA1	-3.02377	-3.4578	-3.24079
NLRP1	-1.48228	-4.96768	-3.22498
MAB21L3	-3.56065	-2.88297	-3.22181
KRT1	-2.85821	-3.40443	-3.13132
NDRG1	-0.963403	-5.17053	-3.06697
LINC01512	-2.50397	-3.49836	-3.00117
DAPL1	-0.71609	-5.28191	-2.999
AADACP1	-2.34658	-3.54332	-2.94495
GBP6	-2.26923	-3.58012	-2.92468
GBP1P1	-2.10948	-3.72335	-2.91642
KRT32	-1.26409	-4.54925	-2.90667
RHOH	-2.07105	-3.61441	-2.84273
LOC100129316	-2.83189	-2.79086	-2.81138
LINC00970	-2.86593	-2.73658	-2.80126
EGFL6	-2.58093	-3.00202	-2.79148
CASP1	-1.79962	-3.74439	-2.772
ODF3L1	-2.91182	-2.63008	-2.77095
ZNF812	-2.17017	-3.25264	-2.7114
OTUD7A	-2.78558	-2.56251	-2.67404
TENM2	-2.06978	-3.21358	-2.64168
TP63	-2.63033	-2.65044	-2.64038
KY	-2.96184	-2.25624	-2.60904
GJB6	-1.33537	-3.87831	-2.60684
ISLR2	-1.72705	-3.41138	-2.56922
EGR3	-1.22766	-3.90212	-2.56489
UGT1A3	-2.8975	-2.23206	-2.56478
C10orf99	-1.05565	-3.87589	-2.46577
EPHB6	-2.14434	-2.70841	-2.42638
RAB7B	-0.746967	-4.02354	-2.38525
WISP1	-1.39453	-3.3124	-2.35346
KRT13	-2.76916	-1.93586	-2.35251
SPAG17	-0.992752	-3.67281	-2.33278
KRT6C	-2.42794	-2.20713	-2.31754
TTYH2	-0.887741	-3.7434	-2.31557
VAV3	-2.01058	-2.60597	-2.30827
SLC2A1	-1.34642	-3.22764	-2.28703
SNAI2	-0.616292	-3.94908	-2.28268
RDH12	-1.84267	-2.69991	-2.27129
TG	-0.653243	-3.88688	-2.27006
HGF	-2.11029	-2.41796	-2.26412
KRT15	-1.62584	-2.8969	-2.26137
WNT10A	-1.91074	-2.58774	-2.24924
NTS	-2.41866	-2.06564	-2.24215
GJB2	-1.52745	-2.88908	-2.20827
ADH7	-2.95532	-1.45525	-2.20529
KCNIP4-IT1	-2.95888	-1.4411	-2.19999
ARHGAP22	-1.25142	-3.14811	-2.19977
PPP2R2B	-1.86797	-2.48652	-2.17725
SMIM2-AS1	-2.79573	-1.54534	-2.17053
DST	-1.45331	-2.86298	-2.15814
CAV1	-0.587124	-3.72685	-2.15699
SYNPO	-0.548143	-3.75024	-2.14919
ITGAM	-1.58649	-2.71074	-2.14862
GHR	-1.90562	-2.36757	-2.1366
LOC101927686	-1.33078	-2.92661	-2.1287
DKK3	-1.07788	-3.16243	-2.12015
FOXN1	-1.25763	-2.98064	-2.11914
MYLK	-2.14822	-2.02455	-2.08638
SLC40A1	-2.46483	-1.70733	-2.08608
THEM5	-2.10328	-2.06666	-2.08497
CYGB	-2.09728	-2.07137	-2.08432
LOC101928100	-1.63799	-2.52521	-2.0816
CERS3	-1.18408	-2.97452	-2.0793
LINC00885	-1.78653	-2.36858	-2.07755
PCK1	1.54477	-5.66892	-2.06207
PFKFB4	-1.21655	-2.89646	-2.05651
TMEM45A	-1.18237	-2.92577	-2.05407
TGM3	-2.26014	-1.84414	-2.05214
TRPV6	-1.67312	-2.41521	-2.04417
KRT10	-1.19863	-2.87364	-2.03614
FAM83A	-1.0564	-2.9887	-2.02255
PLAT	-0.902394	-3.13514	-2.01877
UCN2	-1.61118	-2.42125	-2.01622
ANXA8	-0.997082	-3.01625	-2.00666
BAALC	-1.29576	-2.70998	-2.00287
LOC100129203	-1.63453	-2.36839	-2.00146
KRT42P	-1.49415	-2.50862	-2.00138
TCAF2	-1.62705	-2.3663	-1.99668
MT1X	-0.860194	-3.12277	-1.99148
SLC47A2	-1.63078	-2.32593	-1.97836
USH1G	-0.9872	-2.95212	-1.96966
ADAD2	-1.41695	-2.47219	-1.94457
KRT77	-0.730894	-3.1375	-1.9342
RNF217-AS1	-1.5161	-2.34408	-1.93009
APCDD1	-2.67135	-1.18582	-1.92858
ARHGAP24	-1.02051	-2.82873	-1.92462
FSTL4	-2.11263	-1.7295	-1.92107
TMPRSS11F	-1.51447	-2.31802	-1.91624
SOCS2	-1.16393	-2.64741	-1.90567
CARD16	-1.6795	-2.11413	-1.89681
ACP5	-0.649817	-3.1417	-1.89576
LOC100996251	-1.9956	-1.7406	-1.8681
GS1-279B7.1	-1.8821	-1.81117	-1.84664
BCL11B	-2.19288	-1.50039	-1.84663
LPAR3	-0.574887	-3.11531	-1.8451
ANXA8L1	-1.12979	-2.54905	-1.83942
DUSP9	-0.684033	-2.99086	-1.83745
WNT3A	-1.34535	-2.30948	-1.82742
FAM227A	-1.75044	-1.9039	-1.82717
FAM212A	-0.859309	-2.76838	-1.81385
AHNAK2	-0.834926	-2.76944	-1.80218
COL27A1	-0.923641	-2.6634	-1.79352
SERPINB3	-1.16918	-2.41236	-1.79077
DSC3	-1.47753	-2.08407	-1.7808
PLB1	-0.775532	-2.73794	-1.75673
DIRC3	-1.86483	-1.63521	-1.75002
PCSK1	-1.17109	-2.32648	-1.74878
GPLD1	-1.36744	-2.11513	-1.74129
CYP24A1	-1.24027	-2.23666	-1.73847
LOC344887	-1.63763	-1.82026	-1.72895
EGR2	-0.614777	-2.83032	-1.72255
ERG	-1.15513	-2.28404	-1.71959
SLITRK6	-1.32879	-2.10782	-1.7183
MSMB	-0.801838	-2.6219	-1.71187
FAM83H-AS1	-2.16618	-1.25448	-1.71033
TYMP	-1.27202	-2.13401	-1.70301
GRAMD2	-1.91799	-1.46706	-1.69253
THEG	-1.35659	-1.96703	-1.66181
AKR1C3	-1.27538	-2.04702	-1.6612
MIR210HG	-1.22592	-2.09183	-1.65887
MLLT6	-1.64415	-1.66811	-1.65613
MIR205HG	-1.18114	-2.11736	-1.64925
SNCA	-0.799669	-2.49326	-1.64646
FAM181B	-1.1773	-2.09664	-1.63697
NLRX1	-1.94124	-1.33244	-1.63684
SLC34A1	-1.37838	-1.89288	-1.63563
TNC	-0.875296	-2.39506	-1.63518
SESN3	-0.876133	-2.35537	-1.61575
VWA5A	-1.2132	-1.97706	-1.59513
EDARADD	-1.59889	-1.59009	-1.59449
AJUBA	-1.52347	-1.65987	-1.59167
IL20RB	-1.04665	-2.12251	-1.58458
RFX2	-0.944289	-2.21283	-1.57856
PDZK1IP1	1.08937	-4.24345	-1.57704
HCAR3	-1.44468	-1.7089	-1.57679
PRR5L	-1.62896	-1.52043	-1.5747
KRT6B	-1.3247	-1.79985	-1.56227
ZNF395	-1.50847	-1.60994	-1.5592
GJA1	-0.800101	-2.31169	-1.5559
AKAP6	-1.60079	-1.47458	-1.53768
BNIP3	-1.03952	-2.02786	-1.53369
SDR9C7	-1.54185	-1.49049	-1.51617
MOB3A	-1.4061	-1.62425	-1.51517
TGM1	-1.33283	-1.68328	-1.50806
COL7A1	-0.593621	-2.41517	-1.5044
TET1	-0.902674	-2.09187	-1.49727
MIR205	-1.52248	-1.47036	-1.49642
DSC1	-1.45218	-1.53424	-1.49321
CDH6	-2.32446	-0.661213	-1.49284
HES2	-0.621908	-2.36296	-1.49243
PLA2G4E-AS1	-1.40572	-1.57124	-1.48848
LMO1	-1.69864	-1.2649	-1.48177
LOC100505736	-1.60678	-1.35494	-1.48086
OR7E91P	-1.6253	-1.33428	-1.47979
RASSF9	-1.32931	-1.62853	-1.47892
PCYT1B	-1.77712	-1.17619	-1.47666
LTB4R	-1.04413	-1.90533	-1.47473
SLC22A23	-1.07831	-1.84765	-1.46298
CISH	-0.77864	-2.14488	-1.46176
WNT5A	-1.23172	-1.68963	-1.46067
WNT4	-0.605851	-2.30717	-1.45651
DSG1	-2.40034	-0.509612	-1.45498
EGFR	-1.39698	-1.50379	-1.45038
PLTP	-0.65561	-2.21001	-1.43281
EMILIN3	-1.86988	-0.987753	-1.42882
SAMD5	-0.74375	-2.11301	-1.42838
DZIP1L	-1.68968	-1.16258	-1.42613
LTB4R2	-1.20662	-1.644	-1.42531
IRX6	-1.46228	-1.38809	-1.42519
PRR9	-1.47796	-1.37099	-1.42447
ARNT2	-0.944213	-1.89932	-1.42177
LINC00578	-1.50988	-1.29442	-1.40215
GJA3	-0.527863	-2.27292	-1.40039
PLA2G4E	-1.58774	-1.2118	-1.39977
KIRREL	-1.3609	-1.43778	-1.39934
ZMYND8	-1.83756	-0.958063	-1.39781
CEP19	-2.12525	-0.661056	-1.39315
LOC100506990	-1.2862	-1.46656	-1.37638
DLK2	-0.895315	-1.85441	-1.37486
KCNH1	-1.87647	-0.863932	-1.3702
CAPNS2	-1.75252	-0.973689	-1.3631
MYO1B	-1.02432	-1.6983	-1.36131
UAP1L1	-1.03269	-1.68695	-1.35982
NOS1	-0.781278	-1.93719	-1.35923
ANKRD29	-1.19847	-1.51806	-1.35826
ZNF846	-1.59205	-1.11509	-1.35357
SDK2	-0.819701	-1.88316	-1.35143
CALML3	-1.5406	-1.1549	-1.34775
RNF212B	-1.70735	-0.976478	-1.34191
GDNF-AS1	-1.17553	-1.50243	-1.33898
ANKRD35	-1.28125	-1.39566	-1.33846
LOC100130691	-1.37882	-1.29776	-1.33829
LINC01137	-0.809769	-1.8658	-1.33779
SLC10A6	-1.21812	-1.45227	-1.3352
B3GALT5	-1.39097	-1.27494	-1.33296
ZFHX2	-1.91997	-0.741464	-1.33071
LY6D	-1.01848	-1.64134	-1.32991
NUAK2	-1.27414	-1.37565	-1.3249
MR1	-0.730746	-1.91651	-1.32363
C2orf81	-1.25624	-1.37758	-1.31691
SLC15A1	-1.11358	-1.51795	-1.31577
IMPA2	-1.06868	-1.56206	-1.31537
CROT	-1.67345	-0.941932	-1.30769
FAM13A	-0.665674	-1.93932	-1.3025
KSR2	-1.74212	-0.859471	-1.30079
CHST2	-0.804982	-1.7903	-1.29764
CCDC3	-0.681112	-1.89976	-1.29044
JHDM1D-AS1	-0.877341	-1.69957	-1.28845
DHRS3	-0.5957	-1.98037	-1.28804
RTN1	-1.22046	-1.35467	-1.28756
TNS3	-0.82072	-1.75229	-1.2865
SLC44A5	-1.38843	-1.17454	-1.28149
NCK1-AS1	-1.53538	-1.02075	-1.27807
GSTM1	-1.34745	-1.18575	-1.2666
C20orf194	-0.933242	-1.59116	-1.2622
BBS4	-1.40768	-1.10511	-1.25639
LINC01410	-1.57493	-0.92017	-1.24755
KCNQ5	-1.62132	-0.87085	-1.24609
IL6R	0.727158	-3.21227	-1.24255
TTC30A	-1.68808	-0.790397	-1.23924
DNAH11	-0.942137	-1.53442	-1.23828
RPGRIP1L	-1.6758	-0.796841	-1.23632
PFKP	-0.903626	-1.56584	-1.23473
AK4	-1.16453	-1.30191	-1.23322
PDK1	-0.824994	-1.6293	-1.22714
KCNMA1	-1.36082	-1.09045	-1.22563
SNX31	-1.53834	-0.878368	-1.20835
CBR1	-1.13171	-1.27934	-1.20552
PTAFR	0.536135	-2.94553	-1.2047
GAL3ST4	-0.60515	-1.80238	-1.20376
DYNC2H1	-1.41752	-0.987413	-1.20247
INSIG2	-0.783079	-1.61104	-1.19706
MIPEP	-1.74942	-0.643307	-1.19637
DQX1	-0.972676	-1.41998	-1.19633
ACKR3	-1.16466	-1.21398	-1.18932
RIMKLA	-1.50963	-0.865423	-1.18753
GYS1	-1.25356	-1.12078	-1.18717
LDHA	-1.14236	-1.22489	-1.18362
HOXC13-AS	-1.59254	-0.774256	-1.1834
KRT6A	-0.792688	-1.57089	-1.18179
FAM13A-AS1	-1.21032	-1.15315	-1.18174
EGLN1	-1.48851	-0.873529	-1.18102
PDK3	-1.24754	-1.113	-1.18027
FZD6	-1.07321	-1.28147	-1.17734
WDR72	-1.29611	-1.05683	-1.17647
ITGB4	-0.815296	-1.53237	-1.17383
HLF	-0.780288	-1.55684	-1.16856
IQCJ-SCHIP1-AS1	-0.720966	-1.58733	-1.15415
PLXDC2	-1.34815	-0.957351	-1.15275
SLC7A8	-0.986278	-1.31096	-1.14862
LOC102723354	-0.756188	-1.5281	-1.14214
LYRM7	-1.69213	-0.591358	-1.14174
TENM4	-1.54239	-0.715128	-1.12876
CKMT1B	-0.908483	-1.34815	-1.12832
MSRB1	-1.58689	-0.666343	-1.12662
TLDC1	-0.595507	-1.65434	-1.12492
SEMA6D	-1.67231	-0.577506	-1.12491
ASCL2	-1.06323	-1.17895	-1.12109
ARHGAP23	-0.848644	-1.38043	-1.11454
SERPINB13	-1.56964	-0.659028	-1.11433
EDN1	-0.607258	-1.61761	-1.11244
MCF2L	-1.28757	-0.933899	-1.11074
KIF26A	-1.38704	-0.828329	-1.10768
EGFR-AS1	-1.01129	-1.2023	-1.10679
GDNF	-1.12381	-1.0888	-1.1063
PRICKLE2	-1.21296	-0.996988	-1.10498
SYNE1	-1.29045	-0.917361	-1.10391
TTC22	-0.790248	-1.413	-1.10163
PLIN4	-1.15148	-1.04588	-1.09868
CPT1A	-1.12836	-1.06578	-1.09707
CACNA1D	-1.15478	-1.0369	-1.09584
FHL2	0.560574	-2.71663	-1.07803
ABCC5	-0.794595	-1.3597	-1.07715
CFAP43	-1.05699	-1.09078	-1.07389
CALD1	-0.828331	-1.30078	-1.06456
CCDC146	-0.885391	-1.23808	-1.06174
KRT19	-0.820077	-1.30307	-1.06157
RMDN2	-1.12416	-0.998017	-1.06109
GPR153	-1.06895	-1.05133	-1.06014
ZNF546	-1.31206	-0.800796	-1.05643
RAB20	-1.05438	-1.05487	-1.05463
SLC39A11	-0.924994	-1.18219	-1.05359
FAM127C	-1.34825	-0.75842	-1.05333
AUTS2	-0.906508	-1.18487	-1.04569
LOC100507291	-1.10176	-0.981023	-1.04139
AGTRAP	-0.953353	-1.12871	-1.04103
APOL2	-1.08698	-0.994044	-1.04051
LOC400706	-1.2712	-0.807724	-1.03946
HOMEZ	-1.47016	-0.607034	-1.0386
MRAP2	-0.615662	-1.45555	-1.03561
DGKA	-0.890409	-1.17543	-1.03292
RAB11B-AS1	-1.10828	-0.954178	-1.03123
EPO	-0.965768	-1.09634	-1.03106
ATXN7L1	-1.43876	-0.607837	-1.0233
DAB1	-1.51826	-0.511781	-1.01502
PTPRZ1	-1.40163	-0.625996	-1.01381
KRTDAP	-1.05954	-0.96518	-1.01236
MPI	-1.09828	-0.923565	-1.01092
ATP10D	-1.19654	-0.823189	-1.00986
COPZ2	-1.34428	-0.667723	-1.006
SLC38A6	-1.15096	-0.858805	-1.00488
FANCE	-0.867717	-1.1323	-1.00001
TCTEX1D2	-1.35954	-0.638982	-0.999263
PAX8	0.813507	-2.80038	-0.993435
TSPAN18	-1.06485	-0.902519	-0.983685
DIXDC1	-0.807681	-1.14937	-0.978524
DNAH17	-1.05538	-0.895854	-0.975618
POU2F3	-0.990444	-0.959307	-0.974875
PAQR8	-1.23108	-0.7154	-0.97324
LINC00886	-1.12635	-0.816149	-0.971249
PFKM	-0.540534	-1.40074	-0.970639
TRPM8	-1.29905	-0.638776	-0.968915
MID1	-0.74911	-1.18246	-0.965784
LOC103344931	-0.810017	-1.12007	-0.965041
TRANK1	-0.620398	-1.30577	-0.963083
ABHD14A	-1.10861	-0.813919	-0.961262
AP3B2	-1.25662	-0.664818	-0.960719
BPNT1	-1.05867	-0.861204	-0.959938
WFDC5	-0.99033	-0.92906	-0.959695
BMP7	-0.66939	-1.24747	-0.958429
RHBDL2	-0.52683	-1.38642	-0.956626
TRIM66	-1.30945	-0.603715	-0.95658
NPBWR1	-0.995661	-0.911462	-0.953561
NCALD	-0.876206	-1.02683	-0.951518
FAM213A	-0.932532	-0.969449	-0.950991
MTSS1	-0.609735	-1.2911	-0.950419
SORL1	-1.08129	-0.817224	-0.949259
CENPP	-0.922076	-0.969241	-0.945659
DANT2	-0.743719	-1.14407	-0.943896
RUNDC3B	-1.02664	-0.859815	-0.943226
PGM1	-0.964905	-0.919192	-0.942048
LOC729732	-0.718334	-1.16134	-0.939839
PLEKHA1	-0.601523	-1.27742	-0.939472
HS2ST1	-1.28457	-0.591096	-0.937832
MYO5A	-1.05972	-0.812716	-0.936217
LOC100129550	-0.704282	-1.16293	-0.933605
HOXD10	-1.09718	-0.767377	-0.932281
NRXN2	-0.750218	-1.11419	-0.932203
WDR19	-1.07451	-0.788836	-0.931675
IFT140	-0.953916	-0.902932	-0.928424
LDLRAD4	-0.968104	-0.884436	-0.92627
NGFR	1.64639	-3.4982	-0.925904
STEAP3	-0.786656	-1.06002	-0.92334
ZRANB3	-1.20312	-0.641214	-0.922165
SPRR1A	-0.570419	-1.27274	-0.921579
SSBP2	-0.548562	-1.29431	-0.921434
JOSD2	-1.16901	-0.672872	-0.920941
EPPK1	-0.52208	-1.31499	-0.918535
KIAA1407	-1.1091	-0.727394	-0.918246
LDB1	-0.695534	-1.13986	-0.917697
TGIF2	-0.79785	-1.03535	-0.916601
MAPKBP1	-0.548885	-1.28212	-0.915502
MAP2K6	-1.02811	-0.802868	-0.91549
ATF6B	-1.03913	-0.782365	-0.910747
MEGF8	-0.862836	-0.956018	-0.909427
PVRL1	-0.724274	-1.0913	-0.907787
S100A2	-0.661414	-1.14517	-0.903291
PYCARD	-0.849394	-0.956651	-0.903022
CD36	-0.878454	-0.925394	-0.901924
LPIN3	-0.647029	-1.14937	-0.898201
PKP1	-0.570913	-1.22526	-0.898089
GTF2H5	-1.10359	-0.688051	-0.895822
SLFN5	-0.560973	-1.22747	-0.894222
CDH26	-0.93992	-0.845594	-0.892757
C1RL	-0.568279	-1.21406	-0.891167
PUS10	-0.62709	-1.15214	-0.889615
PHEX	-0.505708	-1.27047	-0.888091
ACOT11	-0.864928	-0.910133	-0.887531
ALDH3A1	-0.617271	-1.14849	-0.882883
DSG3	-0.58326	-1.18003	-0.881647
SLC35D3	-0.927069	-0.833092	-0.88008
FAXC	-1.02496	-0.735014	-0.879986
ANK3	-1.19156	-0.567176	-0.879366
DYNC2LI1	-0.944405	-0.801323	-0.872864
ZNF658	-1.15499	-0.589125	-0.872058
BRE	-1.20801	-0.534537	-0.871274
C14orf159	-1.12974	-0.610937	-0.870339
EDAR	-0.534762	-1.20064	-0.867701
TRERF1	-0.597568	-1.12757	-0.862568
HAUS6	-0.882604	-0.841641	-0.862122
KRT17	-0.854745	-0.868928	-0.861836
IFT81	-1.0823	-0.637299	-0.859798
CCDC39	-1.08607	-0.631212	-0.85864
NEFL	-1.13467	-0.581906	-0.858289
STPG1	-0.846818	-0.865291	-0.856054
S1PR5	-0.895519	-0.812952	-0.854236
HEY2	-0.822355	-0.884324	-0.853339
NHS	-0.823136	-0.876219	-0.849677
FAM161A	-1.04333	-0.652763	-0.848048
EVPLL	-0.985309	-0.70516	-0.845235
ORAI3	-0.960715	-0.71936	-0.840038
EPB41L1	-1.16744	-0.50709	-0.837267
BBS1	-0.957207	-0.713104	-0.835156
CKMT1A	-0.567526	-1.10111	-0.834318
ADAMTS5	-3.08184	1.41387	-0.833989
TMEM69	-0.917398	-0.74923	-0.833314
ADK	-0.797766	-0.868758	-0.833262
KIAA1217	-0.69266	-0.973757	-0.833209
PGAM1	-0.642456	-1.02166	-0.832056
CAAP1	-1.02033	-0.63809	-0.82921
DARS	-1.08553	-0.568985	-0.827258
FAM212B	-1.04725	-0.605168	-0.826209
GOLGA8B	-1.09896	-0.552374	-0.825666
ATP7A	-0.851827	-0.797595	-0.824711
KLHDC8B	0.620312	-2.26336	-0.821525
TNRC6C-AS1	-0.575681	-1.06658	-0.821129
KATNAL2	-1.045	-0.5854	-0.815198
BCKDHA	-0.510999	-1.11741	-0.814202
ABCA12	-0.816667	-0.807979	-0.812323
TRIM2	-0.718063	-0.905189	-0.811626
IVL	-0.998884	-0.620361	-0.809622
NRSN2-AS1	-0.939058	-0.664379	-0.801718
DBT	-1.08253	-0.518883	-0.800707
C21orf91	-0.539992	-1.06096	-0.800475
GBP2	1.43613	-3.03271	-0.798287
BOC	-0.981665	-0.613722	-0.797694
KIAA1143	-1.01148	-0.581227	-0.796355
SIRPA	-1.00585	-0.584167	-0.795007
NUAK1	-0.80567	-0.780525	-0.793097
LOC100128361	-0.753787	-0.827604	-0.790695
NCS1	-0.607861	-0.973295	-0.790578
AMPD3	-0.798989	-0.777411	-0.7882
UBE4B	-0.984079	-0.590773	-0.787426
TBC1D32	-1.05001	-0.523597	-0.786805
PEX3	-0.982439	-0.587581	-0.78501
MSRB2	-1.06273	-0.504314	-0.783521
CMIP	-0.520285	-1.04404	-0.782163
SMPDL3A	-0.737223	-0.821526	-0.779374
LOC100506258	-0.842574	-0.715671	-0.779123
DUOX1	-0.777074	-0.779879	-0.778476
PKM	-0.684667	-0.871268	-0.777968
LINC00963	-0.547568	-1.00713	-0.777349
TNFAIP8	-0.792594	-0.761746	-0.77717
SLC25A12	-0.912164	-0.64165	-0.776907
ADRB2	0.868574	-2.40861	-0.77002
LGALS8	-0.62229	-0.91537	-0.76883
DEGS1	-0.622802	-0.910267	-0.766534
NXPE3	-0.570522	-0.956676	-0.763599
PCMTD2	-0.89357	-0.623898	-0.758734
NEK11	-0.862972	-0.654436	-0.758704
ATG10	-0.972583	-0.543779	-0.758181
CCL28	-0.515188	-0.998013	-0.7566
ZHX3	-0.679577	-0.832907	-0.756242
ZMYM6NB	-0.749384	-0.761747	-0.755565
ZSCAN30	-1.00678	-0.503429	-0.755104
RSPH3	-0.581361	-0.928016	-0.754689
VWA8	-0.783161	-0.724961	-0.754061
CHURC1	-0.821585	-0.679445	-0.750515
ZNF204P	-0.858095	-0.641804	-0.74995
SAMD12	-0.909245	-0.587283	-0.748264
MBD5	-0.943502	-0.552945	-0.748224
ST6GALNAC2	-0.59983	-0.895263	-0.747547
VLDLR	-0.927773	-0.564121	-0.745947
IL11RA	-0.681518	-0.808906	-0.745212
ATP5G1	-0.87395	-0.615084	-0.744517
METTL8	-0.788416	-0.689192	-0.738804
BLMH	-0.791137	-0.684463	-0.7378
EBPL	-0.608822	-0.862488	-0.735655
HDAC1	-0.958329	-0.508952	-0.73364
C12orf79	-2.40184	0.934575	-0.733635
JADE2	-0.857991	-0.605744	-0.731868
CES4A	-0.691887	-0.771435	-0.731661
ZNF470	-0.832185	-0.630637	-0.731411
ARAP1	-0.51421	-0.947689	-0.730949
RAET1G	0.706448	-2.15974	-0.726644
IL11	-0.780814	-0.671486	-0.72615
CELSR1	-0.729694	-0.720546	-0.72512
PERP	-0.526589	-0.922036	-0.724312
GALNT18	-0.585655	-0.856046	-0.720851
TNNI1	-0.853444	-0.586995	-0.720219
SH3RF3	-0.529987	-0.904401	-0.717194
CNN1	-0.782532	-0.648602	-0.715567
DAB2IP	-0.533274	-0.890013	-0.711644
IARS2	-0.917998	-0.501621	-0.709809
CYB5R1	-0.713353	-0.705364	-0.709358
DOCK7	-0.892819	-0.525586	-0.709202
ENO1	-0.584942	-0.830642	-0.707792
LRRK1	-0.69195	-0.719225	-0.705587
WDR91	-0.823971	-0.5844	-0.704185
NME7	-0.859978	-0.543462	-0.70172
WDR60	-0.721755	-0.67311	-0.697432
MDGA1	-0.632948	-0.761726	-0.697337
MYCBP2	-0.791904	-0.59303	-0.692467
HERC3	-0.663525	-0.720457	-0.691991
EXOSC5	-0.806765	-0.572619	-0.689692
NRSN2	-0.870031	-0.506011	-0.688021
LINC01348	1.13079	-2.5053	-0.687255
DSP	-0.517249	-0.85595	-0.686599
PAQR7	-0.689409	-0.683191	-0.6863
TFDP2	-0.780217	-0.583126	-0.681672
FAM184B	-0.720381	-0.642593	-0.681487
CDK6	-0.658781	-0.70172	-0.68025
FLG	-0.595805	-0.759394	-0.6776
LIPA	-0.540879	-0.802247	-0.671563
TTC37	-0.802371	-0.522606	-0.662488
EFCAB7	-0.79975	-0.524918	-0.662334
LINC01547	-2.12333	0.799529	-0.661903
TRIT1	-0.563016	-0.756796	-0.659906
GSTM4	-0.59736	-0.719534	-0.658447
SLC9A3R1	-0.577909	-0.737716	-0.657813
SLC36A1	-0.603611	-0.709675	-0.656643
NPL	-0.578439	-0.727693	-0.653066
ATP8B2	-0.614805	-0.690638	-0.652722
PPARA	-0.592717	-0.703232	-0.647975
PLXNA2	-0.666593	-0.629002	-0.647798
CHST12	-0.602997	-0.679962	-0.64148
SLC39A6	-0.650408	-0.631651	-0.64103
LOC101929147	-0.755162	-0.525063	-0.640113
RNF141	-0.509279	-0.769214	-0.639247
SMIM10L2A	-0.579458	-0.698765	-0.639112
PRKACB	-0.744963	-0.533036	-0.639
ABCB6	-0.671766	-0.605079	-0.638422
LINC00476	-0.613584	-0.655415	-0.6345
IGSF3	-0.706677	-0.560261	-0.633469
DESI1	-0.711106	-0.547755	-0.62943
CORO2A	-0.679671	-0.579044	-0.629357
PAX8-AS1	1.03036	-2.2889	-0.629272
DSC2	-0.726125	-0.531811	-0.628968
KDM4B	-0.53082	-0.724445	-0.627632
CERK	-0.738184	-0.516429	-0.627306
NXN	-0.653875	-0.59982	-0.626847
YEATS2	-0.611846	-0.64051	-0.626178
IGIP	-0.71753	-0.532703	-0.625117
HOOK3	-0.638115	-0.609661	-0.623888
CGREF1	-0.574498	-0.666716	-0.620607
LPP	-0.55923	-0.677733	-0.618481
CTAGE5	-0.553105	-0.683073	-0.618089
SH2D2A	-0.642499	-0.589428	-0.615964
DNAL4	-0.666599	-0.564047	-0.615323
RTKN	-0.668291	-0.561439	-0.614865
PITX1	-0.589845	-0.635963	-0.612904
LDHB	-0.721976	-0.501436	-0.611706
OTUD6B-AS1	-0.67677	-0.544848	-0.610809
MGST2	-0.625415	-0.591406	-0.60841
EEF2K	-0.650665	-0.561398	-0.606031
ALDH3A2	-0.641309	-0.569794	-0.605551
FTO	-0.522391	-0.686752	-0.604571
CTDSPL	-0.639218	-0.565169	-0.602194
ETFB	-0.613471	-0.590434	-0.601952
MMP1	1.05788	-2.25028	-0.596198
IL1B	1.02344	-2.20974	-0.59315
MMP10	1.16945	-2.35531	-0.592929
SMYD3	-0.564585	-0.614623	-0.589604
ADD3	-0.6649	-0.513329	-0.589115
CFAP126	-0.537144	-0.640413	-0.588778
LAD1	-0.602697	-0.564865	-0.583781
HMGCL	-0.536929	-0.629526	-0.583228
BBS9	-0.53921	-0.625647	-0.582429
NFIX	-0.500084	-0.664053	-0.582068
INHBB	-0.552112	-0.608877	-0.580494
MICAL3	-0.502082	-0.65346	-0.577771
MITD1	-0.613746	-0.540234	-0.57699
ABCC1	-0.601062	-0.535055	-0.568058
LINC00319	0.961714	-2.09453	-0.566406
KIF3A	-0.52461	-0.607729	-0.566169
HEY1	0.610651	-1.74292	-0.566133
KDM4C	-0.500306	-0.627087	-0.563697
NMNAT3	-0.534871	-0.588579	-0.561725
PIK3C2B	-0.506788	-0.60913	-0.557959
CEBPZOS	-0.569298	-0.543389	-0.556344
VPS36	-0.563294	-0.546877	-0.555085
CAMK1G	1.49994	-2.58317	-0.541613
HELB	-0.500058	-0.581155	-0.540607
FADS6	0.884586	-1.96478	-0.540099
MAP3K8	0.67557	-1.75476	-0.539594
KIAA0319L	-0.570329	-0.507766	-0.539048
SPATS2	-0.542297	-0.511732	-0.527014
NDUFS2	-0.528991	-0.513939	-0.521465
KLK8	0.580498	-1.56424	-0.491872
SOX30	-1.52983	0.564422	-0.482706
RGCC	1.26468	-2.22288	-0.479098
TMEM40	0.519864	-1.4771	-0.478616
CYP4F3	0.770123	-1.6748	-0.452339
ENO2	0.510303	-1.38298	-0.436336
LOC101927284	-2.81172	1.98789	-0.411917
DUSP7	0.871766	-1.66862	-0.398429
DYRK3	0.754582	-1.54944	-0.397429
SCN4B	0.816189	-1.5968	-0.390304
LINC00673	0.556241	-1.33634	-0.390051
IL17RE	0.60465	-1.38179	-0.38857
LOC100130476	0.632999	-1.4051	-0.386048
NNAT	0.684092	-1.453	-0.384455
USP51	-1.50751	0.781555	-0.362978
NR4A1	0.815176	-1.53345	-0.359135
ITGA5	0.787118	-1.48487	-0.348874
STC1	1.31086	-2.00744	-0.348286
ERVMER34-1	-1.27024	0.578991	-0.345626
SOWAHC	0.710437	-1.3932	-0.341383
TMED10P1	-1.28793	0.617967	-0.334984
PCP4L1	0.980093	-1.64988	-0.334892
PTGS2	1.16459	-1.81652	-0.325966
HMBS	-1.1603	0.515144	-0.322577
PTCD2	-1.17248	0.528366	-0.322057
SLC5A10	0.504246	-1.12853	-0.31214
UROS	-1.24959	0.643363	-0.303115
ICAM5	0.954722	-1.54816	-0.296719
PTPRH	1.00672	-1.59822	-0.295748
NOV	0.595805	-1.18601	-0.295102
JUN	0.864111	-1.43709	-0.286491
SSPO	0.581112	-1.13779	-0.278338
ZBED6CL	-1.1867	0.632655	-0.277021
ETS2	0.840527	-1.36541	-0.262444
LIPT2	-1.32158	0.798443	-0.261566
PRKCA	0.676722	-1.19768	-0.26048
LAMB3	0.62744	-1.14408	-0.258319
PTPRG	-1.16346	0.655134	-0.254163
KRT9	-1.39356	0.889209	-0.252174
KIAA1614	0.655829	-1.13842	-0.241295
MIR31HG	0.825494	-1.29895	-0.236728
GK	-0.982197	0.509573	-0.236312
RRAS	0.965058	-1.42597	-0.230456
SOX6	-1.05046	0.592407	-0.229028
EPGN	0.939619	-1.39661	-0.228494
SOX7	1.1617	-1.61782	-0.228059
IRS1	0.627402	-1.08239	-0.227492
GPX8	0.722911	-1.1728	-0.224945
RAD51C	-0.963618	0.517838	-0.22289
SIK1	1.62217	-2.06548	-0.221654
THBS1	0.77194	-1.20507	-0.216564
EID3	1.39447	-1.81921	-0.21237
FEM1B	0.600687	-1.02492	-0.212117
HIST1H2BH	-1.19656	0.774582	-0.210991
TMPO-AS1	-1.07723	0.657727	-0.209752
TMEM62	-1.30614	0.89688	-0.204628
TIPARP	0.986585	-1.39363	-0.203524
SLC27A1	0.589789	-0.992425	-0.201318
HIST1H1B	-1.29685	0.905907	-0.195474
OXCT1	-0.974948	0.587381	-0.193784
FAM83G	0.707045	-1.08461	-0.188784
BCL10	0.691237	-1.06446	-0.186613
DLX6	-1.12138	0.760657	-0.180361
RDH10-AS1	0.711987	-1.07147	-0.179743
USP13	-1.37046	1.0127	-0.178879
PKDCC	-1.29328	0.937807	-0.177737
CAPN12	0.754829	-1.10781	-0.176491
CPE	0.504517	-0.857423	-0.176453
H2AFY2	-0.927362	0.595968	-0.165697
GNG12-AS1	0.725891	-1.05365	-0.163881
RTN4IP1	-0.884649	0.559195	-0.162727
BCO2	0.916787	-1.24204	-0.162626
NTN4	0.74938	-1.07222	-0.161419
DUSP5	0.534979	-0.850279	-0.15765
BCL11A	-1.44524	1.14903	-0.148106
ICK	-1.08791	0.794049	-0.146928
ERRFI1	1.04919	-1.34074	-0.145772
FEZF1-AS1	-1.02526	0.734951	-0.145153
MDM1	-0.872792	0.585033	-0.143879
CYP2C18	-1.18613	0.900121	-0.143002
SPARCL1	1.0391	-1.32278	-0.141842
FAM86C1	-1.11207	0.836026	-0.138024
SLC29A2	-0.835144	0.562878	-0.136133
DCHS1	-1.03224	0.768013	-0.132115
HS3ST5	-2.22952	1.96792	-0.130796
EFEMP1	0.867006	-1.12565	-0.12932
PRNP	0.721314	-0.979672	-0.129179
GCSAM	0.909434	-1.15913	-0.124848
IFITM3	0.573925	-0.823076	-0.124575
CDA	1.16156	-1.40845	-0.123445
ERI2	-0.830926	0.585355	-0.122786
WDR34	-0.833324	0.596692	-0.118316
MALAT1	0.600696	-0.836119	-0.117712
USP2	0.730741	-0.955172	-0.112215
MCIDAS	-0.920383	0.696015	-0.112184
TIRAP	-0.751959	0.530156	-0.110901
MVP	0.665807	-0.882735	-0.108464
PANK1	-1.04079	0.831624	-0.104583
DPYSL5	-0.722321	0.519772	-0.101275
ATHL1	0.623553	-0.826021	-0.101234
PPP4R1L	0.521349	-0.722858	-0.100755
SH3D19	-0.928208	0.734181	-0.0970136
RIOK3	0.533362	-0.723383	-0.0950108
AGA	-0.770241	0.580434	-0.0949035
LYPD6	-0.972401	0.783425	-0.0944881
ZNF561	0.585544	-0.766296	-0.0903761
PJA2	0.549722	-0.730138	-0.0902078
SFXN5	-0.812544	0.6331	-0.0897217
BRCA2	-0.684211	0.519122	-0.0825442
CEBPD	0.565003	-0.721772	-0.0783847
LOXL1-AS1	-0.715752	0.559262	-0.078245
SHC2	0.678638	-0.823151	-0.0722563
BTBD19	1.41294	-1.55241	-0.0697396
KLHL22	-0.82063	0.683671	-0.0684796
LOC648987	-0.885787	0.755758	-0.0650146
ADCK1	-0.728024	0.600876	-0.0635742
PLAU	1.05749	-1.18316	-0.0628348
PFKFB3	0.782453	-0.904125	-0.0608359
LOC101926935	-0.840074	0.723037	-0.0585186
HPGD	-0.86357	0.746966	-0.0583023
ATP2B4	0.520197	-0.627002	-0.0534026
UBE2L6	0.643309	-0.74981	-0.0532505
IZUMO4	0.944169	-1.04307	-0.049448
HIST2H2AB	-0.91859	0.829785	-0.0444027
LOC101929595	0.816821	-0.903791	-0.043485
CTIF	0.637459	-0.723449	-0.0429952
PDLIM7	0.560242	-0.645206	-0.042482
RHNO1	-0.799093	0.714944	-0.0420748
OSGIN1	0.54349	-0.624596	-0.0405529
MYBL1	-0.663382	0.590474	-0.036454
HIST1H3D	-0.977736	0.905013	-0.0363614
ASF1B	-0.592721	0.523094	-0.0348134
PRIM2	-1.02139	0.953451	-0.0339712
CSRNP1	1.98833	-2.05208	-0.0318747
CREG2	1.01576	-1.07843	-0.0313358
CXorf57	-0.721387	0.659471	-0.030958
PLCXD2	0.776222	-0.837649	-0.0307132
HERC6	-0.78457	0.724667	-0.0299517
METTL21B	0.700541	-0.757544	-0.0285017
KLHL21	0.561197	-0.61492	-0.0268616
CLU	1.24617	-1.29776	-0.0257947
ZWILCH	-0.606525	0.55653	-0.0249976
HIST1H3B	-0.903751	0.85511	-0.0243205
DLX6-AS1	-0.684927	0.641205	-0.0218611
POLR1D	0.623873	-0.666311	-0.0212192
OIP5	-0.815808	0.773582	-0.0211132
PXN	0.607631	-0.64662	-0.0194945
PLCB4	-0.797825	0.763751	-0.0170371
FTL	0.944952	-0.977852	-0.0164504
TTF2	-0.544485	0.515696	-0.0143944
PER2	0.941952	-0.968522	-0.0132851
LMNB1	-0.796101	0.769787	-0.013157
UHRF1	-0.682513	0.657396	-0.0125583
DDX60	-0.54264	0.524924	-0.00885828
AGRN	0.527375	-0.542047	-0.00733601
COLGALT2	-0.749918	0.736276	-0.00682118
TMEM98	-0.809717	0.797008	-0.00635481
BTN3A1	0.651127	-0.660853	-0.00486289
ITSN1	-0.709152	0.699663	-0.00474443
SMIM5	-0.527791	0.52131	-0.00324042
NABP1	0.808516	-0.814588	-0.00303565
PDZD2	0.733818	-0.738741	-0.00246128
TCAM1P	-0.676437	0.6727	-0.00186854
PXDC1	0.527273	-0.525816	0.00072812
ALOX12	-0.551217	0.553284	0.00103363
CHMP1B	0.509707	-0.503074	0.00331639
CEP78	-0.549393	0.558611	0.00460899
DIRAS2	1.39852	-1.38523	0.00664393
CPNE2	-0.556126	0.574039	0.00895689
KLF10	0.677244	-0.654315	0.0114645
SERTAD1	1.1777	-1.15388	0.0119106
TMEM246	-0.576977	0.601512	0.0122676
ATP6V0E2	-0.535677	0.562042	0.0131822
ARSB	-0.553786	0.585584	0.0158991
ACAT2	-0.648949	0.681702	0.0163766
HIST1H1C	-0.700276	0.735445	0.0175844
KLHL6	-1.11026	1.14553	0.0176383
EBLN3	0.629402	-0.59298	0.018211
LRRFIP1	0.587405	-0.547164	0.0201206
NEK1	-0.557627	0.598898	0.0206356
MYC	1.36855	-1.32546	0.0215413
CRISPLD1	-0.682424	0.725547	0.0215613
SKIDA1	-1.11042	1.15434	0.0219596
NLGN2	0.611486	-0.56702	0.0222328
PSEN2	-0.795106	0.84008	0.0224869
KNOP1	-0.588638	0.635507	0.0234342
ZNF488	0.75124	-0.702618	0.0243107
PHF24	-0.512107	0.5646	0.0262467
ENGASE	0.608302	-0.555631	0.0263354
TGFBI	1.16745	-1.11424	0.0266053
C14orf80	-0.57518	0.630753	0.0277865
ADAT1	-0.546297	0.602148	0.0279256
IRF6	0.918341	-0.861323	0.0285093
HIST1H2BF	-1.02211	1.08088	0.0293848
AATK	0.916853	-0.857332	0.0297605
CASD1	-0.525911	0.590014	0.0320518
SLC4A7	0.858978	-0.793325	0.0328264
ARRDC4	1.0395	-0.972026	0.0337387
CDKN2C	-0.551947	0.622176	0.0351145
NEO1	-0.698985	0.771806	0.0364102
RNF19A	0.596816	-0.5235	0.0366583
SLC39A10	-0.54419	0.623157	0.0394831
SRPX2	1.42941	-1.34855	0.0404299
SPDL1	-0.671055	0.752855	0.0409
HILPDA	1.1626	-1.07639	0.0431069
FOXP1	-0.800071	0.889455	0.0446919
TDRD5	-0.752413	0.846865	0.0472259
ITPRIP	1.1092	-1.01374	0.0477305
CYP4F12	0.842385	-0.746783	0.0478009
IRF2BP2	0.667437	-0.570081	0.0486778
SAMHD1	-0.549461	0.647526	0.0490327
NIPAL1	1.14016	-1.04037	0.0498974
TFE3	0.71615	-0.614056	0.051047
HAS3	0.615535	-0.513259	0.0511382
CDK17	0.665486	-0.550489	0.0574986
HEATR3	-0.836229	0.953237	0.0585043
HIST1H4E	-0.57656	0.697217	0.0603284
SERPINB8	0.903425	-0.76725	0.0680876
RNF43	-0.536605	0.673273	0.0683339
MELK	-0.546447	0.683297	0.0684248
ARHGEF39	-0.623341	0.765077	0.070868
LOC100506548	0.713282	-0.569501	0.0718904
PLK3	1.03264	-0.886847	0.072897
HIST1H4C	-0.534203	0.681163	0.0734801
RAD51	-0.593259	0.740315	0.0735283
SMTN	0.921505	-0.769453	0.0760258
DCST2	0.741149	-0.583576	0.0787864
ARMC6	-0.523063	0.690275	0.0836061
HIST1H2BL	-0.624765	0.794278	0.0847567
RHOBTB1	-0.850803	1.02379	0.0864958
RAD51B	-0.564974	0.738365	0.0866956
HIST1H3F	-0.845386	1.02848	0.0915454
CRABP2	1.16489	-0.980956	0.0919682
MCL1	0.756697	-0.571113	0.092792
GABARAPL1	0.901144	-0.709664	0.0957399
ERO1B	0.761987	-0.570425	0.0957807
KDELC2	-0.542205	0.735847	0.096821
HIST2H2BF	-0.673358	0.87805	0.102346
ZBED6	0.918568	-0.712786	0.102891
GUCY1A3	-1.15907	1.36635	0.103638
PRLR	-0.793796	1.00164	0.10392
HIST1H1D	-1.05545	1.26893	0.106739
SMARCD3	0.981677	-0.7573	0.112189
PGLYRP4	1.16003	-0.926504	0.116761
CUL7	0.822834	-0.582807	0.120013
SAMD4A	1.72418	-1.47977	0.122202
MAFA	0.883056	-0.632015	0.12552
PCAT6	1.0669	-0.812414	0.127241
SEMA6A	-0.783609	1.04237	0.12938
STKLD1	0.985903	-0.724579	0.130662
CCNL1	0.984277	-0.720075	0.132101
SAMD8	0.85019	-0.551796	0.149197
TNNT2	1.51432	-1.21467	0.149824
CPM	1.09258	-0.78742	0.152582
PCDH12	1.20874	-0.902582	0.153081
CCL26	1.1948	-0.886104	0.154348
DTX4	-0.609408	0.928499	0.159546
TBX2	-0.585584	0.906108	0.160262
HIST2H2AC	-0.519202	0.841635	0.161216
MIDN	0.919818	-0.594235	0.162792
FAM127A	0.869926	-0.542394	0.163766
CD59	0.92606	-0.596451	0.164805
HIST1H4D	-0.530787	0.86047	0.164842
DZIP3	-0.54776	0.877886	0.165063
HIST1H2AI	-0.562667	0.893645	0.165489
HMOX1	0.917046	-0.581789	0.167628
HIST1H2AE	-0.5512	0.886842	0.167821
PMEPA1	1.3155	-0.978897	0.168301
ACPT	0.96267	-0.625272	0.168699
FOS	1.83084	-1.47407	0.178384
STEAP1	-0.507244	0.872651	0.182704
CSGALNACT1	-1.2116	1.57808	0.183237
FAM210B	-0.892209	1.26961	0.188702
BCL2	-0.691132	1.07367	0.19127
COQ2	-0.600705	0.987727	0.193511
GPR137C	-0.739165	1.1404	0.200619
TCTEX1D4	1.67265	-1.27019	0.201231
HMGB3	-0.506208	0.909612	0.201702
CYP2U1	-0.891555	1.30012	0.204283
CNKSR2	-0.967747	1.38129	0.206773
CACNA2D1	-0.962075	1.37851	0.208216
THRA	0.926896	-0.510271	0.208313
FOSL1	1.65286	-1.2326	0.210127
FOXO6	1.01839	-0.584374	0.217007
SCN8A	-0.552231	0.988483	0.218126
ZNF48	-0.835734	1.27936	0.221813
ABCC4	-0.534352	0.999504	0.232576
TMEM159	1.07306	-0.597858	0.2376
FEZF1	-0.656953	1.1385	0.240772
SYTL5	-0.755791	1.24983	0.247019
GJB3	1.22804	-0.728821	0.249611
VIPR1	-0.597971	1.09935	0.250688
ADAM23	-0.811738	1.31344	0.250851
PIM2	1.02612	-0.515739	0.255192
HIST1H4I	-0.573504	1.08682	0.256658
NR4A3	1.85513	-1.3078	0.273667
PLK2	1.33285	-0.784402	0.274225
CDH2	-0.953932	1.50371	0.274887
ECE2	1.06237	-0.512492	0.274939
EML5	-0.544646	1.09915	0.27725
HBP1	1.12066	-0.563275	0.278692
C11orf91	2.15383	-1.5964	0.278712
KIAA1456	-0.783942	1.34244	0.27925
TMEM74B	1.33169	-0.770063	0.280812
HIST1H2AB	-0.547809	1.11059	0.281392
SLC16A9	-0.761575	1.32731	0.282865
C3orf52	1.317	-0.750129	0.283437
CPAMD8	1.38058	-0.804133	0.288221
FETUB	-1.07925	1.66988	0.295314
IER5L	1.28766	-0.692704	0.297477
SOX2-OT	-1.20435	1.8005	0.298077
DUSP1	1.43245	-0.81712	0.307666
HIST1H2AL	-0.63441	1.26683	0.316207
ADCY1	-0.594527	1.24423	0.324853
ADAMTSL4-AS1	1.61891	-0.925982	0.346465
SH2D5	2.35836	-1.61563	0.371366
BMP2	1.32222	-0.577021	0.372597
IER5	1.32534	-0.556754	0.384291
B3GNT5	1.36714	-0.580429	0.393355
IRS2	1.60944	-0.813942	0.39775
TMEM263	1.5831	-0.785408	0.398847
EPHA2	1.41795	-0.60538	0.406286
CYR61	1.56468	-0.735757	0.414462
GSTA1	-0.527733	1.37536	0.423814
KCNQ1OT1	1.45137	-0.537123	0.457125
ATF3	1.87997	-0.929964	0.475004
NR1D1	1.51772	-0.556169	0.480776
SOX2	-0.560952	1.52837	0.48371
TRIB1	1.58881	-0.585773	0.50152
NUP35	0.53053	0.511981	0.521255
UPF1	0.518939	0.528886	0.523913
PHLPP2	0.54903	0.521669	0.535349
TUBB4B	0.556553	0.522651	0.539602
SATB2	0.505069	0.575848	0.540459
SLC9A4	-1.08088	2.17224	0.545677
TNPO2	0.529706	0.562885	0.546295
S100A6	0.534031	0.562584	0.548308
RANGAP1	0.546373	0.568123	0.557248
EXOSC6	0.579454	0.54406	0.561757
EPC2	0.573635	0.55748	0.565557
RRP7BP	0.526557	0.607561	0.567059
ZNF330	0.600852	0.538948	0.5699
EPB41	0.569607	0.570931	0.570269
GKAP1	0.596153	0.5454	0.570777
ARRDC3	0.582253	0.559784	0.571019
FRAT2	0.551238	0.592951	0.572094
DDI2	0.620685	0.527022	0.573854
PVRL3	0.587861	0.570306	0.579083
METTL16	0.510629	0.64847	0.579549
GDE1	0.609298	0.563671	0.586485
DCXR	0.656217	0.517174	0.586695
EN2	0.610678	0.563718	0.587198
MON1A	0.568499	0.609901	0.5892
PER1	2.0286	-0.841737	0.593429
ILF3-AS1	0.64963	0.545784	0.597707
SPAG5	0.546119	0.662401	0.60426
HABP4	0.563562	0.645484	0.604523
CKAP2L	0.627651	0.589148	0.6084
NOP2	0.63959	0.57954	0.609565
CTCF	0.601984	0.617915	0.60995
POC1B	0.578099	0.641954	0.610027
TOP2A	0.604431	0.616722	0.610576
SURF6	0.721925	0.504577	0.613251
MSX2	0.680365	0.54644	0.613403
DLGAP1-AS2	0.639773	0.594262	0.617018
S100A13	0.686905	0.55	0.618453
ZDHHC18	0.725834	0.517966	0.6219
ROR2	0.578571	0.666914	0.622743
KIF14	0.541436	0.706374	0.623905
RMRP	0.739691	0.509894	0.624793
CTU2	0.655121	0.596113	0.625617
AURKB	0.503913	0.747811	0.625862
UTP15	0.63602	0.61837	0.627195
INCENP	0.665812	0.597187	0.631499
MGST3	0.671393	0.601638	0.636516
SHCBP1	0.658416	0.614869	0.636642
NRF1	0.685568	0.592197	0.638882
CFAP20	0.758002	0.520283	0.639142
TTC9	0.672072	0.609935	0.641003
TMEM2	0.675148	0.612774	0.643961
GRWD1	0.781866	0.508342	0.645104
SP2	0.720658	0.571553	0.646106
MEIOB	0.789588	0.507907	0.648748
SH3RF1	0.609436	0.689136	0.649286
C2orf69	0.710117	0.590187	0.650152
SPINT1	0.786884	0.51347	0.650177
SPAG1	0.801182	0.505055	0.653118
FBXO5	0.606664	0.701893	0.654279
GDA	0.537366	0.772132	0.654749
AVPI1	1.86198	-0.550537	0.655721
BORA	0.686591	0.628028	0.657309
EBP	0.749233	0.5739	0.661567
UBALD2	0.821157	0.502282	0.66172
G2E3	0.696238	0.64171	0.668974
CHD1	0.832598	0.505461	0.66903
GSG2	0.561691	0.777995	0.669843
TMSB4X	0.682955	0.660306	0.671631
LYNX1	0.833245	0.510201	0.671723
SOX21	-0.665744	2.01019	0.672222
AP1S3	0.534842	0.814068	0.674455
ARHGAP12	0.710923	0.639602	0.675262
LGR4	0.763508	0.590302	0.676905
MAPRE2	0.726653	0.628739	0.677696
RHOB	2.1157	-0.753877	0.680909
MYO15B	0.741917	0.623696	0.682807
JMY	0.706126	0.661426	0.683776
FASN	0.794092	0.581651	0.687871
MB21D1	0.564202	0.814313	0.689257
TTK	0.778269	0.600398	0.689333
PUS1	0.799411	0.579959	0.689685
MTCL1	0.515027	0.866189	0.690608
RFK	0.631369	0.750999	0.691184
PYCR1	0.711265	0.671932	0.691599
COA7	0.701207	0.687831	0.694519
SCARNA9	0.716486	0.675593	0.696039
PPM1D	0.711115	0.682659	0.696887
CKAP4	0.551057	0.852892	0.701975
PRKCDBP	-0.562538	1.9773	0.707381
HES1	0.587097	0.827751	0.707424
WDR74	0.686089	0.729158	0.707623
SH3BGRL2	0.763312	0.656114	0.709713
FAM208B	0.754889	0.666418	0.710654
GPC3	0.802803	0.618614	0.710709
KIF2C	0.787868	0.634142	0.711005
CDCA8	0.683044	0.739362	0.711203
RIPK2	0.733039	0.689449	0.711244
SOCS6	0.821475	0.609068	0.715271
PSRC1	0.688955	0.741673	0.715314
FGFRL1	0.6062	0.824732	0.715466
PRSS8	0.888004	0.545424	0.716714
EPHA7	-1.0475	2.4833	0.717897
WWC1	0.598366	0.838888	0.718627
GCNT3	0.565346	0.875164	0.720255
TRMT61A	0.938044	0.503105	0.720575
TDRP	0.655626	0.78708	0.721353
AARS	0.703667	0.745718	0.724693
TET3	0.741188	0.71353	0.727359
ADIRF	0.704363	0.753193	0.728778
CCNB2	0.533664	0.92601	0.729837
RAPGEF2	0.54063	0.91951	0.73007
LGALS9	0.729548	0.731084	0.730316
CLDN7	0.652767	0.815341	0.734054
VSIG10L	0.639833	0.831576	0.735704
CMC2	0.765163	0.706881	0.736022
LRRC8E	0.915569	0.556479	0.736024
NLRC5	0.687254	0.786845	0.73705
MEOX1	-1.60689	3.08673	0.739923
CXXC5	0.861916	0.618125	0.740021
CCDC112	0.660088	0.820444	0.740266
ISYNA1	0.677191	0.811173	0.744182
KIF23	0.69698	0.800174	0.748577
SERPINB7	0.78179	0.717011	0.749401
ZNF365	0.617428	0.883359	0.750394
FAM160A2	0.683185	0.818047	0.750616
SLC25A33	0.982321	0.523839	0.75308
KLF9	0.708137	0.804789	0.756463
CCNA2	0.608221	0.906365	0.757293
CENPN	0.632971	0.886842	0.759906
SPRR2D	0.70511	0.815379	0.760245
KIF20A	0.627293	0.893925	0.760609
PLCE1	0.833551	0.689886	0.761719
DBF4	0.705863	0.818101	0.761982
RACGAP1	0.795985	0.734166	0.765076
ZNF593	0.919358	0.611456	0.765407
ST3GAL4	0.666004	0.868435	0.767219
ATP2A3	0.883016	0.652889	0.767952
SNORA74B	0.904396	0.634647	0.769521
LTBP3	0.900028	0.639102	0.769565
FYN	1.00164	0.539969	0.770805
OPN3	0.62997	0.912705	0.771338
NRIP1	0.975165	0.573853	0.774509
MVD	0.762212	0.78894	0.775576
HJURP	0.602129	0.952061	0.777095
SMG7	0.734066	0.823007	0.778536
YARS	1.00902	0.551635	0.78033
MARS	0.738455	0.822241	0.780348
OAS1	0.775292	0.786915	0.781104
TPX2	0.691114	0.877603	0.784358
NUFIP1	0.833578	0.736823	0.7852
LOC100129917	1.03905	0.536068	0.787558
RASSF1	0.961217	0.615789	0.788503
LGALS3	0.732943	0.844536	0.78874
SYDE2	0.780303	0.809026	0.794664
HIST3H2A	0.684514	0.907326	0.79592
DEAF1	0.973112	0.619351	0.796232
TACC3	0.639055	0.953869	0.796462
TRMT6	0.807993	0.785464	0.796729
ATG16L1	1.04035	0.554166	0.797257
PLAGL2	0.951412	0.643702	0.797557
SLC30A3	0.994586	0.601849	0.798217
RAB3IL1	0.81125	0.787188	0.799219
GABPB1	0.821123	0.782365	0.801744
PRR11	0.706623	0.898059	0.802341
MYO5B	0.766019	0.843006	0.804512
AUNIP	0.690822	0.922036	0.806429
SSSCA1	1.08347	0.531241	0.807356
PAQR3	0.998152	0.616774	0.807463
CLIC4	0.689138	0.927291	0.808215
CYP51A1	0.781779	0.836447	0.809113
ING1	1.11221	0.5089	0.810554
HOXC10	0.833025	0.790918	0.811971
AIF1L	0.503078	1.12211	0.812593
CHKA	0.910978	0.714782	0.81288
MEX3B	0.624078	1.01265	0.818363
LRRC8A	1.03753	0.603513	0.82052
PRC1	0.772869	0.868543	0.820706
EFHD1	0.738608	0.908778	0.823693
MXD3	0.993031	0.658692	0.825862
AURKA	0.633837	1.0183	0.826071
TRAPPC6A	0.887156	0.76846	0.827808
MSI1	0.889269	0.767368	0.828318
CACNA2D2	0.757649	0.899987	0.828818
FRMPD3	0.846896	0.810999	0.828947
PTPRU	0.657913	1.00418	0.831044
ADGRE5	0.886883	0.77523	0.831057
SPRR2E	0.575502	1.09051	0.833004
C11orf84	1.03675	0.646332	0.841542
PDE9A	0.924669	0.758508	0.841588
EEF1A2	1.07818	0.614499	0.84634
TBC1D30	0.563137	1.13295	0.848041
TMCC1	1.00426	0.692543	0.8484
PRDM1	0.683897	1.02405	0.853974
MLPH	1.20809	0.501899	0.854996
DEPDC1	0.684242	1.02585	0.855047
TSPAN13	0.968388	0.741733	0.855061
IDI1	1.10172	0.609326	0.855521
NRARP	2.24463	-0.528274	0.858177
CDCA2	0.862134	0.855799	0.858967
KCNN4	1.18284	0.537949	0.860392
C1QL1	0.628206	1.10043	0.86432
CDKN3	0.526016	1.20719	0.866604
ADAMTSL4	2.69909	-0.961507	0.868792
ATP6V1C2	0.896197	0.843166	0.869682
FAM83D	1.0818	0.660802	0.871303
CD7	0.850606	0.89202	0.871313
SCD	0.921145	0.823818	0.872482
CLDN4	1.22155	0.526805	0.874178
ISG15	0.996923	0.752957	0.87494
LOC652276	0.512321	1.23861	0.875466
SPNS2	1.02729	0.725128	0.876211
CBARP	0.981595	0.771812	0.876704
DNAJB11	1.19714	0.561854	0.879496
IQGAP3	0.667618	1.09895	0.883284
CYP1A1	1.155	0.617345	0.886173
PELI1	1.13472	0.644438	0.889578
CDC20	0.763659	1.01848	0.891068
CPEB2	0.881815	0.906602	0.894208
PGM2L1	1.21286	0.586072	0.899466
KRT18	0.543068	1.25824	0.900653
ALCAM	0.756408	1.05279	0.904597
STARD4	1.16796	0.641758	0.90486
F2R	1.14133	0.670156	0.905743
CAPS	0.883968	0.931982	0.907975
FREM2	0.51085	1.30592	0.908383
GATA2	1.18688	0.635678	0.911277
SREBF1	0.87288	0.949816	0.911348
GADD45A	1.29653	0.531527	0.91403
REEP2	0.881832	0.949366	0.915599
KIF18A	0.774711	1.05735	0.916029
GNAO1	0.636862	1.19716	0.91701
NRGN	0.689479	1.14628	0.91788
TARS	1.06566	0.773314	0.919487
ARID3B	1.07679	0.763012	0.919901
KHDRBS3	0.592408	1.25056	0.921485
SMCO4	1.05696	0.786071	0.921516
FOXO3	0.999064	0.845024	0.922044
RRS1	0.990987	0.857457	0.924222
SOSTDC1	-1.65764	3.51063	0.926494
CORO1A	0.781182	1.07941	0.930297
LCE3E	0.8284	1.03565	0.932024
CCNB1	0.956468	0.908886	0.932677
NAALADL2	1.09188	0.778206	0.935044
ANKRD10	1.29365	0.578435	0.936044
TLE1	0.614124	1.26136	0.93774
GEM	3.27848	-1.39682	0.940829
ARL6IP1	1.12035	0.770858	0.945605
RASL11A	0.962693	0.929287	0.94599
PLK1	0.620379	1.28193	0.951153
TROAP	0.781051	1.12452	0.952784
SEMA7A	1.28833	0.618512	0.953419
TRAF4	1.42247	0.500696	0.961581
RBM24	1.14978	0.774723	0.962251
SESTD1	0.647135	1.27814	0.962635
CCDC64B	0.523603	1.40311	0.963356
UBE2S	1.41268	0.514114	0.963395
MEIS3	0.952573	0.976599	0.964586
MAP1LC3A	1.24828	0.680948	0.964612
PROSER2	1.15769	0.773328	0.965508
CAPN5	1.1795	0.752523	0.966012
PTPN21	0.958023	0.976727	0.967375
RORA-AS1	0.840041	1.09528	0.967659
CCNB1IP1	1.1338	0.808571	0.971184
METRNL	0.946185	0.999892	0.973038
PHRF1	0.933531	1.01902	0.976276
KCTD5	1.09154	0.864164	0.977853
STC2	1.2897	0.66741	0.978556
NFATC2	0.994814	0.965897	0.980356
CENPA	0.954326	1.0095	0.981914
B4GALNT3	0.753296	1.21433	0.983812
BMP8A	0.84096	1.12824	0.984599
FAM46A	1.38999	0.588708	0.989346
CGN	0.709467	1.27329	0.991379
KLK10	0.85438	1.13299	0.993684
ZBTB8B	0.962449	1.03364	0.998043
FAM72A	1.10957	0.891174	1.00037
PVRL2	1.00593	1.00959	1.00776
SIX4	1.03883	0.978262	1.00854
IL36RN	0.599074	1.41922	1.00915
UNC13A	0.875787	1.14533	1.01056
TIMP2	1.13101	0.896925	1.01397
KPNA2	1.10833	0.927459	1.01789
AMD1	1.4797	0.55654	1.01812
SLC17A5	0.627906	1.41676	1.02233
TMEM125	1.14388	0.905881	1.02488
CRY1	0.963594	1.08755	1.02557
ZNF341	1.54595	0.509745	1.02785
FAM124A	1.00529	1.05696	1.03113
RAB11FIP1	1.03776	1.02806	1.03291
HID1	1.19148	0.883471	1.03748
CERCAM	0.927747	1.14905	1.0384
ID2	1.27942	0.798408	1.03891
SDC2	0.746457	1.33142	1.03894
HES6	0.872514	1.2055	1.03901
NEK2	1.16266	0.918745	1.0407
SLC30A1	1.18462	0.899059	1.04184
LOC100128770	0.842887	1.24875	1.04582
GLDC	0.7787	1.31913	1.04892
DNER	1.18812	0.919892	1.054
KCNG3	1.22322	0.888782	1.056
HMGCS1	1.59197	0.525363	1.05866
MTHFD2	1.4505	0.670193	1.06035
ASS1	1.38526	0.73699	1.06112
KCNH2	1.28576	0.838261	1.06201
SLC7A11	0.996723	1.13201	1.06436
BDP1	1.10314	1.02761	1.06537
UGT8	0.800828	1.33117	1.066
MMP15	1.01907	1.1133	1.06619
TRIB3	1.34513	0.792857	1.06899
MFSD2A	1.04591	1.09538	1.07065
ADAMTS1	1.07779	1.06355	1.07067
FAM132B	0.718554	1.44914	1.08385
ATP12A	0.804868	1.36977	1.08732
PTPRJ	1.04711	1.13241	1.08976
IL23A	0.900862	1.28455	1.09271
HIST2H2BE	1.46173	0.729944	1.09584
AEN	1.63612	0.558229	1.09717
DHCR7	0.657896	1.54066	1.09928
HIC2	1.32982	0.875737	1.10278
GARS	1.4434	0.765425	1.10441
SPRY4	1.31841	0.898698	1.10856
PTTG1	1.28166	0.937033	1.10935
TRABD2A	1.33723	0.884675	1.11095
UBE2C	1.35867	0.86336	1.11101
CXCL17	0.923003	1.30073	1.11186
PLD6	1.51438	0.711531	1.11295
MIR4435-2HG	1.71415	0.513073	1.11361
JPH1	0.648456	1.58756	1.11801
CDKN2D	1.69255	0.545619	1.11909
FAM84B	1.64889	0.641307	1.1451
GAB2	1.41297	0.884068	1.14852
C2CD4A	1.23028	1.06708	1.14868
KIAA1211	1.3551	0.946736	1.15092
KRT80	0.812329	1.48982	1.15108
PDF	1.06685	1.24624	1.15655
KLK14	0.887066	1.43476	1.16092
SGMS2	1.65575	0.667388	1.16157
HDAC9	1.1084	1.22115	1.16477
TUBA1A	0.937074	1.40167	1.16937
MAP1S	1.55869	0.782789	1.17074
NRP2	0.63905	1.71643	1.17774
TNFRSF1B	1.36542	0.992378	1.1789
GPRC5B	1.03552	1.33353	1.18453
DPP4	1.28036	1.10249	1.19143
RARRES3	1.05172	1.33912	1.19542
CKS2	1.64236	0.750141	1.19625
GSN	0.90169	1.49423	1.19796
TRIM38	1.32869	1.06747	1.19808
ZNF165	1.87456	0.531389	1.20297
ANXA6	1.49776	0.912666	1.20521
COL4A2	0.857539	1.55747	1.2075
CDH23	1.38937	1.04248	1.21592
ABTB2	1.56629	0.868898	1.21759
FAM83E	1.30833	1.12854	1.21844
CARS	1.29722	1.14178	1.2195
CHRD	1.66093	0.778706	1.21982
KIAA1324	0.880654	1.55909	1.21987
ANXA9	0.839361	1.60898	1.22417
TUBB2A	1.4676	0.980905	1.22425
CEACAM7	1.28089	1.17039	1.22564
RGS9BP	1.12631	1.33235	1.22933
DAPK1	0.521092	1.93912	1.23011
PADI1	1.56733	0.893011	1.23017
ABL2	1.80594	0.656094	1.23101
APLP1	1.7945	0.680204	1.23735
FAM72B	0.954736	1.52881	1.24177
MICA	1.36367	1.1278	1.24573
KCNQ1	1.30143	1.19191	1.24667
SCIN	0.861656	1.64802	1.25484
TMSB15A	1.05384	1.45773	1.25579
TUBB3	1.40758	1.10887	1.25823
COL6A1	1.6016	0.919104	1.26035
ACBD7	1.28187	1.23908	1.26047
PRSS22	2.00174	0.520659	1.2612
FLJ42627	0.988809	1.53569	1.26225
AMOT	0.546266	1.98033	1.2633
BACE2	1.57649	0.957153	1.26682
LPIN1	1.38244	1.15987	1.27115
SPRY2	1.1573	1.40341	1.28036
GPRC5A	1.78588	0.775787	1.28083
DUSP4	1.24188	1.32172	1.2818
SDF2L1	1.84471	0.726398	1.28555
C15orf48	1.50518	1.07142	1.2883
CEACAM1	0.944069	1.64979	1.29693
HSH2D	1.27965	1.32016	1.29991
ANXA3	0.963779	1.64688	1.30533
NDRG2	0.890227	1.7373	1.31376
TCF24	1.6876	0.941823	1.31471
ASPRV1	0.744746	1.89349	1.31912
PADI2	1.46292	1.18518	1.32405
PIF1	1.13074	1.51944	1.32509
PCDH19	0.58646	2.06951	1.32798
RUNX2	1.09484	1.58508	1.33996
NUPR1	1.5664	1.11641	1.3414
KRT8	0.762069	1.92821	1.34514
MGAT3	1.21353	1.48365	1.34859
B4GALT5	1.23809	1.45932	1.3487
SMPD3	1.47626	1.22255	1.3494
RNU1-13P	0.994085	1.70917	1.35163
RGS3	0.947202	1.76246	1.35483
ZSCAN12P1	1.93027	0.779558	1.35491
ALK	0.874528	1.84277	1.35865
ELFN2	1.57397	1.14455	1.35926
PLXND1	0.955983	1.77939	1.36768
PLA2G16	0.692108	2.04958	1.37084
UPK2	0.963894	1.78064	1.37227
PCSK9	1.20633	1.5448	1.37557
FAM107B	1.51581	1.23839	1.3771
RTKN2	0.523076	2.23309	1.37808
44078	1.46266	1.30217	1.38241
EFNB2	0.848828	1.9163	1.38256
FSTL1	1.44961	1.34034	1.39498
CA2	0.774049	2.02208	1.39806
TSPAN1	1.64716	1.1582	1.40268
PRR15	0.732793	2.08527	1.40903
TJP3	2.05945	0.784831	1.42214
ADM2	1.466	1.39676	1.43138
CDR2	1.93202	0.932463	1.43224
DDIT3	2.03902	0.827748	1.43338
CEACAM6	0.978069	1.89595	1.43701
MDK	0.955666	1.93558	1.44562
HCN2	1.39568	1.49841	1.44704
GPAT3	1.66803	1.23594	1.45198
TNFSF9	1.57527	1.33969	1.45748
HLA-B	1.7685	1.16612	1.46731
PGBD5	1.11738	1.8192	1.46829
LZTS1	1.50809	1.44382	1.47596
VWA5B2	1.65956	1.31746	1.48851
MSMO1	2.47543	0.50384	1.48964
HLX	1.89188	1.09698	1.49443
AKAP12	0.961113	2.04877	1.50494
GAS2L3	1.49733	1.51827	1.5078
PSCA	1.43518	1.58458	1.50988
CTGF	2.04493	0.994523	1.51973
CHST8	0.923803	2.13011	1.52695
PRSS23	1.7217	1.3525	1.5371
NES	1.5335	1.55445	1.54398
HERPUD1	2.58548	0.536325	1.5609
FOXA1	1.44084	1.68357	1.56221
LYPD2	1.37054	1.75828	1.56441
PLEKHA6	1.51509	1.64106	1.57807
DEGS2	0.910222	2.24671	1.57846
FLT4	1.57328	1.59481	1.58404
SPRY1	0.877911	2.30446	1.59119
MMP17	1.39796	1.79086	1.59441
LONRF3	1.7813	1.41366	1.59748
LAMA1	1.44309	1.76937	1.60623
ZCCHC12	1.61345	1.61091	1.61218
SOCS1	1.3539	1.88985	1.62188
ASNS	1.94869	1.32323	1.63596
RGS16	2.23725	1.03834	1.6378
PRUNE2	0.795435	2.49389	1.64466
MUC20	1.56272	1.73552	1.64912
ELAVL3	2.70649	0.633431	1.66996
KIF21B	2.13517	1.23059	1.68288
NMUR2	1.046	2.32966	1.68783
CACNG4	2.42432	0.958018	1.69117
ESAM	1.60634	1.78095	1.69364
C1orf61	1.75365	1.70591	1.72978
LPL	2.11257	1.35151	1.73204
GALR2	1.51877	1.95094	1.73485
SCNN1A	1.48626	1.98834	1.7373
SNAI1	2.52445	0.951968	1.73821
RNF182	2.13921	1.34648	1.74285
ATP1A3	1.8182	1.67412	1.74616
ULBP1	1.76612	1.73897	1.75255
SMOC2	1.89083	1.627	1.75891
GALNT16	1.85661	1.66259	1.7596
CXCR4	2.01942	1.50795	1.76369
JDP2	2.14997	1.38594	1.76795
LOC729966	2.06423	1.47677	1.7705
TEK	1.06546	2.48211	1.77379
KCNG1	0.866803	2.6858	1.7763
LINGO1	1.68082	1.89139	1.78611
FA2H	1.68435	1.90591	1.79513
KIAA1462	2.02308	1.58157	1.80233
PODXL	1.14115	2.46771	1.80443
MYEOV	1.69947	1.95785	1.82866
MSLN	1.56258	2.10102	1.8318
ARC	2.345	1.32562	1.83531
MFAP5	1.02472	2.67417	1.84944
TWIST1	1.71422	1.98936	1.85179
C6orf15	1.16951	2.60855	1.88903
FIBCD1	1.35351	2.4788	1.91616
MYCN	1.65355	2.1926	1.92308
ZNF114	2.15186	1.70058	1.92622
RASD1	2.24468	1.60786	1.92627
LINC00152	2.38565	1.47825	1.93195
ILDR2	1.84792	2.03629	1.9421
INSIG1	2.41494	1.55744	1.98619
RNA28S5	2.35991	1.63185	1.99588
EOMES	2.83115	1.16116	1.99615
RASSF2	2.62183	1.42369	2.02276
KDR	0.951204	3.09446	2.02283
LINC01468	1.32075	2.74586	2.0333
LOC146513	2.23635	1.83267	2.03451
CHRM4	2.03818	2.05884	2.04851
SHISA8	2.24465	1.87656	2.06061
CEACAM5	1.50554	2.64636	2.07595
CAMKV	2.63144	1.55157	2.0915
LINC01206	0.717225	3.47979	2.09851
AOC1	2.16117	2.04409	2.10263
ADRA1D	2.09927	2.11363	2.10645
TPTEP1	0.972951	3.24289	2.10792
CLIC5	1.36974	2.85779	2.11376
TUBB2B	1.50961	2.75197	2.13079
CSF2RB	1.99706	2.2789	2.13798
GATA6	1.64816	2.63079	2.13947
ADAMTS7	2.23344	2.08638	2.15991
MME	1.40577	2.96653	2.18615
NPTX2	2.07014	2.31698	2.19356
UCA1	2.25838	2.17635	2.21736
RET	2.27482	2.16474	2.21978
FGF2	2.29548	2.18146	2.23847
DLL4	2.53449	1.97743	2.25596
NTRK3	1.84257	2.70467	2.27362
GDF15	2.33757	2.20993	2.27375
IGF1	1.89782	2.68921	2.29351
BMP6	1.86574	2.73793	2.30184
MIAT	1.53678	3.15467	2.34572
ACE	2.07253	2.62244	2.34748
ESM1	1.47039	3.257	2.3637
LYZ	2.16324	2.65424	2.40874
FBN2	1.1756	3.7092	2.4424
CACNA1C	2.3465	2.54457	2.44553
ITGB2	1.75707	3.15493	2.456
RASGEF1A	2.15802	2.8781	2.51806
RYR2	3.40544	1.65309	2.52927
SCN4A	2.42983	2.6489	2.53936
MUC16	1.86437	3.24735	2.55586
RAI2	2.57398	2.60784	2.59091
ALPPL2	2.50857	2.79532	2.65194
DKK1	2.61205	2.73843	2.67524
APOD	2.15634	3.25926	2.7078
PLEKHB1	2.1591	3.27772	2.71841
CHAC1	2.9751	2.52352	2.74931
NPTX1	2.64419	2.93197	2.78808
ADRA2C	2.73969	3.12241	2.93105
C11orf96	4.36617	1.53216	2.94916
TOX3	2.52384	3.5966	3.06022
SYBU	3.1864	3.47809	3.33225
CD70	2.95301	3.95181	3.45241
TMEM176B	3.46121	3.45575	3.45848
RNASE1	2.85442	4.18734	3.52088
VGLL1	2.75966	4.30673	3.53319
UNC5A	3.84962	3.55612	3.70287
LRRC15	4.12347	3.43093	3.7772
LINC00431	4.66503	2.98713	3.82608
KIF1A	3.80787	5.06197	4.43492

## Sheet: SCC152 sh2 DEGs
	baseMean	log2FoldChange	lfcSE	stat	pvalue	padj
HMGCS2	17.8383	-7.61684	1.59356	-4.77977	1.75493e-06	1.532e-05
SHROOM4	14.842	-7.35133	1.61909	-4.54042	5.61427e-06	4.52389e-05
INHBA	8.81636	-6.59966	1.73538	-3.80301	0.000142951	0.000877967
C12orf54	23.6111	-6.56186	1.54998	-4.23352	2.30063e-05	0.000165884
PRG1	18.6063	-6.21349	1.57363	-3.9485	7.86421e-05	0.000513462
AADAC	17.0897	-6.08898	1.58681	-3.83724	0.000124425	0.000776856
AQP10	33.9164	-6.08038	1.13077	-5.37723	7.56416e-08	8.15211e-07
CCDC33	6.022	-6.05039	1.86295	-3.24774	0.00116325	0.00569622
44166	5.52996	-5.92712	1.88305	-3.14762	0.00164605	0.0077422
TREM1	5.27292	-5.85864	1.90768	-3.07107	0.00213291	0.0097071
PLA2G4F	95.7461	-5.76427	0.621115	-9.28052	1.68659e-20	5.65778e-19
PCK1	12.7838	-5.66892	1.64836	-3.43912	0.000583601	0.0031147
ENOX1	4.53486	-5.64051	1.97285	-2.85906	0.00424896	0.0176879
KRT72	4.25947	-5.55104	2.03046	-2.73388	0.00625928	0.0247223
OLR1	4.01344	-5.46504	2.04164	-2.67679	0.0074331	0.0284985
CA12	1536.29	-5.44029	0.159535	-34.1009	7.14764e-255	4.11609e-251
FAT2	2292.54	-5.43369	0.144357	-37.6406	0	0
SPOCD1	42.4987	-5.38956	0.841501	-6.4047	1.50669e-10	2.25951e-09
DAPL1	78.6612	-5.28191	0.605279	-8.72641	2.62883e-18	7.51916e-17
CLDN14	9.30888	-5.19262	1.69878	-3.05668	0.00223801	0.0101373
AATF	9.24646	-5.18111	1.87054	-2.76985	0.00560826	0.0224903
NDRG1	67240.8	-5.17054	0.760824	-6.79598	1.07581e-11	1.80269e-10
TCONS_00029157	9.03715	-5.14883	1.71744	-2.99796	0.0027179	0.0119812
CEL	1219.91	-5.11851	0.185565	-27.5833	1.76517e-167	2.17822e-164
NKAIN2	8.05674	-4.9773	1.73695	-2.86554	0.00416303	0.0173721
NLRP1	135.733	-4.96768	0.430145	-11.5489	7.48068e-31	4.73393e-29
LCE1C	7.28693	-4.83742	1.76582	-2.73948	0.00615368	0.0243665
CASP1P2	14.0671	-4.7893	1.27036	-3.77005	0.000163215	0.000988686
LINC00842	7.02255	-4.78271	1.77988	-2.6871	0.00720756	0.0277693
SIRPB2	14.0768	-4.78106	1.25838	-3.79937	0.000145064	0.000890279
AKR1C2	5379.17	-4.72752	0.302317	-15.6376	4.03451e-55	7.04043e-53
PLIN2	6.78625	-4.7206	1.78815	-2.63994	0.00829202	0.031203
BAALC-AS2	6.52554	-4.66179	1.81271	-2.57172	0.0101195	0.0369919
AKR1B10	88.3669	-4.62263	0.499281	-9.25858	2.07175e-20	6.86977e-19
HNRNPA1P33	12.5493	-4.6092	1.28947	-3.57451	0.000350886	0.00197342
MROH7	6.02745	-4.55384	1.82578	-2.49419	0.0126244	0.0443472
KRT32	42.1626	-4.54925	0.704704	-6.45554	1.07831e-10	1.63125e-09
EGLN3	956.863	-4.46853	0.799491	-5.58921	2.28103e-08	2.62189e-07
AKR1C1	1531	-4.46507	0.144106	-30.9846	8.6991e-211	2.14694e-207
PLCH2	39.6216	-4.45586	0.725945	-6.13801	8.35604e-10	1.15395e-08
ISLR	34.1754	-4.45567	0.771414	-5.77598	7.65085e-09	9.28856e-08
FLRT3	158.178	-4.45273	0.364904	-12.2025	3.01585e-34	2.18915e-32
BNC1	241.338	-4.40811	0.294803	-14.9527	1.49454e-50	2.15165e-48
MAT1A	5.26973	-4.33854	1.89063	-2.29476	0.0217467	0.0701244
TMEM156	5.01399	-4.27687	1.89562	-2.25618	0.0240593	0.0758343
FOXP2	158.087	-4.24702	0.344159	-12.3403	5.49516e-35	4.12758e-33
PDZK1IP1	14.8154	-4.24345	1.10528	-3.83924	0.000123414	0.000771661
SERPINE1	731.436	-4.22887	0.174307	-24.261	5.05568e-130	3.63925e-127
CDHR1	19.3654	-4.21085	0.961361	-4.38009	1.18629e-05	9.00562e-05
MIR7854	4.77164	-4.20145	1.91452	-2.19452	0.028198	0.0864659
LUCAT1	41.2248	-4.13415	0.650196	-6.35831	2.03983e-10	3.0223e-09
RP1L1	4.52195	-4.11974	1.93904	-2.12463	0.0336174	0.0999782
LINC01267	4.51461	-4.11758	1.93639	-2.12642	0.0334683	0.0996034
RAB7B	329.16	-4.02354	0.244008	-16.4894	4.37327e-61	9.32749e-59
LOC101929023	8.54926	-4.01331	1.4052	-2.85605	0.00428947	0.0178265
SNAI2	784.432	-3.94908	0.163004	-24.2268	1.16028e-129	8.01799e-127
EDN2	87.1361	-3.91563	0.439163	-8.91612	4.82918e-19	1.4611e-17
EGR3	844.772	-3.90212	0.164885	-23.6657	8.13433e-124	5.40495e-121
SEPP1	15.8133	-3.89109	1.06031	-3.66975	0.000242787	0.00141225
TG	292.255	-3.88688	0.268683	-14.4664	1.97536e-47	2.47292e-45
HRH1	295.254	-3.87856	0.242925	-15.9661	2.20126e-57	4.179e-55
GJB6	3789.6	-3.87831	0.310894	-12.4747	1.02578e-35	8.09194e-34
C10orf99	177.683	-3.87589	0.315081	-12.3012	8.91864e-35	6.58455e-33
LOC389602	7.82222	-3.87467	1.45571	-2.66171	0.00777449	0.0295907
CHRNA2	37.4712	-3.8214	0.648544	-5.89227	3.80922e-09	4.81053e-08
SYNPO	396.8	-3.75024	0.212397	-17.6567	9.03101e-70	2.43781e-67
CASP1	121.281	-3.74439	0.372795	-10.0441	9.75501e-24	4.13058e-22
TTYH2	106.823	-3.7434	0.383766	-9.75439	1.76665e-22	6.79749e-21
KRT5	1167.03	-3.73477	0.133451	-27.9861	2.40139e-172	3.7715e-169
CAV1	168.926	-3.72685	0.315463	-11.8139	3.30874e-32	2.21557e-30
GBP1P1	77.0687	-3.72335	0.447071	-8.32832	8.19982e-17	2.11118e-15
LOC101927787	10.5559	-3.72202	1.1875	-3.13434	0.00172239	0.0080596
RASSF6	10.5449	-3.72057	1.19255	-3.11984	0.00180946	0.00842141
LINC00887	17.2925	-3.69749	0.958551	-3.85737	0.000114611	0.000720271
GBP1	33.912	-3.67304	0.662319	-5.54573	2.92724e-08	3.32048e-07
SPAG17	78.0238	-3.67281	0.448173	-8.19506	2.50471e-16	6.26215e-15
DUSP13	6.77571	-3.65163	1.51467	-2.41085	0.0159155	0.0540403
SLC6A7	6.52861	-3.6272	1.51472	-2.39463	0.0166369	0.0560491
SLA	16.5936	-3.62615	0.947208	-3.82825	0.000129058	0.000802304
FOSB	1863.44	-3.62528	0.292455	-12.396	2.74628e-35	2.11807e-33
RHOH	9.78244	-3.61441	1.21257	-2.98079	0.00287508	0.0125651
COL5A3	22.5446	-3.59734	0.821705	-4.3779	1.19829e-05	9.08362e-05
GBP6	3627.58	-3.58012	0.0995225	-35.973	2.2119e-283	1.91064e-279
LINC01564	12.8464	-3.56672	1.09296	-3.26335	0.00110102	0.00543464
KCNJ15	6.25322	-3.56116	1.53546	-2.31928	0.0203801	0.0663812
AADACP1	15.5253	-3.54332	0.977244	-3.62583	0.000288032	0.00165022
HSPB3	21.3914	-3.4992	0.82216	-4.2561	2.08019e-05	0.000151379
LINC01512	14.9978	-3.49837	1.03588	-3.37718	0.000732338	0.0038005
NGFR	194.454	-3.4982	0.289989	-12.0632	1.65176e-33	1.16e-31
TUBAL3	6.02793	-3.48544	1.50371	-2.31789	0.0204554	0.0665423
TAGAP	9.04178	-3.46686	1.28628	-2.69527	0.0070332	0.0271885
ST8SIA1	35.4027	-3.4578	0.632576	-5.46622	4.59725e-08	5.11082e-07
CLEC7A	130.064	-3.44829	0.357257	-9.65213	4.81451e-22	1.79645e-20
LOC646626	5.78925	-3.42132	1.53434	-2.22983	0.0257585	0.0801519
LOC285629	5.75988	-3.4144	1.54495	-2.21004	0.0271022	0.0835656
ISLR2	193.225	-3.41138	0.283431	-12.036	2.29751e-33	1.60695e-31
KRT1	729.437	-3.40444	0.471936	-7.21377	5.44222e-13	1.01753e-11
EHD2	1422.32	-3.37264	0.123785	-27.246	1.85238e-163	2.00011e-160
STRA6	117.262	-3.36387	0.345612	-9.73307	2.17913e-22	8.29222e-21
GPR132	47.4245	-3.35774	0.559211	-6.00442	1.92012e-09	2.50733e-08
ACSM6	11.0595	-3.33995	1.10342	-3.02692	0.00247062	0.0110576
IL10RA	41.1324	-3.33775	0.579559	-5.75912	8.45553e-09	1.02224e-07
WISP1	65.3567	-3.3124	0.494014	-6.70506	2.01319e-11	3.26571e-10
ANKRD20A19P	13.5826	-3.30965	1.00046	-3.30813	0.000939218	0.00471466
HOGA1	8.03827	-3.30557	1.27975	-2.58298	0.00979514	0.0359662
LOC728392	13.2964	-3.29912	1.00786	-3.27338	0.0010627	0.00527564
NIPAL4	72.3658	-3.29315	0.443921	-7.41833	1.18605e-13	2.38535e-12
TMC8	304.559	-3.27844	0.225419	-14.5438	6.39733e-48	8.24778e-46
ZNF812	49.4636	-3.25264	0.516544	-6.29693	3.03589e-10	4.43191e-09
SLC2A1	9705.88	-3.22764	0.25978	-12.4245	1.9243e-35	1.49748e-33
TENM2	2857.74	-3.21358	0.0999148	-32.1632	5.77378e-227	1.66246e-223
IL6R	585.736	-3.21227	0.168083	-19.1112	2.0367e-81	6.63889e-79
RHCG	40.2123	-3.1922	0.573165	-5.56943	2.5558e-08	2.91638e-07
APOBEC3A	15.1106	-3.18637	0.950555	-3.35212	0.000801955	0.00410993
LOC154761	15.0739	-3.18299	0.950053	-3.35033	0.000807156	0.00413328
FAM83A-AS1	12.311	-3.1683	1.0199	-3.10647	0.00189337	0.00874129
DKK3	723.591	-3.16243	0.158924	-19.899	4.15475e-88	1.56038e-85
ARHGAP22	24.3747	-3.14811	0.725213	-4.34095	1.41871e-05	0.000105965
NHEG1	7.26716	-3.14534	1.31444	-2.3929	0.0167156	0.0562702
ACP5	572.485	-3.1417	0.460415	-6.82362	8.87742e-12	1.49772e-10
KRT77	299.912	-3.1375	0.235676	-13.3128	1.95017e-40	1.84105e-38
PLAT	486.22	-3.13514	0.177797	-17.6333	1.36847e-69	3.58207e-67
MT1X	2785.65	-3.12277	0.121655	-25.6691	2.58789e-145	2.12897e-142
TMPRSS11E	9.52351	-3.12101	1.15187	-2.70952	0.00673807	0.0262414
IL36G	99.9523	-3.11966	1.10398	-2.82582	0.00471591	0.0193383
LPAR3	426.576	-3.11531	0.188985	-16.4844	4.7474e-61	1.0002e-58
MIR30A	172.305	-3.11137	0.633335	-4.91267	8.98422e-07	8.2744e-06
SERPINB4	348.481	-3.10924	0.592132	-5.25092	1.5134e-07	1.56186e-06
COL21A1	6.99306	-3.0992	1.39168	-2.22695	0.0259508	0.0806341
CAPN11	7.01746	-3.08915	1.32634	-2.32908	0.0198547	0.0649885
BTBD16	7.03085	-3.07836	1.32505	-2.32321	0.020168	0.0658396
OLFML2A	929.584	-3.06822	0.332198	-9.23612	2.55587e-20	8.37861e-19
LOC339539	7.03323	-3.06368	1.38811	-2.20709	0.0273081	0.0841078
OSMR-AS1	25.3532	-3.06006	0.699438	-4.37503	1.21415e-05	9.19984e-05
WNT6	11.5496	-3.05763	1.03303	-2.95987	0.00307764	0.0133457
KRT74	16.0587	-3.05367	0.875511	-3.48787	0.000486882	0.00264176
LOC101929897	22.8532	-3.04018	0.737516	-4.12219	3.75291e-05	0.000260383
PHYHIP	40.8697	-3.03889	0.556807	-5.45771	4.82309e-08	5.33784e-07
GBP2	231.676	-3.03271	0.698104	-4.34421	1.39778e-05	0.000104582
NCKAP5	18.058	-3.02983	0.826243	-3.667	0.000245414	0.00142561
ANXA8	1349.1	-3.01625	0.138921	-21.7119	1.58382e-104	8.29152e-102
LINC01549	9.03255	-3.01445	1.18495	-2.54394	0.0109609	0.0394419
EGFL6	28.8525	-3.00202	0.654554	-4.58636	4.5104e-06	3.69122e-05
DUSP9	760.919	-2.99086	0.683725	-4.37437	1.21784e-05	9.21975e-05
FAM83A	334.808	-2.9887	0.226486	-13.196	9.2528e-40	8.41038e-38
FOXN1	201.013	-2.98064	0.282571	-10.5483	5.17349e-26	2.53193e-24
CERS3	746.791	-2.97452	0.146243	-20.3396	5.74477e-92	2.42065e-89
TGM5	127.287	-2.97384	0.327759	-9.07327	1.15499e-19	3.62134e-18
LINC00928	8.79387	-2.9707	1.18018	-2.51716	0.0118305	0.0420542
SLCO1B7	6.49972	-2.96603	1.38759	-2.13754	0.0325542	0.0973528
SLAMF9	10.7982	-2.95676	1.05755	-2.79585	0.00517634	0.0209577
RDH16	21.595	-2.9524	0.747657	-3.94887	7.85215e-05	0.000512868
USH1G	236.694	-2.95212	0.247802	-11.9132	1.01024e-32	6.95336e-31
PTAFR	402.798	-2.94553	0.434394	-6.78078	1.1953e-11	1.99324e-10
C10orf91	17.0495	-2.94228	0.854	-3.44529	0.000570453	0.00305207
CA9	170.155	-2.93813	1.14507	-2.5659	0.0102909	0.0375076
SERPINB9	23.6321	-2.93771	0.723152	-4.06236	4.85784e-05	0.000329797
LOC101927686	165.846	-2.92661	0.281111	-10.4109	2.21195e-25	1.04982e-23
TMEM45A	228.203	-2.92577	0.261853	-11.1733	5.50713e-29	3.11938e-27
ZC4H2	10.5619	-2.91167	1.06669	-2.72963	0.00634062	0.0249523
HSD17B3	62.9934	-2.91124	0.44609	-6.52612	6.74943e-11	1.03555e-09
KRT15	5187.3	-2.8969	0.218837	-13.2377	5.31343e-40	4.90882e-38
PFKFB4	1674.29	-2.89646	0.464382	-6.23724	4.45367e-10	6.36934e-09
GJB2	3144	-2.88908	0.292752	-9.86871	5.6889e-23	2.27503e-21
CYP4F11	105.916	-2.88822	0.341521	-8.45695	2.74453e-17	7.28333e-16
MAB21L3	8.27742	-2.88297	1.18921	-2.42426	0.0153395	0.0523759
KRT10	5338.94	-2.87364	0.0948719	-30.2897	1.56563e-201	3.00531e-198
SORCS2	22.3167	-2.86581	0.767589	-3.73352	0.000188819	0.00112817
DST	14400.2	-2.86298	0.085194	-33.6054	1.39936e-247	6.04383e-244
LINC00173	14.3119	-2.85318	0.922339	-3.09342	0.00197863	0.00908635
EGR2	575.851	-2.83032	0.473908	-5.9723	2.33935e-09	3.03641e-08
ARHGAP24	106.333	-2.82873	0.360153	-7.85425	4.02184e-15	9.13026e-14
S1PR4	9.76527	-2.81296	1.16207	-2.42064	0.0154931	0.052824
SLC1A3	159.65	-2.80887	0.292405	-9.60612	7.53354e-22	2.76326e-20
KLHDC7B	19.8703	-2.80623	0.7837	-3.58075	0.000342613	0.00193304
C17orf99	47.3633	-2.8008	0.537983	-5.20611	1.92837e-07	1.96083e-06
PAX8	70.7393	-2.80038	0.411413	-6.80672	9.98456e-12	1.67788e-10
ALDH2	45.1696	-2.7978	0.510652	-5.47889	4.28011e-08	4.76131e-07
LINC00884	9.76634	-2.79293	1.0944	-2.55202	0.01071	0.0387004
LOC100129316	7.77199	-2.79086	1.22674	-2.27502	0.0229047	0.0730077
LOC100996351	9.80911	-2.78992	1.09428	-2.54955	0.0107862	0.0389025
PCDHGB6	9.82617	-2.78275	1.11927	-2.48622	0.0129108	0.0452876
AHNAK2	9286.9	-2.76944	0.0905431	-30.587	1.82192e-205	3.93444e-202
FAM212A	90.455	-2.76838	0.37636	-7.35567	1.89966e-13	3.72937e-12
PTPRR	43.928	-2.73801	0.561846	-4.87325	1.09779e-06	9.96081e-06
PLB1	217.853	-2.73794	0.253466	-10.802	3.36814e-27	1.73696e-25
LINC00970	41.6	-2.73658	0.537258	-5.09362	3.51297e-07	3.42494e-06
PCDHGC5	7.51496	-2.73554	1.23762	-2.21032	0.0270833	0.0835372
GIMAP8	7.55275	-2.71906	1.24431	-2.1852	0.0288744	0.0881956
FHL2	753.187	-2.71663	0.169424	-16.0346	7.33052e-58	1.40713e-55
UNC45B	35.6191	-2.71604	0.57912	-4.68995	2.73274e-06	2.31994e-05
ITGAM	55.932	-2.71074	0.457825	-5.92091	3.20156e-09	4.07592e-08
BAALC	148.613	-2.70998	0.296259	-9.14733	5.83578e-20	1.87048e-18
ADCY5	87.5513	-2.70874	0.368464	-7.35144	1.96084e-13	3.84076e-12
EPHB6	290.157	-2.70841	0.212668	-12.7354	3.75736e-37	3.13586e-35
RDH12	55.7408	-2.69991	0.462891	-5.8327	5.45367e-09	6.73465e-08
TMEM63C	218.906	-2.69344	0.245591	-10.9672	5.49769e-28	2.9405e-26
CX3CL1	813.85	-2.67859	0.520421	-5.14698	2.6472e-07	2.63895e-06
DNAI2	8.99416	-2.67784	1.19132	-2.2478	0.0245891	0.0772226
COL27A1	292.859	-2.6634	0.234359	-11.3646	6.27517e-30	3.72542e-28
COL4A6	48.9402	-2.66271	0.484703	-5.49349	3.94074e-08	4.41793e-07
LOC158434	10.7852	-2.65788	1.02728	-2.5873	0.00967315	0.0356091
TP63	16498	-2.65044	0.0808975	-32.7629	1.98802e-235	6.869e-232
SOCS2	99.6427	-2.64741	0.3912	-6.76741	1.3111e-11	2.18003e-10
ODF3L1	16.0693	-2.63008	0.845484	-3.11074	0.00186619	0.00865253
FGR	14.3404	-2.62505	0.932065	-2.81638	0.0048568	0.0198079
MSMB	67.1735	-2.6219	0.42406	-6.18285	6.29535e-10	8.84935e-09
VAV3	128.423	-2.60597	0.343043	-7.59664	3.03923e-14	6.49823e-13
LINC01136	10.555	-2.60496	1.03227	-2.52353	0.0116183	0.0414619
KRT38	12.3387	-2.59758	0.994218	-2.61269	0.00898333	0.0334321
WNT10A	19.0839	-2.58775	0.765779	-3.37923	0.000726881	0.00377559
TNS4	3336.52	-2.5872	0.0926105	-27.9364	9.64427e-172	1.38845e-168
CAMK1G	53.7511	-2.58317	0.46862	-5.51229	3.54198e-08	3.98381e-07
PHLDB2	5516.11	-2.56803	0.11169	-22.9925	5.54506e-117	3.4213e-114
ABCC3	233.213	-2.56588	0.239666	-10.7061	9.52854e-27	4.79927e-25
OTUD7A	12.0854	-2.56251	1.00009	-2.56228	0.0103986	0.0378044
CGB7	25.5914	-2.56032	0.659599	-3.88162	0.000103761	0.00065855
ADCY10	98.7366	-2.55442	0.379638	-6.72858	1.71331e-11	2.8136e-10
ANXA8L1	908.394	-2.54905	0.142036	-17.9465	5.11015e-72	1.47138e-69
LOC101928034	141.475	-2.54336	0.291538	-8.72394	2.68674e-18	7.65942e-17
LOC101928100	124.044	-2.52521	0.321944	-7.84365	4.37648e-15	9.90931e-14
PLEKHA4	40.1051	-2.5249	0.539465	-4.68039	2.86336e-06	2.41658e-05
KRT84	10.0446	-2.52132	1.04891	-2.40374	0.0162283	0.0549404
KRT42P	56.2082	-2.50862	0.44683	-5.61425	1.97413e-08	2.28893e-07
LINC01348	132.558	-2.5053	0.314447	-7.96732	1.62147e-15	3.7906e-14
LOC101927136	18.0423	-2.49793	0.780506	-3.20039	0.00137241	0.00659523
SNCA	170.386	-2.49326	0.26456	-9.42416	4.33557e-21	1.50404e-19
STARD5	112.913	-2.49092	0.31908	-7.80658	5.87599e-15	1.31836e-13
PPP2R2B	485.05	-2.48652	0.17184	-14.47	1.87445e-47	2.36372e-45
P2RY2	571.404	-2.48063	0.160787	-15.428	1.06048e-53	1.74484e-51
IGSF10	35.5695	-2.4784	0.563898	-4.39512	1.10712e-05	8.4819e-05
PARM1	144.101	-2.47246	0.301392	-8.20347	2.33548e-16	5.84749e-15
ADAD2	32.3615	-2.47219	0.582084	-4.24713	2.16522e-05	0.000156972
HK2	3481.54	-2.45547	0.523754	-4.6882	2.75614e-06	2.33636e-05
FPGT-TNNI3K	9.47933	-2.45124	1.12767	-2.17372	0.029726	0.0902541
GPNMB	10380.6	-2.44799	0.0939766	-26.0489	1.38425e-149	1.19572e-146
LGI3	42.9035	-2.44026	0.506062	-4.82205	1.42089e-06	1.26467e-05
NRXN3	294.561	-2.43459	0.215014	-11.3229	1.01035e-29	5.9573e-28
CPNE5	11.0134	-2.42865	0.995987	-2.43843	0.014751	0.0507445
UCN2	39.3883	-2.42125	0.536225	-4.51537	6.32076e-06	5.02982e-05
HGF	11.0475	-2.41796	1.00148	-2.41439	0.0157614	0.0535907
PPFIA4	1396.47	-2.41573	0.834306	-2.8955	0.0037855	0.0159976
TRPV6	18.831	-2.41522	0.759737	-3.17902	0.00147776	0.00704075
COL7A1	6995.69	-2.41517	0.0942827	-25.6163	1.00472e-144	7.8898e-142
GAS7	57.9649	-2.41472	0.43738	-5.52088	3.37307e-08	3.79877e-07
SERPINB3	1709.56	-2.41236	0.136942	-17.616	1.85835e-69	4.79177e-67
C1orf228	45.4355	-2.41036	0.500882	-4.81222	1.49259e-06	1.31966e-05
ADRB2	172.774	-2.40861	0.3132	-7.69034	1.4675e-14	3.20918e-13
FBXO32	1520.18	-2.40059	0.333053	-7.20784	5.68482e-13	1.06174e-11
TNC	5114.64	-2.39506	0.0866355	-27.6453	3.17823e-168	4.22362e-165
SEMA4B	3249.33	-2.38599	0.111187	-21.4593	3.7363e-102	1.89848e-99
RAET1E	41.3261	-2.3845	0.520176	-4.58402	4.5612e-06	3.7275e-05
CHI3L1	13.7953	-2.3825	0.880314	-2.70642	0.00680125	0.0264398
ATP2C2	182.218	-2.37765	0.260104	-9.14116	6.17884e-20	1.97312e-18
LINC00885	80.6892	-2.36858	0.376787	-6.28624	3.25242e-10	4.72571e-09
LOC100129203	60.6645	-2.36839	0.437436	-5.41426	6.15431e-08	6.72923e-07
GHR	106.547	-2.36757	0.325758	-7.26789	3.65153e-13	6.93992e-12
TCAF2	207.686	-2.36631	0.662481	-3.57188	0.000354421	0.00199121
BAALC-AS1	21.2837	-2.3658	0.725369	-3.2615	0.00110823	0.00546396
HES2	737.348	-2.36296	0.152228	-15.5225	2.44337e-54	4.1384e-52
SESN3	8049.26	-2.35537	0.0785347	-29.9914	1.26976e-197	2.19364e-194
MMP10	21.0624	-2.35531	0.726195	-3.24336	0.00118127	0.00577304
ATP6V0D2	10.5287	-2.35092	1.0009	-2.34881	0.0188334	0.0621994
PCDHB19P	12.0494	-2.3491	0.940254	-2.49836	0.0124769	0.0439898
PCDHB11	24.0583	-2.34664	0.669458	-3.50528	0.000456131	0.00249529
RNF217-AS1	111.428	-2.34408	0.324449	-7.22479	5.01879e-13	9.43467e-12
ITGAX	18.0672	-2.34403	0.769946	-3.04441	0.00233134	0.0105023
CERS3-AS1	10.5408	-2.33696	1.02138	-2.28804	0.0221352	0.0710782
FRMD6-AS2	103.061	-2.32722	0.364841	-6.37871	1.78589e-10	2.65975e-09
PCSK1	285.141	-2.32648	0.206349	-11.2745	1.75333e-29	1.01988e-27
SLC47A2	114.342	-2.32593	0.311682	-7.46251	8.48875e-14	1.74171e-12
TMPRSS11F	86.8055	-2.31802	0.38686	-5.99188	2.07427e-09	2.69639e-08
MSN	28.1333	-2.31794	0.631228	-3.67212	0.000240547	0.00140291
ZNF385A	3190.1	-2.31742	0.103853	-22.3144	2.6775e-110	1.49214e-107
CYTH4	10.2656	-2.31543	1.02291	-2.26358	0.0235999	0.0747137
BCAM	4584.2	-2.31289	0.0980062	-23.5994	3.91031e-123	2.50202e-120
GJA1	3832.56	-2.31169	0.113402	-20.3849	2.27592e-92	1.00817e-89
WNT3A	349.401	-2.30948	0.193891	-11.9112	1.03443e-32	7.09156e-31
WNT4	376.006	-2.30717	0.200991	-11.479	1.68283e-30	1.04203e-28
PAX8-AS1	27.563	-2.2889	0.621582	-3.68238	0.000231068	0.00135274
ERG	29.1055	-2.28404	0.610282	-3.74261	0.000182122	0.00109134
GJA3	180.646	-2.27292	0.261203	-8.70174	3.26843e-18	9.27182e-17
CMTM2	23.3749	-2.27258	0.760459	-2.98843	0.00280414	0.0122924
SLC2A1-AS1	39.1272	-2.27244	0.556039	-4.08684	4.37287e-05	0.000299784
EGR4	24.6143	-2.27223	0.666703	-3.40816	0.000654033	0.00343541
KLHDC8B	101.377	-2.26336	0.344655	-6.56705	5.13228e-11	7.93071e-10
MPPED1	230.683	-2.26215	0.224837	-10.0613	8.19202e-24	3.47728e-22
KY	17.3326	-2.25624	0.840903	-2.68311	0.00729405	0.0280691
MMP1	19.7711	-2.25028	0.745177	-3.0198	0.00252945	0.0112859
APOBEC3D	18.5658	-2.24571	0.777753	-2.88743	0.00388398	0.0163311
CYP24A1	343.897	-2.23666	0.20499	-10.9111	1.0205e-27	5.40803e-26
RASA4CP	11.2893	-2.23599	0.958087	-2.33381	0.0196058	0.0643445
NIM1K	35.3528	-2.23396	0.561977	-3.97517	7.0329e-05	0.000462506
KRT14	89.7163	-2.23323	0.371391	-6.01315	1.81948e-09	2.38131e-08
UGT1A3	14.0321	-2.23206	0.862687	-2.58734	0.0096721	0.0356091
CASP10	32.3726	-2.22512	0.577935	-3.85012	0.000118058	0.000740045
RGCC	37.8863	-2.22288	0.530145	-4.19296	2.75334e-05	0.000196233
RIN1	402.676	-2.22054	0.175029	-12.6867	7.01002e-37	5.76691e-35
HSD3BP4	50.4844	-2.21816	0.473288	-4.68669	2.77659e-06	2.35254e-05
KCND3	32.0717	-2.21666	0.573687	-3.86388	0.000111599	0.000704158
RFX2	307.098	-2.21283	0.203953	-10.8497	2.00158e-27	1.03842e-25
PLTP	339.326	-2.21001	0.196771	-11.2314	2.85934e-29	1.6466e-27
IL1B	48.6274	-2.20974	0.466379	-4.73807	2.1576e-06	1.86266e-05
KRT6C	2374.08	-2.20713	0.381876	-5.77971	7.48292e-09	9.10387e-08
TMEM37	52.6704	-2.20154	0.451422	-4.8769	1.07765e-06	9.79871e-06
S100A3	189.947	-2.18539	0.254179	-8.59784	8.12338e-18	2.21356e-16
GNAI1	252.576	-2.18035	0.215465	-10.1193	4.5378e-24	1.96972e-22
TMEM158	54.3339	-2.17242	0.448527	-4.84345	1.27602e-06	1.14995e-05
SELE	17.8765	-2.16823	0.826067	-2.62477	0.00867085	0.0324425
NFAM1	15.0665	-2.16381	0.887262	-2.43875	0.0147382	0.050711
RAET1G	48.5888	-2.15974	0.470106	-4.59415	4.3452e-06	3.56447e-05
PCDHB10	14.7866	-2.15878	0.845139	-2.55435	0.0106386	0.0384825
SLC5A12	10.7642	-2.15279	0.984309	-2.18711	0.0287345	0.0878615
CISH	83.2565	-2.14488	0.364743	-5.88052	4.08974e-09	5.13262e-08
TYMP	1350.02	-2.13401	0.111554	-19.1298	1.42602e-81	4.83058e-79
LOC102724312	14.532	-2.12274	0.837849	-2.53355	0.0112912	0.0404704
IL20RB	123.167	-2.12251	0.3003	-7.06797	1.57214e-12	2.83806e-11
IL16	114.635	-2.12247	0.319762	-6.63765	3.18719e-11	5.04693e-10
LRP1	6654.2	-2.12096	0.337064	-6.29247	3.12451e-10	4.54369e-09
CRYAB	1579.13	-2.12055	0.136536	-15.5311	2.1379e-54	3.65687e-52
MIR205HG	3409.34	-2.11736	0.103174	-20.5223	1.36086e-93	6.18689e-91
GPLD1	216.113	-2.11513	0.254315	-8.31699	9.02274e-17	2.31615e-15
SSTR5	17.008	-2.11479	0.789251	-2.67949	0.00737354	0.0283141
MIR23A	17.0007	-2.11417	0.79218	-2.6688	0.0076122	0.0290754
CARD16	15.8029	-2.11413	0.805629	-2.6242	0.00868532	0.0324778
ITGB6	965.494	-2.11335	0.368846	-5.72961	1.0066e-08	1.20848e-07
SAMD5	168.166	-2.11302	0.258298	-8.18052	2.82619e-16	7.03535e-15
SLITRK6	378.506	-2.10782	0.191157	-11.0266	2.84298e-28	1.54451e-26
CLCA2	4186.85	-2.10726	0.251419	-8.38149	5.22622e-17	1.37008e-15
PGF	166.544	-2.10493	0.260528	-8.0795	6.50327e-16	1.57796e-14
PKD1L1	23.5355	-2.1019	0.670751	-3.13366	0.00172641	0.00806965
ACSBG1	112.273	-2.10171	0.310781	-6.76266	1.35478e-11	2.24833e-10
FAM181B	32.5734	-2.09664	0.562669	-3.72623	0.000194362	0.00115746
LINC00319	31.3462	-2.09453	0.580182	-3.61012	0.000306052	0.0017427
TET1	90.3586	-2.09188	0.385644	-5.42437	5.81597e-08	6.39572e-07
MIR210HG	145.571	-2.09183	0.344904	-6.06495	1.31997e-09	1.77048e-08
ELFN1	28.2345	-2.08982	0.661152	-3.16087	0.00157297	0.00744498
DSC3	8927.59	-2.08407	0.0786762	-26.4891	1.29275e-154	1.17545e-151
SH2D3C	65.9488	-2.07996	0.399619	-5.20486	1.94142e-07	1.97294e-06
CYGB	50.1117	-2.07137	0.455483	-4.54764	5.42511e-06	4.38784e-05
CSF1	34.9118	-2.07087	0.563256	-3.6766	0.000236366	0.00138048
EFCAB6-AS1	15.3025	-2.06728	0.865367	-2.3889	0.0168989	0.0567988
THEM5	34.4913	-2.06666	0.582935	-3.54527	0.000392218	0.00218157
NTS	1420.12	-2.06564	0.142885	-14.4566	2.27636e-47	2.82924e-45
SIK1	292.133	-2.06548	0.204698	-10.0903	6.09551e-24	2.60015e-22
IGFBP3	4395.15	-2.06374	0.345673	-5.9702	2.36962e-09	3.07339e-08
LDLRAD1	12.7921	-2.05635	0.893029	-2.30267	0.0212974	0.0689143
CSRNP1	435.691	-2.05209	0.598485	-3.42881	0.000606245	0.00322124
MXI1	985.779	-2.04921	0.153199	-13.3761	8.34275e-41	8.05192e-39
AKR1C3	96.5685	-2.04702	0.335384	-6.10353	1.03753e-09	1.41248e-08
CGNL1	127.866	-2.04105	0.293994	-6.94249	3.85249e-12	6.75692e-11
PPP2R2C	47.8811	-2.03542	0.463961	-4.38704	1.14902e-05	8.76402e-05
NTF4	92.0306	-2.03056	0.352004	-5.76858	7.99446e-09	9.68529e-08
BNIP3	3258.96	-2.02786	0.673259	-3.01201	0.00259522	0.0115435
MYLK	122.511	-2.02455	0.29669	-6.8238	8.86636e-12	1.49731e-10
ZC3H12A	1417.48	-2.02363	0.472214	-4.28541	1.82403e-05	0.000133752
LINC01550	15.0599	-2.02281	0.822516	-2.45929	0.0139212	0.0482743
PCDHB12	32.6043	-2.02197	0.564079	-3.58455	0.000337666	0.00190638
STC1	35.1789	-2.00744	0.624858	-3.21263	0.00131525	0.0063523
C1QTNF8	19.4725	-1.99907	0.795309	-2.51357	0.0119515	0.0424233
GLIPR1	154.605	-1.99191	0.296821	-6.71082	1.93536e-11	3.14242e-10
MYO7B	13.5392	-1.99038	0.860072	-2.31421	0.0206565	0.0671296
DHRS3	439.249	-1.98037	0.178877	-11.0712	1.73148e-28	9.5569e-27
TLL2	18.3002	-1.97928	0.742933	-2.66415	0.00771836	0.0294419
VWA5A	31.4861	-1.97706	0.592409	-3.33732	0.000845894	0.00430446
COL16A1	186.54	-1.97407	0.244586	-8.07108	6.96779e-16	1.68357e-14
NPHS1	19.5563	-1.96837	0.75545	-2.60556	0.00917248	0.034049
THEG	43.5852	-1.96703	0.484403	-4.06073	4.89199e-05	0.000331688
FADS6	52.9826	-1.96478	0.467781	-4.20022	2.66655e-05	0.000190597
NRN1	655.073	-1.96477	0.80225	-2.44908	0.0143222	0.049496
AATBC	282.689	-1.96405	0.213417	-9.2029	3.48411e-20	1.1293e-18
SLCO1B3	145.345	-1.95934	0.669342	-2.92726	0.00341965	0.014625
KRT16P1	48.005	-1.95785	0.479576	-4.08246	4.4562e-05	0.000305134
UBA7	109.742	-1.95144	0.333888	-5.8446	5.07791e-09	6.2886e-08
PADI3	46.7862	-1.94968	0.482681	-4.03927	5.3619e-05	0.000361421
FAM13A	155.63	-1.93932	0.274538	-7.06394	1.61849e-12	2.91869e-11
GPX2	2519.32	-1.93858	0.101688	-19.064	5.02794e-81	1.57932e-78
NOS1	363.548	-1.93719	0.18925	-10.2361	1.36625e-24	6.21138e-23
KRT13	29496.2	-1.93586	0.0773928	-25.0134	4.36637e-138	3.27971e-135
LINC00950	47.5922	-1.93507	0.462856	-4.18072	2.90592e-05	0.000206171
NCOA7	1063.85	-1.93191	0.119845	-16.1201	1.84401e-58	3.66174e-56
MR1	933.205	-1.91651	0.323181	-5.93013	3.0269e-09	3.87067e-08
GABRE	332.649	-1.91474	0.188713	-10.1463	3.44108e-24	1.52431e-22
SLC28A3	179.936	-1.90798	0.311422	-6.12667	8.974e-10	1.23534e-08
LTB4R	974.964	-1.90533	0.130089	-14.6464	1.42113e-48	1.90321e-46
EGR1	5889.93	-1.90489	0.692821	-2.74948	0.00596908	0.0237116
FAM227A	31.5281	-1.9039	0.568684	-3.3479	0.000814252	0.00416307
PCDHGA10	52.9198	-1.90216	0.455812	-4.17312	3.00455e-05	0.000212384
CCDC3	262.876	-1.89976	0.218482	-8.6953	3.45918e-18	9.79686e-17
ARNT2	295.702	-1.89932	0.195936	-9.69357	3.21115e-22	1.21126e-20
MAF	277.944	-1.89844	0.210956	-8.99922	2.2733e-19	7.02569e-18
SLC34A1	65.7365	-1.89288	0.446809	-4.23645	2.2708e-05	0.000164006
PCDHGA9	26.8012	-1.89246	0.614074	-3.0818	0.0020575	0.00940851
PTHLH	45.3505	-1.89239	0.473322	-3.9981	6.38535e-05	0.00042363
VSIG1	46.6908	-1.88813	0.480996	-3.92546	8.65627e-05	0.000560096
LOC284080	55.8713	-1.8876	0.4394	-4.29586	1.74019e-05	0.000128257
LINC00663	15.0019	-1.88394	0.819519	-2.29884	0.0215141	0.0695115
SDK2	1907.54	-1.88316	0.105431	-17.8616	2.34992e-71	6.54794e-69
SAA1	16.3337	-1.8812	0.803455	-2.34139	0.0192123	0.0632693
LOC100288846	27.5631	-1.86706	0.600522	-3.10907	0.00187679	0.00868562
LOC102724050	13.7797	-1.86686	0.844134	-2.21157	0.0269962	0.083328
LINC01137	65.7495	-1.8658	0.412661	-4.52139	6.14356e-06	4.90237e-05
AFAP1L2	35.5788	-1.86483	0.530792	-3.5133	0.000442571	0.00243248
KRT16P3	19.2892	-1.85464	0.742456	-2.49798	0.0124903	0.0440282
DLK2	392.044	-1.85441	0.183587	-10.101	5.46829e-24	2.35001e-22
CASC19	155.627	-1.85066	0.278059	-6.65564	2.82068e-11	4.51623e-10
AIM1L	1495.8	-1.84939	0.107049	-17.2761	7.12446e-67	1.75832e-64
SLC22A23	1717.87	-1.84765	0.122357	-15.1005	1.60799e-51	2.41563e-49
PCDHB14	110.255	-1.84698	0.307413	-6.00812	1.87688e-09	2.45272e-08
TGM3	3045.94	-1.84414	0.11396	-16.1823	6.71981e-59	1.3499e-56
NDRG4	1380.14	-1.82085	0.125165	-14.5475	6.05408e-48	7.92351e-46
LOC344887	839.403	-1.82026	0.14173	-12.8431	9.39789e-38	8.1179e-36
EID3	63.0231	-1.81921	0.42589	-4.27155	1.94122e-05	0.000141864
LGALS7B	360.328	-1.81916	0.190878	-9.53052	1.56503e-21	5.63279e-20
FAM49A	153.365	-1.81905	0.262952	-6.9178	4.5872e-12	7.96467e-11
COL17A1	10456	-1.81683	0.0873235	-20.8058	3.83782e-96	1.79195e-93
SEMA3C	369.045	-1.81668	0.181794	-9.99308	1.6342e-23	6.77036e-22
PTGS2	26.1506	-1.81653	0.76158	-2.38521	0.0170695	0.0572716
VDR	301.594	-1.81557	0.194822	-9.31914	1.17289e-20	3.95758e-19
TLR3	177.381	-1.81322	0.291518	-6.21992	4.97408e-10	7.05519e-09
GS1-279B7.1	14.5463	-1.81117	0.827389	-2.18902	0.0285952	0.0875131
KLK9	207.204	-1.80929	0.230967	-7.83354	4.74336e-15	1.0684e-13
CREB5	25.554	-1.80732	0.621357	-2.90867	0.00362971	0.0154071
KRT75	1276.97	-1.80711	0.459387	-3.93375	8.36303e-05	0.000542749
MKNK2	9849.1	-1.80406	0.108136	-16.6832	1.73519e-62	3.89313e-60
GAL3ST4	149.372	-1.80238	0.275287	-6.54728	5.85951e-11	9.03024e-10
KRT6B	10100.8	-1.79985	0.0826022	-21.7893	2.93045e-105	1.58208e-102
KCTD11	1268.62	-1.79898	0.320493	-5.61318	1.98642e-08	2.30163e-07
EFNB1	1426.24	-1.79621	0.108867	-16.4992	3.71829e-61	8.02965e-59
ESPN	96.4144	-1.79221	0.366893	-4.88482	1.03522e-06	9.42774e-06
CHST2	940.077	-1.7903	0.124465	-14.384	6.52606e-47	7.88421e-45
STK32A	44.4347	-1.78893	0.524698	-3.40944	0.00065096	0.00342344
CCL24	16.5277	-1.78381	0.792951	-2.24959	0.0244752	0.0769069
RNF165	78.1888	-1.78292	0.380108	-4.69054	2.7248e-06	2.31434e-05
GM2A	4804.58	-1.7824	0.0839029	-21.2436	3.77405e-100	1.86287e-97
SLC29A4	584.569	-1.78216	0.15936	-11.1833	4.92336e-29	2.80713e-27
PTPRN	25.3346	-1.77595	0.660163	-2.69016	0.00714167	0.0275585
DFNA5	77.6445	-1.77505	0.364978	-4.86344	1.15366e-06	1.04458e-05
ZBED2	49.8291	-1.76322	0.450538	-3.91358	9.09375e-05	0.000586754
GCLC	2539.74	-1.75885	0.103206	-17.0421	4.00309e-65	9.74047e-63
MAP3K8	462.612	-1.75476	0.174735	-10.0424	9.92084e-24	4.19052e-22
DNAH9	23.8532	-1.75353	0.658616	-2.66245	0.0077574	0.0295452
TNS3	661.924	-1.75229	0.155359	-11.279	1.66693e-29	9.72901e-28
LOC285768	43.0804	-1.74794	0.479285	-3.64698	0.000265341	0.00152954
ADORA2B	261.019	-1.74361	0.205207	-8.49684	1.94823e-17	5.21823e-16
HEY1	874.83	-1.74292	0.125866	-13.8474	1.31875e-43	1.43288e-41
FAM110C	174.867	-1.74072	0.246065	-7.07424	1.50268e-12	2.71835e-11
LOC100996251	33.362	-1.7406	0.550096	-3.16418	0.00155519	0.00738118
INPP4B	22.6004	-1.7309	0.688133	-2.51536	0.011891	0.0422346
LUZP2	23.5594	-1.73088	0.652442	-2.65292	0.00797993	0.0302195
FSTL4	981.186	-1.7295	0.136096	-12.7079	5.3425e-37	4.43736e-35
SRGAP3	307.017	-1.7263	0.198745	-8.68605	3.75276e-18	1.05763e-16
SCHIP1	22.2898	-1.71898	0.662805	-2.59349	0.00950078	0.0350792
GPI	24295.6	-1.71431	0.390539	-4.3896	1.13559e-05	8.66923e-05
PLXNA4	20.0172	-1.71218	0.698182	-2.45233	0.0141933	0.0491094
HCAR3	24.2786	-1.7089	0.642529	-2.65964	0.00782237	0.0297533
SLC40A1	55.7947	-1.70733	0.428902	-3.98069	6.87152e-05	0.000453274
ITGA6	9823.31	-1.70591	0.0864014	-19.744	9.03053e-87	3.31939e-84
GJB5	573.128	-1.70402	0.153033	-11.135	8.47582e-29	4.75417e-27
KLF7	1528.62	-1.69989	0.118211	-14.3801	6.9025e-47	8.28109e-45
JHDM1D-AS1	372.125	-1.69957	0.178258	-9.53431	1.50885e-21	5.47623e-20
MYO1B	1363.15	-1.6983	0.110705	-15.3408	4.08e-53	6.58748e-51
DNAH5	59.8819	-1.69549	0.421504	-4.02247	5.75915e-05	0.000385192
GPRC5C	440.702	-1.69373	0.211552	-8.00617	1.18334e-15	2.82367e-14
WNT5A	1338.82	-1.68963	0.110295	-15.3192	5.69024e-53	8.85628e-51
PCDHGB7	26.0276	-1.68843	0.612154	-2.75818	0.00581237	0.0231958
FSCN1	6162.44	-1.68825	0.080256	-21.0358	3.08485e-98	1.48039e-95
UAP1L1	1286.42	-1.68695	0.117038	-14.4136	4.24788e-47	5.24188e-45
C4orf47	36.9681	-1.68506	0.612838	-2.7496	0.00596683	0.0237081
TGM1	1432.39	-1.68328	0.109091	-15.4301	1.02641e-53	1.70503e-51
FAM90A1	33.3308	-1.68048	0.54554	-3.08039	0.00206726	0.00944317
CYP4F3	218.78	-1.6748	0.240201	-6.97249	3.11369e-12	5.51149e-11
ACE2	59.5056	-1.67355	0.45384	-3.68752	0.000226448	0.00132885
DUSP7	2688.78	-1.66862	0.0908812	-18.3605	2.7217e-75	8.10692e-73
MLLT6	32.9394	-1.66811	0.627241	-2.65944	0.00782708	0.0297646
CYP2S1	1677.11	-1.66696	0.102223	-16.3071	8.7823e-60	1.82799e-57
BTN3A3	40.4514	-1.66207	0.531189	-3.12896	0.00175425	0.00818428
MYOM3	29.8129	-1.66122	0.573384	-2.89722	0.00376488	0.0159261
AJUBA	1288.2	-1.65987	0.124193	-13.3653	9.64774e-41	9.25969e-39
DLEU7-AS1	18.5721	-1.65869	0.731427	-2.26774	0.0233449	0.0741643
TLDC1	777.142	-1.65434	0.13108	-12.6209	1.6206e-36	1.3083e-34
PHLDB1	178.951	-1.65315	0.269308	-6.13853	8.32907e-10	1.15114e-08
PCP4L1	147.877	-1.64988	0.292521	-5.6402	1.69848e-08	1.98074e-07
RPS9	103.828	-1.64867	0.322163	-5.1175	3.09619e-07	3.04265e-06
DNM3OS	23.5575	-1.64838	0.64412	-2.55913	0.0104936	0.0381121
MIR21	61.3684	-1.64805	0.404309	-4.07621	4.57766e-05	0.000312337
JAG1	5416.55	-1.64621	0.0816267	-20.1676	1.88604e-90	7.75792e-88
LTB4R2	237.003	-1.644	0.2158	-7.61819	2.5726e-14	5.52103e-13
TCAF2P1	31.9185	-1.64162	0.614832	-2.67003	0.00758455	0.0289763
LY6D	715.213	-1.64134	0.13719	-11.964	5.48486e-33	3.82082e-31
FBXO2	16.2775	-1.64027	0.767126	-2.1382	0.0325007	0.0972432
FAM162A	2912.4	-1.64014	0.452575	-3.62402	0.000290057	0.00166038
DIRC3	91.4839	-1.63522	0.335592	-4.87264	1.10119e-06	9.98124e-06
PDK1	886.962	-1.6293	0.574664	-2.83522	0.00457942	0.0188546
RASSF9	650.904	-1.62853	0.145009	-11.2305	2.888e-29	1.65758e-27
PCDHB15	21.3642	-1.62715	0.707071	-2.30125	0.0213773	0.069147
MAFB	2193.75	-1.62687	0.0972018	-16.737	7.04535e-63	1.60152e-60
MOB3A	1080.03	-1.62425	0.121587	-13.3588	1.05231e-40	1.0044e-38
SOX7	122.393	-1.61782	0.291607	-5.54794	2.89052e-08	3.28098e-07
EDN1	420.007	-1.61762	0.518876	-3.11754	0.00182368	0.0084807
SH2D5	29.0297	-1.61563	0.582565	-2.77331	0.00554889	0.0222737
INSIG2	708.522	-1.61104	0.140773	-11.4443	2.51252e-30	1.53923e-28
ZNF395	3474.48	-1.60994	0.101276	-15.8966	6.69315e-57	1.25686e-54
TNS1	303.644	-1.60977	0.206735	-7.78667	6.87964e-15	1.53556e-13
PLA2G2F	42.0863	-1.60952	0.481816	-3.34053	0.000836181	0.00426132
OSMR	1175.87	-1.60931	0.140183	-11.48	1.66224e-30	1.03298e-28
CD68	566.669	-1.60744	0.166241	-9.66929	4.07176e-22	1.52921e-20
SH2D1B	36.1368	-1.60399	0.536476	-2.98986	0.00279108	0.0122538
IGFL2	29.0843	-1.60395	0.589928	-2.71889	0.00655014	0.0256425
PTPRH	119.039	-1.59822	0.331	-4.82845	1.37603e-06	1.22981e-05
LOC553103	27.7795	-1.59744	0.592207	-2.69744	0.00698742	0.0270236
NFKBIZ	1381.48	-1.5969	0.340344	-4.69202	2.7052e-06	2.29882e-05
SCN4B	128.891	-1.5968	0.304363	-5.24635	1.55139e-07	1.59725e-06
C11orf91	27.1565	-1.59641	0.65795	-2.42633	0.0152523	0.0521265
C20orf194	958.674	-1.59116	0.1217	-13.0745	4.6073e-39	4.10287e-37
EDARADD	481.808	-1.59009	0.159288	-9.98253	1.81778e-23	7.495e-22
RGS2	421.225	-1.58903	0.167828	-9.46822	2.84644e-21	1.00563e-19
SPSB1	1139.81	-1.58876	0.114818	-13.8372	1.5193e-43	1.64046e-41
FAM53B-AS1	22.7804	-1.58753	0.652438	-2.43322	0.0149652	0.0512976
TMEM91	61.4086	-1.58751	0.408038	-3.8906	9.99969e-05	0.000637706
IQCJ-SCHIP1-AS1	188.829	-1.58733	0.258217	-6.14727	7.88283e-10	1.09297e-08
SERPINB1	1124.38	-1.58653	0.124049	-12.7895	1.87735e-37	1.59769e-35
ALDOB	23.8174	-1.5834	0.648873	-2.44022	0.0146781	0.050544
RASSF5	331.231	-1.57827	0.192351	-8.20517	2.30273e-16	5.77387e-15
PTGER4	400.375	-1.5773	0.176441	-8.93949	3.90957e-19	1.19543e-17
ABCC5-AS1	59.2125	-1.57151	0.428456	-3.66785	0.000244599	0.00142135
PLA2G4E-AS1	87.3136	-1.57124	0.347912	-4.5162	6.29579e-06	5.01226e-05
CSTA	6328.58	-1.57112	0.10446	-15.0403	3.99501e-51	5.79982e-49
KRT6A	111841	-1.57089	0.225799	-6.95701	3.47563e-12	6.1333e-11
PFKP	4582.35	-1.56584	0.391045	-4.00425	6.22138e-05	0.000413228
CSPG4	96.1939	-1.56444	0.347874	-4.49715	6.88692e-06	5.43529e-05
KLK8	102.011	-1.56424	0.323759	-4.8315	1.35509e-06	1.21298e-05
LRRC8C	1420.18	-1.56318	0.109571	-14.2664	3.54541e-46	4.1667e-44
IMPA2	1915.18	-1.56206	0.11144	-14.0171	1.22575e-44	1.38406e-42
CTHRC1	720.494	-1.56135	0.143707	-10.8649	1.69465e-27	8.84494e-26
HLF	218.535	-1.55684	0.231018	-6.73902	1.5946e-11	2.62115e-10
STRC	20.5674	-1.55469	0.703381	-2.21031	0.0270834	0.0835372
BTBD19	67.1148	-1.55242	0.383729	-4.0456	5.21894e-05	0.000352472
DYRK3	123.181	-1.54944	0.286041	-5.41684	6.06613e-08	6.64965e-07
ICAM5	180.125	-1.54816	0.244337	-6.33618	2.35533e-10	3.47487e-09
SMIM2-AS1	20.2374	-1.54534	0.694605	-2.22478	0.0260962	0.0810276
PRNCR1	48.3024	-1.54528	0.45179	-3.42035	0.00062541	0.00330314
LINC00696	26.9913	-1.54498	0.602703	-2.56341	0.0103649	0.0377135
LGI4	103.602	-1.54427	0.321808	-4.79873	1.59674e-06	1.40383e-05
PLA2G4C	53.0211	-1.54302	0.432517	-3.56754	0.000360347	0.0020199
GBP3	420.22	-1.53938	0.209237	-7.35714	1.87897e-13	3.69716e-12
DNAH11	514.932	-1.53442	0.627505	-2.44527	0.0144743	0.0499478
DSC1	52.1033	-1.53424	0.437347	-3.50805	0.000451402	0.0024749
NR4A1	2549.3	-1.53345	0.114146	-13.4341	3.81808e-41	3.74779e-39
RAPGEFL1	2011.03	-1.53335	0.100013	-15.3315	4.70902e-53	7.46358e-51
ITGB4	17058.6	-1.53237	0.0795934	-19.2525	1.34535e-82	4.64844e-80
LOC102723354	76.509	-1.5281	0.365012	-4.18644	2.83359e-05	0.00020137
C22orf23	435.627	-1.52483	0.16901	-9.02215	1.8444e-19	5.71036e-18
ELL2	1538.48	-1.52466	0.112264	-13.5809	5.19552e-42	5.31111e-40
GNA15	482.577	-1.52299	0.168511	-9.03797	1.59612e-19	4.95947e-18
FABP5	218.692	-1.52136	0.220395	-6.90289	5.09563e-12	8.8032e-11
MIR4720	21.0321	-1.52048	0.67207	-2.26239	0.0236735	0.0748926
PRR5L	101.451	-1.52043	0.315435	-4.82011	1.4348e-06	1.27574e-05
ANKRD29	242.585	-1.51806	0.221409	-6.85637	7.06323e-12	1.20394e-10
SLC15A1	152.545	-1.51795	0.280554	-5.41056	6.28278e-08	6.85668e-07
UGT1A6	244.121	-1.51668	0.22669	-6.69054	2.22342e-11	3.57985e-10
PRRG1	207.006	-1.51651	0.22595	-6.71169	1.92383e-11	3.12663e-10
CACNB4	40.6897	-1.51644	0.516683	-2.93496	0.00333595	0.0143187
IFFO2	1773.05	-1.51368	0.10009	-15.1231	1.14026e-51	1.728e-49
AHDC1	2195.75	-1.51364	0.114338	-13.2384	5.26921e-40	4.89414e-38
ECM1	775.278	-1.50777	0.132101	-11.4138	3.56882e-30	2.14826e-28
SYT12	27.546	-1.50662	0.588888	-2.55841	0.0105151	0.0381377
SLC22A13	22.7919	-1.50438	0.647771	-2.3224	0.0202115	0.0659193
EGFR	2085.16	-1.50379	0.101273	-14.8488	7.08008e-50	9.94435e-48
HAP1	1266.47	-1.50358	0.110871	-13.5616	6.76698e-42	6.87684e-40
GDNF-AS1	50.0336	-1.50243	0.446837	-3.36236	0.000772786	0.00398408
BCL11B	835.089	-1.50039	0.129669	-11.5709	5.78488e-31	3.69058e-29
CCAT1	1225.23	-1.50011	0.150585	-9.96184	2.2387e-23	9.14322e-22
P4HA1	2571.31	-1.49747	0.443139	-3.37924	0.000726861	0.00377559
SDR9C7	131.989	-1.49049	0.280025	-5.32271	1.02235e-07	1.08157e-06
ITGA5	1769.49	-1.48487	0.403808	-3.67716	0.000235847	0.00137838
RIN2	905.989	-1.48362	0.138758	-10.6922	1.10748e-26	5.56188e-25
SAMD4A	58.739	-1.47977	0.414519	-3.56985	0.00035718	0.00200476
TMEM40	1060.94	-1.4771	0.12217	-12.0905	1.18505e-33	8.35632e-32
SYTL1	845.151	-1.47465	0.138355	-10.6584	1.59265e-26	7.95221e-25
AKAP6	96.1287	-1.47458	0.3209	-4.59515	4.32432e-06	3.54902e-05
FOS	1291.49	-1.47407	0.318148	-4.63328	3.59909e-06	2.99364e-05
GPR155	138.901	-1.47107	0.272144	-5.40547	6.46396e-08	7.03663e-07
MIR205	305.588	-1.47036	0.190353	-7.72436	1.12412e-14	2.47709e-13
IL1A	264.469	-1.46736	0.203852	-7.19818	6.10236e-13	1.13604e-11
GRAMD2	47.2346	-1.46707	0.459631	-3.19183	0.00141373	0.00677868
LOC100506990	430.529	-1.46656	0.195847	-7.4883	6.97709e-14	1.43838e-12
FXYD3	7766.18	-1.46651	0.0834021	-17.5837	3.28679e-69	8.35039e-67
REL	2096.12	-1.46231	0.131576	-11.1139	1.07396e-28	5.96582e-27
CARD6	87.8363	-1.46052	0.382963	-3.81373	0.000136887	0.000847015
CAV2	901.458	-1.4559	0.123746	-11.7653	5.89196e-32	3.89998e-30
TMEM132A	1579.85	-1.45557	0.103162	-14.1097	3.31154e-45	3.78875e-43
MRAP2	140.679	-1.45555	0.272051	-5.35028	8.78181e-08	9.3651e-07
ADH7	1211.14	-1.45525	0.120076	-12.1194	8.3328e-34	5.8999e-32
NNAT	280.06	-1.453	0.205233	-7.07977	1.44392e-12	2.61753e-11
SLC10A6	100.362	-1.45227	0.329834	-4.40305	1.06739e-05	8.2066e-05
CD247	28.4909	-1.44742	0.586616	-2.46741	0.0136096	0.0473457
SLC52A1	257.534	-1.44693	0.249822	-5.79187	6.96083e-09	8.49755e-08
GIPR	21.9856	-1.44681	0.663425	-2.18082	0.029197	0.0888981
MMP14	3809.99	-1.44679	0.0868199	-16.6643	2.38298e-62	5.21119e-60
EN1	468.414	-1.44642	0.165699	-8.72917	2.56538e-18	7.36205e-17
HSPG2	9285.4	-1.4457	0.0768048	-18.823	4.89507e-79	1.48364e-76
CACNA2D3	360.888	-1.444	0.180582	-7.9964	1.28107e-15	3.04426e-14
KCNIP4-IT1	33.0515	-1.44111	0.537175	-2.68275	0.00730199	0.0280893
PDLIM1	2187.7	-1.4385	0.108481	-13.2604	3.92661e-40	3.66682e-38
KIRREL	2049.87	-1.43778	0.108672	-13.2304	5.85413e-40	5.37957e-38
JUN	3282.91	-1.43709	0.10717	-13.4094	5.32524e-41	5.16847e-39
RIMS3	920.604	-1.43116	0.132022	-10.8403	2.21668e-27	1.14657e-25
SYDE1	36.24	-1.42698	0.53375	-2.67349	0.00750662	0.0287485
RRAS	296.503	-1.42597	0.195799	-7.28283	3.26887e-13	6.24701e-12
MBP	275.213	-1.42226	0.197511	-7.20089	5.98222e-13	1.11608e-11
DQX1	219.129	-1.41998	0.23964	-5.92547	3.11403e-09	3.9762e-08
ANGPTL4	82.948	-1.41841	0.36309	-3.90649	9.36468e-05	0.000602324
TTC22	653.512	-1.413	0.14791	-9.55312	1.25853e-21	4.58698e-20
PLXNB3	889.435	-1.40952	0.146596	-9.61498	6.91195e-22	2.54607e-20
CDA	128.81	-1.40845	0.303536	-4.64015	3.48158e-06	2.90289e-05
LOC100130476	76.9926	-1.4051	0.375486	-3.74207	0.000182507	0.00109327
OAS2	243.348	-1.40499	0.226884	-6.19254	5.92031e-10	8.34932e-09
JAG2	1711.13	-1.40238	0.114203	-12.2797	1.16405e-34	8.55749e-33
PFKM	827.073	-1.40074	0.126554	-11.0683	1.78737e-28	9.83393e-27
GEM	39.1102	-1.39682	0.554849	-2.51748	0.0118197	0.0420244
BTG2	2060.99	-1.39672	0.0960286	-14.5449	6.29609e-48	8.17828e-46
EPGN	34.6461	-1.39661	0.572226	-2.44066	0.0146605	0.0505034
ANKRD35	151.354	-1.39566	0.279804	-4.988	6.1007e-07	5.77194e-06
TIPARP	2745.78	-1.39363	0.107208	-12.9994	1.23351e-38	1.09282e-36
SOWAHC	2924.59	-1.3932	0.10359	-13.4493	3.1097e-41	3.0699e-39
IRX6	40.9663	-1.38809	0.492329	-2.81944	0.0048108	0.0196435
RHBDL2	200.587	-1.38642	0.24277	-5.71085	1.12415e-08	1.34121e-07
HRNR	43.7863	-1.38527	0.476398	-2.9078	0.00363985	0.0154463
DIRAS2	32.3143	-1.38523	0.577087	-2.40039	0.0163775	0.0553562
ENO2	2799.67	-1.38298	0.253102	-5.4641	4.65257e-08	5.16567e-07
LINC00622	27.5057	-1.38235	0.598758	-2.3087	0.0209603	0.067989
ITGA3	5295.46	-1.38182	0.0908752	-15.2057	3.24367e-52	4.95909e-50
IL17RE	220.606	-1.38179	0.218503	-6.32389	2.55055e-10	3.75007e-09
ARHGAP23	381.53	-1.38043	0.551609	-2.50255	0.0123303	0.0435442
LOC103021296	24.009	-1.37939	0.627826	-2.1971	0.0280136	0.0859461
C2orf81	166.792	-1.37758	0.249345	-5.5248	3.29856e-08	3.71971e-07
NUAK2	561.941	-1.37565	0.146747	-9.37434	6.96127e-21	2.38144e-19
SH3BGRL3	2599.87	-1.37548	0.101943	-13.4926	1.72994e-41	1.71761e-39
ACSL6	31.0057	-1.3716	0.557487	-2.46032	0.0138813	0.0481455
PRR9	38.0198	-1.37099	0.501845	-2.7319	0.00629698	0.0248145
IFNGR1	1354.01	-1.37044	0.112754	-12.1542	5.44801e-34	3.87324e-32
FGF1	38.0489	-1.36694	0.499422	-2.73705	0.00619937	0.0245025
PTK2B	1899.03	-1.36544	0.122247	-11.1695	5.75016e-29	3.2464e-27
ETS2	3120.53	-1.36541	0.105307	-12.966	1.9065e-38	1.67717e-36
NID1	1910.95	-1.36343	0.0994258	-13.713	8.48701e-43	8.99518e-41
ABCC5	8996.97	-1.3597	0.0808955	-16.8081	2.12919e-63	4.90453e-61
SH3BP1	1319.37	-1.35833	0.114309	-11.883	1.45064e-32	9.86663e-31
TINAGL1	4057.4	-1.35673	0.0900829	-15.0609	2.92804e-51	4.36076e-49
LOC100505736	34.2673	-1.35495	0.526574	-2.57314	0.0100782	0.0368643
RTN1	52.8518	-1.35467	0.429091	-3.15707	0.00159362	0.00752353
IFI16	2620.2	-1.35371	0.127175	-10.6445	1.85026e-26	9.21183e-25
ODF3B	242.355	-1.35298	0.223183	-6.06219	1.34282e-09	1.79694e-08
SRPX2	62.3873	-1.34855	0.398962	-3.38015	0.000724469	0.00376532
CKMT1B	457.738	-1.34815	0.166123	-8.1154	4.84189e-16	1.1901e-14
BACH1-IT2	27.992	-1.3477	0.587753	-2.29297	0.0218498	0.0703755
FAM230C	25.2038	-1.34765	0.63304	-2.12886	0.033266	0.0991412
LIMA1	3340.71	-1.34765	0.0914754	-14.7323	3.99605e-49	5.43589e-47
MN1	206.139	-1.34126	0.231581	-5.79177	6.96488e-09	8.49755e-08
ERRFI1	2910.59	-1.34074	0.119552	-11.2147	3.45432e-29	1.97606e-27
SLC37A2	742.502	-1.33718	0.132006	-10.1296	4.08143e-24	1.78962e-22
LINC00673	311.813	-1.33634	0.186124	-7.17985	6.97904e-13	1.29228e-11
OR7E91P	35.8383	-1.33428	0.526876	-2.53244	0.0113271	0.0405822
NLRX1	753.097	-1.33244	0.138646	-9.61036	7.2297e-22	2.65745e-20
PRCP	909.151	-1.33027	0.12506	-10.6371	2.00341e-26	9.91718e-25
CCDC88B	75.6063	-1.33016	0.358393	-3.71145	0.000206077	0.00122175
CXADR	3850.29	-1.32896	0.0909749	-14.608	2.49823e-48	3.31995e-46
MMP2	103.412	-1.32846	0.345093	-3.84958	0.00011832	0.000741422
OAF	323.663	-1.32748	0.189144	-7.01837	2.24477e-12	4.00626e-11
MYC	2739.37	-1.32546	0.0994226	-13.3316	1.5156e-40	1.43866e-38
SPARCL1	70.7183	-1.32278	0.441835	-2.99384	0.00275494	0.0121228
STON1	928.369	-1.31707	0.122076	-10.7889	3.88349e-27	1.99084e-25
RTN4RL1	69.4853	-1.31527	0.391378	-3.36061	0.000777716	0.00400233
EPPK1	11920.9	-1.31499	0.0925134	-14.2141	7.49504e-46	8.69022e-44
PANX2	392.185	-1.31255	0.169757	-7.7319	1.0595e-14	2.33767e-13
FBLN2	1313.48	-1.31146	0.115318	-11.3725	5.73086e-30	3.42582e-28
SLC7A8	4411.24	-1.31096	0.0830636	-15.7826	4.10083e-56	7.53681e-54
NR4A3	113.989	-1.3078	0.29717	-4.40083	1.07836e-05	8.27619e-05
TRANK1	156.401	-1.30577	0.266802	-4.89414	9.87364e-07	9.02524e-06
LOC105747689	33.6205	-1.30326	0.550738	-2.36639	0.0179624	0.059817
KRT19	58190.4	-1.30307	0.0879606	-14.8143	1.18483e-49	1.65073e-47
AK4	1527.39	-1.30191	0.140677	-9.25462	2.14997e-20	7.1155e-19
CALD1	117.993	-1.30079	0.298484	-4.35797	1.31274e-05	9.8776e-05
MIR31HG	104.12	-1.29895	0.327423	-3.96719	7.27238e-05	0.000477528
CLU	140.492	-1.29776	0.278886	-4.65338	3.26537e-06	2.73316e-05
LOC100130691	100.844	-1.29776	0.310953	-4.17349	2.99964e-05	0.000212124
LINC00578	27.2686	-1.29442	0.586193	-2.20819	0.0272314	0.0839189
SSBP2	548.78	-1.29431	0.159092	-8.1356	4.099e-16	1.01163e-14
CDK18	767.902	-1.29284	0.141729	-9.1219	7.38159e-20	2.3399e-18
MTSS1	2752.13	-1.2911	0.0896181	-14.4067	4.69544e-47	5.75308e-45
CD37	60.6332	-1.28852	0.409325	-3.14793	0.00164433	0.00773622
PHF21A	1020.2	-1.28379	0.130116	-9.86654	5.81356e-23	2.31417e-21
APOBEC3C	639.306	-1.28322	0.139789	-9.17969	4.32324e-20	1.39344e-18
ITM2B	4685.45	-1.28314	0.0828959	-15.4789	4.81368e-54	8.07389e-52
ERAP2	623.847	-1.28212	0.146478	-8.75298	2.07792e-18	6.0131e-17
MAPKBP1	1989.73	-1.28212	0.100335	-12.7784	2.16569e-37	1.83405e-35
FZD6	5884.78	-1.28147	0.079013	-16.2185	3.73093e-59	7.583e-57
AHNAK	27818.9	-1.28025	0.249112	-5.13926	2.75816e-07	2.74323e-06
CBR1	772.61	-1.27934	0.140678	-9.09409	9.53813e-20	3.00695e-18
ANKZF1	1106.51	-1.27858	0.128195	-9.97371	1.98658e-23	8.17145e-22
PLEKHA1	2190.94	-1.27742	0.104459	-12.2289	2.17807e-34	1.59442e-32
B3GALT5	45.978	-1.27494	0.511758	-2.4913	0.0127277	0.0446828
TLDC2	41.209	-1.27303	0.485872	-2.62009	0.00879053	0.0328144
SPRR1A	3103.93	-1.27274	0.0987568	-12.8876	5.28633e-38	4.61245e-36
HMCN1	72.9747	-1.27203	0.38763	-3.28155	0.00103239	0.00514142
SGK223	962.835	-1.27184	0.123107	-10.3312	5.09198e-25	2.35211e-23
KIAA0922	187.087	-1.27049	0.233738	-5.43552	5.46378e-08	6.0276e-07
PHEX	225.359	-1.27047	0.220975	-5.74939	8.95653e-09	1.08129e-07
TCTEX1D4	43.0896	-1.27019	0.473703	-2.68141	0.00733126	0.0281831
FBLIM1	769.374	-1.26837	0.130164	-9.74439	1.94942e-22	7.43449e-21
LMO1	32.741	-1.2649	0.538317	-2.34973	0.0187869	0.0620746
C16orf74	189.819	-1.26326	0.234721	-5.38197	7.36746e-08	7.95502e-07
TAPBP	54.6366	-1.26156	0.442317	-2.85215	0.00434244	0.0180163
ADA	244.574	-1.25857	0.20773	-6.05868	1.37242e-09	1.83008e-08
APOL1	2078.13	-1.25771	0.291072	-4.32095	1.55356e-05	0.000115438
C1orf111	35.3333	-1.2576	0.5252	-2.39452	0.0166419	0.0560535
HIVEP3	1052.16	-1.25551	0.13546	-9.2685	1.8879e-20	6.30859e-19
TPI1P3	93.6429	-1.25518	0.376446	-3.33428	0.000855199	0.00434926
FAM83H-AS1	40.0994	-1.25448	0.553312	-2.26722	0.0233766	0.0742107
IGFBP2	7294.44	-1.25402	0.329342	-3.80765	0.000140293	0.000864374
PCDHGB2	32.4475	-1.25313	0.549507	-2.28046	0.0225803	0.0721425
BBOX1	36.7936	-1.25148	0.50579	-2.47431	0.0133492	0.0465902
NYAP1	27.5004	-1.24785	0.585291	-2.13201	0.0330057	0.0984643
VANGL2	503.821	-1.24758	0.169195	-7.3736	1.66084e-13	3.29802e-12
BMP7	1863.67	-1.24747	0.109851	-11.356	6.92768e-30	4.09872e-28
SLC2A9	283.824	-1.24214	0.198598	-6.25453	3.98721e-10	5.73548e-09
BCO2	40.0903	-1.24204	0.497448	-2.49682	0.0125311	0.0441378
CCDC146	323.703	-1.23808	0.199573	-6.20367	5.51605e-10	7.7983e-09
CLIP2	1499.15	-1.237	0.106551	-11.6095	3.68612e-31	2.36734e-29
PAG1	198.784	-1.235	0.23101	-5.34608	8.98805e-08	9.56732e-07
AGBL2	35.4814	-1.23493	0.522711	-2.36254	0.01815	0.060323
FOSL1	507.021	-1.2326	0.166846	-7.38768	1.4941e-13	2.98061e-12
ERO1A	5810.88	-1.23256	0.29233	-4.21632	2.48316e-05	0.000178227
ANKRD22	257.791	-1.23161	0.202292	-6.0883	1.14118e-09	1.54144e-08
FGL2	45.6215	-1.22951	0.467468	-2.63014	0.00853496	0.0319779
LAMA3	3621.5	-1.22891	0.107452	-11.4369	2.73457e-30	1.66347e-28
SLFN5	1785.63	-1.22747	0.135524	-9.05721	1.33834e-19	4.18105e-18
PKP1	48351.7	-1.22526	0.0725673	-16.8845	5.84747e-64	1.36515e-61
LDHA	29348.6	-1.22489	0.40785	-3.00328	0.00267087	0.0118101
TRAF3IP2	425.038	-1.2246	0.173104	-7.07439	1.50112e-12	2.71835e-11
RCAN1	836.747	-1.22365	0.129987	-9.41366	4.7916e-21	1.65229e-19
CASC9	89.1393	-1.22096	0.338283	-3.60928	0.000307051	0.00174666
FUT11	492.664	-1.21936	0.176238	-6.91885	4.55323e-12	7.91365e-11
CDCP1	2791.47	-1.21809	0.0922109	-13.2098	7.69986e-40	7.03825e-38
TNNT2	151.248	-1.21467	0.262879	-4.62064	3.82563e-06	3.16763e-05
C1RL	494.176	-1.21406	0.182955	-6.63583	3.2268e-11	5.10497e-10
ACKR3	1066.15	-1.21398	0.47375	-2.56249	0.0103925	0.0378044
TRIM47	642.918	-1.21225	0.164642	-7.3629	1.79955e-13	3.55302e-12
PLA2G4E	687.408	-1.2118	0.140258	-8.63976	5.63291e-18	1.56454e-16
SOCS3	550.666	-1.2102	0.17466	-6.92893	4.24045e-12	7.41478e-11
NCKAP5L	401.822	-1.21003	0.173986	-6.95478	3.53115e-12	6.22491e-11
THBS1	176.13	-1.20507	0.256058	-4.70623	2.52339e-06	2.15599e-05
PYROXD2	63.8266	-1.20335	0.397878	-3.02441	0.00249117	0.0111438
EGFR-AS1	55.6098	-1.2023	0.419163	-2.86834	0.00412629	0.0172313
EDAR	263.284	-1.20064	0.211369	-5.68032	1.34446e-08	1.58329e-07
PRKCA	229.773	-1.19768	0.215051	-5.56929	2.55773e-08	2.91665e-07
SPATA1	41.534	-1.1965	0.478171	-2.50225	0.0123407	0.043572
NOTCH3	14519.5	-1.19643	0.0804321	-14.875	4.78864e-50	6.83707e-48
ARSJ	288.894	-1.19627	0.201544	-5.93554	2.92884e-09	3.7564e-08
LYRM9	40.811	-1.19317	0.513739	-2.32252	0.020205	0.0659104
LINC01503	298.913	-1.1876	0.193891	-6.1251	9.06248e-10	1.24652e-08
SNX33	997.423	-1.18644	0.121172	-9.79137	1.22617e-22	4.77104e-21
NOV	138.959	-1.18601	0.26928	-4.40437	1.06092e-05	8.16415e-05
SHC1	4120.75	-1.18597	0.0851356	-13.9304	4.14204e-44	4.61664e-42
APCDD1	117.936	-1.18582	0.29475	-4.02315	5.74251e-05	0.000384228
GSTM1	218.322	-1.18575	0.216316	-5.4816	4.21508e-08	4.70411e-07
NTN5	36.6016	-1.18552	0.521568	-2.27299	0.0230268	0.0733226
AUTS2	721.696	-1.18487	0.134128	-8.83387	1.01115e-18	2.9861e-17
PLAU	118.41	-1.18316	0.293836	-4.02658	5.65934e-05	0.000379545
MID1	1844.31	-1.18246	0.100568	-11.7578	6.43913e-32	4.24589e-30
SLC39A11	576.541	-1.18219	0.14806	-7.98455	1.4104e-15	3.33325e-14
DSG3	6084.35	-1.18003	0.0953326	-12.3781	3.43463e-35	2.63719e-33
ASCL2	293.165	-1.17895	0.195966	-6.01608	1.78689e-09	2.34997e-08
PCYT1B	37.6646	-1.1762	0.518779	-2.26724	0.0233757	0.0742107
DGKA	1604.65	-1.17543	0.108913	-10.7923	3.74132e-27	1.92366e-25
SLC44A5	624.608	-1.17454	0.140148	-8.38075	5.25895e-17	1.37657e-15
MYOM1	68.9406	-1.17335	0.37695	-3.11276	0.00185348	0.00860309
GPX8	298.67	-1.1728	0.192288	-6.0992	1.06599e-09	1.44667e-08
NRG4	53.0545	-1.16925	0.42316	-2.76314	0.00572481	0.0228939
PROS1	545.449	-1.16791	0.168001	-6.95182	3.60592e-12	6.35025e-11
JUNB	12811	-1.16706	0.088443	-13.1956	9.29835e-40	8.41038e-38
IRF1	855.451	-1.16451	0.146354	-7.95681	1.76525e-15	4.11003e-14
LOC100129550	426.969	-1.16293	0.186477	-6.2363	4.48053e-10	6.39716e-09
DZIP1L	72.7372	-1.16258	0.36338	-3.19936	0.00137735	0.00661708
BRWD3	2854.89	-1.1623	0.116932	-9.93994	2.78993e-23	1.13409e-21
MOB3C	1241.16	-1.16142	0.137008	-8.47704	2.30988e-17	6.17732e-16
LOC729732	332.297	-1.16134	0.204187	-5.68766	1.28794e-08	1.51984e-07
PARD6G	526.306	-1.16019	0.154162	-7.52576	5.24136e-14	1.10024e-12
GCSAM	161.404	-1.15913	0.277662	-4.1746	2.98504e-05	0.000211178
GAS6	36.7421	-1.15885	0.51198	-2.26346	0.0236075	0.074724
GLTP	5696.55	-1.15845	0.0838899	-13.8092	2.24368e-43	2.40756e-41
CALML3	4453.57	-1.1549	0.0852979	-13.5397	9.12163e-42	9.16194e-40
SERTAD1	930.402	-1.15388	0.12268	-9.40561	5.17317e-21	1.77677e-19
FAM13A-AS1	57.597	-1.15315	0.422862	-2.72702	0.00639096	0.0251218
C14orf132	73.9598	-1.15296	0.363385	-3.17283	0.00150958	0.007179
PNPLA7	95.799	-1.15235	0.346189	-3.32867	0.000872611	0.0044183
HEG1	379.761	-1.15216	0.192089	-5.99803	1.99723e-09	2.5982e-08
PUS10	272.693	-1.15214	0.197993	-5.81908	5.91729e-09	7.27077e-08
FAM66C	66.0413	-1.15001	0.378824	-3.03573	0.00239954	0.0107702
LPIN3	1439.42	-1.14937	0.121993	-9.4216	4.4428e-21	1.53815e-19
DIXDC1	210.398	-1.14937	0.22672	-5.06955	3.98762e-07	3.84217e-06
ALDH3A1	2013.28	-1.14849	0.10275	-11.1776	5.25161e-29	2.98444e-27
S100A2	5745.29	-1.14517	0.230568	-4.96672	6.80962e-07	6.39712e-06
LAMB3	10217.1	-1.14408	0.0927088	-12.3406	5.47803e-35	4.12758e-33
DANT2	92.7907	-1.14407	0.321486	-3.5587	0.000372696	0.00208036
RGL1	505.782	-1.1436	0.156955	-7.28617	3.189e-13	6.11467e-12
SOD2	1431.65	-1.14109	0.132	-8.64459	5.40007e-18	1.50713e-16
LDB1	1426.5	-1.13986	0.109146	-10.4435	1.56963e-25	7.47024e-24
CLSTN1	8861.24	-1.13903	0.079179	-14.3856	6.37642e-47	7.75768e-45
SEC14L2	440.248	-1.13881	0.165378	-6.88611	5.73405e-12	9.84706e-11
KIAA1614	112.717	-1.13842	0.306388	-3.71561	0.000202712	0.00120346
SSPO	94.7304	-1.13779	0.362437	-3.13927	0.00169368	0.00794031
TNFRSF10D	92.9804	-1.1376	0.338495	-3.36077	0.000777253	0.00400114
CLIP4	664.004	-1.13746	0.140554	-8.09273	5.83418e-16	1.42361e-14
WNT7B	1036.14	-1.13574	0.12285	-9.2449	2.35457e-20	7.76288e-19
EXT1	1503.54	-1.13556	0.11472	-9.8985	4.22557e-23	1.6977e-21
FANCE	810.541	-1.1323	0.131544	-8.60772	7.45254e-18	2.04365e-16
LOC401585	74.0324	-1.13085	0.359427	-3.14626	0.00165371	0.00777188
ZP3	118.823	-1.12917	0.291707	-3.87092	0.000108426	0.000685639
AGTRAP	540.845	-1.12871	0.154837	-7.28971	3.10615e-13	5.96905e-12
SLC5A10	316.003	-1.12853	0.18634	-6.05629	1.39298e-09	1.85545e-08
TRERF1	351.655	-1.12757	0.175698	-6.41765	1.38391e-10	2.08444e-09
IL1RAP	1269.54	-1.12743	0.125806	-8.96159	3.20019e-19	9.80257e-18
PML	1833.23	-1.12592	0.11782	-9.55632	1.22019e-21	4.45666e-20
EFEMP1	41.3803	-1.12565	0.501339	-2.24528	0.0247502	0.0776439
PRAM1	40.7649	-1.12255	0.48221	-2.32794	0.0199155	0.0651137
GYS1	2602.78	-1.12078	0.110595	-10.1341	3.89874e-24	1.71823e-22
LOC103344931	83.361	-1.12007	0.348402	-3.21486	0.00130506	0.00630842
BCKDHA	1290.09	-1.11741	0.121949	-9.16289	5.05259e-20	1.62548e-18
NOTCH1	5411.09	-1.11689	0.0816448	-13.6799	1.33905e-42	1.41058e-40
SFN	17260.5	-1.11547	0.0889554	-12.5397	4.52929e-36	3.63944e-34
ZNF846	100.051	-1.1151	0.314084	-3.5503	0.000384785	0.00214437
TGFBI	39.3372	-1.11424	0.514516	-2.16561	0.0303406	0.0917565
NRXN2	867.388	-1.11419	0.129172	-8.62563	6.374e-18	1.76188e-16
C9orf9	70.2838	-1.114	0.373436	-2.9831	0.00285344	0.01248
PDK3	2327.47	-1.113	0.299263	-3.71913	0.000199907	0.00118803
PP14571	140.996	-1.11139	0.275616	-4.0324	5.52108e-05	0.000370993
BLCAP	2456.15	-1.11125	0.0950987	-11.6852	1.51683e-31	9.81453e-30
CAPN12	276.891	-1.10781	0.214363	-5.16792	2.36719e-07	2.37765e-06
ATP1B3	8285.11	-1.10631	0.0763177	-14.4962	1.28105e-47	1.63936e-45
BBS4	83.5865	-1.10511	0.35972	-3.07214	0.00212531	0.00968016
FLNA	22237.4	-1.10414	0.0880965	-12.5333	4.90927e-36	3.9265e-34
PPP2R5B	310.423	-1.10255	0.189569	-5.81609	6.02397e-09	7.39659e-08
CKMT1A	147.144	-1.10111	0.264164	-4.16829	3.06899e-05	0.000216319
FAM83B	1752.33	-1.10048	0.1051	-10.4708	1.17646e-25	5.66144e-24
IMMP2L	57.9329	-1.10004	0.445814	-2.46749	0.0136066	0.0473449
PPP1R13L	2611.54	-1.09662	0.0921293	-11.903	1.1412e-32	7.79266e-31
EPO	54.2844	-1.09634	0.416042	-2.63518	0.00840935	0.031562
LOXL4	86.7905	-1.09408	0.332141	-3.29402	0.000987667	0.00494291
OSR2	297.597	-1.09132	0.205425	-5.31251	1.08128e-07	1.13904e-06
PVRL1	7927.28	-1.0913	0.0786711	-13.8717	9.40558e-44	1.02842e-41
CFAP43	45.4517	-1.09079	0.459526	-2.37372	0.01761	0.0588454
PHLDA3	1302.71	-1.09077	0.110749	-9.84904	6.91992e-23	2.7232e-21
KCNMA1	178.2	-1.09045	0.243154	-4.48458	7.30577e-06	5.74225e-05
MAST4	2040.74	-1.09012	0.113041	-9.64358	5.23297e-22	1.94419e-20
GEMIN8P4	123.383	-1.08979	0.286941	-3.79797	0.000145888	0.000894377
FAM151A	61.6851	-1.08905	0.397762	-2.73796	0.00618225	0.0244516
GDNF	117.185	-1.0888	0.289763	-3.75754	0.000171589	0.00103505
TNFAIP8L3	74.6709	-1.08791	0.361538	-3.00911	0.00262016	0.0116365
MICALCL	56.6207	-1.08737	0.4224	-2.57427	0.0100452	0.0367672
FAM83G	1037	-1.08461	0.130883	-8.28687	1.16263e-16	2.96686e-15
IRS1	350.766	-1.08239	0.179545	-6.02848	1.65508e-09	2.19022e-08
NFASC	656.919	-1.08185	0.143274	-7.55092	4.32189e-14	9.15012e-13
PCDHGC3	94.3955	-1.08142	0.324596	-3.33159	0.000863514	0.00438251
C10orf10	142.222	-1.08129	0.283631	-3.81232	0.000137671	0.000851255
TGFB1	796.187	-1.08114	0.129244	-8.36511	6.0058e-17	1.56731e-15
BMP1	1602.03	-1.08086	0.10185	-10.6123	2.61337e-26	1.28996e-24
MPP7	793.641	-1.08074	0.130378	-8.28929	1.13929e-16	2.91158e-15
DENND2C	933.838	-1.07954	0.129524	-8.33465	7.77249e-17	2.00414e-15
CREG2	64.4192	-1.07843	0.390743	-2.75994	0.00578111	0.0230977
HILPDA	592.834	-1.07639	0.155002	-6.94433	3.80251e-12	6.67603e-11
SLA2	58.2581	-1.073	0.400852	-2.6768	0.0074328	0.0284985
NTN4	110.95	-1.07222	0.325068	-3.29844	0.000972241	0.00487136
RDH10-AS1	105.385	-1.07147	0.323458	-3.31256	0.000924478	0.00464812
COL4A5	2624.67	-1.0714	0.121691	-8.80427	1.31705e-18	3.86306e-17
FOXQ1	4479.87	-1.0703	0.235844	-4.53818	5.67426e-06	4.56796e-05
PRRG4	1900.35	-1.06975	0.0997456	-10.7248	7.78579e-27	3.9445e-25
LPAR6	167.785	-1.06887	0.252451	-4.23398	2.29595e-05	0.000165615
TNRC6C-AS1	198.743	-1.06658	0.226759	-4.70358	2.55634e-06	2.1808e-05
PGK1	27137.7	-1.06582	0.449655	-2.3703	0.0177738	0.0593239
CPT1A	2038.03	-1.06578	0.106495	-10.0078	1.40785e-23	5.87486e-22
BCL10	2330.71	-1.06446	0.114277	-9.31477	1.22214e-20	4.11573e-19
DEF6	381.96	-1.06182	0.169803	-6.25322	4.02086e-10	5.77426e-09
C21orf91	999.123	-1.06096	0.139263	-7.61837	2.56901e-14	5.52018e-13
STEAP3	919.357	-1.06003	0.129052	-8.21391	2.14094e-16	5.38382e-15
SH3RF3-AS1	53.2502	-1.05683	0.41854	-2.52505	0.0115682	0.0413176
WDR72	85.285	-1.05683	0.334354	-3.1608	0.00157337	0.00744498
DLX4	286.908	-1.05662	0.205011	-5.15397	2.55026e-07	2.54967e-06
NEIL2	256.761	-1.0549	0.202187	-5.21746	1.81395e-07	1.85431e-06
RAB20	96.937	-1.05488	0.328385	-3.21232	0.00131669	0.00635752
RALGDS	2017.21	-1.0542	0.111597	-9.44645	3.50519e-21	1.22831e-19
GNG12-AS1	56.3132	-1.05365	0.411002	-2.56363	0.0103585	0.0377135
PMP22	93.4779	-1.05253	0.33272	-3.16342	0.00155927	0.0073985
GPR153	428.047	-1.05133	0.16122	-6.52113	6.97812e-11	1.06874e-09
ERMP1	4296.03	-1.05109	0.107326	-9.79345	1.20129e-22	4.69538e-21
PLIN4	92.1195	-1.04588	0.331691	-3.1532	0.00161494	0.00761246
KDM7A	2199.33	-1.04464	0.269207	-3.88044	0.000104266	0.000661515
LBX2-AS1	39.9297	-1.04445	0.489906	-2.13194	0.0330115	0.0984645
CMIP	2715.54	-1.04404	0.0939111	-11.1173	1.03315e-28	5.75764e-27
IZUMO4	46.2428	-1.04307	0.485466	-2.14859	0.0316672	0.0951118
DDR1	94.4434	-1.04249	0.365808	-2.84982	0.00437435	0.0181226
NCK1	1127.69	-1.04234	0.123822	-8.41799	3.82996e-17	1.00863e-15
HSPB1	24063.4	-1.04174	0.0814125	-12.7959	1.72941e-37	1.47908e-35
KIAA1467	578.56	-1.04103	0.157741	-6.59964	4.12146e-11	6.46706e-10
NIPAL1	108.486	-1.04037	0.312748	-3.32654	0.000879299	0.00444825
TNKS1BP1	3544.25	-1.03974	0.10382	-10.0148	1.31254e-23	5.50376e-22
FGD6	2119.63	-1.03913	0.107804	-9.63899	5.47216e-22	2.02869e-20
CACNA1D	358.925	-1.0369	0.181713	-5.70626	1.15489e-08	1.3722e-07
OLFM2	423.592	-1.03651	0.168277	-6.15954	7.29571e-10	1.0181e-08
CLYBL	52.7922	-1.03558	0.422106	-2.45336	0.014153	0.0489895
TGIF2	549.507	-1.03535	0.149843	-6.90958	4.861e-12	8.40626e-11
RXRA	4320.64	-1.0302	0.0836304	-12.3184	7.20753e-35	5.34409e-33
RRAGD	1126.26	-1.02926	0.123399	-8.34088	7.37404e-17	1.90995e-15
CDC42EP4	2551.72	-1.02871	0.0913074	-11.2665	1.92128e-29	1.11383e-27
ALS2CL	935.327	-1.02852	0.123369	-8.33695	7.62317e-17	1.97153e-15
SMAD3	1413.54	-1.02728	0.127136	-8.08016	6.4683e-16	1.57168e-14
NCALD	1097.58	-1.02683	0.150114	-6.84032	7.9014e-12	1.33828e-10
FEM1B	4454.92	-1.02492	0.0875521	-11.7064	1.18174e-31	7.67509e-30
UST	144.33	-1.02464	0.282311	-3.62946	0.000284017	0.00162959
MAPK6	3542.17	-1.02412	0.101295	-10.1103	4.97427e-24	2.14839e-22
PGAM1	2177.12	-1.02166	0.114881	-8.89314	5.94064e-19	1.77561e-17
NCK1-AS1	127.202	-1.02075	0.282093	-3.61849	0.000296324	0.00169177
LIMCH1	810.807	-1.01803	0.135462	-7.5152	5.68228e-14	1.18559e-12
LOC100129617	56.7403	-1.01538	0.408017	-2.48858	0.0128254	0.0450164
SPTSSA	1157.23	-1.01388	0.114655	-8.84291	9.32591e-19	2.75881e-17
ITPRIP	539.79	-1.01374	0.158961	-6.3773	1.80241e-10	2.68203e-09
ALDOA	28215.1	-1.01299	0.277642	-3.64856	0.000263712	0.00152269
GCNT2	65.0014	-1.01224	0.407176	-2.48599	0.012919	0.0452991
SMAD7	234.582	-1.00902	0.209359	-4.81955	1.4388e-06	1.27864e-05
LINC00963	644.927	-1.00713	0.151548	-6.64564	3.01911e-11	4.81135e-10
IPPK	1001.43	-1.00622	0.124948	-8.0531	8.07201e-16	1.94223e-14
HK1	3881.54	-1.00454	0.0938016	-10.7092	9.21604e-27	4.65545e-25
TBC1D8B	834.163	-1.00079	0.157061	-6.37198	1.86598e-10	2.77185e-09
CIB1	1184.3	-1.00053	0.112061	-8.92848	4.31905e-19	1.31135e-17
CBWD3	81.0869	-0.998407	0.371936	-2.68435	0.00726711	0.0279801
RMDN2	107.466	-0.998018	0.314561	-3.17274	0.0015101	0.007179
CCL28	455.552	-0.998013	0.167251	-5.96717	2.41398e-09	3.12858e-08
HDAC11	426.696	-0.997445	0.17306	-5.76357	8.23525e-09	9.96304e-08
PRICKLE2	213.305	-0.996989	0.218841	-4.55577	5.21932e-06	4.23527e-05
PLEKHO2	222.012	-0.996727	0.230792	-4.31872	1.56937e-05	0.000116512
C1orf145	112.435	-0.996058	0.301097	-3.30809	0.00093933	0.00471466
BNIP3L	7530.17	-0.995921	0.379328	-2.62549	0.0086524	0.0323828
NFATC1	486.302	-0.995221	0.157774	-6.30788	2.8288e-10	4.13455e-09
KRT16	17175.9	-0.994766	0.0973664	-10.2167	1.66876e-24	7.50768e-23
APOL2	1522.39	-0.994044	0.107549	-9.24271	2.40339e-20	7.90875e-19
EFNA3	656.913	-0.992658	0.140434	-7.0685	1.56618e-12	2.83027e-11
SLC27A1	805.35	-0.992425	0.149585	-6.63451	3.25573e-11	5.14603e-10
PCDHB13	59.3085	-0.990691	0.428309	-2.31303	0.0207209	0.0673139
CELSR2	7606.68	-0.989443	0.0839988	-11.7792	4.99403e-32	3.31834e-30
LINC00998	283.247	-0.989133	0.192902	-5.12764	2.93392e-07	2.89968e-06
EMILIN3	152.336	-0.987753	0.262768	-3.75903	0.000170576	0.00103002
DYNC2H1	290.956	-0.987413	0.189312	-5.21579	1.83037e-07	1.86778e-06
TMPRSS11D	1312.68	-0.987095	0.127528	-7.74022	9.92436e-15	2.19812e-13
OTUD1	768.042	-0.986245	0.132454	-7.44594	9.62549e-14	1.96097e-12
LOC284930	121.557	-0.983872	0.284899	-3.45341	0.000553553	0.00296993
NPHP1	57.6074	-0.983281	0.414926	-2.36977	0.0177989	0.0593963
PPFIBP1	1855.99	-0.982869	0.0994856	-9.87951	5.10842e-23	2.04763e-21
LOC100507291	79.9962	-0.981024	0.347306	-2.82467	0.00473297	0.0193898
CRABP2	99.9986	-0.980957	0.313491	-3.12914	0.00175319	0.00818154
CTSB	12243.2	-0.979831	0.080165	-12.2227	2.35232e-34	1.71471e-32
CLCN4	50.0017	-0.979769	0.438865	-2.23251	0.0255814	0.0797015
GPR87	933.801	-0.979751	0.121315	-8.07609	6.68758e-16	1.6204e-14
PRNP	2291.58	-0.979672	0.0935069	-10.477	1.10179e-25	5.31691e-24
APH1B	84.7887	-0.97958	0.355532	-2.75525	0.00586474	0.023367
PMEPA1	295.057	-0.978898	0.19874	-4.92552	8.41342e-07	7.7894e-06
FTL	5318.64	-0.977852	0.0958494	-10.202	1.94296e-24	8.65117e-23
RNF212B	80.0813	-0.976479	0.347616	-2.80907	0.00496845	0.0202136
MAP3K13	2081.74	-0.976098	0.0962848	-10.1376	3.76175e-24	1.6621e-22
SLC15A2	117.273	-0.974171	0.287655	-3.3866	0.000707656	0.0036857
WASF2	9972.6	-0.973916	0.0887679	-10.9715	5.24029e-28	2.81153e-26
KIAA1217	2838.98	-0.973757	0.0961426	-10.1283	4.13951e-24	1.81048e-22
CAPNS2	85.3887	-0.97369	0.3395	-2.86802	0.00413055	0.0172449
NCS1	1613.67	-0.973296	0.102098	-9.53295	1.52873e-21	5.52518e-20
ARRDC4	256.673	-0.972026	0.211326	-4.59965	4.23203e-06	3.47658e-05
SERPINF1	72.8683	-0.970387	0.368173	-2.63568	0.00839689	0.0315221
SLC16A5	480.495	-0.969901	0.15471	-6.26915	3.63022e-10	5.2394e-09
FAM213A	1173.63	-0.96945	0.111622	-8.68511	3.78365e-18	1.0646e-16
CENPP	401.963	-0.969241	0.180122	-5.38104	7.4058e-08	7.99142e-07
PER2	1191.1	-0.968523	0.296843	-3.26274	0.0011034	0.00544465
CSRP2	1239.74	-0.965815	0.118456	-8.15334	3.53999e-16	8.77431e-15
KRTDAP	431.432	-0.965181	0.163128	-5.91672	3.2843e-09	4.17202e-08
LAMA5	9046.04	-0.96295	0.0853746	-11.2791	1.6642e-29	9.72901e-28
TP53TG1	105.327	-0.962811	0.30967	-3.10915	0.00187624	0.00868538
LINC00893	224.138	-0.96153	0.229487	-4.18991	2.79071e-05	0.000198732
ADAMTSL4	90.9236	-0.961508	0.326198	-2.94762	0.00320234	0.0138448
TMCC2	147.942	-0.960497	0.275555	-3.48568	0.000490882	0.00266012
POU2F3	190.154	-0.959307	0.234037	-4.09896	4.15006e-05	0.000285757
TSPAN7	66.257	-0.958369	0.381604	-2.51142	0.0120245	0.0426563
ZMYND8	903.338	-0.958064	0.133901	-7.15502	8.36621e-13	1.53597e-11
PLXDC2	989.23	-0.957351	0.12123	-7.89698	2.85753e-15	6.54732e-14
NXPE3	338.891	-0.956676	0.179879	-5.31844	1.04662e-07	1.1047e-06
PYCARD	290.88	-0.956651	0.204578	-4.67621	2.92219e-06	2.46262e-05
MEGF8	2402.6	-0.956019	0.0957331	-9.98629	1.75012e-23	7.23329e-22
USP2	76.1996	-0.955172	0.35496	-2.69093	0.00712533	0.0275077
RAB11B-AS1	70.2118	-0.954179	0.377305	-2.52894	0.0114409	0.0409388
LYSMD2	182.595	-0.954115	0.235034	-4.05948	4.91813e-05	0.000333329
CBR3	77.4372	-0.95247	0.350433	-2.71798	0.00656821	0.0257016
PORCN	368.605	-0.949825	0.190296	-4.9913	5.99734e-07	5.68038e-06
FAM86FP	49.2612	-0.948408	0.434101	-2.18476	0.0289062	0.0882459
ARAP1	1450.47	-0.947689	0.115669	-8.19313	2.54525e-16	6.3543e-15
ARL5A	1287.36	-0.945486	0.114431	-8.26248	1.42671e-16	3.63539e-15
CYP3A5	108.184	-0.944495	0.321103	-2.9414	0.00326727	0.0140637
CD82	843.587	-0.944305	0.126097	-7.48873	6.95428e-14	1.43539e-12
RGS14	479.582	-0.942144	0.153999	-6.11787	9.48315e-10	1.29716e-08
CROT	496.053	-0.941932	0.164395	-5.72969	1.00615e-08	1.20848e-07
DENND5A	1078.69	-0.941812	0.128343	-7.33824	2.16417e-13	4.21989e-12
KIF17	80.7134	-0.937674	0.350082	-2.67844	0.00739653	0.0283835
IFITM10	59.0371	-0.934872	0.400412	-2.33478	0.0195551	0.0642147
MCF2L	986.206	-0.933899	0.123885	-7.53841	4.75738e-14	1.00475e-12
C1orf226	1217.07	-0.933215	0.140965	-6.6202	3.58715e-11	5.64919e-10
BCAS4	359.934	-0.932926	0.173105	-5.38936	7.07089e-08	7.64914e-07
SIDT2	312.321	-0.932247	0.192869	-4.83358	1.34098e-06	1.20285e-05
ZNF699	116.923	-0.931893	0.31079	-2.99847	0.0027134	0.0119645
IL1R1	560.854	-0.931865	0.156737	-5.94541	2.75769e-09	3.55006e-08
DMKN	870.644	-0.931096	0.136304	-6.83103	8.43075e-12	1.42654e-10
ATF3	923.997	-0.929964	0.138264	-6.726	1.74391e-11	2.85031e-10
WFDC5	64.9132	-0.929061	0.402695	-2.30711	0.0210488	0.0682122
RSPH3	403.248	-0.928017	0.177779	-5.22006	1.78868e-07	1.82956e-06
44084	2053.47	-0.927727	0.0959214	-9.67174	3.97543e-22	1.49629e-20
PGLYRP4	97.5925	-0.926505	0.370542	-2.50041	0.0124051	0.0437725
ADAMTSL4-AS1	67.6583	-0.925983	0.393236	-2.35477	0.0185339	0.0613838
SH3D21	621.012	-0.925724	0.166491	-5.56022	2.69433e-08	3.06837e-07
CD36	86.0736	-0.925394	0.336789	-2.74769	0.0060016	0.0238243
LAMC2	8537.55	-0.92503	0.221225	-4.1814	2.89714e-05	0.000205633
SPRR1B	3029.77	-0.924596	0.103573	-8.92703	4.37592e-19	1.32629e-17
MPI	1678.16	-0.923565	0.125267	-7.3728	1.67087e-13	3.31411e-12
PERP	32322.8	-0.922036	0.0725775	-12.7042	5.60682e-37	4.63461e-35
FBXO44	382.63	-0.921053	0.172588	-5.33671	9.4646e-08	1.00498e-06
LINC01410	50.0042	-0.920171	0.432336	-2.12837	0.0333064	0.0992071
PGM1	412.841	-0.919192	0.203638	-4.51384	6.36631e-06	5.05908e-05
PSD3	2486.4	-0.918576	0.0994284	-9.23857	2.49815e-20	8.20495e-19
SYNE1	79.1098	-0.917362	0.370383	-2.47679	0.0132568	0.0463145
UGDH	1120.5	-0.915652	0.11352	-8.06601	7.26306e-16	1.75002e-14
LGALS8	2701.94	-0.91537	0.100158	-9.1393	6.2856e-20	1.99982e-18
SIRT2	1491.66	-0.913762	0.110683	-8.25565	1.51083e-16	3.83841e-15
HOXA13	96.9729	-0.913648	0.319335	-2.8611	0.00422174	0.0175959
NPBWR1	137.964	-0.911462	0.267389	-3.40875	0.000652611	0.00343003
BLVRB	1511.29	-0.910995	0.105439	-8.64002	5.62018e-18	1.56351e-16
DEGS1	1355.89	-0.910267	0.116366	-7.82247	5.17962e-15	1.16514e-13
ACOT11	855.924	-0.910134	0.129955	-7.00345	2.49728e-12	4.44773e-11
NGFRAP1	953.777	-0.909777	0.12946	-7.02747	2.10311e-12	3.76511e-11
WBP5	196.809	-0.906705	0.229312	-3.95402	7.68499e-05	0.00050252
TRIM2	3844.13	-0.905189	0.239273	-3.78308	0.0001549	0.000943267
S100A8	2760.04	-0.90513	0.354317	-2.55457	0.0106318	0.0384658
SH3RF3	270.113	-0.904402	0.195284	-4.63121	3.63542e-06	3.0224e-05
PFKFB3	1391.94	-0.904125	0.120927	-7.47664	7.62487e-14	1.56818e-12
LOC101929595	56.7595	-0.903792	0.405279	-2.23005	0.0257444	0.0801225
CDH3	2130.35	-0.903297	0.0953364	-9.47483	2.67183e-21	9.45872e-20
IFT140	629.652	-0.902932	0.146991	-6.14275	8.11025e-10	1.1236e-08
PCDH12	59.8441	-0.902583	0.414255	-2.17881	0.0293456	0.0893189
TSPAN18	2122	-0.90252	0.104024	-8.67611	4.0953e-18	1.14854e-16
IPMK	1219.44	-0.90189	0.124533	-7.24219	4.41508e-13	8.34518e-12
SDCBP2	68.7706	-0.901654	0.37034	-2.43466	0.0149056	0.0511642
MAPRE3	812.3	-0.901203	0.126672	-7.11446	1.12353e-12	2.0518e-11
ZNF774	54.5473	-0.898351	0.419436	-2.1418	0.0322092	0.0964881
STOX2	409.256	-0.896407	0.168838	-5.30927	1.10062e-07	1.1573e-06
DNAH17	245.985	-0.895855	0.203984	-4.39179	1.12424e-05	8.60103e-05
ST6GALNAC2	1325.25	-0.895263	0.118718	-7.54107	4.66146e-14	9.85696e-13
FGFR3	683.169	-0.89407	0.165108	-5.41505	6.12731e-08	6.7082e-07
SYT17	172.912	-0.894015	0.238342	-3.75097	0.000176154	0.00105889
FZD8	655.366	-0.892175	0.136603	-6.53118	6.52556e-11	1.00209e-09
ARID3A	493.086	-0.890877	0.164572	-5.41331	6.18704e-08	6.76074e-07
ANKDD1A	78.9742	-0.890284	0.34539	-2.57762	0.00994826	0.0364664
DAB2IP	2605.48	-0.890013	0.091242	-9.75442	1.76602e-22	6.79749e-21
TSPAN9	374.132	-0.888407	0.172112	-5.16178	2.44607e-07	2.45118e-06
PLK3	462.829	-0.886848	0.158047	-5.61128	2.00831e-08	2.32389e-07
CCL26	136.417	-0.886104	0.266032	-3.33082	0.000865901	0.00439205
LDLRAD4	284.043	-0.884436	0.22401	-3.9482	7.87405e-05	0.000513746
HEY2	98.8308	-0.884325	0.315833	-2.79997	0.00511072	0.0207163
C4orf3	1490.31	-0.88431	0.137971	-6.40936	1.46128e-10	2.19331e-09
MVP	277.802	-0.882735	0.19511	-4.5243	6.05964e-06	4.83987e-05
SCPEP1	1516.28	-0.881601	0.114238	-7.71724	1.18879e-14	2.61624e-13
ALOX12B	280.9	-0.881156	0.193782	-4.54715	5.4376e-06	4.39383e-05
RDH10	1484.04	-0.879926	0.120808	-7.28367	3.24853e-13	6.21502e-12
SNX31	156.484	-0.878369	0.262194	-3.35007	0.000807917	0.00413435
NEK6	486.286	-0.878199	0.163539	-5.36997	7.87491e-08	8.4659e-07
NHS	1307.28	-0.876219	0.114905	-7.62563	2.42855e-14	5.2379e-13
DACT2	110.24	-0.875164	0.310508	-2.81849	0.00482495	0.0196966
EGLN1	2372.59	-0.873529	0.126043	-6.93038	4.19719e-12	7.34658e-11
C1R	244.508	-0.872964	0.236976	-3.68377	0.000229812	0.0013463
PAM	2059.54	-0.872457	0.253694	-3.43902	0.000583827	0.00311495
MYPOP	284.309	-0.872324	0.195015	-4.4731	7.70936e-06	6.04297e-05
PKM	31906.2	-0.871269	0.201299	-4.32824	1.50306e-05	0.00011183
KCNQ5	104.603	-0.87085	0.304601	-2.85899	0.00424996	0.0176879
KRT17	13580.6	-0.868928	0.22076	-3.93607	8.28257e-05	0.000537931
ADK	809.892	-0.868758	0.129922	-6.68678	2.28131e-11	3.66964e-10
IL31RA	74.0725	-0.86705	0.365469	-2.37243	0.0176715	0.0590279
RFX7	1591.98	-0.866686	0.111287	-7.78782	6.81747e-15	1.52366e-13
RIMKLA	1582.2	-0.865423	0.137468	-6.29545	3.06511e-10	4.46859e-09
STPG1	884.388	-0.865291	0.121904	-7.09812	1.26468e-12	2.30228e-11
EFEMP2	63.5238	-0.864053	0.386122	-2.23777	0.0252358	0.0788522
KCNH1	182.335	-0.863932	0.24803	-3.48318	0.000495496	0.00268344
EBPL	457.212	-0.862488	0.15675	-5.50232	3.74827e-08	4.20761e-07
BICD2	6093.3	-0.862409	0.0825374	-10.4487	1.48548e-25	7.10375e-24
AMOTL1	1073.03	-0.86168	0.114464	-7.52794	5.15461e-14	1.08335e-12
IRF6	7421.29	-0.861323	0.082747	-10.4091	2.25327e-25	1.06651e-23
BPNT1	1411.16	-0.861204	0.107458	-8.01434	1.10728e-15	2.64584e-14
RUNDC3B	157.971	-0.859816	0.250456	-3.433	0.000596939	0.00317706
KSR2	498.155	-0.859471	0.153623	-5.59468	2.21026e-08	2.54393e-07
WDR66	934.59	-0.858932	0.121828	-7.05036	1.7845e-12	3.2147e-11
SLC38A6	205.682	-0.858805	0.220753	-3.89034	0.000100105	0.000638159
CERS4	720.073	-0.858053	0.139059	-6.17041	6.8114e-10	9.55144e-09
PTPRS	5266.99	-0.857813	0.08314	-10.3177	5.86132e-25	2.69309e-23
CPE	299.228	-0.857423	0.191519	-4.47696	7.57152e-06	5.94301e-05
AATK	117.728	-0.857333	0.303233	-2.82731	0.00469412	0.0192626
MGC57346	118.6	-0.857217	0.287136	-2.98541	0.002832	0.0123988
FAM160A1	666.761	-0.856625	0.149627	-5.72507	1.03392e-08	1.2387e-07
GALNT18	461.699	-0.856047	0.158098	-5.41467	6.1402e-08	6.71806e-07
DSP	17851.7	-0.85595	0.074418	-11.5019	1.29019e-30	8.04668e-29
IGF1R	2760.48	-0.854864	0.0897939	-9.52029	1.72698e-21	6.20277e-20
BAIAP2	1942.57	-0.851788	0.0973603	-8.74882	2.1559e-18	6.22832e-17
DLL3	67.6201	-0.85088	0.379256	-2.24355	0.0248614	0.0779218
PRICKLE3	981.409	-0.850854	0.124371	-6.84128	7.84893e-12	1.3307e-10
CEP126	78.9765	-0.850784	0.34426	-2.47134	0.0134606	0.0469126
DUSP5	527.032	-0.850279	0.178465	-4.76441	1.89403e-06	1.64843e-05
ATF7IP2	102.036	-0.848738	0.324931	-2.61206	0.00899991	0.0334731
PEX13	1147.11	-0.84752	0.11455	-7.39873	1.37497e-13	2.75248e-12
CDH26	74.0376	-0.845595	0.358621	-2.35791	0.0183782	0.0609994
PIAS3	1933.76	-0.844489	0.103732	-8.14103	3.91936e-16	9.68683e-15
SCAMP1-AS1	120.241	-0.843989	0.282846	-2.98392	0.00284582	0.0124525
GNG12	4956.92	-0.843471	0.0903837	-9.33211	1.03784e-20	3.50874e-19
RGS12	821.055	-0.843356	0.132169	-6.3809	1.76047e-10	2.62641e-09
MSANTD3	499.683	-0.842178	0.156668	-5.37557	7.6342e-08	8.21734e-07
PER1	409.656	-0.841737	0.169981	-4.95196	7.34707e-07	6.86097e-06
HAUS6	2932.38	-0.841641	0.089698	-9.38306	6.4086e-21	2.19673e-19
SYT8	155.123	-0.84155	0.252024	-3.33917	0.000840303	0.00427728
SERPINB5	5932.18	-0.840204	0.0829372	-10.1306	4.0415e-24	1.77661e-22
PGM2	1979.71	-0.838345	0.10522	-7.96753	1.61879e-15	3.78947e-14
SFXN3	136.034	-0.837743	0.270659	-3.0952	0.00196678	0.00904396
PLCXD2	81.9741	-0.837649	0.338531	-2.47436	0.0133474	0.0465902
ABHD4	439.556	-0.837184	0.166768	-5.02006	5.16542e-07	4.92482e-06
MALAT1	180331	-0.83612	0.0971951	-8.60249	7.80061e-18	2.13233e-16
GPC1	6367.21	-0.835548	0.0825377	-10.1232	4.35797e-24	1.90122e-22
ANKRD19P	63.1564	-0.834722	0.386291	-2.16086	0.0307058	0.0927402
HADHB	2145.49	-0.833826	0.0984429	-8.47015	2.45078e-17	6.52383e-16
SLC35D3	161.286	-0.833092	0.251506	-3.31241	0.00092495	0.00464812
ZHX3	903.685	-0.832907	0.121417	-6.85986	6.89259e-12	1.17781e-10
MAOA	132.287	-0.83138	0.276731	-3.00428	0.00266206	0.0117802
C1QTNF6	96.5907	-0.830961	0.31713	-2.62026	0.00878635	0.0328138
LOC284454	386.576	-0.83073	0.169287	-4.90722	9.23761e-07	8.4933e-06
ENO1	58208.9	-0.830643	0.267895	-3.10063	0.00193109	0.00889638
LHPP	170.098	-0.829978	0.242161	-3.42739	0.000609416	0.0032335
KIF26A	469.212	-0.828329	0.168963	-4.90244	9.46517e-07	8.68864e-06
LOC100128361	234.971	-0.827604	0.216732	-3.81855	0.000134238	0.000831813
MICALL1	2563.44	-0.826913	0.0925781	-8.93206	4.18152e-19	1.27407e-17
ATHL1	305.62	-0.826022	0.188091	-4.39161	1.12516e-05	8.60103e-05
SSH3	954.861	-0.825775	0.121799	-6.77979	1.20352e-11	2.00501e-10
ATAD3C	63.7416	-0.825106	0.382551	-2.15685	0.0310172	0.0935987
ATP10D	594.72	-0.823189	0.141663	-5.81091	6.21326e-09	7.60809e-08
SHC2	105.838	-0.823151	0.302776	-2.71868	0.00655428	0.0256529
IFITM3	209.824	-0.823076	0.21832	-3.77005	0.000163217	0.000988686
SCAMP1	1911.28	-0.821778	0.0974545	-8.43242	3.38581e-17	8.95762e-16
SMPDL3A	145.238	-0.821526	0.26434	-3.10784	0.00188461	0.00871341
MFN2	5161.35	-0.819062	0.0800267	-10.2349	1.38406e-24	6.25945e-23
C7orf60	496.476	-0.817965	0.154436	-5.29647	1.1806e-07	1.23463e-06
SORL1	11662.1	-0.817224	0.109878	-7.43758	1.02544e-13	2.08419e-12
DUSP1	753.657	-0.81712	0.131431	-6.21712	5.06357e-10	7.17622e-09
LINC00886	249.493	-0.816149	0.206892	-3.94481	7.98636e-05	0.000520454
RAB27B	648.003	-0.815641	0.137305	-5.94034	2.84437e-09	3.65892e-08
NABP1	970.6	-0.814588	0.12132	-6.71439	1.88848e-11	3.07787e-10
IRS2	992.925	-0.813942	0.120412	-6.75967	1.38309e-11	2.29311e-10
ABHD14A	71.3237	-0.81392	0.37594	-2.16502	0.0303858	0.091838
S1PR5	236.015	-0.812952	0.208071	-3.90709	9.34153e-05	0.000601058
MYO5A	1157	-0.812716	0.113349	-7.17005	7.49691e-13	1.38372e-11
PCAT6	107.28	-0.812415	0.325884	-2.49296	0.0126684	0.0444927
PALM	1053.03	-0.811427	0.122004	-6.6508	2.91507e-11	4.65871e-10
TRIM29	8210.48	-0.810778	0.0794346	-10.2069	1.84757e-24	8.26906e-23
DBP	903.853	-0.810752	0.144858	-5.59686	2.18269e-08	2.51388e-07
MMP24	428.678	-0.809992	0.17129	-4.72877	2.25888e-06	1.94248e-05
TMC7	171.018	-0.809493	0.242171	-3.34265	0.000829835	0.00423147
TTBK2	736.909	-0.809013	0.132564	-6.10283	1.04209e-09	1.41757e-08
IL11RA	139.416	-0.808906	0.265656	-3.04494	0.0023273	0.0104895
ABCA12	1748.59	-0.80798	0.310292	-2.60394	0.00921599	0.0341517
LOC400706	130.73	-0.807725	0.279049	-2.89457	0.00379684	0.0160299
NQO1	2186.01	-0.807394	0.0953666	-8.46621	2.53501e-17	6.73768e-16
MANBA	575.808	-0.806496	0.150468	-5.35993	8.32534e-08	8.92462e-07
RARG	2788.49	-0.80628	0.0913413	-8.82711	1.07413e-18	3.16667e-17
LINC00657	11176.9	-0.805529	0.0856132	-9.40893	5.01192e-21	1.72482e-19
CPAMD8	92.9532	-0.804134	0.36694	-2.19146	0.0284187	0.0870771
LOC100129034	673.903	-0.803316	0.15095	-5.32173	1.02786e-07	1.08674e-06
MAP2K6	200.57	-0.802869	0.222811	-3.60336	0.000314136	0.00178344
CMTM3	140.868	-0.802823	0.278795	-2.87962	0.00398152	0.016691
LIPA	924.087	-0.802247	0.120063	-6.68188	2.35892e-11	3.78743e-10
DYNC2LI1	279.793	-0.801324	0.198504	-4.03682	5.41812e-05	0.000364926
ZNF546	77.1517	-0.800797	0.350607	-2.28403	0.0223697	0.0716726
LYPD3	9403.72	-0.799009	0.0771033	-10.3628	3.65927e-25	1.69939e-23
KCNC4	331.569	-0.798947	0.18444	-4.33176	1.47925e-05	0.000110106
SEMA3B	149.356	-0.798625	0.256697	-3.11116	0.00186355	0.00864521
RAB29	954.175	-0.798507	0.119261	-6.69544	2.1502e-11	3.47167e-10
TUBB6	3442.32	-0.798384	0.0852085	-9.36976	7.26967e-21	2.48203e-19
LRRC16B	71.7557	-0.798353	0.364549	-2.18997	0.0285261	0.0873325
ATP7A	1160.25	-0.797596	0.120879	-6.59831	4.15869e-11	6.51466e-10
RPGRIP1L	171.639	-0.796841	0.240224	-3.31708	0.000909648	0.00458032
PRELID2	1280.29	-0.796347	0.134644	-5.91446	3.32959e-09	4.22646e-08
RAPH1	2091.21	-0.794675	0.113383	-7.00878	2.40401e-12	4.28604e-11
SLC4A7	1333.83	-0.793325	0.113561	-6.98588	2.83077e-12	5.01584e-11
RALB	1938	-0.792131	0.0976486	-8.11206	4.97706e-16	1.21963e-14
SBSN	781.986	-0.791933	0.130595	-6.06406	1.32731e-09	1.77895e-08
TTC30A	365.247	-0.790397	0.174476	-4.53012	5.89496e-06	4.72363e-05
TNFAIP1	2080.89	-0.790032	0.0992725	-7.95822	1.74526e-15	4.06896e-14
PIR	540.232	-0.789404	0.150504	-5.24509	1.56206e-07	1.60727e-06
WDR19	348.543	-0.788837	0.177048	-4.45549	8.37018e-06	6.52542e-05
SSBP3	1169.54	-0.788338	0.119476	-6.59829	4.15933e-11	6.51466e-10
CITED4	1248.06	-0.788296	0.121367	-6.49516	8.29475e-11	1.2659e-09
CPM	314.581	-0.78742	0.215236	-3.65841	0.000253783	0.0014688
FGFBP1	811.924	-0.786955	0.12989	-6.05863	1.37288e-09	1.83008e-08
WDR54	593.734	-0.786528	0.152716	-5.15025	2.60134e-07	2.59629e-06
TMEM263	773.058	-0.785408	0.130388	-6.02363	1.70549e-09	2.25088e-08
PLK2	1390.24	-0.784402	0.107847	-7.27332	3.50766e-13	6.68118e-12
FAM57A	764.459	-0.783517	0.132237	-5.92511	3.12091e-09	3.9791e-08
HOXD11	87.4461	-0.783473	0.330515	-2.37046	0.017766	0.0593093
ATF6B	226.12	-0.782366	0.228005	-3.43136	0.000600564	0.00319438
ZNF292	3604.26	-0.782186	0.237905	-3.28781	0.00100971	0.00503752
GSTM3	692.723	-0.782107	0.138405	-5.65085	1.59659e-08	1.8637e-07
P4HA2-AS1	109.065	-0.781575	0.300855	-2.59785	0.00938096	0.034711
FOSL2	7300.01	-0.780813	0.106606	-7.3243	2.40156e-13	4.66173e-12
NUAK1	557.673	-0.780525	0.161017	-4.84745	1.25056e-06	1.1276e-05
DUOX1	1938.8	-0.779879	0.10599	-7.35801	1.86675e-13	3.67731e-12
FAM69A	579.874	-0.779677	0.147083	-5.30093	1.15217e-07	1.20709e-06
PLD3	2421.26	-0.779377	0.0980115	-7.9519	1.83674e-15	4.27072e-14
TMOD2	758.369	-0.779212	0.134038	-5.81338	6.12245e-09	7.51218e-08
ZNF697	747.953	-0.778132	0.143541	-5.42097	5.92773e-08	6.51033e-07
AMPD3	274.53	-0.777412	0.207587	-3.74499	0.000180398	0.00108214
FRRS1	875.922	-0.775068	0.127504	-6.07879	1.21093e-09	1.63183e-08
ABLIM1	5655.09	-0.774607	0.0959249	-8.07514	6.73986e-16	1.63078e-14
HOXC13-AS	113.379	-0.774256	0.315241	-2.45608	0.0140462	0.0486491
GSTK1	834.102	-0.773644	0.128536	-6.01889	1.75618e-09	2.31249e-08
DDX3Y	926.301	-0.772508	0.130155	-5.9353	2.93311e-09	3.75908e-08
ADSSL1	217.694	-0.772445	0.218324	-3.53806	0.000403073	0.00223547
CES4A	392.405	-0.771435	0.166596	-4.63057	3.64668e-06	3.03031e-05
TMEM74B	96.5041	-0.770064	0.328775	-2.34222	0.0191694	0.063169
SMTN	714.08	-0.769453	0.134782	-5.70886	1.13736e-08	1.35324e-07
RNF141	1688.29	-0.769215	0.106417	-7.2283	4.89083e-13	9.21418e-12
EML6	215.249	-0.76875	0.219263	-3.50607	0.000454776	0.00249024
HOXD10	78.2262	-0.767377	0.351836	-2.18107	0.0291783	0.0888865
SERPINB8	997.687	-0.76725	0.147351	-5.20696	1.91963e-07	1.95309e-06
NDRG3	1418.83	-0.766542	0.107509	-7.13003	1.0035e-12	1.83843e-11
ZNF561	352.293	-0.766297	0.173651	-4.41287	1.02011e-05	7.86055e-05
LOC100131564	263.119	-0.764903	0.211952	-3.60884	0.000307565	0.00174901
TMEM53	135.031	-0.763426	0.269442	-2.83336	0.00460614	0.0189511
SLC25A20	147.15	-0.762363	0.256372	-2.97366	0.0029427	0.0128185
TMEM161B-AS1	153.986	-0.76182	0.252508	-3.01702	0.00255273	0.011378
ZMYM6NB	174.976	-0.761747	0.247223	-3.08122	0.00206154	0.00941951
TNFAIP8	638.96	-0.761746	0.136757	-5.57007	2.54642e-08	2.9076e-07
MDGA1	252.6	-0.761726	0.204253	-3.72932	0.000191998	0.00114576
REEP4	2782.09	-0.760295	0.0973062	-7.81343	5.56525e-15	1.25026e-13
FLG	212.942	-0.759394	0.232068	-3.27229	0.00106681	0.00529237
FAM127C	296.47	-0.758421	0.187961	-4.03499	5.46035e-05	0.000367627
NUMBL	560.253	-0.758308	0.14638	-5.18041	2.21396e-07	2.23022e-06
AUH	350.059	-0.758241	0.176445	-4.29732	1.72877e-05	0.000127525
DOC2A	212.811	-0.757652	0.224822	-3.37001	0.000751652	0.00388672
METTL21B	108.726	-0.757545	0.314013	-2.41246	0.0158452	0.053833
SMARCD3	109.546	-0.7573	0.310655	-2.43775	0.0147789	0.0508156
ZFYVE28	95.3698	-0.756986	0.338333	-2.2374	0.0252602	0.0789
TRIT1	923.142	-0.756797	0.124604	-6.07359	1.25082e-09	1.68164e-08
XDH	185.07	-0.756533	0.236662	-3.19668	0.00139018	0.00667131
NRG1	391.396	-0.754754	0.203959	-3.70052	0.000215155	0.00127121
DGAT2	276.322	-0.754662	0.195952	-3.85126	0.000117514	0.000737169
RHOB	1088.36	-0.753877	0.118555	-6.35888	2.03227e-10	3.01628e-09
DNM3	102.964	-0.753833	0.304583	-2.47497	0.0133247	0.0465235
TLR5	467.642	-0.7534	0.168856	-4.4618	8.12757e-06	6.34773e-05
MGC16275	84.9616	-0.752859	0.332245	-2.26598	0.0234528	0.0743978
PNRC1	2518.85	-0.750208	0.107281	-6.99294	2.69193e-12	4.78454e-11
C3orf52	416.189	-0.75013	0.174381	-4.30167	1.69513e-05	0.00012531
DENND4C	3617.13	-0.749957	0.0978314	-7.66581	1.777e-14	3.85672e-13
UBE2L6	130.04	-0.74981	0.276726	-2.70958	0.00673694	0.0262414
NAMPT	1282.06	-0.749549	0.110975	-6.75422	1.43608e-11	2.37641e-10
TMEM69	866.179	-0.74923	0.128079	-5.84975	4.92311e-09	6.11882e-08
ECI2	316.853	-0.748152	0.19253	-3.88589	0.000101955	0.000648651
DNAH1	221.054	-0.747932	0.213612	-3.50135	0.000462904	0.00252754
CYP4F12	135.96	-0.746783	0.274216	-2.72334	0.00646251	0.0253626
GAST	102.762	-0.746758	0.31884	-2.34211	0.0191749	0.0631704
PJA1	493.28	-0.745315	0.157458	-4.73341	2.20774e-06	1.90229e-05
ACAP1	255.298	-0.742792	0.20554	-3.61386	0.000301676	0.00172005
ZFHX2	179.277	-0.741464	0.241584	-3.06918	0.00214646	0.00976104
HSF4	240.795	-0.740816	0.204534	-3.62196	0.000292376	0.00167255
NOS1AP	439.748	-0.739218	0.2056	-3.59541	0.000323881	0.00183455
SAV1	961.49	-0.73905	0.128578	-5.74786	9.03805e-09	1.08961e-07
RNF217	1160.59	-0.73889	0.13372	-5.52564	3.28278e-08	3.70434e-07
PDZD2	572.253	-0.738741	0.170019	-4.34504	1.39249e-05	0.000104231
SLC9A3R1	4808.17	-0.737716	0.0816087	-9.03968	1.57128e-19	4.89108e-18
PALLD	4308.84	-0.737045	0.0825214	-8.93156	4.20033e-19	1.27755e-17
ATP9A	2737.93	-0.737034	0.100541	-7.33067	2.28997e-13	4.45512e-12
CYR61	609.782	-0.735757	0.14004	-5.25392	1.48892e-07	1.53843e-06
ACAP3	1707.71	-0.735678	0.101097	-7.27694	3.4148e-13	6.5115e-12
ARHGEF19	1264.66	-0.73543	0.12629	-5.82332	5.76892e-09	7.10362e-08
ETNK2	564.809	-0.735368	0.143441	-5.12664	2.9496e-07	2.91351e-06
FAXC	346.048	-0.735014	0.184322	-3.98767	6.67261e-05	0.000441332
STOM	1788.98	-0.734874	0.100088	-7.34226	2.10021e-13	4.10909e-12
GOLGA8A	802.5	-0.734709	0.144668	-5.0786	3.80227e-07	3.67452e-06
VWA1	1169.74	-0.734531	0.118783	-6.18382	6.2569e-10	8.80246e-09
PLP2	2961.95	-0.732671	0.0978209	-7.48992	6.89153e-14	1.42414e-12
PIK3IP1	319.568	-0.732588	0.212543	-3.44678	0.000567314	0.00303905
SYNGR1	653.369	-0.732507	0.137733	-5.3183	1.0474e-07	1.1047e-06
IGFBP4	294.354	-0.730741	0.189431	-3.85756	0.000114522	0.000719974
TANC2	1564.87	-0.730279	0.136087	-5.36628	8.03793e-08	8.63041e-07
ZNF750	1093.1	-0.730172	0.124464	-5.86654	4.44973e-09	5.56651e-08
PJA2	3724.07	-0.730138	0.0888079	-8.22154	2.00911e-16	5.06705e-15
TTC33	466.202	-0.72996	0.161492	-4.52009	6.18136e-06	4.93024e-05
PPM1M	295.05	-0.72946	0.192579	-3.78785	0.000151954	0.000927944
TSC22D1	3249.89	-0.729081	0.0919629	-7.92799	2.22719e-15	5.15087e-14
EPAS1	2009.6	-0.72895	0.102313	-7.12471	1.04299e-12	1.90876e-11
GJB3	3099.23	-0.728821	0.101535	-7.17804	7.07203e-13	1.3081e-11
NPL	504.567	-0.727693	0.151552	-4.80162	1.57384e-06	1.38511e-05
KIAA1407	162.474	-0.727394	0.249585	-2.91441	0.00356357	0.0151521
CTSK	104.151	-0.726535	0.30456	-2.38552	0.0170551	0.0572345
ID1	5042.88	-0.726197	0.102553	-7.0812	1.42908e-12	2.59336e-11
VWA8	1170.87	-0.724961	0.112332	-6.45372	1.09135e-10	1.64818e-09
STKLD1	104.516	-0.724579	0.306922	-2.36079	0.0182361	0.0605743
KDM4B	1981.89	-0.724445	0.108949	-6.64937	2.94359e-11	4.69996e-10
CTIF	476.389	-0.72345	0.158007	-4.57859	4.68116e-06	3.82011e-05
RIOK3	2701.28	-0.723383	0.0942832	-7.67245	1.68744e-14	3.66694e-13
PPP4R1L	152.348	-0.722858	0.261932	-2.75971	0.00578521	0.0231086
ELK4	5854.3	-0.722592	0.0955554	-7.56202	3.96849e-14	8.42257e-13
EPHX2	501.124	-0.722566	0.155543	-4.64543	3.39367e-06	2.83506e-05
MICALL2	672.046	-0.72247	0.134929	-5.35445	8.58184e-08	9.1745e-07
STK39	465.425	-0.72232	0.154854	-4.66453	3.09329e-06	2.59668e-05
ANKRD34A	89.7764	-0.721872	0.330792	-2.18225	0.029091	0.0886848
CEBPD	2031.86	-0.721773	0.107785	-6.6964	2.13624e-11	3.45558e-10
CELSR1	2488.28	-0.720546	0.0961894	-7.49091	6.83985e-14	1.41515e-12
DNAJC18	235.089	-0.720465	0.211677	-3.40361	0.000665013	0.00348885
HERC3	712.231	-0.720458	0.175171	-4.11287	3.90764e-05	0.000270467
CCNL1	6775.66	-0.720075	0.100266	-7.18167	6.88626e-13	1.27647e-11
GSTM4	178.306	-0.719535	0.235633	-3.05363	0.00226093	0.0102278
ORAI3	632.838	-0.71936	0.147204	-4.88682	1.02476e-06	9.34733e-06
TUBA4A	3715.9	-0.719296	0.0966761	-7.44026	1.00484e-13	2.04471e-12
LRRK1	445.508	-0.719225	0.159491	-4.5095	6.49798e-06	5.14242e-05
FAM172A	869.791	-0.71891	0.123695	-5.81193	6.17551e-09	7.5719e-08
CIC	3884.79	-0.717971	0.0847531	-8.47132	2.42628e-17	6.46858e-16
VMP1	4115.06	-0.717091	0.0920555	-7.78977	6.71324e-15	1.50231e-13
LOC100506258	104.763	-0.715672	0.317216	-2.2561	0.0240643	0.0758364
PAQR8	95.8969	-0.7154	0.312758	-2.28739	0.022173	0.0711691
TENM4	1307.95	-0.715128	0.116462	-6.14046	8.22852e-10	1.13816e-08
BBS1	246.188	-0.713105	0.20324	-3.50868	0.000450338	0.00246991
ZBED6	2486.15	-0.712786	0.112956	-6.31031	2.78482e-10	4.07717e-09
SLC36A1	1132.63	-0.709675	0.115085	-6.16651	6.98146e-10	9.78197e-09
GABARAPL1	886.748	-0.709665	0.124708	-5.69061	1.26587e-08	1.49481e-07
KCNK6	524.32	-0.70802	0.150116	-4.7165	2.39939e-06	2.05513e-05
CYB5R1	912.511	-0.705364	0.120463	-5.85543	4.75784e-09	5.93048e-08
EVPLL	155.826	-0.70516	0.249203	-2.82966	0.0046597	0.0191486
DHRS1	362.169	-0.704931	0.178087	-3.95834	7.54722e-05	0.000493885
LYRM5	148.556	-0.703985	0.255183	-2.75875	0.00580234	0.0231611
TRPV4	1047.92	-0.703922	0.125463	-5.61059	2.01638e-08	2.33166e-07
PPARA	928.957	-0.703232	0.137813	-5.10279	3.34685e-07	3.26852e-06
PLEKHG5	1420.59	-0.702753	0.112744	-6.23316	4.57119e-10	6.52121e-09
ZNF488	288.219	-0.702619	0.191176	-3.67524	0.000237628	0.00138691
CDK6	1156.02	-0.701721	0.306362	-2.29049	0.0219927	0.0707403
GPR137B	795.472	-0.701541	0.14674	-4.78083	1.7457e-06	1.52548e-05
LINC01004	876.806	-0.700262	0.145082	-4.82666	1.38845e-06	1.23963e-05
LUZP1	2578.73	-0.69893	0.0957504	-7.2995	2.88842e-13	5.57545e-12
SMIM10L2A	267.102	-0.698766	0.19605	-3.56422	0.000364941	0.00204102
PPAP2A	880.337	-0.698099	0.12606	-5.53785	3.06207e-08	3.46887e-07
TNFRSF1A	2076.7	-0.697319	0.0947563	-7.35907	1.85194e-13	3.6523e-12
TKT	7304.79	-0.696805	0.0884483	-7.87811	3.32375e-15	7.55541e-14
KRAS	3248.6	-0.696621	0.0991906	-7.02305	2.17072e-12	3.87812e-11
GCLM	2093.56	-0.696448	0.0974106	-7.14961	8.70235e-13	1.59599e-11
UQCRC1	3454.83	-0.696097	0.0946529	-7.35421	1.92062e-13	3.76625e-12
KLC3	889.97	-0.695899	0.121891	-5.70921	1.13502e-08	1.35139e-07
TM4SF1	1483.21	-0.695416	0.104064	-6.68256	2.348e-11	3.7734e-10
PLOD1	3933.74	-0.69367	0.0870114	-7.97217	1.55908e-15	3.6596e-14
TACC2	1673.48	-0.693083	0.137427	-5.0433	4.5757e-07	4.38922e-06
IER5L	953.23	-0.692704	0.12865	-5.3844	7.2688e-08	7.85339e-07
LRRC75A-AS1	3945.06	-0.691887	0.0919463	-7.5249	5.27587e-14	1.10614e-12
ATP8B2	269.976	-0.690638	0.197721	-3.49299	0.000477643	0.00259734
TCEAL8	130.381	-0.690422	0.292952	-2.35678	0.0184343	0.061115
METTL8	261.501	-0.689192	0.201839	-3.41456	0.000638863	0.00336905
GTF2H5	368.853	-0.688051	0.174743	-3.93751	8.23321e-05	0.000535128
TMC6	1917.2	-0.687765	0.0966088	-7.11908	1.08653e-12	1.98635e-11
TTC39A	204.94	-0.687671	0.224277	-3.06617	0.00216818	0.00984945
ENG	153.312	-0.686782	0.250893	-2.73735	0.00619355	0.0244907
FTO	689.031	-0.686752	0.136512	-5.03069	4.8871e-07	4.66978e-06
ACADS	437.415	-0.686444	0.164363	-4.1764	2.96162e-05	0.000209607
BLMH	1032.34	-0.684463	0.118644	-5.76904	7.97257e-09	9.66555e-08
PAQR7	460.396	-0.683192	0.156321	-4.37045	1.23989e-05	9.37019e-05
CTAGE5	783.994	-0.683073	0.130968	-5.21558	1.83242e-07	1.86877e-06
GRAMD1A	743.27	-0.683055	0.137222	-4.97773	6.43335e-07	6.06342e-06
PPP1R14C	235.807	-0.682869	0.216331	-3.1566	0.00159622	0.00753244
TNNT1	454.79	-0.682419	0.159294	-4.28402	1.8355e-05	0.000134536
CTBS	469.978	-0.681788	0.164266	-4.15052	3.31726e-05	0.000232396
ECH1	2224.15	-0.680596	0.0966386	-7.04269	1.88557e-12	3.39324e-11
CHST12	262.974	-0.679963	0.200679	-3.38832	0.000703229	0.00366845
TGFBR3	683.134	-0.679598	0.141401	-4.80617	1.53849e-06	1.35607e-05
CHURC1	687.774	-0.679445	0.138315	-4.91232	9.00062e-07	8.28421e-06
LPP	7953.2	-0.677733	0.102536	-6.60971	3.85081e-11	6.05338e-10
MASP2	143.012	-0.677367	0.261176	-2.59352	0.00949984	0.0350792
MYOF	3694.66	-0.676261	0.0856924	-7.89173	2.98026e-15	6.80145e-14
CD47	1715.02	-0.675715	0.122866	-5.49963	3.80596e-08	4.26959e-07
CARD14	376.036	-0.675033	0.182769	-3.69336	0.000221313	0.00130048
KLK7	239.723	-0.674819	0.211913	-3.18442	0.00145046	0.00693556
TARSL2	249.18	-0.674742	0.204341	-3.30204	0.000959849	0.00481346
UBA6-AS1	146.465	-0.674401	0.260652	-2.58737	0.00967131	0.0356091
RAB30	375.973	-0.673938	0.16943	-3.97768	6.95917e-05	0.000458355
WDR60	197.712	-0.67311	0.226842	-2.96731	0.00300416	0.0130566
JOSD2	241.884	-0.672873	0.223995	-3.00397	0.00266483	0.0117894
TUFT1	4479.03	-0.672316	0.0814572	-8.25361	1.53676e-16	3.89854e-15
HADHA	4276	-0.672227	0.0828361	-8.11514	4.85207e-16	1.19069e-14
IL11	110.958	-0.671487	0.308731	-2.17499	0.0296308	0.0900629
IKBIP	309.91	-0.670955	0.184338	-3.63981	0.000272836	0.0015696
RNF215	157.076	-0.670732	0.263891	-2.5417	0.0110313	0.0396623
MIB2	1127.81	-0.668568	0.112933	-5.92004	3.21857e-09	4.09367e-08
KDM5B	12141.4	-0.668364	0.0868748	-7.69342	1.43257e-14	3.13676e-13
COPZ2	228.362	-0.667723	0.21077	-3.16802	0.0015348	0.00729242
DUOXA2	149.224	-0.667095	0.25836	-2.58204	0.00982183	0.0360565
CGREF1	265.679	-0.666716	0.196521	-3.39259	0.000692342	0.00361794
ALDH5A1	612.749	-0.666674	0.139977	-4.76272	1.90997e-06	1.65979e-05
KIZ	417.633	-0.666553	0.168825	-3.94819	7.8745e-05	0.000513746
MSRB1	483.638	-0.666344	0.1561	-4.2687	1.96614e-05	0.000143503
POLR1D	1164.46	-0.666311	0.114926	-5.79772	6.72227e-09	8.21896e-08
IFT57	217.658	-0.666261	0.214936	-3.09981	0.00193647	0.00891642
SSR1	3552.94	-0.66596	0.0850029	-7.83456	4.70503e-15	1.06115e-13
TXN	6913.46	-0.664838	0.0833728	-7.97427	1.53279e-15	3.60278e-14
AP3B2	634.637	-0.664819	0.137796	-4.82466	1.40244e-06	1.25147e-05
SEMA3F	881.757	-0.664782	0.134278	-4.95079	7.39135e-07	6.8986e-06
NRSN2-AS1	191.478	-0.664379	0.229607	-2.89355	0.00380915	0.0160779
PABPC3	198.084	-0.664185	0.226872	-2.92757	0.00341617	0.0146219
KLHL5	1924.59	-0.664054	0.12064	-5.50441	3.70406e-08	4.1629e-07
NFIX	1681.61	-0.664053	0.102502	-6.47841	9.26926e-11	1.40717e-09
SRXN1	1529.48	-0.663562	0.102664	-6.46346	1.02334e-10	1.54946e-09
PARD3	3139.69	-0.663261	0.0906479	-7.31689	2.53784e-13	4.92073e-12
IQSEC2	360.248	-0.662781	0.188837	-3.50981	0.000448432	0.00246253
SLC9A3	176.893	-0.662581	0.242999	-2.72668	0.00639746	0.0251416
D2HGDH	291.913	-0.661334	0.193022	-3.42621	0.000612066	0.00324556
CDH6	191.829	-0.661214	0.251246	-2.63174	0.00849489	0.0318485
CEP19	422.076	-0.661056	0.164195	-4.02604	5.67247e-05	0.000380278
BTN3A1	151.947	-0.660853	0.254089	-2.60087	0.00929881	0.0344291
SERPINB13	4846.52	-0.659028	0.0891907	-7.38898	1.47962e-13	2.95514e-12
PXK	232.393	-0.658977	0.219525	-3.00183	0.0026836	0.0118542
ANO6	1993.21	-0.65741	0.10793	-6.09105	1.12169e-09	1.5163e-08
SLC25A43	821.13	-0.656246	0.132139	-4.96633	6.82335e-07	6.40653e-06
FGF11	388.249	-0.655449	0.167502	-3.91309	9.11242e-05	0.000586754
LINC00476	277.758	-0.655416	0.201397	-3.25434	0.00113656	0.0055877
NEK11	105.703	-0.654437	0.301247	-2.17243	0.0298233	0.0904702
KLF10	2600.18	-0.654316	0.283769	-2.30581	0.0211213	0.0683958
MICAL3	2137.52	-0.653461	0.0971346	-6.72737	1.72758e-11	2.83165e-10
FAM161A	241.005	-0.652763	0.209499	-3.11583	0.00183428	0.00852312
CRYL1	204.413	-0.65259	0.236682	-2.75725	0.00582902	0.0232408
CDH13	1232.82	-0.651522	0.114831	-5.67372	1.39728e-08	1.64213e-07
PCMTD1	1189.2	-0.650964	0.111561	-5.83507	5.37664e-09	6.64902e-08
ZNF888	397.77	-0.650514	0.167045	-3.89425	9.85016e-05	0.000629099
ACAP2	10377	-0.650317	0.0847031	-7.6776	1.62095e-14	3.5269e-13
B4GALNT4	1247.64	-0.650305	0.108651	-5.98527	2.16029e-09	2.8061e-08
C8orf37	226.437	-0.650305	0.210176	-3.0941	0.00197408	0.00907511
SEC61G	1000.46	-0.64914	0.155402	-4.17716	2.95174e-05	0.000209079
SERINC2	2885.52	-0.648958	0.0903311	-7.18422	6.75944e-13	1.25431e-11
LRRC23	122.708	-0.64895	0.284485	-2.28114	0.0225401	0.0720621
CNN1	108.41	-0.648603	0.299467	-2.16586	0.0303218	0.0917247
ARHGAP5	11488.8	-0.648547	0.0782044	-8.29298	1.10443e-16	2.82669e-15
CNST	1555.42	-0.647593	0.102226	-6.33493	2.37447e-10	3.49714e-09
TCEAL1	276.413	-0.647341	0.197821	-3.27235	0.00106656	0.00529237
RAPGEF5	1638.17	-0.64693	0.108452	-5.96512	2.44456e-09	3.16584e-08
PXN	1831.81	-0.64662	0.0980619	-6.594	4.28131e-11	6.68751e-10
PDLIM7	727.802	-0.645206	0.130941	-4.92745	8.3311e-07	7.72561e-06
MIPEP	241.355	-0.643307	0.207353	-3.10247	0.00191911	0.00884355
ADGRG6	1015.34	-0.642753	0.121288	-5.29938	1.16199e-07	1.21663e-06
SHISA5	2118.76	-0.642661	0.104795	-6.13254	8.64872e-10	1.19151e-08
FAM184B	137.865	-0.642594	0.264971	-2.42515	0.0153021	0.0522861
CCSER1	214.56	-0.642502	0.2157	-2.97868	0.00289494	0.0126359
GATSL2	4016.77	-0.64229	0.0872208	-7.36396	1.78537e-13	3.53311e-12
ZNF204P	189.867	-0.641805	0.228002	-2.81491	0.00487908	0.01988
SLC25A12	295.908	-0.64165	0.186527	-3.43998	0.000581753	0.0031058
USP31	2111.88	-0.641589	0.097622	-6.57217	4.95869e-11	7.68308e-10
IGSF9	4728.69	-0.64153	0.0835168	-7.68145	1.57295e-14	3.43111e-13
ZRANB3	263.528	-0.641215	0.209717	-3.05753	0.0022317	0.0101141
STX6	3067.84	-0.640871	0.0957072	-6.69616	2.13963e-11	3.45783e-10
YEATS2	5767.68	-0.64051	0.0865654	-7.39915	1.37063e-13	2.74698e-12
CFAP126	262.587	-0.640414	0.198504	-3.2262	0.00125445	0.00609273
TCTEX1D2	494.151	-0.638982	0.163497	-3.90822	9.29778e-05	0.000598467
TRPM8	343.694	-0.638776	0.175216	-3.64566	0.000266711	0.00153539
C1orf21	866.544	-0.638315	0.126959	-5.02773	4.96326e-07	4.73993e-06
CAAP1	473.906	-0.63809	0.154543	-4.12888	3.64531e-05	0.000253324
HELZ	3532.04	-0.637987	0.0967671	-6.59302	4.30972e-11	6.71974e-10
SLC26A6	446.908	-0.637736	0.160823	-3.96546	7.32543e-05	0.000480464
IFT81	498.231	-0.637299	0.151544	-4.20536	2.60665e-05	0.000186624
DUSP18	145.406	-0.636787	0.266914	-2.38574	0.0170449	0.0572117
RIC1	2098.94	-0.636268	0.104161	-6.1085	1.00575e-09	1.37137e-08
PITX1	1805.13	-0.635963	0.0996368	-6.38281	1.73868e-10	2.59615e-09
RBMS2	831.946	-0.634906	0.12737	-4.98473	6.20486e-07	5.86728e-06
C1orf210	355.7	-0.63472	0.173335	-3.6618	0.000250448	0.00145241
EVI5L	755.173	-0.633786	0.129009	-4.91273	8.9815e-07	8.2744e-06
FAM117A	243.207	-0.63363	0.203123	-3.11943	0.001812	0.00843093
PIK3CD	243.196	-0.632759	0.205303	-3.08206	0.0020557	0.00940279
WDR27	410.066	-0.632682	0.162765	-3.88708	0.000101456	0.000646056
MAFA	283.486	-0.632015	0.190165	-3.32351	0.000888938	0.00449043
SLC39A6	2388.57	-0.631652	0.0928	-6.80659	9.99383e-12	1.67788e-10
CCDC39	221.355	-0.631212	0.221465	-2.85017	0.00436962	0.0181073
AAED1	197.734	-0.631036	0.232674	-2.71211	0.00668564	0.0260595
ZNF470	252.535	-0.630637	0.200369	-3.14739	0.00164738	0.00774634
PRRT2	203.278	-0.630412	0.233267	-2.70253	0.00688131	0.026691
SELK	635.026	-0.629951	0.142086	-4.4336	9.26736e-06	7.1795e-05
HMGCL	603.737	-0.629526	0.151068	-4.16717	3.08403e-05	0.000217283
IVNS1ABP	5419.62	-0.629286	0.0969242	-6.49256	8.43921e-11	1.28681e-09
PLXNA2	2437.95	-0.629002	0.0953984	-6.59343	4.29776e-11	6.70715e-10
LACC1	246.589	-0.628461	0.23641	-2.65835	0.00785231	0.0298409
OSBPL1A	390.156	-0.628283	0.168301	-3.73309	0.000189145	0.00112951
CRTAP	2324.11	-0.627636	0.10696	-5.86798	4.41139e-09	5.52655e-08
KDM4C	1690.11	-0.627087	0.10831	-5.78976	7.04856e-09	8.58751e-08
ATP2B4	4250.66	-0.627003	0.29166	-2.14977	0.0315731	0.0948787
CYB5D1	362.645	-0.626825	0.171243	-3.66043	0.00025179	0.00145922
PTPRZ1	2617.75	-0.625996	0.0914925	-6.84204	7.8071e-12	1.32621e-10
P3H1	462.223	-0.625939	0.155182	-4.03357	5.49347e-05	0.000369357
PIK3R1	1065.3	-0.62585	0.119041	-5.25741	1.46097e-07	1.51136e-06
TEF	923.706	-0.625683	0.123168	-5.0799	3.77632e-07	3.65489e-06
BBS9	355.212	-0.625648	0.17315	-3.61332	0.000302299	0.00172247
ACPT	156.564	-0.625272	0.265588	-2.35429	0.0185579	0.0614423
OSGIN1	203.948	-0.624597	0.220871	-2.82788	0.00468568	0.0192325
TNFSF10	3216.19	-0.624362	0.103043	-6.05921	1.36793e-09	1.82631e-08
PCMTD2	245.206	-0.623898	0.207423	-3.00785	0.00263103	0.0116729
OBSCN	979.009	-0.622793	0.133744	-4.6566	3.21479e-06	2.69344e-05
TSPAN31	410.436	-0.622436	0.163848	-3.79887	0.000145357	0.00089176
XPR1	6447.96	-0.622374	0.0861842	-7.22144	5.14416e-13	9.65983e-12
IVL	1108.54	-0.620361	0.128281	-4.83596	1.32506e-06	1.1898e-05
TUBG2	218.58	-0.620255	0.225332	-2.75262	0.00591197	0.0235172
GPX4	2651.15	-0.61825	0.0941245	-6.56843	5.08474e-11	7.86428e-10
CARD10	322.946	-0.61758	0.183783	-3.36037	0.000778388	0.00400459
MAP4	3359.59	-0.616745	0.0935511	-6.5926	4.32184e-11	6.73256e-10
ATP5G1	1278.01	-0.615085	0.11077	-5.55283	2.81083e-08	3.19474e-07
PPARGC1B	673.466	-0.614948	0.143232	-4.29336	1.75989e-05	0.000129488
KLHL21	1265.27	-0.61492	0.110076	-5.58631	2.3194e-08	2.66422e-07
SRPK2	1165.73	-0.614881	0.113181	-5.43274	5.5494e-08	6.11815e-07
PHF20	1249.73	-0.614706	0.115887	-5.30435	1.13074e-07	1.18608e-06
SMYD3	627.293	-0.614624	0.144333	-4.25836	2.05932e-05	0.000149986
RABGGTA	705.891	-0.614383	0.132871	-4.62391	3.76576e-06	3.12475e-05
TFE3	1567.16	-0.614056	0.108576	-5.65556	1.5534e-08	1.8145e-07
MMAA	135.084	-0.613854	0.271487	-2.26108	0.0237542	0.0750556
BOC	147.053	-0.613723	0.279265	-2.19764	0.0279751	0.0858434
TFEB	131.558	-0.612739	0.284556	-2.15332	0.0312939	0.0942691
SLC45A3	179.924	-0.612533	0.254882	-2.40321	0.016252	0.0550097
C14orf159	680.799	-0.610937	0.133776	-4.56687	4.95054e-06	4.02473e-05
HS6ST1	1727.22	-0.610727	0.0998755	-6.11488	9.66277e-10	1.32068e-08
FRMD8	1393.93	-0.610336	0.106517	-5.72995	1.00463e-08	1.20779e-07
TNFRSF25	338.934	-0.609862	0.176322	-3.4588	0.000542583	0.00291288
ARPC2	3830.34	-0.609816	0.0840809	-7.25273	4.08447e-13	7.7457e-12
HOOK3	1937.23	-0.609661	0.122346	-4.9831	6.25749e-07	5.91057e-06
SRF	1398.82	-0.609472	0.106811	-5.70607	1.15611e-08	1.37272e-07
KIAA0895	368.43	-0.60917	0.176779	-3.44594	0.000569073	0.00304658
PIK3C2B	2328.84	-0.60913	0.0990883	-6.14735	7.87887e-10	1.09297e-08
INHBB	519.013	-0.608877	0.159805	-3.81013	0.000138893	0.000857275
TCEA3	170.552	-0.608832	0.264595	-2.30099	0.0213919	0.0691814
SPESP1	231.48	-0.608766	0.21319	-2.85551	0.00429672	0.0178438
TPD52L1	1286.69	-0.608255	0.12003	-5.06753	4.03001e-07	3.87868e-06
ATXN7L1	254.613	-0.607837	0.206298	-2.94641	0.00321489	0.0138851
KIF3A	542.622	-0.607729	0.149955	-4.05276	5.06177e-05	0.000342259
HR	4377.44	-0.607567	0.0933281	-6.51001	7.51469e-11	1.1499e-09
HOMEZ	932.417	-0.607034	0.11943	-5.08277	3.71969e-07	3.60613e-06
TPD52	3906.7	-0.605748	0.113482	-5.33784	9.40579e-08	9.99351e-07
JADE2	1381.88	-0.605744	0.113014	-5.35989	8.32744e-08	8.92462e-07
EPHA2	4388.94	-0.60538	0.105334	-5.74727	9.06978e-09	1.09267e-07
FAM212B	802.687	-0.605169	0.130234	-4.64679	3.37135e-06	2.81914e-05
SMIM14	262	-0.605129	0.220705	-2.7418	0.00611034	0.024206
ABCB6	1039.53	-0.605079	0.118388	-5.11098	3.20498e-07	3.13706e-06
PSAP	8912.87	-0.605063	0.0778213	-7.77503	7.54306e-15	1.67714e-13
SLC6A6	2346.36	-0.604232	0.114201	-5.29094	1.21692e-07	1.27184e-06
MAP3K6	1103.72	-0.60421	0.130349	-4.63532	3.56387e-06	2.9672e-05
TRIM66	240.61	-0.603715	0.204973	-2.94534	0.00322599	0.0139226
SHROOM2	1453.05	-0.603542	0.107631	-5.60751	2.05253e-08	2.37029e-07
UNC119	1005.39	-0.603228	0.117571	-5.13074	2.88605e-07	2.854e-06
TMEM123	3977.06	-0.60247	0.0953202	-6.32049	2.60738e-10	3.82386e-09
EVA1B	191.346	-0.602087	0.247892	-2.42883	0.0151478	0.0518513
FLYWCH1	1198.3	-0.601308	0.110792	-5.42736	5.71923e-08	6.29334e-07
RRAGA	1679.27	-0.600395	0.0998232	-6.01458	1.80354e-09	2.36583e-08
NXN	699.622	-0.59982	0.132182	-4.53782	5.68375e-06	4.57134e-05
GPR161	780.556	-0.599102	0.130224	-4.60053	4.21411e-06	3.46351e-05
PIK3R2	2002.95	-0.598968	0.101178	-5.91996	3.22024e-09	4.09367e-08
CCDC28A	173.593	-0.598329	0.245523	-2.43696	0.0148114	0.0508913
ZMAT3	967.106	-0.598028	0.125402	-4.7689	1.85233e-06	1.61295e-05
KIAA1522	10450.3	-0.59796	0.0748047	-7.99361	1.31043e-15	3.10548e-14
TMEM159	713.272	-0.597859	0.163749	-3.65106	0.000261158	0.00150845
KLF13	277.143	-0.596904	0.209131	-2.85422	0.00431433	0.0179083
CD59	4225.51	-0.596451	0.0864918	-6.89604	5.34728e-12	9.21953e-11
STARD9	240.723	-0.595176	0.205803	-2.89197	0.00382835	0.0161471
TNFRSF21	1903.56	-0.594303	0.0986874	-6.02207	1.72198e-09	2.27091e-08
MIDN	3158.97	-0.594235	0.0976444	-6.08571	1.15979e-09	1.56536e-08
WNT2B	302.337	-0.593538	0.18463	-3.21475	0.00130558	0.00630916
MYCBP2	4528.04	-0.59303	0.0854654	-6.93883	3.95352e-12	6.92708e-11
EBLN3	2184.42	-0.59298	0.0985742	-6.01557	1.79255e-09	2.3532e-08
RNF32	340.931	-0.592587	0.17636	-3.36009	0.000779165	0.0040062
NBEAL1	1259.64	-0.59238	0.117452	-5.04358	4.56898e-07	4.3852e-06
LOC284023	562.127	-0.591798	0.147364	-4.01591	5.9218e-05	0.000395153
PIGZ	291.067	-0.591572	0.194048	-3.04859	0.00229921	0.0103765
MGST2	709.587	-0.591406	0.131879	-4.48444	7.31049e-06	5.74334e-05
LYRM7	598.932	-0.591358	0.147678	-4.00437	6.21824e-05	0.000413178
HS2ST1	1800.85	-0.591096	0.110365	-5.35581	8.51747e-08	9.11132e-07
ARL4C	2978.92	-0.591024	0.088464	-6.68096	2.37387e-11	3.80789e-10
PLEKHM3	442.207	-0.590973	0.161483	-3.65966	0.000252548	0.00146312
PDGFB	232.702	-0.590962	0.215671	-2.74011	0.00614179	0.024325
UBE4B	3234.85	-0.590773	0.0868996	-6.79834	1.05833e-11	1.77512e-10
BTN3A2	183.704	-0.590613	0.230789	-2.5591	0.0104943	0.0381121
ETFB	865.306	-0.590434	0.133504	-4.42261	9.75172e-06	7.54121e-05
FRMD6	7019.89	-0.590135	0.0866166	-6.81319	9.54553e-12	1.60886e-10
SH2D2A	149.348	-0.589428	0.262244	-2.24763	0.0245997	0.0772419
ZNF658	172.479	-0.589126	0.237372	-2.48186	0.0130698	0.0457535
NMNAT3	211.527	-0.588579	0.216701	-2.71609	0.00660571	0.0258284
PEX3	390.951	-0.587582	0.167866	-3.50031	0.000464722	0.00253586
STON2	6176.5	-0.587522	0.0783813	-7.49569	6.59492e-14	1.3694e-12
PMM1	366.544	-0.587393	0.170054	-3.45416	0.000552004	0.00296254
SAMD12	2311.26	-0.587283	0.095514	-6.14866	7.81391e-10	1.08603e-08
TNNI1	159.157	-0.586995	0.24904	-2.35703	0.0184219	0.0610965
RPS6KA5	579.922	-0.58695	0.154121	-3.80838	0.000139881	0.000862653
INF2	833.973	-0.586756	0.125521	-4.67458	2.94561e-06	2.47752e-05
TCF7L1	257.168	-0.585805	0.207951	-2.81703	0.00484695	0.0197724
TRIB1	1851.03	-0.585773	0.122765	-4.77151	1.82849e-06	1.5938e-05
TMEM63B	1560.09	-0.58565	0.109072	-5.36938	7.90077e-08	8.48842e-07
KATNAL2	169.743	-0.5854	0.238913	-2.45026	0.0142752	0.0493532
WDR91	347.187	-0.5844	0.174947	-3.34044	0.000836445	0.00426141
FOXO6	237.635	-0.584375	0.21384	-2.73276	0.00628058	0.0247725
SIRPA	460.288	-0.584167	0.15963	-3.65951	0.000252694	0.00146347
C19orf66	260.391	-0.584119	0.203423	-2.87144	0.00408604	0.0170795
FAM210A	983.006	-0.58406	0.123798	-4.71783	2.38374e-06	2.04274e-05
DCST2	162.714	-0.583576	0.251703	-2.31851	0.0204215	0.0664661
TFDP2	2118.62	-0.583126	0.0946303	-6.16215	7.1763e-10	1.00306e-08
CUL7	516.524	-0.582808	0.153984	-3.78487	0.000153792	0.00093751
CCDC24	420.811	-0.582177	0.16726	-3.48068	0.000500145	0.00270354
NEFL	189.629	-0.581907	0.253652	-2.29411	0.021784	0.0702128
NCOA3	4452.57	-0.5819	0.0918478	-6.33548	2.36608e-10	3.48775e-09
HMOX1	150.971	-0.581789	0.25455	-2.28556	0.0222799	0.0714379
SEC22C	415.773	-0.58149	0.184234	-3.15625	0.0015981	0.00753927
PRKCE	330.213	-0.581431	0.192531	-3.01994	0.00252826	0.0112834
KIAA1143	882.051	-0.581228	0.122295	-4.75267	2.00751e-06	1.7393e-05
HELB	238.847	-0.581156	0.206889	-2.80903	0.00496916	0.0202136
TNIK	1914.51	-0.581053	0.0994683	-5.84159	5.17034e-09	6.39848e-08
B3GNT5	5169.92	-0.58043	0.109732	-5.28952	1.22639e-07	1.28096e-06
CD44	13425.3	-0.580363	0.0753026	-7.70708	1.28731e-14	2.82586e-13
PLAG1	559.54	-0.579586	0.144313	-4.01617	5.9152e-05	0.000394865
CORO2A	2264.88	-0.579044	0.0972211	-5.95595	2.58571e-09	3.33363e-08
KLHL8	484.23	-0.578578	0.152127	-3.80326	0.000142804	0.000877654
SEMA6D	931.238	-0.577507	0.127772	-4.5198	6.18967e-06	4.93459e-05
ECHDC2	370.472	-0.57726	0.175052	-3.29765	0.000974966	0.00488359
BMP2	194.56	-0.577021	0.23951	-2.40917	0.0159888	0.0542462
RTN4	3782.15	-0.576141	0.0873542	-6.59546	4.23953e-11	6.62825e-10
COX7A2	1925.7	-0.574668	0.0985548	-5.83095	5.51141e-09	6.80108e-08
SLC41A1	2269.33	-0.57466	0.0944862	-6.08195	1.18733e-09	1.60128e-08
BTD	251.486	-0.573341	0.204578	-2.80255	0.00507006	0.0205756
EXOSC5	544.257	-0.57262	0.147151	-3.89138	9.96746e-05	0.000636121
SWT1	500.625	-0.572231	0.153441	-3.72932	0.000191996	0.00114576
SERPINB6	396.996	-0.571952	0.167582	-3.41296	0.000642607	0.00338157
PGRMC2	1006.64	-0.571716	0.120032	-4.76305	1.90691e-06	1.6588e-05
KCTD9	1579.35	-0.57171	0.108597	-5.2645	1.40568e-07	1.45765e-06
MCL1	11891.4	-0.571114	0.0933327	-6.11912	9.40947e-10	1.28912e-08
BLOC1S2	567.085	-0.570595	0.145723	-3.91562	9.01724e-05	0.000582579
ERO1B	537.037	-0.570426	0.149071	-3.82654	0.000129957	0.000807603
PPARD	1130.23	-0.570221	0.11631	-4.90258	9.45855e-07	8.68719e-06
IRF2BP2	5814.42	-0.570081	0.096061	-5.93458	2.94606e-09	3.77288e-08
ALDH3A2	3095.07	-0.569794	0.0920936	-6.18711	6.12758e-10	8.62756e-09
LOC100506548	488.666	-0.569502	0.156884	-3.63009	0.000283327	0.0016267
DARS	3060.65	-0.568985	0.103799	-5.48161	4.21468e-08	4.70411e-07
GNB5	546.177	-0.568472	0.152219	-3.73458	0.000188032	0.00112442
TMEM120B	370.631	-0.567189	0.175918	-3.22417	0.00126337	0.00613261
ANK3	2690.98	-0.567176	0.0927631	-6.11425	9.70139e-10	1.32491e-08
NLGN2	744.788	-0.567021	0.137598	-4.12085	3.77473e-05	0.000261687
MAPK11	210.185	-0.566461	0.225582	-2.5111	0.0120355	0.0426774
ABHD6	282.363	-0.565975	0.198826	-2.84659	0.00441905	0.0182868
ATXN3	570.359	-0.565747	0.143922	-3.93091	8.46243e-05	0.000548376
WDPCP	223.014	-0.565419	0.211648	-2.67151	0.00755115	0.0288971
LOC100130744	233.537	-0.565229	0.207673	-2.72173	0.00649415	0.0254694
CTDSPL	923.632	-0.565169	0.127845	-4.42073	9.83694e-06	7.60031e-05
LAD1	5992.47	-0.564865	0.0849559	-6.64892	2.95261e-11	4.71e-10
PC	833.175	-0.564697	0.127107	-4.4427	8.88374e-06	6.90398e-05
VLDLR	1770.2	-0.564121	0.10542	-5.35119	8.73767e-08	9.32378e-07
FAM114A1	1592.73	-0.5641	0.109529	-5.15025	2.6014e-07	2.59629e-06
DNAL4	194.855	-0.564047	0.225821	-2.49776	0.012498	0.0440463
ZC3HAV1L	314.675	-0.563984	0.18849	-2.99211	0.00277052	0.0121821
TIMP1	585.168	-0.563492	0.152146	-3.70363	0.000212539	0.00125704
HBP1	1413.12	-0.563275	0.114211	-4.93187	8.14476e-07	7.56093e-06
LOC100507577	137.086	-0.562667	0.263561	-2.13487	0.0327719	0.0978441
SBF2	3825.8	-0.562539	0.102437	-5.49158	3.98364e-08	4.45734e-07
GAPDH	69088.3	-0.56247	0.211134	-2.66404	0.00772078	0.0294446
TTC3	4368.4	-0.562151	0.0989016	-5.68395	1.3162e-08	1.55107e-07
RABL3	808.844	-0.561982	0.125671	-4.47187	7.75402e-06	6.07246e-05
RTKN	1546.96	-0.561439	0.106169	-5.28816	1.2355e-07	1.28892e-06
EEF2K	1258.8	-0.561398	0.116788	-4.807	1.53214e-06	1.35185e-05
PNPLA6	1082.86	-0.561297	0.116369	-4.82345	1.41099e-06	1.25715e-05
TAX1BP3	218.493	-0.561	0.220611	-2.54293	0.0109926	0.0395395
NAP1L1	5313.35	-0.560366	0.08173	-6.8563	7.06645e-12	1.20394e-10
IGSF3	9965.32	-0.560261	0.0775177	-7.22752	4.91903e-13	9.25721e-12
ERV3-1	182.48	-0.557172	0.245566	-2.26893	0.0232728	0.0739999
IER5	2331.78	-0.556754	0.102242	-5.44543	5.16802e-08	5.71226e-07
FLNB	8497.48	-0.556483	0.0888549	-6.26282	3.78076e-10	5.44758e-09
NR1D1	1119.85	-0.556169	0.127147	-4.37423	1.21861e-05	9.22153e-05
PON2	2125.87	-0.556137	0.0951295	-5.84611	5.03212e-09	6.24084e-08
RNF122	226.97	-0.555968	0.21927	-2.53554	0.0112273	0.0402832
ENGASE	1900.82	-0.555631	0.0970967	-5.72245	1.04997e-08	1.25705e-07
LRSAM1	697.329	-0.555055	0.133904	-4.14517	3.39555e-05	0.0002374
CAMKK1	215.007	-0.552981	0.23838	-2.31974	0.0203549	0.0663116
MBD5	492.092	-0.552946	0.158799	-3.48204	0.000497614	0.00269318
GOLGA8B	237.885	-0.552374	0.224393	-2.46163	0.0138305	0.0479985
IL4R	670.748	-0.551982	0.137365	-4.01835	5.86064e-05	0.000391525
LOC100288152	499.052	-0.551887	0.171625	-3.21566	0.00130143	0.00629439
SAMD8	1079.56	-0.551797	0.121266	-4.55032	5.35656e-06	4.33849e-05
DUSP6	3020.96	-0.550655	0.125329	-4.39367	1.11455e-05	8.53497e-05
AVPI1	399.849	-0.550538	0.165614	-3.32422	0.000886666	0.00448027
CDK17	990.042	-0.550489	0.133555	-4.1218	3.75922e-05	0.000260715
GRINA	2833.36	-0.549633	0.090133	-6.09802	1.07392e-09	1.45628e-08
PPARG	945.942	-0.54922	0.122101	-4.49808	6.85694e-06	5.4141e-05
ARHGEF40	539.25	-0.548467	0.147485	-3.7188	0.000200173	0.0011892
DESI1	579.735	-0.547755	0.14601	-3.75149	0.000175788	0.00105705
CD58	727.605	-0.547723	0.132198	-4.14319	3.42508e-05	0.000239174
LRRFIP1	1236.04	-0.547164	0.116503	-4.69656	2.64585e-06	2.25171e-05
VPS36	662.847	-0.546877	0.138817	-3.93955	8.1635e-05	0.000530996
CHIC1	636.695	-0.546062	0.143444	-3.8068	0.000140778	0.000867053
OTUD6B-AS1	834.165	-0.544849	0.128573	-4.23764	2.25877e-05	0.000163283
SYNGR2	3904.54	-0.544584	0.0889445	-6.12274	9.19787e-10	1.26213e-08
ATG10	350.996	-0.543779	0.176337	-3.08374	0.00204415	0.00935489
NME7	180.273	-0.543463	0.232621	-2.33626	0.019478	0.0639979
CEBPZOS	1263.67	-0.54339	0.108545	-5.00611	5.55398e-07	5.2749e-06
C9orf72	859.523	-0.542994	0.129555	-4.19123	2.7745e-05	0.000197658
ADAMTSL5	170.895	-0.542735	0.23958	-2.26535	0.0234909	0.0744778
CBWD5	227.161	-0.542639	0.222808	-2.43546	0.014873	0.0510826
FAM127A	529.478	-0.542394	0.146978	-3.6903	0.000223989	0.00131486
AGRN	10976.4	-0.542047	0.0783872	-6.915	4.67871e-12	8.09914e-11
MITD1	301.685	-0.540234	0.193274	-2.79517	0.00518723	0.0209739
ST3GAL3	304.248	-0.539364	0.19112	-2.82212	0.00477073	0.0195167
DENND5B	274.401	-0.538992	0.194841	-2.76633	0.00566919	0.0226873
EIF2D	953.801	-0.537171	0.118552	-4.53112	5.86728e-06	4.70505e-05
KCNQ1OT1	1816.3	-0.537123	0.125478	-4.28063	1.86365e-05	0.000136483
FAM43A	2665.17	-0.536905	0.118245	-4.54063	5.60871e-06	4.52151e-05
AFF1	2331.41	-0.536279	0.105024	-5.10625	3.28618e-07	3.2129e-06
PPME1	1192.13	-0.535706	0.111871	-4.78862	1.67931e-06	1.47118e-05
HOMER3	971.569	-0.535553	0.137232	-3.90252	9.5195e-05	0.000610463
ABCC1	551.297	-0.535056	0.182128	-2.93781	0.00330542	0.0142086
CLDND1	3810.99	-0.534881	0.0838394	-6.37983	1.77283e-10	2.64257e-09
PNKD	1205.43	-0.534562	0.111038	-4.8142	1.47788e-06	1.30865e-05
BRE	678.32	-0.534537	0.153184	-3.4895	0.000483927	0.00262738
ADCY9	682.506	-0.534497	0.134104	-3.98569	6.7283e-05	0.000444845
CTSD	12943.9	-0.533616	0.0905701	-5.89174	3.82139e-09	4.82237e-08
PRKACB	880.795	-0.533036	0.130867	-4.07312	4.63867e-05	0.000316125
IGIP	286.441	-0.532704	0.197346	-2.69934	0.00694773	0.0269003
KLHL12	2057.88	-0.532155	0.0974217	-5.46239	4.69774e-08	5.21247e-07
DSC2	11545.5	-0.531811	0.0777301	-6.84176	7.82244e-12	1.32751e-10
ZNF484	517.318	-0.531483	0.150822	-3.52391	0.000425226	0.00234492
THBS3	506.128	-0.531414	0.159999	-3.32135	0.000895837	0.00452132
MAP3K1	3067.72	-0.53029	0.106974	-4.95719	7.15213e-07	6.69703e-06
DSG2	8533.27	-0.529768	0.0900665	-5.88196	4.0544e-09	5.0978e-08
KIF16B	815.599	-0.529026	0.134214	-3.94166	8.09184e-05	0.000527129
C1orf116	3064.74	-0.528737	0.104112	-5.07856	3.80299e-07	3.67452e-06
NRARP	901.443	-0.528274	0.122114	-4.32607	1.51796e-05	0.000112889
POLD4	287.015	-0.528008	0.189633	-2.78437	0.00536325	0.021593
TBC1D22A	566.384	-0.52725	0.154662	-3.40905	0.000651902	0.00342735
GNAL	296.177	-0.525998	0.188353	-2.79262	0.00522835	0.0211089
PXDC1	418.988	-0.525817	0.162683	-3.23216	0.0012286	0.005984
RPLP0	16566.7	-0.525787	0.0772395	-6.80722	9.95012e-12	1.67379e-10
DOCK7	1614.46	-0.525586	0.1063	-4.94435	7.64002e-07	7.11585e-06
FAT1	14882	-0.525245	0.0738584	-7.11151	1.14783e-12	2.09398e-11
LOC101929147	308.783	-0.525064	0.186875	-2.8097	0.00495879	0.0201809
PDCD4	1324.67	-0.524922	0.128284	-4.09188	4.27884e-05	0.000294155
EFCAB7	255.315	-0.524918	0.20734	-2.53167	0.0113519	0.0406626
KREMEN1	2372.16	-0.524571	0.0926564	-5.66147	1.50082e-08	1.75904e-07
SIM2	266.556	-0.524558	0.197679	-2.65359	0.00796413	0.0301795
CFAP36	230.357	-0.524375	0.211857	-2.47513	0.0133186	0.0465208
RPLP1	7848.46	-0.524029	0.0856271	-6.11989	9.36402e-10	1.28391e-08
PCBD1	605.936	-0.523735	0.150567	-3.47842	0.00050437	0.00272297
TBC1D32	420.574	-0.523597	0.162029	-3.23149	0.00123145	0.00599461
RNF19A	2708.41	-0.5235	0.114521	-4.57119	4.84951e-06	3.94817e-05
PYY2	166.667	-0.523229	0.245671	-2.1298	0.0331885	0.0989584
TTC37	3201.55	-0.522606	0.0861666	-6.06506	1.31907e-09	1.77048e-08
TMEM39B	568.306	-0.5226	0.142969	-3.65533	0.000256849	0.00148505
NPDC1	994.964	-0.522535	0.12032	-4.3429	1.40617e-05	0.000105164
OPTN	868.272	-0.519011	0.159165	-3.26084	0.00111082	0.0054752
DBT	1439.13	-0.518883	0.108162	-4.79729	1.60827e-06	1.41325e-05
RNF138P1	254.908	-0.518883	0.200103	-2.59308	0.00951208	0.0351059
P4HA2	2611.51	-0.517264	0.109174	-4.73799	2.15852e-06	1.86266e-05
TMEM8B	296.602	-0.516921	0.192107	-2.6908	0.00712811	0.0275123
CERK	1228.88	-0.516429	0.11001	-4.6944	2.6739e-06	2.27446e-05
GRAMD4	617.994	-0.516029	0.138	-3.73935	0.0001845	0.00110444
SDHA	2700.47	-0.515958	0.0906075	-5.69443	1.23788e-08	1.46476e-07
PIM2	347.267	-0.515739	0.188698	-2.73315	0.00627324	0.0247548
RPLP2	4241.06	-0.51466	0.0825949	-6.23114	4.63066e-10	6.59517e-09
CAMSAP2	5273.39	-0.514181	0.0832835	-6.17386	6.66415e-10	9.36015e-09
NDUFS2	1963.21	-0.513939	0.0964898	-5.32635	1.00206e-07	1.06141e-06
ADD3	2851.78	-0.513329	0.0958437	-5.3559	8.51323e-08	9.11132e-07
HAS3	19642.2	-0.513259	0.100195	-5.12259	3.01365e-07	2.9666e-06
PLEKHG6	1163.3	-0.512904	0.112626	-4.55404	5.26253e-06	4.26633e-05
SDC1	26061.7	-0.512797	0.100141	-5.12077	3.04295e-07	2.99203e-06
EIF4B	7273.35	-0.512519	0.0862838	-5.93992	2.85162e-09	3.6628e-08
ECE2	894.876	-0.512492	0.125279	-4.0908	4.29896e-05	0.000295257
ITGA2	9936.1	-0.51238	0.0771326	-6.64284	3.07696e-11	4.8903e-10
DAB1	1211.23	-0.511781	0.126527	-4.04485	5.23573e-05	0.000353468
SPATS2	986.489	-0.511732	0.117512	-4.35473	1.33229e-05	0.000100072
RNF13	1819.36	-0.511702	0.0990484	-5.16618	2.38924e-07	2.39841e-06
THRA	432.797	-0.510271	0.163138	-3.12786	0.00176085	0.00821066
PRKCD	705.819	-0.510126	0.140032	-3.64294	0.000269544	0.00155118
RPS12	3306.2	-0.509758	0.0912572	-5.58595	2.32431e-08	2.66809e-07
DSG1	195.197	-0.509612	0.232255	-2.1942	0.0282212	0.0865218
CSTB	10432.1	-0.509549	0.227077	-2.24395	0.0248354	0.0778829
ADGRB2	873.116	-0.509382	0.131093	-3.88566	0.000102051	0.000648651
HDAC1	5072.56	-0.508952	0.0827603	-6.14971	7.76262e-10	1.07977e-08
ST6GALNAC4	401.451	-0.508739	0.181376	-2.80489	0.00503333	0.020441
KIAA0319L	1600.09	-0.507766	0.112217	-4.52487	6.0432e-06	4.82897e-05
COX5B	3452.07	-0.50765	0.0896941	-5.65979	1.51556e-08	1.77271e-07
ZNF274	596.515	-0.507347	0.140564	-3.60938	0.000306933	0.00174657
EPB41L1	8337.32	-0.507091	0.0993492	-5.10412	3.3233e-07	3.24736e-06
LACTB	332.653	-0.506798	0.185994	-2.72481	0.00643384	0.0252731
WDR13	873.59	-0.506312	0.126238	-4.01078	6.05183e-05	0.000402896
NRSN2	895.03	-0.506011	0.120988	-4.18232	2.88554e-05	0.000204894
CEP68	732.207	-0.504735	0.136447	-3.69913	0.000216344	0.00127692
VEGFB	350.045	-0.504504	0.189949	-2.656	0.00790741	0.0300127
MSRB2	222.134	-0.504314	0.211116	-2.3888	0.0169033	0.0568024
RPS21	6593.09	-0.504013	0.0852889	-5.90948	3.43192e-09	4.34995e-08
ZSCAN30	218.302	-0.503429	0.213988	-2.3526	0.0186427	0.0616758
CHMP1B	2534.26	-0.503074	0.0926648	-5.42897	5.66808e-08	6.24102e-07
CBX6	3550.96	-0.502937	0.0845614	-5.9476	2.72104e-09	3.5055e-08
REPS1	1392.59	-0.502565	0.108176	-4.6458	3.38768e-06	2.83142e-05
IARS2	4815.2	-0.501621	0.0805965	-6.22385	4.85095e-10	6.89186e-09
LDHB	5223.43	-0.501437	0.0930281	-5.39016	7.03936e-08	7.61979e-07
ABCA2	2724	-0.500629	0.100436	-4.98455	6.21074e-07	5.86963e-06
IFT172	409.133	-0.50061	0.166182	-3.01242	0.00259178	0.0115325
PLLP	474.835	-0.500254	0.154232	-3.24351	0.00118065	0.00577164
TLR2	249.504	-0.500214	0.21508	-2.32571	0.0200338	0.0654508
STX4	326.932	-0.499597	0.181917	-2.74628	0.00602745	0.023905
YPEL5	1507.73	-0.499496	0.114078	-4.37857	1.19462e-05	9.05984e-05
RNF187	5208.89	-0.498116	0.0815673	-6.1068	1.01648e-09	1.38492e-08
C5orf15	1872.36	-0.497911	0.0972022	-5.12243	3.01623e-07	2.96745e-06
LAMB2	901.992	-0.497013	0.127907	-3.88575	0.000102016	0.000648651
FAM53B	1422.86	-0.496995	0.111849	-4.44343	8.85356e-06	6.88362e-05
ARSK	265.953	-0.496766	0.200976	-2.47177	0.0134446	0.0468757
CPNE8	246.208	-0.496597	0.203578	-2.43935	0.0147138	0.0506569
MTURN	509.031	-0.495927	0.148973	-3.32896	0.000871702	0.00441499
AP3S1	1344.65	-0.495832	0.106066	-4.67476	2.94291e-06	2.47646e-05
VPS13D	4226.55	-0.49569	0.101116	-4.90221	9.47665e-07	8.69012e-06
INAFM1	309.06	-0.495535	0.184057	-2.69229	0.00709637	0.0274082
KMT2E-AS1	663.006	-0.495437	0.148607	-3.33386	0.000856487	0.00435452
AGL	2001.65	-0.494828	0.0982569	-5.03606	4.75211e-07	4.54833e-06
RAPGEF1	1814.46	-0.494401	0.106283	-4.65175	3.29135e-06	2.75358e-05
TMEM102	328.64	-0.494367	0.179182	-2.75903	0.00579736	0.0231466
PLXNB2	11232.8	-0.494231	0.0872827	-5.66242	1.49255e-08	1.75052e-07
CDC42	8423.89	-0.494095	0.0769926	-6.41743	1.38593e-10	2.08566e-09
CTSL	640.214	-0.493933	0.1474	-3.35097	0.000805305	0.00412587
DUOXA1	1280.19	-0.493503	0.108579	-4.54512	5.49043e-06	4.43237e-05
OCRL	1192.14	-0.493124	0.115675	-4.263	2.01704e-05	0.000146969
FADS3	252.476	-0.492969	0.211852	-2.32695	0.0199677	0.0652597
ASIC1	351.977	-0.492828	0.172867	-2.85092	0.00435935	0.0180735
PACS1	1073.85	-0.49257	0.114604	-4.29801	1.72337e-05	0.000127181
TES	1567.24	-0.492007	0.102399	-4.80482	1.54894e-06	1.36458e-05
ZNF219	1154.47	-0.491846	0.133102	-3.69527	0.000219657	0.00129379
MAN2C1	872.996	-0.49178	0.12656	-3.88576	0.000102012	0.000648651
AACS	660.806	-0.491772	0.136946	-3.59099	0.000329424	0.00186411
PABPC1	57833.5	-0.491749	0.0742368	-6.62405	3.49478e-11	5.51378e-10
IL20RA	814.054	-0.491654	0.126203	-3.89575	9.78948e-05	0.000626101
GGT6	1026.5	-0.491646	0.124173	-3.95937	7.51481e-05	0.000491951
HDAC8	394.379	-0.491301	0.167282	-2.93695	0.00331453	0.0142407
FMNL2	1489.07	-0.491111	0.10881	-4.51348	6.3774e-06	5.06556e-05
RAB18	1858.65	-0.490557	0.0972976	-5.04182	4.61124e-07	4.4184e-06
RALGPS2	4467.9	-0.490348	0.0834765	-5.87409	4.25181e-09	5.3305e-08
ITPKC	1849.19	-0.490255	0.109799	-4.46503	8.0056e-06	6.26097e-05
GGPS1	994.832	-0.48943	0.116561	-4.19891	2.68208e-05	0.000191628
FASTKD1	506.628	-0.489259	0.153998	-3.17704	0.00148785	0.00708491
SH3YL1	1396.15	-0.488865	0.120509	-4.05666	4.97785e-05	0.000336848
PPIP5K1	584.323	-0.488299	0.14647	-3.33378	0.000856747	0.00435457
TRAF7	2756.83	-0.487607	0.0919562	-5.3026	1.14165e-07	1.1968e-06
ATP5G3	2782.18	-0.487397	0.092212	-5.28561	1.25284e-07	1.30622e-06
ASPG	205.218	-0.487061	0.221109	-2.20282	0.0276078	0.0848971
SHC3	563.811	-0.485872	0.14342	-3.38776	0.000704664	0.00367455
ASUN	734.886	-0.485679	0.131375	-3.69691	0.000218242	0.00128681
CAPG	853.197	-0.484911	0.124498	-3.89495	9.82206e-05	0.000627769
MOB3B	367.389	-0.484887	0.169699	-2.85734	0.00427203	0.0177626
BPGM	550.606	-0.484807	0.151067	-3.20921	0.00133099	0.00641223
PGBD2	525.519	-0.484443	0.155736	-3.11067	0.00186663	0.00865253
STOML1	248.017	-0.484219	0.202209	-2.39464	0.0166366	0.0560491
44083	4972.74	-0.484014	0.0831294	-5.82241	5.80034e-09	7.13722e-08
AMZ2	1487.19	-0.483913	0.103327	-4.68332	2.82267e-06	2.38341e-05
HCAR2	436.418	-0.483837	0.159705	-3.02956	0.00244911	0.0109784
BLOC1S6	1255.65	-0.483295	0.111316	-4.34165	1.41417e-05	0.000105671
AASDH	371.079	-0.483149	0.170562	-2.83269	0.00461584	0.0189815
F11R	15019.4	-0.483011	0.0775732	-6.22652	4.76921e-10	6.78131e-09
IDH3A	1682.04	-0.482551	0.100928	-4.78112	1.74318e-06	1.52404e-05
ZNF782	778.044	-0.482158	0.130443	-3.6963	0.000218761	0.00128943
BTBD2	2378.96	-0.482117	0.09183	-5.25011	1.52012e-07	1.56768e-06
FAM214B	599.779	-0.481969	0.14166	-3.40228	0.000668258	0.00350374
CAT	1878.27	-0.481841	0.109443	-4.40269	1.06918e-05	8.21674e-05
SH3GLB1	3416.67	-0.481304	0.0865515	-5.56089	2.68399e-08	3.05861e-07
XYLT2	1994.91	-0.480482	0.0970631	-4.9502	7.41376e-07	6.91577e-06
RFFL	268.069	-0.480087	0.198188	-2.42238	0.015419	0.0526024
PARP4	1966.01	-0.479807	0.102893	-4.66315	3.11409e-06	2.61161e-05
SIX5	1072.81	-0.479564	0.113761	-4.21555	2.49165e-05	0.000178687
CASP4	482.551	-0.479078	0.15569	-3.07712	0.00209014	0.00953252
ANKRD36B	399.453	-0.478699	0.171457	-2.79195	0.00523908	0.0211423
ELF1	1471.96	-0.478662	0.108574	-4.40863	1.04026e-05	8.00868e-05
NDUFB5	2780.3	-0.478661	0.0953943	-5.01771	5.22905e-07	4.98227e-06
GPATCH2L	1285.62	-0.478232	0.115759	-4.13126	3.60773e-05	0.000250813
GSTO1	612.566	-0.477804	0.140419	-3.40272	0.000667196	0.00349924
RAI1	3081.43	-0.477736	0.092083	-5.1881	2.12445e-07	2.14757e-06
ELOVL1	2456.82	-0.47738	0.0921048	-5.18301	2.18339e-07	2.20071e-06
TNFRSF10B	3278.59	-0.477283	0.089701	-5.32082	1.033e-07	1.0915e-06
STAT6	4049.22	-0.477212	0.0927758	-5.14372	2.69356e-07	2.68053e-06
NDFIP2	1124.91	-0.477155	0.11496	-4.15063	3.3156e-05	0.000232396
LINC00094	529.103	-0.477028	0.160446	-2.97314	0.00294771	0.0128371
NCKIPSD	648.269	-0.476709	0.137479	-3.4675	0.000525321	0.00282724
ARTN	864.527	-0.476433	0.14575	-3.26883	0.00107993	0.0053458
SNORA32	289.249	-0.476287	0.188541	-2.52617	0.0115315	0.0412034
EML2	808.748	-0.476083	0.125966	-3.77946	0.000157171	0.000955094
EIF3K	2686.83	-0.47565	0.0925621	-5.13871	2.76624e-07	2.74653e-06
IFT88	217.524	-0.4755	0.214958	-2.21206	0.0269625	0.0832684
KIFC2	1344.2	-0.475246	0.131071	-3.62588	0.00028798	0.00165022
GOLGA7B	812.663	-0.47524	0.125552	-3.7852	0.000153585	0.000936913
ZKSCAN1	3089.28	-0.475112	0.0929581	-5.11103	3.20405e-07	3.13706e-06
MZF1	480.548	-0.474577	0.156897	-3.02477	0.00248822	0.0111335
UBE2Q2	630.587	-0.473615	0.139846	-3.3867	0.000707393	0.0036857
MTM1	804.434	-0.473087	0.126347	-3.74435	0.000180862	0.00108454
PCYT1A	2758.48	-0.47289	0.0918912	-5.14619	2.65834e-07	2.64853e-06
ANO9	558.541	-0.472352	0.147813	-3.1956	0.00139542	0.0066946
PIAS2	1145.94	-0.471815	0.117162	-4.02705	5.64812e-05	0.000378939
UBE2H	2357.37	-0.471764	0.0984307	-4.79285	1.64426e-06	1.44341e-05
TCEA2	332.656	-0.471389	0.186045	-2.53374	0.0112854	0.0404653
CPVL	431.655	-0.469393	0.164726	-2.84954	0.00437826	0.0181301
ZNF827	298.764	-0.469004	0.190406	-2.46318	0.0137712	0.0478117
LMAN1	3389.25	-0.468962	0.0892786	-5.25279	1.49812e-07	1.54701e-06
DNHD1	463.419	-0.467574	0.15553	-3.00633	0.00264422	0.0117192
CTDSP2	5736.92	-0.467433	0.0798861	-5.85124	4.87918e-09	6.06859e-08
SFI1	429.831	-0.466993	0.166139	-2.81085	0.00494108	0.0201231
MFHAS1	3048.48	-0.466905	0.0887616	-5.26021	1.43891e-07	1.49032e-06
PARVA	739.666	-0.466536	0.136994	-3.40553	0.000660354	0.00346651
IQCG	1231.37	-0.466445	0.110143	-4.23489	2.28662e-05	0.000165011
CAPN2	3713.37	-0.466438	0.0845949	-5.51379	3.51197e-08	3.95262e-07
TMTC4	566.892	-0.466344	0.148798	-3.13409	0.00172389	0.00806444
BLVRA	313.336	-0.465352	0.19158	-2.42902	0.0151395	0.0518333
EHBP1L1	1129.43	-0.465329	0.118906	-3.91343	9.09947e-05	0.000586754
COX15	808.917	-0.464158	0.12648	-3.66982	0.00024272	0.00141225
SLC39A14	2136.84	-0.46369	0.0941345	-4.92583	8.4004e-07	7.78152e-06
JAZF1	311.802	-0.463512	0.187906	-2.46673	0.0136353	0.0474114
SEMA4F	409.13	-0.463491	0.163647	-2.83227	0.00462191	0.0189979
NET1	4167.87	-0.463409	0.0954515	-4.85491	1.20442e-06	1.0894e-05
CTNS	518.304	-0.463397	0.153876	-3.0115	0.00259964	0.0115602
SCP2	2594.56	-0.463085	0.0915059	-5.06071	4.17697e-07	4.01566e-06
BACH1	2508.47	-0.463023	0.102139	-4.53328	5.80744e-06	4.66431e-05
RAB2B	563.615	-0.462523	0.148759	-3.10921	0.00187589	0.00868538
RHBDF2	1150.64	-0.461974	0.112118	-4.12041	3.78203e-05	0.000262087
LEO1	483.968	-0.461676	0.169613	-2.72193	0.00649015	0.0254595
PLCG1	2183.7	-0.46165	0.111268	-4.14899	3.33948e-05	0.000233763
FRAS1	1662.29	-0.461429	0.109165	-4.2269	2.36936e-05	0.000170483
PBXIP1	1417.61	-0.461258	0.112354	-4.1054	4.03615e-05	0.000278914
ACOX1	2824.17	-0.461075	0.0965064	-4.77766	1.77345e-06	1.54738e-05
RPS6KA1	2277.34	-0.461056	0.0956913	-4.81816	1.44886e-06	1.28543e-05
MFSD10	690.664	-0.461027	0.135265	-3.40833	0.000653614	0.00343426
RPL11	4621.86	-0.461025	0.0889178	-5.18485	2.16191e-07	2.18161e-06
IKBKB	1464.63	-0.461019	0.107537	-4.28707	1.81044e-05	0.000132868
TKFC	633.615	-0.460996	0.137397	-3.3552	0.000793071	0.00407004
MAML3	818.275	-0.460985	0.129949	-3.54744	0.000388994	0.00216606
COX7B	2195.92	-0.460908	0.0958477	-4.80876	1.51873e-06	1.3407e-05
SSH1	1591.69	-0.460656	0.105597	-4.36238	1.28654e-05	9.69732e-05
CHRM3	282.341	-0.460085	0.19422	-2.36889	0.0178416	0.0594926
ANKRD50	1319.81	-0.459776	0.110762	-4.15104	3.30974e-05	0.000232152
MT2A	513.687	-0.459091	0.156085	-2.94129	0.00326845	0.0140637
ZYX	1523.76	-0.458909	0.105769	-4.33879	1.43269e-05	0.000106916
TMEM161A	576.578	-0.458681	0.14247	-3.21949	0.00128417	0.00622312
WDR37	688.697	-0.457986	0.136294	-3.36028	0.000778637	0.00400468
UQCRC2	2561.13	-0.457688	0.0936813	-4.88559	1.03121e-06	9.39621e-06
ARHGEF18	1299.27	-0.457029	0.10785	-4.23763	2.25889e-05	0.000163283
HTATIP2	1754.77	-0.456999	0.0996615	-4.58551	4.52876e-06	3.70449e-05
TMBIM1	4113.96	-0.455835	0.0831699	-5.48077	4.23473e-08	4.71691e-07
INVS	614.682	-0.455729	0.144987	-3.14325	0.00167083	0.00784809
THAP8	251.732	-0.455595	0.201426	-2.26184	0.023707	0.0749564
HIBCH	282.791	-0.455545	0.191923	-2.37358	0.0176167	0.0588563
LYPLAL1	1116.03	-0.455505	0.116783	-3.90044	9.60181e-05	0.000615285
VPS13B	4116.5	-0.455295	0.0906345	-5.02342	5.07604e-07	4.84227e-06
DIP2B	5130.72	-0.454594	0.0840433	-5.40905	6.33588e-08	6.90591e-07
LTA4H	1696.86	-0.453447	0.0998635	-4.54067	5.60765e-06	4.52151e-05
SUFU	553.381	-0.452362	0.154797	-2.92229	0.00347466	0.0148255
FRMD4B	1296.65	-0.451748	0.1112	-4.06249	4.85517e-05	0.000329797
BAG1	839.813	-0.451333	0.125526	-3.59553	0.000323735	0.00183432
MMP24-AS1	497.376	-0.450495	0.153584	-2.93322	0.00335462	0.0143843
BBS2	644.078	-0.450423	0.140281	-3.21085	0.00132341	0.00638102
KIAA1715	1747.48	-0.449866	0.108541	-4.14467	3.40304e-05	0.000237731
NDUFA8	937.461	-0.449546	0.120769	-3.72236	0.000197369	0.00117416
PIM3	1107.12	-0.449466	0.115738	-3.88348	0.00010297	0.000654254
RNF7	1272.68	-0.449347	0.11139	-4.03398	5.48389e-05	0.000368924
ACVR1B	1102.25	-0.448727	0.120872	-3.71243	0.000205282	0.00121746
SCOC	1284.26	-0.448702	0.108082	-4.15149	3.30311e-05	0.000231781
RPS3	10228.3	-0.44868	0.0785659	-5.71088	1.12394e-08	1.34121e-07
ENTPD7	643.11	-0.44848	0.137833	-3.25379	0.00113876	0.00559692
LTBP4	1521.24	-0.448175	0.108795	-4.11945	3.79774e-05	0.00026307
PIGH	296.864	-0.448122	0.188682	-2.375	0.0175487	0.0586747
RPL7A	15693.3	-0.448019	0.0798314	-5.61206	1.99933e-08	2.31505e-07
GATM	1073.15	-0.447965	0.126467	-3.54214	0.000396888	0.00220542
SYPL1	3399.79	-0.447958	0.0881545	-5.08151	3.7444e-07	3.62806e-06
CORO1C	5637.93	-0.447711	0.0803584	-5.57142	2.52669e-08	2.88888e-07
RAP1GAP	424.031	-0.447088	0.164429	-2.71903	0.00654727	0.025637
FKBP14	339.823	-0.446786	0.178397	-2.50446	0.012264	0.0433543
LOC102724814	261.652	-0.446643	0.199565	-2.23808	0.0252158	0.0788038
TNK1	716.949	-0.446476	0.130659	-3.4171	0.000632931	0.00333878
PEX11B	515.76	-0.446275	0.157163	-2.83957	0.00451738	0.0186481
ZFP36	1301.45	-0.446222	0.117628	-3.79351	0.000148532	0.000908231
THNSL1	297.395	-0.446035	0.186126	-2.39642	0.0165563	0.0558208
PIM1	784.933	-0.445879	0.127403	-3.49975	0.00046569	0.00253954
ZSWIM5	422.669	-0.445618	0.161395	-2.76104	0.00576171	0.0230255
ANKRD65	635.727	-0.445299	0.151639	-2.93658	0.00331857	0.0142545
ACO2	1506.87	-0.444969	0.107355	-4.14483	3.40064e-05	0.00023766
CORO6	270.512	-0.444935	0.193537	-2.29897	0.0215069	0.0695012
RPL27	1173.27	-0.444668	0.11137	-3.9927	6.53256e-05	0.000432566
PIEZO2	1492.05	-0.444667	0.104936	-4.2375	2.26027e-05	0.000163314
UBXN6	1187.14	-0.44462	0.118399	-3.75528	0.000173147	0.00104298
DMXL2	1456.44	-0.444491	0.105731	-4.20398	2.62257e-05	0.000187609
TMEM185B	1824.87	-0.444157	0.0976742	-4.54733	5.43311e-06	4.39225e-05
ERAP1	1305.63	-0.44396	0.115366	-3.84829	0.000118944	0.000744519
CAMK1D	1895.89	-0.443845	0.107424	-4.1317	3.60095e-05	0.000250443
IP6K2	1399.64	-0.443232	0.106278	-4.1705	3.0393e-05	0.000214401
POLH	740.473	-0.443103	0.130093	-3.40605	0.000659096	0.00346095
ZNF267	1170.85	-0.44263	0.115568	-3.83006	0.000128113	0.000797002
NDUFA1	636.08	-0.44198	0.140674	-3.14188	0.00167868	0.00788067
OXSR1	1817.14	-0.44183	0.104676	-4.22095	2.43274e-05	0.000174971
AFMID	722.087	-0.440907	0.130249	-3.38511	0.0007115	0.00370126
[truncated: 3,810 more rows]
