# Supplementary material for: p63 Directs Subtype-Specific Gene Expression in HPV+ Head and Neck Squamous Cell Carcinoma
Source: Front Oncol. 2022 May 31;12:879054. doi: 10.3389/fonc.2022.879054 (PMC9192977; doi:10.3389/fonc.2022.879054)
Supplement: Supplementary file 6 [file Table_5.xlsx]

## Sheet: TCGA_104sh2
	baseMean	log2FoldChange	lfcSE	stat	pvalue	padj
TTN	1030.27	-2.89039	0.520848	-5.54941	2.87e-08	5.77e-06
GAS2L2	7.24324	-2.10751	0.608551	-3.46316	0.000533864	0.00523164
TNNT3	358.568	-2.05388	0.585911	-3.50545	0.000455844	0.00465881
HIST1H3I	0.659513	-1.82044	0.730957	-2.49049	0.0127566	0.0480586
CYP1B1	738.608	-1.77899	0.418599	-4.24986	2.14e-05	0.000539466
EBF3	128.269	-1.75651	0.344476	-5.09907	3.41e-07	3.24e-05
MTUS2	12.4101	-1.71054	0.55663	-3.07302	0.00211901	0.0135752
COX6B2	137.104	-1.6765	0.424935	-3.94532	7.97e-05	0.00136052
MMP7	600.603	-1.59926	0.427549	-3.74053	0.000183634	0.00244157
RPL3L	11.0729	-1.5989	0.635904	-2.51438	0.0119242	0.0457866
MAPK15	28.6494	-1.57507	0.405846	-3.88095	0.00010405	0.00163196
KREMEN2	879.715	-1.50012	0.438836	-3.41841	0.00062988	0.00584456
IL1R2	2834.43	-1.40047	0.575811	-2.43217	0.0150085	0.0539887
RPS27	107.878	-1.39818	0.24455	-5.71736	1.08e-08	2.81e-06
IL32	3895.56	-1.37331	0.228723	-6.00426	1.92e-09	8.52e-07
PRODH	1150.72	-1.24341	0.312865	-3.97427	7.06e-05	0.00124941
ICAM2	277.491	-1.2414	0.255939	-4.85036	1.23e-06	7.76e-05
DUSP4	280.954	-1.21326	0.284089	-4.2707	1.95e-05	0.000508827
DOK7	61.2753	-1.17843	0.451325	-2.61104	0.0090268	0.0375383
ZNF239	48.6453	-1.17833	0.269775	-4.36783	1.25e-05	0.000381018
CCDC78	42.4516	-1.17412	0.360816	-3.25407	0.00113763	0.00877511
KLHL30	19.1461	-1.15092	0.487027	-2.36315	0.0181201	0.0618222
RPL39	553.693	-1.13336	0.261022	-4.34201	1.41e-05	0.000411544
DHDH	36.6324	-1.12942	0.290489	-3.88799	0.000101079	0.00160171
SCARNA2	6.03972	-1.12201	0.442836	-2.5337	0.0112867	0.0439365
SLC35F3	19.9363	-1.12058	0.505756	-2.21565	0.0267155	0.0821032
TCP10L	7.98021	-1.09764	0.279792	-3.92306	8.74e-05	0.00144091
SNCG	425.346	-1.08619	0.389031	-2.79205	0.00523756	0.0255356
LPAL2	4.95481	-1.07032	0.354365	-3.0204	0.00252438	0.0153667
RMRP	26.1213	-1.06115	0.433229	-2.44939	0.0143099	0.0522157
COL9A2	729.463	-1.03482	0.338112	-3.06057	0.00220917	0.0139944
CYP2E1	269.126	-1.00888	0.416634	-2.42149	0.015457	0.0551798
RELB	1571.51	-1.00093	0.244923	-4.08672	4.38e-05	0.000887381
SERPINF1	3538.05	-0.995585	0.335979	-2.96324	0.00304423	0.0175136
MYEF2	61.8461	-0.983988	0.412579	-2.38497	0.0170806	0.0593886
SNHG8	511.936	-0.969432	0.201818	-4.80348	1.56e-06	9.03e-05
KBTBD11	69.1926	-0.967081	0.329894	-2.93149	0.00337341	0.0187169
SOCS1	469.664	-0.964477	0.290857	-3.31598	0.000913215	0.00757638
SYTL3	279.266	-0.959041	0.26095	-3.67519	0.000237673	0.0029564
NOXO1	110.838	-0.951145	0.443715	-2.1436	0.0320652	0.093513
ATP5I	1747.15	-0.949951	0.201164	-4.72228	2.33e-06	0.000120115
CYB5A	756.309	-0.94431	0.316687	-2.98184	0.0028652	0.0167785
ADAM11	12.883	-0.93777	0.299969	-3.12623	0.00177066	0.0119797
RHBDL1	67.8543	-0.934733	0.30448	-3.06993	0.0021411	0.0136975
RPS29	5807.74	-0.932802	0.212289	-4.39402	1.11e-05	0.000356675
CD1D	29.5825	-0.914365	0.258848	-3.53243	0.000411754	0.00435264
SNHG3	88.4799	-0.910281	0.268693	-3.38781	0.000704523	0.00634139
GGT1	294.251	-0.904945	0.317112	-2.85371	0.00432122	0.0223308
MCOLN2	79.1687	-0.900366	0.257021	-3.50309	0.000459895	0.00468714
CHKA	322.114	-0.894814	0.202014	-4.42947	9.45e-06	0.000315926
YPEL1	226.628	-0.885472	0.258419	-3.4265	0.000611407	0.00572406
RHOBTB2	562.968	-0.885105	0.23167	-3.82054	0.000133161	0.00196241
ANO9	493.195	-0.883089	0.228194	-3.86991	0.000108876	0.00169173
MMP28	1377.29	-0.880373	0.398972	-2.2066	0.0273419	0.0835519
RASGRF1	19.7292	-0.873943	0.327436	-2.66905	0.00760655	0.03323
BATF3	52.033	-0.873797	0.217002	-4.02668	5.66e-05	0.0010508
ALDH2	4157.64	-0.862901	0.262137	-3.2918	0.000995491	0.00804067
PYCARD	1139.28	-0.857103	0.216727	-3.95476	7.66e-05	0.0013239
OLFM1	1845.4	-0.856419	0.400734	-2.13713	0.0325875	0.0945443
TRAPPC6A	335.769	-0.853836	0.201376	-4.24002	2.24e-05	0.00055673
CLYBL	70.3386	-0.85101	0.184116	-4.62214	3.8e-06	0.000167666
RPS26	706.774	-0.849247	0.164784	-5.15371	2.55e-07	2.59e-05
TSTD1	622.373	-0.84877	0.181538	-4.67543	2.93e-06	0.000141244
RPS19	21997.7	-0.848579	0.190111	-4.46359	8.06e-06	0.000280978
RPL34	6729.33	-0.842287	0.160808	-5.23783	1.62e-07	1.89e-05
MIR17HG	35.9517	-0.834254	0.291518	-2.86175	0.00421302	0.0219573
PTP4A3	745.794	-0.832771	0.253729	-3.28213	0.00103026	0.00822511
C19orf38	45.1004	-0.830331	0.218745	-3.79588	0.000147121	0.00211068
RPL36	9134.41	-0.82975	0.198546	-4.17914	2.93e-05	0.000669067
FKBP11	627.674	-0.826333	0.199328	-4.14558	3.39e-05	0.000743377
CXCL2	122.656	-0.826031	0.38015	-2.17291	0.0297871	0.0887609
HIST2H2AC	13.2638	-0.820778	0.257961	-3.1818	0.00146365	0.0104339
RPS24	15660.1	-0.817555	0.179584	-4.55249	5.3e-06	0.00020904
SERPINF2	215.051	-0.816623	0.283338	-2.88216	0.00394963	0.0209417
TOMM7	1424.53	-0.816169	0.168658	-4.8392	1.3e-06	8.05e-05
ANG	96.6317	-0.814467	0.212082	-3.84034	0.000122864	0.00185255
NME3	452.326	-0.814237	0.192791	-4.22342	2.41e-05	0.000585403
RPS21	8139.06	-0.813111	0.211248	-3.84908	0.000118564	0.00180405
RPL31	10539.3	-0.812748	0.166206	-4.89001	1.01e-06	6.75e-05
KLHL31	20.3792	-0.791187	0.340824	-2.32139	0.0202656	0.0670099
HAUS7	486.855	-0.790331	0.208488	-3.79077	0.00015018	0.00212793
SNHG5	1526.63	-0.788318	0.223318	-3.53002	0.000415523	0.00438103
RPL37A	13273.5	-0.787919	0.184594	-4.26839	1.97e-05	0.000509133
RPL32	11786.2	-0.786066	0.183737	-4.27822	1.88e-05	0.000496286
NDUFA1	1674.25	-0.782544	0.190995	-4.0972	4.18e-05	0.000861477
RPS27A	4857.88	-0.780549	0.164186	-4.75405	1.99e-06	0.000108474
PDRG1	705.43	-0.779024	0.17984	-4.33177	1.48e-05	0.000423094
MPP3	81.8831	-0.77661	0.235808	-3.2934	0.000989837	0.00802242
MAMDC4	176.085	-0.775764	0.33076	-2.3454	0.0190068	0.0640253
ARHGAP22	144.602	-0.773702	0.19895	-3.88893	0.000100687	0.00159835
RPL26	7272.79	-0.772392	0.167363	-4.61507	3.93e-06	0.000171655
HMSD	62.2554	-0.770907	0.362933	-2.1241	0.0336614	0.0967976
C7orf41	545.496	-0.770869	0.278888	-2.76409	0.00570826	0.0272059
RPS9	15209	-0.769368	0.161992	-4.74941	2.04e-06	0.000110603
LGALS1	4665.43	-0.766139	0.236466	-3.23995	0.0011955	0.00908587
SLC12A7	2263.49	-0.765586	0.297923	-2.56975	0.0101773	0.0407961
PIM2	1145.85	-0.760776	0.257974	-2.94904	0.0031876	0.0180775
RPS10	3131.84	-0.753146	0.191297	-3.93705	8.25e-05	0.00140039
CYGB	326.407	-0.751107	0.29489	-2.54707	0.010863	0.042787
RPS6	27787.1	-0.747638	0.183856	-4.06643	4.77e-05	0.000939167
KCNN4	263.68	-0.746841	0.244055	-3.06013	0.00221238	0.0139973
RPL27A	7622.84	-0.743434	0.169551	-4.38472	1.16e-05	0.000367128
RPL23A	2200.21	-0.740866	0.156613	-4.73055	2.24e-06	0.000115973
LAPTM5	4252.78	-0.731372	0.245532	-2.97872	0.00289457	0.0168881
RABAC1	1341.85	-0.727158	0.151514	-4.79929	1.59e-06	9.15e-05
RPS20	15443.4	-0.723725	0.179219	-4.03821	5.39e-05	0.00101701
ABLIM2	408.603	-0.722605	0.301012	-2.40058	0.016369	0.0575172
C9orf96	4.84338	-0.718858	0.261546	-2.74849	0.00598701	0.028118
RPL13A	10521.6	-0.71833	0.169453	-4.23912	2.24e-05	0.00055673
LPXN	427.187	-0.716991	0.234037	-3.06359	0.00218701	0.0138894
RPLP2	11205.9	-0.716662	0.175088	-4.09315	4.26e-05	0.000871806
RPS11	20311.1	-0.715732	0.164954	-4.33897	1.43e-05	0.000414645
ZNF692	425.652	-0.714356	0.180245	-3.96324	7.39e-05	0.00128621
CCDC88B	601.867	-0.712025	0.249891	-2.84934	0.004381	0.0225444
PCBD1	699.273	-0.711289	0.142512	-4.99107	6e-07	4.83e-05
FHAD1	41.7844	-0.711133	0.256551	-2.77189	0.00557317	0.026682
CYBA	2321.33	-0.710877	0.199863	-3.55681	0.000375381	0.00411393
LOC100130872	19.7478	-0.709779	0.272704	-2.60275	0.00924799	0.038151
RPL41	18491.3	-0.709091	0.164354	-4.31442	1.6e-05	0.000448108
CUEDC2	909.205	-0.700064	0.144254	-4.853	1.22e-06	7.73e-05
RAB26	74.355	-0.697439	0.314387	-2.21841	0.0265268	0.081784
C8orf59	599.687	-0.693692	0.15882	-4.36778	1.26e-05	0.000381018
SP6	239.812	-0.691071	0.252428	-2.73769	0.00618717	0.0287194
CAMK1G	7.99221	-0.689769	0.29913	-2.30592	0.0211153	0.0691584
RPLP1	24791.8	-0.683267	0.173223	-3.94443	8e-05	0.00136431
CD83	582.773	-0.681061	0.219599	-3.10139	0.00192615	0.012658
COMMD6	997.309	-0.680674	0.142113	-4.78968	1.67e-06	9.37e-05
RPS3A	4318.67	-0.679715	0.164295	-4.13717	3.52e-05	0.000762041
MACROD1	273.988	-0.678111	0.206142	-3.28954	0.00100353	0.00807926
RPL17	2205.06	-0.67349	0.170113	-3.95906	7.52e-05	0.00130275
ST3GAL5	227.946	-0.673303	0.244153	-2.75771	0.00582076	0.0275762
GRAP	140.811	-0.672202	0.247461	-2.71639	0.00659979	0.0300415
COX6C	2420.2	-0.668919	0.182887	-3.65756	0.000254623	0.00312066
PHLDA3	2134.2	-0.665442	0.18281	-3.64007	0.000272561	0.00327027
NUDT1	841.192	-0.662623	0.178416	-3.71391	0.000204078	0.00262765
RPS25	3904.29	-0.662435	0.170419	-3.8871	0.000101448	0.00160349
MRPL23	964.561	-0.662412	0.162608	-4.07367	4.63e-05	0.000920285
MMP25	106.526	-0.659899	0.242127	-2.72543	0.00642185	0.0294878
STAB1	901.58	-0.657762	0.209076	-3.14605	0.00165493	0.0113979
RPL8	37997.8	-0.656843	0.196542	-3.342	0.000831779	0.00711318
RPL13	14312.7	-0.656664	0.178813	-3.67234	0.000240335	0.00297935
PTTG1	2154.12	-0.655804	0.192651	-3.4041	0.000663822	0.00606721
ZNF22	548.315	-0.654978	0.158223	-4.13959	3.48e-05	0.000756721
RPS4X	22734.2	-0.653722	0.199813	-3.27167	0.00106915	0.00845314
CTU1	83.6154	-0.650292	0.181991	-3.5732	0.000352639	0.00393017
CD40	850.902	-0.649036	0.211847	-3.06371	0.00218611	0.0138885
COQ10A	151.965	-0.648327	0.153905	-4.21251	2.53e-05	0.000603429
ECHDC2	593.565	-0.645011	0.183974	-3.506	0.000454899	0.00465175
GADD45A	1278.04	-0.643449	0.212297	-3.03089	0.00243833	0.0149721
TNFRSF25	316.464	-0.64249	0.21906	-2.93294	0.00335769	0.0186735
ARID5A	619.705	-0.642219	0.160795	-3.99402	6.5e-05	0.00117698
RPL30	13672.2	-0.641989	0.167481	-3.83321	0.000126483	0.0018962
MRPL53	613.311	-0.640432	0.144594	-4.42917	9.46e-06	0.000315926
FAH	375.596	-0.637073	0.169673	-3.75471	0.000173541	0.0023657
FRMD4A	729.959	-0.636725	0.266907	-2.38557	0.0170526	0.0593393
GLTSCR2	5413.54	-0.63615	0.169943	-3.74332	0.000181607	0.00242011
IFI27L2	698.964	-0.635239	0.23452	-2.70868	0.00675524	0.0305156
RPS8	16566.1	-0.632723	0.165471	-3.82376	0.00013143	0.0019465
PPAPDC1B	522.614	-0.632409	0.171887	-3.67921	0.000233955	0.00291807
SNRPD2	3570.68	-0.631136	0.151666	-4.16137	3.16e-05	0.000709944
NDUFA4	2196.23	-0.627915	0.136174	-4.61113	4e-06	0.000173155
RPL10	9130.28	-0.626116	0.174999	-3.57782	0.00034647	0.00389487
MRPS25	897.509	-0.62501	0.163936	-3.81251	0.000137561	0.00199698
C9orf123	730.914	-0.62295	0.163287	-3.81507	0.000136145	0.00198901
RPL38	5416.39	-0.620563	0.18994	-3.26716	0.00108633	0.00853016
SERGEF	241.732	-0.61949	0.124943	-4.95817	7.12e-07	5.36e-05
BLVRA	1050.37	-0.618788	0.151086	-4.0956	4.21e-05	0.000863999
CCS	547.576	-0.616265	0.158084	-3.89833	9.69e-05	0.00155511
CTSF	851.082	-0.612005	0.223659	-2.73633	0.00621293	0.028797
C1orf63	612.853	-0.609402	0.214041	-2.84714	0.00441146	0.0226376
STAT5A	1240.51	-0.608226	0.156558	-3.88498	0.00010234	0.00161203
RPS13	5729.65	-0.603389	0.145072	-4.15923	3.19e-05	0.000713983
EDEM2	766.052	-0.60208	0.15836	-3.80198	0.000143544	0.00206746
IFITM2	1247.88	-0.600626	0.212765	-2.82296	0.00475826	0.0238238
RPL28	17602.5	-0.600116	0.170845	-3.51263	0.000443692	0.00456259
RPL11	15813.6	-0.599133	0.154619	-3.87489	0.000106673	0.00166554
CDK18	878.396	-0.595448	0.21882	-2.72117	0.00650509	0.0297434
MRPS26	1011.16	-0.593481	0.180483	-3.28829	0.00100798	0.00809876
POLR2L	1623.29	-0.589659	0.159229	-3.70321	0.000212888	0.00270686
USMG5	800.964	-0.589585	0.178014	-3.31201	0.000926275	0.00766393
MFSD3	247.164	-0.588412	0.206313	-2.85204	0.00434402	0.022417
KRTCAP3	482.322	-0.584821	0.206801	-2.82794	0.00468486	0.0236045
LOC550643	321.887	-0.584011	0.172432	-3.38691	0.000706847	0.00635575
HIGD2A	1297.78	-0.582713	0.160867	-3.62233	0.000291966	0.00344256
TMSB10	20757.6	-0.58086	0.172027	-3.37656	0.000733988	0.00652335
ZNF581	423.83	-0.580813	0.149761	-3.87826	0.000105204	0.00164583
BTN3A1	767.509	-0.579969	0.218155	-2.65852	0.00784841	0.0339709
PLEKHF1	423.286	-0.576753	0.248445	-2.32145	0.0202625	0.0670099
SCARNA12	5.00966	-0.575926	0.267609	-2.15211	0.0313883	0.0920513
TIMM17B	1041.99	-0.575496	0.159506	-3.60798	0.000308592	0.00358973
RPS7	3226.62	-0.573268	0.153496	-3.73474	0.000187909	0.00248612
AHSA2	261.693	-0.572487	0.21426	-2.67192	0.00754179	0.03301
CDC42EP5	106.055	-0.572145	0.242327	-2.36105	0.0182235	0.0620632
RPS2	8061.89	-0.571765	0.167614	-3.4112	0.000646787	0.00595323
ZFYVE28	103.16	-0.570646	0.20517	-2.78134	0.00541358	0.0261825
RPL23	10070.9	-0.570005	0.155957	-3.65488	0.000257302	0.00314718
UBE2S	872.884	-0.566943	0.184117	-3.07926	0.00207514	0.0133595
NDUFS6	1766.36	-0.563741	0.184456	-3.05623	0.00224136	0.0141371
RPS14	13615.8	-0.559819	0.167357	-3.34505	0.000822665	0.00707484
LOC388796	516.857	-0.559582	0.208588	-2.68271	0.00730273	0.0322098
SCRN2	555.556	-0.555714	0.161875	-3.43297	0.000597002	0.00562778
RPL18	16686.8	-0.554627	0.165446	-3.35232	0.00080137	0.00694831
SLC5A6	863.159	-0.549327	0.164305	-3.34333	0.000827793	0.00709896
RPS18	14858.8	-0.546652	0.179178	-3.05089	0.00228168	0.0143024
RPL14	5517.42	-0.543589	0.180706	-3.00814	0.00262848	0.0158166
RPS3	20225.5	-0.542055	0.1796	-3.01812	0.00254347	0.015447
TMEM219	1418.08	-0.539155	0.123749	-4.35683	1.32e-05	0.000390865
WDR54	310.403	-0.536341	0.217761	-2.46298	0.0137787	0.0507802
ABCA2	1245.21	-0.536072	0.222495	-2.40936	0.0159805	0.0564553
DHRS7	878.457	-0.535714	0.190065	-2.81859	0.00482353	0.0240455
PSMG3	985.645	-0.535484	0.17296	-3.096	0.0019615	0.0128216
PPIH	636.162	-0.535469	0.137888	-3.88336	0.000103021	0.00161998
C19orf48	2252.35	-0.534566	0.170095	-3.14274	0.00167373	0.0114892
H2AFX	1781.6	-0.532885	0.175907	-3.02936	0.00245073	0.0150202
RPL36AL	2972.69	-0.531512	0.139374	-3.81357	0.000136974	0.0019934
TUSC1	552.624	-0.530857	0.178085	-2.98091	0.00287389	0.0168133
C7orf26	549.995	-0.529121	0.0996723	-5.30861	1.1e-07	1.43e-05
RBM6	1014.04	-0.528345	0.130374	-4.05254	5.07e-05	0.00097169
SNHG1	1089.37	-0.526676	0.196341	-2.68246	0.00730822	0.0322184
MAN2C1	747.382	-0.524574	0.11715	-4.47781	7.54e-06	0.000267814
RPL29	8017.34	-0.52418	0.193319	-2.71148	0.00669834	0.0303845
RPL12	5867.92	-0.522805	0.151181	-3.45813	0.000543935	0.00528513
CRYZ	558.933	-0.522568	0.192625	-2.71287	0.00667023	0.0302956
RPL5	14685.4	-0.519438	0.144044	-3.6061	0.000310831	0.00360373
ATG16L2	297.098	-0.518177	0.202211	-2.56256	0.0103905	0.0413915
LSM7	881.288	-0.517905	0.188567	-2.74653	0.00602289	0.0282034
GRTP1	373.629	-0.515556	0.172212	-2.99373	0.00275589	0.0163607
ITGB3BP	322.313	-0.513659	0.138102	-3.71941	0.000199692	0.00258936
RPL37	12549.8	-0.513	0.191516	-2.67863	0.00739243	0.0324803
SULT1A1	160.704	-0.512102	0.237298	-2.15805	0.0309237	0.0911114
RPL15	13122.8	-0.510999	0.1549	-3.2989	0.000970654	0.00792678
RPS15	5292.23	-0.510546	0.185481	-2.75256	0.00591319	0.0279069
N6AMT2	91.0674	-0.510452	0.135819	-3.75834	0.000171048	0.00234567
ARHGAP25	405.347	-0.507249	0.232883	-2.17813	0.0293962	0.0879392
C19orf10	1508.58	-0.505603	0.141399	-3.57572	0.000349259	0.00391548
RBM38	1447.58	-0.505373	0.162237	-3.11503	0.00183927	0.0122942
CRIP2	1887.37	-0.505224	0.213441	-2.36705	0.0179307	0.0613587
RPL4	19519.9	-0.504519	0.150822	-3.34512	0.000822474	0.00707484
NDUFS5	2570.66	-0.503922	0.154477	-3.26212	0.00110582	0.00863364
EXOSC4	630.821	-0.501341	0.201514	-2.48788	0.0128509	0.0483325
ATP5G1	1347.2	-0.499683	0.175463	-2.8478	0.00440227	0.0225968
ELMO1	278.179	-0.497429	0.224493	-2.21579	0.0267061	0.0820882
RPL19	15895.4	-0.496998	0.133774	-3.71522	0.000203029	0.0026215
C9orf3	1791.57	-0.496868	0.19493	-2.54895	0.0108046	0.0426211
NLRP3	61.6042	-0.496652	0.232458	-2.13653	0.0326365	0.0946071
DUSP5	1228.5	-0.494769	0.230503	-2.14647	0.0318351	0.0930343
RPL35	10852	-0.494114	0.188513	-2.62111	0.00876442	0.0367556
ZNRD1	449.572	-0.493903	0.12651	-3.90407	9.46e-05	0.00152528
CST3	3962.46	-0.493373	0.15482	-3.18675	0.00143882	0.01032
ZNF593	480.287	-0.49276	0.172751	-2.85243	0.00433869	0.0224084
COX6B1	3675.39	-0.492006	0.153453	-3.20624	0.00134482	0.00985201
RPL27	10870.8	-0.491619	0.147095	-3.34218	0.000831246	0.00711206
COX7C	3099.84	-0.491303	0.149876	-3.27806	0.00104522	0.00830531
DGKD	551.277	-0.490098	0.192698	-2.54334	0.0109797	0.0431355
ZNF251	289.226	-0.489937	0.174256	-2.81159	0.00492977	0.0244158
MRPS21	1078.27	-0.489921	0.161228	-3.03868	0.00237616	0.0147185
SMYD3	188.898	-0.488939	0.18216	-2.68411	0.00727221	0.0321447
PPM1J	111.83	-0.487755	0.181289	-2.69049	0.00713476	0.0317052
BIN3	569.186	-0.487523	0.131364	-3.71123	0.000206255	0.00264824
RPL10A	8713.85	-0.484744	0.136298	-3.55649	0.000375836	0.004114
WDR13	1461.09	-0.484086	0.140059	-3.45631	0.000547629	0.00531488
C9orf72	337.56	-0.481852	0.16037	-3.00463	0.00265903	0.0159325
NPM3	549.253	-0.481551	0.210754	-2.2849	0.0223185	0.0718922
RRAS	876.892	-0.479871	0.188761	-2.54222	0.0110151	0.0432147
ZP3	287.046	-0.478281	0.202825	-2.35809	0.0183691	0.0623468
RPS15A	9740.39	-0.477391	0.159927	-2.98506	0.00283523	0.016663
HKR1	396.922	-0.472432	0.159222	-2.96713	0.00300592	0.0173586
KLHDC4	305.626	-0.471772	0.146936	-3.21073	0.00132398	0.00977263
MANF	1213.63	-0.469933	0.143274	-3.27995	0.00103826	0.00827426
PRR3	226.844	-0.469269	0.143159	-3.27797	0.00104556	0.00830531
GPX1	4947.7	-0.465494	0.169222	-2.75079	0.00594516	0.0280214
TOP1MT	680.791	-0.464173	0.202387	-2.29349	0.0218196	0.07077
RPL22	5870.22	-0.463946	0.137588	-3.372	0.000746252	0.00661311
ATAD3B	503.212	-0.46365	0.174209	-2.66145	0.00778048	0.0337571
QPCTL	252.788	-0.459595	0.154999	-2.96516	0.00302528	0.0174416
SLC29A2	297.345	-0.459424	0.199369	-2.3044	0.0212005	0.0693507
TMEM18	540.3	-0.45921	0.117202	-3.91809	8.93e-05	0.0014555
C2CD2	915.436	-0.456066	0.212386	-2.14734	0.0317661	0.0929065
CRELD1	361.273	-0.453853	0.148685	-3.05245	0.00226982	0.0142525
SNRNP70	3740.45	-0.453716	0.124475	-3.64502	0.00026737	0.0032294
POLR3GL	377.952	-0.453444	0.117658	-3.85391	0.000116246	0.00178078
RPS5	12453.9	-0.452008	0.170562	-2.65011	0.00804651	0.03465
POLE4	749.581	-0.451832	0.159955	-2.82475	0.00473181	0.0237562
CAPG	5150.69	-0.451323	0.151203	-2.98488	0.00283691	0.016663
PPIB	7549.29	-0.449065	0.131221	-3.42221	0.000621144	0.00579281
DGAT1	792.403	-0.448133	0.122907	-3.64612	0.000266227	0.00322278
RASA4	194.504	-0.446712	0.192807	-2.31688	0.02051	0.0675865
RPS23	11303.5	-0.446696	0.164514	-2.71525	0.00662259	0.0301303
NDUFC1	740.882	-0.445661	0.136917	-3.25496	0.00113408	0.00875877
RPL6	6118.34	-0.444747	0.133329	-3.33571	0.000850819	0.0072456
ANAPC11	1611.91	-0.444588	0.179028	-2.48335	0.0130155	0.0486324
PRDX4	1652.4	-0.444151	0.170548	-2.60426	0.00920732	0.0380434
LENG9	236.045	-0.441953	0.165487	-2.67062	0.00757119	0.033107
EEF1G	12808.2	-0.441733	0.155202	-2.84619	0.00442463	0.0226925
ISCU	1410.37	-0.441558	0.119165	-3.70542	0.000211038	0.00268719
ALDH1B1	644.385	-0.441238	0.195792	-2.25361	0.024221	0.0763833
SERF2	7234.04	-0.440849	0.156436	-2.81808	0.00483118	0.0240706
NAT9	437.786	-0.438809	0.136303	-3.21936	0.00128477	0.00956406
SYNGR2	6523	-0.437736	0.161356	-2.71286	0.00667048	0.0302956
EIF2S2	2394.93	-0.437109	0.153659	-2.84467	0.0044457	0.0227749
DDX26B	242.427	-0.435445	0.193831	-2.24652	0.0246706	0.0773673
ALKBH2	424.387	-0.433634	0.14575	-2.9752	0.00292801	0.0170105
SLC25A26	346.107	-0.433224	0.128711	-3.36587	0.000763035	0.00671639
C11orf31	1111.78	-0.43251	0.147046	-2.94131	0.00326822	0.0183756
NEDD8	2095.45	-0.431951	0.13458	-3.20963	0.00132908	0.00979841
EIF3F	2135.33	-0.431168	0.114474	-3.76652	0.000165539	0.00228723
WDR83	220.031	-0.431137	0.1299	-3.319	0.000903411	0.00752776
TRAF4	1896.43	-0.430802	0.139425	-3.08985	0.00200255	0.0130063
IAH1	477.753	-0.429988	0.125064	-3.43813	0.000585746	0.00556171
EEF1B2	2810.92	-0.429132	0.139247	-3.08182	0.00205742	0.0132827
TMEM70	567.329	-0.427191	0.137944	-3.09685	0.00195591	0.0128005
VPS28	1925.26	-0.426084	0.136904	-3.11228	0.00185651	0.0123689
DDX51	520.398	-0.42595	0.120114	-3.54621	0.000390822	0.00420523
GATS	192.624	-0.425362	0.195426	-2.17659	0.0295111	0.0881866
JAGN1	761.097	-0.422733	0.124429	-3.39737	0.000680362	0.00617241
NDUFS4	779.385	-0.42255	0.160281	-2.63632	0.00838112	0.0356373
PLEKHO2	932.904	-0.421962	0.165767	-2.54552	0.0109116	0.0429229
ATF4	6554.59	-0.420755	0.113462	-3.70834	0.00020862	0.00267023
PRSS16	281.367	-0.420701	0.165265	-2.54562	0.0109085	0.0429229
SF3B5	1753.51	-0.420446	0.143684	-2.92619	0.00343145	0.0189448
FBL	4782.21	-0.419534	0.173699	-2.41529	0.0157226	0.0557804
ILK	1772.83	-0.419451	0.118882	-3.52831	0.000418228	0.00439691
MAGOH	787.8	-0.417133	0.124694	-3.34526	0.000822048	0.00707484
DTD1	812.763	-0.416638	0.191021	-2.18111	0.0291751	0.0874584
RPL18A	1003.65	-0.415927	0.189502	-2.19484	0.0281753	0.0854579
PMVK	1472.38	-0.414673	0.16264	-2.54963	0.0107836	0.0425474
ATP5G2	4397.5	-0.414642	0.120079	-3.45307	0.000554243	0.00534676
SERTAD1	738.763	-0.41451	0.157158	-2.63754	0.00835086	0.0355333
ZFYVE27	550.074	-0.414334	0.116525	-3.55576	0.000376887	0.00411813
SHFM1	2372.69	-0.41382	0.177905	-2.32607	0.0200148	0.0664441
GAR1	462.285	-0.409343	0.129539	-3.16	0.00157769	0.011024
KCTD6	137.119	-0.407987	0.17709	-2.30385	0.0212313	0.0693911
AKR1A1	3171	-0.403654	0.132972	-3.03564	0.00240026	0.0148078
POMGNT1	1537.54	-0.402942	0.0977787	-4.12096	3.77e-05	0.000801979
COMMD5	619.859	-0.402534	0.10735	-3.74972	0.00017703	0.00238665
EIF3K	4333.18	-0.402301	0.147467	-2.72807	0.00637065	0.0293187
RPL35A	14085.6	-0.402107	0.16342	-2.46057	0.0138716	0.0510818
NR2C2AP	792.871	-0.402047	0.152722	-2.63254	0.00847495	0.0359279
IDI2	56.1084	-0.401892	0.158442	-2.53652	0.0111961	0.0436675
DGUOK	795.811	-0.401423	0.114386	-3.50937	0.000449172	0.0046086
RPL3	27984.4	-0.401376	0.136736	-2.9354	0.00333114	0.0185812
CSRP1	3838.17	-0.399951	0.117529	-3.40301	0.000666489	0.0060857
TARSL2	240.322	-0.398314	0.14526	-2.74207	0.00610528	0.0284908
IMP3	1487.91	-0.397064	0.120645	-3.29118	0.000997695	0.00804784
DNASE2	1721.06	-0.396519	0.125587	-3.15733	0.00159221	0.0110752
GNB2L1	24700.9	-0.396347	0.143324	-2.7654	0.00568538	0.0271109
CDC37L1	376.858	-0.396082	0.16255	-2.43667	0.0148231	0.0534479
LRPAP1	2281.02	-0.395758	0.127375	-3.10703	0.00188977	0.0124861
RPL7A	10332.5	-0.395734	0.159695	-2.47806	0.0132099	0.0491684
GET4	908.924	-0.394733	0.13165	-2.99835	0.00271446	0.0161852
B3GALT6	752.56	-0.394674	0.131946	-2.99118	0.00277904	0.0164579
NSMCE1	865.193	-0.39451	0.134244	-2.93876	0.00329527	0.018471
JMJD4	551.244	-0.393331	0.118247	-3.32634	0.000879954	0.00739073
HMGN4	1443.58	-0.391251	0.0941065	-4.15753	3.22e-05	0.000717417
DAD1	2199.55	-0.3888	0.121226	-3.20723	0.0013402	0.00984872
TNIP2	983.332	-0.387677	0.133676	-2.90013	0.00373008	0.0200325
PEMT	315.647	-0.386256	0.151964	-2.54176	0.0110296	0.0432313
PRDX5	4804.28	-0.385615	0.166669	-2.31366	0.0206862	0.0680446
B3GNT1	321.867	-0.383533	0.147766	-2.59554	0.00944414	0.0386795
LOC285074	226.819	-0.382301	0.127107	-3.00771	0.00263221	0.0158266
RAB11FIP3	611.129	-0.381847	0.176005	-2.16952	0.0300429	0.0893055
APBB3	210.71	-0.378575	0.172809	-2.19072	0.0284724	0.0861028
ALG5	443.636	-0.377184	0.12432	-3.03398	0.00241348	0.0148639
MGC16275	32.2166	-0.374199	0.147647	-2.53442	0.0112634	0.0438741
TPT1	37261.8	-0.374146	0.140723	-2.65874	0.00784344	0.0339654
MRPL20	1276.05	-0.37357	0.137302	-2.72079	0.00651257	0.0297584
ACAD8	325.377	-0.372838	0.120467	-3.09493	0.00196862	0.0128359
SLC25A33	165.211	-0.372711	0.167157	-2.2297	0.0257672	0.0798987
ADPGK	1137.89	-0.371907	0.0918038	-4.05111	5.1e-05	0.000974598
NGDN	617.041	-0.370965	0.111485	-3.32747	0.00087638	0.00737422
BRF2	392.689	-0.370794	0.114201	-3.24685	0.00116692	0.00892965
DDRGK1	953.619	-0.370061	0.153626	-2.40885	0.0160028	0.0565114
TP53TG1	317.118	-0.369767	0.170971	-2.16275	0.0305607	0.0904051
FDXACB1	61.2662	-0.369224	0.127973	-2.88516	0.00391213	0.020785
ULK3	913.005	-0.368658	0.134483	-2.74129	0.00611981	0.028525
CRYL1	258.372	-0.368307	0.172048	-2.14072	0.0322963	0.0939476
ATP6V0B	2617.83	-0.366826	0.124049	-2.9571	0.00310545	0.0177268
HRAS	1406.79	-0.366523	0.159231	-2.30184	0.0213444	0.0696843
MFSD10	1422.6	-0.365958	0.14709	-2.48799	0.0128468	0.0483305
CENPH	641.205	-0.365419	0.161827	-2.25809	0.0239404	0.0757298
SH2B1	988.067	-0.363238	0.122608	-2.96259	0.00305062	0.0175449
CDK10	705.443	-0.363192	0.168597	-2.1542	0.0312242	0.0917167
BCAT2	1135.07	-0.362048	0.148165	-2.44355	0.0145435	0.0527847
RBMX2	473.654	-0.361685	0.125985	-2.87087	0.00409344	0.0214867
COX6A1	2364.86	-0.360928	0.162429	-2.22206	0.0262793	0.0812669
ZBTB49	89.0994	-0.356593	0.108719	-3.27997	0.00103819	0.00827426
RHOT2	1727.45	-0.355246	0.117936	-3.01219	0.00259369	0.0156432
RPL24	6808.16	-0.354802	0.160759	-2.20704	0.0273113	0.0834728
MGST2	939.512	-0.354609	0.148879	-2.38186	0.0172253	0.0596972
RSL24D1	1574.05	-0.35457	0.119365	-2.97046	0.00297353	0.0172149
RABGGTB	753.224	-0.35453	0.126802	-2.79594	0.0051749	0.0253289
AKAP8L	948.327	-0.353374	0.108288	-3.26329	0.00110126	0.00860683
ATXN7L2	138.76	-0.353068	0.125448	-2.81446	0.00488593	0.0242642
NDUFV1	3193.67	-0.352917	0.165435	-2.13327	0.0329024	0.0951522
COX7A2	1951.39	-0.35255	0.144503	-2.43974	0.014698	0.0531745
ZNHIT1	1138.98	-0.351051	0.156642	-2.24111	0.0250192	0.0781478
CARS	1406.04	-0.351023	0.144809	-2.42404	0.0153488	0.0549398
ANAPC4	470.932	-0.348006	0.103961	-3.34748	0.000815498	0.007033
MMAB	786.004	-0.347586	0.148179	-2.34571	0.0189908	0.0639833
ATP5O	3516.96	-0.347234	0.146253	-2.37419	0.0175873	0.060573
RPLP0	22069.2	-0.347164	0.156594	-2.21697	0.0266249	0.0819622
METTL5	519.47	-0.343492	0.119397	-2.8769	0.00401604	0.0211957
TMEM216	287.684	-0.340765	0.124959	-2.72702	0.00639095	0.0293809
GRHPR	1578.19	-0.340672	0.102306	-3.32995	0.000868621	0.00734941
C1orf123	433.715	-0.339374	0.0972517	-3.48965	0.000483662	0.00485915
BCS1L	395.239	-0.33933	0.125254	-2.70913	0.00674608	0.0305029
RELT	384.662	-0.338288	0.127037	-2.66291	0.00774679	0.0336581
TIMM8A	193.957	-0.338242	0.155725	-2.17205	0.0298517	0.0889103
SGSM3	1264.41	-0.338156	0.101613	-3.32788	0.000875081	0.00737152
C12orf44	1256.88	-0.337833	0.126605	-2.6684	0.00762131	0.0332582
CCDC101	403.539	-0.337562	0.147725	-2.28507	0.0223087	0.071873
DHPS	1011.14	-0.337141	0.109424	-3.08104	0.00206277	0.0133078
TARBP2	553.357	-0.33679	0.114826	-2.93304	0.00335662	0.0186735
ISOC1	618.668	-0.336678	0.136124	-2.47332	0.0133866	0.0496949
ARHGEF1	2277.04	-0.336082	0.127206	-2.64202	0.00824137	0.0352631
TOE1	325.669	-0.33555	0.0840732	-3.99117	6.57e-05	0.00118769
PTMA	21525.5	-0.334722	0.126965	-2.63634	0.00838061	0.0356373
MRPS17	308.198	-0.33405	0.15266	-2.1882	0.0286553	0.0864279
ZNF605	331.402	-0.333487	0.130291	-2.55955	0.0104807	0.0416209
CREG1	2097.1	-0.333186	0.123539	-2.69702	0.0069964	0.0312319
RBM5	1402.6	-0.330712	0.128876	-2.56612	0.0102843	0.041099
CDADC1	122.965	-0.329819	0.121771	-2.70851	0.00675856	0.0305156
SNRPB	6454	-0.326004	0.149093	-2.18658	0.0287732	0.0866835
RRP1	1321.09	-0.324605	0.141303	-2.29722	0.0216063	0.0702395
MUS81	629.791	-0.323266	0.0941891	-3.43209	0.000598938	0.00563733
PSMB4	5371.48	-0.322357	0.0967579	-3.33158	0.000863542	0.00732203
GLT8D1	673.333	-0.321688	0.121786	-2.64143	0.0082558	0.0352844
C19orf12	399.995	-0.319676	0.101849	-3.13873	0.0016968	0.0116096
ZCCHC3	597.17	-0.316831	0.106513	-2.97457	0.00293396	0.0170181
EEF1A1	56219.4	-0.313294	0.140058	-2.23689	0.0252935	0.0788245
NACA	12944	-0.312259	0.10331	-3.02254	0.00250661	0.0152881
NOD1	267.088	-0.311675	0.0974628	-3.19788	0.0013844	0.010013
CALM3	4957.59	-0.308175	0.10534	-2.92553	0.00343872	0.0189665
AGPAT6	1453.25	-0.306869	0.0971352	-3.15919	0.00158207	0.011042
SNRPB2	907.59	-0.305906	0.13289	-2.30195	0.0213378	0.0696821
TRAPPC2	249.737	-0.304894	0.124417	-2.45058	0.0142626	0.0521653
NXT1	617.408	-0.304832	0.144612	-2.10793	0.0350374	0.0996605
PRMT1	3574.84	-0.30448	0.129144	-2.35768	0.0183894	0.0623981
AK2	3297	-0.303505	0.101498	-2.99024	0.00278755	0.0164929
TRIM27	1104.29	-0.303477	0.0985885	-3.07822	0.00208243	0.0133923
PDCL3	471.863	-0.303404	0.120992	-2.50763	0.0121542	0.046446
ARFGAP1	1505.24	-0.301485	0.119212	-2.52898	0.0114394	0.0443989
ZBTB48	456.455	-0.30122	0.131202	-2.29585	0.0216846	0.0704441
POLR2F	792.989	-0.300997	0.140891	-2.13638	0.0326488	0.0946277
MAD1L1	684.578	-0.299829	0.130854	-2.29132	0.021945	0.0710257
MAGED2	2368.56	-0.298724	0.13958	-2.14017	0.0323412	0.094023
C1orf122	648.968	-0.297422	0.138632	-2.14541	0.0319202	0.0931938
SF3B14	1455.25	-0.297236	0.121528	-2.44583	0.0144519	0.0525535
HM13	3619.48	-0.296105	0.134558	-2.20058	0.0277661	0.0845105
NUPL2	429.051	-0.29602	0.0923978	-3.20375	0.00135649	0.00990325
C17orf75	289.112	-0.294719	0.128285	-2.29738	0.0215971	0.0702222
POLR1D	2140.24	-0.294444	0.123971	-2.3751	0.0175442	0.0604911
DYNC2LI1	199.291	-0.293749	0.126101	-2.32946	0.0198345	0.0660075
PACRGL	179.166	-0.291391	0.121318	-2.40188	0.0163112	0.0573677
CCDC90A	405.639	-0.288205	0.109698	-2.62726	0.00860746	0.0362953
ZNF696	196.691	-0.285103	0.126893	-2.24681	0.0246522	0.0773476
PBXIP1	2284.23	-0.284241	0.132531	-2.14472	0.0319754	0.0932956
C11orf54	247.242	-0.284167	0.126168	-2.25229	0.0243038	0.0765784
TM2D3	576.184	-0.283029	0.0962357	-2.941	0.00327154	0.018383
PPIA	5387.27	-0.279326	0.118209	-2.36299	0.0181281	0.0618265
RPUSD4	397.259	-0.278236	0.128533	-2.16472	0.0304094	0.0901157
SUMF2	2277.06	-0.278236	0.105487	-2.63762	0.00834894	0.0355333
THOC1	505.875	-0.27783	0.131301	-2.11597	0.0343472	0.0981825
MLLT6	3633.34	-0.277809	0.106864	-2.59964	0.00933212	0.0383868
LARP1B	351.277	-0.274487	0.127037	-2.16069	0.0307196	0.0907289
ZNF26	199.32	-0.270531	0.114215	-2.36861	0.0178552	0.0612259
MRPS5	1071.53	-0.269582	0.117081	-2.30253	0.0213052	0.0696062
ACBD6	551.881	-0.265606	0.10765	-2.46731	0.0136133	0.0503143
CXXC1	1331.88	-0.262817	0.112144	-2.34357	0.0191004	0.0642698
RPA2	2132.69	-0.258803	0.110753	-2.33676	0.0194514	0.0650807
PPA2	1021.19	-0.258791	0.107164	-2.41491	0.0157392	0.0558285
TBCC	572.433	-0.250446	0.10784	-2.32239	0.0202122	0.0668695
HAX1	1594.27	-0.24832	0.092368	-2.68838	0.00717993	0.0318211
OSTC	1386.7	-0.246938	0.105262	-2.34593	0.0189798	0.0639696
BRE	506.315	-0.245328	0.107879	-2.27409	0.0229605	0.0734937
PSMD9	1285.03	-0.24417	0.109158	-2.23685	0.0252961	0.0788245
MCRS1	1251.21	-0.240545	0.0818102	-2.94028	0.00327913	0.01842
AAAS	833.806	-0.236316	0.101952	-2.31791	0.0204541	0.067463
MRPL32	743.131	-0.236288	0.109702	-2.15391	0.0312469	0.0917687
CD2BP2	1679.2	-0.235779	0.106659	-2.2106	0.0270638	0.0828742
HDHD2	482.994	-0.230744	0.101826	-2.26606	0.0234477	0.0746367
UBE2G2	1277.28	-0.229361	0.105866	-2.16653	0.030271	0.0898234
PREB	1290.56	-0.227833	0.0867603	-2.626	0.0086395	0.0363974
NHP2L1	2695.96	-0.225808	0.100714	-2.24206	0.0249576	0.0780351
IKBKB	1096.78	-0.225428	0.0984928	-2.28877	0.0220925	0.0713523
CPSF3L	1913.33	-0.224236	0.10603	-2.11483	0.0344442	0.0983086
HSP90B1	16390.9	-0.21622	0.0922908	-2.34281	0.019139	0.0643437
CCDC59	520.933	-0.211702	0.100478	-2.10695	0.0351216	0.0998455
ZNF263	636.407	-0.211067	0.0822486	-2.56621	0.0102817	0.0410978
WDR73	295.502	-0.208787	0.0886587	-2.35495	0.0185254	0.0627508
ALG6	465.673	-0.208498	0.0935761	-2.22811	0.0258733	0.0801872
E2F6	384.163	-0.207037	0.0826779	-2.50414	0.012275	0.0467515
UNC50	472.799	-0.200235	0.0794566	-2.52005	0.0117337	0.0452158
ZNF2	117.301	-0.199208	0.0786185	-2.53385	0.0112816	0.0439356
PRKAG1	1097.48	-0.165577	0.0676692	-2.44686	0.0144106	0.0524502
HNRNPK	11850.2	0.129982	0.056677	2.29338	0.021826	0.0707729
CASC3	1953.97	0.137967	0.0578682	2.38415	0.0171185	0.0594559
HNRNPU	10780.3	0.14278	0.0570994	2.50056	0.0123997	0.0470506
TBC1D9B	3046.04	0.181242	0.0857894	2.11263	0.0346321	0.0987158
SF3A1	3330.7	0.188565	0.0881994	2.13794	0.032522	0.0944245
DDX46	1747.17	0.19235	0.0886391	2.17003	0.0300045	0.0892348
HECTD3	1131.11	0.198033	0.0864887	2.2897	0.0220389	0.0712477
HS2ST1	854.943	0.199984	0.0880314	2.27173	0.0231026	0.0737699
IPO9	2492.59	0.20243	0.0829977	2.43898	0.0147287	0.0532645
RAB14	3503.49	0.205736	0.0894547	2.29989	0.0214542	0.0699187
LASP1	5632.51	0.208224	0.0928362	2.24292	0.0249022	0.0779312
XPO1	4584.52	0.209461	0.0769166	2.72322	0.00646492	0.0296336
KIAA0100	4071.53	0.218227	0.0986631	2.21184	0.0269777	0.0826474
M6PR	3259.47	0.219928	0.0839349	2.62022	0.0087872	0.0367923
ZNF213	493.32	0.222462	0.0998602	2.22774	0.025898	0.0802365
SP1	3451.01	0.224963	0.104592	2.15088	0.031486	0.092264
JOSD1	2144.71	0.225153	0.0830985	2.70947	0.00673906	0.0304906
MAML1	1468.65	0.228606	0.0990294	2.30847	0.020973	0.0688102
PACS1	2839.35	0.230958	0.0899047	2.56892	0.0102015	0.0408752
PUM2	3470.39	0.231501	0.0854117	2.71041	0.00671993	0.0304372
ANKRD13C	542.128	0.231573	0.0821165	2.82005	0.00480161	0.0239769
RNF40	2470.23	0.23188	0.0922412	2.51384	0.0119423	0.0458369
FBXO11	1176.23	0.236265	0.0821321	2.87665	0.00401925	0.0212066
SNRNP200	6244.42	0.237855	0.0970712	2.45031	0.0142733	0.0521939
PPP2R5C	1781.35	0.239915	0.0993876	2.41393	0.0157813	0.0559348
DGCR2	3501.98	0.240991	0.109457	2.2017	0.0276863	0.0843235
ABL1	2072.16	0.246825	0.116158	2.12491	0.0335937	0.096694
HCFC1	3005.02	0.247475	0.0973987	2.54084	0.0110586	0.0432691
LSM14B	1150.77	0.249005	0.0959365	2.59552	0.00944467	0.0386795
ESYT2	2291.11	0.250486	0.118117	2.12065	0.0339509	0.0973097
MEX3C	1018.47	0.252804	0.115241	2.19369	0.0282576	0.0855944
PI4K2B	959.674	0.252947	0.111859	2.26131	0.0237403	0.0752555
CRAMP1L	769.081	0.254956	0.116246	2.19324	0.02829	0.0856565
ATP6V1C1	1356.57	0.256968	0.0805608	3.18974	0.00142402	0.0102367
PCNXL3	2029.91	0.25738	0.0938997	2.74101	0.00612509	0.0285376
AKT1	3315.69	0.257905	0.102739	2.5103	0.0120629	0.0461835
KPNB1	5606.62	0.258116	0.0886447	2.9118	0.00359353	0.0194818
FNIP1	516.393	0.260384	0.110656	2.35311	0.0186173	0.062956
CBX1	1900.38	0.260432	0.0968025	2.69035	0.00713775	0.0317108
CHD2	1934.9	0.260511	0.0977624	2.66473	0.00770496	0.033532
IBTK	830.457	0.261873	0.113979	2.29756	0.0215868	0.070201
CDV3	4526.42	0.262445	0.103828	2.52769	0.0114817	0.044488
ZFYVE16	776.205	0.263773	0.114965	2.29438	0.0217689	0.0706814
NSF	1058.08	0.265127	0.111312	2.38183	0.017227	0.0596972
YWHAB	7385.69	0.265723	0.0815078	3.2601	0.00111374	0.0086698
STAU1	2842.13	0.266416	0.0854031	3.11951	0.00181151	0.0121574
C6orf106	4230.78	0.266429	0.114546	2.32595	0.0200211	0.0664531
RBMS1	1167.46	0.266626	0.123907	2.15183	0.0314107	0.0920727
GBF1	2243.86	0.267043	0.114483	2.3326	0.0196691	0.0656294
SMC3	1902.6	0.268132	0.126062	2.12698	0.0334218	0.0963287
SF3B1	5624.87	0.268733	0.0911131	2.94944	0.00318346	0.0180596
SEC61A1	10037.4	0.271369	0.107579	2.52252	0.0116517	0.0450041
LLGL1	1461.73	0.271804	0.122402	2.22059	0.0263784	0.0815183
MCFD2	1738.79	0.272753	0.117621	2.31892	0.0203996	0.0673557
ERLIN2	1211.05	0.272777	0.123535	2.2081	0.027237	0.0832734
HBP1	1736.44	0.273197	0.113198	2.41344	0.0158026	0.0559779
RRM1	3781.17	0.273906	0.125835	2.17671	0.0295023	0.0881848
MTOR	1877.33	0.274172	0.126675	2.16438	0.0304355	0.0901366
RBM7	370.621	0.274574	0.10461	2.62473	0.00867165	0.0364918
MSH3	484.979	0.276532	0.10909	2.5349	0.0112479	0.0438487
ATMIN	1291.95	0.277288	0.104966	2.64169	0.00824926	0.0352729
XPO6	2221.76	0.277484	0.0908136	3.05553	0.00224664	0.014162
CTDSP2	5249.82	0.280404	0.128377	2.18423	0.0289453	0.087059
KDM3A	1781.77	0.28106	0.122134	2.30125	0.0213776	0.0697434
UBN1	1881.82	0.281219	0.0919673	3.05782	0.00222954	0.0140815
ADAR	8139.31	0.282514	0.0991759	2.84861	0.00439102	0.0225769
NCAPD2	4247.32	0.28257	0.131438	2.14983	0.0315685	0.0924468
CDC27	1242.61	0.285172	0.095269	2.99333	0.00275951	0.0163687
TPD52	2728.89	0.28606	0.135496	2.1112	0.034755	0.09898
CEP350	1406.32	0.28666	0.122203	2.34576	0.0189884	0.0639833
DNMT1	3967.67	0.286748	0.110168	2.60284	0.00924554	0.038151
AP1B1	3851.16	0.287275	0.083897	3.42413	0.000616764	0.00576076
PPP1CB	7194.42	0.288283	0.103639	2.78161	0.00540904	0.0261675
AP4E1	437.902	0.29031	0.132654	2.18848	0.0286349	0.0863883
UBR7	1308.44	0.292536	0.106372	2.75011	0.00595749	0.0280438
TSC1	817.446	0.293474	0.108653	2.70102	0.0069128	0.0309387
ERBB2IP	2006	0.29379	0.121149	2.42502	0.0153074	0.0548487
UBTD2	697.286	0.293884	0.109774	2.67717	0.00742464	0.0325906
FKBP15	1365.6	0.295931	0.116608	2.53783	0.0111541	0.0435408
UBE4B	1727.13	0.296635	0.121226	2.44695	0.0144069	0.0524502
SEC63	1563.18	0.296799	0.101048	2.93722	0.00331168	0.018529
GOPC	856.539	0.296929	0.112212	2.64615	0.00814141	0.0349585
AARS	3265.65	0.298354	0.1068	2.79358	0.00521288	0.0254603
MBTPS2	397.177	0.298878	0.138509	2.15782	0.0309419	0.0911356
MEF2A	1109.15	0.300839	0.139623	2.15465	0.031189	0.0916575
ZFR	1878.01	0.301855	0.111565	2.70564	0.00681731	0.0306963
AKAP10	387.067	0.30284	0.143736	2.10692	0.0351243	0.0998455
ANKFY1	1783.58	0.303539	0.122687	2.47408	0.0133578	0.0496256
CASK	1186.63	0.304306	0.136296	2.23269	0.0255694	0.079487
TARS	2692.63	0.304437	0.128091	2.37673	0.0174667	0.0603114
SNX27	827.894	0.304571	0.0925201	3.29194	0.000994979	0.00804008
KDM2A	3899.18	0.304628	0.102326	2.97704	0.00291042	0.0169513
KPNA2	4515.64	0.30499	0.120017	2.54123	0.0110463	0.0432489
KIAA1429	1415.72	0.305525	0.114487	2.66864	0.00761595	0.0332473
CYB5B	1495.36	0.305714	0.120375	2.53967	0.0110956	0.0433678
SOS2	820.922	0.30636	0.145421	2.10672	0.0351421	0.0998774
HTT	2392.52	0.306465	0.118852	2.57855	0.00992168	0.0401399
SEL1L	1930.36	0.307459	0.144928	2.12146	0.0338831	0.0971455
C15orf41	287.104	0.308692	0.127926	2.41305	0.0158197	0.0560099
LIMK1	1303.49	0.309225	0.114426	2.70241	0.00688381	0.0308649
TAB2	1910.34	0.310481	0.137925	2.25108	0.0243806	0.0767545
PAFAH1B1	3406.78	0.311313	0.0963043	3.2326	0.0012267	0.00925961
CHORDC1	410.193	0.311522	0.142833	2.18102	0.0291816	0.0874584
2021-09-02	6294.5	0.311844	0.0960257	3.2475	0.00116423	0.00891278
MAP4K3	490.857	0.313051	0.100728	3.1079	0.00188424	0.012472
SAP130	908.74	0.31337	0.0833048	3.76173	0.000168743	0.0023245
TMEM192	302.732	0.315439	0.121222	2.60216	0.00926389	0.0381869
KDM5A	1752.99	0.316888	0.148193	2.13834	0.0324889	0.0943583
MPP5	750.591	0.31755	0.134749	2.3566	0.018443	0.0625283
ACTN4	14212.6	0.318007	0.107463	2.95923	0.00308412	0.0176714
RABGAP1	1772.07	0.318179	0.13072	2.43404	0.0149311	0.0537738
AMFR	1802.15	0.318372	0.11884	2.679	0.00738419	0.0324674
ASAP1	1171.56	0.319976	0.13707	2.3344	0.0195749	0.0653652
KHSRP	3577.75	0.320075	0.096997	3.29985	0.000967373	0.00790409
OSBPL9	1158.59	0.321403	0.104741	3.06855	0.00215098	0.0137298
TTF2	763.544	0.322441	0.146314	2.20377	0.0275409	0.083995
PLEKHG3	1884.18	0.322549	0.142755	2.25946	0.0238551	0.0755411
CAPRIN1	5972.6	0.324101	0.118983	2.72393	0.006451	0.0295774
ZMYND8	806.282	0.324242	0.137712	2.35449	0.018548	0.0627912
RAD50	1092.29	0.325095	0.130794	2.48555	0.012935	0.04848
PPP3CA	1197.42	0.327816	0.13137	2.49537	0.0125825	0.0475823
CYTH3	500.578	0.328913	0.15119	2.17549	0.0295935	0.0883686
ARHGEF11	1105.89	0.331235	0.123957	2.67218	0.00753594	0.0329922
NCBP1	1230.12	0.331498	0.0964487	3.43704	0.0005881	0.00557252
TANC1	1283.33	0.331522	0.153215	2.16377	0.0304819	0.0902323
TRIM25	1767.53	0.331555	0.117716	2.81656	0.0048541	0.0241388
GSTCD	330.672	0.33208	0.1433	2.31738	0.020483	0.0675458
SPTAN1	6264.33	0.332189	0.110909	2.99516	0.00274304	0.0163185
MKLN1	1056.02	0.332545	0.102527	3.24349	0.00118077	0.00900931
GATAD2A	2069.45	0.333783	0.0993842	3.35852	0.000783618	0.00685806
TUG1	3416.05	0.335145	0.107341	3.12225	0.00179473	0.0120922
ATP6V0D1	2204.5	0.335477	0.135568	2.47461	0.0133382	0.0495754
MON2	904.64	0.336043	0.112259	2.99347	0.00275824	0.0163664
YY1	1384.97	0.336558	0.110603	3.04293	0.00234285	0.0145812
TCF20	2213.33	0.337312	0.118647	2.84299	0.00446925	0.0228425
PTPDC1	205.271	0.337496	0.128377	2.62894	0.00856506	0.0361511
ARFGEF1	1702.91	0.339197	0.105882	3.20353	0.00135755	0.00990325
PHF2	1304.38	0.339592	0.123395	2.75207	0.00592199	0.0279265
CD164	4712.16	0.340893	0.114102	2.9876	0.00281173	0.0165801
NFATC3	833.678	0.341784	0.122751	2.78437	0.00536324	0.0259939
OTUD7B	697.82	0.34219	0.120017	2.85117	0.00435587	0.0224466
TNKS2	1579.05	0.342455	0.137728	2.48646	0.0129022	0.0484005
RICTOR	852.467	0.345853	0.149092	2.31973	0.0203555	0.0672706
YME1L1	3103.02	0.349784	0.0932575	3.75073	0.000176319	0.00238351
TOPBP1	2361.93	0.349896	0.159437	2.19457	0.0281945	0.0854881
NFAT5	1088.07	0.350925	0.153502	2.28612	0.0222472	0.0717001
BCOR	979.023	0.351388	0.146885	2.39227	0.0167446	0.0585231
EIF4G3	1463.12	0.351688	0.138063	2.5473	0.0108561	0.0427689
SUCLA2	671.405	0.354016	0.14881	2.37898	0.0173605	0.0600236
ATP2C1	4053.33	0.354097	0.117272	3.01946	0.00253229	0.0153944
GNAQ	1195.85	0.354227	0.124228	2.85143	0.00435229	0.0224344
STX17	837.856	0.354312	0.112813	3.14071	0.00168539	0.0115477
ATP13A2	1390.43	0.35477	0.138563	2.56034	0.0104568	0.0415441
ACBD5	659.239	0.356612	0.131038	2.72143	0.00649998	0.0297388
CREBBP	2616.54	0.357758	0.132801	2.69394	0.00706132	0.031417
RAB3GAP2	920.115	0.360045	0.11513	3.12728	0.00176429	0.0119455
ZFYVE1	589.36	0.360522	0.112492	3.20487	0.00135124	0.00987836
DHX8	1442.23	0.361074	0.0868794	4.15603	3.24e-05	0.000720538
MTDH	3197.37	0.361533	0.0991573	3.64606	0.000266295	0.00322278
GLG1	4146.87	0.36495	0.112498	3.24406	0.00117838	0.00899858
ZBTB44	965.716	0.365574	0.142118	2.57233	0.0101015	0.0406166
DAG1	3552.94	0.36632	0.130425	2.80866	0.00497481	0.0245791
INVS	221.197	0.366889	0.129325	2.83696	0.00455459	0.0231315
CASKIN2	691.822	0.367801	0.114751	3.20519	0.00134971	0.0098751
RPRD2	1585.32	0.368719	0.122342	3.01383	0.0025797	0.0155793
RMI1	638.97	0.369183	0.144732	2.5508	0.0107476	0.0424236
BACE1	613.584	0.369277	0.138408	2.66802	0.00762991	0.0332607
ARFGEF2	1580.5	0.369989	0.160481	2.3055	0.0211389	0.0692233
KIAA0247	2427.46	0.370676	0.122316	3.03047	0.00244172	0.0149879
ERCC6	300.09	0.374657	0.14535	2.57761	0.0099486	0.0402118
PI4KA	1783.43	0.375292	0.102699	3.65428	0.000257907	0.00315038
GAB1	438.94	0.375564	0.150428	2.49663	0.012538	0.0474574
C16orf87	105.215	0.377479	0.149326	2.52789	0.0114751	0.044488
STIL	745.483	0.379361	0.14323	2.64861	0.0080824	0.0347703
GNA11	565.314	0.379466	0.165443	2.29363	0.0218116	0.0707565
PKN2	1366.1	0.380512	0.114321	3.32846	0.000873275	0.00737152
ZMYM1	277.473	0.380781	0.123347	3.08709	0.00202129	0.0131001
WDR26	2274.72	0.380904	0.110101	3.45959	0.000540993	0.00526772
EIF2AK3	754.024	0.381203	0.14001	2.72268	0.00647541	0.029652
ZFYVE26	892.754	0.381304	0.130077	2.93137	0.00337472	0.0187169
UHRF1	1171.24	0.381359	0.142317	2.67965	0.00736993	0.0324281
CHML	567.611	0.382086	0.157616	2.42416	0.0153438	0.0549362
GIGYF2	1418.16	0.383102	0.117667	3.25581	0.0011307	0.00874742
GSPT1	3270.88	0.383309	0.0970156	3.95101	7.78e-05	0.00133981
ATP7A	376.166	0.383805	0.175543	2.18638	0.0287878	0.0867135
ZNF609	1032.36	0.386095	0.130399	2.96088	0.00306764	0.0176041
USP40	800.146	0.386811	0.139595	2.77096	0.00558918	0.0267356
EIF4G2	21383.5	0.38698	0.117019	3.30698	0.000943066	0.00777129
NACC1	2089.29	0.388836	0.110334	3.52416	0.000424833	0.00444563
SCRN1	1740.97	0.39183	0.156244	2.50781	0.012148	0.0464416
TBCEL	187.588	0.393314	0.14648	2.6851	0.00725089	0.0320813
CDC14B	404.143	0.394065	0.170985	2.30468	0.0211847	0.0693362
TRIM59	574.832	0.394663	0.18524	2.13055	0.0331258	0.0956777
HERC2	2186.58	0.394684	0.142044	2.77861	0.00545926	0.0263271
FOXJ2	979.123	0.395587	0.132345	2.98907	0.00279826	0.016529
PSKH1	815.367	0.395863	0.118958	3.32774	0.000875523	0.00737152
PGK1	13944.3	0.396216	0.154129	2.57068	0.01015	0.0407132
NAMPT	2402.23	0.396374	0.179673	2.20608	0.0273782	0.0836215
KIF5B	3645.38	0.397036	0.12548	3.16415	0.00155539	0.0109014
BRAF	152.133	0.397401	0.132525	2.99868	0.00271148	0.0161821
ZBTB26	68.1922	0.397916	0.177903	2.2367	0.0253061	0.078829
BRD4	2429	0.399176	0.114921	3.47348	0.000513753	0.00509171
RB1CC1	1667.01	0.400376	0.130828	3.06031	0.00221105	0.0139973
RAI1	1709.86	0.403917	0.134985	2.99231	0.00276877	0.0164183
ABL2	755.915	0.405635	0.144582	2.80557	0.00502281	0.0247651
RASA1	775.607	0.406078	0.128292	3.16526	0.00154946	0.0108718
ARHGAP27	1154.19	0.407008	0.159086	2.55842	0.0105148	0.0417292
KIAA1715	656.047	0.407265	0.132914	3.06413	0.00218301	0.0138784
PDK1	669.187	0.408751	0.167641	2.43825	0.0147586	0.0532985
IARS	3218.44	0.40935	0.117373	3.48759	0.000487397	0.00488843
CLIC4	3644.67	0.40967	0.149202	2.74574	0.00603755	0.0282394
LYST	584.945	0.409774	0.152812	2.68156	0.00732797	0.0322744
CHD6	1292.98	0.410705	0.172241	2.38448	0.0171034	0.0594208
RSBN1L	432.628	0.410828	0.106619	3.85322	0.000116573	0.00178411
DYNC1H1	8704.42	0.412195	0.134673	3.06072	0.00220806	0.0139944
EIF5	4299.71	0.412513	0.110866	3.72084	0.000198563	0.00257713
NR3C1	1492.62	0.412999	0.136043	3.0358	0.00239895	0.0148047
GRB7	1276.49	0.413795	0.185185	2.23449	0.0254506	0.0792118
VCPIP1	708.301	0.414881	0.130301	3.18401	0.00145251	0.0103828
CBL	763.724	0.415702	0.144074	2.88533	0.00391002	0.0207798
ZNF217	1356.91	0.416533	0.159849	2.60578	0.00916642	0.0379297
MED13L	2182.73	0.417991	0.182714	2.28769	0.0221558	0.0714936
STIM1	1797.6	0.419424	0.110386	3.79962	0.00014492	0.00208238
CCDC132	410.943	0.419538	0.104051	4.03206	5.53e-05	0.00103736
GPATCH8	1370.67	0.420879	0.11153	3.77368	0.000160859	0.00224455
ZBTB4	1934	0.422919	0.113336	3.73154	0.000190316	0.00250498
ACTL6A	2441.94	0.423067	0.125744	3.36451	0.000766805	0.00673664
SVIL	3106.23	0.423434	0.193732	2.18567	0.0288397	0.0868268
AMACR	264.39	0.425889	0.16175	2.63301	0.00846312	0.035886
MBNL1	4353.61	0.425958	0.100882	4.22234	2.42e-05	0.000587147
SPTBN1	5197.43	0.428366	0.157625	2.71762	0.00657524	0.0299595
IGF1R	2354.98	0.430155	0.192551	2.23398	0.0254841	0.0792892
SLC25A13	618.934	0.430922	0.113674	3.79086	0.000150126	0.00212793
FOXN3	1541.12	0.43171	0.163671	2.63768	0.0083476	0.0355333
EPHB4	2526.38	0.432864	0.142388	3.04004	0.00236548	0.0146821
SPIN1	2070.4	0.433188	0.122544	3.53496	0.000407842	0.00432742
KIAA1524	619.988	0.435779	0.172959	2.51955	0.0117504	0.0452518
PRKAA1	1202.04	0.43585	0.109501	3.98032	6.88e-05	0.00122703
PAPOLA	3694.41	0.436338	0.106358	4.10252	4.09e-05	0.000846664
BMP2K	420.132	0.436346	0.203881	2.1402	0.0323383	0.094023
HIATL1	2023.69	0.436539	0.113658	3.8408	0.000122635	0.00185215
WDR44	479.337	0.437	0.151738	2.87996	0.00397726	0.0210374
C11orf30	485.539	0.439507	0.195981	2.2426	0.0249223	0.0779647
TBL1XR1	4408.35	0.440113	0.137214	3.20749	0.001339	0.00984384
DTX3L	3884.39	0.44047	0.181445	2.42757	0.0152004	0.05454
ELF1	1535.58	0.440522	0.156279	2.81882	0.00482005	0.0240412
LRRC16A	770.286	0.440857	0.167009	2.63973	0.00829727	0.0353874
USP9X	3291.76	0.442931	0.165886	2.67009	0.00758302	0.0331351
JMY	794.97	0.443429	0.12593	3.52124	0.000429535	0.00446579
ARID3A	120.595	0.445518	0.18367	2.42564	0.0152813	0.0547875
BBX	1491.93	0.445749	0.158065	2.82003	0.00480192	0.0239769
PAWR	349.459	0.448142	0.133598	3.35441	0.000795351	0.00691454
HELZ	1220.27	0.450138	0.150991	2.98122	0.00287098	0.0168016
ARAP2	999.053	0.450499	0.174025	2.5887	0.0096339	0.039236
2021-03-07	1786.78	0.450591	0.103162	4.3678	1.26e-05	0.000381018
CBLB	547.474	0.450921	0.164007	2.7494	0.00597045	0.0280688
ERBB3	2384.88	0.451534	0.184499	2.44736	0.0143909	0.0524148
PLEKHM1	1045.22	0.453301	0.128643	3.52372	0.000425529	0.00444563
PNPLA8	786.571	0.453406	0.117092	3.87222	0.000107849	0.00168005
RSF1	640.305	0.453511	0.16801	2.69931	0.00694826	0.0310647
MAPK1	3230.92	0.453624	0.0982814	4.61557	3.92e-06	0.000171655
FAM83D	1373.97	0.453985	0.170377	2.66459	0.00770811	0.0335378
FAM102A	2755.46	0.454666	0.134894	3.37055	0.000750178	0.00664149
UBR5	2579.23	0.456041	0.132182	3.45009	0.000560397	0.0053829
SHCBP1	436.551	0.456692	0.154637	2.95332	0.00314375	0.0178897
LNX2	646.792	0.457054	0.143828	3.17779	0.00148404	0.0105587
WDFY3	890.167	0.457308	0.166639	2.7443	0.00606399	0.028327
TES	1573.14	0.457719	0.130921	3.49616	0.00047201	0.00477386
SLC12A2	758.613	0.459567	0.212392	2.16376	0.0304826	0.0902323
ECT2	2553.52	0.459668	0.182689	2.51612	0.0118655	0.0455991
TSTD2	466.062	0.459673	0.161407	2.84792	0.00440062	0.0225968
ZNF292	847.213	0.460174	0.171758	2.6792	0.00737989	0.0324563
TJP2	2994.64	0.461005	0.156609	2.94367	0.00324347	0.0182869
BAZ2A	2675.24	0.461328	0.119886	3.84804	0.000119067	0.00180606
C10orf118	482.56	0.462957	0.211008	2.19403	0.0282334	0.0855634
PRKCI	1852.96	0.464981	0.159084	2.92287	0.00346819	0.0190672
TYRO3	475.867	0.465835	0.170179	2.73732	0.00619416	0.02873
CCDC120	641.376	0.466915	0.163018	2.86419	0.00418072	0.0218585
YEATS2	1992.29	0.469023	0.145684	3.21945	0.00128436	0.00956406
UBR2	799.917	0.470308	0.150632	3.12224	0.0017948	0.0120922
CPEB2	434.288	0.474104	0.214093	2.21447	0.0267964	0.0822556
FLNA	25819.5	0.474256	0.194592	2.43718	0.0148021	0.0533833
RFWD3	1531.85	0.474482	0.127936	3.70875	0.000208289	0.00266874
ITPR3	5366.3	0.475392	0.190468	2.49591	0.0125634	0.047544
CPSF2	1481.58	0.477021	0.110697	4.30925	1.64e-05	0.000454668
NIPBL	2192.89	0.480294	0.140876	3.40934	0.000651197	0.00598481
NPAT	468.183	0.481141	0.143364	3.35609	0.000790522	0.00688957
ANTXR1	2137.57	0.482195	0.207578	2.32296	0.0201815	0.0668173
TULP4	844.126	0.482514	0.136747	3.52851	0.000417909	0.00439608
KLF10	1892.65	0.482864	0.227356	2.12382	0.0336851	0.0968428
ASH1L	1675.97	0.483187	0.16188	2.98484	0.0028373	0.016663
BCL6	1676.81	0.483233	0.172025	2.80908	0.00496828	0.024558
AHR	1929.43	0.484472	0.193722	2.50086	0.0123893	0.0470305
APOOL	127.788	0.48503	0.224778	2.15782	0.0309418	0.0911356
QSER1	1665.2	0.48632	0.139945	3.47507	0.000510716	0.00506434
ATF7IP	1097.49	0.487267	0.169161	2.88049	0.0039706	0.0210104
ZNFX1	1908.87	0.487413	0.154933	3.14596	0.00165545	0.0113979
NPEPPS	2312.25	0.488505	0.119008	4.10482	4.05e-05	0.000842103
EVI5L	513.755	0.488592	0.113955	4.28757	1.81e-05	0.000485626
ATG2B	660.706	0.488702	0.157282	3.10717	0.0018889	0.0124861
PIM1	1993.14	0.489185	0.215153	2.27366	0.0229863	0.0734942
IGF2R	4294.68	0.489917	0.16499	2.96938	0.00298404	0.0172649
PEX26	474.701	0.490346	0.127429	3.84799	0.00011909	0.00180606
FAM120A	4840.91	0.494241	0.113642	4.34911	1.37e-05	0.000401004
C1orf106	2327.45	0.494758	0.228576	2.16452	0.0304245	0.0901186
PHC3	1540.02	0.496703	0.171126	2.90256	0.00370128	0.0199187
TIAM1	1161.51	0.497343	0.160717	3.09452	0.00197132	0.012849
AGPS	1216.28	0.497986	0.121898	4.08528	4.4e-05	0.000891903
FURIN	2952.62	0.499323	0.15957	3.12918	0.00175296	0.011888
ESRP1	3308.6	0.501115	0.120511	4.15825	3.21e-05	0.0007162
KIF13A	1052.67	0.501219	0.207802	2.412	0.0158652	0.0561126
PJA2	2309.2	0.503819	0.149563	3.3686	0.000755512	0.0066726
CLSPN	419.168	0.506266	0.19314	2.62124	0.00876098	0.0367496
PLSCR1	2386.13	0.508394	0.188036	2.70371	0.00685707	0.0308072
NCKAP1	3791.84	0.511395	0.14258	3.58671	0.000334875	0.00379242
DLG1	2197.58	0.512405	0.13667	3.74922	0.000177382	0.00238789
MSI2	254.084	0.513302	0.172445	2.97662	0.00291446	0.0169586
MLL3	1517.28	0.514488	0.160914	3.19729	0.00138725	0.0100241
ZBTB7B	2199.85	0.515927	0.149074	3.46088	0.000538421	0.00525444
ZDHHC3	1915.82	0.517034	0.118094	4.37816	1.2e-05	0.000372569
ARHGAP5	1964.82	0.517208	0.147456	3.50754	0.000452271	0.00463003
BPGM	785.157	0.517249	0.169696	3.04809	0.002303	0.0144065
ZNF148	1346.53	0.517395	0.139632	3.70541	0.000211048	0.00268719
TMEM2	960.459	0.518311	0.196149	2.64243	0.00823137	0.0352457
TNRC6B	984.256	0.523425	0.126981	4.12209	3.75e-05	0.000801275
PLEKHA7	567.96	0.523948	0.206534	2.53686	0.0111852	0.0436377
SMC2	1957.9	0.52549	0.150549	3.4905	0.000482126	0.00484903
KPNA4	2719	0.52616	0.114711	4.58682	4.5e-06	0.000186266
ZHX3	509.319	0.526785	0.150756	3.49428	0.000475337	0.00479918
CAMSAP1	2047.78	0.52789	0.118132	4.46864	7.87e-06	0.00027702
GTF2I	2434.74	0.530488	0.177407	2.99023	0.00278764	0.0164929
ADAM9	2666.57	0.531022	0.185305	2.86567	0.00416133	0.0217932
MED13	1859.76	0.532018	0.126648	4.20076	2.66e-05	0.00062774
MKL2	1108.5	0.532198	0.145145	3.66667	0.000245732	0.00302835
PHLPP1	823.072	0.534954	0.116159	4.60536	4.12e-06	0.000175978
SAMD4B	1889.16	0.534968	0.118409	4.51799	6.24e-06	0.000234083
HLTF	1954.5	0.53678	0.166698	3.22007	0.0012816	0.00955594
CCL28	73.2331	0.537089	0.184517	2.91078	0.00360532	0.0195325
CLOCK	409.77	0.537794	0.233722	2.301	0.0213917	0.0697771
HSPG2	9649.75	0.538022	0.232287	2.31619	0.0205479	0.067687
PAK2	3744.18	0.5381	0.121249	4.43798	9.08e-06	0.000306055
PHACTR2	624.173	0.538207	0.186081	2.89233	0.00382401	0.0204203
NRP1	994.391	0.539874	0.220189	2.45187	0.0142118	0.0520313
DZIP1L	99.5327	0.540777	0.255318	2.11806	0.0341704	0.0978011
MFSD1	1931.96	0.542552	0.151472	3.58187	0.000341148	0.00384683
IDE	513.823	0.543012	0.195519	2.77728	0.00548161	0.0263876
RBL1	415.106	0.543509	0.212063	2.56296	0.0103784	0.0413759
MCM2	6653.93	0.543799	0.147447	3.68811	0.000225928	0.00283337
EP300	2501.99	0.54425	0.167506	3.24914	0.00115756	0.00887653
GALNT10	669.754	0.548376	0.183554	2.98754	0.00281233	0.0165801
CHD9	954.635	0.548852	0.171018	3.20932	0.00133049	0.00980489
B3GNT9	493.995	0.549089	0.146601	3.74546	0.000180062	0.00240981
ARHGAP24	329.933	0.550495	0.237845	2.31451	0.0206397	0.0679528
YAP1	2187.64	0.553967	0.179695	3.08282	0.00205046	0.0132517
ATP2B1	1232.75	0.554927	0.168769	3.28809	0.00100868	0.00810083
C6orf132	448.192	0.55574	0.234284	2.37208	0.0176884	0.0608247
PRKDC	8155.91	0.557254	0.159634	3.49082	0.000481549	0.00484588
PARP9	3186.96	0.559685	0.201307	2.78025	0.0054317	0.0262494
STRN	424.141	0.560661	0.249099	2.25075	0.0244011	0.0767808
POLQ	606.469	0.56132	0.192871	2.91034	0.00361036	0.0195499
CDC42BPB	2911.95	0.561841	0.164455	3.41638	0.000634593	0.00586454
PPL	9482.84	0.562488	0.243413	2.31084	0.0208419	0.0684464
RALGPS2	551.161	0.564845	0.226204	2.49706	0.0125228	0.0474197
DENND1B	111.047	0.565057	0.214728	2.6315	0.00850097	0.03598
MAP3K2	684.062	0.57	0.175797	3.24237	0.00118538	0.00902391
FRK	167.383	0.570593	0.252619	2.25871	0.0239012	0.075635
CPOX	805.572	0.571034	0.150716	3.78882	0.000151366	0.00213831
DCBLD1	450.082	0.571087	0.193441	2.95225	0.00315469	0.0179297
KLHDC10	494.822	0.572886	0.178035	3.21782	0.00129169	0.00959997
HSP90AA1	21532.6	0.575099	0.144496	3.98002	6.89e-05	0.00122703
MICALL1	3243.83	0.575394	0.16658	3.45415	0.000552027	0.0053383
HIVEP2	1252.68	0.575913	0.175472	3.28208	0.00103044	0.00822511
DNAJC13	1985.22	0.576652	0.145443	3.96479	7.35e-05	0.00128154
TJP1	2624.25	0.577785	0.166483	3.47055	0.0005194	0.00513657
KLF3	2896	0.578777	0.139827	4.13923	3.48e-05	0.000757013
ZDBF2	237.316	0.57938	0.261011	2.21975	0.0264356	0.0815813
RASAL2	751.662	0.581368	0.196443	2.95947	0.00308173	0.0176684
TRIO	1396.95	0.581781	0.20179	2.88311	0.00393774	0.0208908
GLI3	659.925	0.582169	0.227358	2.56058	0.0104499	0.0415255
TBC1D2	1868.31	0.585249	0.198155	2.95349	0.00314206	0.0178856
PITPNM3	800.949	0.585541	0.207655	2.81978	0.00480564	0.023989
BOK	814.548	0.589089	0.23179	2.54148	0.0110384	0.0432455
INCENP	1005.72	0.589837	0.142207	4.14775	3.36e-05	0.000738145
NETO2	747.423	0.592355	0.174151	3.40139	0.000670441	0.00610961
NRP2	1220.16	0.593921	0.229769	2.58486	0.00974176	0.0395604
EXPH5	358.53	0.594149	0.198378	2.99504	0.00274408	0.0163194
NACC2	73.555	0.595457	0.198563	2.99883	0.00271022	0.016181
CASC5	484.607	0.596171	0.236337	2.52255	0.0116508	0.0450041
BNIP3	703.543	0.598255	0.276389	2.16454	0.0304231	0.0901186
LEPROT	439.577	0.598307	0.210903	2.83688	0.00455565	0.0231315
ICK	743.597	0.598357	0.167391	3.57461	0.00035075	0.00392321
DVL3	4043.22	0.601763	0.153517	3.91984	8.86e-05	0.00145075
EIF2AK2	659.572	0.602083	0.187933	3.20371	0.00135668	0.00990325
NEK7	1054.21	0.604573	0.166015	3.64168	0.000270862	0.00325923
MCM4	4883.49	0.606585	0.15162	4.0007	6.32e-05	0.00114988
DHX36	1344.05	0.608145	0.133393	4.55904	5.14e-06	0.00020527
SH3BP4	1589.26	0.612813	0.143068	4.28336	1.84e-05	0.000491751
XRN1	1542.38	0.614834	0.157701	3.89874	9.67e-05	0.00155511
STAM	579.716	0.61781	0.123698	4.99451	5.9e-07	4.76e-05
ZFHX3	527.694	0.620213	0.190459	3.25641	0.00112829	0.00873248
GMPS	2623.5	0.621187	0.125471	4.95084	7.39e-07	5.46e-05
ZSCAN12P1	17.0413	0.621969	0.26555	2.34219	0.0191707	0.0644
SH3D19	997.46	0.623422	0.187868	3.31841	0.000905327	0.00753138
UGCG	488.047	0.625474	0.251485	2.48712	0.0128781	0.0483654
NOTCH2	3599.06	0.627974	0.185867	3.37862	0.000728512	0.00648726
ZMAT3	164.43	0.628922	0.247611	2.53996	0.0110867	0.0433444
MYOF	3779.83	0.62907	0.22155	2.83941	0.00451976	0.0230194
GALNT7	773.433	0.630871	0.24788	2.54507	0.0109256	0.0429598
ZCCHC14	1010.01	0.632014	0.147157	4.29482	1.75e-05	0.000474904
PAK6	873.394	0.633105	0.179577	3.52553	0.000422638	0.00443311
OAS3	4531.79	0.634902	0.223236	2.84408	0.00445403	0.0227986
MALL	4153.48	0.637365	0.226839	2.80977	0.00495768	0.0245272
EPB41L1	1722.75	0.637725	0.218126	2.92366	0.00345947	0.0190272
TLE4	864.351	0.640372	0.156645	4.08805	4.35e-05	0.000884274
TGFBR3	222.059	0.64155	0.249946	2.56676	0.0102654	0.0410592
PPP2R5E	761.644	0.642174	0.143841	4.46448	8.03e-06	0.000280892
PCDH18	112.247	0.644025	0.28084	2.29321	0.021836	0.0707729
STXBP5	398.662	0.655619	0.224413	2.92149	0.00348367	0.0191179
C10orf12	154.9	0.658145	0.190961	3.44649	0.000567929	0.00544327
NRIP1	1377.44	0.659034	0.204551	3.22185	0.00127366	0.0095006
SLC38A2	7858.75	0.659058	0.160584	4.10413	4.06e-05	0.000842469
RORA	538.352	0.66037	0.217419	3.03732	0.00238694	0.0147455
PTPRK	1772.79	0.661047	0.154084	4.29016	1.79e-05	0.000480922
LONP2	894.593	0.664485	0.148869	4.46356	8.06e-06	0.000280978
LMLN	356.73	0.664748	0.178112	3.7322	0.000189817	0.00250411
ANKRD50	751.333	0.666964	0.202356	3.296	0.000980723	0.00798825
OTUB2	122.549	0.670804	0.203616	3.29446	0.000986104	0.00801451
SNX30	593.931	0.67468	0.13795	4.89076	1e-06	6.75e-05
MYH9	32373.7	0.678343	0.139726	4.8548	1.21e-06	7.73e-05
ZNF827	233.762	0.686275	0.272708	2.51652	0.0118521	0.045567
RNF11	2143.03	0.696982	0.137233	5.07881	3.8e-07	3.53e-05
MXRA5	2498.56	0.698558	0.327418	2.13354	0.0328806	0.0951043
ARHGAP32	1239.19	0.700533	0.215201	3.25525	0.00113295	0.00875739
STT3B	1379.29	0.704661	0.171635	4.10559	4.03e-05	0.000840656
TRPS1	677.815	0.706523	0.266998	2.64617	0.00814083	0.0349585
PIK3CA	708.617	0.708076	0.167386	4.23021	2.33e-05	0.000571533
EHF	4156.2	0.708172	0.261487	2.70825	0.00676399	0.0305237
ASCC3	1527.57	0.710959	0.165722	4.29006	1.79e-05	0.000480922
NOS1AP	57.2134	0.716004	0.280324	2.5542	0.0106433	0.0421023
WNK1	4516.07	0.720679	0.184526	3.90558	9.4e-05	0.00151717
RHOD	919.628	0.72125	0.293437	2.45794	0.0139736	0.0513132
WNT7B	1314.09	0.724701	0.224781	3.22403	0.00126399	0.00945541
PLK2	1253.81	0.727809	0.248648	2.92706	0.00342181	0.018903
SNAPC1	341.778	0.731859	0.16922	4.32489	1.53e-05	0.00043313
LOC154761	63.8707	0.735135	0.199237	3.68975	0.000224473	0.00282092
BCAT1	363.185	0.74092	0.286302	2.5879	0.00965637	0.0392919
LPP	387.868	0.742392	0.250319	2.96579	0.00301911	0.0174128
PRR11	229.402	0.744835	0.267173	2.78783	0.00530617	0.0258081
IFIT3	1700.14	0.745667	0.345462	2.15847	0.0308916	0.0910414
C1orf226	498.145	0.748053	0.285685	2.61846	0.00883288	0.0369413
ZNF462	362.1	0.75018	0.285496	2.62763	0.00859811	0.0362655
ADAM10	1581.38	0.752895	0.202155	3.72434	0.000195827	0.00255006
OAS2	3434.79	0.757579	0.28186	2.68779	0.00719267	0.0318622
SLFN5	1211.09	0.757653	0.244615	3.09733	0.00195273	0.012796
SLC30A4	80.5688	0.764073	0.251754	3.035	0.00240536	0.0148329
TET1	40.6089	0.764433	0.287585	2.65811	0.00785796	0.0339961
CCRN4L	174.287	0.767213	0.218451	3.51205	0.000444657	0.00456739
SOX6	256.375	0.770992	0.312972	2.46345	0.0137607	0.0507448
TRIM2	1311.71	0.77178	0.265039	2.91195	0.00359176	0.0194818
DNM1	415.202	0.775941	0.30431	2.54984	0.0107773	0.0425316
ELL2	2033.67	0.77675	0.179065	4.33781	1.44e-05	0.00041618
CEP97	247.58	0.777269	0.206426	3.76536	0.000166308	0.00229613
ARSJ	227.361	0.781612	0.316412	2.47024	0.0135023	0.049993
ATP10D	845.083	0.784455	0.188018	4.17224	3.02e-05	0.000682743
COL5A2	3186.18	0.788268	0.306182	2.5745	0.0100384	0.0404336
TFPI	416.841	0.789242	0.314135	2.51243	0.0119902	0.0459627
VGLL3	108.986	0.79643	0.326783	2.43718	0.0148023	0.0533833
DYNLT3	940.538	0.799988	0.220508	3.62793	0.000285703	0.00338833
FAM135A	869.623	0.801035	0.190236	4.21076	2.55e-05	0.00060684
TRERF1	658.222	0.80335	0.171096	4.69531	2.66e-06	0.000131208
CHSY3	65.9732	0.804413	0.286123	2.81142	0.00493234	0.024422
SLC38A7	255.993	0.804519	0.179493	4.48217	7.39e-06	0.000263779
TANC2	1108.56	0.809351	0.195328	4.14354	3.42e-05	0.000749126
UHMK1	533.541	0.811587	0.313551	2.58837	0.00964306	0.0392552
RALB	1883.24	0.818794	0.197071	4.15481	3.26e-05	0.000721784
ADAMTS2	368.707	0.82304	0.352347	2.33588	0.0194976	0.0651875
DPP4	109.119	0.8244	0.336764	2.44801	0.0143648	0.0523304
DIO2	1003.34	0.824769	0.359781	2.29242	0.0218816	0.0708707
PLAT	2969.17	0.827271	0.384424	2.15198	0.0313992	0.0920537
SEMA3C	846.14	0.833785	0.370541	2.25019	0.0244371	0.0768334
CARD6	439.746	0.835284	0.311268	2.68348	0.00728596	0.0321589
DAAM1	606.981	0.835799	0.226464	3.69065	0.000223679	0.0028148
WNT5A	1004.67	0.837276	0.283239	2.95608	0.00311576	0.0177801
PRKAR2A	289.488	0.84139	0.248998	3.3791	0.00072724	0.0064839
NCOA2	652.612	0.842147	0.307478	2.73889	0.00616472	0.0286423
TOR1AIP2	434.468	0.845325	0.202832	4.16761	3.08e-05	0.000693321
LMBRD2	161.051	0.855237	0.227917	3.7524	0.000175148	0.002377
LIPH	325.195	0.855784	0.371463	2.30382	0.0212328	0.0693911
IL1RL1	14.2119	0.865115	0.372333	2.3235	0.0201525	0.0667696
NCKAP5	143.327	0.865402	0.307498	2.81434	0.00488778	0.0242668
GTF2A1	197.63	0.870342	0.267803	3.24994	0.0011543	0.0088668
MYLK	1029.72	0.881394	0.302461	2.91407	0.00356746	0.0194093
FRMD6	2596.33	0.883697	0.196069	4.50707	6.57e-06	0.000241516
PRICKLE1	175.052	0.897947	0.306106	2.93345	0.00335214	0.0186699
ZDHHC20	308.079	0.898803	0.309651	2.90264	0.00370037	0.0199187
REL	163.308	0.899497	0.292252	3.07781	0.00208528	0.0134012
SKIL	786.881	0.905107	0.232356	3.89535	9.81e-05	0.00156747
SSFA2	2562.69	0.912217	0.202227	4.51085	6.46e-06	0.000239036
SERTAD4	136.024	0.919297	0.312405	2.94265	0.00325417	0.0183191
CD109	2346.18	0.923028	0.219874	4.19799	2.69e-05	0.000633824
PFN2	2022.71	0.938531	0.320727	2.92626	0.0034306	0.0189448
ISPD	26.7764	0.93939	0.283051	3.31879	0.00090407	0.00752776
INHBA	199.966	0.954539	0.419614	2.2748	0.0229178	0.0733842
UBXN7	699.476	0.959047	0.233826	4.10154	4.1e-05	0.000849001
BDNF	50.583	0.963609	0.342447	2.81389	0.00489461	0.0242942
TSC22D2	679.246	0.974275	0.197513	4.93271	8.11e-07	5.72e-05
ABAT	290.9	0.985955	0.312179	3.1583	0.00158691	0.0110547
PLSCR4	462.147	0.993631	0.276366	3.59534	0.000323965	0.00369857
SLC16A7	67.9898	1.00679	0.443175	2.27177	0.0231002	0.0737699
MYH10	871.228	1.00718	0.323235	3.11593	0.00183367	0.0122663
PLAG1	114.565	1.02508	0.362636	2.82674	0.00470241	0.023667
SIPA1L2	1070.67	1.03427	0.236471	4.37378	1.22e-05	0.000375662
SLC28A3	155.104	1.04022	0.362291	2.87123	0.00408881	0.0214747
ABCA12	580.062	1.04273	0.378487	2.75499	0.00586934	0.02775
IFIT1	849.998	1.04346	0.350319	2.97861	0.00289562	0.0168881
NFKBIZ	1234.64	1.05142	0.293922	3.5772	0.00034729	0.00390169
HIF1A	4994.45	1.05516	0.204106	5.16965	2.35e-07	2.44e-05
PPFIA1	1384.79	1.05997	0.206523	5.13246	2.86e-07	2.83e-05
PCSK5	145.693	1.06321	0.404387	2.6292	0.00855869	0.0361325
DDX60	1478.42	1.10807	0.295974	3.74381	0.000181249	0.00241864
ADAMTS12	103.14	1.11062	0.433908	2.55957	0.0104803	0.0416209
MME	143.271	1.11329	0.411109	2.70802	0.00676864	0.0305372
IFIT2	579.457	1.11442	0.336952	3.30735	0.000941847	0.00776823
MFHAS1	841.429	1.12572	0.213103	5.28254	1.27e-07	1.59e-05
EXOC6B	278.356	1.1269	0.247159	4.55942	5.13e-06	0.00020527
PPP2R3A	870.827	1.2003	0.245283	4.89353	9.9e-07	6.7e-05
RNF168	661.767	1.20581	0.249408	4.83466	1.33e-06	8.21e-05
ABCC5	4027.9	1.2279	0.248513	4.94099	7.77e-07	5.61e-05
NOTUM	42.7789	1.2298	0.390621	3.14832	0.00164211	0.0113402
CPA4	203.013	1.26585	0.541857	2.33613	0.0194844	0.0651551
SYTL5	48.1751	1.2687	0.571685	2.21923	0.0264713	0.0816403
IGF2BP3	696.423	1.31008	0.354935	3.69103	0.000223351	0.0028126
MGLL	1453.81	1.31368	0.288732	4.54982	5.37e-06	0.000209903
STAC	49.8863	1.31899	0.495226	2.66341	0.00773527	0.0336161
B4GALT4	1854.48	1.38872	0.289845	4.79124	1.66e-06	9.35e-05
SAMD9	2593.04	1.40124	0.317198	4.41755	9.98e-06	0.000328013
EDIL3	111.489	1.44795	0.436731	3.31543	0.000915027	0.00758454
KLK10	2849.55	1.50085	0.543972	2.75906	0.00579686	0.0274923
IGF2BP2	924.143	1.5097	0.423725	3.56292	0.000366753	0.00404842
CGB8	0.897477	1.52829	0.725256	2.10725	0.0350961	0.0997963
FBN2	606.39	1.62599	0.474148	3.42929	0.000605172	0.00568725
KLK7	740.956	1.635	0.724308	2.25732	0.023988	0.075857
MED12L	25.8629	1.64084	0.327043	5.01721	5.24e-07	4.35e-05
SYT1	58.1704	1.66693	0.473926	3.51727	0.000436002	0.00451134
PHLDB2	1185.95	1.75229	0.291781	6.00548	1.91e-09	8.52e-07
PCDH10	12.912	1.768	0.733542	2.41023	0.0159425	0.0563316
PSG4	6.03777	1.80129	0.664982	2.70878	0.00675307	0.0305156
GABRA3	24.4863	1.83535	0.467674	3.92443	8.69e-05	0.00143823
TM4SF19	94.4723	1.99899	0.448499	4.45706	8.31e-06	0.000288286
NPR3	104.039	2.00106	0.429957	4.65411	3.25e-06	0.000150656
FIBCD1	22.0107	2.36104	0.575036	4.1059	4.03e-05	0.000840656
PKD1L2	2.66296	2.38842	0.6684	3.57334	0.000352452	0.00393017
GPR1	80.2475	2.49746	0.446753	5.59025	2.27e-08	4.89e-06
CDH18	1.30248	3.09408	1.28191	2.41365	0.0157934	0.0559669
FLG	408.689	3.60463	0.524999	6.86598	6.6e-12	1.01e-08
NEFM	139.695	4.03811	0.734649	5.49665	3.87e-08	7.03e-06
CDSN	700.959	4.53024	0.631931	7.16889	7.56e-13	2.18e-09

## Sheet: TCGA_104sh2_direct
	baseMean	log2FoldChange	lfcSE	stat	pvalue	padj
GAS2L2	7.24324	-2.10751	0.608551	-3.46316	0.000533864	0.00523164
TNNT3	358.568	-2.05388	0.585911	-3.50545	0.000455844	0.00465881
CYP1B1	738.608	-1.77899	0.418599	-4.24986	2.14e-05	0.000539466
EBF3	128.269	-1.75651	0.344476	-5.09907	3.41e-07	3.24e-05
MTUS2	12.4101	-1.71054	0.55663	-3.07302	0.00211901	0.0135752
MMP7	600.603	-1.59926	0.427549	-3.74053	0.000183634	0.00244157
RPL3L	11.0729	-1.5989	0.635904	-2.51438	0.0119242	0.0457866
KREMEN2	879.715	-1.50012	0.438836	-3.41841	0.00062988	0.00584456
IL1R2	2834.43	-1.40047	0.575811	-2.43217	0.0150085	0.0539887
PRODH	1150.72	-1.24341	0.312865	-3.97427	7.06e-05	0.00124941
ICAM2	277.491	-1.2414	0.255939	-4.85036	1.23e-06	7.76e-05
DUSP4	280.954	-1.21326	0.284089	-4.2707	1.95e-05	0.000508827
DOK7	61.2753	-1.17843	0.451325	-2.61104	0.0090268	0.0375383
ZNF239	48.6453	-1.17833	0.269775	-4.36783	1.25e-05	0.000381018
KLHL30	19.1461	-1.15092	0.487027	-2.36315	0.0181201	0.0618222
SLC35F3	19.9363	-1.12058	0.505756	-2.21565	0.0267155	0.0821032
TCP10L	7.98021	-1.09764	0.279792	-3.92306	8.74e-05	0.00144091
SNCG	425.346	-1.08619	0.389031	-2.79205	0.00523756	0.0255356
SERPINF1	3538.05	-0.995585	0.335979	-2.96324	0.00304423	0.0175136
KBTBD11	69.1926	-0.967081	0.329894	-2.93149	0.00337341	0.0187169
SOCS1	469.664	-0.964477	0.290857	-3.31598	0.000913215	0.00757638
SYTL3	279.266	-0.959041	0.26095	-3.67519	0.000237673	0.0029564
CYB5A	756.309	-0.94431	0.316687	-2.98184	0.0028652	0.0167785
CD1D	29.5825	-0.914365	0.258848	-3.53243	0.000411754	0.00435264
GGT1	294.251	-0.904945	0.317112	-2.85371	0.00432122	0.0223308
YPEL1	226.628	-0.885472	0.258419	-3.4265	0.000611407	0.00572406
RHOBTB2	562.968	-0.885105	0.23167	-3.82054	0.000133161	0.00196241
MMP28	1377.29	-0.880373	0.398972	-2.2066	0.0273419	0.0835519
RASGRF1	19.7292	-0.873943	0.327436	-2.66905	0.00760655	0.03323
OLFM1	1845.4	-0.856419	0.400734	-2.13713	0.0325875	0.0945443
CLYBL	70.3386	-0.85101	0.184116	-4.62214	3.8e-06	0.000167666
RPS26	706.774	-0.849247	0.164784	-5.15371	2.55e-07	2.59e-05
RPS19	21997.7	-0.848579	0.190111	-4.46359	8.06e-06	0.000280978
PTP4A3	745.794	-0.832771	0.253729	-3.28213	0.00103026	0.00822511
RPS24	15660.1	-0.817555	0.179584	-4.55249	5.3e-06	0.00020904
TOMM7	1424.53	-0.816169	0.168658	-4.8392	1.3e-06	8.05e-05
RPS21	8139.06	-0.813111	0.211248	-3.84908	0.000118564	0.00180405
RPL31	10539.3	-0.812748	0.166206	-4.89001	1.01e-06	6.75e-05
KLHL31	20.3792	-0.791187	0.340824	-2.32139	0.0202656	0.0670099
HAUS7	486.855	-0.790331	0.208488	-3.79077	0.00015018	0.00212793
RPL37A	13273.5	-0.787919	0.184594	-4.26839	1.97e-05	0.000509133
MPP3	81.8831	-0.77661	0.235808	-3.2934	0.000989837	0.00802242
ARHGAP22	144.602	-0.773702	0.19895	-3.88893	0.000100687	0.00159835
SLC12A7	2263.49	-0.765586	0.297923	-2.56975	0.0101773	0.0407961
PIM2	1145.85	-0.760776	0.257974	-2.94904	0.0031876	0.0180775
RPS20	15443.4	-0.723725	0.179219	-4.03821	5.39e-05	0.00101701
ABLIM2	408.603	-0.722605	0.301012	-2.40058	0.016369	0.0575172
LPXN	427.187	-0.716991	0.234037	-3.06359	0.00218701	0.0138894
CCDC88B	601.867	-0.712025	0.249891	-2.84934	0.004381	0.0225444
PCBD1	699.273	-0.711289	0.142512	-4.99107	6e-07	4.83e-05
RPL41	18491.3	-0.709091	0.164354	-4.31442	1.6e-05	0.000448108
SP6	239.812	-0.691071	0.252428	-2.73769	0.00618717	0.0287194
CAMK1G	7.99221	-0.689769	0.29913	-2.30592	0.0211153	0.0691584
RPLP1	24791.8	-0.683267	0.173223	-3.94443	8e-05	0.00136431
CD83	582.773	-0.681061	0.219599	-3.10139	0.00192615	0.012658
MACROD1	273.988	-0.678111	0.206142	-3.28954	0.00100353	0.00807926
ST3GAL5	227.946	-0.673303	0.244153	-2.75771	0.00582076	0.0275762
COX6C	2420.2	-0.668919	0.182887	-3.65756	0.000254623	0.00312066
PHLDA3	2134.2	-0.665442	0.18281	-3.64007	0.000272561	0.00327027
MRPL23	964.561	-0.662412	0.162608	-4.07367	4.63e-05	0.000920285
STAB1	901.58	-0.657762	0.209076	-3.14605	0.00165493	0.0113979
PTTG1	2154.12	-0.655804	0.192651	-3.4041	0.000663822	0.00606721
RPS4X	22734.2	-0.653722	0.199813	-3.27167	0.00106915	0.00845314
CD40	850.902	-0.649036	0.211847	-3.06371	0.00218611	0.0138885
ECHDC2	593.565	-0.645011	0.183974	-3.506	0.000454899	0.00465175
GADD45A	1278.04	-0.643449	0.212297	-3.03089	0.00243833	0.0149721
TNFRSF25	316.464	-0.64249	0.21906	-2.93294	0.00335769	0.0186735
ARID5A	619.705	-0.642219	0.160795	-3.99402	6.5e-05	0.00117698
RPL30	13672.2	-0.641989	0.167481	-3.83321	0.000126483	0.0018962
FRMD4A	729.959	-0.636725	0.266907	-2.38557	0.0170526	0.0593393
GLTSCR2	5413.54	-0.63615	0.169943	-3.74332	0.000181607	0.00242011
SNRPD2	3570.68	-0.631136	0.151666	-4.16137	3.16e-05	0.000709944
RPL10	9130.28	-0.626116	0.174999	-3.57782	0.00034647	0.00389487
MRPS25	897.509	-0.62501	0.163936	-3.81251	0.000137561	0.00199698
SERGEF	241.732	-0.61949	0.124943	-4.95817	7.12e-07	5.36e-05
RPL11	15813.6	-0.599133	0.154619	-3.87489	0.000106673	0.00166554
TMSB10	20757.6	-0.58086	0.172027	-3.37656	0.000733988	0.00652335
PLEKHF1	423.286	-0.576753	0.248445	-2.32145	0.0202625	0.0670099
CDC42EP5	106.055	-0.572145	0.242327	-2.36105	0.0182235	0.0620632
NDUFS6	1766.36	-0.563741	0.184456	-3.05623	0.00224136	0.0141371
RPS14	13615.8	-0.559819	0.167357	-3.34505	0.000822665	0.00707484
DHRS7	878.457	-0.535714	0.190065	-2.81859	0.00482353	0.0240455
RPL29	8017.34	-0.52418	0.193319	-2.71148	0.00669834	0.0303845
RPL5	14685.4	-0.519438	0.144044	-3.6061	0.000310831	0.00360373
GRTP1	373.629	-0.515556	0.172212	-2.99373	0.00275589	0.0163607
ITGB3BP	322.313	-0.513659	0.138102	-3.71941	0.000199692	0.00258936
ARHGAP25	405.347	-0.507249	0.232883	-2.17813	0.0293962	0.0879392
C19orf10	1508.58	-0.505603	0.141399	-3.57572	0.000349259	0.00391548
RBM38	1447.58	-0.505373	0.162237	-3.11503	0.00183927	0.0122942
EXOSC4	630.821	-0.501341	0.201514	-2.48788	0.0128509	0.0483325
ELMO1	278.179	-0.497429	0.224493	-2.21579	0.0267061	0.0820882
C9orf3	1791.57	-0.496868	0.19493	-2.54895	0.0108046	0.0426211
DUSP5	1228.5	-0.494769	0.230503	-2.14647	0.0318351	0.0930343
RPL35	10852	-0.494114	0.188513	-2.62111	0.00876442	0.0367556
CST3	3962.46	-0.493373	0.15482	-3.18675	0.00143882	0.01032
DGKD	551.277	-0.490098	0.192698	-2.54334	0.0109797	0.0431355
ZNF251	289.226	-0.489937	0.174256	-2.81159	0.00492977	0.0244158
SMYD3	188.898	-0.488939	0.18216	-2.68411	0.00727221	0.0321447
BIN3	569.186	-0.487523	0.131364	-3.71123	0.000206255	0.00264824
RPL10A	8713.85	-0.484744	0.136298	-3.55649	0.000375836	0.004114
ZP3	287.046	-0.478281	0.202825	-2.35809	0.0183691	0.0623468
KLHDC4	305.626	-0.471772	0.146936	-3.21073	0.00132398	0.00977263
PRR3	226.844	-0.469269	0.143159	-3.27797	0.00104556	0.00830531
GPX1	4947.7	-0.465494	0.169222	-2.75079	0.00594516	0.0280214
TOP1MT	680.791	-0.464173	0.202387	-2.29349	0.0218196	0.07077
C2CD2	915.436	-0.456066	0.212386	-2.14734	0.0317661	0.0929065
POLE4	749.581	-0.451832	0.159955	-2.82475	0.00473181	0.0237562
CAPG	5150.69	-0.451323	0.151203	-2.98488	0.00283691	0.016663
PPIB	7549.29	-0.449065	0.131221	-3.42221	0.000621144	0.00579281
RPS23	11303.5	-0.446696	0.164514	-2.71525	0.00662259	0.0301303
PRDX4	1652.4	-0.444151	0.170548	-2.60426	0.00920732	0.0380434
LENG9	236.045	-0.441953	0.165487	-2.67062	0.00757119	0.033107
EEF1G	12808.2	-0.441733	0.155202	-2.84619	0.00442463	0.0226925
ALDH1B1	644.385	-0.441238	0.195792	-2.25361	0.024221	0.0763833
NAT9	437.786	-0.438809	0.136303	-3.21936	0.00128477	0.00956406
SYNGR2	6523	-0.437736	0.161356	-2.71286	0.00667048	0.0302956
TRAF4	1896.43	-0.430802	0.139425	-3.08985	0.00200255	0.0130063
NDUFS4	779.385	-0.42255	0.160281	-2.63632	0.00838112	0.0356373
PLEKHO2	932.904	-0.421962	0.165767	-2.54552	0.0109116	0.0429229
PMVK	1472.38	-0.414673	0.16264	-2.54963	0.0107836	0.0425474
ATP5G2	4397.5	-0.414642	0.120079	-3.45307	0.000554243	0.00534676
AKR1A1	3171	-0.403654	0.132972	-3.03564	0.00240026	0.0148078
POMGNT1	1537.54	-0.402942	0.0977787	-4.12096	3.77e-05	0.000801979
RPL35A	14085.6	-0.402107	0.16342	-2.46057	0.0138716	0.0510818
DGUOK	795.811	-0.401423	0.114386	-3.50937	0.000449172	0.0046086
RPL3	27984.4	-0.401376	0.136736	-2.9354	0.00333114	0.0185812
CSRP1	3838.17	-0.399951	0.117529	-3.40301	0.000666489	0.0060857
IMP3	1487.91	-0.397064	0.120645	-3.29118	0.000997695	0.00804784
LRPAP1	2281.02	-0.395758	0.127375	-3.10703	0.00188977	0.0124861
GET4	908.924	-0.394733	0.13165	-2.99835	0.00271446	0.0161852
NSMCE1	865.193	-0.39451	0.134244	-2.93876	0.00329527	0.018471
DAD1	2199.55	-0.3888	0.121226	-3.20723	0.0013402	0.00984872
TNIP2	983.332	-0.387677	0.133676	-2.90013	0.00373008	0.0200325
PEMT	315.647	-0.386256	0.151964	-2.54176	0.0110296	0.0432313
PRDX5	4804.28	-0.385615	0.166669	-2.31366	0.0206862	0.0680446
RAB11FIP3	611.129	-0.381847	0.176005	-2.16952	0.0300429	0.0893055
ALG5	443.636	-0.377184	0.12432	-3.03398	0.00241348	0.0148639
TPT1	37261.8	-0.374146	0.140723	-2.65874	0.00784344	0.0339654
SLC25A33	165.211	-0.372711	0.167157	-2.2297	0.0257672	0.0798987
ADPGK	1137.89	-0.371907	0.0918038	-4.05111	5.1e-05	0.000974598
CRYL1	258.372	-0.368307	0.172048	-2.14072	0.0322963	0.0939476
HRAS	1406.79	-0.366523	0.159231	-2.30184	0.0213444	0.0696843
MFSD10	1422.6	-0.365958	0.14709	-2.48799	0.0128468	0.0483305
ZBTB49	89.0994	-0.356593	0.108719	-3.27997	0.00103819	0.00827426
MGST2	939.512	-0.354609	0.148879	-2.38186	0.0172253	0.0596972
CARS	1406.04	-0.351023	0.144809	-2.42404	0.0153488	0.0549398
ANAPC4	470.932	-0.348006	0.103961	-3.34748	0.000815498	0.007033
MMAB	786.004	-0.347586	0.148179	-2.34571	0.0189908	0.0639833
ATP5O	3516.96	-0.347234	0.146253	-2.37419	0.0175873	0.060573
RPLP0	22069.2	-0.347164	0.156594	-2.21697	0.0266249	0.0819622
TMEM216	287.684	-0.340765	0.124959	-2.72702	0.00639095	0.0293809
RELT	384.662	-0.338288	0.127037	-2.66291	0.00774679	0.0336581
SGSM3	1264.41	-0.338156	0.101613	-3.32788	0.000875081	0.00737152
C12orf44	1256.88	-0.337833	0.126605	-2.6684	0.00762131	0.0332582
TARBP2	553.357	-0.33679	0.114826	-2.93304	0.00335662	0.0186735
PTMA	21525.5	-0.334722	0.126965	-2.63634	0.00838061	0.0356373
CREG1	2097.1	-0.333186	0.123539	-2.69702	0.0069964	0.0312319
SNRPB	6454	-0.326004	0.149093	-2.18658	0.0287732	0.0866835
GLT8D1	673.333	-0.321688	0.121786	-2.64143	0.0082558	0.0352844
NOD1	267.088	-0.311675	0.0974628	-3.19788	0.0013844	0.010013
CALM3	4957.59	-0.308175	0.10534	-2.92553	0.00343872	0.0189665
NXT1	617.408	-0.304832	0.144612	-2.10793	0.0350374	0.0996605
AK2	3297	-0.303505	0.101498	-2.99024	0.00278755	0.0164929
TRIM27	1104.29	-0.303477	0.0985885	-3.07822	0.00208243	0.0133923
PDCL3	471.863	-0.303404	0.120992	-2.50763	0.0121542	0.046446
ZBTB48	456.455	-0.30122	0.131202	-2.29585	0.0216846	0.0704441
MAD1L1	684.578	-0.299829	0.130854	-2.29132	0.021945	0.0710257
HM13	3619.48	-0.296105	0.134558	-2.20058	0.0277661	0.0845105
NUPL2	429.051	-0.29602	0.0923978	-3.20375	0.00135649	0.00990325
POLR1D	2140.24	-0.294444	0.123971	-2.3751	0.0175442	0.0604911
PACRGL	179.166	-0.291391	0.121318	-2.40188	0.0163112	0.0573677
ZNF696	196.691	-0.285103	0.126893	-2.24681	0.0246522	0.0773476
PPIA	5387.27	-0.279326	0.118209	-2.36299	0.0181281	0.0618265
ACBD6	551.881	-0.265606	0.10765	-2.46731	0.0136133	0.0503143
PPA2	1021.19	-0.258791	0.107164	-2.41491	0.0157392	0.0558285
BRE	506.315	-0.245328	0.107879	-2.27409	0.0229605	0.0734937
PSMD9	1285.03	-0.24417	0.109158	-2.23685	0.0252961	0.0788245
UBE2G2	1277.28	-0.229361	0.105866	-2.16653	0.030271	0.0898234
IKBKB	1096.78	-0.225428	0.0984928	-2.28877	0.0220925	0.0713523
ALG6	465.673	-0.208498	0.0935761	-2.22811	0.0258733	0.0801872
E2F6	384.163	-0.207037	0.0826779	-2.50414	0.012275	0.0467515
ZNF2	117.301	-0.199208	0.0786185	-2.53385	0.0112816	0.0439356
IPO9	2492.59	0.20243	0.0829977	2.43898	0.0147287	0.0532645
RAB14	3503.49	0.205736	0.0894547	2.29989	0.0214542	0.0699187
LASP1	5632.51	0.208224	0.0928362	2.24292	0.0249022	0.0779312
SP1	3451.01	0.224963	0.104592	2.15088	0.031486	0.092264
PACS1	2839.35	0.230958	0.0899047	2.56892	0.0102015	0.0408752
PUM2	3470.39	0.231501	0.0854117	2.71041	0.00671993	0.0304372
ANKRD13C	542.128	0.231573	0.0821165	2.82005	0.00480161	0.0239769
ABL1	2072.16	0.246825	0.116158	2.12491	0.0335937	0.096694
ESYT2	2291.11	0.250486	0.118117	2.12065	0.0339509	0.0973097
MEX3C	1018.47	0.252804	0.115241	2.19369	0.0282576	0.0855944
ATP6V1C1	1356.57	0.256968	0.0805608	3.18974	0.00142402	0.0102367
CHD2	1934.9	0.260511	0.0977624	2.66473	0.00770496	0.033532
IBTK	830.457	0.261873	0.113979	2.29756	0.0215868	0.070201
CDV3	4526.42	0.262445	0.103828	2.52769	0.0114817	0.044488
NSF	1058.08	0.265127	0.111312	2.38183	0.017227	0.0596972
C6orf106	4230.78	0.266429	0.114546	2.32595	0.0200211	0.0664531
RBMS1	1167.46	0.266626	0.123907	2.15183	0.0314107	0.0920727
SEC61A1	10037.4	0.271369	0.107579	2.52252	0.0116517	0.0450041
RRM1	3781.17	0.273906	0.125835	2.17671	0.0295023	0.0881848
RBM7	370.621	0.274574	0.10461	2.62473	0.00867165	0.0364918
XPO6	2221.76	0.277484	0.0908136	3.05553	0.00224664	0.014162
CTDSP2	5249.82	0.280404	0.128377	2.18423	0.0289453	0.087059
ADAR	8139.31	0.282514	0.0991759	2.84861	0.00439102	0.0225769
TPD52	2728.89	0.28606	0.135496	2.1112	0.034755	0.09898
AP1B1	3851.16	0.287275	0.083897	3.42413	0.000616764	0.00576076
PPP1CB	7194.42	0.288283	0.103639	2.78161	0.00540904	0.0261675
AP4E1	437.902	0.29031	0.132654	2.18848	0.0286349	0.0863883
TSC1	817.446	0.293474	0.108653	2.70102	0.0069128	0.0309387
ERBB2IP	2006	0.29379	0.121149	2.42502	0.0153074	0.0548487
FKBP15	1365.6	0.295931	0.116608	2.53783	0.0111541	0.0435408
UBE4B	1727.13	0.296635	0.121226	2.44695	0.0144069	0.0524502
SEC63	1563.18	0.296799	0.101048	2.93722	0.00331168	0.018529
GOPC	856.539	0.296929	0.112212	2.64615	0.00814141	0.0349585
MEF2A	1109.15	0.300839	0.139623	2.15465	0.031189	0.0916575
ANKFY1	1783.58	0.303539	0.122687	2.47408	0.0133578	0.0496256
CASK	1186.63	0.304306	0.136296	2.23269	0.0255694	0.079487
TARS	2692.63	0.304437	0.128091	2.37673	0.0174667	0.0603114
SNX27	827.894	0.304571	0.0925201	3.29194	0.000994979	0.00804008
KDM2A	3899.18	0.304628	0.102326	2.97704	0.00291042	0.0169513
KIAA1429	1415.72	0.305525	0.114487	2.66864	0.00761595	0.0332473
CYB5B	1495.36	0.305714	0.120375	2.53967	0.0110956	0.0433678
HTT	2392.52	0.306465	0.118852	2.57855	0.00992168	0.0401399
LIMK1	1303.49	0.309225	0.114426	2.70241	0.00688381	0.0308649
TAB2	1910.34	0.310481	0.137925	2.25108	0.0243806	0.0767545
PAFAH1B1	3406.78	0.311313	0.0963043	3.2326	0.0012267	0.00925961
2021-09-02	6294.5	0.311844	0.0960257	3.2475	0.00116423	0.00891278
MAP4K3	490.857	0.313051	0.100728	3.1079	0.00188424	0.012472
SAP130	908.74	0.31337	0.0833048	3.76173	0.000168743	0.0023245
ACTN4	14212.6	0.318007	0.107463	2.95923	0.00308412	0.0176714
AMFR	1802.15	0.318372	0.11884	2.679	0.00738419	0.0324674
ASAP1	1171.56	0.319976	0.13707	2.3344	0.0195749	0.0653652
OSBPL9	1158.59	0.321403	0.104741	3.06855	0.00215098	0.0137298
PLEKHG3	1884.18	0.322549	0.142755	2.25946	0.0238551	0.0755411
CAPRIN1	5972.6	0.324101	0.118983	2.72393	0.006451	0.0295774
ZMYND8	806.282	0.324242	0.137712	2.35449	0.018548	0.0627912
PPP3CA	1197.42	0.327816	0.13137	2.49537	0.0125825	0.0475823
TANC1	1283.33	0.331522	0.153215	2.16377	0.0304819	0.0902323
MKLN1	1056.02	0.332545	0.102527	3.24349	0.00118077	0.00900931
MON2	904.64	0.336043	0.112259	2.99347	0.00275824	0.0163664
TCF20	2213.33	0.337312	0.118647	2.84299	0.00446925	0.0228425
ARFGEF1	1702.91	0.339197	0.105882	3.20353	0.00135755	0.00990325
NFATC3	833.678	0.341784	0.122751	2.78437	0.00536324	0.0259939
OTUD7B	697.82	0.34219	0.120017	2.85117	0.00435587	0.0224466
TNKS2	1579.05	0.342455	0.137728	2.48646	0.0129022	0.0484005
RICTOR	852.467	0.345853	0.149092	2.31973	0.0203555	0.0672706
NFAT5	1088.07	0.350925	0.153502	2.28612	0.0222472	0.0717001
BCOR	979.023	0.351388	0.146885	2.39227	0.0167446	0.0585231
ATP2C1	4053.33	0.354097	0.117272	3.01946	0.00253229	0.0153944
GNAQ	1195.85	0.354227	0.124228	2.85143	0.00435229	0.0224344
ACBD5	659.239	0.356612	0.131038	2.72143	0.00649998	0.0297388
RAB3GAP2	920.115	0.360045	0.11513	3.12728	0.00176429	0.0119455
DHX8	1442.23	0.361074	0.0868794	4.15603	3.24e-05	0.000720538
MTDH	3197.37	0.361533	0.0991573	3.64606	0.000266295	0.00322278
ZBTB44	965.716	0.365574	0.142118	2.57233	0.0101015	0.0406166
RMI1	638.97	0.369183	0.144732	2.5508	0.0107476	0.0424236
KIAA0247	2427.46	0.370676	0.122316	3.03047	0.00244172	0.0149879
GAB1	438.94	0.375564	0.150428	2.49663	0.012538	0.0474574
STIL	745.483	0.379361	0.14323	2.64861	0.0080824	0.0347703
PKN2	1366.1	0.380512	0.114321	3.32846	0.000873275	0.00737152
ZMYM1	277.473	0.380781	0.123347	3.08709	0.00202129	0.0131001
WDR26	2274.72	0.380904	0.110101	3.45959	0.000540993	0.00526772
CHML	567.611	0.382086	0.157616	2.42416	0.0153438	0.0549362
ZNF609	1032.36	0.386095	0.130399	2.96088	0.00306764	0.0176041
USP40	800.146	0.386811	0.139595	2.77096	0.00558918	0.0267356
TBCEL	187.588	0.393314	0.14648	2.6851	0.00725089	0.0320813
PGK1	13944.3	0.396216	0.154129	2.57068	0.01015	0.0407132
KIF5B	3645.38	0.397036	0.12548	3.16415	0.00155539	0.0109014
BRD4	2429	0.399176	0.114921	3.47348	0.000513753	0.00509171
RB1CC1	1667.01	0.400376	0.130828	3.06031	0.00221105	0.0139973
RAI1	1709.86	0.403917	0.134985	2.99231	0.00276877	0.0164183
ARHGAP27	1154.19	0.407008	0.159086	2.55842	0.0105148	0.0417292
PDK1	669.187	0.408751	0.167641	2.43825	0.0147586	0.0532985
IARS	3218.44	0.40935	0.117373	3.48759	0.000487397	0.00488843
LYST	584.945	0.409774	0.152812	2.68156	0.00732797	0.0322744
CHD6	1292.98	0.410705	0.172241	2.38448	0.0171034	0.0594208
EIF5	4299.71	0.412513	0.110866	3.72084	0.000198563	0.00257713
NR3C1	1492.62	0.412999	0.136043	3.0358	0.00239895	0.0148047
ZNF217	1356.91	0.416533	0.159849	2.60578	0.00916642	0.0379297
MED13L	2182.73	0.417991	0.182714	2.28769	0.0221558	0.0714936
STIM1	1797.6	0.419424	0.110386	3.79962	0.00014492	0.00208238
CCDC132	410.943	0.419538	0.104051	4.03206	5.53e-05	0.00103736
SVIL	3106.23	0.423434	0.193732	2.18567	0.0288397	0.0868268
MBNL1	4353.61	0.425958	0.100882	4.22234	2.42e-05	0.000587147
SPTBN1	5197.43	0.428366	0.157625	2.71762	0.00657524	0.0299595
IGF1R	2354.98	0.430155	0.192551	2.23398	0.0254841	0.0792892
SLC25A13	618.934	0.430922	0.113674	3.79086	0.000150126	0.00212793
FOXN3	1541.12	0.43171	0.163671	2.63768	0.0083476	0.0355333
EPHB4	2526.38	0.432864	0.142388	3.04004	0.00236548	0.0146821
SPIN1	2070.4	0.433188	0.122544	3.53496	0.000407842	0.00432742
BMP2K	420.132	0.436346	0.203881	2.1402	0.0323383	0.094023
HIATL1	2023.69	0.436539	0.113658	3.8408	0.000122635	0.00185215
WDR44	479.337	0.437	0.151738	2.87996	0.00397726	0.0210374
TBL1XR1	4408.35	0.440113	0.137214	3.20749	0.001339	0.00984384
ELF1	1535.58	0.440522	0.156279	2.81882	0.00482005	0.0240412
LRRC16A	770.286	0.440857	0.167009	2.63973	0.00829727	0.0353874
USP9X	3291.76	0.442931	0.165886	2.67009	0.00758302	0.0331351
BBX	1491.93	0.445749	0.158065	2.82003	0.00480192	0.0239769
PAWR	349.459	0.448142	0.133598	3.35441	0.000795351	0.00691454
HELZ	1220.27	0.450138	0.150991	2.98122	0.00287098	0.0168016
ARAP2	999.053	0.450499	0.174025	2.5887	0.0096339	0.039236
2021-03-07	1786.78	0.450591	0.103162	4.3678	1.26e-05	0.000381018
CBLB	547.474	0.450921	0.164007	2.7494	0.00597045	0.0280688
ERBB3	2384.88	0.451534	0.184499	2.44736	0.0143909	0.0524148
RSF1	640.305	0.453511	0.16801	2.69931	0.00694826	0.0310647
MAPK1	3230.92	0.453624	0.0982814	4.61557	3.92e-06	0.000171655
FAM102A	2755.46	0.454666	0.134894	3.37055	0.000750178	0.00664149
UBR5	2579.23	0.456041	0.132182	3.45009	0.000560397	0.0053829
WDFY3	890.167	0.457308	0.166639	2.7443	0.00606399	0.028327
TES	1573.14	0.457719	0.130921	3.49616	0.00047201	0.00477386
SLC12A2	758.613	0.459567	0.212392	2.16376	0.0304826	0.0902323
TJP2	2994.64	0.461005	0.156609	2.94367	0.00324347	0.0182869
YEATS2	1992.29	0.469023	0.145684	3.21945	0.00128436	0.00956406
CPEB2	434.288	0.474104	0.214093	2.21447	0.0267964	0.0822556
FLNA	25819.5	0.474256	0.194592	2.43718	0.0148021	0.0533833
ITPR3	5366.3	0.475392	0.190468	2.49591	0.0125634	0.047544
NIPBL	2192.89	0.480294	0.140876	3.40934	0.000651197	0.00598481
ANTXR1	2137.57	0.482195	0.207578	2.32296	0.0201815	0.0668173
TULP4	844.126	0.482514	0.136747	3.52851	0.000417909	0.00439608
KLF10	1892.65	0.482864	0.227356	2.12382	0.0336851	0.0968428
ASH1L	1675.97	0.483187	0.16188	2.98484	0.0028373	0.016663
BCL6	1676.81	0.483233	0.172025	2.80908	0.00496828	0.024558
AHR	1929.43	0.484472	0.193722	2.50086	0.0123893	0.0470305
APOOL	127.788	0.48503	0.224778	2.15782	0.0309418	0.0911356
ATF7IP	1097.49	0.487267	0.169161	2.88049	0.0039706	0.0210104
ZNFX1	1908.87	0.487413	0.154933	3.14596	0.00165545	0.0113979
PIM1	1993.14	0.489185	0.215153	2.27366	0.0229863	0.0734942
IGF2R	4294.68	0.489917	0.16499	2.96938	0.00298404	0.0172649
PEX26	474.701	0.490346	0.127429	3.84799	0.00011909	0.00180606
C1orf106	2327.45	0.494758	0.228576	2.16452	0.0304245	0.0901186
PHC3	1540.02	0.496703	0.171126	2.90256	0.00370128	0.0199187
TIAM1	1161.51	0.497343	0.160717	3.09452	0.00197132	0.012849
AGPS	1216.28	0.497986	0.121898	4.08528	4.4e-05	0.000891903
ESRP1	3308.6	0.501115	0.120511	4.15825	3.21e-05	0.0007162
KIF13A	1052.67	0.501219	0.207802	2.412	0.0158652	0.0561126
PJA2	2309.2	0.503819	0.149563	3.3686	0.000755512	0.0066726
PLSCR1	2386.13	0.508394	0.188036	2.70371	0.00685707	0.0308072
NCKAP1	3791.84	0.511395	0.14258	3.58671	0.000334875	0.00379242
DLG1	2197.58	0.512405	0.13667	3.74922	0.000177382	0.00238789
MSI2	254.084	0.513302	0.172445	2.97662	0.00291446	0.0169586
ARHGAP5	1964.82	0.517208	0.147456	3.50754	0.000452271	0.00463003
BPGM	785.157	0.517249	0.169696	3.04809	0.002303	0.0144065
TMEM2	960.459	0.518311	0.196149	2.64243	0.00823137	0.0352457
TNRC6B	984.256	0.523425	0.126981	4.12209	3.75e-05	0.000801275
PLEKHA7	567.96	0.523948	0.206534	2.53686	0.0111852	0.0436377
ZHX3	509.319	0.526785	0.150756	3.49428	0.000475337	0.00479918
CAMSAP1	2047.78	0.52789	0.118132	4.46864	7.87e-06	0.00027702
GTF2I	2434.74	0.530488	0.177407	2.99023	0.00278764	0.0164929
MKL2	1108.5	0.532198	0.145145	3.66667	0.000245732	0.00302835
PHLPP1	823.072	0.534954	0.116159	4.60536	4.12e-06	0.000175978
HLTF	1954.5	0.53678	0.166698	3.22007	0.0012816	0.00955594
CCL28	73.2331	0.537089	0.184517	2.91078	0.00360532	0.0195325
CLOCK	409.77	0.537794	0.233722	2.301	0.0213917	0.0697771
HSPG2	9649.75	0.538022	0.232287	2.31619	0.0205479	0.067687
PAK2	3744.18	0.5381	0.121249	4.43798	9.08e-06	0.000306055
PHACTR2	624.173	0.538207	0.186081	2.89233	0.00382401	0.0204203
NRP1	994.391	0.539874	0.220189	2.45187	0.0142118	0.0520313
MFSD1	1931.96	0.542552	0.151472	3.58187	0.000341148	0.00384683
IDE	513.823	0.543012	0.195519	2.77728	0.00548161	0.0263876
CHD9	954.635	0.548852	0.171018	3.20932	0.00133049	0.00980489
ARHGAP24	329.933	0.550495	0.237845	2.31451	0.0206397	0.0679528
YAP1	2187.64	0.553967	0.179695	3.08282	0.00205046	0.0132517
ATP2B1	1232.75	0.554927	0.168769	3.28809	0.00100868	0.00810083
POLQ	606.469	0.56132	0.192871	2.91034	0.00361036	0.0195499
CDC42BPB	2911.95	0.561841	0.164455	3.41638	0.000634593	0.00586454
PPL	9482.84	0.562488	0.243413	2.31084	0.0208419	0.0684464
RALGPS2	551.161	0.564845	0.226204	2.49706	0.0125228	0.0474197
DENND1B	111.047	0.565057	0.214728	2.6315	0.00850097	0.03598
MAP3K2	684.062	0.57	0.175797	3.24237	0.00118538	0.00902391
FRK	167.383	0.570593	0.252619	2.25871	0.0239012	0.075635
DCBLD1	450.082	0.571087	0.193441	2.95225	0.00315469	0.0179297
MICALL1	3243.83	0.575394	0.16658	3.45415	0.000552027	0.0053383
HIVEP2	1252.68	0.575913	0.175472	3.28208	0.00103044	0.00822511
DNAJC13	1985.22	0.576652	0.145443	3.96479	7.35e-05	0.00128154
TJP1	2624.25	0.577785	0.166483	3.47055	0.0005194	0.00513657
KLF3	2896	0.578777	0.139827	4.13923	3.48e-05	0.000757013
ZDBF2	237.316	0.57938	0.261011	2.21975	0.0264356	0.0815813
RASAL2	751.662	0.581368	0.196443	2.95947	0.00308173	0.0176684
TRIO	1396.95	0.581781	0.20179	2.88311	0.00393774	0.0208908
GLI3	659.925	0.582169	0.227358	2.56058	0.0104499	0.0415255
TBC1D2	1868.31	0.585249	0.198155	2.95349	0.00314206	0.0178856
PITPNM3	800.949	0.585541	0.207655	2.81978	0.00480564	0.023989
INCENP	1005.72	0.589837	0.142207	4.14775	3.36e-05	0.000738145
NRP2	1220.16	0.593921	0.229769	2.58486	0.00974176	0.0395604
EXPH5	358.53	0.594149	0.198378	2.99504	0.00274408	0.0163194
NACC2	73.555	0.595457	0.198563	2.99883	0.00271022	0.016181
EIF2AK2	659.572	0.602083	0.187933	3.20371	0.00135668	0.00990325
NEK7	1054.21	0.604573	0.166015	3.64168	0.000270862	0.00325923
DHX36	1344.05	0.608145	0.133393	4.55904	5.14e-06	0.00020527
SH3BP4	1589.26	0.612813	0.143068	4.28336	1.84e-05	0.000491751
ZFHX3	527.694	0.620213	0.190459	3.25641	0.00112829	0.00873248
GMPS	2623.5	0.621187	0.125471	4.95084	7.39e-07	5.46e-05
UGCG	488.047	0.625474	0.251485	2.48712	0.0128781	0.0483654
ZMAT3	164.43	0.628922	0.247611	2.53996	0.0110867	0.0433444
MYOF	3779.83	0.62907	0.22155	2.83941	0.00451976	0.0230194
GALNT7	773.433	0.630871	0.24788	2.54507	0.0109256	0.0429598
ZCCHC14	1010.01	0.632014	0.147157	4.29482	1.75e-05	0.000474904
PAK6	873.394	0.633105	0.179577	3.52553	0.000422638	0.00443311
OAS3	4531.79	0.634902	0.223236	2.84408	0.00445403	0.0227986
MALL	4153.48	0.637365	0.226839	2.80977	0.00495768	0.0245272
EPB41L1	1722.75	0.637725	0.218126	2.92366	0.00345947	0.0190272
TLE4	864.351	0.640372	0.156645	4.08805	4.35e-05	0.000884274
TGFBR3	222.059	0.64155	0.249946	2.56676	0.0102654	0.0410592
PPP2R5E	761.644	0.642174	0.143841	4.46448	8.03e-06	0.000280892
PCDH18	112.247	0.644025	0.28084	2.29321	0.021836	0.0707729
STXBP5	398.662	0.655619	0.224413	2.92149	0.00348367	0.0191179
C10orf12	154.9	0.658145	0.190961	3.44649	0.000567929	0.00544327
NRIP1	1377.44	0.659034	0.204551	3.22185	0.00127366	0.0095006
SLC38A2	7858.75	0.659058	0.160584	4.10413	4.06e-05	0.000842469
RORA	538.352	0.66037	0.217419	3.03732	0.00238694	0.0147455
PTPRK	1772.79	0.661047	0.154084	4.29016	1.79e-05	0.000480922
ANKRD50	751.333	0.666964	0.202356	3.296	0.000980723	0.00798825
SNX30	593.931	0.67468	0.13795	4.89076	1e-06	6.75e-05
MYH9	32373.7	0.678343	0.139726	4.8548	1.21e-06	7.73e-05
ZNF827	233.762	0.686275	0.272708	2.51652	0.0118521	0.045567
RNF11	2143.03	0.696982	0.137233	5.07881	3.8e-07	3.53e-05
MXRA5	2498.56	0.698558	0.327418	2.13354	0.0328806	0.0951043
STT3B	1379.29	0.704661	0.171635	4.10559	4.03e-05	0.000840656
TRPS1	677.815	0.706523	0.266998	2.64617	0.00814083	0.0349585
EHF	4156.2	0.708172	0.261487	2.70825	0.00676399	0.0305237
ASCC3	1527.57	0.710959	0.165722	4.29006	1.79e-05	0.000480922
NOS1AP	57.2134	0.716004	0.280324	2.5542	0.0106433	0.0421023
RHOD	919.628	0.72125	0.293437	2.45794	0.0139736	0.0513132
WNT7B	1314.09	0.724701	0.224781	3.22403	0.00126399	0.00945541
PLK2	1253.81	0.727809	0.248648	2.92706	0.00342181	0.018903
SNAPC1	341.778	0.731859	0.16922	4.32489	1.53e-05	0.00043313
BCAT1	363.185	0.74092	0.286302	2.5879	0.00965637	0.0392919
LPP	387.868	0.742392	0.250319	2.96579	0.00301911	0.0174128
ZNF462	362.1	0.75018	0.285496	2.62763	0.00859811	0.0362655
OAS2	3434.79	0.757579	0.28186	2.68779	0.00719267	0.0318622
CCRN4L	174.287	0.767213	0.218451	3.51205	0.000444657	0.00456739
SOX6	256.375	0.770992	0.312972	2.46345	0.0137607	0.0507448
ELL2	2033.67	0.77675	0.179065	4.33781	1.44e-05	0.00041618
ARSJ	227.361	0.781612	0.316412	2.47024	0.0135023	0.049993
ATP10D	845.083	0.784455	0.188018	4.17224	3.02e-05	0.000682743
COL5A2	3186.18	0.788268	0.306182	2.5745	0.0100384	0.0404336
TFPI	416.841	0.789242	0.314135	2.51243	0.0119902	0.0459627
VGLL3	108.986	0.79643	0.326783	2.43718	0.0148023	0.0533833
FAM135A	869.623	0.801035	0.190236	4.21076	2.55e-05	0.00060684
TRERF1	658.222	0.80335	0.171096	4.69531	2.66e-06	0.000131208
SLC38A7	255.993	0.804519	0.179493	4.48217	7.39e-06	0.000263779
TANC2	1108.56	0.809351	0.195328	4.14354	3.42e-05	0.000749126
ADAMTS2	368.707	0.82304	0.352347	2.33588	0.0194976	0.0651875
DPP4	109.119	0.8244	0.336764	2.44801	0.0143648	0.0523304
DIO2	1003.34	0.824769	0.359781	2.29242	0.0218816	0.0708707
PLAT	2969.17	0.827271	0.384424	2.15198	0.0313992	0.0920537
SEMA3C	846.14	0.833785	0.370541	2.25019	0.0244371	0.0768334
DAAM1	606.981	0.835799	0.226464	3.69065	0.000223679	0.0028148
NCOA2	652.612	0.842147	0.307478	2.73889	0.00616472	0.0286423
LMBRD2	161.051	0.855237	0.227917	3.7524	0.000175148	0.002377
NCKAP5	143.327	0.865402	0.307498	2.81434	0.00488778	0.0242668
GTF2A1	197.63	0.870342	0.267803	3.24994	0.0011543	0.0088668
MYLK	1029.72	0.881394	0.302461	2.91407	0.00356746	0.0194093
FRMD6	2596.33	0.883697	0.196069	4.50707	6.57e-06	0.000241516
PRICKLE1	175.052	0.897947	0.306106	2.93345	0.00335214	0.0186699
ZDHHC20	308.079	0.898803	0.309651	2.90264	0.00370037	0.0199187
REL	163.308	0.899497	0.292252	3.07781	0.00208528	0.0134012
SSFA2	2562.69	0.912217	0.202227	4.51085	6.46e-06	0.000239036
SERTAD4	136.024	0.919297	0.312405	2.94265	0.00325417	0.0183191
CD109	2346.18	0.923028	0.219874	4.19799	2.69e-05	0.000633824
PFN2	2022.71	0.938531	0.320727	2.92626	0.0034306	0.0189448
ISPD	26.7764	0.93939	0.283051	3.31879	0.00090407	0.00752776
INHBA	199.966	0.954539	0.419614	2.2748	0.0229178	0.0733842
UBXN7	699.476	0.959047	0.233826	4.10154	4.1e-05	0.000849001
BDNF	50.583	0.963609	0.342447	2.81389	0.00489461	0.0242942
TSC22D2	679.246	0.974275	0.197513	4.93271	8.11e-07	5.72e-05
ABAT	290.9	0.985955	0.312179	3.1583	0.00158691	0.0110547
SLC16A7	67.9898	1.00679	0.443175	2.27177	0.0231002	0.0737699
SIPA1L2	1070.67	1.03427	0.236471	4.37378	1.22e-05	0.000375662
SLC28A3	155.104	1.04022	0.362291	2.87123	0.00408881	0.0214747
ABCA12	580.062	1.04273	0.378487	2.75499	0.00586934	0.02775
NFKBIZ	1234.64	1.05142	0.293922	3.5772	0.00034729	0.00390169
HIF1A	4994.45	1.05516	0.204106	5.16965	2.35e-07	2.44e-05
PCSK5	145.693	1.06321	0.404387	2.6292	0.00855869	0.0361325
DDX60	1478.42	1.10807	0.295974	3.74381	0.000181249	0.00241864
MME	143.271	1.11329	0.411109	2.70802	0.00676864	0.0305372
MFHAS1	841.429	1.12572	0.213103	5.28254	1.27e-07	1.59e-05
EXOC6B	278.356	1.1269	0.247159	4.55942	5.13e-06	0.00020527
PPP2R3A	870.827	1.2003	0.245283	4.89353	9.9e-07	6.7e-05
RNF168	661.767	1.20581	0.249408	4.83466	1.33e-06	8.21e-05
ABCC5	4027.9	1.2279	0.248513	4.94099	7.77e-07	5.61e-05
IGF2BP3	696.423	1.31008	0.354935	3.69103	0.000223351	0.0028126
B4GALT4	1854.48	1.38872	0.289845	4.79124	1.66e-06	9.35e-05
SAMD9	2593.04	1.40124	0.317198	4.41755	9.98e-06	0.000328013
EDIL3	111.489	1.44795	0.436731	3.31543	0.000915027	0.00758454
IGF2BP2	924.143	1.5097	0.423725	3.56292	0.000366753	0.00404842
CGB8	0.897477	1.52829	0.725256	2.10725	0.0350961	0.0997963
SYT1	58.1704	1.66693	0.473926	3.51727	0.000436002	0.00451134
PHLDB2	1185.95	1.75229	0.291781	6.00548	1.91e-09	8.52e-07
PCDH10	12.912	1.768	0.733542	2.41023	0.0159425	0.0563316
GABRA3	24.4863	1.83535	0.467674	3.92443	8.69e-05	0.00143823
TM4SF19	94.4723	1.99899	0.448499	4.45706	8.31e-06	0.000288286
NPR3	104.039	2.00106	0.429957	4.65411	3.25e-06	0.000150656
FIBCD1	22.0107	2.36104	0.575036	4.1059	4.03e-05	0.000840656
GPR1	80.2475	2.49746	0.446753	5.59025	2.27e-08	4.89e-06
CDH18	1.30248	3.09408	1.28191	2.41365	0.0157934	0.0559669
NEFM	139.695	4.03811	0.734649	5.49665	3.87e-08	7.03e-06

## Sheet: TCGA_104sh2_indirect
	baseMean	log2FoldChange	lfcSE	stat	pvalue	padj
TTN	1030.27	-2.89039	0.520848	-5.54941	2.87e-08	5.77e-06
HIST1H3I	0.659513	-1.82044	0.730957	-2.49049	0.0127566	0.0480586
COX6B2	137.104	-1.6765	0.424935	-3.94532	7.97e-05	0.00136052
MAPK15	28.6494	-1.57507	0.405846	-3.88095	0.00010405	0.00163196
RPS27	107.878	-1.39818	0.24455	-5.71736	1.08e-08	2.81e-06
IL32	3895.56	-1.37331	0.228723	-6.00426	1.92e-09	8.52e-07
CCDC78	42.4516	-1.17412	0.360816	-3.25407	0.00113763	0.00877511
RPL39	553.693	-1.13336	0.261022	-4.34201	1.41e-05	0.000411544
DHDH	36.6324	-1.12942	0.290489	-3.88799	0.000101079	0.00160171
SCARNA2	6.03972	-1.12201	0.442836	-2.5337	0.0112867	0.0439365
LPAL2	4.95481	-1.07032	0.354365	-3.0204	0.00252438	0.0153667
RMRP	26.1213	-1.06115	0.433229	-2.44939	0.0143099	0.0522157
COL9A2	729.463	-1.03482	0.338112	-3.06057	0.00220917	0.0139944
CYP2E1	269.126	-1.00888	0.416634	-2.42149	0.015457	0.0551798
RELB	1571.51	-1.00093	0.244923	-4.08672	4.38e-05	0.000887381
MYEF2	61.8461	-0.983988	0.412579	-2.38497	0.0170806	0.0593886
SNHG8	511.936	-0.969432	0.201818	-4.80348	1.56e-06	9.03e-05
NOXO1	110.838	-0.951145	0.443715	-2.1436	0.0320652	0.093513
ATP5I	1747.15	-0.949951	0.201164	-4.72228	2.33e-06	0.000120115
ADAM11	12.883	-0.93777	0.299969	-3.12623	0.00177066	0.0119797
RHBDL1	67.8543	-0.934733	0.30448	-3.06993	0.0021411	0.0136975
RPS29	5807.74	-0.932802	0.212289	-4.39402	1.11e-05	0.000356675
SNHG3	88.4799	-0.910281	0.268693	-3.38781	0.000704523	0.00634139
MCOLN2	79.1687	-0.900366	0.257021	-3.50309	0.000459895	0.00468714
CHKA	322.114	-0.894814	0.202014	-4.42947	9.45e-06	0.000315926
ANO9	493.195	-0.883089	0.228194	-3.86991	0.000108876	0.00169173
BATF3	52.033	-0.873797	0.217002	-4.02668	5.66e-05	0.0010508
ALDH2	4157.64	-0.862901	0.262137	-3.2918	0.000995491	0.00804067
PYCARD	1139.28	-0.857103	0.216727	-3.95476	7.66e-05	0.0013239
TRAPPC6A	335.769	-0.853836	0.201376	-4.24002	2.24e-05	0.00055673
TSTD1	622.373	-0.84877	0.181538	-4.67543	2.93e-06	0.000141244
RPL34	6729.33	-0.842287	0.160808	-5.23783	1.62e-07	1.89e-05
MIR17HG	35.9517	-0.834254	0.291518	-2.86175	0.00421302	0.0219573
C19orf38	45.1004	-0.830331	0.218745	-3.79588	0.000147121	0.00211068
RPL36	9134.41	-0.82975	0.198546	-4.17914	2.93e-05	0.000669067
FKBP11	627.674	-0.826333	0.199328	-4.14558	3.39e-05	0.000743377
CXCL2	122.656	-0.826031	0.38015	-2.17291	0.0297871	0.0887609
HIST2H2AC	13.2638	-0.820778	0.257961	-3.1818	0.00146365	0.0104339
SERPINF2	215.051	-0.816623	0.283338	-2.88216	0.00394963	0.0209417
ANG	96.6317	-0.814467	0.212082	-3.84034	0.000122864	0.00185255
NME3	452.326	-0.814237	0.192791	-4.22342	2.41e-05	0.000585403
SNHG5	1526.63	-0.788318	0.223318	-3.53002	0.000415523	0.00438103
RPL32	11786.2	-0.786066	0.183737	-4.27822	1.88e-05	0.000496286
NDUFA1	1674.25	-0.782544	0.190995	-4.0972	4.18e-05	0.000861477
RPS27A	4857.88	-0.780549	0.164186	-4.75405	1.99e-06	0.000108474
PDRG1	705.43	-0.779024	0.17984	-4.33177	1.48e-05	0.000423094
MAMDC4	176.085	-0.775764	0.33076	-2.3454	0.0190068	0.0640253
RPL26	7272.79	-0.772392	0.167363	-4.61507	3.93e-06	0.000171655
HMSD	62.2554	-0.770907	0.362933	-2.1241	0.0336614	0.0967976
C7orf41	545.496	-0.770869	0.278888	-2.76409	0.00570826	0.0272059
RPS9	15209	-0.769368	0.161992	-4.74941	2.04e-06	0.000110603
LGALS1	4665.43	-0.766139	0.236466	-3.23995	0.0011955	0.00908587
RPS10	3131.84	-0.753146	0.191297	-3.93705	8.25e-05	0.00140039
CYGB	326.407	-0.751107	0.29489	-2.54707	0.010863	0.042787
RPS6	27787.1	-0.747638	0.183856	-4.06643	4.77e-05	0.000939167
KCNN4	263.68	-0.746841	0.244055	-3.06013	0.00221238	0.0139973
RPL27A	7622.84	-0.743434	0.169551	-4.38472	1.16e-05	0.000367128
RPL23A	2200.21	-0.740866	0.156613	-4.73055	2.24e-06	0.000115973
LAPTM5	4252.78	-0.731372	0.245532	-2.97872	0.00289457	0.0168881
RABAC1	1341.85	-0.727158	0.151514	-4.79929	1.59e-06	9.15e-05
C9orf96	4.84338	-0.718858	0.261546	-2.74849	0.00598701	0.028118
RPL13A	10521.6	-0.71833	0.169453	-4.23912	2.24e-05	0.00055673
RPLP2	11205.9	-0.716662	0.175088	-4.09315	4.26e-05	0.000871806
RPS11	20311.1	-0.715732	0.164954	-4.33897	1.43e-05	0.000414645
ZNF692	425.652	-0.714356	0.180245	-3.96324	7.39e-05	0.00128621
FHAD1	41.7844	-0.711133	0.256551	-2.77189	0.00557317	0.026682
CYBA	2321.33	-0.710877	0.199863	-3.55681	0.000375381	0.00411393
LOC100130872	19.7478	-0.709779	0.272704	-2.60275	0.00924799	0.038151
CUEDC2	909.205	-0.700064	0.144254	-4.853	1.22e-06	7.73e-05
RAB26	74.355	-0.697439	0.314387	-2.21841	0.0265268	0.081784
C8orf59	599.687	-0.693692	0.15882	-4.36778	1.26e-05	0.000381018
COMMD6	997.309	-0.680674	0.142113	-4.78968	1.67e-06	9.37e-05
RPS3A	4318.67	-0.679715	0.164295	-4.13717	3.52e-05	0.000762041
RPL17	2205.06	-0.67349	0.170113	-3.95906	7.52e-05	0.00130275
GRAP	140.811	-0.672202	0.247461	-2.71639	0.00659979	0.0300415
NUDT1	841.192	-0.662623	0.178416	-3.71391	0.000204078	0.00262765
RPS25	3904.29	-0.662435	0.170419	-3.8871	0.000101448	0.00160349
MMP25	106.526	-0.659899	0.242127	-2.72543	0.00642185	0.0294878
RPL8	37997.8	-0.656843	0.196542	-3.342	0.000831779	0.00711318
RPL13	14312.7	-0.656664	0.178813	-3.67234	0.000240335	0.00297935
ZNF22	548.315	-0.654978	0.158223	-4.13959	3.48e-05	0.000756721
CTU1	83.6154	-0.650292	0.181991	-3.5732	0.000352639	0.00393017
COQ10A	151.965	-0.648327	0.153905	-4.21251	2.53e-05	0.000603429
MRPL53	613.311	-0.640432	0.144594	-4.42917	9.46e-06	0.000315926
FAH	375.596	-0.637073	0.169673	-3.75471	0.000173541	0.0023657
IFI27L2	698.964	-0.635239	0.23452	-2.70868	0.00675524	0.0305156
RPS8	16566.1	-0.632723	0.165471	-3.82376	0.00013143	0.0019465
PPAPDC1B	522.614	-0.632409	0.171887	-3.67921	0.000233955	0.00291807
NDUFA4	2196.23	-0.627915	0.136174	-4.61113	4e-06	0.000173155
C9orf123	730.914	-0.62295	0.163287	-3.81507	0.000136145	0.00198901
RPL38	5416.39	-0.620563	0.18994	-3.26716	0.00108633	0.00853016
BLVRA	1050.37	-0.618788	0.151086	-4.0956	4.21e-05	0.000863999
CCS	547.576	-0.616265	0.158084	-3.89833	9.69e-05	0.00155511
CTSF	851.082	-0.612005	0.223659	-2.73633	0.00621293	0.028797
C1orf63	612.853	-0.609402	0.214041	-2.84714	0.00441146	0.0226376
STAT5A	1240.51	-0.608226	0.156558	-3.88498	0.00010234	0.00161203
RPS13	5729.65	-0.603389	0.145072	-4.15923	3.19e-05	0.000713983
EDEM2	766.052	-0.60208	0.15836	-3.80198	0.000143544	0.00206746
IFITM2	1247.88	-0.600626	0.212765	-2.82296	0.00475826	0.0238238
RPL28	17602.5	-0.600116	0.170845	-3.51263	0.000443692	0.00456259
CDK18	878.396	-0.595448	0.21882	-2.72117	0.00650509	0.0297434
MRPS26	1011.16	-0.593481	0.180483	-3.28829	0.00100798	0.00809876
POLR2L	1623.29	-0.589659	0.159229	-3.70321	0.000212888	0.00270686
USMG5	800.964	-0.589585	0.178014	-3.31201	0.000926275	0.00766393
MFSD3	247.164	-0.588412	0.206313	-2.85204	0.00434402	0.022417
KRTCAP3	482.322	-0.584821	0.206801	-2.82794	0.00468486	0.0236045
LOC550643	321.887	-0.584011	0.172432	-3.38691	0.000706847	0.00635575
HIGD2A	1297.78	-0.582713	0.160867	-3.62233	0.000291966	0.00344256
ZNF581	423.83	-0.580813	0.149761	-3.87826	0.000105204	0.00164583
BTN3A1	767.509	-0.579969	0.218155	-2.65852	0.00784841	0.0339709
SCARNA12	5.00966	-0.575926	0.267609	-2.15211	0.0313883	0.0920513
TIMM17B	1041.99	-0.575496	0.159506	-3.60798	0.000308592	0.00358973
RPS7	3226.62	-0.573268	0.153496	-3.73474	0.000187909	0.00248612
AHSA2	261.693	-0.572487	0.21426	-2.67192	0.00754179	0.03301
RPS2	8061.89	-0.571765	0.167614	-3.4112	0.000646787	0.00595323
ZFYVE28	103.16	-0.570646	0.20517	-2.78134	0.00541358	0.0261825
RPL23	10070.9	-0.570005	0.155957	-3.65488	0.000257302	0.00314718
UBE2S	872.884	-0.566943	0.184117	-3.07926	0.00207514	0.0133595
LOC388796	516.857	-0.559582	0.208588	-2.68271	0.00730273	0.0322098
SCRN2	555.556	-0.555714	0.161875	-3.43297	0.000597002	0.00562778
RPL18	16686.8	-0.554627	0.165446	-3.35232	0.00080137	0.00694831
SLC5A6	863.159	-0.549327	0.164305	-3.34333	0.000827793	0.00709896
RPS18	14858.8	-0.546652	0.179178	-3.05089	0.00228168	0.0143024
RPL14	5517.42	-0.543589	0.180706	-3.00814	0.00262848	0.0158166
RPS3	20225.5	-0.542055	0.1796	-3.01812	0.00254347	0.015447
TMEM219	1418.08	-0.539155	0.123749	-4.35683	1.32e-05	0.000390865
WDR54	310.403	-0.536341	0.217761	-2.46298	0.0137787	0.0507802
ABCA2	1245.21	-0.536072	0.222495	-2.40936	0.0159805	0.0564553
PSMG3	985.645	-0.535484	0.17296	-3.096	0.0019615	0.0128216
PPIH	636.162	-0.535469	0.137888	-3.88336	0.000103021	0.00161998
C19orf48	2252.35	-0.534566	0.170095	-3.14274	0.00167373	0.0114892
H2AFX	1781.6	-0.532885	0.175907	-3.02936	0.00245073	0.0150202
RPL36AL	2972.69	-0.531512	0.139374	-3.81357	0.000136974	0.0019934
TUSC1	552.624	-0.530857	0.178085	-2.98091	0.00287389	0.0168133
C7orf26	549.995	-0.529121	0.0996723	-5.30861	1.1e-07	1.43e-05
RBM6	1014.04	-0.528345	0.130374	-4.05254	5.07e-05	0.00097169
SNHG1	1089.37	-0.526676	0.196341	-2.68246	0.00730822	0.0322184
MAN2C1	747.382	-0.524574	0.11715	-4.47781	7.54e-06	0.000267814
RPL12	5867.92	-0.522805	0.151181	-3.45813	0.000543935	0.00528513
CRYZ	558.933	-0.522568	0.192625	-2.71287	0.00667023	0.0302956
ATG16L2	297.098	-0.518177	0.202211	-2.56256	0.0103905	0.0413915
LSM7	881.288	-0.517905	0.188567	-2.74653	0.00602289	0.0282034
RPL37	12549.8	-0.513	0.191516	-2.67863	0.00739243	0.0324803
SULT1A1	160.704	-0.512102	0.237298	-2.15805	0.0309237	0.0911114
RPL15	13122.8	-0.510999	0.1549	-3.2989	0.000970654	0.00792678
RPS15	5292.23	-0.510546	0.185481	-2.75256	0.00591319	0.0279069
N6AMT2	91.0674	-0.510452	0.135819	-3.75834	0.000171048	0.00234567
CRIP2	1887.37	-0.505224	0.213441	-2.36705	0.0179307	0.0613587
RPL4	19519.9	-0.504519	0.150822	-3.34512	0.000822474	0.00707484
NDUFS5	2570.66	-0.503922	0.154477	-3.26212	0.00110582	0.00863364
ATP5G1	1347.2	-0.499683	0.175463	-2.8478	0.00440227	0.0225968
RPL19	15895.4	-0.496998	0.133774	-3.71522	0.000203029	0.0026215
NLRP3	61.6042	-0.496652	0.232458	-2.13653	0.0326365	0.0946071
ZNRD1	449.572	-0.493903	0.12651	-3.90407	9.46e-05	0.00152528
ZNF593	480.287	-0.49276	0.172751	-2.85243	0.00433869	0.0224084
COX6B1	3675.39	-0.492006	0.153453	-3.20624	0.00134482	0.00985201
RPL27	10870.8	-0.491619	0.147095	-3.34218	0.000831246	0.00711206
COX7C	3099.84	-0.491303	0.149876	-3.27806	0.00104522	0.00830531
MRPS21	1078.27	-0.489921	0.161228	-3.03868	0.00237616	0.0147185
PPM1J	111.83	-0.487755	0.181289	-2.69049	0.00713476	0.0317052
WDR13	1461.09	-0.484086	0.140059	-3.45631	0.000547629	0.00531488
C9orf72	337.56	-0.481852	0.16037	-3.00463	0.00265903	0.0159325
NPM3	549.253	-0.481551	0.210754	-2.2849	0.0223185	0.0718922
RRAS	876.892	-0.479871	0.188761	-2.54222	0.0110151	0.0432147
RPS15A	9740.39	-0.477391	0.159927	-2.98506	0.00283523	0.016663
HKR1	396.922	-0.472432	0.159222	-2.96713	0.00300592	0.0173586
MANF	1213.63	-0.469933	0.143274	-3.27995	0.00103826	0.00827426
RPL22	5870.22	-0.463946	0.137588	-3.372	0.000746252	0.00661311
ATAD3B	503.212	-0.46365	0.174209	-2.66145	0.00778048	0.0337571
QPCTL	252.788	-0.459595	0.154999	-2.96516	0.00302528	0.0174416
SLC29A2	297.345	-0.459424	0.199369	-2.3044	0.0212005	0.0693507
TMEM18	540.3	-0.45921	0.117202	-3.91809	8.93e-05	0.0014555
CRELD1	361.273	-0.453853	0.148685	-3.05245	0.00226982	0.0142525
SNRNP70	3740.45	-0.453716	0.124475	-3.64502	0.00026737	0.0032294
POLR3GL	377.952	-0.453444	0.117658	-3.85391	0.000116246	0.00178078
RPS5	12453.9	-0.452008	0.170562	-2.65011	0.00804651	0.03465
DGAT1	792.403	-0.448133	0.122907	-3.64612	0.000266227	0.00322278
RASA4	194.504	-0.446712	0.192807	-2.31688	0.02051	0.0675865
NDUFC1	740.882	-0.445661	0.136917	-3.25496	0.00113408	0.00875877
RPL6	6118.34	-0.444747	0.133329	-3.33571	0.000850819	0.0072456
ANAPC11	1611.91	-0.444588	0.179028	-2.48335	0.0130155	0.0486324
ISCU	1410.37	-0.441558	0.119165	-3.70542	0.000211038	0.00268719
SERF2	7234.04	-0.440849	0.156436	-2.81808	0.00483118	0.0240706
EIF2S2	2394.93	-0.437109	0.153659	-2.84467	0.0044457	0.0227749
DDX26B	242.427	-0.435445	0.193831	-2.24652	0.0246706	0.0773673
ALKBH2	424.387	-0.433634	0.14575	-2.9752	0.00292801	0.0170105
SLC25A26	346.107	-0.433224	0.128711	-3.36587	0.000763035	0.00671639
C11orf31	1111.78	-0.43251	0.147046	-2.94131	0.00326822	0.0183756
NEDD8	2095.45	-0.431951	0.13458	-3.20963	0.00132908	0.00979841
EIF3F	2135.33	-0.431168	0.114474	-3.76652	0.000165539	0.00228723
WDR83	220.031	-0.431137	0.1299	-3.319	0.000903411	0.00752776
IAH1	477.753	-0.429988	0.125064	-3.43813	0.000585746	0.00556171
EEF1B2	2810.92	-0.429132	0.139247	-3.08182	0.00205742	0.0132827
TMEM70	567.329	-0.427191	0.137944	-3.09685	0.00195591	0.0128005
VPS28	1925.26	-0.426084	0.136904	-3.11228	0.00185651	0.0123689
DDX51	520.398	-0.42595	0.120114	-3.54621	0.000390822	0.00420523
GATS	192.624	-0.425362	0.195426	-2.17659	0.0295111	0.0881866
JAGN1	761.097	-0.422733	0.124429	-3.39737	0.000680362	0.00617241
ATF4	6554.59	-0.420755	0.113462	-3.70834	0.00020862	0.00267023
PRSS16	281.367	-0.420701	0.165265	-2.54562	0.0109085	0.0429229
SF3B5	1753.51	-0.420446	0.143684	-2.92619	0.00343145	0.0189448
FBL	4782.21	-0.419534	0.173699	-2.41529	0.0157226	0.0557804
ILK	1772.83	-0.419451	0.118882	-3.52831	0.000418228	0.00439691
MAGOH	787.8	-0.417133	0.124694	-3.34526	0.000822048	0.00707484
DTD1	812.763	-0.416638	0.191021	-2.18111	0.0291751	0.0874584
RPL18A	1003.65	-0.415927	0.189502	-2.19484	0.0281753	0.0854579
SERTAD1	738.763	-0.41451	0.157158	-2.63754	0.00835086	0.0355333
ZFYVE27	550.074	-0.414334	0.116525	-3.55576	0.000376887	0.00411813
SHFM1	2372.69	-0.41382	0.177905	-2.32607	0.0200148	0.0664441
GAR1	462.285	-0.409343	0.129539	-3.16	0.00157769	0.011024
KCTD6	137.119	-0.407987	0.17709	-2.30385	0.0212313	0.0693911
COMMD5	619.859	-0.402534	0.10735	-3.74972	0.00017703	0.00238665
EIF3K	4333.18	-0.402301	0.147467	-2.72807	0.00637065	0.0293187
NR2C2AP	792.871	-0.402047	0.152722	-2.63254	0.00847495	0.0359279
IDI2	56.1084	-0.401892	0.158442	-2.53652	0.0111961	0.0436675
TARSL2	240.322	-0.398314	0.14526	-2.74207	0.00610528	0.0284908
DNASE2	1721.06	-0.396519	0.125587	-3.15733	0.00159221	0.0110752
GNB2L1	24700.9	-0.396347	0.143324	-2.7654	0.00568538	0.0271109
CDC37L1	376.858	-0.396082	0.16255	-2.43667	0.0148231	0.0534479
RPL7A	10332.5	-0.395734	0.159695	-2.47806	0.0132099	0.0491684
B3GALT6	752.56	-0.394674	0.131946	-2.99118	0.00277904	0.0164579
JMJD4	551.244	-0.393331	0.118247	-3.32634	0.000879954	0.00739073
HMGN4	1443.58	-0.391251	0.0941065	-4.15753	3.22e-05	0.000717417
B3GNT1	321.867	-0.383533	0.147766	-2.59554	0.00944414	0.0386795
LOC285074	226.819	-0.382301	0.127107	-3.00771	0.00263221	0.0158266
APBB3	210.71	-0.378575	0.172809	-2.19072	0.0284724	0.0861028
MGC16275	32.2166	-0.374199	0.147647	-2.53442	0.0112634	0.0438741
MRPL20	1276.05	-0.37357	0.137302	-2.72079	0.00651257	0.0297584
ACAD8	325.377	-0.372838	0.120467	-3.09493	0.00196862	0.0128359
NGDN	617.041	-0.370965	0.111485	-3.32747	0.00087638	0.00737422
BRF2	392.689	-0.370794	0.114201	-3.24685	0.00116692	0.00892965
DDRGK1	953.619	-0.370061	0.153626	-2.40885	0.0160028	0.0565114
TP53TG1	317.118	-0.369767	0.170971	-2.16275	0.0305607	0.0904051
FDXACB1	61.2662	-0.369224	0.127973	-2.88516	0.00391213	0.020785
ULK3	913.005	-0.368658	0.134483	-2.74129	0.00611981	0.028525
ATP6V0B	2617.83	-0.366826	0.124049	-2.9571	0.00310545	0.0177268
CENPH	641.205	-0.365419	0.161827	-2.25809	0.0239404	0.0757298
SH2B1	988.067	-0.363238	0.122608	-2.96259	0.00305062	0.0175449
CDK10	705.443	-0.363192	0.168597	-2.1542	0.0312242	0.0917167
BCAT2	1135.07	-0.362048	0.148165	-2.44355	0.0145435	0.0527847
RBMX2	473.654	-0.361685	0.125985	-2.87087	0.00409344	0.0214867
COX6A1	2364.86	-0.360928	0.162429	-2.22206	0.0262793	0.0812669
RHOT2	1727.45	-0.355246	0.117936	-3.01219	0.00259369	0.0156432
RPL24	6808.16	-0.354802	0.160759	-2.20704	0.0273113	0.0834728
RSL24D1	1574.05	-0.35457	0.119365	-2.97046	0.00297353	0.0172149
RABGGTB	753.224	-0.35453	0.126802	-2.79594	0.0051749	0.0253289
AKAP8L	948.327	-0.353374	0.108288	-3.26329	0.00110126	0.00860683
ATXN7L2	138.76	-0.353068	0.125448	-2.81446	0.00488593	0.0242642
NDUFV1	3193.67	-0.352917	0.165435	-2.13327	0.0329024	0.0951522
COX7A2	1951.39	-0.35255	0.144503	-2.43974	0.014698	0.0531745
ZNHIT1	1138.98	-0.351051	0.156642	-2.24111	0.0250192	0.0781478
METTL5	519.47	-0.343492	0.119397	-2.8769	0.00401604	0.0211957
GRHPR	1578.19	-0.340672	0.102306	-3.32995	0.000868621	0.00734941
C1orf123	433.715	-0.339374	0.0972517	-3.48965	0.000483662	0.00485915
BCS1L	395.239	-0.33933	0.125254	-2.70913	0.00674608	0.0305029
TIMM8A	193.957	-0.338242	0.155725	-2.17205	0.0298517	0.0889103
CCDC101	403.539	-0.337562	0.147725	-2.28507	0.0223087	0.071873
DHPS	1011.14	-0.337141	0.109424	-3.08104	0.00206277	0.0133078
ISOC1	618.668	-0.336678	0.136124	-2.47332	0.0133866	0.0496949
ARHGEF1	2277.04	-0.336082	0.127206	-2.64202	0.00824137	0.0352631
TOE1	325.669	-0.33555	0.0840732	-3.99117	6.57e-05	0.00118769
MRPS17	308.198	-0.33405	0.15266	-2.1882	0.0286553	0.0864279
ZNF605	331.402	-0.333487	0.130291	-2.55955	0.0104807	0.0416209
RBM5	1402.6	-0.330712	0.128876	-2.56612	0.0102843	0.041099
CDADC1	122.965	-0.329819	0.121771	-2.70851	0.00675856	0.0305156
RRP1	1321.09	-0.324605	0.141303	-2.29722	0.0216063	0.0702395
MUS81	629.791	-0.323266	0.0941891	-3.43209	0.000598938	0.00563733
PSMB4	5371.48	-0.322357	0.0967579	-3.33158	0.000863542	0.00732203
C19orf12	399.995	-0.319676	0.101849	-3.13873	0.0016968	0.0116096
ZCCHC3	597.17	-0.316831	0.106513	-2.97457	0.00293396	0.0170181
EEF1A1	56219.4	-0.313294	0.140058	-2.23689	0.0252935	0.0788245
NACA	12944	-0.312259	0.10331	-3.02254	0.00250661	0.0152881
AGPAT6	1453.25	-0.306869	0.0971352	-3.15919	0.00158207	0.011042
SNRPB2	907.59	-0.305906	0.13289	-2.30195	0.0213378	0.0696821
TRAPPC2	249.737	-0.304894	0.124417	-2.45058	0.0142626	0.0521653
PRMT1	3574.84	-0.30448	0.129144	-2.35768	0.0183894	0.0623981
ARFGAP1	1505.24	-0.301485	0.119212	-2.52898	0.0114394	0.0443989
POLR2F	792.989	-0.300997	0.140891	-2.13638	0.0326488	0.0946277
MAGED2	2368.56	-0.298724	0.13958	-2.14017	0.0323412	0.094023
C1orf122	648.968	-0.297422	0.138632	-2.14541	0.0319202	0.0931938
SF3B14	1455.25	-0.297236	0.121528	-2.44583	0.0144519	0.0525535
C17orf75	289.112	-0.294719	0.128285	-2.29738	0.0215971	0.0702222
DYNC2LI1	199.291	-0.293749	0.126101	-2.32946	0.0198345	0.0660075
CCDC90A	405.639	-0.288205	0.109698	-2.62726	0.00860746	0.0362953
PBXIP1	2284.23	-0.284241	0.132531	-2.14472	0.0319754	0.0932956
C11orf54	247.242	-0.284167	0.126168	-2.25229	0.0243038	0.0765784
TM2D3	576.184	-0.283029	0.0962357	-2.941	0.00327154	0.018383
RPUSD4	397.259	-0.278236	0.128533	-2.16472	0.0304094	0.0901157
SUMF2	2277.06	-0.278236	0.105487	-2.63762	0.00834894	0.0355333
THOC1	505.875	-0.27783	0.131301	-2.11597	0.0343472	0.0981825
MLLT6	3633.34	-0.277809	0.106864	-2.59964	0.00933212	0.0383868
LARP1B	351.277	-0.274487	0.127037	-2.16069	0.0307196	0.0907289
ZNF26	199.32	-0.270531	0.114215	-2.36861	0.0178552	0.0612259
MRPS5	1071.53	-0.269582	0.117081	-2.30253	0.0213052	0.0696062
CXXC1	1331.88	-0.262817	0.112144	-2.34357	0.0191004	0.0642698
RPA2	2132.69	-0.258803	0.110753	-2.33676	0.0194514	0.0650807
TBCC	572.433	-0.250446	0.10784	-2.32239	0.0202122	0.0668695
HAX1	1594.27	-0.24832	0.092368	-2.68838	0.00717993	0.0318211
OSTC	1386.7	-0.246938	0.105262	-2.34593	0.0189798	0.0639696
MCRS1	1251.21	-0.240545	0.0818102	-2.94028	0.00327913	0.01842
AAAS	833.806	-0.236316	0.101952	-2.31791	0.0204541	0.067463
MRPL32	743.131	-0.236288	0.109702	-2.15391	0.0312469	0.0917687
CD2BP2	1679.2	-0.235779	0.106659	-2.2106	0.0270638	0.0828742
HDHD2	482.994	-0.230744	0.101826	-2.26606	0.0234477	0.0746367
PREB	1290.56	-0.227833	0.0867603	-2.626	0.0086395	0.0363974
NHP2L1	2695.96	-0.225808	0.100714	-2.24206	0.0249576	0.0780351
CPSF3L	1913.33	-0.224236	0.10603	-2.11483	0.0344442	0.0983086
HSP90B1	16390.9	-0.21622	0.0922908	-2.34281	0.019139	0.0643437
CCDC59	520.933	-0.211702	0.100478	-2.10695	0.0351216	0.0998455
ZNF263	636.407	-0.211067	0.0822486	-2.56621	0.0102817	0.0410978
WDR73	295.502	-0.208787	0.0886587	-2.35495	0.0185254	0.0627508
UNC50	472.799	-0.200235	0.0794566	-2.52005	0.0117337	0.0452158
PRKAG1	1097.48	-0.165577	0.0676692	-2.44686	0.0144106	0.0524502
HNRNPK	11850.2	0.129982	0.056677	2.29338	0.021826	0.0707729
CASC3	1953.97	0.137967	0.0578682	2.38415	0.0171185	0.0594559
HNRNPU	10780.3	0.14278	0.0570994	2.50056	0.0123997	0.0470506
TBC1D9B	3046.04	0.181242	0.0857894	2.11263	0.0346321	0.0987158
SF3A1	3330.7	0.188565	0.0881994	2.13794	0.032522	0.0944245
DDX46	1747.17	0.19235	0.0886391	2.17003	0.0300045	0.0892348
HECTD3	1131.11	0.198033	0.0864887	2.2897	0.0220389	0.0712477
HS2ST1	854.943	0.199984	0.0880314	2.27173	0.0231026	0.0737699
XPO1	4584.52	0.209461	0.0769166	2.72322	0.00646492	0.0296336
KIAA0100	4071.53	0.218227	0.0986631	2.21184	0.0269777	0.0826474
M6PR	3259.47	0.219928	0.0839349	2.62022	0.0087872	0.0367923
ZNF213	493.32	0.222462	0.0998602	2.22774	0.025898	0.0802365
JOSD1	2144.71	0.225153	0.0830985	2.70947	0.00673906	0.0304906
MAML1	1468.65	0.228606	0.0990294	2.30847	0.020973	0.0688102
RNF40	2470.23	0.23188	0.0922412	2.51384	0.0119423	0.0458369
FBXO11	1176.23	0.236265	0.0821321	2.87665	0.00401925	0.0212066
SNRNP200	6244.42	0.237855	0.0970712	2.45031	0.0142733	0.0521939
PPP2R5C	1781.35	0.239915	0.0993876	2.41393	0.0157813	0.0559348
DGCR2	3501.98	0.240991	0.109457	2.2017	0.0276863	0.0843235
HCFC1	3005.02	0.247475	0.0973987	2.54084	0.0110586	0.0432691
LSM14B	1150.77	0.249005	0.0959365	2.59552	0.00944467	0.0386795
PI4K2B	959.674	0.252947	0.111859	2.26131	0.0237403	0.0752555
CRAMP1L	769.081	0.254956	0.116246	2.19324	0.02829	0.0856565
PCNXL3	2029.91	0.25738	0.0938997	2.74101	0.00612509	0.0285376
AKT1	3315.69	0.257905	0.102739	2.5103	0.0120629	0.0461835
KPNB1	5606.62	0.258116	0.0886447	2.9118	0.00359353	0.0194818
FNIP1	516.393	0.260384	0.110656	2.35311	0.0186173	0.062956
CBX1	1900.38	0.260432	0.0968025	2.69035	0.00713775	0.0317108
ZFYVE16	776.205	0.263773	0.114965	2.29438	0.0217689	0.0706814
YWHAB	7385.69	0.265723	0.0815078	3.2601	0.00111374	0.0086698
STAU1	2842.13	0.266416	0.0854031	3.11951	0.00181151	0.0121574
GBF1	2243.86	0.267043	0.114483	2.3326	0.0196691	0.0656294
SMC3	1902.6	0.268132	0.126062	2.12698	0.0334218	0.0963287
SF3B1	5624.87	0.268733	0.0911131	2.94944	0.00318346	0.0180596
LLGL1	1461.73	0.271804	0.122402	2.22059	0.0263784	0.0815183
MCFD2	1738.79	0.272753	0.117621	2.31892	0.0203996	0.0673557
ERLIN2	1211.05	0.272777	0.123535	2.2081	0.027237	0.0832734
HBP1	1736.44	0.273197	0.113198	2.41344	0.0158026	0.0559779
MTOR	1877.33	0.274172	0.126675	2.16438	0.0304355	0.0901366
MSH3	484.979	0.276532	0.10909	2.5349	0.0112479	0.0438487
ATMIN	1291.95	0.277288	0.104966	2.64169	0.00824926	0.0352729
KDM3A	1781.77	0.28106	0.122134	2.30125	0.0213776	0.0697434
UBN1	1881.82	0.281219	0.0919673	3.05782	0.00222954	0.0140815
NCAPD2	4247.32	0.28257	0.131438	2.14983	0.0315685	0.0924468
CDC27	1242.61	0.285172	0.095269	2.99333	0.00275951	0.0163687
CEP350	1406.32	0.28666	0.122203	2.34576	0.0189884	0.0639833
DNMT1	3967.67	0.286748	0.110168	2.60284	0.00924554	0.038151
UBR7	1308.44	0.292536	0.106372	2.75011	0.00595749	0.0280438
UBTD2	697.286	0.293884	0.109774	2.67717	0.00742464	0.0325906
AARS	3265.65	0.298354	0.1068	2.79358	0.00521288	0.0254603
MBTPS2	397.177	0.298878	0.138509	2.15782	0.0309419	0.0911356
ZFR	1878.01	0.301855	0.111565	2.70564	0.00681731	0.0306963
AKAP10	387.067	0.30284	0.143736	2.10692	0.0351243	0.0998455
KPNA2	4515.64	0.30499	0.120017	2.54123	0.0110463	0.0432489
SOS2	820.922	0.30636	0.145421	2.10672	0.0351421	0.0998774
SEL1L	1930.36	0.307459	0.144928	2.12146	0.0338831	0.0971455
C15orf41	287.104	0.308692	0.127926	2.41305	0.0158197	0.0560099
CHORDC1	410.193	0.311522	0.142833	2.18102	0.0291816	0.0874584
TMEM192	302.732	0.315439	0.121222	2.60216	0.00926389	0.0381869
KDM5A	1752.99	0.316888	0.148193	2.13834	0.0324889	0.0943583
MPP5	750.591	0.31755	0.134749	2.3566	0.018443	0.0625283
RABGAP1	1772.07	0.318179	0.13072	2.43404	0.0149311	0.0537738
KHSRP	3577.75	0.320075	0.096997	3.29985	0.000967373	0.00790409
TTF2	763.544	0.322441	0.146314	2.20377	0.0275409	0.083995
RAD50	1092.29	0.325095	0.130794	2.48555	0.012935	0.04848
CYTH3	500.578	0.328913	0.15119	2.17549	0.0295935	0.0883686
ARHGEF11	1105.89	0.331235	0.123957	2.67218	0.00753594	0.0329922
NCBP1	1230.12	0.331498	0.0964487	3.43704	0.0005881	0.00557252
TRIM25	1767.53	0.331555	0.117716	2.81656	0.0048541	0.0241388
GSTCD	330.672	0.33208	0.1433	2.31738	0.020483	0.0675458
SPTAN1	6264.33	0.332189	0.110909	2.99516	0.00274304	0.0163185
GATAD2A	2069.45	0.333783	0.0993842	3.35852	0.000783618	0.00685806
TUG1	3416.05	0.335145	0.107341	3.12225	0.00179473	0.0120922
ATP6V0D1	2204.5	0.335477	0.135568	2.47461	0.0133382	0.0495754
YY1	1384.97	0.336558	0.110603	3.04293	0.00234285	0.0145812
PTPDC1	205.271	0.337496	0.128377	2.62894	0.00856506	0.0361511
PHF2	1304.38	0.339592	0.123395	2.75207	0.00592199	0.0279265
CD164	4712.16	0.340893	0.114102	2.9876	0.00281173	0.0165801
YME1L1	3103.02	0.349784	0.0932575	3.75073	0.000176319	0.00238351
TOPBP1	2361.93	0.349896	0.159437	2.19457	0.0281945	0.0854881
EIF4G3	1463.12	0.351688	0.138063	2.5473	0.0108561	0.0427689
SUCLA2	671.405	0.354016	0.14881	2.37898	0.0173605	0.0600236
STX17	837.856	0.354312	0.112813	3.14071	0.00168539	0.0115477
ATP13A2	1390.43	0.35477	0.138563	2.56034	0.0104568	0.0415441
CREBBP	2616.54	0.357758	0.132801	2.69394	0.00706132	0.031417
ZFYVE1	589.36	0.360522	0.112492	3.20487	0.00135124	0.00987836
GLG1	4146.87	0.36495	0.112498	3.24406	0.00117838	0.00899858
DAG1	3552.94	0.36632	0.130425	2.80866	0.00497481	0.0245791
INVS	221.197	0.366889	0.129325	2.83696	0.00455459	0.0231315
CASKIN2	691.822	0.367801	0.114751	3.20519	0.00134971	0.0098751
RPRD2	1585.32	0.368719	0.122342	3.01383	0.0025797	0.0155793
BACE1	613.584	0.369277	0.138408	2.66802	0.00762991	0.0332607
ARFGEF2	1580.5	0.369989	0.160481	2.3055	0.0211389	0.0692233
ERCC6	300.09	0.374657	0.14535	2.57761	0.0099486	0.0402118
PI4KA	1783.43	0.375292	0.102699	3.65428	0.000257907	0.00315038
C16orf87	105.215	0.377479	0.149326	2.52789	0.0114751	0.044488
GNA11	565.314	0.379466	0.165443	2.29363	0.0218116	0.0707565
EIF2AK3	754.024	0.381203	0.14001	2.72268	0.00647541	0.029652
ZFYVE26	892.754	0.381304	0.130077	2.93137	0.00337472	0.0187169
UHRF1	1171.24	0.381359	0.142317	2.67965	0.00736993	0.0324281
GIGYF2	1418.16	0.383102	0.117667	3.25581	0.0011307	0.00874742
GSPT1	3270.88	0.383309	0.0970156	3.95101	7.78e-05	0.00133981
ATP7A	376.166	0.383805	0.175543	2.18638	0.0287878	0.0867135
EIF4G2	21383.5	0.38698	0.117019	3.30698	0.000943066	0.00777129
NACC1	2089.29	0.388836	0.110334	3.52416	0.000424833	0.00444563
SCRN1	1740.97	0.39183	0.156244	2.50781	0.012148	0.0464416
CDC14B	404.143	0.394065	0.170985	2.30468	0.0211847	0.0693362
TRIM59	574.832	0.394663	0.18524	2.13055	0.0331258	0.0956777
HERC2	2186.58	0.394684	0.142044	2.77861	0.00545926	0.0263271
FOXJ2	979.123	0.395587	0.132345	2.98907	0.00279826	0.016529
PSKH1	815.367	0.395863	0.118958	3.32774	0.000875523	0.00737152
NAMPT	2402.23	0.396374	0.179673	2.20608	0.0273782	0.0836215
BRAF	152.133	0.397401	0.132525	2.99868	0.00271148	0.0161821
ZBTB26	68.1922	0.397916	0.177903	2.2367	0.0253061	0.078829
ABL2	755.915	0.405635	0.144582	2.80557	0.00502281	0.0247651
RASA1	775.607	0.406078	0.128292	3.16526	0.00154946	0.0108718
KIAA1715	656.047	0.407265	0.132914	3.06413	0.00218301	0.0138784
CLIC4	3644.67	0.40967	0.149202	2.74574	0.00603755	0.0282394
RSBN1L	432.628	0.410828	0.106619	3.85322	0.000116573	0.00178411
DYNC1H1	8704.42	0.412195	0.134673	3.06072	0.00220806	0.0139944
GRB7	1276.49	0.413795	0.185185	2.23449	0.0254506	0.0792118
VCPIP1	708.301	0.414881	0.130301	3.18401	0.00145251	0.0103828
CBL	763.724	0.415702	0.144074	2.88533	0.00391002	0.0207798
GPATCH8	1370.67	0.420879	0.11153	3.77368	0.000160859	0.00224455
ZBTB4	1934	0.422919	0.113336	3.73154	0.000190316	0.00250498
ACTL6A	2441.94	0.423067	0.125744	3.36451	0.000766805	0.00673664
AMACR	264.39	0.425889	0.16175	2.63301	0.00846312	0.035886
KIAA1524	619.988	0.435779	0.172959	2.51955	0.0117504	0.0452518
PRKAA1	1202.04	0.43585	0.109501	3.98032	6.88e-05	0.00122703
PAPOLA	3694.41	0.436338	0.106358	4.10252	4.09e-05	0.000846664
C11orf30	485.539	0.439507	0.195981	2.2426	0.0249223	0.0779647
DTX3L	3884.39	0.44047	0.181445	2.42757	0.0152004	0.05454
JMY	794.97	0.443429	0.12593	3.52124	0.000429535	0.00446579
ARID3A	120.595	0.445518	0.18367	2.42564	0.0152813	0.0547875
PLEKHM1	1045.22	0.453301	0.128643	3.52372	0.000425529	0.00444563
PNPLA8	786.571	0.453406	0.117092	3.87222	0.000107849	0.00168005
FAM83D	1373.97	0.453985	0.170377	2.66459	0.00770811	0.0335378
SHCBP1	436.551	0.456692	0.154637	2.95332	0.00314375	0.0178897
LNX2	646.792	0.457054	0.143828	3.17779	0.00148404	0.0105587
ECT2	2553.52	0.459668	0.182689	2.51612	0.0118655	0.0455991
TSTD2	466.062	0.459673	0.161407	2.84792	0.00440062	0.0225968
ZNF292	847.213	0.460174	0.171758	2.6792	0.00737989	0.0324563
BAZ2A	2675.24	0.461328	0.119886	3.84804	0.000119067	0.00180606
C10orf118	482.56	0.462957	0.211008	2.19403	0.0282334	0.0855634
PRKCI	1852.96	0.464981	0.159084	2.92287	0.00346819	0.0190672
TYRO3	475.867	0.465835	0.170179	2.73732	0.00619416	0.02873
CCDC120	641.376	0.466915	0.163018	2.86419	0.00418072	0.0218585
UBR2	799.917	0.470308	0.150632	3.12224	0.0017948	0.0120922
RFWD3	1531.85	0.474482	0.127936	3.70875	0.000208289	0.00266874
CPSF2	1481.58	0.477021	0.110697	4.30925	1.64e-05	0.000454668
NPAT	468.183	0.481141	0.143364	3.35609	0.000790522	0.00688957
QSER1	1665.2	0.48632	0.139945	3.47507	0.000510716	0.00506434
NPEPPS	2312.25	0.488505	0.119008	4.10482	4.05e-05	0.000842103
EVI5L	513.755	0.488592	0.113955	4.28757	1.81e-05	0.000485626
ATG2B	660.706	0.488702	0.157282	3.10717	0.0018889	0.0124861
FAM120A	4840.91	0.494241	0.113642	4.34911	1.37e-05	0.000401004
FURIN	2952.62	0.499323	0.15957	3.12918	0.00175296	0.011888
CLSPN	419.168	0.506266	0.19314	2.62124	0.00876098	0.0367496
MLL3	1517.28	0.514488	0.160914	3.19729	0.00138725	0.0100241
ZBTB7B	2199.85	0.515927	0.149074	3.46088	0.000538421	0.00525444
ZDHHC3	1915.82	0.517034	0.118094	4.37816	1.2e-05	0.000372569
ZNF148	1346.53	0.517395	0.139632	3.70541	0.000211048	0.00268719
SMC2	1957.9	0.52549	0.150549	3.4905	0.000482126	0.00484903
KPNA4	2719	0.52616	0.114711	4.58682	4.5e-06	0.000186266
ADAM9	2666.57	0.531022	0.185305	2.86567	0.00416133	0.0217932
MED13	1859.76	0.532018	0.126648	4.20076	2.66e-05	0.00062774
SAMD4B	1889.16	0.534968	0.118409	4.51799	6.24e-06	0.000234083
DZIP1L	99.5327	0.540777	0.255318	2.11806	0.0341704	0.0978011
RBL1	415.106	0.543509	0.212063	2.56296	0.0103784	0.0413759
MCM2	6653.93	0.543799	0.147447	3.68811	0.000225928	0.00283337
EP300	2501.99	0.54425	0.167506	3.24914	0.00115756	0.00887653
GALNT10	669.754	0.548376	0.183554	2.98754	0.00281233	0.0165801
B3GNT9	493.995	0.549089	0.146601	3.74546	0.000180062	0.00240981
C6orf132	448.192	0.55574	0.234284	2.37208	0.0176884	0.0608247
PRKDC	8155.91	0.557254	0.159634	3.49082	0.000481549	0.00484588
PARP9	3186.96	0.559685	0.201307	2.78025	0.0054317	0.0262494
STRN	424.141	0.560661	0.249099	2.25075	0.0244011	0.0767808
CPOX	805.572	0.571034	0.150716	3.78882	0.000151366	0.00213831
KLHDC10	494.822	0.572886	0.178035	3.21782	0.00129169	0.00959997
HSP90AA1	21532.6	0.575099	0.144496	3.98002	6.89e-05	0.00122703
BOK	814.548	0.589089	0.23179	2.54148	0.0110384	0.0432455
NETO2	747.423	0.592355	0.174151	3.40139	0.000670441	0.00610961
CASC5	484.607	0.596171	0.236337	2.52255	0.0116508	0.0450041
BNIP3	703.543	0.598255	0.276389	2.16454	0.0304231	0.0901186
LEPROT	439.577	0.598307	0.210903	2.83688	0.00455565	0.0231315
ICK	743.597	0.598357	0.167391	3.57461	0.00035075	0.00392321
DVL3	4043.22	0.601763	0.153517	3.91984	8.86e-05	0.00145075
MCM4	4883.49	0.606585	0.15162	4.0007	6.32e-05	0.00114988
XRN1	1542.38	0.614834	0.157701	3.89874	9.67e-05	0.00155511
STAM	579.716	0.61781	0.123698	4.99451	5.9e-07	4.76e-05
ZSCAN12P1	17.0413	0.621969	0.26555	2.34219	0.0191707	0.0644
SH3D19	997.46	0.623422	0.187868	3.31841	0.000905327	0.00753138
NOTCH2	3599.06	0.627974	0.185867	3.37862	0.000728512	0.00648726
LONP2	894.593	0.664485	0.148869	4.46356	8.06e-06	0.000280978
LMLN	356.73	0.664748	0.178112	3.7322	0.000189817	0.00250411
OTUB2	122.549	0.670804	0.203616	3.29446	0.000986104	0.00801451
ARHGAP32	1239.19	0.700533	0.215201	3.25525	0.00113295	0.00875739
PIK3CA	708.617	0.708076	0.167386	4.23021	2.33e-05	0.000571533
WNK1	4516.07	0.720679	0.184526	3.90558	9.4e-05	0.00151717
LOC154761	63.8707	0.735135	0.199237	3.68975	0.000224473	0.00282092
PRR11	229.402	0.744835	0.267173	2.78783	0.00530617	0.0258081
IFIT3	1700.14	0.745667	0.345462	2.15847	0.0308916	0.0910414
C1orf226	498.145	0.748053	0.285685	2.61846	0.00883288	0.0369413
ADAM10	1581.38	0.752895	0.202155	3.72434	0.000195827	0.00255006
SLFN5	1211.09	0.757653	0.244615	3.09733	0.00195273	0.012796
SLC30A4	80.5688	0.764073	0.251754	3.035	0.00240536	0.0148329
TET1	40.6089	0.764433	0.287585	2.65811	0.00785796	0.0339961
TRIM2	1311.71	0.77178	0.265039	2.91195	0.00359176	0.0194818
DNM1	415.202	0.775941	0.30431	2.54984	0.0107773	0.0425316
CEP97	247.58	0.777269	0.206426	3.76536	0.000166308	0.00229613
DYNLT3	940.538	0.799988	0.220508	3.62793	0.000285703	0.00338833
CHSY3	65.9732	0.804413	0.286123	2.81142	0.00493234	0.024422
UHMK1	533.541	0.811587	0.313551	2.58837	0.00964306	0.0392552
RALB	1883.24	0.818794	0.197071	4.15481	3.26e-05	0.000721784
CARD6	439.746	0.835284	0.311268	2.68348	0.00728596	0.0321589
WNT5A	1004.67	0.837276	0.283239	2.95608	0.00311576	0.0177801
PRKAR2A	289.488	0.84139	0.248998	3.3791	0.00072724	0.0064839
TOR1AIP2	434.468	0.845325	0.202832	4.16761	3.08e-05	0.000693321
LIPH	325.195	0.855784	0.371463	2.30382	0.0212328	0.0693911
IL1RL1	14.2119	0.865115	0.372333	2.3235	0.0201525	0.0667696
SKIL	786.881	0.905107	0.232356	3.89535	9.81e-05	0.00156747
PLSCR4	462.147	0.993631	0.276366	3.59534	0.000323965	0.00369857
MYH10	871.228	1.00718	0.323235	3.11593	0.00183367	0.0122663
PLAG1	114.565	1.02508	0.362636	2.82674	0.00470241	0.023667
IFIT1	849.998	1.04346	0.350319	2.97861	0.00289562	0.0168881
PPFIA1	1384.79	1.05997	0.206523	5.13246	2.86e-07	2.83e-05
ADAMTS12	103.14	1.11062	0.433908	2.55957	0.0104803	0.0416209
IFIT2	579.457	1.11442	0.336952	3.30735	0.000941847	0.00776823
NOTUM	42.7789	1.2298	0.390621	3.14832	0.00164211	0.0113402
CPA4	203.013	1.26585	0.541857	2.33613	0.0194844	0.0651551
SYTL5	48.1751	1.2687	0.571685	2.21923	0.0264713	0.0816403
MGLL	1453.81	1.31368	0.288732	4.54982	5.37e-06	0.000209903
STAC	49.8863	1.31899	0.495226	2.66341	0.00773527	0.0336161
KLK10	2849.55	1.50085	0.543972	2.75906	0.00579686	0.0274923
FBN2	606.39	1.62599	0.474148	3.42929	0.000605172	0.00568725
KLK7	740.956	1.635	0.724308	2.25732	0.023988	0.075857
MED12L	25.8629	1.64084	0.327043	5.01721	5.24e-07	4.35e-05
PSG4	6.03777	1.80129	0.664982	2.70878	0.00675307	0.0305156
PKD1L2	2.66296	2.38842	0.6684	3.57334	0.000352452	0.00393017
FLG	408.689	3.60463	0.524999	6.86598	6.6e-12	1.01e-08
CDSN	700.959	4.53024	0.631931	7.16889	7.56e-13	2.18e-09

## Sheet: TCGA_152sh2
	baseMean	log2FoldChange	lfcSE	stat	pvalue	padj
DNAI2	2.69705	-3.81435	0.794114	-4.80327	1.56e-06	9.03e-05
KRT72	3.06569	-3.66515	0.813359	-4.50619	6.6e-06	0.000241664
DUSP13	15.4271	-2.4618	0.537766	-4.57782	4.7e-06	0.000191865
KRT38	3.75701	-2.30615	0.955674	-2.41312	0.0158167	0.0560099
KRT84	22.7667	-2.19617	0.6853	-3.20469	0.00135208	0.00988058
NPHS1	15.4177	-2.13886	0.68404	-3.12681	0.00176713	0.0119603
TG	188.829	-1.96471	0.517688	-3.79517	0.000147543	0.00211344
ADCY10	2.9266	-1.93343	0.63377	-3.05068	0.0022832	0.0143071
UNC45B	25.8947	-1.91969	0.744812	-2.57741	0.00995435	0.0402118
PTPRR	17.9651	-1.79539	0.473156	-3.7945	0.00014794	0.00211387
SELE	367.94	-1.73902	0.447253	-3.88823	0.000100977	0.00160157
LOC728392	184.613	-1.67708	0.264906	-6.33085	2.44e-10	1.58e-07
C1orf228	13.4899	-1.66238	0.354277	-4.69232	2.7e-06	0.000132425
MSMB	199.447	-1.66063	0.59774	-2.77819	0.00546631	0.0263541
PTPRN	5.99262	-1.53948	0.527989	-2.91575	0.0035483	0.0193338
FAM151A	27.9467	-1.48852	0.594568	-2.50353	0.0122963	0.0468131
ALDOB	4.39205	-1.45354	0.472231	-3.07803	0.00208377	0.0133962
RPS27	107.878	-1.39818	0.24455	-5.71736	1.08e-08	2.81e-06
CYP4F12	249.664	-1.32795	0.47	-2.82543	0.00472177	0.0237251
TNNI1	253.365	-1.3031	0.443797	-2.93624	0.00332218	0.0185594
ITGAM	468.786	-1.27847	0.344459	-3.71153	0.000206013	0.00264698
ATHL1	715.748	-1.23019	0.266002	-4.62473	3.75e-06	0.000166919
MYOM1	44.4532	-1.21154	0.341779	-3.5448	0.00039291	0.0042178
C17orf99	21.9332	-1.18964	0.375655	-3.16684	0.00154105	0.0108231
KLHDC7B	1226.98	-1.18723	0.465394	-2.55103	0.0107406	0.0424052
BCAS4	797.259	-1.18452	0.202961	-5.83617	5.34e-09	1.72e-06
ADCY5	100.541	-1.17604	0.497252	-2.36508	0.0180262	0.0615818
CD37	636.663	-1.1641	0.329109	-3.53713	0.000404493	0.00430684
ACAP1	389.448	-1.1345	0.281469	-4.03062	5.56e-05	0.00103971
RPL39	553.693	-1.13336	0.261022	-4.34201	1.41e-05	0.000411544
IL11RA	179.604	-1.11333	0.212724	-5.2337	1.66e-07	1.92e-05
ARNT2	937.56	-1.08734	0.427766	-2.5419	0.0110253	0.043231
LOXL4	429.884	-1.08466	0.444502	-2.44018	0.01468	0.0531531
SAA1	793.912	-1.08274	0.440673	-2.45702	0.0140096	0.0514042
CHI3L1	1589.1	-1.06806	0.413584	-2.58244	0.00981047	0.0397612
C19orf60	532.696	-1.06409	0.192207	-5.53618	3.09e-08	5.96e-06
FBXO2	448.698	-1.05963	0.357717	-2.9622	0.00305446	0.0175505
C10orf10	1281.24	-1.05782	0.268818	-3.93508	8.32e-05	0.00140634
GOLGA8B	286.595	-1.0536	0.280322	-3.75852	0.000170922	0.00234567
RTN4RL1	242.187	-1.05172	0.456258	-2.3051	0.0211607	0.0692701
NPDC1	443.955	-1.04559	0.238762	-4.37922	1.19e-05	0.000372019
DCST2	34.1499	-1.03987	0.311636	-3.3368	0.000847483	0.00722433
ENOX1	26.5912	-1.00301	0.344925	-2.90791	0.00363853	0.0196676
SERPINF1	3538.05	-0.995585	0.335979	-2.96324	0.00304423	0.0175136
LRRC16B	50.9069	-0.994778	0.316193	-3.14611	0.00165458	0.0113979
PLXNA4	37.7374	-0.989208	0.419669	-2.35711	0.0184176	0.0624652
ARL3	648.549	-0.980642	0.194424	-5.04383	4.56e-07	4e-05
FBXO44	364.451	-0.973829	0.187474	-5.19447	2.05e-07	2.23e-05
TMC8	955.196	-0.970621	0.271094	-3.58038	0.000343097	0.00386643
RDH16	157.577	-0.962275	0.411907	-2.33615	0.0194837	0.0651551
CYB5A	756.309	-0.94431	0.316687	-2.98184	0.0028652	0.0167785
PRR5L	399.965	-0.936274	0.266042	-3.51927	0.000432728	0.00448613
PLA2G4C	233.698	-0.92638	0.315204	-2.93899	0.00329288	0.018469
NRXN2	52.427	-0.910806	0.381119	-2.38982	0.0168564	0.058809
CYTH4	414.385	-0.908098	0.247002	-3.67647	0.00023648	0.00294556
CGNL1	310.976	-0.90223	0.369123	-2.44426	0.0145151	0.0526999
PRRT2	28.1769	-0.901141	0.306066	-2.94427	0.00323718	0.0182683
PHPT1	1767.01	-0.894859	0.195741	-4.57166	4.84e-06	0.000195848
SSR4	3403.09	-0.890744	0.180431	-4.93676	7.94e-07	5.67e-05
ANO9	493.195	-0.883089	0.228194	-3.86991	0.000108876	0.00169173
ISLR2	40.9752	-0.88255	0.386345	-2.28435	0.0223507	0.0719831
ATAD3C	48.738	-0.879531	0.292613	-3.00578	0.00264897	0.0158892
ALDH2	4157.64	-0.862901	0.262137	-3.2918	0.000995491	0.00804067
PYCARD	1139.28	-0.857103	0.216727	-3.95476	7.66e-05	0.0013239
CLYBL	70.3386	-0.85101	0.184116	-4.62214	3.8e-06	0.000167666
RPS19	21997.7	-0.848579	0.190111	-4.46359	8.06e-06	0.000280978
CMTM2	3.45239	-0.845869	0.3567	-2.37137	0.0177223	0.0608954
RPL34	6729.33	-0.842287	0.160808	-5.23783	1.62e-07	1.89e-05
JAZF1	292.722	-0.827427	0.221719	-3.73186	0.000190068	0.00250411
TIMP1	3188.2	-0.822073	0.243188	-3.38041	0.000723784	0.0064577
RPS24	15660.1	-0.817555	0.179584	-4.55249	5.3e-06	0.00020904
GRAMD1A	966.556	-0.813967	0.215756	-3.77263	0.000161533	0.00225053
RPS21	8139.06	-0.813111	0.211248	-3.84908	0.000118564	0.00180405
RPL31	10539.3	-0.812748	0.166206	-4.89001	1.01e-06	6.75e-05
MICALL2	902.718	-0.812504	0.188915	-4.30089	1.7e-05	0.000468314
UBXN11	577.767	-0.788139	0.179078	-4.4011	1.08e-05	0.000347662
RPL37A	13273.5	-0.787919	0.184594	-4.26839	1.97e-05	0.000509133
RPL32	11786.2	-0.786066	0.183737	-4.27822	1.88e-05	0.000496286
EPHX2	687.078	-0.782595	0.273508	-2.86133	0.0042187	0.0219744
NDUFA1	1674.25	-0.782544	0.190995	-4.0972	4.18e-05	0.000861477
RPS27A	4857.88	-0.780549	0.164186	-4.75405	1.99e-06	0.000108474
MAMDC4	176.085	-0.775764	0.33076	-2.3454	0.0190068	0.0640253
PNKD	1072.93	-0.77455	0.178864	-4.33038	1.49e-05	0.000424896
ARHGAP22	144.602	-0.773702	0.19895	-3.88893	0.000100687	0.00159835
RPL26	7272.79	-0.772392	0.167363	-4.61507	3.93e-06	0.000171655
MDGA1	281.437	-0.772172	0.31201	-2.47483	0.01333	0.0495552
PYROXD2	54.0949	-0.770137	0.303045	-2.54133	0.0110432	0.0432484
RPS9	15209	-0.769368	0.161992	-4.74941	2.04e-06	0.000110603
TCEA2	262.6	-0.767073	0.232947	-3.29291	0.000991571	0.00802269
ST8SIA1	122.769	-0.766437	0.342459	-2.23804	0.0252183	0.0786355
NINJ1	1835.92	-0.761343	0.234758	-3.24309	0.0011824	0.009018
PIM2	1145.85	-0.760776	0.257974	-2.94904	0.0031876	0.0180775
RPS10	3131.84	-0.753146	0.191297	-3.93705	8.25e-05	0.00140039
CYGB	326.407	-0.751107	0.29489	-2.54707	0.010863	0.042787
RHOH	204.381	-0.750708	0.290482	-2.58436	0.00975611	0.0396011
RPS6	27787.1	-0.747638	0.183856	-4.06643	4.77e-05	0.000939167
RPL27A	7622.84	-0.743434	0.169551	-4.38472	1.16e-05	0.000367128
ZNF488	224.784	-0.741991	0.312407	-2.37508	0.0175452	0.0604911
MAPK11	377.893	-0.739797	0.1784	-4.14684	3.37e-05	0.00074019
KCNC4	251.5	-0.737532	0.234227	-3.14879	0.00163948	0.0113305
RABAC1	1341.85	-0.727158	0.151514	-4.79929	1.59e-06	9.15e-05
RPS20	15443.4	-0.723725	0.179219	-4.03821	5.39e-05	0.00101701
RPL13A	10521.6	-0.71833	0.169453	-4.23912	2.24e-05	0.00055673
RPLP2	11205.9	-0.716662	0.175088	-4.09315	4.26e-05	0.000871806
S1PR4	129.764	-0.716504	0.29134	-2.45934	0.0139193	0.051171
CARD16	162.292	-0.716436	0.220147	-3.25435	0.0011365	0.0087701
RPS11	20311.1	-0.715732	0.164954	-4.33897	1.43e-05	0.000414645
CCDC88B	601.867	-0.712025	0.249891	-2.84934	0.004381	0.0225444
PCBD1	699.273	-0.711289	0.142512	-4.99107	6e-07	4.83e-05
GPX4	3589.5	-0.709744	0.191576	-3.70477	0.00021158	0.0026921
CBR3	711.078	-0.70729	0.242531	-2.91628	0.00354227	0.0193104
GAS6	1985.58	-0.704615	0.233514	-3.01744	0.00254919	0.0154757
AGBL2	12.7566	-0.700245	0.290296	-2.41217	0.0158577	0.0561079
ODF3B	316.645	-0.692186	0.210787	-3.28382	0.00102411	0.00819601
CAMK1G	7.99221	-0.689769	0.29913	-2.30592	0.0211153	0.0691584
ATF7IP2	142.821	-0.68971	0.262747	-2.625	0.00866487	0.0364716
ASCL2	205.789	-0.688839	0.290026	-2.3751	0.0175444	0.0604911
RPLP1	24791.8	-0.683267	0.173223	-3.94443	8e-05	0.00136431
SLA2	141.941	-0.682914	0.311812	-2.19015	0.0285134	0.0862059
APH1B	146.819	-0.680171	0.168388	-4.03931	5.36e-05	0.00101436
RPS3A	4318.67	-0.679715	0.164295	-4.13717	3.52e-05	0.000762041
CCDC146	258.822	-0.674296	0.252982	-2.66539	0.00768997	0.0334827
NPHP1	50.4926	-0.671242	0.257618	-2.60557	0.00917217	0.0379449
COX6C	2420.2	-0.668919	0.182887	-3.65756	0.000254623	0.00312066
PHLDA3	2134.2	-0.665442	0.18281	-3.64007	0.000272561	0.00327027
SMARCD3	127.457	-0.663577	0.295322	-2.24696	0.0246424	0.0773476
TCEAL1	176.697	-0.662758	0.150589	-4.40111	1.08e-05	0.000347662
RPS25	3904.29	-0.662435	0.170419	-3.8871	0.000101448	0.00160349
C19orf70	888.487	-0.655317	0.184148	-3.55863	0.000372789	0.00409434
RPS4X	22734.2	-0.653722	0.199813	-3.27167	0.00106915	0.00845314
CAPN12	154.215	-0.651645	0.211037	-3.08783	0.00201624	0.0130848
ECHDC2	593.565	-0.645011	0.183974	-3.506	0.000454899	0.00465175
TNFRSF25	316.464	-0.64249	0.21906	-2.93294	0.00335769	0.0186735
RPL30	13672.2	-0.641989	0.167481	-3.83321	0.000126483	0.0018962
EID3	34.2038	-0.636567	0.273719	-2.32562	0.020039	0.0664883
SH2D2A	206.01	-0.634237	0.18239	-3.47738	0.000506347	0.0050328
GLI4	187.38	-0.633582	0.197063	-3.21512	0.0013039	0.00966326
RAB20	249.095	-0.633214	0.189864	-3.3351	0.000852689	0.00725815
RPS8	16566.1	-0.632723	0.165471	-3.82376	0.00013143	0.0019465
COX7B	2553.58	-0.631767	0.183487	-3.44311	0.000575072	0.00549545
SPARCL1	1574.51	-0.631392	0.263687	-2.39448	0.0166439	0.0582602
SNRPD2	3570.68	-0.631136	0.151666	-4.16137	3.16e-05	0.000709944
RPL38	5416.39	-0.620563	0.18994	-3.26716	0.00108633	0.00853016
BLVRA	1050.37	-0.618788	0.151086	-4.0956	4.21e-05	0.000863999
FGL2	602.396	-0.615406	0.289862	-2.1231	0.0337451	0.0969051
UQCRB	2695.2	-0.606941	0.157567	-3.85195	0.00011718	0.0017919
FAM13A	415.024	-0.604175	0.264004	-2.28851	0.0221079	0.0713893
RPS13	5729.65	-0.603389	0.145072	-4.15923	3.19e-05	0.000713983
RPL28	17602.5	-0.600116	0.170845	-3.51263	0.000443692	0.00456259
RPL11	15813.6	-0.599133	0.154619	-3.87489	0.000106673	0.00166554
FTH1	18578.2	-0.59814	0.152821	-3.91398	9.08e-05	0.00147572
COTL1	3116.76	-0.596713	0.203475	-2.93262	0.00336115	0.0186804
SLA	521.854	-0.595968	0.258394	-2.30643	0.0210864	0.0690962
CDK18	878.396	-0.595448	0.21882	-2.72117	0.00650509	0.0297434
JOSD2	463.906	-0.591604	0.176889	-3.34449	0.000824348	0.00708599
HSF4	102.806	-0.5891	0.258538	-2.27859	0.0226917	0.072846
VAMP8	2513.78	-0.586854	0.13772	-4.26122	2.03e-05	0.000519911
IL10RA	648.617	-0.585924	0.260136	-2.25238	0.0242985	0.076575
ANKRD22	870.968	-0.585778	0.264449	-2.21509	0.0267539	0.08218
HIGD2A	1297.78	-0.582713	0.160867	-3.62233	0.000291966	0.00344256
BTN3A1	767.509	-0.579969	0.218155	-2.65852	0.00784841	0.0339709
HMOX1	866.855	-0.577817	0.215622	-2.67977	0.00736718	0.0324237
IGFBP4	6661.27	-0.57692	0.20546	-2.80795	0.00498581	0.0246268
LYSMD2	260.138	-0.576866	0.153671	-3.7539	0.000174108	0.00237042
ANKDD1A	91.9452	-0.574165	0.167877	-3.42015	0.000625872	0.00582441
GPR132	150.83	-0.573091	0.249097	-2.30068	0.0214099	0.0697991
RPS2	8061.89	-0.571765	0.167614	-3.4112	0.000646787	0.00595323
GSTK1	1835.62	-0.571712	0.125625	-4.55093	5.34e-06	0.000209691
TLR2	609.007	-0.571277	0.220682	-2.58869	0.00963406	0.039236
ZFYVE28	103.16	-0.570646	0.20517	-2.78134	0.00541358	0.0261825
FAM117A	443.173	-0.570557	0.230709	-2.47306	0.0133963	0.0497109
RPL23	10070.9	-0.570005	0.155957	-3.65488	0.000257302	0.00314718
TGIF2	1086.67	-0.569834	0.224142	-2.54229	0.0110128	0.0432147
SEC61G	1072.34	-0.563522	0.161401	-3.49143	0.000480435	0.00483733
TMEM8B	204.417	-0.563122	0.215774	-2.60978	0.00906011	0.0376512
CEBPB	1498.84	-0.561611	0.19081	-2.9433	0.00324729	0.0183028
RPS14	13615.8	-0.559819	0.167357	-3.34505	0.000822665	0.00707484
S1PR5	714.847	-0.558522	0.214888	-2.59913	0.00934609	0.0383958
UBA7	1177.26	-0.557388	0.212081	-2.62819	0.00858412	0.0362149
IRF3	1544.9	-0.5565	0.128664	-4.32523	1.52e-05	0.00043313
HDAC11	545.254	-0.556099	0.170296	-3.26547	0.00109281	0.00856952
RPS16	13820.2	-0.547511	0.164947	-3.31932	0.000902373	0.00752388
SFI1	490.903	-0.545111	0.148845	-3.66228	0.00024998	0.0030658
HSPB11	537.048	-0.544279	0.13011	-4.18321	2.87e-05	0.000667062
PNRC1	2341.46	-0.544199	0.173392	-3.13855	0.00169783	0.0116113
RPL14	5517.42	-0.543589	0.180706	-3.00814	0.00262848	0.0158166
MITD1	277.247	-0.54346	0.118195	-4.59799	4.27e-06	0.000179387
RPS3	20225.5	-0.542055	0.1796	-3.01812	0.00254347	0.015447
IER5L	568.371	-0.541944	0.216384	-2.50455	0.0122608	0.0467362
TMEM219	1418.08	-0.539155	0.123749	-4.35683	1.32e-05	0.000390865
PARP6	887.772	-0.538288	0.137325	-3.91981	8.86e-05	0.00145075
BST2	4520.82	-0.536828	0.245221	-2.18916	0.0285851	0.0863154
WDR54	310.403	-0.536341	0.217761	-2.46298	0.0137787	0.0507802
ABCA2	1245.21	-0.536072	0.222495	-2.40936	0.0159805	0.0564553
PIK3IP1	1077.5	-0.535561	0.185652	-2.88475	0.00391722	0.020806
KIFC2	475.964	-0.535507	0.247852	-2.16059	0.0307266	0.0907349
FBXO32	777.991	-0.533072	0.22624	-2.35622	0.0184619	0.0625808
MAN2C1	747.382	-0.524574	0.11715	-4.47781	7.54e-06	0.000267814
RPL29	8017.34	-0.52418	0.193319	-2.71148	0.00669834	0.0303845
HINT1	4495.29	-0.522974	0.139082	-3.76017	0.000169796	0.00233725
BAG1	2231.13	-0.520497	0.172861	-3.01107	0.00260328	0.0156856
RPL5	14685.4	-0.519438	0.144044	-3.6061	0.000310831	0.00360373
MSRB2	251.222	-0.517057	0.195437	-2.64564	0.00815364	0.0350028
ANAPC16	1842.35	-0.511024	0.0996474	-5.12832	2.92e-07	2.88e-05
AKR1B1	1323.12	-0.510197	0.193964	-2.63037	0.00852923	0.036033
ACADVL	4920.98	-0.507836	0.156551	-3.2439	0.00117904	0.0089999
TTYH2	120.428	-0.505196	0.220933	-2.28665	0.0222164	0.071626
RPL4	19519.9	-0.504519	0.150822	-3.34512	0.000822474	0.00707484
ATP5G1	1347.2	-0.499683	0.175463	-2.8478	0.00440227	0.0225968
SMAP2	1301.17	-0.495855	0.143601	-3.45301	0.00055436	0.00534676
IRF1	3222.21	-0.49534	0.218588	-2.26609	0.0234461	0.0746367
DUSP5	1228.5	-0.494769	0.230503	-2.14647	0.0318351	0.0930343
VEGFB	1203.91	-0.492407	0.146602	-3.35881	0.000782803	0.0068542
COX6B1	3675.39	-0.492006	0.153453	-3.20624	0.00134482	0.00985201
RPL27	10870.8	-0.491619	0.147095	-3.34218	0.000831246	0.00711206
COX7C	3099.84	-0.491303	0.149876	-3.27806	0.00104522	0.00830531
SMYD3	188.898	-0.488939	0.18216	-2.68411	0.00727221	0.0321447
RPL10A	8713.85	-0.484744	0.136298	-3.55649	0.000375836	0.004114
WDR13	1461.09	-0.484086	0.140059	-3.45631	0.000547629	0.00531488
C9orf72	337.56	-0.481852	0.16037	-3.00463	0.00265903	0.0159325
RRAS	876.892	-0.479871	0.188761	-2.54222	0.0110151	0.0432147
ZP3	287.046	-0.478281	0.202825	-2.35809	0.0183691	0.0623468
FTL	31203.7	-0.477516	0.187586	-2.54559	0.0109095	0.0429229
RPS15A	9740.39	-0.477391	0.159927	-2.98506	0.00283523	0.016663
PPP1R16A	664.916	-0.477324	0.137994	-3.45902	0.000542145	0.00527613
ABHD14A	142.33	-0.476487	0.161977	-2.94169	0.00326425	0.0183645
SLC27A1	449.282	-0.471553	0.173282	-2.72131	0.00650247	0.0297388
SQSTM1	10869.3	-0.469925	0.158049	-2.97329	0.00294622	0.0170676
LETMD1	730.968	-0.46693	0.134606	-3.46886	0.000522665	0.00514942
SRGAP3	340.118	-0.464319	0.213732	-2.17244	0.0298227	0.0888381
TOP1MT	680.791	-0.464173	0.202387	-2.29349	0.0218196	0.07077
RPL22	5870.22	-0.463946	0.137588	-3.372	0.000746252	0.00661311
SERPINB6	1675.47	-0.462798	0.183654	-2.51994	0.0117374	0.0452205
UFC1	1434.13	-0.458928	0.123566	-3.71404	0.000203977	0.00262765
IMMP2L	64.2378	-0.455113	0.165272	-2.75372	0.00589225	0.0278368
ATP5D	1602.48	-0.454883	0.186549	-2.4384	0.0147523	0.0532985
CRELD1	361.273	-0.453853	0.148685	-3.05245	0.00226982	0.0142525
RPS5	12453.9	-0.452008	0.170562	-2.65011	0.00804651	0.03465
THAP8	116.35	-0.451377	0.196886	-2.29258	0.021872	0.0708526
CAPG	5150.69	-0.451323	0.151203	-2.98488	0.00283691	0.016663
ARL6IP5	2176.19	-0.450343	0.144597	-3.11447	0.00184278	0.0123132
RPS23	11303.5	-0.446696	0.164514	-2.71525	0.00662259	0.0301303
RPL6	6118.34	-0.444747	0.133329	-3.33571	0.000850819	0.0072456
EEF1G	12808.2	-0.441733	0.155202	-2.84619	0.00442463	0.0226925
SYNGR2	6523	-0.437736	0.161356	-2.71286	0.00667048	0.0302956
RNF215	170.562	-0.435431	0.135992	-3.20189	0.0013653	0.00993745
CCDC28A	420.754	-0.43166	0.119428	-3.61439	0.000301054	0.00352299
KSR1	1010.78	-0.426625	0.166538	-2.56173	0.0104153	0.0414444
PLEKHO2	932.904	-0.421962	0.165767	-2.54552	0.0109116	0.0429229
FBL	4782.21	-0.419534	0.173699	-2.41529	0.0157226	0.0557804
MMP24	177.417	-0.417981	0.192238	-2.17429	0.0296831	0.0885518
GALT	361.01	-0.416941	0.130706	-3.18991	0.00142317	0.0102367
CBX7	1055.16	-0.415116	0.197107	-2.10605	0.0352001	0.0999462
ACADS	500.971	-0.41474	0.154548	-2.68356	0.00728424	0.0321589
SERTAD1	738.763	-0.41451	0.157158	-2.63754	0.00835086	0.0355333
ABHD14B	1016.38	-0.411753	0.153133	-2.68886	0.00716964	0.0318069
CIB1	2768.03	-0.4049	0.175196	-2.31113	0.0208257	0.0684085
POLB	452.588	-0.404303	0.152905	-2.64414	0.00818985	0.0351336
EIF3K	4333.18	-0.402301	0.147467	-2.72807	0.00637065	0.0293187
RPL35A	14085.6	-0.402107	0.16342	-2.46057	0.0138716	0.0510818
DEF6	1009.93	-0.402054	0.138879	-2.895	0.0037916	0.0202808
RPL3	27984.4	-0.401376	0.136736	-2.9354	0.00333114	0.0185812
NAP1L1	6476.23	-0.400159	0.125374	-3.19172	0.00141426	0.0101956
CSRP1	3838.17	-0.399951	0.117529	-3.40301	0.000666489	0.0060857
ZNF846	70.4527	-0.399887	0.157092	-2.54555	0.0109105	0.0429229
COX5B	2276.52	-0.39955	0.175899	-2.27147	0.0231187	0.0738084
PIM3	2679.43	-0.39943	0.15211	-2.62593	0.00864128	0.0363974
ST6GALNAC6	1012.31	-0.398702	0.125786	-3.16968	0.00152607	0.0107576
TARSL2	240.322	-0.398314	0.14526	-2.74207	0.00610528	0.0284908
RNF122	223.471	-0.398237	0.182651	-2.18032	0.0292341	0.0875827
MAST3	385.266	-0.39659	0.133316	-2.97481	0.0029317	0.0170156
GNB2L1	24700.9	-0.396347	0.143324	-2.7654	0.00568538	0.0271109
RPL7A	10332.5	-0.395734	0.159695	-2.47806	0.0132099	0.0491684
EFHC1	176.691	-0.393	0.178351	-2.20352	0.0275581	0.084017
HAUS4	1087.2	-0.392741	0.145732	-2.69495	0.0070399	0.0313597
HMGN4	1443.58	-0.391251	0.0941065	-4.15753	3.22e-05	0.000717417
ST6GALNAC4	473.608	-0.390789	0.1459	-2.67847	0.00739596	0.032488
MRPL24	1034.19	-0.388457	0.145476	-2.67025	0.00757937	0.0331349
NDUFB3	758.5	-0.38841	0.144888	-2.68076	0.0073455	0.0323361
RAB13	1335.46	-0.38663	0.127214	-3.03922	0.00237194	0.0147073
AES	8116.5	-0.386181	0.123828	-3.1187	0.00181651	0.012182
PRDX5	4804.28	-0.385615	0.166669	-2.31366	0.0206862	0.0680446
TFEB	569.667	-0.379068	0.150813	-2.5135	0.011954	0.0458722
FAM127B	1133.05	-0.378913	0.176473	-2.14715	0.0317816	0.0929371
OGFR	1484.72	-0.378776	0.14183	-2.67064	0.00757059	0.033107
TSNARE1	298.447	-0.37837	0.161468	-2.34332	0.0191131	0.0642901
CISH	334.454	-0.377668	0.175495	-2.15201	0.0313963	0.0920537
RPSAP58	10004	-0.377541	0.172541	-2.18812	0.0286606	0.0864296
IFT74	254.751	-0.377135	0.132208	-2.8526	0.00433637	0.0224027
MGC16275	32.2166	-0.374199	0.147647	-2.53442	0.0112634	0.0438741
TMEM53	188.033	-0.37366	0.122091	-3.06051	0.00220964	0.0139944
TAPBP	9382.77	-0.373116	0.171948	-2.16994	0.0300117	0.0892417
MYPOP	236.961	-0.371556	0.12199	-3.0458	0.00232063	0.0144872
TP53TG1	317.118	-0.369767	0.170971	-2.16275	0.0305607	0.0904051
XPC	940.986	-0.369315	0.114716	-3.21938	0.0012847	0.00956406
ERGIC3	4168.88	-0.369142	0.141548	-2.60789	0.0091103	0.0377827
CRYL1	258.372	-0.368307	0.172048	-2.14072	0.0322963	0.0939476
IFT46	315.658	-0.367709	0.130525	-2.81716	0.00484498	0.0241131
MZF1	303.247	-0.367065	0.148052	-2.4793	0.0131641	0.0490246
MFSD10	1422.6	-0.365958	0.14709	-2.48799	0.0128468	0.0483305
TMEM147	1161.34	-0.362701	0.135155	-2.68358	0.00728378	0.0321589
BCAT2	1135.07	-0.362048	0.148165	-2.44355	0.0145435	0.0527847
COX6A1	2364.86	-0.360928	0.162429	-2.22206	0.0262793	0.0812669
MIB2	804.714	-0.354776	0.155703	-2.27855	0.0226941	0.072846
MGST2	939.512	-0.354609	0.148879	-2.38186	0.0172253	0.0596972
RABGGTB	753.224	-0.35453	0.126802	-2.79594	0.0051749	0.0253289
NDUFV1	3193.67	-0.352917	0.165435	-2.13327	0.0329024	0.0951522
COX7A2	1951.39	-0.35255	0.144503	-2.43974	0.014698	0.0531745
ZNHIT1	1138.98	-0.351051	0.156642	-2.24111	0.0250192	0.0781478
RBPJ	641.618	-0.351027	0.142257	-2.46756	0.0136037	0.0503074
EFCAB7	128.618	-0.347332	0.128554	-2.70185	0.00689559	0.0308895
ATP5O	3516.96	-0.347234	0.146253	-2.37419	0.0175873	0.060573
RPLP0	22069.2	-0.347164	0.156594	-2.21697	0.0266249	0.0819622
STX4	955.558	-0.344246	0.121577	-2.8315	0.00463308	0.0234209
METTL5	519.47	-0.343492	0.119397	-2.8769	0.00401604	0.0211957
GRHPR	1578.19	-0.340672	0.102306	-3.32995	0.000868621	0.00734941
UNC119	564.502	-0.339892	0.118681	-2.86391	0.00418452	0.0218585
ARHGEF1	2277.04	-0.336082	0.127206	-2.64202	0.00824137	0.0352631
CAMLG	634.912	-0.335089	0.118089	-2.8376	0.00454542	0.0230988
ZNF605	331.402	-0.333487	0.130291	-2.55955	0.0104807	0.0416209
PMM1	642.433	-0.330549	0.132065	-2.50293	0.012317	0.0468628
CYC1	3563.94	-0.328399	0.149808	-2.19213	0.0283702	0.0858503
PSMB4	5371.48	-0.322357	0.0967579	-3.33158	0.000863542	0.00732203
POLD4	1307.84	-0.320476	0.147316	-2.17543	0.0295976	0.0883686
EEF1A1	56219.4	-0.313294	0.140058	-2.23689	0.0252935	0.0788245
AGAP3	1293.37	-0.307183	0.141511	-2.17073	0.0299514	0.0891348
UBAC1	1987.69	-0.307171	0.132019	-2.32673	0.0199799	0.0663763
PSMD13	2805.62	-0.305973	0.121223	-2.52406	0.0116008	0.0448431
AK2	3297	-0.303505	0.101498	-2.99024	0.00278755	0.0164929
COX19	364.829	-0.298984	0.109615	-2.72757	0.00638019	0.0293479
MAGED2	2368.56	-0.298724	0.13958	-2.14017	0.0323412	0.094023
POLR1D	2140.24	-0.294444	0.123971	-2.3751	0.0175442	0.0604911
SERTAD3	727.572	-0.293946	0.127336	-2.30843	0.0209752	0.0688102
DYNC2LI1	199.291	-0.293749	0.126101	-2.32946	0.0198345	0.0660075
TMEM39B	508.73	-0.291187	0.107724	-2.70307	0.00687015	0.0308358
LACTB	329.442	-0.289172	0.12286	-2.35368	0.0185886	0.0628961
PBXIP1	2284.23	-0.284241	0.132531	-2.14472	0.0319754	0.0932956
HEXIM1	1345.47	-0.282425	0.0902334	-3.12994	0.00174839	0.0118685
PEF1	2392.23	-0.280838	0.0925799	-3.03346	0.00241765	0.0148739
MLLT6	3633.34	-0.277809	0.106864	-2.59964	0.00933212	0.0383868
MAP2K2	2707.81	-0.277715	0.122061	-2.27522	0.0228929	0.0733172
CHST12	365.872	-0.276886	0.123142	-2.24852	0.0245431	0.0770808
HMGCL	781.939	-0.270144	0.122129	-2.21196	0.0269694	0.0826474
NME7	182.167	-0.269007	0.121798	-2.20862	0.0272008	0.0832044
BBS4	236.7	-0.264229	0.114057	-2.31664	0.0205231	0.0676174
ATP5A1	11340.7	-0.262131	0.113349	-2.3126	0.0207448	0.068213
KIAA0141	745.469	-0.25733	0.117053	-2.19841	0.02792	0.0848522
OAZ2	1302.44	-0.255769	0.0907413	-2.81866	0.00482243	0.0240455
TMEM9	1454.25	-0.253943	0.11337	-2.23995	0.0250944	0.0783293
BRE	506.315	-0.245328	0.107879	-2.27409	0.0229605	0.0734937
ERI3	1120.3	-0.243534	0.100634	-2.41999	0.015521	0.0553221
MORF4L1	2508.06	-0.239508	0.084749	-2.82608	0.00471215	0.0236964
TIA1	1245.37	-0.228821	0.10821	-2.11459	0.0344645	0.0983514
IKBKB	1096.78	-0.225428	0.0984928	-2.28877	0.0220925	0.0713523
CRIPT	375.759	-0.217738	0.101594	-2.14321	0.0320959	0.0935876
GNAI2	5316.13	-0.195489	0.0908005	-2.15295	0.0313225	0.0919612
HNRNPR	3701.07	0.164535	0.0541956	3.03596	0.00239775	0.0148023
TSN	1989.03	0.167858	0.0694014	2.41865	0.0155781	0.0554287
SLC25A44	886.404	0.172524	0.0729564	2.36475	0.018042	0.0616104
CPSF7	2280.46	0.192694	0.0786089	2.45131	0.0142339	0.0521019
POLR3B	362.492	0.19488	0.0819431	2.37823	0.0173958	0.0601003
UPF1	3261.1	0.199468	0.0781318	2.55296	0.010681	0.0422244
RNF4	1453.9	0.202867	0.0822223	2.46729	0.0136138	0.0503143
LASP1	5632.51	0.208224	0.0928362	2.24292	0.0249022	0.0779312
ZMPSTE24	1362.87	0.20871	0.0870557	2.39743	0.0165104	0.0579031
XPO1	4584.52	0.209461	0.0769166	2.72322	0.00646492	0.0296336
USP7	2891.21	0.214194	0.0894927	2.39342	0.0166921	0.058373
SF3B4	2595.15	0.228179	0.0903393	2.5258	0.0115435	0.0446767
MAML1	1468.65	0.228606	0.0990294	2.30847	0.020973	0.0688102
MTMR2	606.656	0.228958	0.107208	2.13565	0.0327078	0.0947009
BRD1	1067.08	0.230741	0.09965	2.31551	0.0205849	0.0677844
RNF40	2470.23	0.23188	0.0922412	2.51384	0.0119423	0.0458369
INTS7	846.375	0.237216	0.108159	2.19321	0.0282921	0.0856565
TOP3A	655.323	0.237545	0.109594	2.16749	0.0301974	0.0896342
ZNF207	3543.38	0.238989	0.0604647	3.95255	7.73e-05	0.00133246
NIPA2	1094.67	0.243564	0.101237	2.40589	0.0161331	0.0568986
CRCP	874.762	0.245431	0.0776047	3.16258	0.00156377	0.0109434
PAXIP1	449.137	0.245514	0.11214	2.18936	0.0285709	0.0863154
ABL1	2072.16	0.246825	0.116158	2.12491	0.0335937	0.096694
HCFC1	3005.02	0.247475	0.0973987	2.54084	0.0110586	0.0432691
CHTF8	2628.13	0.248585	0.0813614	3.05532	0.00224821	0.014162
SP2	646.464	0.253457	0.0865026	2.93004	0.00338913	0.018762
CRAMP1L	769.081	0.254956	0.116246	2.19324	0.02829	0.0856565
PHRF1	1648.4	0.255068	0.109402	2.33147	0.0197287	0.0657682
LYPLA1	1386.59	0.257103	0.108852	2.36194	0.0181797	0.0619563
ZC3H4	1262.54	0.257356	0.093806	2.74349	0.00607892	0.028375
PCNXL3	2029.91	0.25738	0.0938997	2.74101	0.00612509	0.0285376
KPNB1	5606.62	0.258116	0.0886447	2.9118	0.00359353	0.0194818
AHCTF1	1210.25	0.258405	0.0982596	2.62982	0.0085431	0.0360833
SRCAP	4412.69	0.259767	0.116214	2.23524	0.0254017	0.0790821
XPOT	1938.22	0.261564	0.0938551	2.7869	0.00532157	0.0258603
ZCCHC2	476.01	0.262257	0.122122	2.1475	0.0317537	0.0928852
UTP15	366.064	0.262267	0.0963187	2.72291	0.00647095	0.029639
CDV3	4526.42	0.262445	0.103828	2.52769	0.0114817	0.044488
CHD1	868.149	0.264243	0.122369	2.1594	0.0308188	0.0909191
KCTD5	1241.49	0.265388	0.101969	2.60263	0.00925112	0.038151
OTUD6B	319.355	0.265529	0.112292	2.36463	0.018048	0.0616104
C6orf106	4230.78	0.266429	0.114546	2.32595	0.0200211	0.0664531
PRKCH	1039.25	0.267098	0.108069	2.47155	0.0134528	0.0498499
RAB6A	2849.75	0.270928	0.114066	2.37518	0.0175403	0.0604911
G3BP2	2809.82	0.271097	0.106059	2.55609	0.0105857	0.0419471
SEC61A1	10037.4	0.271369	0.107579	2.52252	0.0116517	0.0450041
E2F4	1474.23	0.275073	0.129944	2.11685	0.0342723	0.0980265
USP14	1610.49	0.276021	0.11296	2.44353	0.0145442	0.0527847
C12orf49	554.798	0.27698	0.10213	2.71205	0.00668694	0.0303403
ATMIN	1291.95	0.277288	0.104966	2.64169	0.00824926	0.0352729
CHERP	1750.72	0.279185	0.0870659	3.20659	0.00134318	0.00985201
TMEM104	666.059	0.280363	0.0941191	2.97881	0.00289367	0.0168881
TMEM87A	1626.33	0.280558	0.103192	2.7188	0.00655199	0.0298759
CNOT6	1396.3	0.281009	0.109578	2.56446	0.0103336	0.0412603
UBN1	1881.82	0.281219	0.0919673	3.05782	0.00222954	0.0140815
HSPA8	20582.1	0.2815	0.128532	2.19012	0.0285159	0.0862059
CBFB	1289.19	0.28225	0.114379	2.46769	0.0135989	0.0502999
MTFR1	724.712	0.282451	0.13086	2.15842	0.030895	0.0910414
LARP4B	1704.57	0.282462	0.0907841	3.11137	0.00186224	0.0123841
NCAPD2	4247.32	0.28257	0.131438	2.14983	0.0315685	0.0924468
C5orf22	647.218	0.283163	0.107296	2.63909	0.00831285	0.0354127
VPRBP	842.616	0.286255	0.124823	2.2933	0.0218309	0.0707729
CEP350	1406.32	0.28666	0.122203	2.34576	0.0189884	0.0639833
DNMT1	3967.67	0.286748	0.110168	2.60284	0.00924554	0.038151
RBM25	1799.83	0.291548	0.0961166	3.03328	0.00241914	0.0148742
UBTD2	697.286	0.293884	0.109774	2.67717	0.00742464	0.0325906
ZC3H18	1084.91	0.294044	0.0918969	3.19972	0.00137563	0.00997715
GPR107	3245.26	0.294654	0.113339	2.59977	0.00932866	0.0383844
TBC1D14	1906.86	0.294726	0.113058	2.60686	0.00913766	0.0378534
NOL11	1158.36	0.295019	0.0936761	3.14935	0.00163633	0.0113173
BAZ1B	2564.13	0.295384	0.0875795	3.37275	0.000744213	0.0066022
DDX52	609.59	0.296366	0.0871176	3.40191	0.000669165	0.00610128
SEC63	1563.18	0.296799	0.101048	2.93722	0.00331168	0.018529
AARS	3265.65	0.298354	0.1068	2.79358	0.00521288	0.0254603
TMEM181	878.101	0.299058	0.129951	2.30131	0.0213739	0.0697434
GOLPH3	2495.64	0.299263	0.112161	2.66816	0.00762682	0.0332603
ZFR	1878.01	0.301855	0.111565	2.70564	0.00681731	0.0306963
TARS	2692.63	0.304437	0.128091	2.37673	0.0174667	0.0603114
KPNA2	4515.64	0.30499	0.120017	2.54123	0.0110463	0.0432489
MSL2	1404.16	0.305361	0.114749	2.66112	0.00778822	0.0337741
GTPBP10	288.353	0.305428	0.0775506	3.93844	8.2e-05	0.00139493
NUP98	2540.12	0.306703	0.117934	2.60063	0.00930518	0.038305
CHORDC1	410.193	0.311522	0.142833	2.18102	0.0291816	0.0874584
NSUN2	1979.27	0.312859	0.126861	2.46616	0.0136572	0.0504442
SAP130	908.74	0.31337	0.0833048	3.76173	0.000168743	0.0023245
TDRD7	654.642	0.313624	0.147547	2.12559	0.0335372	0.0965617
UGGT1	2222.26	0.315526	0.11105	2.84129	0.00449317	0.0229286
WDR43	1084.32	0.317246	0.112619	2.81698	0.00484773	0.0241203
BDP1	820.571	0.317593	0.140429	2.2616	0.0237223	0.0752509
ACTN4	14212.6	0.318007	0.107463	2.95923	0.00308412	0.0176714
RABGAP1	1772.07	0.318179	0.13072	2.43404	0.0149311	0.0537738
CTCF	1533.81	0.318314	0.0783027	4.06517	4.8e-05	0.0009422
AMFR	1802.15	0.318372	0.11884	2.679	0.00738419	0.0324674
ASAP1	1171.56	0.319976	0.13707	2.3344	0.0195749	0.0653652
KHSRP	3577.75	0.320075	0.096997	3.29985	0.000967373	0.00790409
TMED10P1	50.0177	0.32136	0.136243	2.35873	0.0183374	0.0622854
LRRC59	3553.52	0.321708	0.123787	2.59889	0.0093527	0.0384144
TTF2	763.544	0.322441	0.146314	2.20377	0.0275409	0.083995
CAPRIN1	5972.6	0.324101	0.118983	2.72393	0.006451	0.0295774
LETM1	1563.42	0.32523	0.104701	3.10628	0.00189457	0.0125133
TRUB1	462.085	0.326518	0.133473	2.44633	0.014432	0.0525021
MGA	1471.25	0.32659	0.147383	2.21594	0.0266959	0.0820856
NAA15	1383.93	0.326711	0.125578	2.60165	0.00927759	0.0382258
DHTKD1	988.034	0.327105	0.121017	2.70297	0.00687225	0.0308377
ZFYVE21	756.148	0.327553	0.137932	2.37474	0.0175613	0.060535
PPP3CA	1197.42	0.327816	0.13137	2.49537	0.0125825	0.0475823
PBRM1	1307.67	0.328371	0.150901	2.17607	0.0295501	0.0882816
ARHGEF11	1105.89	0.331235	0.123957	2.67218	0.00753594	0.0329922
TOB2	1298.89	0.331472	0.112939	2.93496	0.00333588	0.018602
NCBP1	1230.12	0.331498	0.0964487	3.43704	0.0005881	0.00557252
TANC1	1283.33	0.331522	0.153215	2.16377	0.0304819	0.0902323
TRIM25	1767.53	0.331555	0.117716	2.81656	0.0048541	0.0241388
PTAR1	843.11	0.33171	0.142365	2.33	0.0198062	0.0659654
C2orf69	390.231	0.331846	0.103704	3.19993	0.0013746	0.00997358
GSTCD	330.672	0.33208	0.1433	2.31738	0.020483	0.0675458
RAB3GAP1	1654.73	0.332188	0.0990619	3.35333	0.000798449	0.00693489
SPTAN1	6264.33	0.332189	0.110909	2.99516	0.00274304	0.0163185
CDK13	1143.13	0.332544	0.104686	3.1766	0.00149013	0.0105774
SETD1B	1053.49	0.332638	0.119692	2.77911	0.00545073	0.0263067
GATAD2A	2069.45	0.333783	0.0993842	3.35852	0.000783618	0.00685806
LARP1	5089.25	0.334065	0.1015	3.29128	0.000997311	0.00804784
ZFP91	2740.13	0.334907	0.110822	3.02203	0.0025109	0.015305
NUP50	1973.35	0.335319	0.0938487	3.57297	0.000352952	0.00393017
XPO5	1402.61	0.335831	0.102295	3.28296	0.00102722	0.0082137
TRAM2	1041.11	0.33648	0.159054	2.1155	0.034387	0.0982372
WWP2	1197.35	0.336511	0.107325	3.13544	0.00171596	0.0117013
YY1	1384.97	0.336558	0.110603	3.04293	0.00234285	0.0145812
PGAM5	821.515	0.338826	0.104492	3.24262	0.00118437	0.00902391
TBCCD1	537.013	0.339236	0.130224	2.60503	0.00918673	0.0379966
PHF2	1304.38	0.339592	0.123395	2.75207	0.00592199	0.0279265
LRIG2	214.734	0.339613	0.13258	2.56158	0.0104197	0.0414505
NPC1	1581.68	0.341595	0.131849	2.59081	0.0095749	0.0390732
ZFX	517.94	0.347975	0.154856	2.24709	0.024634	0.0773445
CPNE2	837.541	0.348906	0.145229	2.40245	0.0162857	0.0573457
DMXL1	837.08	0.349104	0.152976	2.28209	0.0224842	0.0723115
TOPBP1	2361.93	0.349896	0.159437	2.19457	0.0281945	0.0854881
KRIT1	605.877	0.350151	0.109939	3.18495	0.00144779	0.0103574
SNX12	253.096	0.350801	0.136884	2.56276	0.0103844	0.0413818
SYNJ1	363.294	0.350963	0.141234	2.48496	0.0129565	0.0485184
PALB2	575.36	0.351132	0.112942	3.10897	0.00187741	0.0124477
BCOR	979.023	0.351388	0.146885	2.39227	0.0167446	0.0585231
SMG7	2671.95	0.352955	0.0914287	3.86043	0.000113186	0.00174099
GNAQ	1195.85	0.354227	0.124228	2.85143	0.00435229	0.0224344
MED1	1348.12	0.354929	0.109234	3.24927	0.00115701	0.00887653
DDX6	2533.85	0.355394	0.103659	3.42848	0.00060698	0.00569549
SLC38A1	3841.45	0.357519	0.151155	2.36525	0.0180181	0.0615656
CREBBP	2616.54	0.357758	0.132801	2.69394	0.00706132	0.031417
STIP1	4115.15	0.361165	0.112863	3.20002	0.00137418	0.00997358
PAPD5	299.19	0.361256	0.122217	2.95586	0.00311797	0.0177872
MTDH	3197.37	0.361533	0.0991573	3.64606	0.000266295	0.00322278
LIN52	191.685	0.361961	0.169113	2.14035	0.0323267	0.0940213
MARK2	2118.13	0.365171	0.105431	3.46361	0.000532977	0.00522574
PDPK1	1292.4	0.365236	0.138168	2.64343	0.00820717	0.0351914
TUBA1C	12612.6	0.365471	0.136109	2.68514	0.00724995	0.0320813
DAG1	3552.94	0.36632	0.130425	2.80866	0.00497481	0.0245791
CASKIN2	691.822	0.367801	0.114751	3.20519	0.00134971	0.0098751
RMI1	638.97	0.369183	0.144732	2.5508	0.0107476	0.0424236
GTF3C1	2890.18	0.369209	0.109218	3.38048	0.000723586	0.0064577
HEATR1	1116.97	0.370908	0.127802	2.90221	0.00370543	0.0199302
NUP153	2005.65	0.372511	0.156923	2.37384	0.0176041	0.0605916
FAM111B	1148.67	0.375195	0.161329	2.32564	0.0200375	0.0664883
HIPK1	1976.73	0.37687	0.143642	2.62367	0.0086987	0.0365804
YIPF6	255.414	0.377216	0.128239	2.94151	0.00326612	0.0183694
STIL	745.483	0.379361	0.14323	2.64861	0.0080824	0.0347703
TMEM14A	783.033	0.379368	0.168294	2.2542	0.0241839	0.0763125
GNA11	565.314	0.379466	0.165443	2.29363	0.0218116	0.0707565
PKN2	1366.1	0.380512	0.114321	3.32846	0.000873275	0.00737152
UHRF1	1171.24	0.381359	0.142317	2.67965	0.00736993	0.0324281
SLC30A1	269.076	0.381733	0.180133	2.11918	0.0340756	0.0975603
SLC31A1	1378.37	0.381962	0.125231	3.05005	0.00228802	0.01433
POLR1B	632.349	0.382035	0.0985784	3.87544	0.000106431	0.00166361
CHML	567.611	0.382086	0.157616	2.42416	0.0153438	0.0549362
PAQR3	296.151	0.382154	0.145184	2.63221	0.00848304	0.0359539
GSPT1	3270.88	0.383309	0.0970156	3.95101	7.78e-05	0.00133981
SYNE2	4744.16	0.384778	0.16847	2.28395	0.0223745	0.0720226
EIF4G2	21383.5	0.38698	0.117019	3.30698	0.000943066	0.00777129
ZNF518A	399.203	0.387423	0.151484	2.55752	0.0105422	0.0417974
ARHGAP12	449.173	0.387567	0.1271	3.0493	0.00229374	0.0143584
NACC1	2089.29	0.388836	0.110334	3.52416	0.000424833	0.00444563
SELT	2015.9	0.389804	0.106693	3.65352	0.000258672	0.00315552
VANGL1	1148.82	0.390226	0.128129	3.04557	0.00232243	0.0144935
TRIM59	574.832	0.394663	0.18524	2.13055	0.0331258	0.0956777
URB2	433.701	0.395725	0.11451	3.45581	0.000548641	0.00531488
PSKH1	815.367	0.395863	0.118958	3.32774	0.000875523	0.00737152
ZBTB26	68.1922	0.397916	0.177903	2.2367	0.0253061	0.078829
BRD4	2429	0.399176	0.114921	3.47348	0.000513753	0.00509171
NIPA1	672.142	0.401536	0.13084	3.06891	0.00214842	0.0137298
KLF6	3563.49	0.404613	0.178555	2.26604	0.0234491	0.0746367
ABL2	755.915	0.405635	0.144582	2.80557	0.00502281	0.0247651
RASA1	775.607	0.406078	0.128292	3.16526	0.00154946	0.0108718
STK35	1354.59	0.407278	0.0987554	4.12411	3.72e-05	0.000796243
IARS	3218.44	0.40935	0.117373	3.48759	0.000487397	0.00488843
CLIC4	3644.67	0.40967	0.149202	2.74574	0.00603755	0.0282394
BCAR1	1755.53	0.41205	0.184234	2.23656	0.0253149	0.0788431
ZNF217	1356.91	0.416533	0.159849	2.60578	0.00916642	0.0379297
AQR	1087.45	0.418663	0.125949	3.32407	0.000887143	0.00742052
ANAPC1	707.471	0.420267	0.122986	3.4172	0.000632681	0.00585573
POP1	298.389	0.420796	0.138501	3.03821	0.00237985	0.0147303
GPATCH8	1370.67	0.420879	0.11153	3.77368	0.000160859	0.00224455
ACTL6A	2441.94	0.423067	0.125744	3.36451	0.000766805	0.00673664
MBNL1	4353.61	0.425958	0.100882	4.22234	2.42e-05	0.000587147
USP6NL	745.691	0.426269	0.155023	2.74971	0.00596475	0.0280688
GPSM2	1547.36	0.428476	0.133543	3.20853	0.00133417	0.00982017
SLC25A13	618.934	0.430922	0.113674	3.79086	0.000150126	0.00212793
ZBTB34	344.589	0.431374	0.120972	3.56589	0.000362628	0.00401739
SPIN1	2070.4	0.433188	0.122544	3.53496	0.000407842	0.00432742
CTTNBP2NL	1141.3	0.434389	0.135864	3.19722	0.00138758	0.0100241
KIAA1524	619.988	0.435779	0.172959	2.51955	0.0117504	0.0452518
ZNF710	366.969	0.436206	0.171919	2.53727	0.0111721	0.0436017
HIATL1	2023.69	0.436539	0.113658	3.8408	0.000122635	0.00185215
REV3L	586.46	0.436613	0.180008	2.42552	0.0152865	0.0547918
WDR44	479.337	0.437	0.151738	2.87996	0.00397726	0.0210374
NUP188	3116.95	0.438019	0.111831	3.91681	8.97e-05	0.00145979
SREBF2	6644.5	0.439284	0.116293	3.7774	0.000158471	0.00221799
MON1B	721.77	0.440521	0.135044	3.26205	0.0011061	0.00863364
UEVLD	227.936	0.441765	0.166688	2.65024	0.00804341	0.03465
JMY	794.97	0.443429	0.12593	3.52124	0.000429535	0.00446579
PTPN21	307.965	0.445068	0.181311	2.45472	0.0140995	0.0517237
PAWR	349.459	0.448142	0.133598	3.35441	0.000795351	0.00691454
TRAK1	1490.81	0.450637	0.132989	3.38854	0.000702657	0.00632771
LOC652276	34.6352	0.45093	0.133562	3.37618	0.000734999	0.00652917
ERBB3	2384.88	0.451534	0.184499	2.44736	0.0143909	0.0524148
ACSL3	1840.38	0.45199	0.131458	3.43829	0.000585405	0.00556135
HEATR3	262.919	0.452801	0.123251	3.67381	0.000238965	0.00296844
STRN3	702.631	0.453446	0.169904	2.66884	0.00761134	0.033235
SPRED2	710.715	0.453554	0.1559	2.90926	0.00362284	0.0195943
MAPK1	3230.92	0.453624	0.0982814	4.61557	3.92e-06	0.000171655
FAM83D	1373.97	0.453985	0.170377	2.66459	0.00770811	0.0335378
TOP1	2153.77	0.454176	0.106412	4.26809	1.97e-05	0.000509133
SHCBP1	436.551	0.456692	0.154637	2.95332	0.00314375	0.0178897
OGFOD1	805.744	0.458689	0.115856	3.95912	7.52e-05	0.00130275
ECT2	2553.52	0.459668	0.182689	2.51612	0.0118655	0.0455991
CYP51A1	1376.36	0.460622	0.170065	2.7085	0.00675887	0.0305156
TJP2	2994.64	0.461005	0.156609	2.94367	0.00324347	0.0182869
USP10	1613.79	0.461371	0.107501	4.29178	1.77e-05	0.000478618
TYRO3	475.867	0.465835	0.170179	2.73732	0.00619416	0.02873
SLC35A5	695.612	0.468611	0.127477	3.67604	0.000236883	0.00294858
ARID1A	3269.33	0.469494	0.115874	4.05175	5.08e-05	0.000972961
DOCK9	1778.64	0.472406	0.190993	2.47342	0.0133828	0.0496907
CPEB2	434.288	0.474104	0.214093	2.21447	0.0267964	0.0822556
RFWD3	1531.85	0.474482	0.127936	3.70875	0.000208289	0.00266874
ITPR3	5366.3	0.475392	0.190468	2.49591	0.0125634	0.047544
DCAF7	2979.7	0.476336	0.119882	3.97339	7.09e-05	0.00125282
CPSF2	1481.58	0.477021	0.110697	4.30925	1.64e-05	0.000454668
ACLY	2797.56	0.477663	0.128589	3.71465	0.000203481	0.0026255
ERI2	412.37	0.479193	0.112989	4.24104	2.22e-05	0.000555752
STAG1	1247.84	0.481298	0.176781	2.72257	0.0064777	0.0296551
FOXO3	1421.72	0.481859	0.144604	3.33226	0.000861442	0.00730891
ANTXR1	2137.57	0.482195	0.207578	2.32296	0.0201815	0.0668173
TULP4	844.126	0.482514	0.136747	3.52851	0.000417909	0.00439608
FAM126A	653.84	0.483079	0.183041	2.63919	0.00831047	0.0354107
AHR	1929.43	0.484472	0.193722	2.50086	0.0123893	0.0470305
ATF7IP	1097.49	0.487267	0.169161	2.88049	0.0039706	0.0210104
KPNA1	2338.76	0.487433	0.117929	4.13328	3.58e-05	0.000768949
MXRA7	1418.84	0.491621	0.185034	2.65693	0.00788562	0.0340771
MAN1A2	730.14	0.493737	0.196827	2.50849	0.012125	0.0463632
FAM120A	4840.91	0.494241	0.113642	4.34911	1.37e-05	0.000401004
TIAM1	1161.51	0.497343	0.160717	3.09452	0.00197132	0.012849
FURIN	2952.62	0.499323	0.15957	3.12918	0.00175296	0.011888
USP12	224.924	0.499641	0.222684	2.24372	0.0248502	0.077801
AP1G1	2122.17	0.501881	0.124281	4.03826	5.38e-05	0.00101701
TGFBRAP1	300.214	0.504101	0.205389	2.45437	0.0141131	0.0517629
SLC20A2	1908.13	0.506075	0.168742	2.9991	0.00270782	0.0161719
CLSPN	419.168	0.506266	0.19314	2.62124	0.00876098	0.0367496
BMP8B	128.368	0.508333	0.217337	2.33892	0.0193397	0.0647896
PLSCR1	2386.13	0.508394	0.188036	2.70371	0.00685707	0.0308072
QTRTD1	810.807	0.509689	0.118621	4.29679	1.73e-05	0.000472811
AASS	298.353	0.511029	0.233432	2.1892	0.0285824	0.0863154
MSI2	254.084	0.513302	0.172445	2.97662	0.00291446	0.0169586
GALNT3	924.959	0.515115	0.209456	2.4593	0.013921	0.051171
GPD2	2035.9	0.517179	0.16699	3.09706	0.00195448	0.0127983
LOC220729	181.267	0.518013	0.183348	2.8253	0.00472363	0.0237251
TMEM2	960.459	0.518311	0.196149	2.64243	0.00823137	0.0352457
PLEKHA7	567.96	0.523948	0.206534	2.53686	0.0111852	0.0436377
SQLE	2128.9	0.524281	0.208613	2.51318	0.0119649	0.0458945
SMC2	1957.9	0.52549	0.150549	3.4905	0.000482126	0.00484903
EPHA1	880.808	0.526239	0.180489	2.91563	0.00354966	0.0193354
SOCS6	488.08	0.530792	0.134828	3.93683	8.26e-05	0.00140042
ADAM9	2666.57	0.531022	0.185305	2.86567	0.00416133	0.0217932
PHLPP1	823.072	0.534954	0.116159	4.60536	4.12e-06	0.000175978
KLF5	7922.44	0.535242	0.189715	2.82129	0.0047831	0.02392
CIRH1A	1094.92	0.535501	0.13601	3.93723	8.24e-05	0.00140039
PAK2	3744.18	0.5381	0.121249	4.43798	9.08e-06	0.000306055
PHACTR2	624.173	0.538207	0.186081	2.89233	0.00382401	0.0204203
NRP1	994.391	0.539874	0.220189	2.45187	0.0142118	0.0520313
SLC27A4	1384.03	0.542146	0.176164	3.07752	0.00208733	0.0134097
ATP1B1	6941.43	0.542423	0.229698	2.36146	0.0182033	0.0620161
IDE	513.823	0.543012	0.195519	2.77728	0.00548161	0.0263876
EP300	2501.99	0.54425	0.167506	3.24914	0.00115756	0.00887653
F2R	711.17	0.544946	0.223934	2.43352	0.014953	0.0538313
RSC1A1	256.195	0.54701	0.196327	2.78621	0.00533275	0.0259009
CNOT1	5534.85	0.550811	0.113707	4.84413	1.27e-06	7.88e-05
ATP2B1	1232.75	0.554927	0.168769	3.28809	0.00100868	0.00810083
TMCC1	863.159	0.55825	0.131479	4.24592	2.18e-05	0.000546779
CDK12	1391.84	0.559363	0.118783	4.70913	2.49e-06	0.000125867
HIC2	206.59	0.559605	0.184439	3.0341	0.00241256	0.0148637
STRN	424.141	0.560661	0.249099	2.25075	0.0244011	0.0767808
POLQ	606.469	0.56132	0.192871	2.91034	0.00361036	0.0195499
PPL	9482.84	0.562488	0.243413	2.31084	0.0208419	0.0684464
DENND1B	111.047	0.565057	0.214728	2.6315	0.00850097	0.03598
KIAA1671	2709.22	0.565712	0.169264	3.34219	0.000831204	0.00711206
ACVR1	671.812	0.568498	0.149868	3.79333	0.000148641	0.00211758
APP	13890.5	0.570678	0.143761	3.96963	7.2e-05	0.00126662
TJP1	2624.25	0.577785	0.166483	3.47055	0.0005194	0.00513657
BRIP1	352.947	0.578187	0.218423	2.6471	0.00811858	0.034885
POLR1A	834.157	0.578792	0.154458	3.74725	0.000178786	0.00239799
RASAL2	751.662	0.581368	0.196443	2.95947	0.00308173	0.0176684
KLF9	828.84	0.583303	0.229469	2.54197	0.011023	0.043231
GNPNAT1	999.084	0.589149	0.177957	3.31063	0.000930857	0.00769836
INCENP	1005.72	0.589837	0.142207	4.14775	3.36e-05	0.000738145
NETO2	747.423	0.592355	0.174151	3.40139	0.000670441	0.00610961
AMD1	2400.82	0.593377	0.139814	4.24406	2.2e-05	0.000550586
NRP2	1220.16	0.593921	0.229769	2.58486	0.00974176	0.0395604
EXPH5	358.53	0.594149	0.198378	2.99504	0.00274408	0.0163194
CASC5	484.607	0.596171	0.236337	2.52255	0.0116508	0.0450041
OCLN	238.676	0.596182	0.255538	2.33304	0.0196458	0.0655634
ICK	743.597	0.598357	0.167391	3.57461	0.00035075	0.00392321
HIST2H2BE	459.786	0.599187	0.264186	2.26804	0.0233265	0.0743939
ANKIB1	1106.58	0.600806	0.124905	4.8101	1.51e-06	8.89e-05
C5orf51	919.214	0.600959	0.109312	5.49763	3.85e-08	7.03e-06
SENP2	1183.8	0.602089	0.144982	4.15286	3.28e-05	0.00072621
KIF21A	811.139	0.602783	0.182418	3.3044	0.000951783	0.00782315
MBOAT2	817.842	0.611306	0.258916	2.36102	0.0182246	0.0620632
SH3PXD2B	1637.39	0.612209	0.202674	3.02066	0.00252226	0.0153589
PRPF4	1441.69	0.612898	0.147985	4.14162	3.45e-05	0.000752966
FAM129A	2418.49	0.614684	0.202341	3.03787	0.00238259	0.0147385
SNTB2	903.21	0.617507	0.130281	4.7398	2.14e-06	0.00011335
ZFHX3	527.694	0.620213	0.190459	3.25641	0.00112829	0.00873248
ZSCAN12P1	17.0413	0.621969	0.26555	2.34219	0.0191707	0.0644
ESRP2	1598.19	0.622818	0.163312	3.81367	0.000136918	0.0019934
SH3D19	997.46	0.623422	0.187868	3.31841	0.000905327	0.00753138
CA13	119.409	0.628068	0.248698	2.52543	0.0115558	0.0446899
GALNT7	773.433	0.630871	0.24788	2.54507	0.0109256	0.0429598
MAL2	8907.23	0.633646	0.173397	3.6543	0.000257884	0.00315038
HIST1H2AM	7.51848	0.634246	0.301105	2.10639	0.0351702	0.099914
N4BP1	1949.99	0.637374	0.138844	4.59057	4.42e-06	0.000183362
FASN	5083.66	0.640318	0.173133	3.69842	0.000216945	0.00274702
TLE4	864.351	0.640372	0.156645	4.08805	4.35e-05	0.000884274
ZDHHC21	170.851	0.646313	0.220365	2.93292	0.00335786	0.0186735
IL22RA1	270.084	0.648812	0.282972	2.29285	0.0218566	0.0708274
HMGCR	1967.08	0.654678	0.161712	4.04841	5.16e-05	0.000983862
EFNB2	1051.21	0.656063	0.240592	2.72687	0.00639378	0.0293809
DCUN1D3	184.95	0.657319	0.161505	4.06996	4.7e-05	0.000928012
NRIP1	1377.44	0.659034	0.204551	3.22185	0.00127366	0.0095006
ADAT1	212.556	0.663507	0.214174	3.09798	0.00194847	0.0127765
SASH1	955.506	0.67873	0.241812	2.80685	0.00500279	0.0246841
GRHL1	1497.53	0.679973	0.24169	2.81341	0.00490187	0.0243066
FAM89A	300.328	0.68435	0.278476	2.45749	0.0139913	0.0513677
RSPRY1	317.877	0.697236	0.166159	4.19619	2.71e-05	0.000637234
DNMBP	687.958	0.702826	0.155517	4.51929	6.2e-06	0.000233605
ATP8B1	1674.79	0.703571	0.170158	4.1348	3.55e-05	0.000766315
STT3B	1379.29	0.704661	0.171635	4.10559	4.03e-05	0.000840656
TRPS1	677.815	0.706523	0.266998	2.64617	0.00814083	0.0349585
EHF	4156.2	0.708172	0.261487	2.70825	0.00676399	0.0305237
MAP7	1015.09	0.710517	0.173859	4.08674	4.37e-05	0.000887381
MGAT5	221.005	0.711998	0.292454	2.43457	0.0149096	0.0537069
TFAP2C	961.914	0.715967	0.192983	3.71001	0.000207254	0.0026592
LMTK2	503.178	0.716238	0.247104	2.89853	0.00374919	0.0201116
SRGAP1	336.133	0.718007	0.23269	3.08569	0.00203083	0.0131527
PPM1L	139.206	0.719674	0.300722	2.39315	0.0167042	0.0584042
SGK1	7409.89	0.731382	0.237174	3.08374	0.00204415	0.0132249
VIPR1	110.431	0.731821	0.272682	2.68379	0.00727929	0.0321589
NUP155	993.296	0.737699	0.160506	4.59609	4.3e-06	0.000180106
BCAT1	363.185	0.74092	0.286302	2.5879	0.00965637	0.0392919
DDI2	137.46	0.74103	0.297144	2.49384	0.0126368	0.0477428
MFSD2A	405.491	0.742915	0.274685	2.7046	0.00683859	0.0307619
PRR11	229.402	0.744835	0.267173	2.78783	0.00530617	0.0258081
ACTN1	4543.95	0.747695	0.214533	3.48522	0.000491739	0.00491337
ZNF462	362.1	0.75018	0.285496	2.62763	0.00859811	0.0362655
PAK1	1751.8	0.759728	0.173246	4.38526	1.16e-05	0.000366854
HIST1H2AE	36.5623	0.760208	0.346282	2.19534	0.028139	0.0853685
ATL3	742.581	0.765873	0.161822	4.73282	2.21e-06	0.000115666
SOX6	256.375	0.770992	0.312972	2.46345	0.0137607	0.0507448
C3orf58	1499.01	0.77198	0.194849	3.96194	7.43e-05	0.00129079
TET3	1296.75	0.772525	0.157009	4.92027	8.64e-07	5.93e-05
EVPL	4792.71	0.776248	0.222286	3.49212	0.000479211	0.00482951
MET	1410.2	0.776877	0.289947	2.67937	0.00737602	0.0324471
GRHL3	1656.55	0.779147	0.270932	2.8758	0.00403002	0.0212512
SPTLC2	1519.92	0.781855	0.163203	4.79068	1.66e-06	9.35e-05
HMGCS1	2903.76	0.78251	0.222594	3.51541	0.000439069	0.00453795
ACPP	395.519	0.790443	0.31018	2.54834	0.0108238	0.0426601
AMMECR1	844.067	0.791278	0.17589	4.49872	6.84e-06	0.000248208
SCN8A	35.2303	0.792682	0.333144	2.3794	0.0173408	0.0599781
DYNLT3	940.538	0.799988	0.220508	3.62793	0.000285703	0.00338833
FAM135A	869.623	0.801035	0.190236	4.21076	2.55e-05	0.00060684
MACF1	4992.97	0.803424	0.196173	4.09549	4.21e-05	0.000863999
KLF8	225.413	0.812067	0.338216	2.40103	0.0163491	0.0574696
TSHZ2	177.36	0.814239	0.317134	2.56749	0.0102438	0.0409881
CRISPLD1	146.194	0.822328	0.342371	2.40186	0.0163117	0.0573677
DPP4	109.119	0.8244	0.336764	2.44801	0.0143648	0.0523304
SULT2B1	877.544	0.830456	0.320317	2.5926	0.00952526	0.0389313
NCOA2	652.612	0.842147	0.307478	2.73889	0.00616472	0.0286423
BMP8A	130.021	0.844849	0.22139	3.81612	0.000135569	0.00198535
SLC7A11	261.046	0.846554	0.366827	2.30777	0.0210117	0.0688929
RCOR1	1466.3	0.8474	0.176304	4.80648	1.54e-06	9.02e-05
LIPH	325.195	0.855784	0.371463	2.30382	0.0212328	0.0693911
SOX21	485.991	0.856839	0.389669	2.19889	0.0278857	0.0847818
RAD54L2	180.963	0.861037	0.261275	3.29552	0.000982404	0.00799484
GTF2A1	197.63	0.870342	0.267803	3.24994	0.0011543	0.0088668
SIAH2	2084.72	0.877831	0.161451	5.43713	5.41e-08	9.03e-06
KCNE3	237.015	0.886653	0.33167	2.6733	0.00751088	0.0329061
ZDHHC20	308.079	0.898803	0.309651	2.90264	0.00370037	0.0199187
PDP2	116.02	0.89904	0.194286	4.6274	3.7e-06	0.000165189
PTGS1	921.775	0.901907	0.35242	2.55918	0.0104919	0.0416562
SCIN	285.318	0.911924	0.426709	2.13711	0.032589	0.0945443
TUBB2A	1728.84	0.912332	0.266803	3.4195	0.00062737	0.00583013
PXDN	1454.71	0.916545	0.320921	2.85599	0.00429033	0.0222464
LDLR	4045.2	0.917491	0.217378	4.22071	2.44e-05	0.000590427
CD109	2346.18	0.923028	0.219874	4.19799	2.69e-05	0.000633824
HIST1H2BE	22.7458	0.925464	0.302813	3.05622	0.00224143	0.0141371
LRRC8A	5047.63	0.932039	0.175711	5.30437	1.13e-07	1.45e-05
ISPD	26.7764	0.93939	0.283051	3.31879	0.00090407	0.00752776
POF1B	950.422	0.94645	0.347449	2.724	0.00644971	0.0295774
BDNF	50.583	0.963609	0.342447	2.81389	0.00489461	0.0242942
DNAH3	22.7867	0.966707	0.363153	2.66198	0.00776822	0.0337273
ABCA1	1128.15	0.99178	0.242934	4.08251	4.46e-05	0.000898931
HIST1H3H	27.1124	1.00392	0.332624	3.01818	0.00254302	0.015447
ARC	26.4439	1.00542	0.469587	2.14108	0.0322677	0.0939165
RAP1GAP2	527.191	1.01431	0.232395	4.3646	1.27e-05	0.000383464
SCD	10684.1	1.04131	0.2227	4.67585	2.93e-06	0.000141244
MAP3K9	228.779	1.0519	0.221104	4.75749	1.96e-06	0.00010696
HIF1A	4994.45	1.05516	0.204106	5.16965	2.35e-07	2.44e-05
PPFIA1	1384.79	1.05997	0.206523	5.13246	2.86e-07	2.83e-05
LRRC8E	522.5	1.06445	0.241161	4.41386	1.02e-05	0.00033246
KLF4	4060.74	1.0679	0.231818	4.60662	4.09e-06	0.000175732
FGF12	42.0732	1.09373	0.437652	2.49909	0.0124513	0.047227
DDX60	1478.42	1.10807	0.295974	3.74381	0.000181249	0.00241864
MME	143.271	1.11329	0.411109	2.70802	0.00676864	0.0305372
SPRR2D	4567.67	1.13395	0.474744	2.38855	0.0169149	0.0589609
PCSK9	1156.25	1.16035	0.287794	4.03187	5.53e-05	0.00103736
DHCR7	1925.39	1.1653	0.217937	5.34695	8.94e-08	1.24e-05
TMEM154	750.07	1.19394	0.267432	4.46444	8.03e-06	0.000280892
SLC16A9	225.702	1.23548	0.41221	2.9972	0.00272474	0.0162307
DEGS2	216.158	1.26414	0.361769	3.49432	0.000475263	0.00479918
SYTL5	48.1751	1.2687	0.571685	2.21923	0.0264713	0.0816403
IGF2BP3	696.423	1.31008	0.354935	3.69103	0.000223351	0.0028126
GABRQ	90.4918	1.3728	0.53257	2.5777	0.00994616	0.0402118
CYP26B1	249.58	1.38179	0.359124	3.84768	0.000119243	0.00180688
B4GALT4	1854.48	1.38872	0.289845	4.79124	1.66e-06	9.35e-05
TPPP	388.332	1.40004	0.307372	4.55487	5.24e-06	0.000207578
GBX2	7.73798	1.40799	0.644329	2.1852	0.0288744	0.0869171
SLC6A11	61.7046	1.42037	0.570296	2.49059	0.0127532	0.0480586
CA2	1199.32	1.45301	0.370652	3.92015	8.85e-05	0.00145075
CYP2C18	372.321	1.48376	0.377885	3.92649	8.62e-05	0.00143278
KLK10	2849.55	1.50085	0.543972	2.75906	0.00579686	0.0274923
UPK1B	707.972	1.51825	0.687504	2.20835	0.0272202	0.0832359
ANO1	2110.86	1.55762	0.367513	4.23827	2.25e-05	0.000556858
ATP10B	465.531	1.58645	0.398722	3.97883	6.93e-05	0.00123161
SHISA9	12.766	1.58983	0.716936	2.21753	0.0265871	0.081868
RNASE10	9.19507	1.60323	0.752187	2.13143	0.0330541	0.0955157
SPRR2E	4420.57	1.61062	0.557042	2.89138	0.0038356	0.0204453
IGSF11	56.1696	1.61965	0.617704	2.62204	0.00874048	0.0367056
B4GALNT3	492.214	1.62028	0.347149	4.66738	3.05e-06	0.000143785
FBN2	606.39	1.62599	0.474148	3.42929	0.000605172	0.00568725
ASPRV1	121.115	1.6574	0.359832	4.60603	4.1e-06	0.00017582
UMODL1	18.5068	1.67087	0.60632	2.75575	0.00585569	0.0276997
HMGA2	197.819	1.69933	0.456381	3.72349	0.00019649	0.00255689
TDRD9	227.588	1.7279	0.706864	2.44445	0.0145071	0.0526959
LRRC4	484.239	1.74538	0.392131	4.45101	8.55e-06	0.000292899
LCE3E	72.1694	1.99165	0.622571	3.19907	0.00137873	0.00999551
NPR3	104.039	2.00106	0.429957	4.65411	3.25e-06	0.000150656
ELF5	64.5194	2.01594	0.616886	3.26793	0.00108336	0.0085214
LCE3D	257.812	2.0675	0.572192	3.6133	0.000302323	0.00353513
FIBCD1	22.0107	2.36104	0.575036	4.1059	4.03e-05	0.000840656
GSTA1	1158.59	2.37849	0.855318	2.78082	0.00542218	0.0262116
GLYATL2	66.052	2.46662	0.640977	3.84823	0.000118977	0.00180606
NMUR2	3.60613	3.02263	0.882793	3.42394	0.000617207	0.00576196
KLK14	110.689	3.23673	0.785252	4.1219	3.76e-05	0.000801275
SYCP1	1.5372	3.45487	1.52771	2.26147	0.02373	0.0752545
ALOX15	117.702	3.51827	0.622868	5.6485	1.62e-08	3.85e-06
SPRR2G	387.467	4.31382	0.61932	6.96542	3.27e-12	6.12e-09

## Sheet: TCGA_152sh2_direct
	baseMean	log2FoldChange	lfcSE	stat	pvalue	padj
DNAI2	2.69705	-3.81435	0.794114	-4.80327	1.56e-06	9.03e-05
KRT72	3.06569	-3.66515	0.813359	-4.50619	6.6e-06	0.000241664
DUSP13	15.4271	-2.4618	0.537766	-4.57782	4.7e-06	0.000191865
KRT84	22.7667	-2.19617	0.6853	-3.20469	0.00135208	0.00988058
TG	188.829	-1.96471	0.517688	-3.79517	0.000147543	0.00211344
ADCY10	2.9266	-1.93343	0.63377	-3.05068	0.0022832	0.0143071
UNC45B	25.8947	-1.91969	0.744812	-2.57741	0.00995435	0.0402118
PTPRR	17.9651	-1.79539	0.473156	-3.7945	0.00014794	0.00211387
MSMB	199.447	-1.66063	0.59774	-2.77819	0.00546631	0.0263541
PTPRN	5.99262	-1.53948	0.527989	-2.91575	0.0035483	0.0193338
FAM151A	27.9467	-1.48852	0.594568	-2.50353	0.0122963	0.0468131
ALDOB	4.39205	-1.45354	0.472231	-3.07803	0.00208377	0.0133962
RPS27	107.878	-1.39818	0.24455	-5.71736	1.08e-08	2.81e-06
CYP4F12	249.664	-1.32795	0.47	-2.82543	0.00472177	0.0237251
TNNI1	253.365	-1.3031	0.443797	-2.93624	0.00332218	0.0185594
ITGAM	468.786	-1.27847	0.344459	-3.71153	0.000206013	0.00264698
ATHL1	715.748	-1.23019	0.266002	-4.62473	3.75e-06	0.000166919
MYOM1	44.4532	-1.21154	0.341779	-3.5448	0.00039291	0.0042178
C17orf99	21.9332	-1.18964	0.375655	-3.16684	0.00154105	0.0108231
KLHDC7B	1226.98	-1.18723	0.465394	-2.55103	0.0107406	0.0424052
BCAS4	797.259	-1.18452	0.202961	-5.83617	5.34e-09	1.72e-06
ADCY5	100.541	-1.17604	0.497252	-2.36508	0.0180262	0.0615818
RPL39	553.693	-1.13336	0.261022	-4.34201	1.41e-05	0.000411544
ARNT2	937.56	-1.08734	0.427766	-2.5419	0.0110253	0.043231
LOXL4	429.884	-1.08466	0.444502	-2.44018	0.01468	0.0531531
SAA1	793.912	-1.08274	0.440673	-2.45702	0.0140096	0.0514042
GOLGA8B	286.595	-1.0536	0.280322	-3.75852	0.000170922	0.00234567
RTN4RL1	242.187	-1.05172	0.456258	-2.3051	0.0211607	0.0692701
DCST2	34.1499	-1.03987	0.311636	-3.3368	0.000847483	0.00722433
ENOX1	26.5912	-1.00301	0.344925	-2.90791	0.00363853	0.0196676
SERPINF1	3538.05	-0.995585	0.335979	-2.96324	0.00304423	0.0175136
LRRC16B	50.9069	-0.994778	0.316193	-3.14611	0.00165458	0.0113979
PLXNA4	37.7374	-0.989208	0.419669	-2.35711	0.0184176	0.0624652
ARL3	648.549	-0.980642	0.194424	-5.04383	4.56e-07	4e-05
CYB5A	756.309	-0.94431	0.316687	-2.98184	0.0028652	0.0167785
PRR5L	399.965	-0.936274	0.266042	-3.51927	0.000432728	0.00448613
PLA2G4C	233.698	-0.92638	0.315204	-2.93899	0.00329288	0.018469
NRXN2	52.427	-0.910806	0.381119	-2.38982	0.0168564	0.058809
CYTH4	414.385	-0.908098	0.247002	-3.67647	0.00023648	0.00294556
CGNL1	310.976	-0.90223	0.369123	-2.44426	0.0145151	0.0526999
SSR4	3403.09	-0.890744	0.180431	-4.93676	7.94e-07	5.67e-05
ISLR2	40.9752	-0.88255	0.386345	-2.28435	0.0223507	0.0719831
ALDH2	4157.64	-0.862901	0.262137	-3.2918	0.000995491	0.00804067
PYCARD	1139.28	-0.857103	0.216727	-3.95476	7.66e-05	0.0013239
CLYBL	70.3386	-0.85101	0.184116	-4.62214	3.8e-06	0.000167666
RPS19	21997.7	-0.848579	0.190111	-4.46359	8.06e-06	0.000280978
RPL34	6729.33	-0.842287	0.160808	-5.23783	1.62e-07	1.89e-05
JAZF1	292.722	-0.827427	0.221719	-3.73186	0.000190068	0.00250411
RPS24	15660.1	-0.817555	0.179584	-4.55249	5.3e-06	0.00020904
RPS21	8139.06	-0.813111	0.211248	-3.84908	0.000118564	0.00180405
RPL31	10539.3	-0.812748	0.166206	-4.89001	1.01e-06	6.75e-05
MICALL2	902.718	-0.812504	0.188915	-4.30089	1.7e-05	0.000468314
UBXN11	577.767	-0.788139	0.179078	-4.4011	1.08e-05	0.000347662
RPL37A	13273.5	-0.787919	0.184594	-4.26839	1.97e-05	0.000509133
RPL32	11786.2	-0.786066	0.183737	-4.27822	1.88e-05	0.000496286
EPHX2	687.078	-0.782595	0.273508	-2.86133	0.0042187	0.0219744
PNKD	1072.93	-0.77455	0.178864	-4.33038	1.49e-05	0.000424896
ARHGAP22	144.602	-0.773702	0.19895	-3.88893	0.000100687	0.00159835
MDGA1	281.437	-0.772172	0.31201	-2.47483	0.01333	0.0495552
PYROXD2	54.0949	-0.770137	0.303045	-2.54133	0.0110432	0.0432484
RPS9	15209	-0.769368	0.161992	-4.74941	2.04e-06	0.000110603
TCEA2	262.6	-0.767073	0.232947	-3.29291	0.000991571	0.00802269
ST8SIA1	122.769	-0.766437	0.342459	-2.23804	0.0252183	0.0786355
NINJ1	1835.92	-0.761343	0.234758	-3.24309	0.0011824	0.009018
PIM2	1145.85	-0.760776	0.257974	-2.94904	0.0031876	0.0180775
CYGB	326.407	-0.751107	0.29489	-2.54707	0.010863	0.042787
RHOH	204.381	-0.750708	0.290482	-2.58436	0.00975611	0.0396011
RPL27A	7622.84	-0.743434	0.169551	-4.38472	1.16e-05	0.000367128
ZNF488	224.784	-0.741991	0.312407	-2.37508	0.0175452	0.0604911
MAPK11	377.893	-0.739797	0.1784	-4.14684	3.37e-05	0.00074019
KCNC4	251.5	-0.737532	0.234227	-3.14879	0.00163948	0.0113305
RABAC1	1341.85	-0.727158	0.151514	-4.79929	1.59e-06	9.15e-05
RPS20	15443.4	-0.723725	0.179219	-4.03821	5.39e-05	0.00101701
S1PR4	129.764	-0.716504	0.29134	-2.45934	0.0139193	0.051171
CARD16	162.292	-0.716436	0.220147	-3.25435	0.0011365	0.0087701
CCDC88B	601.867	-0.712025	0.249891	-2.84934	0.004381	0.0225444
PCBD1	699.273	-0.711289	0.142512	-4.99107	6e-07	4.83e-05
GPX4	3589.5	-0.709744	0.191576	-3.70477	0.00021158	0.0026921
CBR3	711.078	-0.70729	0.242531	-2.91628	0.00354227	0.0193104
GAS6	1985.58	-0.704615	0.233514	-3.01744	0.00254919	0.0154757
AGBL2	12.7566	-0.700245	0.290296	-2.41217	0.0158577	0.0561079
CAMK1G	7.99221	-0.689769	0.29913	-2.30592	0.0211153	0.0691584
ATF7IP2	142.821	-0.68971	0.262747	-2.625	0.00866487	0.0364716
ASCL2	205.789	-0.688839	0.290026	-2.3751	0.0175444	0.0604911
RPLP1	24791.8	-0.683267	0.173223	-3.94443	8e-05	0.00136431
APH1B	146.819	-0.680171	0.168388	-4.03931	5.36e-05	0.00101436
CCDC146	258.822	-0.674296	0.252982	-2.66539	0.00768997	0.0334827
NPHP1	50.4926	-0.671242	0.257618	-2.60557	0.00917217	0.0379449
COX6C	2420.2	-0.668919	0.182887	-3.65756	0.000254623	0.00312066
PHLDA3	2134.2	-0.665442	0.18281	-3.64007	0.000272561	0.00327027
RPS4X	22734.2	-0.653722	0.199813	-3.27167	0.00106915	0.00845314
CAPN12	154.215	-0.651645	0.211037	-3.08783	0.00201624	0.0130848
ECHDC2	593.565	-0.645011	0.183974	-3.506	0.000454899	0.00465175
TNFRSF25	316.464	-0.64249	0.21906	-2.93294	0.00335769	0.0186735
RPL30	13672.2	-0.641989	0.167481	-3.83321	0.000126483	0.0018962
EID3	34.2038	-0.636567	0.273719	-2.32562	0.020039	0.0664883
GLI4	187.38	-0.633582	0.197063	-3.21512	0.0013039	0.00966326
RAB20	249.095	-0.633214	0.189864	-3.3351	0.000852689	0.00725815
SPARCL1	1574.51	-0.631392	0.263687	-2.39448	0.0166439	0.0582602
SNRPD2	3570.68	-0.631136	0.151666	-4.16137	3.16e-05	0.000709944
RPL38	5416.39	-0.620563	0.18994	-3.26716	0.00108633	0.00853016
BLVRA	1050.37	-0.618788	0.151086	-4.0956	4.21e-05	0.000863999
FGL2	602.396	-0.615406	0.289862	-2.1231	0.0337451	0.0969051
FAM13A	415.024	-0.604175	0.264004	-2.28851	0.0221079	0.0713893
RPL28	17602.5	-0.600116	0.170845	-3.51263	0.000443692	0.00456259
RPL11	15813.6	-0.599133	0.154619	-3.87489	0.000106673	0.00166554
FTH1	18578.2	-0.59814	0.152821	-3.91398	9.08e-05	0.00147572
COTL1	3116.76	-0.596713	0.203475	-2.93262	0.00336115	0.0186804
SLA	521.854	-0.595968	0.258394	-2.30643	0.0210864	0.0690962
CDK18	878.396	-0.595448	0.21882	-2.72117	0.00650509	0.0297434
IL10RA	648.617	-0.585924	0.260136	-2.25238	0.0242985	0.076575
IGFBP4	6661.27	-0.57692	0.20546	-2.80795	0.00498581	0.0246268
ANKDD1A	91.9452	-0.574165	0.167877	-3.42015	0.000625872	0.00582441
GPR132	150.83	-0.573091	0.249097	-2.30068	0.0214099	0.0697991
TLR2	609.007	-0.571277	0.220682	-2.58869	0.00963406	0.039236
SEC61G	1072.34	-0.563522	0.161401	-3.49143	0.000480435	0.00483733
TMEM8B	204.417	-0.563122	0.215774	-2.60978	0.00906011	0.0376512
CEBPB	1498.84	-0.561611	0.19081	-2.9433	0.00324729	0.0183028
RPS14	13615.8	-0.559819	0.167357	-3.34505	0.000822665	0.00707484
S1PR5	714.847	-0.558522	0.214888	-2.59913	0.00934609	0.0383958
HDAC11	545.254	-0.556099	0.170296	-3.26547	0.00109281	0.00856952
HSPB11	537.048	-0.544279	0.13011	-4.18321	2.87e-05	0.000667062
PNRC1	2341.46	-0.544199	0.173392	-3.13855	0.00169783	0.0116113
RPL14	5517.42	-0.543589	0.180706	-3.00814	0.00262848	0.0158166
PIK3IP1	1077.5	-0.535561	0.185652	-2.88475	0.00391722	0.020806
FBXO32	777.991	-0.533072	0.22624	-2.35622	0.0184619	0.0625808
RPL29	8017.34	-0.52418	0.193319	-2.71148	0.00669834	0.0303845
HINT1	4495.29	-0.522974	0.139082	-3.76017	0.000169796	0.00233725
RPL5	14685.4	-0.519438	0.144044	-3.6061	0.000310831	0.00360373
MSRB2	251.222	-0.517057	0.195437	-2.64564	0.00815364	0.0350028
ANAPC16	1842.35	-0.511024	0.0996474	-5.12832	2.92e-07	2.88e-05
AKR1B1	1323.12	-0.510197	0.193964	-2.63037	0.00852923	0.036033
SMAP2	1301.17	-0.495855	0.143601	-3.45301	0.00055436	0.00534676
IRF1	3222.21	-0.49534	0.218588	-2.26609	0.0234461	0.0746367
DUSP5	1228.5	-0.494769	0.230503	-2.14647	0.0318351	0.0930343
COX7C	3099.84	-0.491303	0.149876	-3.27806	0.00104522	0.00830531
SMYD3	188.898	-0.488939	0.18216	-2.68411	0.00727221	0.0321447
RPL10A	8713.85	-0.484744	0.136298	-3.55649	0.000375836	0.004114
WDR13	1461.09	-0.484086	0.140059	-3.45631	0.000547629	0.00531488
C9orf72	337.56	-0.481852	0.16037	-3.00463	0.00265903	0.0159325
ZP3	287.046	-0.478281	0.202825	-2.35809	0.0183691	0.0623468
FTL	31203.7	-0.477516	0.187586	-2.54559	0.0109095	0.0429229
PPP1R16A	664.916	-0.477324	0.137994	-3.45902	0.000542145	0.00527613
SLC27A1	449.282	-0.471553	0.173282	-2.72131	0.00650247	0.0297388
SQSTM1	10869.3	-0.469925	0.158049	-2.97329	0.00294622	0.0170676
SRGAP3	340.118	-0.464319	0.213732	-2.17244	0.0298227	0.0888381
IMMP2L	64.2378	-0.455113	0.165272	-2.75372	0.00589225	0.0278368
CAPG	5150.69	-0.451323	0.151203	-2.98488	0.00283691	0.016663
RPS23	11303.5	-0.446696	0.164514	-2.71525	0.00662259	0.0301303
EEF1G	12808.2	-0.441733	0.155202	-2.84619	0.00442463	0.0226925
SYNGR2	6523	-0.437736	0.161356	-2.71286	0.00667048	0.0302956
CCDC28A	420.754	-0.43166	0.119428	-3.61439	0.000301054	0.00352299
KSR1	1010.78	-0.426625	0.166538	-2.56173	0.0104153	0.0414444
PLEKHO2	932.904	-0.421962	0.165767	-2.54552	0.0109116	0.0429229
FBL	4782.21	-0.419534	0.173699	-2.41529	0.0157226	0.0557804
MMP24	177.417	-0.417981	0.192238	-2.17429	0.0296831	0.0885518
CBX7	1055.16	-0.415116	0.197107	-2.10605	0.0352001	0.0999462
ACADS	500.971	-0.41474	0.154548	-2.68356	0.00728424	0.0321589
POLB	452.588	-0.404303	0.152905	-2.64414	0.00818985	0.0351336
RPL35A	14085.6	-0.402107	0.16342	-2.46057	0.0138716	0.0510818
DEF6	1009.93	-0.402054	0.138879	-2.895	0.0037916	0.0202808
RPL3	27984.4	-0.401376	0.136736	-2.9354	0.00333114	0.0185812
NAP1L1	6476.23	-0.400159	0.125374	-3.19172	0.00141426	0.0101956
CSRP1	3838.17	-0.399951	0.117529	-3.40301	0.000666489	0.0060857
ZNF846	70.4527	-0.399887	0.157092	-2.54555	0.0109105	0.0429229
TARSL2	240.322	-0.398314	0.14526	-2.74207	0.00610528	0.0284908
RNF122	223.471	-0.398237	0.182651	-2.18032	0.0292341	0.0875827
EFHC1	176.691	-0.393	0.178351	-2.20352	0.0275581	0.084017
HAUS4	1087.2	-0.392741	0.145732	-2.69495	0.0070399	0.0313597
AES	8116.5	-0.386181	0.123828	-3.1187	0.00181651	0.012182
PRDX5	4804.28	-0.385615	0.166669	-2.31366	0.0206862	0.0680446
TFEB	569.667	-0.379068	0.150813	-2.5135	0.011954	0.0458722
TSNARE1	298.447	-0.37837	0.161468	-2.34332	0.0191131	0.0642901
CISH	334.454	-0.377668	0.175495	-2.15201	0.0313963	0.0920537
TMEM53	188.033	-0.37366	0.122091	-3.06051	0.00220964	0.0139944
XPC	940.986	-0.369315	0.114716	-3.21938	0.0012847	0.00956406
CRYL1	258.372	-0.368307	0.172048	-2.14072	0.0322963	0.0939476
MZF1	303.247	-0.367065	0.148052	-2.4793	0.0131641	0.0490246
MFSD10	1422.6	-0.365958	0.14709	-2.48799	0.0128468	0.0483305
BCAT2	1135.07	-0.362048	0.148165	-2.44355	0.0145435	0.0527847
COX6A1	2364.86	-0.360928	0.162429	-2.22206	0.0262793	0.0812669
MGST2	939.512	-0.354609	0.148879	-2.38186	0.0172253	0.0596972
RBPJ	641.618	-0.351027	0.142257	-2.46756	0.0136037	0.0503074
EFCAB7	128.618	-0.347332	0.128554	-2.70185	0.00689559	0.0308895
ATP5O	3516.96	-0.347234	0.146253	-2.37419	0.0175873	0.060573
RPLP0	22069.2	-0.347164	0.156594	-2.21697	0.0266249	0.0819622
GRHPR	1578.19	-0.340672	0.102306	-3.32995	0.000868621	0.00734941
UNC119	564.502	-0.339892	0.118681	-2.86391	0.00418452	0.0218585
ARHGEF1	2277.04	-0.336082	0.127206	-2.64202	0.00824137	0.0352631
CAMLG	634.912	-0.335089	0.118089	-2.8376	0.00454542	0.0230988
PMM1	642.433	-0.330549	0.132065	-2.50293	0.012317	0.0468628
CYC1	3563.94	-0.328399	0.149808	-2.19213	0.0283702	0.0858503
PSMB4	5371.48	-0.322357	0.0967579	-3.33158	0.000863542	0.00732203
POLD4	1307.84	-0.320476	0.147316	-2.17543	0.0295976	0.0883686
AGAP3	1293.37	-0.307183	0.141511	-2.17073	0.0299514	0.0891348
UBAC1	1987.69	-0.307171	0.132019	-2.32673	0.0199799	0.0663763
AK2	3297	-0.303505	0.101498	-2.99024	0.00278755	0.0164929
POLR1D	2140.24	-0.294444	0.123971	-2.3751	0.0175442	0.0604911
DYNC2LI1	199.291	-0.293749	0.126101	-2.32946	0.0198345	0.0660075
PEF1	2392.23	-0.280838	0.0925799	-3.03346	0.00241765	0.0148739
CHST12	365.872	-0.276886	0.123142	-2.24852	0.0245431	0.0770808
HMGCL	781.939	-0.270144	0.122129	-2.21196	0.0269694	0.0826474
NME7	182.167	-0.269007	0.121798	-2.20862	0.0272008	0.0832044
BBS4	236.7	-0.264229	0.114057	-2.31664	0.0205231	0.0676174
KIAA0141	745.469	-0.25733	0.117053	-2.19841	0.02792	0.0848522
OAZ2	1302.44	-0.255769	0.0907413	-2.81866	0.00482243	0.0240455
BRE	506.315	-0.245328	0.107879	-2.27409	0.0229605	0.0734937
ERI3	1120.3	-0.243534	0.100634	-2.41999	0.015521	0.0553221
TIA1	1245.37	-0.228821	0.10821	-2.11459	0.0344645	0.0983514
IKBKB	1096.78	-0.225428	0.0984928	-2.28877	0.0220925	0.0713523
CRIPT	375.759	-0.217738	0.101594	-2.14321	0.0320959	0.0935876
TSN	1989.03	0.167858	0.0694014	2.41865	0.0155781	0.0554287
POLR3B	362.492	0.19488	0.0819431	2.37823	0.0173958	0.0601003
UPF1	3261.1	0.199468	0.0781318	2.55296	0.010681	0.0422244
RNF4	1453.9	0.202867	0.0822223	2.46729	0.0136138	0.0503143
LASP1	5632.51	0.208224	0.0928362	2.24292	0.0249022	0.0779312
ZMPSTE24	1362.87	0.20871	0.0870557	2.39743	0.0165104	0.0579031
XPO1	4584.52	0.209461	0.0769166	2.72322	0.00646492	0.0296336
USP7	2891.21	0.214194	0.0894927	2.39342	0.0166921	0.058373
MTMR2	606.656	0.228958	0.107208	2.13565	0.0327078	0.0947009
INTS7	846.375	0.237216	0.108159	2.19321	0.0282921	0.0856565
ZNF207	3543.38	0.238989	0.0604647	3.95255	7.73e-05	0.00133246
NIPA2	1094.67	0.243564	0.101237	2.40589	0.0161331	0.0568986
CRCP	874.762	0.245431	0.0776047	3.16258	0.00156377	0.0109434
PAXIP1	449.137	0.245514	0.11214	2.18936	0.0285709	0.0863154
ABL1	2072.16	0.246825	0.116158	2.12491	0.0335937	0.096694
SP2	646.464	0.253457	0.0865026	2.93004	0.00338913	0.018762
PHRF1	1648.4	0.255068	0.109402	2.33147	0.0197287	0.0657682
ZC3H4	1262.54	0.257356	0.093806	2.74349	0.00607892	0.028375
KPNB1	5606.62	0.258116	0.0886447	2.9118	0.00359353	0.0194818
AHCTF1	1210.25	0.258405	0.0982596	2.62982	0.0085431	0.0360833
XPOT	1938.22	0.261564	0.0938551	2.7869	0.00532157	0.0258603
ZCCHC2	476.01	0.262257	0.122122	2.1475	0.0317537	0.0928852
UTP15	366.064	0.262267	0.0963187	2.72291	0.00647095	0.029639
CDV3	4526.42	0.262445	0.103828	2.52769	0.0114817	0.044488
CHD1	868.149	0.264243	0.122369	2.1594	0.0308188	0.0909191
KCTD5	1241.49	0.265388	0.101969	2.60263	0.00925112	0.038151
OTUD6B	319.355	0.265529	0.112292	2.36463	0.018048	0.0616104
C6orf106	4230.78	0.266429	0.114546	2.32595	0.0200211	0.0664531
PRKCH	1039.25	0.267098	0.108069	2.47155	0.0134528	0.0498499
RAB6A	2849.75	0.270928	0.114066	2.37518	0.0175403	0.0604911
SEC61A1	10037.4	0.271369	0.107579	2.52252	0.0116517	0.0450041
USP14	1610.49	0.276021	0.11296	2.44353	0.0145442	0.0527847
C12orf49	554.798	0.27698	0.10213	2.71205	0.00668694	0.0303403
TMEM87A	1626.33	0.280558	0.103192	2.7188	0.00655199	0.0298759
CNOT6	1396.3	0.281009	0.109578	2.56446	0.0103336	0.0412603
UBN1	1881.82	0.281219	0.0919673	3.05782	0.00222954	0.0140815
C5orf22	647.218	0.283163	0.107296	2.63909	0.00831285	0.0354127
CEP350	1406.32	0.28666	0.122203	2.34576	0.0189884	0.0639833
UBTD2	697.286	0.293884	0.109774	2.67717	0.00742464	0.0325906
ZC3H18	1084.91	0.294044	0.0918969	3.19972	0.00137563	0.00997715
TBC1D14	1906.86	0.294726	0.113058	2.60686	0.00913766	0.0378534
NOL11	1158.36	0.295019	0.0936761	3.14935	0.00163633	0.0113173
BAZ1B	2564.13	0.295384	0.0875795	3.37275	0.000744213	0.0066022
TMEM181	878.101	0.299058	0.129951	2.30131	0.0213739	0.0697434
GOLPH3	2495.64	0.299263	0.112161	2.66816	0.00762682	0.0332603
ZFR	1878.01	0.301855	0.111565	2.70564	0.00681731	0.0306963
TARS	2692.63	0.304437	0.128091	2.37673	0.0174667	0.0603114
MSL2	1404.16	0.305361	0.114749	2.66112	0.00778822	0.0337741
GTPBP10	288.353	0.305428	0.0775506	3.93844	8.2e-05	0.00139493
NUP98	2540.12	0.306703	0.117934	2.60063	0.00930518	0.038305
CHORDC1	410.193	0.311522	0.142833	2.18102	0.0291816	0.0874584
NSUN2	1979.27	0.312859	0.126861	2.46616	0.0136572	0.0504442
TDRD7	654.642	0.313624	0.147547	2.12559	0.0335372	0.0965617
UGGT1	2222.26	0.315526	0.11105	2.84129	0.00449317	0.0229286
WDR43	1084.32	0.317246	0.112619	2.81698	0.00484773	0.0241203
BDP1	820.571	0.317593	0.140429	2.2616	0.0237223	0.0752509
ACTN4	14212.6	0.318007	0.107463	2.95923	0.00308412	0.0176714
RABGAP1	1772.07	0.318179	0.13072	2.43404	0.0149311	0.0537738
ASAP1	1171.56	0.319976	0.13707	2.3344	0.0195749	0.0653652
LRRC59	3553.52	0.321708	0.123787	2.59889	0.0093527	0.0384144
TTF2	763.544	0.322441	0.146314	2.20377	0.0275409	0.083995
CAPRIN1	5972.6	0.324101	0.118983	2.72393	0.006451	0.0295774
TRUB1	462.085	0.326518	0.133473	2.44633	0.014432	0.0525021
MGA	1471.25	0.32659	0.147383	2.21594	0.0266959	0.0820856
NAA15	1383.93	0.326711	0.125578	2.60165	0.00927759	0.0382258
ZFYVE21	756.148	0.327553	0.137932	2.37474	0.0175613	0.060535
PPP3CA	1197.42	0.327816	0.13137	2.49537	0.0125825	0.0475823
PBRM1	1307.67	0.328371	0.150901	2.17607	0.0295501	0.0882816
NCBP1	1230.12	0.331498	0.0964487	3.43704	0.0005881	0.00557252
TANC1	1283.33	0.331522	0.153215	2.16377	0.0304819	0.0902323
TRIM25	1767.53	0.331555	0.117716	2.81656	0.0048541	0.0241388
RAB3GAP1	1654.73	0.332188	0.0990619	3.35333	0.000798449	0.00693489
CDK13	1143.13	0.332544	0.104686	3.1766	0.00149013	0.0105774
SETD1B	1053.49	0.332638	0.119692	2.77911	0.00545073	0.0263067
GATAD2A	2069.45	0.333783	0.0993842	3.35852	0.000783618	0.00685806
ZFP91	2740.13	0.334907	0.110822	3.02203	0.0025109	0.015305
NUP50	1973.35	0.335319	0.0938487	3.57297	0.000352952	0.00393017
TRAM2	1041.11	0.33648	0.159054	2.1155	0.034387	0.0982372
WWP2	1197.35	0.336511	0.107325	3.13544	0.00171596	0.0117013
YY1	1384.97	0.336558	0.110603	3.04293	0.00234285	0.0145812
TBCCD1	537.013	0.339236	0.130224	2.60503	0.00918673	0.0379966
PHF2	1304.38	0.339592	0.123395	2.75207	0.00592199	0.0279265
LRIG2	214.734	0.339613	0.13258	2.56158	0.0104197	0.0414505
NPC1	1581.68	0.341595	0.131849	2.59081	0.0095749	0.0390732
ZFX	517.94	0.347975	0.154856	2.24709	0.024634	0.0773445
CPNE2	837.541	0.348906	0.145229	2.40245	0.0162857	0.0573457
DMXL1	837.08	0.349104	0.152976	2.28209	0.0224842	0.0723115
SNX12	253.096	0.350801	0.136884	2.56276	0.0103844	0.0413818
PALB2	575.36	0.351132	0.112942	3.10897	0.00187741	0.0124477
BCOR	979.023	0.351388	0.146885	2.39227	0.0167446	0.0585231
SMG7	2671.95	0.352955	0.0914287	3.86043	0.000113186	0.00174099
GNAQ	1195.85	0.354227	0.124228	2.85143	0.00435229	0.0224344
DDX6	2533.85	0.355394	0.103659	3.42848	0.00060698	0.00569549
SLC38A1	3841.45	0.357519	0.151155	2.36525	0.0180181	0.0615656
CREBBP	2616.54	0.357758	0.132801	2.69394	0.00706132	0.031417
PAPD5	299.19	0.361256	0.122217	2.95586	0.00311797	0.0177872
MTDH	3197.37	0.361533	0.0991573	3.64606	0.000266295	0.00322278
MARK2	2118.13	0.365171	0.105431	3.46361	0.000532977	0.00522574
PDPK1	1292.4	0.365236	0.138168	2.64343	0.00820717	0.0351914
TUBA1C	12612.6	0.365471	0.136109	2.68514	0.00724995	0.0320813
DAG1	3552.94	0.36632	0.130425	2.80866	0.00497481	0.0245791
CASKIN2	691.822	0.367801	0.114751	3.20519	0.00134971	0.0098751
RMI1	638.97	0.369183	0.144732	2.5508	0.0107476	0.0424236
GTF3C1	2890.18	0.369209	0.109218	3.38048	0.000723586	0.0064577
HEATR1	1116.97	0.370908	0.127802	2.90221	0.00370543	0.0199302
NUP153	2005.65	0.372511	0.156923	2.37384	0.0176041	0.0605916
FAM111B	1148.67	0.375195	0.161329	2.32564	0.0200375	0.0664883
HIPK1	1976.73	0.37687	0.143642	2.62367	0.0086987	0.0365804
YIPF6	255.414	0.377216	0.128239	2.94151	0.00326612	0.0183694
STIL	745.483	0.379361	0.14323	2.64861	0.0080824	0.0347703
TMEM14A	783.033	0.379368	0.168294	2.2542	0.0241839	0.0763125
PKN2	1366.1	0.380512	0.114321	3.32846	0.000873275	0.00737152
SLC30A1	269.076	0.381733	0.180133	2.11918	0.0340756	0.0975603
SLC31A1	1378.37	0.381962	0.125231	3.05005	0.00228802	0.01433
PAQR3	296.151	0.382154	0.145184	2.63221	0.00848304	0.0359539
SYNE2	4744.16	0.384778	0.16847	2.28395	0.0223745	0.0720226
EIF4G2	21383.5	0.38698	0.117019	3.30698	0.000943066	0.00777129
ARHGAP12	449.173	0.387567	0.1271	3.0493	0.00229374	0.0143584
VANGL1	1148.82	0.390226	0.128129	3.04557	0.00232243	0.0144935
URB2	433.701	0.395725	0.11451	3.45581	0.000548641	0.00531488
BRD4	2429	0.399176	0.114921	3.47348	0.000513753	0.00509171
NIPA1	672.142	0.401536	0.13084	3.06891	0.00214842	0.0137298
KLF6	3563.49	0.404613	0.178555	2.26604	0.0234491	0.0746367
ABL2	755.915	0.405635	0.144582	2.80557	0.00502281	0.0247651
RASA1	775.607	0.406078	0.128292	3.16526	0.00154946	0.0108718
STK35	1354.59	0.407278	0.0987554	4.12411	3.72e-05	0.000796243
IARS	3218.44	0.40935	0.117373	3.48759	0.000487397	0.00488843
CLIC4	3644.67	0.40967	0.149202	2.74574	0.00603755	0.0282394
BCAR1	1755.53	0.41205	0.184234	2.23656	0.0253149	0.0788431
ZNF217	1356.91	0.416533	0.159849	2.60578	0.00916642	0.0379297
AQR	1087.45	0.418663	0.125949	3.32407	0.000887143	0.00742052
ANAPC1	707.471	0.420267	0.122986	3.4172	0.000632681	0.00585573
POP1	298.389	0.420796	0.138501	3.03821	0.00237985	0.0147303
MBNL1	4353.61	0.425958	0.100882	4.22234	2.42e-05	0.000587147
USP6NL	745.691	0.426269	0.155023	2.74971	0.00596475	0.0280688
GPSM2	1547.36	0.428476	0.133543	3.20853	0.00133417	0.00982017
SLC25A13	618.934	0.430922	0.113674	3.79086	0.000150126	0.00212793
ZBTB34	344.589	0.431374	0.120972	3.56589	0.000362628	0.00401739
SPIN1	2070.4	0.433188	0.122544	3.53496	0.000407842	0.00432742
CTTNBP2NL	1141.3	0.434389	0.135864	3.19722	0.00138758	0.0100241
KIAA1524	619.988	0.435779	0.172959	2.51955	0.0117504	0.0452518
ZNF710	366.969	0.436206	0.171919	2.53727	0.0111721	0.0436017
REV3L	586.46	0.436613	0.180008	2.42552	0.0152865	0.0547918
WDR44	479.337	0.437	0.151738	2.87996	0.00397726	0.0210374
SREBF2	6644.5	0.439284	0.116293	3.7774	0.000158471	0.00221799
JMY	794.97	0.443429	0.12593	3.52124	0.000429535	0.00446579
PAWR	349.459	0.448142	0.133598	3.35441	0.000795351	0.00691454
TRAK1	1490.81	0.450637	0.132989	3.38854	0.000702657	0.00632771
ACSL3	1840.38	0.45199	0.131458	3.43829	0.000585405	0.00556135
HEATR3	262.919	0.452801	0.123251	3.67381	0.000238965	0.00296844
STRN3	702.631	0.453446	0.169904	2.66884	0.00761134	0.033235
SPRED2	710.715	0.453554	0.1559	2.90926	0.00362284	0.0195943
MAPK1	3230.92	0.453624	0.0982814	4.61557	3.92e-06	0.000171655
FAM83D	1373.97	0.453985	0.170377	2.66459	0.00770811	0.0335378
TOP1	2153.77	0.454176	0.106412	4.26809	1.97e-05	0.000509133
SHCBP1	436.551	0.456692	0.154637	2.95332	0.00314375	0.0178897
OGFOD1	805.744	0.458689	0.115856	3.95912	7.52e-05	0.00130275
ECT2	2553.52	0.459668	0.182689	2.51612	0.0118655	0.0455991
CYP51A1	1376.36	0.460622	0.170065	2.7085	0.00675887	0.0305156
TJP2	2994.64	0.461005	0.156609	2.94367	0.00324347	0.0182869
USP10	1613.79	0.461371	0.107501	4.29178	1.77e-05	0.000478618
TYRO3	475.867	0.465835	0.170179	2.73732	0.00619416	0.02873
ARID1A	3269.33	0.469494	0.115874	4.05175	5.08e-05	0.000972961
DOCK9	1778.64	0.472406	0.190993	2.47342	0.0133828	0.0496907
CPEB2	434.288	0.474104	0.214093	2.21447	0.0267964	0.0822556
RFWD3	1531.85	0.474482	0.127936	3.70875	0.000208289	0.00266874
ITPR3	5366.3	0.475392	0.190468	2.49591	0.0125634	0.047544
ERI2	412.37	0.479193	0.112989	4.24104	2.22e-05	0.000555752
STAG1	1247.84	0.481298	0.176781	2.72257	0.0064777	0.0296551
FOXO3	1421.72	0.481859	0.144604	3.33226	0.000861442	0.00730891
ANTXR1	2137.57	0.482195	0.207578	2.32296	0.0201815	0.0668173
TULP4	844.126	0.482514	0.136747	3.52851	0.000417909	0.00439608
FAM126A	653.84	0.483079	0.183041	2.63919	0.00831047	0.0354107
AHR	1929.43	0.484472	0.193722	2.50086	0.0123893	0.0470305
ATF7IP	1097.49	0.487267	0.169161	2.88049	0.0039706	0.0210104
KPNA1	2338.76	0.487433	0.117929	4.13328	3.58e-05	0.000768949
MXRA7	1418.84	0.491621	0.185034	2.65693	0.00788562	0.0340771
MAN1A2	730.14	0.493737	0.196827	2.50849	0.012125	0.0463632
FAM120A	4840.91	0.494241	0.113642	4.34911	1.37e-05	0.000401004
TIAM1	1161.51	0.497343	0.160717	3.09452	0.00197132	0.012849
FURIN	2952.62	0.499323	0.15957	3.12918	0.00175296	0.011888
USP12	224.924	0.499641	0.222684	2.24372	0.0248502	0.077801
AP1G1	2122.17	0.501881	0.124281	4.03826	5.38e-05	0.00101701
TGFBRAP1	300.214	0.504101	0.205389	2.45437	0.0141131	0.0517629
SLC20A2	1908.13	0.506075	0.168742	2.9991	0.00270782	0.0161719
CLSPN	419.168	0.506266	0.19314	2.62124	0.00876098	0.0367496
BMP8B	128.368	0.508333	0.217337	2.33892	0.0193397	0.0647896
PLSCR1	2386.13	0.508394	0.188036	2.70371	0.00685707	0.0308072
QTRTD1	810.807	0.509689	0.118621	4.29679	1.73e-05	0.000472811
AASS	298.353	0.511029	0.233432	2.1892	0.0285824	0.0863154
MSI2	254.084	0.513302	0.172445	2.97662	0.00291446	0.0169586
GALNT3	924.959	0.515115	0.209456	2.4593	0.013921	0.051171
GPD2	2035.9	0.517179	0.16699	3.09706	0.00195448	0.0127983
TMEM2	960.459	0.518311	0.196149	2.64243	0.00823137	0.0352457
PLEKHA7	567.96	0.523948	0.206534	2.53686	0.0111852	0.0436377
SQLE	2128.9	0.524281	0.208613	2.51318	0.0119649	0.0458945
SMC2	1957.9	0.52549	0.150549	3.4905	0.000482126	0.00484903
SOCS6	488.08	0.530792	0.134828	3.93683	8.26e-05	0.00140042
ADAM9	2666.57	0.531022	0.185305	2.86567	0.00416133	0.0217932
PHLPP1	823.072	0.534954	0.116159	4.60536	4.12e-06	0.000175978
KLF5	7922.44	0.535242	0.189715	2.82129	0.0047831	0.02392
PAK2	3744.18	0.5381	0.121249	4.43798	9.08e-06	0.000306055
PHACTR2	624.173	0.538207	0.186081	2.89233	0.00382401	0.0204203
NRP1	994.391	0.539874	0.220189	2.45187	0.0142118	0.0520313
SLC27A4	1384.03	0.542146	0.176164	3.07752	0.00208733	0.0134097
ATP1B1	6941.43	0.542423	0.229698	2.36146	0.0182033	0.0620161
IDE	513.823	0.543012	0.195519	2.77728	0.00548161	0.0263876
EP300	2501.99	0.54425	0.167506	3.24914	0.00115756	0.00887653
F2R	711.17	0.544946	0.223934	2.43352	0.014953	0.0538313
RSC1A1	256.195	0.54701	0.196327	2.78621	0.00533275	0.0259009
ATP2B1	1232.75	0.554927	0.168769	3.28809	0.00100868	0.00810083
TMCC1	863.159	0.55825	0.131479	4.24592	2.18e-05	0.000546779
CDK12	1391.84	0.559363	0.118783	4.70913	2.49e-06	0.000125867
STRN	424.141	0.560661	0.249099	2.25075	0.0244011	0.0767808
POLQ	606.469	0.56132	0.192871	2.91034	0.00361036	0.0195499
PPL	9482.84	0.562488	0.243413	2.31084	0.0208419	0.0684464
DENND1B	111.047	0.565057	0.214728	2.6315	0.00850097	0.03598
ACVR1	671.812	0.568498	0.149868	3.79333	0.000148641	0.00211758
APP	13890.5	0.570678	0.143761	3.96963	7.2e-05	0.00126662
TJP1	2624.25	0.577785	0.166483	3.47055	0.0005194	0.00513657
BRIP1	352.947	0.578187	0.218423	2.6471	0.00811858	0.034885
POLR1A	834.157	0.578792	0.154458	3.74725	0.000178786	0.00239799
RASAL2	751.662	0.581368	0.196443	2.95947	0.00308173	0.0176684
KLF9	828.84	0.583303	0.229469	2.54197	0.011023	0.043231
INCENP	1005.72	0.589837	0.142207	4.14775	3.36e-05	0.000738145
NETO2	747.423	0.592355	0.174151	3.40139	0.000670441	0.00610961
AMD1	2400.82	0.593377	0.139814	4.24406	2.2e-05	0.000550586
NRP2	1220.16	0.593921	0.229769	2.58486	0.00974176	0.0395604
EXPH5	358.53	0.594149	0.198378	2.99504	0.00274408	0.0163194
CASC5	484.607	0.596171	0.236337	2.52255	0.0116508	0.0450041
OCLN	238.676	0.596182	0.255538	2.33304	0.0196458	0.0655634
ANKIB1	1106.58	0.600806	0.124905	4.8101	1.51e-06	8.89e-05
SENP2	1183.8	0.602089	0.144982	4.15286	3.28e-05	0.00072621
KIF21A	811.139	0.602783	0.182418	3.3044	0.000951783	0.00782315
MBOAT2	817.842	0.611306	0.258916	2.36102	0.0182246	0.0620632
SH3PXD2B	1637.39	0.612209	0.202674	3.02066	0.00252226	0.0153589
PRPF4	1441.69	0.612898	0.147985	4.14162	3.45e-05	0.000752966
FAM129A	2418.49	0.614684	0.202341	3.03787	0.00238259	0.0147385
SNTB2	903.21	0.617507	0.130281	4.7398	2.14e-06	0.00011335
ZFHX3	527.694	0.620213	0.190459	3.25641	0.00112829	0.00873248
ESRP2	1598.19	0.622818	0.163312	3.81367	0.000136918	0.0019934
CA13	119.409	0.628068	0.248698	2.52543	0.0115558	0.0446899
GALNT7	773.433	0.630871	0.24788	2.54507	0.0109256	0.0429598
MAL2	8907.23	0.633646	0.173397	3.6543	0.000257884	0.00315038
N4BP1	1949.99	0.637374	0.138844	4.59057	4.42e-06	0.000183362
FASN	5083.66	0.640318	0.173133	3.69842	0.000216945	0.00274702
TLE4	864.351	0.640372	0.156645	4.08805	4.35e-05	0.000884274
ZDHHC21	170.851	0.646313	0.220365	2.93292	0.00335786	0.0186735
IL22RA1	270.084	0.648812	0.282972	2.29285	0.0218566	0.0708274
HMGCR	1967.08	0.654678	0.161712	4.04841	5.16e-05	0.000983862
EFNB2	1051.21	0.656063	0.240592	2.72687	0.00639378	0.0293809
DCUN1D3	184.95	0.657319	0.161505	4.06996	4.7e-05	0.000928012
NRIP1	1377.44	0.659034	0.204551	3.22185	0.00127366	0.0095006
ADAT1	212.556	0.663507	0.214174	3.09798	0.00194847	0.0127765
SASH1	955.506	0.67873	0.241812	2.80685	0.00500279	0.0246841
GRHL1	1497.53	0.679973	0.24169	2.81341	0.00490187	0.0243066
RSPRY1	317.877	0.697236	0.166159	4.19619	2.71e-05	0.000637234
DNMBP	687.958	0.702826	0.155517	4.51929	6.2e-06	0.000233605
ATP8B1	1674.79	0.703571	0.170158	4.1348	3.55e-05	0.000766315
STT3B	1379.29	0.704661	0.171635	4.10559	4.03e-05	0.000840656
TRPS1	677.815	0.706523	0.266998	2.64617	0.00814083	0.0349585
EHF	4156.2	0.708172	0.261487	2.70825	0.00676399	0.0305237
MAP7	1015.09	0.710517	0.173859	4.08674	4.37e-05	0.000887381
MGAT5	221.005	0.711998	0.292454	2.43457	0.0149096	0.0537069
TFAP2C	961.914	0.715967	0.192983	3.71001	0.000207254	0.0026592
LMTK2	503.178	0.716238	0.247104	2.89853	0.00374919	0.0201116
SRGAP1	336.133	0.718007	0.23269	3.08569	0.00203083	0.0131527
PPM1L	139.206	0.719674	0.300722	2.39315	0.0167042	0.0584042
SGK1	7409.89	0.731382	0.237174	3.08374	0.00204415	0.0132249
VIPR1	110.431	0.731821	0.272682	2.68379	0.00727929	0.0321589
BCAT1	363.185	0.74092	0.286302	2.5879	0.00965637	0.0392919
DDI2	137.46	0.74103	0.297144	2.49384	0.0126368	0.0477428
MFSD2A	405.491	0.742915	0.274685	2.7046	0.00683859	0.0307619
PRR11	229.402	0.744835	0.267173	2.78783	0.00530617	0.0258081
ACTN1	4543.95	0.747695	0.214533	3.48522	0.000491739	0.00491337
ZNF462	362.1	0.75018	0.285496	2.62763	0.00859811	0.0362655
PAK1	1751.8	0.759728	0.173246	4.38526	1.16e-05	0.000366854
SOX6	256.375	0.770992	0.312972	2.46345	0.0137607	0.0507448
C3orf58	1499.01	0.77198	0.194849	3.96194	7.43e-05	0.00129079
TET3	1296.75	0.772525	0.157009	4.92027	8.64e-07	5.93e-05
EVPL	4792.71	0.776248	0.222286	3.49212	0.000479211	0.00482951
MET	1410.2	0.776877	0.289947	2.67937	0.00737602	0.0324471
GRHL3	1656.55	0.779147	0.270932	2.8758	0.00403002	0.0212512
SPTLC2	1519.92	0.781855	0.163203	4.79068	1.66e-06	9.35e-05
HMGCS1	2903.76	0.78251	0.222594	3.51541	0.000439069	0.00453795
ACPP	395.519	0.790443	0.31018	2.54834	0.0108238	0.0426601
AMMECR1	844.067	0.791278	0.17589	4.49872	6.84e-06	0.000248208
SCN8A	35.2303	0.792682	0.333144	2.3794	0.0173408	0.0599781
DYNLT3	940.538	0.799988	0.220508	3.62793	0.000285703	0.00338833
FAM135A	869.623	0.801035	0.190236	4.21076	2.55e-05	0.00060684
MACF1	4992.97	0.803424	0.196173	4.09549	4.21e-05	0.000863999
TSHZ2	177.36	0.814239	0.317134	2.56749	0.0102438	0.0409881
CRISPLD1	146.194	0.822328	0.342371	2.40186	0.0163117	0.0573677
DPP4	109.119	0.8244	0.336764	2.44801	0.0143648	0.0523304
NCOA2	652.612	0.842147	0.307478	2.73889	0.00616472	0.0286423
BMP8A	130.021	0.844849	0.22139	3.81612	0.000135569	0.00198535
SLC7A11	261.046	0.846554	0.366827	2.30777	0.0210117	0.0688929
RCOR1	1466.3	0.8474	0.176304	4.80648	1.54e-06	9.02e-05
LIPH	325.195	0.855784	0.371463	2.30382	0.0212328	0.0693911
SOX21	485.991	0.856839	0.389669	2.19889	0.0278857	0.0847818
RAD54L2	180.963	0.861037	0.261275	3.29552	0.000982404	0.00799484
GTF2A1	197.63	0.870342	0.267803	3.24994	0.0011543	0.0088668
SIAH2	2084.72	0.877831	0.161451	5.43713	5.41e-08	9.03e-06
ZDHHC20	308.079	0.898803	0.309651	2.90264	0.00370037	0.0199187
PDP2	116.02	0.89904	0.194286	4.6274	3.7e-06	0.000165189
PTGS1	921.775	0.901907	0.35242	2.55918	0.0104919	0.0416562
SCIN	285.318	0.911924	0.426709	2.13711	0.032589	0.0945443
TUBB2A	1728.84	0.912332	0.266803	3.4195	0.00062737	0.00583013
PXDN	1454.71	0.916545	0.320921	2.85599	0.00429033	0.0222464
LDLR	4045.2	0.917491	0.217378	4.22071	2.44e-05	0.000590427
CD109	2346.18	0.923028	0.219874	4.19799	2.69e-05	0.000633824
LRRC8A	5047.63	0.932039	0.175711	5.30437	1.13e-07	1.45e-05
ISPD	26.7764	0.93939	0.283051	3.31879	0.00090407	0.00752776
POF1B	950.422	0.94645	0.347449	2.724	0.00644971	0.0295774
BDNF	50.583	0.963609	0.342447	2.81389	0.00489461	0.0242942
DNAH3	22.7867	0.966707	0.363153	2.66198	0.00776822	0.0337273
ABCA1	1128.15	0.99178	0.242934	4.08251	4.46e-05	0.000898931
ARC	26.4439	1.00542	0.469587	2.14108	0.0322677	0.0939165
RAP1GAP2	527.191	1.01431	0.232395	4.3646	1.27e-05	0.000383464
SCD	10684.1	1.04131	0.2227	4.67585	2.93e-06	0.000141244
MAP3K9	228.779	1.0519	0.221104	4.75749	1.96e-06	0.00010696
HIF1A	4994.45	1.05516	0.204106	5.16965	2.35e-07	2.44e-05
PPFIA1	1384.79	1.05997	0.206523	5.13246	2.86e-07	2.83e-05
LRRC8E	522.5	1.06445	0.241161	4.41386	1.02e-05	0.00033246
KLF4	4060.74	1.0679	0.231818	4.60662	4.09e-06	0.000175732
FGF12	42.0732	1.09373	0.437652	2.49909	0.0124513	0.047227
DDX60	1478.42	1.10807	0.295974	3.74381	0.000181249	0.00241864
MME	143.271	1.11329	0.411109	2.70802	0.00676864	0.0305372
SPRR2D	4567.67	1.13395	0.474744	2.38855	0.0169149	0.0589609
PCSK9	1156.25	1.16035	0.287794	4.03187	5.53e-05	0.00103736
DHCR7	1925.39	1.1653	0.217937	5.34695	8.94e-08	1.24e-05
TMEM154	750.07	1.19394	0.267432	4.46444	8.03e-06	0.000280892
SLC16A9	225.702	1.23548	0.41221	2.9972	0.00272474	0.0162307
DEGS2	216.158	1.26414	0.361769	3.49432	0.000475263	0.00479918
SYTL5	48.1751	1.2687	0.571685	2.21923	0.0264713	0.0816403
IGF2BP3	696.423	1.31008	0.354935	3.69103	0.000223351	0.0028126
GABRQ	90.4918	1.3728	0.53257	2.5777	0.00994616	0.0402118
CYP26B1	249.58	1.38179	0.359124	3.84768	0.000119243	0.00180688
B4GALT4	1854.48	1.38872	0.289845	4.79124	1.66e-06	9.35e-05
TPPP	388.332	1.40004	0.307372	4.55487	5.24e-06	0.000207578
GBX2	7.73798	1.40799	0.644329	2.1852	0.0288744	0.0869171
SLC6A11	61.7046	1.42037	0.570296	2.49059	0.0127532	0.0480586
CA2	1199.32	1.45301	0.370652	3.92015	8.85e-05	0.00145075
CYP2C18	372.321	1.48376	0.377885	3.92649	8.62e-05	0.00143278
UPK1B	707.972	1.51825	0.687504	2.20835	0.0272202	0.0832359
ANO1	2110.86	1.55762	0.367513	4.23827	2.25e-05	0.000556858
ATP10B	465.531	1.58645	0.398722	3.97883	6.93e-05	0.00123161
SHISA9	12.766	1.58983	0.716936	2.21753	0.0265871	0.081868
SPRR2E	4420.57	1.61062	0.557042	2.89138	0.0038356	0.0204453
IGSF11	56.1696	1.61965	0.617704	2.62204	0.00874048	0.0367056
B4GALNT3	492.214	1.62028	0.347149	4.66738	3.05e-06	0.000143785
FBN2	606.39	1.62599	0.474148	3.42929	0.000605172	0.00568725
ASPRV1	121.115	1.6574	0.359832	4.60603	4.1e-06	0.00017582
UMODL1	18.5068	1.67087	0.60632	2.75575	0.00585569	0.0276997
HMGA2	197.819	1.69933	0.456381	3.72349	0.00019649	0.00255689
LRRC4	484.239	1.74538	0.392131	4.45101	8.55e-06	0.000292899
NPR3	104.039	2.00106	0.429957	4.65411	3.25e-06	0.000150656
ELF5	64.5194	2.01594	0.616886	3.26793	0.00108336	0.0085214
GSTA1	1158.59	2.37849	0.855318	2.78082	0.00542218	0.0262116
NMUR2	3.60613	3.02263	0.882793	3.42394	0.000617207	0.00576196
KLK14	110.689	3.23673	0.785252	4.1219	3.76e-05	0.000801275
SYCP1	1.5372	3.45487	1.52771	2.26147	0.02373	0.0752545
SPRR2G	387.467	4.31382	0.61932	6.96542	3.27e-12	6.12e-09

## Sheet: TCGA_152sh2_indirect
	baseMean	log2FoldChange	lfcSE	stat	pvalue	padj
KRT38	3.75701	-2.30615	0.955674	-2.41312	0.0158167	0.0560099
NPHS1	15.4177	-2.13886	0.68404	-3.12681	0.00176713	0.0119603
SELE	367.94	-1.73902	0.447253	-3.88823	0.000100977	0.00160157
LOC728392	184.613	-1.67708	0.264906	-6.33085	2.44e-10	1.58e-07
C1orf228	13.4899	-1.66238	0.354277	-4.69232	2.7e-06	0.000132425
CD37	636.663	-1.1641	0.329109	-3.53713	0.000404493	0.00430684
ACAP1	389.448	-1.1345	0.281469	-4.03062	5.56e-05	0.00103971
IL11RA	179.604	-1.11333	0.212724	-5.2337	1.66e-07	1.92e-05
CHI3L1	1589.1	-1.06806	0.413584	-2.58244	0.00981047	0.0397612
C19orf60	532.696	-1.06409	0.192207	-5.53618	3.09e-08	5.96e-06
FBXO2	448.698	-1.05963	0.357717	-2.9622	0.00305446	0.0175505
C10orf10	1281.24	-1.05782	0.268818	-3.93508	8.32e-05	0.00140634
NPDC1	443.955	-1.04559	0.238762	-4.37922	1.19e-05	0.000372019
FBXO44	364.451	-0.973829	0.187474	-5.19447	2.05e-07	2.23e-05
TMC8	955.196	-0.970621	0.271094	-3.58038	0.000343097	0.00386643
RDH16	157.577	-0.962275	0.411907	-2.33615	0.0194837	0.0651551
PRRT2	28.1769	-0.901141	0.306066	-2.94427	0.00323718	0.0182683
PHPT1	1767.01	-0.894859	0.195741	-4.57166	4.84e-06	0.000195848
ANO9	493.195	-0.883089	0.228194	-3.86991	0.000108876	0.00169173
ATAD3C	48.738	-0.879531	0.292613	-3.00578	0.00264897	0.0158892
CMTM2	3.45239	-0.845869	0.3567	-2.37137	0.0177223	0.0608954
TIMP1	3188.2	-0.822073	0.243188	-3.38041	0.000723784	0.0064577
GRAMD1A	966.556	-0.813967	0.215756	-3.77263	0.000161533	0.00225053
NDUFA1	1674.25	-0.782544	0.190995	-4.0972	4.18e-05	0.000861477
RPS27A	4857.88	-0.780549	0.164186	-4.75405	1.99e-06	0.000108474
MAMDC4	176.085	-0.775764	0.33076	-2.3454	0.0190068	0.0640253
RPL26	7272.79	-0.772392	0.167363	-4.61507	3.93e-06	0.000171655
RPS10	3131.84	-0.753146	0.191297	-3.93705	8.25e-05	0.00140039
RPS6	27787.1	-0.747638	0.183856	-4.06643	4.77e-05	0.000939167
RPL13A	10521.6	-0.71833	0.169453	-4.23912	2.24e-05	0.00055673
RPLP2	11205.9	-0.716662	0.175088	-4.09315	4.26e-05	0.000871806
RPS11	20311.1	-0.715732	0.164954	-4.33897	1.43e-05	0.000414645
ODF3B	316.645	-0.692186	0.210787	-3.28382	0.00102411	0.00819601
SLA2	141.941	-0.682914	0.311812	-2.19015	0.0285134	0.0862059
RPS3A	4318.67	-0.679715	0.164295	-4.13717	3.52e-05	0.000762041
SMARCD3	127.457	-0.663577	0.295322	-2.24696	0.0246424	0.0773476
TCEAL1	176.697	-0.662758	0.150589	-4.40111	1.08e-05	0.000347662
RPS25	3904.29	-0.662435	0.170419	-3.8871	0.000101448	0.00160349
C19orf70	888.487	-0.655317	0.184148	-3.55863	0.000372789	0.00409434
SH2D2A	206.01	-0.634237	0.18239	-3.47738	0.000506347	0.0050328
RPS8	16566.1	-0.632723	0.165471	-3.82376	0.00013143	0.0019465
COX7B	2553.58	-0.631767	0.183487	-3.44311	0.000575072	0.00549545
UQCRB	2695.2	-0.606941	0.157567	-3.85195	0.00011718	0.0017919
RPS13	5729.65	-0.603389	0.145072	-4.15923	3.19e-05	0.000713983
JOSD2	463.906	-0.591604	0.176889	-3.34449	0.000824348	0.00708599
HSF4	102.806	-0.5891	0.258538	-2.27859	0.0226917	0.072846
VAMP8	2513.78	-0.586854	0.13772	-4.26122	2.03e-05	0.000519911
ANKRD22	870.968	-0.585778	0.264449	-2.21509	0.0267539	0.08218
HIGD2A	1297.78	-0.582713	0.160867	-3.62233	0.000291966	0.00344256
BTN3A1	767.509	-0.579969	0.218155	-2.65852	0.00784841	0.0339709
HMOX1	866.855	-0.577817	0.215622	-2.67977	0.00736718	0.0324237
LYSMD2	260.138	-0.576866	0.153671	-3.7539	0.000174108	0.00237042
RPS2	8061.89	-0.571765	0.167614	-3.4112	0.000646787	0.00595323
GSTK1	1835.62	-0.571712	0.125625	-4.55093	5.34e-06	0.000209691
ZFYVE28	103.16	-0.570646	0.20517	-2.78134	0.00541358	0.0261825
FAM117A	443.173	-0.570557	0.230709	-2.47306	0.0133963	0.0497109
RPL23	10070.9	-0.570005	0.155957	-3.65488	0.000257302	0.00314718
TGIF2	1086.67	-0.569834	0.224142	-2.54229	0.0110128	0.0432147
UBA7	1177.26	-0.557388	0.212081	-2.62819	0.00858412	0.0362149
IRF3	1544.9	-0.5565	0.128664	-4.32523	1.52e-05	0.00043313
RPS16	13820.2	-0.547511	0.164947	-3.31932	0.000902373	0.00752388
SFI1	490.903	-0.545111	0.148845	-3.66228	0.00024998	0.0030658
MITD1	277.247	-0.54346	0.118195	-4.59799	4.27e-06	0.000179387
RPS3	20225.5	-0.542055	0.1796	-3.01812	0.00254347	0.015447
IER5L	568.371	-0.541944	0.216384	-2.50455	0.0122608	0.0467362
TMEM219	1418.08	-0.539155	0.123749	-4.35683	1.32e-05	0.000390865
PARP6	887.772	-0.538288	0.137325	-3.91981	8.86e-05	0.00145075
BST2	4520.82	-0.536828	0.245221	-2.18916	0.0285851	0.0863154
WDR54	310.403	-0.536341	0.217761	-2.46298	0.0137787	0.0507802
ABCA2	1245.21	-0.536072	0.222495	-2.40936	0.0159805	0.0564553
KIFC2	475.964	-0.535507	0.247852	-2.16059	0.0307266	0.0907349
MAN2C1	747.382	-0.524574	0.11715	-4.47781	7.54e-06	0.000267814
BAG1	2231.13	-0.520497	0.172861	-3.01107	0.00260328	0.0156856
ACADVL	4920.98	-0.507836	0.156551	-3.2439	0.00117904	0.0089999
TTYH2	120.428	-0.505196	0.220933	-2.28665	0.0222164	0.071626
RPL4	19519.9	-0.504519	0.150822	-3.34512	0.000822474	0.00707484
ATP5G1	1347.2	-0.499683	0.175463	-2.8478	0.00440227	0.0225968
VEGFB	1203.91	-0.492407	0.146602	-3.35881	0.000782803	0.0068542
COX6B1	3675.39	-0.492006	0.153453	-3.20624	0.00134482	0.00985201
RPL27	10870.8	-0.491619	0.147095	-3.34218	0.000831246	0.00711206
RRAS	876.892	-0.479871	0.188761	-2.54222	0.0110151	0.0432147
RPS15A	9740.39	-0.477391	0.159927	-2.98506	0.00283523	0.016663
ABHD14A	142.33	-0.476487	0.161977	-2.94169	0.00326425	0.0183645
LETMD1	730.968	-0.46693	0.134606	-3.46886	0.000522665	0.00514942
TOP1MT	680.791	-0.464173	0.202387	-2.29349	0.0218196	0.07077
RPL22	5870.22	-0.463946	0.137588	-3.372	0.000746252	0.00661311
SERPINB6	1675.47	-0.462798	0.183654	-2.51994	0.0117374	0.0452205
UFC1	1434.13	-0.458928	0.123566	-3.71404	0.000203977	0.00262765
ATP5D	1602.48	-0.454883	0.186549	-2.4384	0.0147523	0.0532985
CRELD1	361.273	-0.453853	0.148685	-3.05245	0.00226982	0.0142525
RPS5	12453.9	-0.452008	0.170562	-2.65011	0.00804651	0.03465
THAP8	116.35	-0.451377	0.196886	-2.29258	0.021872	0.0708526
ARL6IP5	2176.19	-0.450343	0.144597	-3.11447	0.00184278	0.0123132
RPL6	6118.34	-0.444747	0.133329	-3.33571	0.000850819	0.0072456
RNF215	170.562	-0.435431	0.135992	-3.20189	0.0013653	0.00993745
GALT	361.01	-0.416941	0.130706	-3.18991	0.00142317	0.0102367
SERTAD1	738.763	-0.41451	0.157158	-2.63754	0.00835086	0.0355333
ABHD14B	1016.38	-0.411753	0.153133	-2.68886	0.00716964	0.0318069
CIB1	2768.03	-0.4049	0.175196	-2.31113	0.0208257	0.0684085
EIF3K	4333.18	-0.402301	0.147467	-2.72807	0.00637065	0.0293187
COX5B	2276.52	-0.39955	0.175899	-2.27147	0.0231187	0.0738084
PIM3	2679.43	-0.39943	0.15211	-2.62593	0.00864128	0.0363974
ST6GALNAC6	1012.31	-0.398702	0.125786	-3.16968	0.00152607	0.0107576
MAST3	385.266	-0.39659	0.133316	-2.97481	0.0029317	0.0170156
GNB2L1	24700.9	-0.396347	0.143324	-2.7654	0.00568538	0.0271109
RPL7A	10332.5	-0.395734	0.159695	-2.47806	0.0132099	0.0491684
HMGN4	1443.58	-0.391251	0.0941065	-4.15753	3.22e-05	0.000717417
ST6GALNAC4	473.608	-0.390789	0.1459	-2.67847	0.00739596	0.032488
MRPL24	1034.19	-0.388457	0.145476	-2.67025	0.00757937	0.0331349
NDUFB3	758.5	-0.38841	0.144888	-2.68076	0.0073455	0.0323361
RAB13	1335.46	-0.38663	0.127214	-3.03922	0.00237194	0.0147073
FAM127B	1133.05	-0.378913	0.176473	-2.14715	0.0317816	0.0929371
OGFR	1484.72	-0.378776	0.14183	-2.67064	0.00757059	0.033107
RPSAP58	10004	-0.377541	0.172541	-2.18812	0.0286606	0.0864296
IFT74	254.751	-0.377135	0.132208	-2.8526	0.00433637	0.0224027
MGC16275	32.2166	-0.374199	0.147647	-2.53442	0.0112634	0.0438741
TAPBP	9382.77	-0.373116	0.171948	-2.16994	0.0300117	0.0892417
MYPOP	236.961	-0.371556	0.12199	-3.0458	0.00232063	0.0144872
TP53TG1	317.118	-0.369767	0.170971	-2.16275	0.0305607	0.0904051
ERGIC3	4168.88	-0.369142	0.141548	-2.60789	0.0091103	0.0377827
IFT46	315.658	-0.367709	0.130525	-2.81716	0.00484498	0.0241131
TMEM147	1161.34	-0.362701	0.135155	-2.68358	0.00728378	0.0321589
MIB2	804.714	-0.354776	0.155703	-2.27855	0.0226941	0.072846
RABGGTB	753.224	-0.35453	0.126802	-2.79594	0.0051749	0.0253289
NDUFV1	3193.67	-0.352917	0.165435	-2.13327	0.0329024	0.0951522
COX7A2	1951.39	-0.35255	0.144503	-2.43974	0.014698	0.0531745
ZNHIT1	1138.98	-0.351051	0.156642	-2.24111	0.0250192	0.0781478
STX4	955.558	-0.344246	0.121577	-2.8315	0.00463308	0.0234209
METTL5	519.47	-0.343492	0.119397	-2.8769	0.00401604	0.0211957
ZNF605	331.402	-0.333487	0.130291	-2.55955	0.0104807	0.0416209
EEF1A1	56219.4	-0.313294	0.140058	-2.23689	0.0252935	0.0788245
PSMD13	2805.62	-0.305973	0.121223	-2.52406	0.0116008	0.0448431
COX19	364.829	-0.298984	0.109615	-2.72757	0.00638019	0.0293479
MAGED2	2368.56	-0.298724	0.13958	-2.14017	0.0323412	0.094023
SERTAD3	727.572	-0.293946	0.127336	-2.30843	0.0209752	0.0688102
TMEM39B	508.73	-0.291187	0.107724	-2.70307	0.00687015	0.0308358
LACTB	329.442	-0.289172	0.12286	-2.35368	0.0185886	0.0628961
PBXIP1	2284.23	-0.284241	0.132531	-2.14472	0.0319754	0.0932956
HEXIM1	1345.47	-0.282425	0.0902334	-3.12994	0.00174839	0.0118685
MLLT6	3633.34	-0.277809	0.106864	-2.59964	0.00933212	0.0383868
MAP2K2	2707.81	-0.277715	0.122061	-2.27522	0.0228929	0.0733172
ATP5A1	11340.7	-0.262131	0.113349	-2.3126	0.0207448	0.068213
TMEM9	1454.25	-0.253943	0.11337	-2.23995	0.0250944	0.0783293
MORF4L1	2508.06	-0.239508	0.084749	-2.82608	0.00471215	0.0236964
GNAI2	5316.13	-0.195489	0.0908005	-2.15295	0.0313225	0.0919612
HNRNPR	3701.07	0.164535	0.0541956	3.03596	0.00239775	0.0148023
SLC25A44	886.404	0.172524	0.0729564	2.36475	0.018042	0.0616104
CPSF7	2280.46	0.192694	0.0786089	2.45131	0.0142339	0.0521019
SF3B4	2595.15	0.228179	0.0903393	2.5258	0.0115435	0.0446767
MAML1	1468.65	0.228606	0.0990294	2.30847	0.020973	0.0688102
BRD1	1067.08	0.230741	0.09965	2.31551	0.0205849	0.0677844
RNF40	2470.23	0.23188	0.0922412	2.51384	0.0119423	0.0458369
TOP3A	655.323	0.237545	0.109594	2.16749	0.0301974	0.0896342
HCFC1	3005.02	0.247475	0.0973987	2.54084	0.0110586	0.0432691
CHTF8	2628.13	0.248585	0.0813614	3.05532	0.00224821	0.014162
CRAMP1L	769.081	0.254956	0.116246	2.19324	0.02829	0.0856565
LYPLA1	1386.59	0.257103	0.108852	2.36194	0.0181797	0.0619563
PCNXL3	2029.91	0.25738	0.0938997	2.74101	0.00612509	0.0285376
SRCAP	4412.69	0.259767	0.116214	2.23524	0.0254017	0.0790821
G3BP2	2809.82	0.271097	0.106059	2.55609	0.0105857	0.0419471
E2F4	1474.23	0.275073	0.129944	2.11685	0.0342723	0.0980265
ATMIN	1291.95	0.277288	0.104966	2.64169	0.00824926	0.0352729
CHERP	1750.72	0.279185	0.0870659	3.20659	0.00134318	0.00985201
TMEM104	666.059	0.280363	0.0941191	2.97881	0.00289367	0.0168881
HSPA8	20582.1	0.2815	0.128532	2.19012	0.0285159	0.0862059
CBFB	1289.19	0.28225	0.114379	2.46769	0.0135989	0.0502999
MTFR1	724.712	0.282451	0.13086	2.15842	0.030895	0.0910414
LARP4B	1704.57	0.282462	0.0907841	3.11137	0.00186224	0.0123841
NCAPD2	4247.32	0.28257	0.131438	2.14983	0.0315685	0.0924468
VPRBP	842.616	0.286255	0.124823	2.2933	0.0218309	0.0707729
DNMT1	3967.67	0.286748	0.110168	2.60284	0.00924554	0.038151
RBM25	1799.83	0.291548	0.0961166	3.03328	0.00241914	0.0148742
GPR107	3245.26	0.294654	0.113339	2.59977	0.00932866	0.0383844
DDX52	609.59	0.296366	0.0871176	3.40191	0.000669165	0.00610128
SEC63	1563.18	0.296799	0.101048	2.93722	0.00331168	0.018529
AARS	3265.65	0.298354	0.1068	2.79358	0.00521288	0.0254603
KPNA2	4515.64	0.30499	0.120017	2.54123	0.0110463	0.0432489
SAP130	908.74	0.31337	0.0833048	3.76173	0.000168743	0.0023245
CTCF	1533.81	0.318314	0.0783027	4.06517	4.8e-05	0.0009422
AMFR	1802.15	0.318372	0.11884	2.679	0.00738419	0.0324674
KHSRP	3577.75	0.320075	0.096997	3.29985	0.000967373	0.00790409
TMED10P1	50.0177	0.32136	0.136243	2.35873	0.0183374	0.0622854
LETM1	1563.42	0.32523	0.104701	3.10628	0.00189457	0.0125133
DHTKD1	988.034	0.327105	0.121017	2.70297	0.00687225	0.0308377
ARHGEF11	1105.89	0.331235	0.123957	2.67218	0.00753594	0.0329922
TOB2	1298.89	0.331472	0.112939	2.93496	0.00333588	0.018602
PTAR1	843.11	0.33171	0.142365	2.33	0.0198062	0.0659654
C2orf69	390.231	0.331846	0.103704	3.19993	0.0013746	0.00997358
GSTCD	330.672	0.33208	0.1433	2.31738	0.020483	0.0675458
SPTAN1	6264.33	0.332189	0.110909	2.99516	0.00274304	0.0163185
LARP1	5089.25	0.334065	0.1015	3.29128	0.000997311	0.00804784
XPO5	1402.61	0.335831	0.102295	3.28296	0.00102722	0.0082137
PGAM5	821.515	0.338826	0.104492	3.24262	0.00118437	0.00902391
TOPBP1	2361.93	0.349896	0.159437	2.19457	0.0281945	0.0854881
KRIT1	605.877	0.350151	0.109939	3.18495	0.00144779	0.0103574
SYNJ1	363.294	0.350963	0.141234	2.48496	0.0129565	0.0485184
MED1	1348.12	0.354929	0.109234	3.24927	0.00115701	0.00887653
STIP1	4115.15	0.361165	0.112863	3.20002	0.00137418	0.00997358
LIN52	191.685	0.361961	0.169113	2.14035	0.0323267	0.0940213
GNA11	565.314	0.379466	0.165443	2.29363	0.0218116	0.0707565
UHRF1	1171.24	0.381359	0.142317	2.67965	0.00736993	0.0324281
POLR1B	632.349	0.382035	0.0985784	3.87544	0.000106431	0.00166361
CHML	567.611	0.382086	0.157616	2.42416	0.0153438	0.0549362
GSPT1	3270.88	0.383309	0.0970156	3.95101	7.78e-05	0.00133981
ZNF518A	399.203	0.387423	0.151484	2.55752	0.0105422	0.0417974
NACC1	2089.29	0.388836	0.110334	3.52416	0.000424833	0.00444563
SELT	2015.9	0.389804	0.106693	3.65352	0.000258672	0.00315552
TRIM59	574.832	0.394663	0.18524	2.13055	0.0331258	0.0956777
PSKH1	815.367	0.395863	0.118958	3.32774	0.000875523	0.00737152
ZBTB26	68.1922	0.397916	0.177903	2.2367	0.0253061	0.078829
GPATCH8	1370.67	0.420879	0.11153	3.77368	0.000160859	0.00224455
ACTL6A	2441.94	0.423067	0.125744	3.36451	0.000766805	0.00673664
HIATL1	2023.69	0.436539	0.113658	3.8408	0.000122635	0.00185215
NUP188	3116.95	0.438019	0.111831	3.91681	8.97e-05	0.00145979
MON1B	721.77	0.440521	0.135044	3.26205	0.0011061	0.00863364
UEVLD	227.936	0.441765	0.166688	2.65024	0.00804341	0.03465
PTPN21	307.965	0.445068	0.181311	2.45472	0.0140995	0.0517237
LOC652276	34.6352	0.45093	0.133562	3.37618	0.000734999	0.00652917
ERBB3	2384.88	0.451534	0.184499	2.44736	0.0143909	0.0524148
SLC35A5	695.612	0.468611	0.127477	3.67604	0.000236883	0.00294858
DCAF7	2979.7	0.476336	0.119882	3.97339	7.09e-05	0.00125282
CPSF2	1481.58	0.477021	0.110697	4.30925	1.64e-05	0.000454668
ACLY	2797.56	0.477663	0.128589	3.71465	0.000203481	0.0026255
LOC220729	181.267	0.518013	0.183348	2.8253	0.00472363	0.0237251
EPHA1	880.808	0.526239	0.180489	2.91563	0.00354966	0.0193354
CIRH1A	1094.92	0.535501	0.13601	3.93723	8.24e-05	0.00140039
CNOT1	5534.85	0.550811	0.113707	4.84413	1.27e-06	7.88e-05
HIC2	206.59	0.559605	0.184439	3.0341	0.00241256	0.0148637
KIAA1671	2709.22	0.565712	0.169264	3.34219	0.000831204	0.00711206
GNPNAT1	999.084	0.589149	0.177957	3.31063	0.000930857	0.00769836
ICK	743.597	0.598357	0.167391	3.57461	0.00035075	0.00392321
HIST2H2BE	459.786	0.599187	0.264186	2.26804	0.0233265	0.0743939
C5orf51	919.214	0.600959	0.109312	5.49763	3.85e-08	7.03e-06
ZSCAN12P1	17.0413	0.621969	0.26555	2.34219	0.0191707	0.0644
SH3D19	997.46	0.623422	0.187868	3.31841	0.000905327	0.00753138
HIST1H2AM	7.51848	0.634246	0.301105	2.10639	0.0351702	0.099914
FAM89A	300.328	0.68435	0.278476	2.45749	0.0139913	0.0513677
NUP155	993.296	0.737699	0.160506	4.59609	4.3e-06	0.000180106
HIST1H2AE	36.5623	0.760208	0.346282	2.19534	0.028139	0.0853685
ATL3	742.581	0.765873	0.161822	4.73282	2.21e-06	0.000115666
KLF8	225.413	0.812067	0.338216	2.40103	0.0163491	0.0574696
SULT2B1	877.544	0.830456	0.320317	2.5926	0.00952526	0.0389313
KCNE3	237.015	0.886653	0.33167	2.6733	0.00751088	0.0329061
HIST1H2BE	22.7458	0.925464	0.302813	3.05622	0.00224143	0.0141371
HIST1H3H	27.1124	1.00392	0.332624	3.01818	0.00254302	0.015447
KLK10	2849.55	1.50085	0.543972	2.75906	0.00579686	0.0274923
RNASE10	9.19507	1.60323	0.752187	2.13143	0.0330541	0.0955157
TDRD9	227.588	1.7279	0.706864	2.44445	0.0145071	0.0526959
LCE3E	72.1694	1.99165	0.622571	3.19907	0.00137873	0.00999551
LCE3D	257.812	2.0675	0.572192	3.6133	0.000302323	0.00353513
FIBCD1	22.0107	2.36104	0.575036	4.1059	4.03e-05	0.000840656
GLYATL2	66.052	2.46662	0.640977	3.84823	0.000118977	0.00180606
ALOX15	117.702	3.51827	0.622868	5.6485	1.62e-08	3.85e-06

## Sheet: Combined_p63_signature
	TCGA log2FC		SCC104 sh50 log2FC
SP5	-2.30738	SP5	2.2935
SNORA63	-2.03198	SNORA63	0.65052
EEF1A2	-1.73541	EEF1A2	3.18644
CENPV	-1.66932	CENPV	0.948694
STXBP6	-1.59354	STXBP6	2.86317
CLDN9	-1.5881	CLDN9	2.5089
APLP1	-1.54142	APLP1	2.08641
KRT4	-1.49683	KRT4	2.67993
RBM24	-1.39847	RBM24	2.54726
MSLN	-1.37207	MSLN	0.659357
TNFRSF19	-1.36447	TNFRSF19	5.82521
KCNG1	-1.31558	KCNG1	1.24326
ISYNA1	-1.28882	ISYNA1	0.554144
STMN3	-1.25656	STMN3	1.05323
E2F1	-1.03497	E2F1	1.03636
PLA2G16	-1.01424	PLA2G16	1.78218
BAMBI	-1.00888	BAMBI	2.68525
PKN1	-0.972437	PKN1	1.76681
PIF1	-0.9553	PIF1	1.58939
SCG2	-0.932611	SCG2	4.44079
PSCA	-0.925484	PSCA	2.79127
PLEKHA6	-0.912008	PLEKHA6	1.82975
S100A4	-0.909753	S100A4	1.08212
EFHD1	-0.904933	EFHD1	2.30071
CTSH	-0.894992	CTSH	0.247354
CYFIP2	-0.869242	CYFIP2	5.3646
TMEM56	-0.852081	TMEM56	2.6572
ST3GAL4	-0.839885	ST3GAL4	0.75556
MXD3	-0.838398	MXD3	1.32742
TRPM2	-0.821023	TRPM2	3.32584
DAPK2	-0.819832	DAPK2	2.61004
ATP8A1	-0.756584	ATP8A1	2.97325
RECQL4	-0.730281	RECQL4	0.596352
FMNL1	-0.724508	FMNL1	1.58307
MDK	-0.689646	MDK	1.4647
RARRES3	-0.68922	RARRES3	1.44496
C21orf58	-0.687109	C21orf58	1.01569
CENPM	-0.68548	CENPM	0.921452
PODXL	-0.676869	PODXL	0.718471
RALY	-0.645862	RALY	0.551015
GTF3A	-0.645833	GTF3A	0.517443
CFL2	-0.642003	CFL2	0.941726
DPYSL2	-0.625128	DPYSL2	1.35782
TOX	-0.620089	TOX	4.14077
UCP2	-0.618957	UCP2	0.737793
ARHGDIB	-0.614991	ARHGDIB	0.855953
LRRC61	-0.612612	LRRC61	1.48591
PBK	-0.610761	PBK	0.74628
USP13	-0.609958	USP13	1.40851
CD99L2	-0.601636	CD99L2	0.588683
TRIM8	-0.595013	TRIM8	0.860133
MAN2A2	-0.591636	MAN2A2	1.14511
MYBL1	-0.585314	MYBL1	2.03483
MGAT4A	-0.583388	MGAT4A	1.06457
RASSF7	-0.580982	RASSF7	0.725959
C16orf59	-0.572629	C16orf59	1.38156
HYLS1	-0.572082	HYLS1	1.51509
HABP4	-0.563719	HABP4	1.3197
PRKCDBP	-0.557305	PRKCDBP	1.06764
FDX1L	-0.556847	FDX1L	0.552736
TRAF5	-0.555323	TRAF5	0.804271
KRT18	-0.550291	KRT18	0.778508
CDKN3	-0.54906	CDKN3	0.503205
RCN1	-0.544121	RCN1	0.505552
HMGN2	-0.543703	HMGN2	0.381054
GLIPR2	-0.540902	GLIPR2	1.39032
WDR34	-0.532665	WDR34	0.578178
TSPAN17	-0.532291	TSPAN17	0.709342
CDKN2C	-0.506713	CDKN2C	1.90037
SH3KBP1	-0.505552	SH3KBP1	1.11846
CHMP4B	-0.483632	CHMP4B	0.307999
SLC9A3R2	-0.480273	SLC9A3R2	0.8182
SORBS3	-0.477161	SORBS3	1.21353
C14orf80	-0.470654	C14orf80	0.891111
HMGB2	-0.465091	HMGB2	1.51747
LGALS3	-0.464171	LGALS3	1.06814
ABHD12	-0.46322	ABHD12	0.789552
LTBP3	-0.456851	LTBP3	0.827599
AK1	-0.450336	AK1	0.451253
DTYMK	-0.442516	DTYMK	0.532549
FYN	-0.439351	FYN	1.99832
UBE2C	-0.435866	UBE2C	0.305089
CKS2	-0.432243	CKS2	0.441802
LSM10	-0.426122	LSM10	0.620869
TOR3A	-0.420891	TOR3A	0.438523
CDK2AP2	-0.420675	CDK2AP2	0.441057
ERP29	-0.419977	ERP29	0.357522
ABCA7	-0.419727	ABCA7	0.830681
PATZ1	-0.41253	PATZ1	0.912086
MARCKSL1	-0.411003	MARCKSL1	1.37342
UBE2T	-0.40962	UBE2T	0.590846
TROAP	-0.409378	TROAP	0.61003
PSRC1	-0.408923	PSRC1	1.0785
ZMIZ2	-0.408079	ZMIZ2	0.474225
HMGN1	-0.4066	HMGN1	0.203128
FNBP1	-0.405581	FNBP1	0.52303
PGP	-0.397018	PGP	0.326554
C19orf25	-0.393067	C19orf25	0.678764
NR2F6	-0.386309	NR2F6	0.715014
TRAIP	-0.386214	TRAIP	0.634729
POC1A	-0.383228	POC1A	0.767394
KIF22	-0.381876	KIF22	0.618858
PPDPF	-0.373307	PPDPF	0.508449
ANP32A	-0.370172	ANP32A	0.356452
GLCCI1	-0.363062	GLCCI1	0.874745
PWWP2B	-0.357506	PWWP2B	0.725576
TESK1	-0.35576	TESK1	0.937619
CDKN2D	-0.350737	CDKN2D	0.878033
DSCC1	-0.34079	DSCC1	0.331612
PKN3	-0.339441	PKN3	0.64867
MBD3	-0.338745	MBD3	0.411393
RUFY3	-0.330795	RUFY3	1.02884
SNRPC	-0.321951	SNRPC	0.347298
KLHL22	-0.317074	KLHL22	0.814397
NANS	-0.315645	NANS	0.290023
XRCC1	-0.312369	XRCC1	0.501955
CLN6	-0.308302	CLN6	0.635039
UROS	-0.305944	UROS	0.758369
RAD54L	-0.304152	RAD54L	0.504933
RBM42	-0.301714	RBM42	0.319062
PAQR4	-0.293728	PAQR4	0.520553
MAPKAPK2	-0.28022	MAPKAPK2	0.368796
SNAPC5	-0.271591	SNAPC5	0.742793
NFYB	-0.270644	NFYB	0.855466
CALM2	-0.252434	CALM2	0.797867
DAZAP1	-0.223963	DAZAP1	0.272887
EIF2B3	-0.216665	EIF2B3	0.39725
ASH2L	-0.201076	ASH2L	0.381936
ZMYM6	0.179772	ZMYM6	-0.548529
SNIP1	0.19471	SNIP1	-0.468972
FAM53C	0.211382	FAM53C	-0.857045
MCL1	0.225623	MCL1	-1.03027
ARCN1	0.238415	ARCN1	-0.314979
MKNK1	0.243299	MKNK1	-0.602353
EPN2	0.248547	EPN2	-0.334988
NRBF2	0.262271	NRBF2	-0.526879
NCBP2	0.269392	NCBP2	-0.803468
LEO1	0.272883	LEO1	-0.4393
PPIP5K1	0.275581	PPIP5K1	-0.395536
METTL8	0.276094	METTL8	-0.619931
SFXN1	0.289206	SFXN1	-0.507253
KLHL36	0.295862	KLHL36	-0.843535
MIDN	0.29613	MIDN	-0.891966
RNF141	0.296775	RNF141	-1.02232
PIAS2	0.301615	PIAS2	-0.295927
BTBD10	0.303	BTBD10	-0.53924
CLNS1A	0.30436	CLNS1A	-0.267221
RALGDS	0.305101	RALGDS	-0.785603
NET1	0.307632	NET1	-1.63479
WDR37	0.309387	WDR37	-1.04091
RBMXL1	0.309958	RBMXL1	-0.944171
DGKA	0.322357	DGKA	-1.06644
KLHL21	0.323848	KLHL21	-1.30779
EIF2A	0.324655	EIF2A	-0.308538
CCNYL1	0.32565	CCNYL1	-0.550805
DBT	0.328054	DBT	-0.679394
ACTR3	0.33474	ACTR3	-0.43063
PURB	0.337175	PURB	-0.558684
EXOC8	0.340335	EXOC8	-0.858994
PTPRF	0.342183	PTPRF	-0.530681
ATRN	0.342324	ATRN	-0.222993
SRXN1	0.343288	SRXN1	-1.02555
CHMP1B	0.345048	CHMP1B	-0.326645
RDX	0.347886	RDX	-0.206883
YOD1	0.34848	YOD1	-0.645794
DNAJC5	0.349562	DNAJC5	-0.281266
PTK7	0.350358	PTK7	-0.474419
ARL5A	0.352041	ARL5A	-0.552743
TMEM123	0.354333	TMEM123	-0.449121
PPARA	0.354907	PPARA	-0.480396
FRMD8	0.357386	FRMD8	-1.08524
PRICKLE3	0.357814	PRICKLE3	-0.897111
RNF2	0.35823	RNF2	-0.404483
SH3PXD2A	0.362189	SH3PXD2A	-3.43558
AHDC1	0.363304	AHDC1	-1.25312
B3GNT2	0.365522	B3GNT2	-0.656719
OXSR1	0.368675	OXSR1	-1.24868
MTM1	0.375797	MTM1	-0.615257
NUAK2	0.378029	NUAK2	-1.98155
TMEM63B	0.378806	TMEM63B	-1.37456
RLF	0.381203	RLF	-0.251095
TRAF3IP2	0.381307	TRAF3IP2	-0.424616
LIMK2	0.3902	LIMK2	-0.553899
DUSP18	0.399058	DUSP18	-1.08644
SCAMP1	0.404385	SCAMP1	-0.324305
NCOA3	0.407629	NCOA3	-0.48174
PARD6G	0.408785	PARD6G	-1.47118
SHC1	0.410028	SHC1	-1.60093
PPFIBP1	0.413879	PPFIBP1	-0.746474
ALG3	0.414557	ALG3	-0.281287
MFN2	0.414748	MFN2	-0.218961
FAM69A	0.415022	FAM69A	-0.707213
SH3BP1	0.415168	SH3BP1	-1.27528
SERPINB8	0.42069	SERPINB8	-1.61969
WDR47	0.424405	WDR47	-1.26708
CSNK1G1	0.427002	CSNK1G1	-0.441589
DDR1	0.431576	DDR1	-0.833921
PRKX	0.432405	PRKX	-1.36103
MTF1	0.433168	MTF1	-0.619634
RAB18	0.436523	RAB18	-0.770116
ITPRIP	0.43741	ITPRIP	-0.590849
TRAF7	0.437651	TRAF7	-0.230799
SSH3	0.441655	SSH3	-0.434152
TMEM159	0.445029	TMEM159	-0.550843
SLC6A6	0.448949	SLC6A6	-0.764116
LRP1	0.450525	LRP1	-0.95107
NAB1	0.45086	NAB1	-0.602517
PRNP	0.453938	PRNP	-1.72512
ZNF800	0.454122	ZNF800	-1.16754
FZD6	0.459533	FZD6	-0.770345
RAB22A	0.461406	RAB22A	-0.325034
UBA6	0.463523	UBA6	-0.332334
MORC3	0.46857	MORC3	-0.297322
MYO1E	0.469929	MYO1E	-0.543927
KCTD15	0.47044	KCTD15	-0.460931
SDC1	0.470775	SDC1	-0.914097
DAB2IP	0.474712	DAB2IP	-1.59878
COL7A1	0.481825	COL7A1	-1.70395
EXT1	0.48573	EXT1	-0.468237
SSR1	0.486589	SSR1	-0.208547
TNFRSF21	0.488466	TNFRSF21	-1.5563
PDCD6IP	0.493619	PDCD6IP	-0.204555
CNST	0.50893	CNST	-0.417745
ERMP1	0.509579	ERMP1	-0.678531
MSN	0.511213	MSN	-0.316683
TPM4	0.511705	TPM4	-0.750091
PFKP	0.512188	PFKP	-0.35762
FMNL2	0.514141	FMNL2	-1.27239
MYO9A	0.52136	MYO9A	-0.755855
NDFIP2	0.523185	NDFIP2	-0.216408
XPR1	0.525002	XPR1	-0.660414
ENTPD7	0.535868	ENTPD7	-1.55109
LRRC8B	0.536013	LRRC8B	-1.90183
ARHGEF12	0.537368	ARHGEF12	-0.185251
PFKFB2	0.542323	PFKFB2	-0.275934
HR	0.552221	HR	-1.3832
DYNC2H1	0.555132	DYNC2H1	-0.36534
GM2A	0.556426	GM2A	-1.03754
ATP2A2	0.556786	ATP2A2	-0.813673
PLEKHA1	0.557305	PLEKHA1	-1.07181
ITGA2	0.560393	ITGA2	-1.12955
ADORA2B	0.560803	ADORA2B	-0.817146
F11R	0.579323	F11R	-0.761438
DHCR24	0.580479	DHCR24	-0.352327
MYC	0.593629	MYC	-2.14359
OSMR	0.605464	OSMR	-0.712122
NFE2L2	0.605668	NFE2L2	-0.495496
HSPA4L	0.606494	HSPA4L	-0.448076
KLC3	0.607331	KLC3	-0.556254
TACC2	0.607415	TACC2	-1.32889
MDFI	0.61358	MDFI	-1.67782
IMPA2	0.613665	IMPA2	-0.902286
LRRFIP1	0.614765	LRRFIP1	-0.371872
ABHD6	0.61549	ABHD6	-1.44725
ERC1	0.616706	ERC1	-0.442148
LAD1	0.625733	LAD1	-0.708043
DUOX1	0.63016	DUOX1	-0.934346
YWHAZ	0.631255	YWHAZ	-0.236373
CAV2	0.639102	CAV2	-0.862719
NDRG1	0.641142	NDRG1	-2.88115
TNFAIP1	0.642	TNFAIP1	-1.51823
ERG	0.644496	ERG	-2.17417
DUSP7	0.645327	DUSP7	-3.37672
PPARD	0.646191	PPARD	-1.07072
UBE2H	0.652127	UBE2H	-0.219701
TRIM29	0.653777	TRIM29	-1.66009
MAOA	0.65901	MAOA	-2.15472
LNPEP	0.660566	LNPEP	-0.296343
MTSS1	0.661807	MTSS1	-0.448117
DGKH	0.662301	DGKH	-0.574156
TMEM185B	0.664516	TMEM185B	-0.52797
SLC39A6	0.67091	SLC39A6	-0.304148
APCDD1	0.673634	APCDD1	-3.15549
RIN2	0.675168	RIN2	-0.275037
RCAN1	0.675292	RCAN1	-1.41796
FGFR3	0.676274	FGFR3	-2.21179
CDCP1	0.680557	CDCP1	-0.283791
ADAM17	0.680963	ADAM17	-0.37332
FSCN1	0.682304	FSCN1	-0.956391
HK2	0.682953	HK2	-0.717384
GPC1	0.692186	GPC1	-1.23674
SERINC2	0.693196	SERINC2	-0.619337
TUBA4A	0.693874	TUBA4A	-0.306054
KIF16B	0.694813	KIF16B	-0.827132
SHROOM2	0.694895	SHROOM2	-2.84737
DUOXA1	0.700003	DUOXA1	-0.621729
LTB4R	0.701322	LTB4R	-0.913528
CORO1C	0.7018	CORO1C	-0.453231
CPNE8	0.70457	CPNE8	-0.735657
CLDND1	0.705463	CLDND1	-0.907336
PALLD	0.709665	PALLD	-0.239477
MYO5A	0.712961	MYO5A	-0.335495
CMIP	0.713182	CMIP	-0.400505
OLFML2A	0.718449	OLFML2A	-0.587196
LIMA1	0.71851	LIMA1	-1.06534
CCNT1	0.728014	CCNT1	-0.481976
PAFAH1B2	0.743554	PAFAH1B2	-0.324849
TUFT1	0.743866	TUFT1	-0.702612
CELSR1	0.746496	CELSR1	-1.3659
B3GNT5	0.746878	B3GNT5	-0.569143
CYP2S1	0.752443	CYP2S1	-1.84264
PVRL1	0.758106	PVRL1	-1.1429
JAG1	0.758907	JAG1	-1.05775
CLSTN1	0.765357	CLSTN1	-0.58694
MAST4	0.768673	MAST4	-0.967525
RAET1G	0.768677	RAET1G	-2.26894
PLEC	0.769344	PLEC	-0.73578
IPPK	0.773066	IPPK	-1.22006
JUP	0.776429	JUP	-0.694045
SRPK2	0.784853	SRPK2	-0.689783
ECM1	0.787196	ECM1	-2.69279
COL17A1	0.787424	COL17A1	-1.53736
ITGB4	0.791787	ITGB4	-0.977571
VSIG1	0.792916	VSIG1	-1.54745
SCN4B	0.794832	SCN4B	-3.47823
CAV1	0.796054	CAV1	-0.999052
FERMT1	0.797612	FERMT1	-0.541982
CARD10	0.801613	CARD10	-1.56246
COL4A5	0.804696	COL4A5	-0.854652
TNS4	0.805936	TNS4	-2.31274
PCYT1A	0.809589	PCYT1A	-0.387331
C16orf74	0.817908	C16orf74	-1.23618
IGSF3	0.827321	IGSF3	-1.2607
FAT2	0.829366	FAT2	-1.52114
PRRG4	0.836215	PRRG4	-0.64556
NIPAL1	0.839974	NIPAL1	-0.310112
FRRS1	0.84178	FRRS1	-0.488234
PTGFRN	0.855339	PTGFRN	-0.670226
BCL11B	0.866409	BCL11B	-3.01215
SMTN	0.868388	SMTN	-0.898304
FBLIM1	0.872139	FBLIM1	-1.0262
GPR153	0.875938	GPR153	-0.984449
TGM1	0.880796	TGM1	-3.10481
DUSP6	0.881331	DUSP6	-0.421801
FAM160A1	0.891176	FAM160A1	-0.434238
FAT1	0.893092	FAT1	-1.6591
IRS1	0.9121	IRS1	-0.305747
ABLIM1	0.912292	ABLIM1	-2.02078
STON2	0.912491	STON2	-0.76597
WFDC5	0.913945	WFDC5	-6.54249
SOX7	0.914416	SOX7	-1.52195
RNF152	0.930556	RNF152	-2.17571
WLS	0.938375	WLS	-1.23299
KLF7	0.938678	KLF7	-1.63128
LPAR3	0.942607	LPAR3	-1.38627
MAPK6	0.946242	MAPK6	-0.315383
GBP6	0.946292	GBP6	-2.81723
PERP	0.946398	PERP	-1.21042
MPP7	0.948804	MPP7	-1.02901
ZC3H12A	0.948923	ZC3H12A	-1.08617
PC	0.954675	PC	-0.749869
IL1RAP	0.971666	IL1RAP	-2.2783
NRG1	0.98374	NRG1	-1.14349
CTTN	0.988221	CTTN	-0.287105
ARL4D	0.993372	ARL4D	-1.985
SNAI2	0.999317	SNAI2	-0.176439
BCO2	1.0055	BCO2	-1.91577
FGFBP1	1.00685	FGFBP1	-3.13578
DST	1.02461	DST	-1.32987
TIPARP	1.03389	TIPARP	-0.692046
NIPAL4	1.0343	NIPAL4	-3.35506
FOSL1	1.03507	FOSL1	-0.745564
ATP1B3	1.03538	ATP1B3	-0.527874
AKR1B10	1.04089	AKR1B10	-2.60486
DSC3	1.0592	DSC3	-1.56327
GSTM3	1.06047	GSTM3	-0.96607
SERPINB5	1.06842	SERPINB5	-1.0243
SLC22A23	1.08679	SLC22A23	-1.6889
AKR1C3	1.10391	AKR1C3	-1.92212
TSPAN5	1.11059	TSPAN5	-0.586463
SLC2A1	1.11292	SLC2A1	-0.776897
USH1G	1.11572	USH1G	-4.54543
IFFO2	1.11662	IFFO2	-2.77376
SLC16A1	1.11901	SLC16A1	-0.211287
DENND2C	1.12586	DENND2C	-1.46185
AQP3	1.12735	AQP3	-3.26491
DSP	1.13601	DSP	-0.647547
BICD2	1.14059	BICD2	-1.37066
SLC10A6	1.15034	SLC10A6	-5.70183
TNC	1.15321	TNC	-2.03401
MAFB	1.17522	MAFB	-1.98875
PROS1	1.20868	PROS1	-1.15715
PKP1	1.20891	PKP1	-2.13868
SERPINB13	1.23685	SERPINB13	-3.0295
SH2D5	1.24544	SH2D5	-0.81644
SESN3	1.24816	SESN3	-1.33103
ITGA6	1.25175	ITGA6	-1.2227
KCNJ15	1.25278	KCNJ15	-1.08092
DSC2	1.25793	DSC2	-0.353687
CDHR1	1.25815	CDHR1	-5.32141
AKR1C2	1.29342	AKR1C2	-3.08214
KRT16	1.29776	KRT16	-1.73333
SPRR1B	1.30168	SPRR1B	-2.69631
SLC7A8	1.30338	SLC7A8	-1.37257
EPPK1	1.31379	EPPK1	-1.51709
KIRREL	1.31846	KIRREL	-0.686521
KRT6A	1.32238	KRT6A	-2.78027
BNC1	1.32675	BNC1	-1.24447
RDH12	1.3959	RDH12	-5.16964
DSG3	1.42142	DSG3	-0.775061
KRT14	1.43634	KRT14	-2.67041
FAM83G	1.56542	FAM83G	-1.25121
PPP2R2C	1.57783	PPP2R2C	-1.95819
SLC5A10	1.59227	SLC5A10	-1.36552
PTHLH	1.61573	PTHLH	-4.10915
TP63	1.62438	TP63	-2.93012
GJB2	1.6513	GJB2	-7.12505
GJA1	1.65829	GJA1	-0.531377
CA12	1.69355	CA12	-4.92887
AHNAK2	1.71011	AHNAK2	-0.583478
CLCA2	1.73465	CLCA2	-3.4979
PTPRZ1	1.73697	PTPRZ1	-2.06072
GJB6	1.76671	GJB6	-7.49312
HAS3	1.79718	HAS3	-4.13403
KRT75	2.09297	KRT75	-7.10735
KRT6B	2.10277	KRT6B	-2.77928
COL4A6	2.31136	COL4A6	-1.18577
KRT6C	2.55608	KRT6C	-3.12622
IL31RA	2.56593	IL31RA	-0.951429
KLK9	3.38866	KLK9	-3.01409

## Sheet: p63_signature_SE
	baseMean	log2FoldChange	lfcSE	stat	pvalue	padj
PLA2G16	147.472	-1.01424	0.266219	-3.80978	0.00013909	0.00200962
WDR34	2822.53	-0.532665	0.161242	-3.30352	0.000954793	0.00782922
ABHD12	1682.32	-0.46322	0.150983	-3.06803	0.00215474	0.0137464
MIDN	2681.11	0.29613	0.1283	2.3081	0.0209934	0.0688577
RNF141	1696.17	0.296775	0.135932	2.18325	0.0290171	0.0872177
SH3PXD2A	3716.61	0.362189	0.149804	2.41776	0.0156164	0.0555522
AHDC1	1739.34	0.363304	0.151905	2.39165	0.0167728	0.0585883
LIMK2	2560.69	0.3902	0.117003	3.33496	0.000853129	0.00725853
TRAF7	3512.01	0.437651	0.0850075	5.14838	2.63e-07	2.65e-05
SSH3	1258.25	0.441655	0.165783	2.66406	0.0077203	0.0335589
SDC1	22684.9	0.470775	0.181475	2.59416	0.0094822	0.0387899
DAB2IP	2778.93	0.474712	0.17102	2.77577	0.00550704	0.0264851
EXT1	2168.21	0.48573	0.164373	2.95505	0.0031262	0.017823
TPM4	13433.9	0.511705	0.154946	3.30247	0.000958389	0.00785519
NDFIP2	1432.69	0.523185	0.195653	2.67404	0.00749425	0.0328561
HR	2160.06	0.552221	0.199583	2.76687	0.0056597	0.0270166
ADORA2B	423.661	0.560803	0.185271	3.02693	0.00247051	0.0150989
LAD1	7868.01	0.625733	0.197177	3.17346	0.00150632	0.0106669
CAV2	1585.63	0.639102	0.236838	2.69848	0.00696573	0.0311222
ERG	231.452	0.644496	0.215587	2.9895	0.00279439	0.0165168
DUSP7	2669.44	0.645327	0.216057	2.98683	0.00281882	0.016613
TRIM29	17442.3	0.653777	0.210151	3.11099	0.0018646	0.0123859
RIN2	2158.79	0.675168	0.166581	4.05308	5.05e-05	0.000971465
FSCN1	8520.77	0.682304	0.229391	2.97441	0.00293548	0.0170215
GPC1	6601.36	0.692186	0.17363	3.98655	6.7e-05	0.00120459
SERINC2	3211.73	0.693196	0.27381	2.53167	0.0113521	0.0441071
OLFML2A	1273.25	0.718449	0.245592	2.92538	0.00344034	0.0189665
CELSR1	3761.05	0.746496	0.183918	4.05886	4.93e-05	0.000957789
PVRL1	9390.12	0.758106	0.173347	4.37333	1.22e-05	0.000375802
PLEC	15882.2	0.769344	0.181712	4.23387	2.3e-05	0.000565312
JUP	35012.7	0.776429	0.16751	4.63513	3.57e-06	0.000161887
CAV1	3023.55	0.796054	0.353748	2.25034	0.0244273	0.0768223
CARD10	724.183	0.801613	0.284929	2.81338	0.00490241	0.0243066
TNS4	4898.36	0.805936	0.249164	3.23456	0.00121832	0.00921912
FBLIM1	1696.21	0.872139	0.273816	3.18513	0.00144689	0.0103574
TGM1	3590.59	0.880796	0.416604	2.11423	0.0344956	0.0984246
FAT1	5711.46	0.893092	0.278383	3.20815	0.00133593	0.00982522
ZC3H12A	1866.13	0.948923	0.263603	3.59982	0.000318433	0.00366048
NRG1	242.122	0.98374	0.379506	2.59216	0.00953756	0.0389642
FGFBP1	3733.65	1.00685	0.355109	2.83533	0.00457784	0.0232276
DST	12114	1.02461	0.259604	3.94683	7.92e-05	0.00135701
SERPINB5	6967.85	1.06842	0.258081	4.13987	3.47e-05	0.0007567
SLC2A1	16080.4	1.11292	0.238106	4.67407	2.95e-06	0.000141705
IFFO2	2501.66	1.11662	0.290376	3.84544	0.000120336	0.00182043
BICD2	4406.84	1.14059	0.179607	6.35047	2.15e-10	1.46e-07
SLC10A6	97.7965	1.15034	0.43889	2.62101	0.0087669	0.0367562
PKP1	28810.6	1.20891	0.223869	5.40007	6.66e-08	1.02e-05
ITGA6	10431.3	1.25175	0.222957	5.61431	1.97e-08	4.54e-06
KIRREL	210.287	1.31846	0.383081	3.44174	0.000577982	0.00551518
KRT14	131859	1.43634	0.517655	2.7747	0.00552518	0.0265333
FAM83G	935.761	1.56542	0.237329	6.596	4.22e-11	3.87e-08
SLC5A10	12.7346	1.59227	0.257885	6.17437	6.64e-10	3.69e-07
PTHLH	1335.79	1.61573	0.472796	3.4174	0.000632225	0.00585447
TP63	10791.6	1.62438	0.19122	8.49485	1.98e-17	1.82e-13
CLCA2	7449.3	1.73465	0.37771	4.59256	4.38e-06	0.000182263
