# Supplementary material for: p63 Directs Subtype-Specific Gene Expression in HPV+ Head and Neck Squamous Cell Carcinoma
Source: Front Oncol. 2022 May 31;12:879054. doi: 10.3389/fonc.2022.879054 (PMC9192977; doi:10.3389/fonc.2022.879054)
Supplement: Supplementary file 7 [file Table_6.xlsx]

## Sheet: Zhang HPV-KRT p63 Signature
	baseMean	log2FoldChange	lfcSE	stat	pvalue	padj
RBM24	16.0663	-1.39847	0.547778	-2.55298	0.0106806	0.0422244
ST3GAL4	361.281	-0.839885	0.222217	-3.77958	0.000157093	0.00220543
PODXL	1605.99	-0.676869	0.288664	-2.34483	0.0190356	0.0640988
CFL2	434.012	-0.642003	0.244951	-2.62095	0.00876856	0.0367562
TOX	113.509	-0.620089	0.292034	-2.12334	0.033725	0.0969051
CD99L2	774.323	-0.601636	0.163049	-3.68991	0.000224333	0.00282092
HABP4	174.75	-0.563719	0.163367	-3.45063	0.000559276	0.00538003
FYN	575.01	-0.439352	0.203408	-2.15995	0.0307763	0.0908377
TNFRSF19	412.397	-1.36447	0.352458	-3.87128	0.000108264	0.00168505
STMN3	898.784	-1.25656	0.328563	-3.82441	0.000131084	0.00194432
BAMBI	195.857	-1.00888	0.348171	-2.89767	0.00375947	0.0201549
SCG2	32.0334	-0.932611	0.426637	-2.18596	0.0288185	0.0867774
EFHD1	98.7078	-0.904933	0.290665	-3.11332	0.00184993	0.012343
PRKCDBP	321.438	-0.557305	0.233805	-2.38363	0.0171426	0.0594931
SSH3	1258.25	0.441655	0.165783	2.66406	0.0077203	0.0335589
ERMP1	1619.47	0.509579	0.192933	2.64122	0.00826075	0.03529
DUOX1	2227.63	0.63016	0.221558	2.84422	0.00445208	0.022795
DUSP7	2669.44	0.645327	0.216057	2.98683	0.00281882	0.016613
MAOA	1985.4	0.65901	0.276349	2.38471	0.0170928	0.0594115
FGFR3	4841.17	0.676274	0.255983	2.64187	0.00824505	0.0352631
HK2	2720.88	0.682953	0.238345	2.86539	0.00416491	0.0217995
SERINC2	3211.73	0.693195	0.27381	2.53167	0.0113521	0.0441071
DUOXA1	688.856	0.700003	0.221035	3.16694	0.00154053	0.0108231
CPNE8	297.09	0.70457	0.263142	2.67753	0.00741672	0.0325636
B3GNT5	2349.7	0.746878	0.224443	3.3277	0.000875657	0.00737152
RAET1G	122.224	0.768677	0.337984	2.2743	0.0229478	0.0734673
ECM1	3234.79	0.787196	0.323133	2.43613	0.0148453	0.0535172
TGM1	3590.59	0.880796	0.416604	2.11423	0.0344956	0.0984246
ABLIM1	4997.84	0.912292	0.24421	3.73569	0.000187204	0.00248184
GBP6	3987.24	0.946292	0.338245	2.79765	0.00514755	0.0252489
DSC3	17037.2	1.0592	0.247078	4.2869	1.81e-05	0.000486385
SERPINB5	6967.85	1.06842	0.258081	4.13987	3.47e-05	0.0007567
DENND2C	375.733	1.12586	0.265387	4.24231	2.21e-05	0.000554125
AQP3	17395.3	1.12735	0.318635	3.53805	0.00040309	0.00429939
SLC10A6	97.7965	1.15034	0.43889	2.62101	0.0087669	0.0367562
SERPINB13	3691.33	1.23685	0.360718	3.42884	0.00060616	0.00569362
DSC2	8193.68	1.25793	0.259635	4.84501	1.27e-06	7.87e-05
BNC1	1658.97	1.32675	0.343566	3.86171	0.000112598	0.00173415
DSG3	17444.6	1.42142	0.283833	5.00795	5.5e-07	4.54e-05
CLCA2	7449.3	1.73465	0.37771	4.59256	4.38e-06	0.000182263
RBMXL1	1104.96	0.309958	0.094943	3.26468	0.00109589	0.00857717
SERPINB8	768.946	0.42069	0.175005	2.40387	0.0162224	0.0571717
DHCR24	12142.6	0.580479	0.184567	3.14509	0.00166037	0.0114232
LAD1	7868.01	0.625733	0.197177	3.17346	0.00150632	0.0106669
CDCP1	3211.86	0.680557	0.209158	3.25379	0.00113877	0.00878021
MPP7	703.166	0.948804	0.284648	3.33326	0.000858358	0.00729295
ZC3H12A	1866.13	0.948923	0.263603	3.59982	0.000318433	0.00366048
PROS1	554.115	1.20868	0.321513	3.75935	0.000170356	0.0023432
SPRR1B	10024	1.30168	0.451413	2.88358	0.00393187	0.0208777

## Sheet: Keck HPV-KRT p63 Signature
	baseMean	log2FoldChange	lfcSE	stat	pvalue	padj
CTSH	2360.08	-0.894992	0.196568	-4.55309	5.29e-06	0.000208888
ARHGDIB	2810.06	-0.614991	0.207469	-2.96425	0.00303421	0.0174774
FYN	575.01	-0.439352	0.203408	-2.15995	0.0307763	0.0908377
KRT4	9609.33	-1.49683	0.657259	-2.27739	0.0227631	0.072978
S100A4	1467.97	-0.909753	0.222467	-4.08939	4.33e-05	0.000883079
RARRES3	839.692	-0.68922	0.287899	-2.39396	0.0166674	0.0583199
UCP2	2034.17	-0.618957	0.202586	-3.05529	0.00224846	0.014162
PRKCDBP	321.438	-0.557305	0.233805	-2.38363	0.0171426	0.0594931
FNBP1	1313.93	-0.405581	0.16275	-2.49205	0.012701	0.047936
PTK7	2868.02	0.350358	0.161116	2.17457	0.0296622	0.088504
PRKX	1432.02	0.432405	0.178979	2.41596	0.0156939	0.055726
COL7A1	7111.11	0.481825	0.225542	2.1363	0.0326549	0.0946305
ADORA2B	423.661	0.560803	0.185271	3.02693	0.00247051	0.0150989
NDRG1	36061.6	0.641142	0.229181	2.79754	0.00514935	0.025251
UBE2H	1167.1	0.652127	0.147439	4.42304	9.73e-06	0.000321514
MAOA	1985.4	0.65901	0.276348	2.38471	0.0170928	0.0594115
FGFR3	4841.17	0.676274	0.255983	2.64187	0.00824505	0.0352631
HK2	2720.88	0.682953	0.238345	2.86539	0.00416491	0.0217995
PALLD	3852.14	0.709665	0.214034	3.31567	0.00091424	0.00758145
JUP	35012.7	0.776429	0.16751	4.63513	3.57e-06	0.000161887
MAPK6	2466.15	0.946242	0.192499	4.91556	8.85e-07	6.06e-05
PERP	38661.7	0.946398	0.208107	4.54765	5.42e-06	0.000211142
ATP1B3	9516.44	1.03538	0.189301	5.4695	4.51e-08	8.03e-06
SERPINB5	6967.85	1.06842	0.258081	4.13987	3.47e-05	0.0007567
SLC2A1	16080.4	1.11292	0.238106	4.67407	2.95e-06	0.000141705
BICD2	4406.84	1.14059	0.179607	6.35047	2.15e-10	1.46e-07
SERPINB13	3691.33	1.23685	0.360718	3.42884	0.00060616	0.00569362
SLC7A8	1808.38	1.30338	0.279201	4.66826	3.04e-06	0.000143785
GJA1	4675.64	1.65829	0.31176	5.31912	1.04e-07	1.39e-05
CLCA2	7449.3	1.73465	0.37771	4.59256	4.38e-06	0.000182263
NCBP2	2254.57	0.269392	0.121201	2.22269	0.0262369	0.0811631
TUFT1	1340.05	0.743866	0.16553	4.49385	6.99e-06	0.000251963
COL4A5	1138.88	0.804696	0.280214	2.87172	0.00408248	0.0214565
PROS1	554.115	1.20868	0.321513	3.75935	0.000170356	0.0023432
KRT16	62477.1	1.29776	0.457904	2.83413	0.00459509	0.0232772
KRT6A	163621	1.32238	0.327836	4.03367	5.49e-05	0.00103174
