# Supplementary material for: p63 Directs Subtype-Specific Gene Expression in HPV+ Head and Neck Squamous Cell Carcinoma
Source: Front Oncol. 2022 May 31;12:879054. doi: 10.3389/fonc.2022.879054 (PMC9192977; doi:10.3389/fonc.2022.879054)
Supplement: Supplementary file 8 [file Table_7.xlsx]

## Sheet: Sheet1
Gene	Set	Sequence 5' to 3'	G/C%	Melting Temp	Amplicon
SLC2A1	F	AGCAGCTGTCTGGCATCAACGC	59	58.6	176
	R	GCCTATGAGGTGCAGGGTCC	65	57.9
WNT7A	F	CTGGAACTGCTCTGCACTGGG	62	58.3	130
	R	GGTACAGGCAGCTGTGATGGC	62	58.3
GSK3B	F	TGAGGTCTATCTTAATCTGGTGCTGG	46	58	201
	R	GGATCCAACAAGAGGTTCTGCGG	57	58.8
ITGA6	F	TTTCGAAACCAAGGTTCTGAGCCC	50	57.4	189
	R	TGGAAGTGAATTCACTCGCCTACG	50	57.4
KRT16	F	GCTCCGGAGGGTGCTCCAG	74	59.7	149
	R	GCTCCTCCACACTGCCAATCAG	59	58.6
MAOA	F	GGCTCAACATGCTGACAAATGGGAC	52	59.3	172
	R	CCCGCACTGCTTCACATACCACA	57	58.8
PIK3CA	F	caagacgactttgtgaccttcggc	54	59.1	124
	R	tcacacactggcatgccgatagc	57	58.8
PTEN	F	GCTGGAAAGGGACGAACTGGTG	59	58.6	150
	R	CACATAGCGCCTCTGACTGGG	62	58.3
E2F1	F	GACATCACCAACGTCCTTGAGGGC	58	60.8	154
	R	GCTGCTGCTCGCTCTCCTGC	70	60
E2F7	F	CTCCCTAGATGAAGTTGCTGTCAGTC	50	59.5	132
	R	CTGTGCCGTCCATGCCAGCC	70	60.5
CCNA2	F	GGTTCCTGTCTTCCATGTCAGTGC	54	59.1	119
	R	GTACACAAACTCTGCTACTTCTGGGG	50	59.5
MDM2	F	CTTCTAGGAGATTTGTTTGGCGTGCC	50	59.5	195
	R	CTCTTCCTGAAGCTCTTGTACAAGGTC	48	59.7
WNT4	F	CACACTCGACTCCTTGCCCGTC	64	60.4	169
	R	GCTGACCCCATGCACTGTCCTG	64	60.4
ITGA2	F	GAAATCTCTTCGGATGGGAATGTTCC	46	58	181
	R	GCACCCCAGTTAGGTACATCAGTG	54	59.1
panTP63	F	GTGAATTCAACGAGGGACAG	50	58.1	99
	R	GTCTTCCTGTGATGGGATCTTC	50	59.9
Alexandra Glathar
Ph.D. Candidate
Department of Biochemistry
NY State Center of Excellence in Bioinformatics and Life Sciences
University at Buffalo
